# Supplementary material for: Integrated Transcriptomic and Metabolomic Analyses of Cold-Tolerant and Cold-Sensitive Pepper Species Reveal Key Genes and Essential Metabolic Pathways Involved in Response to Cold Stress
Source: MDPI journal article supplement (doi:10.3390/ijms23126683), 2022-06-15
Supplement: s1 [file s1]

**Table S2.** List of primers used for qRT-PCR analysis.

|                    |    |                        |
|--------------------|----|------------------------|
| <b>IAA</b>         | FW | CAGAGGAGTCTGGAGTTCGC   |
|                    | RV | ACGTTCTCCGGCAGTTGATT   |
| <b>Hexokinase</b>  | FW | TAGCCAACAAACAGAACCCC   |
|                    | RV | GGCTGTGGCATTGACAGTTT   |
| <b>Psb</b>         | FW | AACTCGTGTGCTTGGGAGTC   |
|                    | RV | GAAGCGACCCCATAGGCTTT   |
| <b>MYC</b>         | FW | ACAGCTGATCAATCTGGTGTGA |
|                    | RV | AATTCCGTCTCGCGATTGGT   |
| <b>Glucosidase</b> | FW | TGTTCCCTCGGAATGTGGAGC  |
|                    | RV | CTTCCGCAACCGATCCTCTT   |
