# Supplementary material for: Integrated Transcriptomic and Metabolomic Analyses of Cold-Tolerant and Cold-Sensitive Pepper Species Reveal Key Genes and Essential Metabolic Pathways Involved in Response to Cold Stress
Source: MDPI journal article supplement (doi:10.3390/ijms23126683), 2022-06-15
Supplement: s1 [file s1]

**Table S1.** Summary of sequencing data for different samples

| <b>Sample</b> | <b>Raw_reads</b> | <b>Clean_reads</b> | <b>Clean_bases</b> | <b>Error_rate</b> | <b>Q20</b> | <b>Q30</b> | <b>GC_pct</b> |
|---------------|------------------|--------------------|--------------------|-------------------|------------|------------|---------------|
| <b>Cc0-1</b>  | 45048498         | 44170816           | 6.63G              | 0.03              | 95.69      | 89.24      | 42.05         |
| <b>Cc0-2</b>  | 48891838         | 47642794           | 7.15G              | 0.03              | 95.97      | 89.78      | 42.31         |
| <b>Cc0-3</b>  | 52082416         | 50807534           | 7.62G              | 0.03              | 95.84      | 89.55      | 42.37         |
| <b>Cc2-1</b>  | 57697044         | 56877384           | 8.53G              | 0.03              | 94.65      | 87.14      | 41.98         |
| <b>Cc2-2</b>  | 43517342         | 42798150           | 6.42G              | 0.03              | 95.23      | 88.43      | 42.04         |
| <b>Cc2-3</b>  | 41447528         | 40628878           | 6.09G              | 0.03              | 95.58      | 89.08      | 42.17         |
| <b>Cc6-1</b>  | 63743738         | 61933538           | 9.29G              | 0.03              | 95.73      | 89.19      | 42.07         |
| <b>Cc6-2</b>  | 53216086         | 51654824           | 7.75G              | 0.03              | 95.65      | 89.12      | 42.05         |
| <b>Cc6-3</b>  | 42768604         | 41326264           | 6.2G               | 0.03              | 95.89      | 89.61      | 41.71         |
| <b>Cc12-1</b> | 49641942         | 47185700           | 7.08G              | 0.03              | 97.16      | 92.27      | 41.62         |
| <b>Cc12-2</b> | 46722346         | 45644374           | 6.85G              | 0.03              | 95.35      | 88.42      | 42.02         |
| <b>Cc12-3</b> | 53160708         | 51814502           | 7.77G              | 0.03              | 95.48      | 88.88      | 42.1          |
| <b>Cp0-1</b>  | 66453898         | 65208758           | 9.78G              | 0.03              | 95.18      | 88.33      | 42.27         |
| <b>Cp0-2</b>  | 60439190         | 59653034           | 8.95G              | 0.03              | 95.25      | 88.47      | 42.24         |
| <b>Cp0-3</b>  | 59372212         | 58150980           | 8.72G              | 0.03              | 95.92      | 89.68      | 42.15         |
| <b>Cp2-1</b>  | 41070852         | 40266368           | 6.04G              | 0.03              | 95.56      | 89.03      | 42.39         |
| <b>Cp2-2</b>  | 46205440         | 44465114           | 6.67G              | 0.03              | 97.7       | 93.56      | 42.36         |
| <b>Cp2-3</b>  | 46450528         | 44976660           | 6.75G              | 0.03              | 95.87      | 89.78      | 41.79         |
| <b>Cp6-1</b>  | 56955370         | 55749512           | 8.36G              | 0.03              | 95.95      | 89.69      | 41.94         |
| <b>Cp6-2</b>  | 49412636         | 46900584           | 7.04G              | 0.03              | 97.65      | 93.49      | 42.17         |
| <b>Cp6-3</b>  | 45795510         | 44848932           | 6.73G              | 0.03              | 95.39      | 88.68      | 42.23         |
| <b>Cp12-1</b> | 61485338         | 59113302           | 8.87G              | 0.03              | 95.7       | 89.27      | 41.78         |
| <b>Cp12-2</b> | 49182128         | 47878336           | 7.18G              | 0.03              | 95.4       | 88.74      | 41.92         |
| <b>Cp12-3</b> | 43444776         | 42936310           | 6.44G              | 0.03              | 95.82      | 89.49      | 41.92         |
