# Supplementary material for: Integrated Transcriptomic and Metabolomic Analyses of Cold-Tolerant and Cold-Sensitive Pepper Species Reveal Key Genes and Essential Metabolic Pathways Involved in Response to Cold Stress
Source: MDPI journal article supplement (doi:10.3390/ijms23126683), 2022-06-15
Supplement: s1 [file s1]

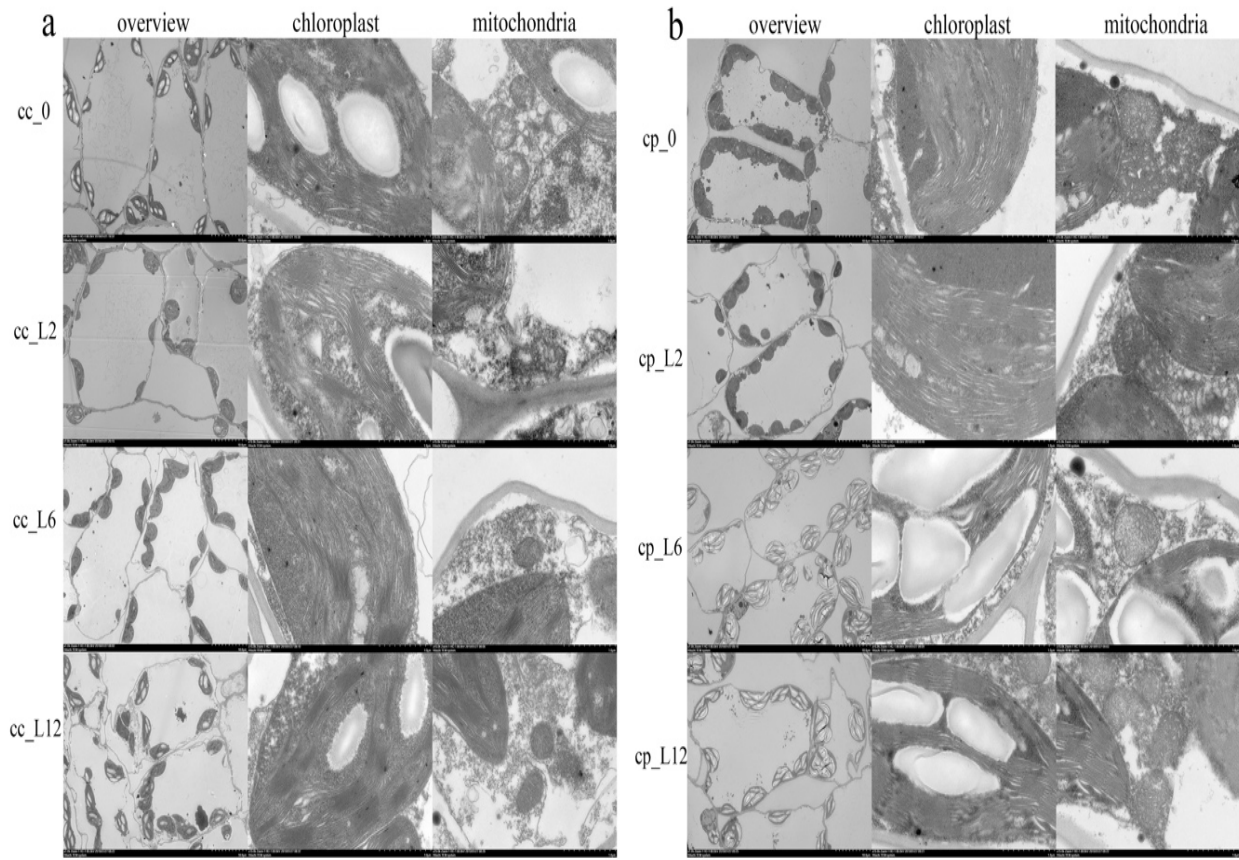

**Figure S1.** Transmission electron microscope images of *Cp* and *Cc* pepper leaves under cold stress at different time points. Scale bars = 10 μm. Sections were examined with a Phillips Morgagni 268 transmission electron microscope at an accelerating voltage of 80 kV. Digital images were recorded with a MegaViewIII digital camera operated with iTEM software.
