# Supplementary material for: Integrated Transcriptomic and Metabolomic Analyses of Cold-Tolerant and Cold-Sensitive Pepper Species Reveal Key Genes and Essential Metabolic Pathways Involved in Response to Cold Stress
Source: Int J Mol Sci. 2022 Jun 15;23(12):6683. doi: 10.3390/ijms23126683 (PMC9224482; doi:10.3390/ijms23126683)
Supplement: Supplementary file 1 [file ijms-23-06683-s001.zip]

Archive with 8 entries (8 files):
- Figure S1.pdf
- S1_DEGs All comparisons.xlsx
- S2_WGCNA.xlsx
- S3_DEGs KEGGenrich.xlsx
- S4_DAMs All comparisons.xlsx
- S5_KEGGenrich DAMs.xlsx
- Table S1.pdf
- Table S2.pdf
