# Supplementary material for: Integrated Transcriptomic and Metabolomic Analyses of Cold-Tolerant and Cold-Sensitive Pepper Species Reveal Key Genes and Essential Metabolic Pathways Involved in Response to Cold Stress
Source: Int J Mol Sci. 2022 Jun 15;23(12):6683. doi: 10.3390/ijms23126683 (PMC9224482; doi:10.3390/ijms23126683)
Supplement: Supplementary file 1 [file ijms-23-06683-s001.zip › S1_DEGs All comparisons.xlsx]

## Sheet: cp2vscp0_DEGs
gene_id	cp_L2_1	cp_L2_2	cp_L2_3	cp_0h_1	cp_0h_2	cp_0h_3	cp_L2	cp_0	log2FoldChange	pvalue	padj	gene_name	gene_chr	gene_start	gene_end	gene_strand	gene_length	gene_biotype	gene_description	tf_family
107859832	3831.67	4103.77	3880.58	68.2193	91.3008	53.5482	3938.67	71.0228	5.79343	6.85779e-95	1.66116e-90	LOC107859832	NC_029978.1	146869483	146871366	+	1884	protein_coding	uncharacterized LOC107859832	-
107860115	1774.92	2207.94	1921.01	172.822	161.021	174.032	1967.96	169.292	3.5392	7.07964e-58	8.57451e-54	LOC107860115	NC_029978.1	151879472	151880340	+	869	protein_coding	probable calcium-binding protein CML18	-
107850822	8014.91	6222.7	5943.76	508.613	571.045	439.263	6727.12	506.307	3.73179	3.84722e-50	3.10638e-46	LOC107850822	NC_029988.1	226036654	226038243	-	1590	protein_coding	mitochondrial uncoupling protein 5	Mito_carr
107852027	3238.13	3093.43	3394.55	491.179	502.985	460.18	3242.04	484.781	2.74146	9.38357e-48	5.68246e-44	LOC107852027	NW_015960370.1	203515	205891	-	2377	protein_coding	9-cis-epoxycarotenoid dioxygenase NCED1%2C chloroplastic-like	RPE65
107878344	3470.14	4760.37	3764.86	420.686	415.834	396.591	3998.46	411.037	3.28215	6.49286e-45	3.14553e-41	LOC107878344	NC_029983.1	198157969	198158964	+	996	protein_coding	ethylene-responsive transcription factor 4-like	AP2
107875464	751.532	772.201	760.467	105.361	97.9409	103.75	761.4	102.351	2.89494	1.49146e-41	6.02127e-38	LOC107875464	NC_029982.1	4771393	4773708	-	1462	protein_coding	probable protein phosphatase 2C 2	PP2C
107862969	2006.93	2150.14	2208.66	385.818	401.724	367.307	2121.91	384.95	2.46275	1.81418e-37	6.27783e-34	LOC107862969	NC_029979.1	35166656	35171226	-	2370	protein_coding	uncharacterized calcium-binding protein At1g02270%2C transcript variant X3	Exo_endo_phos
107860095	307.445	235.822	304.187	4.54796	3.32003	5.02014	282.484	4.29604	6.03712	4.35022e-37	1.31719e-33	LOC107860095	NC_029978.1	151491832	151492839	+	1008	protein_coding	uncharacterized LOC107860095	-
107840605	3192.59	2039.17	4209.02	162.968	180.112	150.604	3146.92	164.561	4.25727	5.54381e-36	1.49209e-32	LOC107840605	NC_029977.1	181420777	181424561	-	1782	protein_coding	uncharacterized LOC107840605	-
107851279	2658.83	3582.41	3027.54	274.393	293.823	183.235	3089.59	250.484	3.62446	2.92722e-35	7.09061e-32	LOC107851279	NC_029988.1	147010676	147013264	+	2051	protein_coding	L-ascorbate oxidase	-
107857552	1994.12	1783.69	1690.66	244.074	289.673	301.209	1822.82	278.318	2.71159	3.27324e-34	7.20797e-31	LOC107857552	NC_029978.1	9145535	9148984	-	2164	protein_coding	protein REVEILLE 1-like	Myb_DNA-binding
107848516	357.262	367.605	306.391	33.3517	35.6903	34.3043	343.753	34.4488	3.31883	4.92637e-33	9.94428e-30	LOC107848516	NC_029987.1	214101727	214104158	-	2432	protein_coding	U-box domain-containing protein 18-like	Arm
107867466	552.262	327.145	495.957	28.0457	23.2402	19.2439	458.455	23.5099	4.28196	3.26609e-32	6.08573e-29	LOC107867466	NC_029980.1	24515669	24516730	+	1062	protein_coding	protein EXORDIUM-like	-
107867470	200.693	245.07	277.736	8.33792	5.81005	10.877	241.166	8.34165	4.8556	6.2735e-32	1.08545e-28	LOC107867470	NC_029980.1	24582788	24583967	+	1180	protein_coding	protein EXORDIUM-like	-
107868614	2190.54	2288.86	1798.67	322.147	346.113	281.965	2092.69	316.742	2.72379	1.26689e-31	2.04586e-28	LOC107868614	NC_029980.1	10583374	10583892	-	519	protein_coding	uncharacterized LOC107868614	-
107843723	444.087	534.067	422.114	31.8357	45.6504	46.8547	466.756	41.4469	3.49629	2.06051e-31	3.11948e-28	LOC107843723	NC_029986.1	197357294	197358278	+	985	protein_coding	protein YLS9-like	-
107872417	237.7	223.106	217.119	3.78996	1.66002	7.53022	225.975	4.32673	5.71213	1.14546e-30	1.63215e-27	LOC107872417	NC_029981.1	63900831	63902026	-	1196	protein_coding	uncharacterized LOC107872417	-
107849576	119.562	101.727	103.6	667.792	815.067	722.064	108.296	734.974	-2.76532	1.63244e-29	2.19681e-26	LOC107849576	NC_029988.1	19849453	19850800	-	1348	protein_coding	BRI1 kinase inhibitor 1-like	-
107862137	1782.04	2328.16	2045.55	339.581	283.033	357.267	2051.92	326.627	2.65138	2.52573e-28	3.22004e-25	LOC107862137	NC_029979.1	9303987	9306108	-	1573	protein_coding	nudix hydrolase 18%2C mitochondrial-like%2C transcript variant X2	NUDIX
107878492	222.043	188.426	222.629	7.57993	3.32003	1.67338	211.033	4.19111	5.6285	4.58839e-28	5.55723e-25	LOC107878492	NC_029983.1	209676174	209677551	+	966	protein_coding	xyloglucan endotransglucosylase/hydrolase protein 15-like	-
107871200	926.604	791.853	1081.19	65.9454	92.1308	45.1813	933.214	67.7525	3.78391	5.09497e-28	5.87692e-25	LOC107871200	NC_029981.1	202165907	202168388	+	2482	protein_coding	L-type lectin-domain containing receptor kinase S.4	Pkinase
107876931	207.81	232.354	255.693	23.4978	18.2602	20.0806	231.952	20.6128	3.49076	1.74696e-27	1.92348e-24	LOC107876931	NC_029983.1	218570692	218572301	-	1610	protein_coding	mitogen-activated protein kinase kinase kinase 2-like	Pkinase
107867467	900.984	1483.14	877.292	78.0732	59.7605	38.4878	1087.14	58.7739	4.20752	2.25522e-27	2.37513e-24	LOC107867467	NC_029980.1	24532439	24533640	+	1202	protein_coding	protein EXORDIUM-like	-
107873411	448.357	538.691	639.233	55.3335	68.8906	48.5281	542.094	57.584	3.23586	2.41819e-27	2.44066e-24	LOC107873411	NC_029982.1	170261905	170264222	-	1579	protein_coding	putative protein phosphatase 2C 53	PP2C
107858303	473.977	381.477	263.408	17.4338	15.7701	26.7741	372.954	19.9927	4.22236	2.10036e-26	2.03508e-23	LOC107858303	NC_029978.1	150189594	150192075	+	1044	protein_coding	uncharacterized LOC107858303	-
107879692	257.627	175.711	209.404	6.06394	8.30008	14.2237	214.247	9.52925	4.49806	7.49845e-25	6.98596e-22	LOC107879692	NC_029984.1	100748282	100750230	-	1949	protein_coding	F-box only protein 13-like	F-box
107851226	2206.2	3959.27	2193.23	251.654	278.883	195.786	2786.23	242.107	3.52459	3.96901e-24	3.56079e-21	LOC107851226	NC_029988.1	196538439	196539663	+	1225	protein_coding	ethylene-responsive transcription factor 5-like	AP2
107860587	203.54	221.95	198.383	1.51599	2.49002	0	207.958	1.33534	7.27437	8.32713e-24	7.20386e-21	LOC107860587	NC_029978.1	160777226	160778744	+	1519	protein_coding	probable galacturonosyltransferase-like 10	Glyco_transf_8
107871071	4086.45	3049.5	2641.8	476.019	474.764	347.227	3259.25	432.67	2.91286	1.53739e-23	1.28415e-20	LOC107871071	NC_029981.1	187889457	187890881	+	1425	protein_coding	ethylene-responsive transcription factor 5-like	AP2
107851262	2332.88	2794.03	2364.06	503.307	349.433	450.976	2496.99	434.572	2.52232	1.67179e-23	1.34986e-20	LOC107851262	NC_029988.1	227855146	227860190	-	2047	protein_coding	tonoplast dicarboxylate transporter	Na_sulph_symp
107872813	1616.93	1372.16	1212.34	267.571	292.163	243.477	1400.48	267.737	2.38659	2.02439e-23	1.58183e-20	LOC107872813	NC_029982.1	31590629	31593559	+	2660	protein_coding	3-ketoacyl-CoA synthase 11-like	-
107863344	584.999	180.334	308.595	6.82193	9.96009	6.69352	357.976	7.82518	5.51612	5.17468e-23	3.91707e-20	LOC107863344	NC_029979.1	65310036	65310911	-	876	misc_RNA	dehydration-responsive element-binding protein 1A-like	-
107853664	187.883	146.811	196.178	15.9178	14.1101	10.0403	176.957	13.3561	3.72316	9.53645e-23	7.00004e-20	LOC107853664	NC_029977.1	29056027	29056916	-	890	protein_coding	uncharacterized LOC107853664	Auxin_inducible
107855321	355.839	653.134	566.493	25.7718	48.1404	25.1007	525.155	33.0043	3.99433	2.73588e-22	1.94915e-19	LOC107855321	NW_015961387.1	536725	538995	+	1686	protein_coding	probable WRKY transcription factor 53	WRKY
novel.835	1457.52	2048.41	1172.66	134.923	203.352	129.687	1559.53	155.987	3.32193	4.48177e-22	3.10177e-19	-	NC_029978.1	103609501	103610246	+	704	-	-	-
107860501	1893.06	2362.84	1540.77	353.225	317.893	283.638	1932.23	318.252	2.60175	8.27297e-22	5.56656e-19	LOC107860501	NC_029978.1	159222017	159225576	+	2108	protein_coding	probable WRKY transcription factor 3	WRKY
107875632	4430.91	4040.19	4226.65	1318.91	1251.65	1243.32	4232.58	1271.29	1.73513	1.00831e-21	6.60115e-19	LOC107875632	NC_029982.1	8775618	8779472	+	1722	protein_coding	UDP-D-apiose/UDP-D-xylose synthase 2	Epimerase
107854937	1521.57	4862.09	2435.7	155.389	158.531	150.604	2939.79	154.841	4.24697	2.18897e-21	1.39535e-18	LOC107854937	NW_015961299.1	404097	405994	+	1226	protein_coding	probable WRKY transcription factor 17	WRKY
107847695	140.912	235.822	141.072	5.30595	2.49002	0.836691	172.602	2.87755	5.88087	2.63371e-21	1.63581e-18	LOC107847695	NC_029987.1	12796603	12797516	-	914	protein_coding	putative calcium-binding protein CML19	-
107839290	1535.8	1371	1439.38	307.745	331.173	232.6	1448.73	290.506	2.31781	4.037e-21	2.44471e-18	LOC107839290	NC_029984.1	124129795	124132032	-	1303	protein_coding	probable WRKY transcription factor 53	WRKY
107867225	1305.22	4767.3	1498.89	68.2193	93.7909	71.1187	2523.8	77.7096	5.0217	4.72066e-21	2.78899e-18	LOC107867225	NC_029980.1	10996506	10997340	-	835	protein_coding	zinc finger protein ZAT10-like	-
107850059	9008.42	2261.12	5396.01	244.832	215.802	135.544	5555.18	198.726	4.80466	7.89471e-21	4.55318e-18	LOC107850059	NC_029977.1	288783749	288787049	-	2309	protein_coding	abscisic acid 8'-hydroxylase 1-like	p450
107848525	451.204	301.713	609.476	35.6257	29.0503	46.018	454.131	36.898	3.62216	1.22033e-20	6.87443e-18	LOC107848525	NC_029987.1	150884769	150886685	-	1364	lncRNA	uncharacterized LOC107848525%2C transcript variant X1	-
107867413	782.845	740.99	903.743	147.051	150.231	98.7295	809.193	132.004	2.61546	1.47038e-20	8.09477e-18	LOC107867413	NC_029980.1	21209022	21211962	+	1050	protein_coding	dihydrofolate reductase-like	-
107875390	260.474	203.454	177.442	25.7718	15.7701	17.5705	213.79	19.7041	3.433	2.95451e-20	1.59038e-17	LOC107875390	NC_029982.1	3339182	3341985	+	1226	protein_coding	calcium uniporter protein 6%2C mitochondrial-like	-
107849720	108.175	198.83	147.685	9.09591	6.64006	5.85683	151.563	7.1976	4.39204	3.04597e-20	1.60397e-17	LOC107849720	NC_029988.1	41673377	41674792	-	1416	protein_coding	RING-H2 finger protein ATL3-like	-
107878738	1231.2	2450.7	1120.86	100.055	134.461	66.0986	1600.92	100.205	3.9979	4.15837e-20	2.14315e-17	LOC107878738	NC_029983.1	217855643	217858936	-	2148	protein_coding	scarecrow-like protein 21	GRAS
107870681	239.124	566.435	204.995	12.1279	12.4501	5.85683	336.851	10.1449	5.0506	6.16016e-20	3.1087e-17	LOC107870681	NC_029981.1	74501512	74502393	-	882	protein_coding	uncharacterized LOC107870681	-
107851774	774.305	640.419	286.553	30.3197	24.9002	40.1611	567.092	31.7937	4.15648	7.85527e-20	3.88323e-17	LOC107851774	NC_029988.1	23140543	23141748	-	1206	protein_coding	zinc finger protein ZAT10-like	-
107875683	2274.52	7509.31	2494.11	209.964	171.812	174.032	4092.65	185.269	4.46526	3.81596e-19	1.84868e-16	LOC107875683	NC_029982.1	9968130	9969176	+	1047	protein_coding	probable CCR4-associated factor 1 homolog 9	CAF1
107851739	251.934	560.655	278.838	15.1599	20.7502	5.85683	363.809	13.9223	4.70671	1.76915e-18	8.40278e-16	LOC107851739	NC_029977.1	300742033	300744198	-	1518	protein_coding	probable WRKY transcription factor 53	WRKY
107862053	456.897	404.597	304.187	65.9454	42.3304	52.7115	388.56	53.6624	2.85332	2.22496e-18	1.03644e-15	LOC107862053	NC_029979.1	7748272	7750050	-	1779	protein_coding	mitogen-activated protein kinase kinase kinase NPK1-like	Pkinase
107878491	173.649	107.507	134.459	11.3699	10.7901	6.69352	138.539	9.61784	3.84177	2.33304e-18	1.06629e-15	LOC107878491	NC_029983.1	209636499	209637970	+	1147	pseudogene	-	-
107867471	2465.25	2933.9	2484.19	746.623	665.666	565.603	2627.78	659.297	1.99471	8.17002e-18	3.66486e-15	LOC107867471	NC_029980.1	24604576	24605785	-	1210	protein_coding	protein EXORDIUM-like	-
107862048	2529.3	2859.92	4198	580.622	617.526	540.502	3195.74	579.55	2.46332	8.39235e-18	3.69614e-15	LOC107862048	NC_029979.1	7554907	7556790	-	904	protein_coding	chaperone protein dnaJ 8%2C chloroplastic	DnaJ
107853343	337.335	298.245	254.591	58.3654	46.4804	39.3245	296.724	48.0568	2.62289	1.18901e-17	5.14308e-15	LOC107853343	NW_015960832.1	766	3883	-	1845	protein_coding	reticuline oxidase-like protein	BBE
107860690	6507.58	3318.85	5168.97	626.86	729.577	440.936	4998.47	599.124	3.06043	1.32447e-17	5.62855e-15	LOC107860690	NC_029978.1	162242214	162245391	-	2458	protein_coding	uncharacterized LOC107860690%2C transcript variant X3	-
107842292	584.999	712.09	756.058	162.21	174.302	143.074	684.382	159.862	2.0986	1.50737e-17	6.29537e-15	LOC107842292	NC_029985.1	25218239	25219798	-	1560	protein_coding	ethylene-responsive transcription factor 4-like	AP2
107878043	436.97	428.872	436.442	83.3792	96.2809	58.5683	434.095	79.4095	2.45009	2.18947e-17	8.97727e-15	LOC107878043	NC_029983.1	149644506	149646703	-	2198	protein_coding	aspartyl protease family protein 2-like	-
107866094	72.5911	142.187	180.749	3.78996	2.49002	1.67338	131.842	2.65112	5.6259	2.22366e-17	8.97727e-15	LOC107866094	NC_029979.1	36645067	36646506	-	1138	protein_coding	lignin-forming anionic peroxidase-like	-
107862580	368.649	432.34	275.531	56.0915	63.9106	47.6914	358.84	55.8978	2.68194	2.37562e-17	9.43355e-15	LOC107862580	NC_029979.1	20452659	20454473	-	1796	protein_coding	E3 ubiquitin-protein ligase ATL31-like	-
107845495	253.357	216.17	357.089	16.6758	11.6201	30.9576	275.539	19.7512	3.805	2.64337e-17	1.0302e-14	LOC107845495	NC_029977.1	229135924	229137578	+	1192	protein_coding	cyclin-U2-1	-
107856505	1437.59	1263.5	1108.74	352.467	341.133	351.41	1269.94	348.337	1.86571	2.67938e-17	1.0302e-14	LOC107856505	NW_015961666.1	21724	23065	+	1342	protein_coding	calmodulin-like protein 7	-
107854363	101.058	144.499	76.0467	3.78996	3.32003	5.02014	107.201	4.04338	4.73087	3.70072e-17	1.40066e-14	LOC107854363	NW_015961147.1	87774	89380	-	1113	protein_coding	inorganic pyrophosphatase 1-like	-
107845380	6536.05	9575.07	10049.2	1517.5	1728.91	1102.76	8720.1	1449.72	2.5886	3.89916e-17	1.45307e-14	LOC107845380	NC_029986.1	60838562	60843323	+	929	protein_coding	ubiquitin-conjugating enzyme E2-17 kDa-like	UQ_con
107866863	7599.29	5515.23	8322.15	1527.36	1685.75	1701.83	7145.56	1638.31	2.12486	7.07187e-17	2.59548e-14	LOC107866863	NC_029980.1	2055964	2058666	+	1349	protein_coding	kinesin-related protein 12-like	-
107862585	1071.79	1294.71	857.454	236.494	240.702	195.786	1074.65	224.327	2.25992	1.10776e-16	4.00498e-14	LOC107862585	NC_029979.1	20516612	20517684	+	963	protein_coding	uncharacterized LOC107862585	-
107867163	1357.88	2397.52	1787.65	338.823	354.413	304.555	1847.68	332.597	2.47411	1.16786e-16	4.16015e-14	LOC107867163	NC_029980.1	9062748	9064714	+	1493	protein_coding	probable WRKY transcription factor 7	WRKY
107867469	476.824	135.251	218.221	12.8859	11.6201	10.877	276.765	11.7943	4.54942	1.49097e-16	5.23416e-14	LOC107867469	NC_029980.1	24568159	24569349	+	1191	protein_coding	protein EXORDIUM-like	-
107866742	536.605	797.633	346.068	34.8677	57.2705	22.5906	560.102	38.2429	3.87264	2.07134e-16	7.16773e-14	LOC107866742	NC_029980.1	360517	361456	-	940	protein_coding	uncharacterized LOC107866742	-
107839651	422.737	505.168	436.442	114.457	119.521	94.546	454.782	109.508	2.05416	2.66561e-16	9.09424e-14	LOC107839651	NC_029984.1	132721582	132723737	-	1245	protein_coding	F-box protein PP2-B15-like	-
107859471	186.46	79.7633	274.429	4.54796	7.47007	5.85683	180.217	5.95829	4.92324	2.74072e-16	9.22063e-14	LOC107859471	NC_029978.1	138842342	138843867	+	1281	protein_coding	F-box protein At1g61340%2C transcript variant X1	-
107863343	142.336	167.619	70.5361	4.54796	6.64006	3.34676	126.83	4.84493	4.70973	3.70866e-16	1.23061e-13	LOC107863343	NC_029979.1	65249326	65250562	+	1237	protein_coding	dehydration-responsive element-binding protein 1A-like	AP2
107854545	1113.06	364.137	835.411	59.1234	43.9904	68.6086	770.871	57.2408	3.75083	5.00883e-16	1.63958e-13	LOC107854545	NW_015961180.1	1198818	1201623	+	2680	lncRNA	uncharacterized LOC107854545	-
novel.4601	323.102	438.12	645.846	7.57993	35.6903	22.5906	469.023	21.9536	4.42219	5.12904e-16	1.65654e-13	-	NC_029985.1	232472886	232475626	+	1282	-	-	-
107854231	6126.12	6078.2	7081.16	1230.98	1714.8	1034.99	6428.49	1326.92	2.27644	6.04584e-16	1.92695e-13	LOC107854231	NW_015961127.1	725460	729143	+	1456	protein_coding	tetraspanin-8	Tetraspannin
107868281	861.13	724.806	1019.47	227.398	211.652	220.05	868.467	219.7	1.98297	8.06897e-16	2.53837e-13	LOC107868281	NC_029980.1	205328571	205334820	-	2040	protein_coding	bifunctional 15-cis-phytoene synthase%2C chromoplastic	-
107872774	321.678	387.257	374.723	92.4751	94.6209	95.3827	361.219	94.1596	1.9409	9.89873e-16	3.07406e-13	LOC107872774	NC_029982.1	29888678	29890486	+	1721	protein_coding	transcription factor TCP8	TCP
novel.4049	845.473	687.814	662.378	184.95	174.302	210.009	731.888	189.754	1.9469	1.07902e-15	3.3085e-13	-	NC_029984.1	2303934	2304810	+	877	-	-	-
107860821	214.927	301.713	576.412	31.8357	28.2203	17.5705	364.351	25.8755	3.81495	1.9051e-15	5.7684e-13	LOC107860821	NC_029978.1	163950092	163952784	-	1672	protein_coding	glycerophosphodiester phosphodiesterase GDPD1%2C chloroplastic-like	-
107862192	260.474	142.187	261.204	20.4658	27.3902	14.2237	221.288	20.6933	3.4178	1.93251e-15	5.77916e-13	LOC107862192	NC_029979.1	10642330	10646063	+	1854	protein_coding	protein SAR DEFICIENT 1-like%2C transcript variant X1	-
107876015	4341.23	3839.04	2457.74	736.011	664.006	566.44	3546.01	655.485	2.4353	2.57984e-15	7.62091e-13	LOC107876015	NC_029982.1	20041672	20043742	-	1657	protein_coding	probable WRKY transcription factor 40	WRKY
107858876	858.283	587.243	541.144	103.845	115.371	63.5885	662.223	94.2682	2.81123	3.2257e-15	9.41401e-13	LOC107858876	NC_029978.1	109759637	109761849	+	1651	protein_coding	cytochrome P450 71D7-like	p450
107878483	1151.49	181.49	535.633	20.4658	23.2402	10.877	622.873	18.1943	5.09578	4.45381e-15	1.28434e-12	LOC107878483	NC_029983.1	209530551	209532076	+	1114	protein_coding	xyloglucan endotransglucosylase/hydrolase protein 15-like	-
107862684	8266.85	4245.95	6049.57	1150.63	715.467	906.136	6187.46	924.078	2.74307	5.60347e-15	1.59686e-12	LOC107862684	NC_029979.1	24518551	24522144	-	2179	protein_coding	malate synthase%2C glyoxysomal-like	-
107838958	898.137	857.745	572.003	81.8632	130.311	54.3849	775.962	88.8531	3.12632	8.14954e-15	2.29542e-12	LOC107838958	NC_029984.1	67001561	67003805	+	2245	protein_coding	uncharacterized LOC107838958	-
107873314	512.408	710.934	613.884	148.567	147.741	170.685	612.409	155.664	1.97706	1.08807e-14	3.02946e-12	LOC107873314	NC_029982.1	133763268	133765525	-	2258	protein_coding	peptide-N4-(N-acetyl-beta-glucosaminyl)asparagine amidase A-like	-
107859826	451.204	805.725	599.556	87.9272	117.031	68.6086	618.828	91.1889	2.76327	1.2698e-14	3.49527e-12	LOC107859826	NC_029978.1	145972077	145972801	-	725	protein_coding	uncharacterized LOC107859826	-
107874740	2664.52	1974.43	3750.53	516.193	549.465	413.325	2796.5	492.994	2.50399	1.61852e-14	4.40511e-12	LOC107874740	NC_029977.1	59375500	59386749	+	2444	protein_coding	NAD(H) kinase 1	NAD_kinase
107840986	69.7444	78.6073	110.213	5.30595	5.81005	7.53022	86.1881	6.21541	3.80065	1.66535e-14	4.48219e-12	LOC107840986	NC_029985.1	7635293	7636750	-	1458	protein_coding	ethylene-responsive transcription factor ERF034-like	AP2
107854237	259.051	129.471	186.259	1303.75	1802.78	1045.86	191.594	1384.13	-2.85517	1.71924e-14	4.53129e-12	LOC107854237	NW_015961127.1	1238273	1240485	-	2213	protein_coding	cation/calcium exchanger 1-like	Na_Ca_ex
107867541	9801.22	6094.38	7536.34	1989.73	1685.75	1869.17	7810.65	1848.21	2.0792	1.721e-14	4.53129e-12	LOC107867541	NC_029980.1	30897591	30899567	-	1977	protein_coding	ethylene-responsive transcription factor RAP2-13-like	AP2
107869182	223.467	154.903	106.906	870.934	978.579	993.988	161.759	947.834	-2.55497	2.87427e-14	7.48639e-12	LOC107869182	NC_029980.1	206377695	206403093	+	2014	protein_coding	beta-glucosidase 18-like	Glyco_hydro_1
107860321	1604.12	2197.54	3137.75	188.74	276.393	82.8324	2313.14	182.655	3.66269	3.35593e-14	8.64795e-12	LOC107860321	NC_029978.1	156175216	156177331	+	1528	protein_coding	patatin-like protein 3	-
107878394	126.679	145.655	200.587	23.4978	25.7302	21.754	157.64	23.6607	2.73858	3.67874e-14	9.38002e-12	LOC107878394	NC_029983.1	203152752	203153722	-	971	protein_coding	glutaredoxin-C9-like	-
107860279	290.364	745.614	374.723	37.8996	49.8005	20.9173	470.234	36.2058	3.6992	7.29083e-14	1.83964e-11	LOC107860279	NC_029978.1	155025624	155026987	-	1059	protein_coding	caffeoyl-CoA O-methyltransferase-like	-
107873437	4963.24	3032.16	4080.07	765.573	960.319	589.867	4025.16	771.919	2.38241	9.52339e-14	2.3782e-11	LOC107873437	NC_029982.1	176734901	176738995	+	1777	protein_coding	mitogen-activated protein kinase 3-like	Pkinase
107854073	1040.47	1042.7	1838.35	223.608	267.262	207.499	1307.17	232.79	2.48976	1.10762e-13	2.73773e-11	LOC107854073	NW_015961066.1	22658	33569	-	2425	protein_coding	glutamine--fructose-6-phosphate aminotransferase [isomerizing] 2	SIS
107860573	1086.02	1303.96	1614.61	341.855	387.614	346.39	1334.86	358.619	1.89672	1.61248e-13	3.94537e-11	LOC107860573	NC_029978.1	160550581	160555615	-	2628	protein_coding	uncharacterized LOC107860573%2C transcript variant X4	-
107851468	170.803	390.725	346.068	37.8996	35.6903	40.9978	302.532	38.1959	2.98748	1.77828e-13	4.30753e-11	LOC107851468	NC_029988.1	188384036	188385551	+	1516	protein_coding	U-box domain-containing protein 27%2C transcript variant X1	-
107868059	419.89	519.04	282.144	76.5573	75.5307	56.895	407.025	69.661	2.5457	2.03189e-13	4.87312e-11	LOC107868059	NC_029980.1	162081951	162084530	-	2580	protein_coding	serine/threonine-protein kinase-like protein CCR4	Pkinase
107852374	2089.49	1435.74	2401.53	441.91	295.483	426.712	1975.59	388.035	2.34785	2.09483e-13	4.97481e-11	LOC107852374	NC_029977.1	5796471	5797846	+	917	protein_coding	protein LURP-one-related 4-like	-
107855482	2483.76	2832.18	2017.99	725.399	751.157	615.804	2444.64	697.453	1.80933	2.32402e-13	5.4415e-11	LOC107855482	NW_015961390.1	426325	429747	+	1890	protein_coding	S-adenosylmethionine decarboxylase proenzyme-like	SAM_decarbox
107856304	264.744	190.738	150.991	24.2558	21.5802	35.9777	202.158	27.2712	2.88919	2.33627e-13	5.4415e-11	LOC107856304	NW_015961630.1	630901	632107	-	1207	protein_coding	fatty acid desaturase 4%2C chloroplastic-like	-
107872867	14139.6	7613.35	11971.3	2254.27	2562.23	1946.14	11241.4	2254.22	2.31808	2.42278e-13	5.58925e-11	LOC107872867	NC_029982.1	35621581	35624499	+	2047	protein_coding	probable WRKY transcription factor 25	WRKY
107848283	8.54013	15.0279	6.61275	112.941	127.821	93.7093	10.0603	111.49	-3.46634	2.47209e-13	5.6492e-11	LOC107848283	NC_029987.1	189259949	189264324	+	4275	protein_coding	LRR receptor-like serine/threonine-protein kinase GSO1	Pkinase
107850736	6251.38	5369.57	8397.1	1535.69	1215.13	1766.25	6672.68	1505.69	2.14787	2.62052e-13	5.93241e-11	LOC107850736	NC_029988.1	171509043	171511133	+	864	protein_coding	protein DOWNSTREAM OF FLC-like	-
107842625	955.071	426.56	611.68	102.329	108.731	85.3424	664.437	98.8008	2.74849	2.67977e-13	6.01038e-11	LOC107842625	NC_029985.1	134447800	134450422	-	1978	protein_coding	U-box domain-containing protein 9-like	U-box
107848504	149.452	152.591	114.621	23.4978	18.2602	10.877	138.888	17.545	2.97843	2.93289e-13	6.51774e-11	LOC107848504	NC_029987.1	209346281	209348704	+	2424	protein_coding	U-box domain-containing protein 18-like	U-box
107878692	538.028	752.55	573.105	175.854	172.642	161.481	621.228	169.992	1.87002	3.36108e-13	7.40141e-11	LOC107878692	NC_029983.1	216698313	216700591	-	2279	protein_coding	uncharacterized LOC107878692	Methyltransf_11
107862455	78.2845	167.619	136.664	10.6119	9.96009	15.0604	127.522	11.8775	3.42953	3.58509e-13	7.82358e-11	LOC107862455	NC_029979.1	17341564	17343786	+	1093	protein_coding	two-component response regulator ARR5-like	Response_reg
107863712	66.8977	162.995	69.4339	0.757993	4.15004	1.67338	99.7754	2.1938	5.52606	3.64446e-13	7.88212e-11	LOC107863712	NC_029977.1	869103	870340	+	1238	protein_coding	uncharacterized LOC107863712	-
107855978	610.619	139.875	393.459	28.0457	23.2402	22.5906	381.318	24.6255	3.95086	4.67997e-13	1.00321e-10	LOC107855978	NW_015961507.1	1235324	1236739	-	1157	protein_coding	LEAF RUST 10 DISEASE-RESISTANCE LOCUS RECEPTOR-LIKE PROTEIN KINASE-like 2.1	-
107851382	751.532	1184.89	871.782	234.978	248.172	220.05	936.068	234.4	1.99808	5.76894e-13	1.2258e-10	LOC107851382	NC_029988.1	135054973	135057835	+	1243	protein_coding	probable tyrosine-protein phosphatase At1g05000%2C transcript variant X2	-
107870119	1530.11	1802.19	1893.45	585.928	639.936	558.073	1741.92	594.646	1.5509	5.84547e-13	1.23126e-10	LOC107870119	NC_029981.1	2879436	2888001	-	1448	protein_coding	neurofilament heavy polypeptide-like%2C transcript variant X2	-
107867688	1076.06	2137.43	1142.9	216.786	274.733	235.11	1452.13	242.209	2.58421	5.93667e-13	1.23969e-10	LOC107867688	NC_029980.1	50583625	50585211	+	1587	protein_coding	U-box domain-containing protein 27-like	U-box
107840951	372.919	507.48	542.246	105.361	131.971	104.586	474.215	113.973	2.05835	6.0471e-13	1.25196e-10	LOC107840951	NC_029977.1	184972962	184977051	+	2903	protein_coding	uncharacterized LOC107840951	Lipase_3
107859478	3111.45	5086.36	6458.46	933.089	1002.65	804.06	4885.42	913.266	2.4195	7.95727e-13	1.63346e-10	LOC107859478	NC_029978.1	138958588	138962660	+	1926	protein_coding	sugar carrier protein C	Sugar_tr
107856318	347.299	765.266	299.778	60.6394	48.1404	39.3245	470.781	49.3681	3.25265	8.92511e-13	1.81675e-10	LOC107856318	NW_015961630.1	787713	789191	-	708	protein_coding	protein translation factor SUI1 homolog%2C transcript variant X2	SUI1
107870135	98.2115	83.2313	160.91	11.3699	8.30008	13.387	114.118	11.019	3.37417	9.04363e-13	1.82553e-10	LOC107870135	NC_029981.1	3638925	3643260	-	1395	protein_coding	glutamine synthetase cytosolic isozyme 1-1	-
107848267	226.313	128.315	240.263	19.7078	33.2003	18.4072	198.297	23.7718	3.06131	1.20418e-12	2.41064e-10	LOC107848267	NC_029987.1	21000601	21003245	-	1008	protein_coding	LOB domain-containing protein 1-like	-
107843722	146.606	354.889	126.744	15.1599	14.1101	5.02014	209.413	11.43	4.19201	1.26275e-12	2.50717e-10	LOC107843722	NC_029986.1	197309941	197310963	+	1023	pseudogene	-	-
107861978	414.196	753.706	512.489	103.845	123.671	86.1791	560.13	104.565	2.42201	1.45113e-12	2.85779e-10	LOC107861978	NC_029979.1	6501228	6503455	-	1503	protein_coding	probable WRKY transcription factor 40	WRKY
107848092	3675.1	2080.78	2555.83	657.938	669.816	550.542	2770.57	626.099	2.14543	1.53231e-12	2.99333e-10	LOC107848092	NC_029987.1	183027807	183031679	+	1961	protein_coding	protein kinase 2B%2C chloroplastic-like	Pkinase_Tyr
107874647	2009.78	568.747	774.794	92.4751	83.0008	111.28	1117.77	95.5852	3.54723	1.75995e-12	3.4105e-10	LOC107874647	NC_029982.1	8435129	8436312	+	1184	protein_coding	zinc finger protein ZAT5-like	-
107858500	14.2336	24.2758	13.2255	147.809	141.931	107.933	17.245	132.558	-2.9373	2.1909e-12	4.21192e-10	LOC107858500	NC_029978.1	53806111	53809244	-	1030	protein_coding	homeobox-leucine zipper protein ATHB-40-like	Homeobox
107860292	244.817	1602.2	357.089	18.1918	34.8603	13.387	734.703	22.1464	5.05286	2.27784e-12	4.34458e-10	LOC107860292	NC_029978.1	155569353	155570737	-	1385	protein_coding	mitogen-activated protein kinase kinase kinase 3-like	Pkinase
107856247	101.058	94.7912	77.1488	9.8539	9.13008	2.51007	90.9994	7.16469	3.65694	2.37331e-12	4.49131e-10	LOC107856247	NC_029977.1	166784546	166786116	+	1571	protein_coding	probable magnesium transporter NIPA8	DUF803
novel.4375	34.1605	277.438	146.583	3.03197	0.830008	1.67338	152.727	1.84512	6.3576	2.66152e-12	4.99768e-10	-	NC_029985.1	1283440	1285208	+	1716	-	-	-
107859582	1121.6	1444.99	1110.94	3883.2	3479.39	3608.65	1225.84	3657.08	-1.57675	2.69065e-12	5.0135e-10	LOC107859582	NC_029978.1	141592022	141593180	-	1159	protein_coding	uncharacterized LOC107859582	-
107860333	586.422	360.669	962.156	71.2513	83.8308	95.3827	636.416	83.4883	2.93113	2.9083e-12	5.37769e-10	LOC107860333	NC_029978.1	156303399	156306824	+	2107	protein_coding	L-ascorbate oxidase homolog	-
107868293	78.2845	142.187	158.706	13.6439	16.6002	15.0604	126.392	15.1015	3.07024	2.93278e-12	5.38187e-10	LOC107868293	NC_029977.1	13597967	13600829	+	1067	protein_coding	uncharacterized LOC107868293	-
107865289	902.407	1750.17	686.624	162.21	166.002	125.504	1113.07	151.239	2.87959	3.58058e-12	6.52123e-10	LOC107865289	NC_029977.1	4225631	4227904	+	2274	protein_coding	BTB/POZ domain-containing protein At5g41330-like	K_tetra
107839364	1911.57	1929.35	1681.84	718.577	613.376	708.677	1840.92	680.21	1.43616	4.74251e-12	8.57298e-10	LOC107839364	NC_029984.1	125805340	125808344	+	1036	protein_coding	uncharacterized LOC107839364	-
107851768	113.868	127.159	100.293	24.2558	15.7701	16.7338	113.774	18.9199	2.58325	5.41015e-12	9.7074e-10	LOC107851768	NC_029977.1	300770044	300772401	-	2358	protein_coding	ethylene-responsive transcription factor ERF061	AP2
107863537	172.226	122.535	272.225	28.8037	15.7701	15.8971	188.995	20.157	3.22545	6.38646e-12	1.13749e-09	LOC107863537	NC_029977.1	297294	299482	+	1048	protein_coding	soluble inorganic pyrophosphatase PPA1-like	Pyrophosphatase
107871476	145.182	464.708	213.812	19.7078	30.7103	20.0806	274.568	23.4996	3.54861	8.5057e-12	1.50389e-09	LOC107871476	NC_029981.1	217053609	217056427	-	1398	protein_coding	uncharacterized LOC107871476	-
107866788	841.203	865.837	795.735	238.01	306.273	208.336	834.258	250.873	1.73358	9.96463e-12	1.74908e-09	LOC107866788	NC_029980.1	833682	839335	+	1843	protein_coding	probable serine/threonine-protein kinase NAK%2C transcript variant X2	Pkinase_Tyr
107860522	1030.51	5664.35	1267.44	137.955	151.061	72.7921	2654.1	120.603	4.4598	1.03588e-11	1.80519e-09	LOC107860522	NC_029978.1	159600637	159601531	-	895	protein_coding	probable calcium-binding protein CML30	-
107878485	287.518	142.187	252.387	36.3836	34.0303	40.9978	227.364	37.1373	2.61292	1.08527e-11	1.87775e-09	LOC107878485	NC_029983.1	209561428	209562733	+	1110	pseudogene	-	-
107876044	55.5109	70.5154	74.9446	6.82193	3.32003	7.53022	66.9903	5.89073	3.50705	1.10255e-11	1.89413e-09	LOC107876044	NC_029982.1	20959504	20961512	+	2009	protein_coding	RING-H2 finger protein ATL3-like	-
107854189	119.562	82.0753	45.1872	6.06394	4.15004	3.34676	82.2748	4.52025	4.17357	1.15533e-11	1.97082e-09	LOC107854189	NW_015961113.1	1090	1944	+	855	protein_coding	putative germin-like protein 9-2	-
107838978	93.9415	122.535	85.9658	332.001	420.814	435.916	100.814	396.243	-1.97372	1.25511e-11	2.12606e-09	LOC107838978	NC_029984.1	76336924	76340858	-	2385	protein_coding	heat shock factor protein HSF30%2C transcript variant X6	HSF_DNA-bind
107873497	2069.56	2594.04	2040.03	805.746	818.387	722.064	2234.55	782.066	1.51466	1.26442e-11	2.12694e-09	LOC107873497	NC_029982.1	193948249	193950184	+	1906	protein_coding	E3 ubiquitin-protein ligase RING1	-
107843441	1905.87	1280.84	1698.38	472.229	446.544	530.462	1628.36	483.078	1.75287	1.43378e-11	2.3952e-09	LOC107843441	NC_029986.1	169166805	169168032	-	1228	protein_coding	abscisic acid receptor PYL4-like	-
107867137	1599.85	1599.89	1598.08	4225.05	4960.96	3786.02	1599.27	4324.01	-1.43495	1.93035e-11	3.20267e-09	LOC107867137	NC_029980.1	8369114	8383811	+	2980	protein_coding	patatin-like protein 2%2C transcript variant X1	-
107875527	1384.92	369.917	1514.32	91.7171	109.561	93.7093	1089.72	98.3292	3.47019	1.95586e-11	3.22292e-09	LOC107875527	NC_029982.1	5953694	5956976	+	1163	protein_coding	uncharacterized protein C24B11.05%2C transcript variant X1	-
107848201	266.167	507.48	497.059	78.0732	87.1508	56.895	423.569	74.0397	2.51715	2.0978e-11	3.43345e-09	LOC107848201	NC_029987.1	25010939	25013609	-	1302	protein_coding	dof zinc finger protein DOF2.1-like	zf-Dof
107865779	367.226	406.909	644.744	70.4933	85.4908	34.3043	472.959	63.4295	2.89851	2.2875e-11	3.7188e-09	LOC107865779	NC_029979.1	260986016	260989099	+	3084	protein_coding	putative calcium-transporting ATPase 13%2C plasma membrane-type	Hydrolase
107859455	226.313	252.006	286.553	56.0915	77.1907	50.2014	254.957	61.1612	2.06116	2.3551e-11	3.80317e-09	LOC107859455	NC_029978.1	138200087	138201983	+	1437	protein_coding	uncharacterized LOC107859455	-
107871400	14.2336	9.24792	13.2255	93.9911	83.8308	84.5058	12.2357	87.4425	-2.84572	2.86136e-11	4.59011e-09	LOC107871400	NC_029981.1	216001000	216009012	+	2135	protein_coding	probable aminopyrimidine aminohydrolase%2C mitochondrial%2C transcript variant X1	-
107845575	5007.36	2811.37	3031.95	790.586	908.858	612.458	3616.89	770.634	2.23043	3.54577e-11	5.6506e-09	LOC107845575	NC_029986.1	18884540	18885790	-	1251	protein_coding	ethylene-responsive transcription factor 4-like	AP2
107874722	176.496	480.892	259	35.6257	45.6504	32.6309	305.463	37.969	3.00955	3.61501e-11	5.72329e-09	LOC107874722	NC_029982.1	16388125	16389162	-	929	protein_coding	uncharacterized LOC107874722	-
107840125	318.832	593.023	339.455	81.8632	91.3008	73.6288	417.103	82.2643	2.34274	4.50944e-11	7.093e-09	LOC107840125	NC_029984.1	141947299	141950538	+	2163	protein_coding	glutamyl-tRNA reductase 1%2C chloroplastic-like	-
novel.274	261.897	220.794	144.378	19.7078	42.3304	24.264	209.023	28.7674	2.86209	4.62132e-11	7.22208e-09	-	NC_029977.1	215127717	215130515	+	1163	-	PF03107:C1 domain	-
107855963	2738.54	4251.73	2854.51	944.459	968.619	961.357	3281.59	958.145	1.77619	5.26631e-11	8.1773e-09	LOC107855963	NW_015961507.1	1263908	1276050	-	7453	protein_coding	glutamate synthase 1 [NADH]%2C chloroplastic	Pyr_redox_2
107875448	69.7444	67.0474	33.0638	296.375	286.353	286.985	56.6185	289.904	-2.36322	5.41061e-11	8.34785e-09	LOC107875448	NC_029982.1	4305906	4310363	-	3405	protein_coding	cation/H(+) antiporter 14%2C transcript variant X2	Na_H_Exchanger
107867436	422.737	557.187	715.28	106.119	76.3607	143.074	565.068	108.518	2.38141	5.47368e-11	8.3917e-09	LOC107867436	NC_029980.1	22299245	22300048	-	804	protein_coding	classical arabinogalactan protein 5	-
107878499	1558.57	653.134	1524.24	135.681	112.051	230.09	1245.32	159.274	2.96706	6.41104e-11	9.76696e-09	LOC107878499	NC_029983.1	209921984	209925831	+	1791	protein_coding	glycerol-3-phosphate acyltransferase 1	Acyltransferase
107878078	1439.01	1245	1267.44	553.335	509.625	476.077	1317.15	513.012	1.35986	6.48062e-11	9.81125e-09	LOC107878078	NC_029983.1	157126922	157141014	-	1494	protein_coding	uncharacterized oxidoreductase At1g06690%2C chloroplastic	Aldo_ket_red
107863484	159.416	52.0196	239.161	10.6119	9.13008	7.53022	150.199	9.09073	4.04434	7.87046e-11	1.18414e-08	LOC107863484	NC_029979.1	93204542	93207394	+	1037	protein_coding	probable WRKY transcription factor 70	WRKY
107855287	199.27	345.641	221.527	57.6074	53.9505	41.8345	255.479	51.1308	2.32106	8.0966e-11	1.21064e-08	LOC107855287	NW_015961387.1	559836	560906	-	1071	protein_coding	uncharacterized LOC107855287	-
novel.6969	42.7007	30.0557	50.6978	192.53	170.152	183.235	41.1514	181.972	-2.14444	9.44652e-11	1.39921e-08	-	NW_015961388.1	1479532	1482052	+	2094	-	-	-
107840306	2139.3	2481.91	1605.8	6968.98	7044.27	6064.33	2075.67	6692.53	-1.68908	9.47325e-11	1.39921e-08	LOC107840306	NC_029984.1	146321854	146329042	+	1604	protein_coding	serine carboxypeptidase-like 26	Peptidase_S10
107840265	1402	1974.43	1299.41	449.49	490.534	480.26	1558.61	473.428	1.71923	9.80927e-11	1.44006e-08	LOC107840265	NC_029984.1	145652627	145654375	-	1749	protein_coding	U-box domain-containing protein 26-like	U-box
107860215	116.715	160.683	163.115	34.8677	35.6903	29.2842	146.837	33.2807	2.14351	1.06487e-10	1.55388e-08	LOC107860215	NC_029978.1	153944842	153946579	+	1738	protein_coding	uncharacterized LOC107860215	-
107855199	91.0947	94.7912	81.5573	2.27398	12.4501	4.18345	89.1477	6.30251	3.83293	1.07579e-10	1.56041e-08	LOC107855199	NW_015961357.1	154266	155382	+	948	protein_coding	G-type lectin S-receptor-like serine/threonine-protein kinase RLK1	Pkinase
107873690	17.0803	30.0557	31.9616	139.471	132.801	137.217	26.3659	136.496	-2.35635	1.09351e-10	1.57668e-08	LOC107873690	NC_029982.1	217149909	217151497	+	1436	protein_coding	uncharacterized LOC107873690	Retrotrans_gag
107862193	212.08	99.4152	203.893	21.9818	23.2402	9.2036	171.796	18.1419	3.23996	1.19153e-10	1.70784e-08	LOC107862193	NC_029979.1	10636916	10640610	+	1860	protein_coding	protein SAR DEFICIENT 1-like	-
107859259	434.123	391.881	817.777	105.361	110.391	88.6892	547.927	101.48	2.43334	1.34891e-10	1.92203e-08	LOC107859259	NC_029978.1	131988840	131992168	-	1233	protein_coding	rho-N domain-containing protein 1%2C chloroplastic	-
107842902	1271.06	1049.64	1758.99	400.978	369.353	378.184	1359.9	382.839	1.82882	1.4114e-10	1.99835e-08	LOC107842902	NC_029985.1	210960391	210965177	+	1136	protein_coding	soluble inorganic pyrophosphatase 4%2C transcript variant X3	Pyrophosphatase
107840615	1222.66	2159.39	1744.67	485.873	361.883	303.719	1708.91	383.825	2.15451	1.41896e-10	1.99835e-08	LOC107840615	NC_029984.1	152306708	152308564	+	992	protein_coding	expansin-like A1	-
107859607	640.51	1301.64	678.91	159.178	192.562	132.197	873.688	161.312	2.43757	1.61903e-10	2.26692e-08	LOC107859607	NC_029978.1	142213390	142216280	-	2026	protein_coding	probable WRKY transcription factor 31%2C transcript variant X1	WRKY
107859493	873.94	1208.01	881.701	316.083	242.362	321.289	987.884	293.245	1.75231	1.85946e-10	2.5886e-08	LOC107859493	NC_029978.1	139202382	139205676	-	1419	protein_coding	uncharacterized LOC107859493	-
107862179	39.8539	120.223	126.744	8.33792	4.98005	5.02014	95.6071	6.1127	3.96477	1.89764e-10	2.62666e-08	LOC107862179	NC_029979.1	10280837	10282571	+	1192	protein_coding	myb-related protein 340-like	Myb_DNA-binding
107871089	603.503	914.388	988.607	238.768	243.192	203.316	835.499	228.425	1.87157	1.99738e-10	2.749e-08	LOC107871089	NC_029981.1	191290966	191295125	-	1308	protein_coding	probable sugar phosphate/phosphate translocator At3g11320	-
107863790	237.7	768.733	257.897	35.6257	24.9002	50.2014	421.444	36.9091	3.51408	2.03792e-10	2.78895e-08	LOC107863790	NC_029979.1	195468819	195469606	-	788	protein_coding	uncharacterized LOC107863790	-
107842605	1373.54	1936.28	774.794	222.092	210.822	97.8928	1361.54	176.936	2.94351	2.20299e-10	2.99792e-08	LOC107842605	NC_029985.1	129708273	129712911	+	2188	protein_coding	probable WRKY transcription factor 26	WRKY
107868098	1528.68	932.884	1077.88	324.421	323.703	363.96	1179.82	337.361	1.80569	2.56321e-10	3.46864e-08	LOC107868098	NC_029980.1	176638269	176641770	-	2016	protein_coding	cyclic dof factor 1-like	zf-Dof
107867465	399.963	138.719	180.749	28.0457	32.3703	19.2439	239.81	26.5533	3.17212	3.00497e-10	4.02902e-08	LOC107867465	NC_029980.1	24492876	24494057	-	1182	protein_coding	protein EXORDIUM-like	-
107868548	2425.4	3393.99	3769.27	1048.3	1039.17	998.172	3196.22	1028.55	1.63597	3.01058e-10	4.02902e-08	LOC107868548	NC_029980.1	5264477	5269183	-	1635	protein_coding	uncharacterized sugar kinase slr0537	PfkB
107842801	109.598	198.83	243.57	25.0138	35.6903	21.754	183.999	27.486	2.74611	3.45317e-10	4.59595e-08	LOC107842801	NC_029985.1	186947655	186951748	+	2486	protein_coding	uncharacterized protein At1g04910	-
107847747	1352.19	1357.13	1449.3	541.965	613.376	481.934	1386.21	545.758	1.34489	3.53072e-10	4.67348e-08	LOC107847747	NC_029977.1	256541460	256545673	+	1724	protein_coding	monoglyceride lipase	-
107872932	38.4306	156.059	29.7574	0	0	0	74.7489	0	8.97653	3.60636e-10	4.74765e-08	LOC107872932	NC_029982.1	41174095	41176028	+	1934	protein_coding	phospholipase A1-Ibeta2%2C chloroplastic-like	Lipase_3
novel.5987	15.6569	19.6518	11.0213	138.713	79.6807	113.79	15.4433	110.728	-2.84601	4.33102e-10	5.67083e-08	-	NC_029988.1	174423391	174425280	+	1861	-	-	-
107872948	105.328	123.691	153.195	26.5297	32.3703	22.5906	127.405	27.1636	2.23238	4.62832e-10	6.02752e-08	LOC107872948	NC_029982.1	43050242	43051592	-	1351	protein_coding	zinc finger protein ZAT1	-
107878210	72.5911	108.663	68.3318	407.8	450.694	277.781	83.1953	378.758	-2.18538	4.81592e-10	6.23829e-08	LOC107878210	NC_029983.1	177214276	177224526	-	2536	protein_coding	cellulose synthase-like protein H1	-
107865833	58.3576	109.819	130.051	0.757993	8.30008	0.836691	99.4092	3.29825	4.92875	5.15038e-10	6.63604e-08	LOC107865833	NC_029979.1	5307200	5307946	+	747	protein_coding	protein NIM1-INTERACTING 2-like	-
107854835	170.803	809.193	202.791	30.3197	28.2203	20.0806	394.262	26.2068	3.91091	5.48876e-10	7.03461e-08	LOC107854835	NW_015961260.1	1677	2406	-	730	protein_coding	uncharacterized LOC107854835	-
107843851	136.642	394.193	465.097	28.0457	40.6704	12.5504	331.977	27.0888	3.61601	5.53488e-10	7.05639e-08	LOC107843851	NC_029986.1	201382842	201385085	+	1299	protein_coding	probable calcium-binding protein CML49	-
107839145	690.327	776.825	704.258	308.503	249.002	277.781	723.804	278.429	1.37812	5.76627e-10	7.31289e-08	LOC107839145	NC_029977.1	168267135	168271292	+	2731	protein_coding	uncharacterized LOC107839145	-
107879219	465.437	1169.86	930.194	140.987	181.772	127.177	855.164	149.978	2.51214	5.80161e-10	7.31939e-08	LOC107879219	NC_029977.1	149058842	149064350	+	1158	protein_coding	protein DEHYDRATION-INDUCED 19 homolog 4	-
107839591	209.233	902.828	249.08	22.7398	43.9904	15.0604	453.714	27.2635	4.05766	5.9432e-10	7.45918e-08	LOC107839591	NC_029984.1	131651287	131652390	+	1104	protein_coding	protein SRC2-like	C2
107856850	79.7079	145.655	121.234	15.9178	24.0702	16.7338	115.532	18.9073	2.61629	6.07049e-10	7.57967e-08	LOC107856850	NC_029977.1	187416929	187418335	-	1407	protein_coding	protein FANTASTIC FOUR 3-like	-
107842110	34.1605	92.4792	133.357	6.06394	4.98005	5.02014	86.6657	5.35471	4.01861	6.20421e-10	7.7069e-08	LOC107842110	NC_029985.1	186408470	186410108	+	1639	protein_coding	arogenate dehydrogenase 2%2C chloroplastic-like	-
107860246	832.663	830.001	688.829	323.663	299.633	294.515	783.831	305.937	1.35669	6.30034e-10	7.78639e-08	LOC107860246	NC_029978.1	154541403	154543528	+	2126	protein_coding	F-box protein At1g47056	-
107840891	253.357	811.505	806.756	76.5573	93.7909	66.9352	623.873	79.0945	2.98047	6.67563e-10	8.18926e-08	LOC107840891	NC_029985.1	5547627	5549935	-	1364	protein_coding	protein TIFY 10A	Zim
107854330	75.4378	378.009	51.7999	5.30595	4.98005	0.836691	168.416	3.70756	5.49914	6.69394e-10	8.18926e-08	LOC107854330	NC_029977.1	45807159	45807916	+	758	protein_coding	BON1-associated protein 2-like	C2
107850887	1043.32	1100.5	1315.94	429.024	476.424	399.101	1153.25	434.85	1.4075	6.89181e-10	8.38896e-08	LOC107850887	NC_029988.1	181339709	181342549	-	2394	protein_coding	trihelix transcription factor GT-2-like	-
107840532	770.035	451.992	1027.18	158.42	147.741	167.338	749.736	157.833	2.24807	7.57553e-10	9.15381e-08	LOC107840532	NC_029984.1	150746646	150751615	+	1877	protein_coding	probable magnesium transporter NIPA6%2C transcript variant X1	DUF803
107859432	1246.86	1643.82	1018.36	361.563	437.414	339.696	1303.01	379.558	1.77952	7.59574e-10	9.15381e-08	LOC107859432	NC_029978.1	137659110	137663014	+	1672	protein_coding	PAP-specific phosphatase HAL2-like	-
107840383	35.5839	233.51	150.991	7.57993	8.30008	5.02014	140.028	6.96672	4.32999	9.0017e-10	1.07945e-07	LOC107840383	NC_029977.1	179168463	179172983	-	1515	protein_coding	gibberellin 2-beta-dioxygenase 2	2OG-FeII_Oxy
107875554	291.788	95.9472	580.82	24.2558	27.3902	16.7338	322.852	22.7933	3.82412	9.70912e-10	1.15854e-07	LOC107875554	NC_029982.1	6643981	6647412	-	1828	protein_coding	protein UPSTREAM OF FLC-like	-
107842860	4684.26	3182.44	4232.16	1470.51	1395.24	1177.22	4032.96	1347.66	1.58123	1.09219e-09	1.29686e-07	LOC107842860	NC_029985.1	200769053	200771437	+	1847	protein_coding	uncharacterized LOC107842860%2C transcript variant X1	-
107840187	256.204	143.343	207.2	51.5435	34.8603	41.8345	202.249	42.7461	2.23882	1.14651e-09	1.35473e-07	LOC107840187	NC_029984.1	143594386	143595648	+	1151	protein_coding	LOB domain-containing protein 37-like	-
107839819	1088.87	1265.81	1043.71	409.316	309.593	440.099	1132.8	386.336	1.55193	1.19292e-09	1.40272e-07	LOC107839819	NC_029984.1	136125835	136132004	+	2204	protein_coding	uncharacterized LOC107839819	-
107842290	237.7	187.27	249.08	72.7673	65.5706	70.282	224.684	69.54	1.69122	1.27508e-09	1.49209e-07	LOC107842290	NC_029985.1	25215104	25216501	-	1398	protein_coding	ethylene-responsive transcription factor 4-like	AP2
107853014	81.1313	134.095	162.012	15.9178	21.5802	7.53022	125.746	15.0094	3.06797	1.28771e-09	1.49963e-07	LOC107853014	NW_015960697.1	611311	614194	-	1248	protein_coding	F-box protein At1g61340-like	-
107855583	93.9415	43.9276	113.519	7.57993	4.98005	0.836691	83.796	4.46555	4.21588	1.45297e-09	1.68399e-07	LOC107855583	NW_015961414.1	1495559	1498130	+	917	protein_coding	probable WRKY transcription factor 51	WRKY
107878221	1249.71	1372.16	1656.5	543.481	439.074	549.706	1426.12	510.753	1.48164	1.46505e-09	1.6899e-07	LOC107878221	NC_029983.1	182287395	182291854	-	1984	protein_coding	probable beta-1%2C3-galactosyltransferase 2%2C transcript variant X2	Galactosyl_T
107867437	1689.52	2221.81	1788.75	748.897	743.687	759.715	1900.03	750.766	1.33978	1.48715e-09	1.70726e-07	LOC107867437	NC_029977.1	9635464	9640473	-	2125	protein_coding	protein NRT1/ PTR FAMILY 6.3-like	-
107842069	11396.8	4463.28	7274.03	1396.22	1592.78	1654.14	7711.37	1547.71	2.31679	1.4972e-09	1.71069e-07	LOC107842069	NC_029985.1	18322617	18326000	-	2151	protein_coding	protein NRT1/ PTR FAMILY 6.4-like	-
107866028	42.7007	43.9276	84.8637	3.78996	0.830008	0	57.164	1.53999	5.17293	1.68238e-09	1.91325e-07	LOC107866028	NC_029979.1	27994073	27995054	+	982	protein_coding	miraculin-like	-
107878850	2253.17	3147.76	1919.9	7620.1	8549.91	7249.09	2440.28	7806.37	-1.67757	1.80593e-09	2.04416e-07	LOC107878850	NC_029983.1	220194953	220198027	+	1483	protein_coding	probable amino acid permease 7	Aa_trans
107849632	41.2773	80.9193	29.7574	1.51599	1.66002	0.836691	50.6513	1.33756	5.23866	1.9447e-09	2.19099e-07	LOC107849632	NC_029988.1	211950808	211951900	+	1093	protein_coding	uncharacterized LOC107849632	-
107855040	102.482	105.195	101.396	19.7078	26.5602	12.5504	103.024	19.6061	2.39311	2.05708e-09	2.30688e-07	LOC107855040	NW_015961318.1	889799	892216	-	2418	protein_coding	ethylene-responsive transcription factor ERF054	AP2
107866090	76.8612	860.057	130.051	9.8539	3.32003	14.2237	355.656	9.13256	5.28359	2.36765e-09	2.64293e-07	LOC107866090	NC_029979.1	36545225	36545918	-	694	protein_coding	uncharacterized LOC107866090	-
novel.2437	44.124	73.9834	41.8808	5.30595	2.49002	0.836691	53.3294	2.87755	4.19082	2.43006e-09	2.70016e-07	-	NC_029980.1	204764772	204766225	-	1454	-	-	-
107861269	61.2043	50.8636	41.8808	169.79	186.752	233.437	51.3162	196.66	-1.94439	2.45372e-09	2.71399e-07	LOC107861269	NC_029978.1	142491179	142493423	+	904	protein_coding	uncharacterized LOC107861269	-
novel.6720	11.3868	0	9.91913	93.9911	118.691	107.096	7.10199	106.593	-3.93047	2.52207e-09	2.76708e-07	-	NW_015960988.1	545899	547954	-	2056	-	-	-
107843579	1912.99	975.656	1947.46	387.334	381.803	411.652	1612.03	393.597	2.03397	2.53009e-09	2.76708e-07	LOC107843579	NC_029986.1	188497838	188500500	+	1691	protein_coding	S-adenosylmethionine synthase 3-like	-
107878289	1296.68	3559.29	1484.56	381.27	341.963	247.66	2113.51	323.631	2.70721	2.53598e-09	2.76708e-07	LOC107878289	NC_029983.1	191419127	191419937	-	811	protein_coding	calcium-binding protein PBP1-like	-
107870702	207.81	26.5878	109.11	4.54796	4.98005	5.02014	114.503	4.84938	4.55969	2.57138e-09	2.79312e-07	LOC107870702	NC_029981.1	81676707	81681839	+	1696	protein_coding	uncharacterized LOC107870702	-
107859228	486.788	561.811	627.11	173.58	210.822	137.217	558.569	173.873	1.68426	2.58989e-09	2.80067e-07	LOC107859228	NC_029978.1	130587036	130594982	+	2203	protein_coding	MACPF domain-containing protein CAD1	-
107840185	434.123	1443.83	426.523	93.2331	95.4509	65.2619	768.159	84.6486	3.18189	2.95262e-09	3.17872e-07	LOC107840185	NC_029984.1	143514945	143516071	+	1127	protein_coding	zinc finger protein ZAT6-like	-
107840021	468.284	799.945	1005.14	188.74	131.141	175.705	757.789	165.195	2.19812	2.98374e-09	3.19801e-07	LOC107840021	NC_029984.1	139797220	139800011	-	929	protein_coding	non-specific lipid-transfer protein-like protein At2g13820	-
107874660	45.5474	194.206	60.6169	2.27398	2.49002	7.53022	100.124	4.09807	4.62087	3.08188e-09	3.28865e-07	LOC107874660	NC_029982.1	10341009	10341859	+	851	protein_coding	putative calcium-binding protein CML19	-
107875427	214.927	317.897	434.238	82.6212	70.5506	56.895	322.354	70.0223	2.20348	3.24312e-09	3.44553e-07	LOC107875427	NC_029982.1	3884173	3886764	-	1461	protein_coding	dof zinc finger protein DOF2.1-like	zf-Dof
novel.444	69.7444	35.8357	41.8808	219.06	190.072	270.251	49.1536	226.461	-2.21421	3.37672e-09	3.56913e-07	-	NC_029977.1	28326345	28329318	-	2974	-	PF13921:Myb-like DNA-binding domain	-
107844754	352.992	740.99	541.144	82.6212	134.461	60.2417	545.042	92.4414	2.56058	3.38893e-09	3.56913e-07	LOC107844754	NC_029986.1	114425387	114427318	+	1364	protein_coding	NAC domain-containing protein 67	NAM
107879974	271.861	524.82	208.302	56.8495	65.5706	51.8748	334.994	58.0983	2.52795	3.45361e-09	3.61111e-07	LOC107879974	NC_029984.1	146363947	146365239	+	1293	protein_coding	uncharacterized LOC107879974	-
novel.822	41.2773	21.9638	49.5957	177.37	167.662	215.866	37.6123	186.966	-2.31414	3.4586e-09	3.61111e-07	-	NC_029978.1	94565335	94568070	+	2516	-	-	-
107865812	51.2408	240.446	95.8849	6.82193	8.30008	11.7137	129.191	8.94523	3.85725	3.73134e-09	3.87915e-07	LOC107865812	NC_029979.1	3881849	3882620	+	772	protein_coding	uncharacterized LOC107865812	-
107840549	3408.94	1420.71	1970.6	289.553	526.225	416.672	2266.75	410.817	2.46401	3.76922e-09	3.90178e-07	LOC107840549	NC_029984.1	151058664	151062811	-	2001	protein_coding	protein NUCLEAR FUSION DEFECTIVE 4	-
107871041	304.598	236.978	285.451	80.3472	82.1707	103.75	275.676	88.7559	1.63496	3.94365e-09	4.06498e-07	LOC107871041	NC_029981.1	178356011	178358414	-	2404	protein_coding	U-box domain-containing protein 30-like	U-box
107874725	41.2773	273.97	241.366	14.4019	10.7901	8.36691	185.538	11.1863	4.0512	3.98631e-09	4.09154e-07	LOC107874725	NC_029982.1	16598321	16600524	-	1565	protein_coding	uncharacterized LOC107874725	-
107855492	1736.49	1317.83	1163.84	520.741	473.104	488.627	1406.06	494.158	1.50801	4.04449e-09	4.13374e-07	LOC107855492	NW_015961390.1	349702	352884	+	2699	protein_coding	xyloglucan glycosyltransferase 4	-
107873463	469.707	350.265	423.216	120.521	152.721	148.094	414.396	140.445	1.56089	4.13892e-09	4.21248e-07	LOC107873463	NC_029982.1	186838984	186842725	+	2167	protein_coding	uncharacterized LOC107873463	-
107875948	660.437	774.513	769.284	309.261	295.483	323.799	734.745	309.514	1.24785	4.48463e-09	4.54524e-07	LOC107875948	NC_029982.1	17546563	17553959	-	2061	protein_coding	probable aldehyde dehydrogenase	Aldedh
107840889	37.0072	132.939	54.0042	0	0	3.34676	74.6501	1.11559	6.09988	4.56074e-09	4.60312e-07	LOC107840889	NC_029985.1	5529652	5531261	+	1610	protein_coding	uncharacterized LOC107840889	AP2
107875073	259.051	283.218	182.953	724.641	960.319	719.554	241.74	801.505	-1.73018	4.80192e-09	4.82643e-07	LOC107875073	NC_029977.1	61269116	61277419	-	2282	protein_coding	metal tolerance protein 4-like%2C transcript variant X1	-
107850860	612.043	1008.02	889.416	249.38	285.523	234.273	836.494	256.392	1.70676	5.09703e-09	5.10187e-07	LOC107850860	NC_029988.1	229341118	229344928	-	2298	protein_coding	scarecrow-like protein 13	GRAS
107878295	1157.19	780.293	1321.45	368.384	298.803	276.108	1086.31	314.432	1.78828	5.48951e-09	5.47211e-07	LOC107878295	NC_029983.1	191773161	191774866	+	1414	protein_coding	zinc finger protein CONSTANS-like%2C transcript variant X1	zf-B_box
107839540	340.182	373.385	371.416	137.197	152.721	147.258	361.661	145.725	1.31241	5.77413e-09	5.73225e-07	LOC107839540	NC_029984.1	130697385	130702849	-	2230	protein_coding	cation/calcium exchanger 5	Na_Ca_ex
107870994	1466.06	1086.63	1377.66	531.353	443.224	509.545	1310.11	494.707	1.40467	5.88394e-09	5.81741e-07	LOC107870994	NC_029981.1	175253380	175258889	-	1968	protein_coding	inositol-3-phosphate synthase-like	-
107865607	34.1605	55.4875	37.4723	156.146	198.372	158.971	42.3734	171.163	-2.00889	6.29965e-09	6.2031e-07	LOC107865607	NC_029979.1	244435524	244445360	+	1504	protein_coding	F-box protein CPR30-like	F-box
107863145	129.525	379.165	250.183	45.4796	24.0702	36.8144	252.958	35.4547	2.83484	6.43407e-09	6.30982e-07	LOC107863145	NC_029979.1	43282947	43290123	+	1436	protein_coding	probable trehalose-phosphate phosphatase 2%2C transcript variant X1	-
novel.4671	915.217	2492.31	934.603	206.174	274.733	163.155	1447.38	214.687	2.75331	7.44156e-09	7.26843e-07	-	NC_029985.1	28910630	28913396	-	904	-	-	-
107846916	12.8102	149.123	35.268	0	0	0	65.7337	0	8.79185	8.00213e-09	7.78457e-07	LOC107846916	NC_029987.1	32248088	32248939	+	852	protein_coding	zinc finger protein ZAT11-like	-
107862270	1127.3	1194.14	1020.57	510.887	507.135	471.893	1114	496.638	1.16529	8.41258e-09	8.15111e-07	LOC107862270	NC_029979.1	12286820	12295426	+	2126	protein_coding	LON peptidase N-terminal domain and RING finger protein 1	-
novel.3284	27.0438	25.4318	38.5744	0	0	0	30.35	0	7.67719	8.47481e-09	8.17869e-07	-	NC_029982.1	6260889	6262892	-	2004	-	-	-
novel.2130	68.3211	40.4597	54.0042	223.608	172.642	217.54	54.2616	204.596	-1.92172	8.65837e-09	8.32269e-07	-	NC_029980.1	90386581	90390154	+	3574	-	-	-
107862353	86.8247	62.4235	103.6	16.6758	13.2801	17.5705	84.2827	15.8422	2.41106	9.14892e-09	8.75946e-07	LOC107862353	NC_029979.1	14845784	14847756	+	1973	protein_coding	UDP-glycosyltransferase 89B2-like	UDPGT
novel.2275	102.482	76.2954	79.3531	240.284	268.922	327.983	86.0433	279.063	-1.70154	9.3619e-09	8.92809e-07	-	NC_029980.1	18696393	18701202	-	4810	-	PF08284:Retroviral aspartyl protease|PF00078:Reverse transcriptase (RNA-dependent DNA polymerase)	RVT_1
novel.1964	5.69342	1.15599	7.71488	50.0275	62.2506	64.4252	4.85476	58.9011	-3.6023	9.60767e-09	9.12654e-07	-	NC_029979.1	252873524	252892085	-	878	-	-	-
107852363	157.992	109.819	364.804	31.0777	21.5802	25.9374	210.872	26.1984	3.00894	9.70463e-09	9.18262e-07	LOC107852363	NW_015960478.1	27218	29531	-	1463	protein_coding	probable trehalose-phosphate phosphatase J	-
107871204	62.6276	164.151	233.651	13.6439	20.7502	17.5705	153.476	17.3215	3.15211	1.03324e-08	9.73859e-07	LOC107871204	NC_029981.1	202667710	202668642	-	853	lncRNA	uncharacterized LOC107871204	-
107845478	486.788	1192.98	537.837	140.229	123.671	62.7518	739.202	108.884	2.76287	1.03956e-08	9.76017e-07	LOC107845478	NC_029986.1	540557	541165	-	609	protein_coding	calcium-binding protein PBP1-like	-
107875565	1276.75	1154.83	520.203	219.06	208.332	198.296	983.929	208.562	2.23752	1.06655e-08	9.97491e-07	LOC107875565	NC_029982.1	6883142	6885267	+	2126	protein_coding	exocyst complex component EXO70A1-like	Exo70
107850614	118.138	113.287	113.519	311.535	389.274	287.822	114.981	329.543	-1.51957	1.11506e-08	1.03885e-06	LOC107850614	NC_029988.1	29155627	29157649	-	2023	protein_coding	farnesylcysteine lyase	-
107843175	2655.98	3004.42	3499.25	1299.2	1106.4	1310.26	3053.22	1238.62	1.30174	1.32768e-08	1.2322e-06	LOC107843175	NC_029985.1	236455363	236461328	-	2078	protein_coding	uncharacterized LOC107843175	-
107878510	622.006	653.134	490.446	68.9773	116.201	21.754	588.529	68.9774	3.09267	1.38521e-08	1.28069e-06	LOC107878510	NC_029983.1	210348867	210349891	+	775	protein_coding	uncharacterized LOC107878510	-
107839600	244.817	120.223	530.123	27.2877	10.7901	35.9777	298.388	24.6852	3.5957	1.42837e-08	1.31557e-06	LOC107839600	NC_029984.1	131930755	131931481	-	727	protein_coding	rapid alkalinization factor-like	-
107841998	37.0072	152.591	35.268	0.757993	0	0.836691	74.9553	0.531561	7.12817	1.59947e-08	1.46434e-06	LOC107841998	NC_029985.1	79994584	79995762	+	1179	protein_coding	uncharacterized LOC107841998	-
107861156	51.2408	179.178	77.1488	9.09591	10.7901	3.34676	102.523	7.74426	3.72594	1.60199e-08	1.46434e-06	LOC107861156	NC_029978.1	129818895	129819828	+	934	protein_coding	uncharacterized LOC107861156	-
novel.1798	109.598	277.438	102.498	15.1599	27.3902	18.4072	163.178	20.3191	3.00849	1.68484e-08	1.53428e-06	-	NC_029979.1	66269318	66271007	-	1690	-	PF14111:Domain of unknown function (DUF4283)	-
107871210	3880.07	6831.9	5877.64	1813.88	1544.64	1843.23	5529.87	1733.92	1.67331	1.74759e-08	1.58546e-06	LOC107871210	NC_029981.1	202771509	202772270	+	762	protein_coding	dehydrin HIRD11-like	-
107846227	160.839	529.444	230.344	44.7216	49.8005	34.3043	306.876	42.9421	2.83794	1.85417e-08	1.67588e-06	LOC107846227	NC_029977.1	231033731	231034980	+	1248	protein_coding	E3 ubiquitin-protein ligase PUB23-like	U-box
107857049	29.8905	106.351	33.0638	3.03197	1.66002	0.836691	56.4351	1.84289	4.92185	1.90631e-08	1.7166e-06	LOC107857049	NW_015961871.1	22	719	-	698	protein_coding	zinc finger protein ZAT11-like	-
107863075	28.4671	19.6518	39.6765	114.457	190.902	145.584	29.2652	150.314	-2.35717	1.9949e-08	1.78778e-06	LOC107863075	NC_029977.1	296037963	296045854	-	5629	pseudogene	-	-
107871680	19.927	68.2034	62.8212	2.27398	3.32003	1.67338	50.3172	2.42246	4.38313	2.00012e-08	1.78778e-06	LOC107871680	NC_029981.1	30321767	30322114	+	348	protein_coding	E3 ubiquitin-protein ligase ATL59	-
107846196	45.5474	40.4597	40.7787	0.757993	0	0	42.2619	0.252664	7.18948	2.02063e-08	1.79947e-06	LOC107846196	NC_029987.1	11376860	11377984	+	906	pseudogene	-	-
107869761	98.2115	306.337	286.553	19.7078	27.3902	40.9978	230.367	29.3653	2.97558	2.05172e-08	1.82047e-06	LOC107869761	NC_029980.1	181178359	181179690	+	710	protein_coding	uncharacterized protein At5g65660-like	-
107875358	37.0072	26.5878	23.1446	114.457	123.671	106.26	28.9132	114.796	-2.00201	2.265e-08	1.99801e-06	LOC107875358	NC_029982.1	2825444	2827724	+	2280	protein_coding	pentatricopeptide repeat-containing protein At3g25210%2C mitochondrial	-
107867041	61.2043	256.63	174.136	18.1918	12.4501	21.754	163.99	17.4653	3.23314	2.27631e-08	1.99801e-06	LOC107867041	NC_029980.1	6135623	6138852	-	1636	protein_coding	anthocyanidin 3-O-glucosyltransferase 5-like	UDPGT
107860082	95.3648	6.93594	322.923	1.51599	0.830008	2.51007	141.741	1.61869	6.45505	2.27656e-08	1.99801e-06	LOC107860082	NC_029978.1	151041087	151043155	-	1736	protein_coding	protein NtpR	-
107851604	250.511	445.056	246.876	84.1372	81.3407	76.1388	314.148	80.5389	1.9642	2.30631e-08	2.01682e-06	LOC107851604	NC_029988.1	199892826	199898907	-	1124	protein_coding	very-long-chain enoyl-CoA reductase-like%2C transcript variant X2	-
107865641	61.2043	39.3037	68.3318	347.919	170.152	359.777	56.2799	292.616	-2.37916	2.62075e-08	2.28354e-06	LOC107865641	NC_029979.1	246829304	246871493	-	487	protein_coding	uncharacterized LOC107865641	-
107879725	41.2773	201.142	141.072	6.06394	12.4501	1.67338	127.831	6.72915	4.24991	2.7084e-08	2.35121e-06	LOC107879725	NC_029984.1	119544186	119546452	-	1683	protein_coding	histidine decarboxylase-like	-
107850747	132.372	201.142	225.936	54.5755	33.2003	44.3446	186.483	44.0401	2.08279	2.71782e-08	2.35121e-06	LOC107850747	NC_029977.1	297340490	297342708	+	2219	protein_coding	transcription factor MYC2-like	HLH
107869526	340.182	124.847	231.446	25.7718	40.6704	46.8547	232.158	37.7656	2.62013	2.93154e-08	2.52707e-06	LOC107869526	NC_029980.1	26012850	26015041	+	2020	pseudogene	-	UDPGT
107879509	18.5036	39.3037	26.451	0	0	0	28.0861	0	7.56712	2.98461e-08	2.5637e-06	LOC107879509	NC_029984.1	145990434	145991360	-	927	protein_coding	ethylene-responsive transcription factor ERF109	AP2
107854862	123.832	154.903	89.2722	463.134	633.296	363.96	122.669	486.797	-1.98923	3.12661e-08	2.67618e-06	LOC107854862	NW_015961277.1	11400	12978	+	1579	protein_coding	F-box/kelch-repeat protein At1g15670-like	Kelch_1
107864220	140.912	260.098	272.225	40.9316	60.5906	51.8748	224.412	51.1323	2.13736	3.19598e-08	2.72592e-06	LOC107864220	NC_029979.1	241048388	241056806	+	3493	protein_coding	protein NRT1/ PTR FAMILY 5.2-like%2C transcript variant X1	-
107862986	691.751	2551.27	1075.67	183.434	164.341	264.394	1439.57	204.057	2.81893	3.21557e-08	2.73301e-06	LOC107862986	NC_029979.1	35851294	35853753	+	1427	pseudogene	-	-
107840068	12033	6004.21	11306.7	2927.37	2706.65	2487.48	9781.32	2707.17	1.8532	3.2602e-08	2.76125e-06	LOC107840068	NC_029984.1	140618634	140623231	+	2004	protein_coding	bifunctional riboflavin biosynthesis protein RIBA 1%2C chloroplastic	DHBP_synthase
107870973	619.16	1073.91	535.633	209.206	184.262	191.602	742.903	195.023	1.9296	3.30769e-08	2.79171e-06	LOC107870973	NC_029981.1	171345926	171347257	+	1332	protein_coding	mitochondrial uncoupling protein 5-like	Mito_carr
107840311	276.131	273.97	257.897	607.91	570.215	590.704	269.333	589.61	-1.13094	3.47435e-08	2.9222e-06	LOC107840311	NC_029984.1	146381606	146384215	+	2129	protein_coding	putative nuclease HARBI1	-
107854856	1514.45	1310.89	1462.52	664.002	552.785	668.516	1429.29	628.434	1.18523	3.754e-08	3.14648e-06	LOC107854856	NW_015961274.1	21039	22166	+	533	protein_coding	high-light-induced protein%2C chloroplastic	-
107874844	37.0072	26.5878	34.1659	110.667	120.351	117.137	32.587	116.052	-1.83714	3.77607e-08	3.15406e-06	LOC107874844	NC_029977.1	60441820	60443688	-	1869	protein_coding	UDP-glycosyltransferase 92A1	UDPGT
107839479	509.561	613.831	1227.77	166.758	189.242	130.524	783.72	162.175	2.27334	3.87723e-08	3.22743e-06	LOC107839479	NC_029984.1	128775782	128778558	+	938	protein_coding	guanine deaminase-like	-
107843755	425.583	966.408	657.969	102.329	163.511	54.3849	683.32	106.742	2.67884	4.56312e-08	3.78536e-06	LOC107843755	NC_029986.1	199207090	199208132	+	1043	protein_coding	calmodulin-binding protein 25-like	-
107859510	862.553	990.684	776.999	324.421	398.404	299.535	876.745	340.787	1.36335	4.68481e-08	3.87304e-06	LOC107859510	NC_029978.1	139953339	139955004	-	1666	protein_coding	U-box domain-containing protein 8	U-box
107859543	768.612	1124.78	1194.7	325.179	356.903	216.703	1029.36	299.595	1.78097	4.88539e-08	4.02513e-06	LOC107859543	NC_029978.1	140772251	140775792	+	2416	protein_coding	putative receptor-like protein kinase At4g00960	Pkinase_Tyr
107861650	2878.02	3629.81	2966.92	1296.17	1499.82	1238.3	3158.25	1344.76	1.23188	5.28663e-08	4.34095e-06	LOC107861650	NC_029979.1	1131877	1134771	-	1630	protein_coding	ethylene-responsive transcription factor RAP2-12-like%2C transcript variant X2	AP2
107863302	189.306	554.875	522.408	62.1554	46.4804	90.3626	422.196	66.3328	2.67147	5.53016e-08	4.52558e-06	LOC107863302	NC_029979.1	59883377	59885783	+	1297	protein_coding	25.3 kDa vesicle transport protein%2C transcript variant X1	-
107869775	532.335	447.368	519.101	147.809	135.291	215.029	499.601	166.043	1.58943	5.64252e-08	4.60198e-06	LOC107869775	NC_029980.1	188466941	188467780	+	840	protein_coding	uncharacterized LOC107869775	-
107875992	380.036	282.062	178.544	993.728	991.029	987.295	280.214	990.684	-1.82426	5.73625e-08	4.66272e-06	LOC107875992	NC_029982.1	19208725	19210800	-	1287	protein_coding	ABC transporter I family member 17-like	ABC_tran
107851635	28.4671	43.9276	60.6169	4.54796	4.15004	5.02014	44.3372	4.57271	3.28414	6.59373e-08	5.34181e-06	LOC107851635	NC_029988.1	225215759	225216782	-	1024	protein_coding	uncharacterized LOC107851635	-
107846919	37.0072	73.9834	36.3702	3.03197	5.81005	0.836691	49.1203	3.22624	3.93012	7.06611e-08	5.70542e-06	LOC107846919	NC_029987.1	34940707	34941495	-	789	protein_coding	zinc finger protein ZAT11-like	-
107848673	996.349	458.928	911.458	163.726	110.391	220.886	788.912	165.001	2.25715	8.32061e-08	6.69602e-06	LOC107848673	NC_029987.1	164597780	164602022	+	1410	protein_coding	uncharacterized LOC107848673	-
107843719	226.313	603.427	113.519	21.2238	43.1604	14.2237	314.42	26.2026	3.58569	8.382e-08	6.72309e-06	LOC107843719	NC_029986.1	197285736	197286697	-	962	pseudogene	-	-
107861665	3786.13	5600.77	5605.41	1848.74	1995.34	1945.31	4997.44	1929.8	1.3729	8.8136e-08	7.04593e-06	LOC107861665	NC_029979.1	1425179	1429920	-	3131	protein_coding	linoleate 13S-lipoxygenase 3-1%2C chloroplastic	Lipoxygenase
novel.5101	122.409	202.298	192.872	48.5115	43.9904	53.5482	172.526	48.6834	1.82832	9.44196e-08	7.51401e-06	-	NC_029986.1	200853102	200853451	+	350	-	-	-
107860484	1281.02	1657.69	1499.99	541.965	600.095	694.453	1479.57	612.171	1.27363	9.46115e-08	7.51401e-06	LOC107860484	NC_029978.1	159029698	159040165	+	2952	protein_coding	cyclic nucleotide-gated ion channel 2%2C transcript variant X2	cNMP_binding
107860371	513.831	556.031	387.948	162.968	201.692	159.808	485.937	174.823	1.47461	9.6586e-08	7.64576e-06	LOC107860371	NC_029978.1	156921600	156923980	-	2381	protein_coding	lysM domain receptor-like kinase 4	Pkinase
107860634	378.613	380.321	405.582	144.019	161.021	182.399	388.172	162.48	1.25737	9.81474e-08	7.74406e-06	LOC107860634	NC_029978.1	161328128	161334598	-	1973	protein_coding	deoxynucleoside triphosphate triphosphohydrolase SAMHD1 homolog%2C transcript variant X1	HD
107873470	116.715	91.3232	83.7616	272.119	247.342	313.759	97.2666	277.74	-1.51835	1.00421e-07	7.89771e-06	LOC107873470	NC_029982.1	188877136	188884324	-	5501	pseudogene	-	NB-ARC
107857067	374.342	771.045	380.233	1946.53	1910.68	1926.9	508.54	1928.03	-1.92213	1.01221e-07	7.9349e-06	LOC107857067	NW_015961889.1	489	1581	+	1006	protein_coding	transcription factor HBP-1b(c38)-like	-
107842554	286.094	154.903	335.046	59.1234	70.5506	57.7317	258.681	62.4686	2.04998	1.02824e-07	8.03454e-06	LOC107842554	NC_029985.1	110086557	110090328	-	3655	protein_coding	receptor-like protein 12	LRRNT_2
107858641	4245.87	2533.93	3882.79	1043	1344.61	861.791	3554.2	1083.13	1.71423	1.03562e-07	8.06617e-06	LOC107858641	NC_029978.1	82844353	82850242	-	3875	protein_coding	calcium-transporting ATPase 2%2C plasma membrane-type-like	E1-E2_ATPase
107874693	323.102	142.187	230.344	31.8357	47.3104	11.7137	231.878	30.2866	2.93503	1.0542e-07	8.1846e-06	LOC107874693	NC_029982.1	12961375	12962612	-	1238	protein_coding	uncharacterized LOC107874693	-
107859358	16533.7	12127.5	12049.5	32298.8	34686	30971.8	13570.2	32652.2	-1.26679	1.07304e-07	8.30424e-06	LOC107859358	NC_029978.1	135856880	135858388	+	794	protein_coding	auxin-repressed 12.5 kDa protein%2C transcript variant X2	-
107872908	290.364	915.544	569.799	106.119	116.201	123.83	591.903	115.383	2.35988	1.11498e-07	8.60134e-06	LOC107872908	NC_029982.1	39002950	39004509	+	909	protein_coding	uncharacterized LOC107872908	-
107867526	96.7882	263.566	114.621	26.5297	27.3902	14.2237	158.325	22.7146	2.80119	1.13249e-07	8.70867e-06	LOC107867526	NC_029980.1	29584710	29587373	-	2662	protein_coding	serine/threonine-protein kinase-like protein CCR4	Pkinase
107878665	557.955	273.97	439.748	112.183	75.5307	123.83	423.891	103.848	2.02812	1.15718e-07	8.87041e-06	LOC107878665	NC_029983.1	216006726	216009542	+	1236	protein_coding	E3 ubiquitin-protein ligase RMA3-like	zf-C3HC4
107863008	76.8612	547.939	209.404	26.5297	27.3902	21.754	278.068	25.2246	3.46331	1.20909e-07	9.23908e-06	LOC107863008	NC_029979.1	36465446	36466113	-	668	protein_coding	uncharacterized LOC107863008	-
107877640	1132.99	2274.99	1669.72	552.577	501.325	476.077	1692.57	509.993	1.73091	1.23165e-07	9.38187e-06	LOC107877640	NC_029983.1	10019023	10024095	-	1824	protein_coding	glucan endo-1%2C3-beta-glucosidase-like	Glyco_hydro_17
107840805	996.349	529.444	547.757	194.046	186.752	208.336	691.183	196.378	1.8144	1.28736e-07	9.77544e-06	LOC107840805	NC_029985.1	1275517	1277981	-	2030	protein_coding	putative glycerol-3-phosphate transporter 5	MFS_1
107879575	12.8102	1.15599	6.61275	59.1234	78.8507	66.9352	6.85965	68.3031	-3.35859	1.29549e-07	9.80644e-06	LOC107879575	NC_029984.1	152746518	152748770	-	1182	protein_coding	probable flavin-containing monooxygenase 1	FMO-like
107860446	1172.84	931.728	1048.12	489.663	468.124	487.791	1050.9	481.859	1.12447	1.36474e-07	1.02985e-05	LOC107860446	NC_029978.1	158315084	158320530	+	1749	protein_coding	ninja-family protein AFP3	-
107849654	62.6276	138.719	101.396	21.2238	14.9401	7.53022	100.914	14.5647	2.7899	1.41536e-07	1.06473e-05	LOC107849654	NC_029988.1	170920234	170934150	+	846	protein_coding	probable WRKY transcription factor 50%2C transcript variant X2	WRKY
novel.5740	431.277	3882.97	1237.69	179.644	163.511	142.237	1850.65	161.798	3.51583	1.4645e-07	1.09828e-05	-	NC_029987.1	172692144	172693700	-	1557	-	-	-
107842961	456.897	379.165	445.259	74.2833	99.6009	21.754	427.107	65.2127	2.71073	1.55773e-07	1.16459e-05	LOC107842961	NC_029985.1	218055613	218056489	+	877	protein_coding	calmodulin	-
107844731	401.386	386.101	572.003	169.032	170.152	153.114	453.163	164.099	1.46618	1.56417e-07	1.16581e-05	LOC107844731	NC_029986.1	205001211	205001846	-	636	protein_coding	calmodulin-binding protein 25-like	-
107873260	922.334	641.575	912.56	331.243	276.393	328.819	825.49	312.152	1.40259	1.5708e-07	1.16716e-05	LOC107873260	NC_029982.1	111508444	111512903	+	3796	protein_coding	probable LRR receptor-like serine/threonine-protein kinase IRK	LRRNT_2
107839010	3576.89	2796.34	2413.66	1254.48	1171.14	1122	2928.96	1182.54	1.30821	1.59236e-07	1.17957e-05	LOC107839010	NC_029977.1	167256406	167257569	-	1164	protein_coding	zinc finger A20 and AN1 domain-containing stress-associated protein 5	zf-AN1
novel.957	113.868	25.4318	82.6594	7.57993	3.32003	6.69352	73.9865	5.86449	3.65005	1.65889e-07	1.2251e-05	-	NC_029978.1	157110540	157111680	+	1119	-	-	-
107873846	14.2336	27.7438	14.3276	79.5892	92.9608	100.403	18.7683	90.9843	-2.26932	1.67157e-07	1.23071e-05	LOC107873846	NC_029982.1	8586183	8607803	+	3284	protein_coding	uncharacterized LOC107873846	-
107850672	1450.4	715.558	1667.52	328.211	342.793	332.166	1277.82	334.39	1.93403	1.6932e-07	1.24286e-05	LOC107850672	NC_029988.1	200377727	200384895	+	2773	protein_coding	calcium-dependent protein kinase 1-like	Pkinase
107844729	17.0803	16.1839	44.085	0	0	0	25.7831	0	7.44448	1.79038e-07	1.31023e-05	LOC107844729	NC_029986.1	204766435	204771202	+	1827	pseudogene	-	-
107862650	274.708	319.053	407.787	128.859	102.091	80.3223	333.849	103.757	1.68601	1.82974e-07	1.33499e-05	LOC107862650	NC_029979.1	23187534	23191622	-	1979	protein_coding	transmembrane protein 53	-
107870505	24.197	32.3677	39.6765	2.27398	3.32003	1.67338	32.0804	2.42246	3.73332	1.88301e-07	1.36973e-05	LOC107870505	NC_029981.1	32014241	32016590	-	1247	protein_coding	protein ODORANT1	Myb_DNA-binding
107873791	69.7444	41.6156	38.5744	4.54796	9.13008	4.18345	49.9782	5.95383	3.06765	1.89113e-07	1.37028e-05	LOC107873791	NC_029982.1	3223417	3224784	+	825	protein_coding	stress response protein NST1-like	-
107861451	1624.05	317.897	961.054	147.051	90.4708	144.747	967.666	127.423	2.92431	1.89507e-07	1.37028e-05	LOC107861451	NC_029978.1	159795221	159796993	-	1275	protein_coding	myb-related protein 306-like	Myb_DNA-binding
107868085	276.131	743.302	263.408	71.2513	78.0207	81.9957	427.614	77.0892	2.47245	1.92188e-07	1.38552e-05	LOC107868085	NC_029977.1	13050544	13051965	+	1422	pseudogene	-	AP2
107839338	1780.62	1434.58	1205.73	588.96	619.186	484.444	1473.64	564.197	1.38463	1.93947e-07	1.39406e-05	LOC107839338	NC_029984.1	125352690	125354519	+	1830	protein_coding	AAA-ATPase At2g46620-like	AAA
107866122	1376.38	1534	788.02	196.32	269.752	61.9151	1232.8	175.996	2.80807	1.94769e-07	1.39583e-05	LOC107866122	NC_029979.1	42427796	42429473	+	1348	protein_coding	GDSL esterase/lipase At4g10955-like	-
107848542	62.6276	286.686	83.7616	17.4338	12.4501	6.69352	144.358	12.1925	3.56331	1.9704e-07	1.40793e-05	LOC107848542	NC_029987.1	216443544	216445060	-	595	protein_coding	uncharacterized LOC107848542	-
107857980	617.736	706.31	588.535	250.896	222.442	304.555	637.527	259.298	1.29809	2.1052e-07	1.49983e-05	LOC107857980	NC_029978.1	118649681	118654318	-	1277	pseudogene	-	-
novel.1182	118.138	820.753	154.298	21.2238	34.0303	7.53022	364.396	20.9281	4.12218	2.19883e-07	1.56195e-05	-	NC_029978.1	148653331	148654773	-	1392	-	-	-
107866953	21.3503	41.6156	54.0042	269.845	126.991	356.43	38.99	251.089	-2.67878	2.33768e-07	1.65572e-05	LOC107866953	NC_029980.1	4678294	4687377	+	2086	protein_coding	cytokinin dehydrogenase 5	FAD_binding_4
107868043	179.343	164.151	134.459	399.462	387.614	368.144	159.318	385.073	-1.27602	2.35957e-07	1.66635e-05	LOC107868043	NC_029980.1	158375302	158376735	-	1434	protein_coding	elongation of fatty acids protein 3-like	ELO
novel.6090	417.043	668.162	328.433	145.535	131.141	124.667	471.213	133.781	1.8164	2.55372e-07	1.79822e-05	-	NC_029988.1	229828390	229832815	+	355	-	PF02519:Auxin responsive protein	Auxin_inducible
107860606	646.203	495.92	873.986	217.544	196.712	249.334	672.036	221.196	1.60355	2.6751e-07	1.87823e-05	LOC107860606	NC_029978.1	161018266	161019935	-	1670	protein_coding	peroxidase 63	-
107878274	14.2336	4.62396	2.20425	60.6394	63.0806	65.2619	7.02059	62.994	-3.22483	2.83118e-07	1.98207e-05	LOC107878274	NC_029983.1	189756008	189759445	+	2013	protein_coding	scarecrow-like protein 32%2C transcript variant X3	GRAS
107839654	2860.94	3543.11	3187.35	1153.66	883.958	1467.56	3197.13	1168.39	1.45234	2.85594e-07	1.99364e-05	LOC107839654	NC_029984.1	132769399	132772470	-	1630	protein_coding	probable protein phosphatase 2C 34%2C transcript variant X1	PP2C
107860001	579.306	249.694	590.739	104.603	129.481	99.5662	473.246	111.217	2.08894	2.9246e-07	2.03313e-05	LOC107860001	NC_029978.1	149832146	149835444	+	2877	protein_coding	disease resistance RPP13-like protein 4	NB-ARC
107877314	428.43	455.46	351.578	175.854	173.472	178.215	411.823	175.847	1.22717	2.92929e-07	2.03313e-05	LOC107877314	NC_029983.1	196996641	196997677	+	1037	protein_coding	uncharacterized LOC107877314	-
107847951	3027.48	1794.1	2140.33	807.262	864.868	585.683	2320.63	752.605	1.62425	3.03382e-07	2.09967e-05	LOC107847951	NC_029987.1	216030744	216032346	+	1603	protein_coding	AP2/ERF and B3 domain-containing transcription factor RAV1	B3
107843360	1624.05	1764.04	1164.95	4134.85	5229.05	3502.39	1517.68	4288.76	-1.49885	3.35858e-07	2.3178e-05	LOC107843360	NC_029977.1	220288481	220305784	+	3462	protein_coding	major facilitator superfamily domain-containing protein 12-like%2C transcript variant X4	-
107876005	22.7737	78.6073	52.902	3.78996	4.98005	5.85683	51.4277	4.87561	3.40881	3.55672e-07	2.44757e-05	LOC107876005	NC_029982.1	19724247	19726379	-	1724	protein_coding	aspartyl protease family protein At5g10770-like	-
107860532	330.218	485.516	613.884	129.617	170.982	107.096	476.539	135.898	1.81124	3.62399e-07	2.48679e-05	LOC107860532	NC_029978.1	159817692	159821768	+	2821	protein_coding	uncharacterized LOC107860532	-
107871161	852.59	1092.41	1213.44	470.713	439.074	422.529	1052.81	444.105	1.24579	3.81162e-07	2.60816e-05	LOC107871161	NC_029981.1	200846756	200852188	-	2473	protein_coding	alkaline/neutral invertase A%2C mitochondrial-like	-
107874584	24.197	9.24792	19.8383	88.6851	75.5307	100.403	17.7611	88.2062	-2.3252	3.86099e-07	2.6345e-05	LOC107874584	NC_029982.1	2706574	2710470	-	2140	protein_coding	cytochrome P450 CYP82D47	p450
19989157	81.1313	71.6714	99.1913	25.0138	22.4102	15.8971	83.998	21.107	1.99093	4.0165e-07	2.73291e-05	orf484	NC_024624.1	454429	455883	-	1455	protein_coding	-	RuBisCO_large
107870948	345.875	231.198	250.183	45.4796	53.9505	99.5662	275.752	66.3321	2.05603	4.06946e-07	2.76119e-05	LOC107870948	NC_029981.1	164900242	164903006	+	1481	protein_coding	lecithin-cholesterol acyltransferase-like 1	-
107878869	17.0803	23.1198	15.4298	87.1692	64.7406	88.6892	18.5433	80.1997	-2.11127	4.1261e-07	2.78843e-05	LOC107878869	NC_029983.1	220450161	220453497	+	3337	protein_coding	uncharacterized LOC107878869	-
107848327	69.7444	98.2592	191.77	14.4019	26.5602	15.8971	119.924	18.9531	2.66667	4.13262e-07	2.78843e-05	LOC107848327	NC_029977.1	270554808	270558908	+	2323	protein_coding	IQ domain-containing protein IQM2-like	-
107860951	260.474	1057.73	534.531	115.973	79.6807	108.77	617.579	101.474	2.60587	4.27633e-07	2.87738e-05	LOC107860951	NC_029978.1	75546536	75547244	+	709	protein_coding	probable calcium-binding protein CML23	-
107866087	17.0803	135.251	46.2893	1.51599	1.66002	5.02014	66.2068	2.73205	4.61083	4.68215e-07	3.14171e-05	LOC107866087	NC_029979.1	36473601	36474198	-	598	protein_coding	uncharacterized LOC107866087	-
107852865	44.124	595.335	324.025	25.0138	22.4102	24.264	321.161	23.896	3.74919	4.83522e-07	3.23546e-05	LOC107852865	NW_015960671.1	993	1812	+	820	protein_coding	tyramine N-feruloyltransferase 4/11	Acetyltransf_1
107844515	17.0803	20.8078	179.647	1.51599	0	1.67338	72.5115	1.06312	6.08589	4.93561e-07	3.29353e-05	LOC107844515	NC_029986.1	175654452	175659576	-	819	protein_coding	probable H/ACA ribonucleoprotein complex subunit 1	-
107848576	136.642	346.797	219.323	63.6714	47.3104	38.4878	234.254	49.8232	2.23338	5.07701e-07	3.37858e-05	LOC107848576	NC_029987.1	7291576	7292854	-	1279	protein_coding	putative uncharacterized protein DDB_G0277255	-
107853465	2070.98	2775.53	2155.76	1035.42	1102.25	1015.74	2334.09	1051.14	1.15106	5.36523e-07	3.5606e-05	LOC107853465	NW_015960855.1	6975692	6977788	-	2097	protein_coding	scarecrow-like protein 8	GRAS
107864240	3330.65	2692.3	2880.96	1388.64	1024.23	1378.87	2967.97	1263.91	1.2314	5.81732e-07	3.85008e-05	LOC107864240	NC_029979.1	241827164	241829918	-	815	protein_coding	protein PROTON GRADIENT REGULATION 5%2C chloroplastic	-
107840925	829.816	106.351	503.671	56.0915	57.2705	43.5079	479.946	52.29	3.1974	6.00219e-07	3.96161e-05	LOC107840925	NC_029985.1	6034509	6038462	-	1982	protein_coding	IQ domain-containing protein IQM1-like	-
107867464	28.4671	54.3315	62.8212	8.33792	2.49002	2.51007	48.5399	4.446	3.43632	6.04864e-07	3.98142e-05	LOC107867464	NC_029980.1	24474262	24475773	-	1512	protein_coding	protein EXORDIUM-like 2	-
107839139	204.963	686.658	637.029	89.4431	113.711	61.0784	509.55	88.0775	2.53318	6.13238e-07	4.0256e-05	LOC107839139	NC_029984.1	119583826	119584877	-	1052	protein_coding	tyramine N-feruloyltransferase 4/11-like	Acetyltransf_1
107862621	930.874	381.477	522.408	2274.74	2606.22	2044.04	611.586	2308.33	-1.9173	6.22274e-07	4.07387e-05	LOC107862621	NC_029979.1	22006575	22008669	+	1908	protein_coding	cytochrome P450 71A4-like	p450
107875519	536.605	507.48	741.731	222.85	204.182	256.864	595.272	227.965	1.38541	6.28088e-07	4.10086e-05	LOC107875519	NC_029982.1	5756946	5764959	+	1340	protein_coding	methylsterol monooxygenase 2-2	-
107876019	731.605	543.315	728.505	1603.91	1420.97	1512.74	667.808	1512.54	-1.17986	6.48858e-07	4.22507e-05	LOC107876019	NC_029982.1	20211584	20213273	+	1540	protein_coding	probable CCR4-associated factor 1 homolog 6%2C transcript variant X1	CAF1
107848425	354.415	242.758	422.114	97.7811	63.9106	118.81	339.763	93.5006	1.86143	6.66553e-07	4.32727e-05	LOC107848425	NC_029987.1	191447175	191448990	-	1161	lncRNA	uncharacterized LOC107848425%2C transcript variant X2	-
107843169	170.803	848.497	266.714	72.7673	24.0702	27.6108	428.671	41.4828	3.36784	6.68125e-07	4.32727e-05	LOC107843169	NC_029977.1	219893799	219894274	-	476	protein_coding	uncharacterized LOC107843169	-
novel.2052	35.5839	10.4039	28.6553	153.873	124.501	110.443	24.881	129.606	-2.39208	6.77789e-07	4.37816e-05	-	NC_029980.1	23286578	23303971	+	2643	-	-	-
107848688	15.6569	98.2592	22.0425	0.757993	0	0	45.3195	0.252664	7.29424	7.0359e-07	4.53273e-05	LOC107848688	NC_029987.1	11892140	11893141	+	1002	protein_coding	putative calcium-binding protein CML19	-
107860843	129.525	632.327	314.106	50.7855	63.0806	39.3245	358.653	51.0635	2.81315	7.16403e-07	4.59151e-05	LOC107860843	NC_029978.1	13778177	13779291	-	1115	protein_coding	NDR1/HIN1-Like protein 3-like	-
107850497	1303.79	1607.98	1414.03	2728.02	3220.43	3065.63	1441.93	3004.69	-1.05893	7.16506e-07	4.59151e-05	LOC107850497	NC_029988.1	209046512	209051967	-	1835	protein_coding	hippocampus abundant transcript-like protein 1%2C transcript variant X1	MFS_1
107864111	49.8174	112.131	233.651	18.1918	15.7701	5.85683	131.866	13.2729	3.31189	7.29333e-07	4.66138e-05	LOC107864111	NC_029979.1	235889010	235892198	+	1181	protein_coding	uncharacterized LOC107864111	-
107873810	439.817	350.265	168.625	74.2833	63.0806	86.1791	319.569	74.5143	2.0991	7.51766e-07	4.7854e-05	LOC107873810	NC_029982.1	5273269	5273607	+	339	protein_coding	uncharacterized LOC107873810	-
107860502	254.781	445.056	381.336	125.827	122.841	125.504	360.391	124.724	1.53239	7.52688e-07	4.7854e-05	LOC107860502	NC_029978.1	159226262	159232291	+	3193	protein_coding	probable serine/threonine-protein kinase At1g54610	Pkinase
107843882	41.2773	8.09193	23.1446	0	0	0	24.1713	0	7.34032	7.76588e-07	4.92442e-05	LOC107843882	NC_029986.1	202221782	202223801	+	1440	pseudogene	-	AAA
107862387	1033.36	283.218	704.258	125.827	122.011	148.094	673.611	131.977	2.3511	8.17994e-07	5.17344e-05	LOC107862387	NC_029979.1	15787311	15788603	+	1293	protein_coding	uncharacterized LOC107862387	-
107848543	2048.21	2991.7	2213.07	1077.11	1013.44	1000.68	2417.66	1030.41	1.23052	8.36375e-07	5.27591e-05	LOC107848543	NC_029987.1	7316483	7319727	+	469	lncRNA	uncharacterized LOC107848543%2C transcript variant X2	-
107877757	2872.33	2148.99	1053.63	8594.12	7521.53	7442.36	2024.98	7852.67	-1.95557	8.45965e-07	5.32255e-05	LOC107877757	NC_029983.1	28369534	28374209	-	1164	protein_coding	uncharacterized LOC107877757	-
107845466	1534.38	1702.77	1055.84	507.855	572.705	581.5	1431	554.02	1.3689	8.50823e-07	5.33925e-05	LOC107845466	NC_029986.1	2793975	2795729	+	1755	protein_coding	ethylene-responsive transcription factor 3-like	AP2
107875371	98.2115	188.426	128.949	30.3197	13.2801	35.9777	138.529	26.5258	2.38552	8.92594e-07	5.5869e-05	LOC107875371	NC_029982.1	3028395	3029290	+	896	protein_coding	calmodulin-like protein 3	-
107858011	101.058	1550.18	320.719	21.9818	51.4605	46.018	657.32	39.8201	4.04613	8.97042e-07	5.60027e-05	LOC107858011	NC_029978.1	123583860	123584882	-	1023	protein_coding	uncharacterized LOC107858011	-
107869731	35.5839	35.8357	23.1446	110.667	190.072	103.75	31.5214	134.829	-2.10138	9.07478e-07	5.64661e-05	LOC107869731	NC_029977.1	19680165	19687524	+	4894	protein_coding	G-type lectin S-receptor-like serine/threonine-protein kinase At1g67520	Pkinase_Tyr
107862314	165.109	183.802	156.502	62.1554	61.4206	36.8144	168.471	53.4634	1.65448	9.09127e-07	5.64661e-05	LOC107862314	NC_029979.1	12917065	12919861	+	2797	protein_coding	exocyst complex component EXO70B1-like%2C transcript variant X1	Exo70
107860134	142.336	167.619	170.83	415.38	472.274	330.493	160.261	406.049	-1.33954	9.15629e-07	5.67245e-05	LOC107860134	NC_029978.1	152309198	152312249	+	2918	protein_coding	uncharacterized LOC107860134%2C transcript variant X1	VWA
107846008	280.401	421.936	439.748	122.795	110.391	156.461	380.695	129.882	1.5531	9.28858e-07	5.73973e-05	LOC107846008	NC_029986.1	147548931	147557937	-	2267	protein_coding	auxin transporter-like protein 4%2C transcript variant X2	Aa_trans
107841159	37.0072	26.5878	81.5573	0.757993	5.81005	0.836691	48.3841	2.46825	4.30831	9.73639e-07	6.00114e-05	LOC107841159	NC_029977.1	191159280	191161857	+	1528	protein_coding	basic 7S globulin-like	-
107839572	861.13	732.898	782.509	412.348	385.124	379.858	792.179	392.443	1.01272	1.01913e-06	6.26558e-05	LOC107839572	NC_029984.1	131351947	131354119	-	2173	protein_coding	uncharacterized LOC107839572	Methyltransf_11
107871114	30484	12703.2	14400.4	5161.17	5494.65	4114.01	19195.9	4923.28	1.96306	1.0358e-06	6.35193e-05	LOC107871114	NC_029981.1	194737712	194741128	+	2548	protein_coding	zinc finger CCCH domain-containing protein 29	-
107869481	83.978	223.106	102.498	21.2238	14.1101	31.7942	136.527	22.3761	2.61142	1.05555e-06	6.45673e-05	LOC107869481	NC_029980.1	15516196	15518143	+	1363	protein_coding	transcription factor bHLH93-like	HLH
107839247	775.729	996.464	946.726	341.855	214.972	383.204	906.306	313.344	1.53245	1.06917e-06	6.50842e-05	LOC107839247	NC_029984.1	123318888	123321776	-	1857	protein_coding	F-box/kelch-repeat protein At3g61590	F-box
107847031	34.1605	19.6518	45.1872	0	1.66002	0	32.9998	0.553338	5.93262	1.06938e-06	6.50842e-05	LOC107847031	NC_029987.1	7826771	7827672	-	902	protein_coding	uncharacterized LOC107847031	-
107842516	845.473	472.8	599.556	157.662	150.231	251.844	639.276	186.579	1.7763	1.07943e-06	6.55314e-05	LOC107842516	NC_029985.1	95790152	95791652	+	932	protein_coding	photosystem II reaction center Psb28 protein	-
107861392	145.182	189.582	106.906	44.7216	29.8803	16.7338	147.224	30.4452	2.26995	1.08542e-06	6.57303e-05	LOC107861392	NC_029978.1	155545901	155547213	-	1313	protein_coding	mitogen-activated protein kinase kinase kinase NPK1-like	Pkinase
107878863	711.678	510.948	775.897	281.973	208.332	261.047	666.174	250.451	1.41098	1.10033e-06	6.64672e-05	LOC107878863	NC_029983.1	220397306	220400139	+	956	protein_coding	GPI-anchored protein LORELEI	-
novel.5865	18.5036	24.2758	11.0213	72.7673	73.8707	103.75	17.9336	83.4625	-2.22247	1.17426e-06	7.07564e-05	-	NC_029988.1	12431622	12433489	+	1638	-	-	-
107855817	9.96349	63.5795	37.4723	0	0	0.836691	37.0051	0.278897	7.00403	1.17861e-06	7.08426e-05	LOC107855817	NW_015961487.1	2632855	2633916	-	1062	protein_coding	B-box zinc finger protein 32	-
107879997	14.2336	473.956	31.9616	2.27398	6.64006	3.34676	173.384	4.08693	5.41117	1.25377e-06	7.51734e-05	LOC107879997	NC_029984.1	148479029	148480093	+	489	protein_coding	protein RADIALIS-like 1	-
107868296	1076.06	2142.05	1403.01	466.166	478.914	565.603	1540.37	503.561	1.61341	1.32048e-06	7.88009e-05	LOC107868296	NC_029980.1	205795132	205799004	+	3504	protein_coding	probable LRR receptor-like serine/threonine-protein kinase At3g47570	LRR_1
107862416	82.5546	159.527	106.906	23.4978	34.0303	30.9576	116.329	29.4952	1.9842	1.32078e-06	7.88009e-05	LOC107862416	NC_029979.1	16615818	16617596	-	1779	protein_coding	RING-H2 finger protein ATL46-like	-
107843248	119.562	56.6435	74.9446	247.864	302.953	286.148	83.7166	278.988	-1.74334	1.3281e-06	7.90063e-05	LOC107843248	NC_029985.1	238535475	238539185	-	2624	protein_coding	FBD-associated F-box protein At2g26860-like%2C transcript variant X1	F-box
107865970	330.218	254.318	285.451	668.55	578.515	684.413	289.996	643.826	-1.15216	1.33074e-06	7.90063e-05	LOC107865970	NC_029977.1	6129287	6132446	+	1272	protein_coding	F-box protein PP2-A12	-
107866178	802.772	2361.69	1019.47	339.581	272.242	318.779	1394.64	310.201	2.16879	1.34587e-06	7.97088e-05	LOC107866178	NC_029979.1	59552619	59553523	+	620	protein_coding	patellin-2%2C transcript variant X1	HMA
107875379	425.583	386.101	473.914	209.206	198.372	182.399	428.533	196.659	1.12362	1.36572e-06	8.06874e-05	LOC107875379	NC_029982.1	3111656	3123194	+	1501	protein_coding	ribonuclease 2-like%2C transcript variant X2	Ribonuclease_T2
107860474	489.634	338.705	467.301	175.096	187.582	162.318	431.88	174.999	1.30259	1.38496e-06	8.16248e-05	LOC107860474	NC_029978.1	158859247	158864722	+	2673	protein_coding	probable galacturonosyltransferase 13	Glyco_transf_8
107849713	24.197	38.1477	19.8383	1.51599	1.66002	2.51007	27.3943	1.89536	3.86091	1.42349e-06	8.36437e-05	LOC107849713	NC_029988.1	2490017	2491211	+	541	pseudogene	-	-
107845781	703.138	675.098	957.747	311.535	278.053	357.267	778.661	315.618	1.30332	1.42612e-06	8.36437e-05	LOC107845781	NC_029986.1	117152116	117154347	+	1145	protein_coding	aquaporin PIP2-7-like	-
107848221	28.4671	167.619	167.523	16.6758	10.7901	7.53022	121.203	11.6654	3.37627	1.45917e-06	8.53756e-05	LOC107848221	NC_029987.1	167132265	167138508	+	1434	protein_coding	IAA-amino acid hydrolase ILR1-like 4	M20_dimer
107867463	1510.18	1881.95	2375.08	685.983	868.188	602.417	1922.4	718.863	1.41943	1.47457e-06	8.60689e-05	LOC107867463	NC_029980.1	24430604	24435092	-	1953	protein_coding	phospho-2-dehydro-3-deoxyheptonate aldolase 1%2C chloroplastic	-
107877798	566.495	530.6	621.599	256.96	212.482	288.658	572.898	252.7	1.18099	1.50223e-06	8.74724e-05	LOC107877798	NC_029983.1	40832693	40837877	-	1513	protein_coding	chitinase domain-containing protein 1	-
107862410	139.489	558.343	285.451	72.0093	38.1803	50.2014	327.761	53.4637	2.616	1.50775e-06	8.75833e-05	LOC107862410	NC_029979.1	16389114	16390477	-	1364	protein_coding	uncharacterized LOC107862410	-
107839573	340.182	279.75	313.004	925.509	1223.43	630.865	310.978	926.602	-1.57563	1.51867e-06	8.80064e-05	LOC107839573	NC_029984.1	131362490	131375956	+	6236	protein_coding	DNA polymerase zeta catalytic subunit%2C transcript variant X2	DNA_pol_B_exo
107862196	61.2043	137.563	155.4	20.4658	28.2203	25.9374	118.056	24.8745	2.25221	1.58302e-06	9.15169e-05	LOC107862196	NC_029979.1	10679219	10686556	+	3908	protein_coding	kinesin-like protein NACK1	Kinesin
107840369	224.89	513.26	301.982	55.3335	92.1308	24.264	346.711	57.2428	2.59909	1.6184e-06	9.31863e-05	LOC107840369	NC_029984.1	147647161	147649138	+	1628	protein_coding	9-divinyl ether synthase	p450
107851213	72.5911	6.93594	46.2893	0.757993	0.830008	0.836691	41.9388	0.80823	5.69518	1.61959e-06	9.31863e-05	LOC107851213	NC_029977.1	299283813	299290129	+	2167	protein_coding	protein NRT1/ PTR FAMILY 6.3-like	-
107838763	296.058	175.711	275.531	90.2011	73.0407	87.8525	249.1	83.6981	1.57194	1.6351e-06	9.38555e-05	LOC107838763	NC_029984.1	1690797	1695451	-	969	protein_coding	SEC14 cytosolic factor-like	-
107838868	4.27007	176.867	106.906	3.78996	0.830008	0	96.0143	1.53999	5.93842	1.64322e-06	9.40986e-05	LOC107838868	NC_029984.1	28607553	28609321	-	770	protein_coding	protein TIFY 5A	Zim
107842870	1060.4	2093.5	1464.73	552.577	542.825	478.587	1539.54	524.663	1.55332	1.72616e-06	9.86151e-05	LOC107842870	NC_029985.1	203246494	203250950	+	1633	protein_coding	phosphatidylinositol:ceramide inositolphosphotransferase 2-like	-
107859729	348.722	217.326	332.842	98.539	119.521	103.75	299.63	107.27	1.4814	1.74978e-06	9.97294e-05	LOC107859729	NC_029978.1	143931306	143937341	+	3829	protein_coding	uncharacterized LOC107859729	-
107862195	280.401	438.12	433.135	152.357	149.401	130.524	383.886	144.094	1.415	1.8759e-06	0.000106667	LOC107862195	NC_029979.1	10646888	10652486	-	3602	protein_coding	LEAF RUST 10 DISEASE-RESISTANCE LOCUS RECEPTOR-LIKE PROTEIN KINASE-like 1.2%2C transcript variant X2	Pkinase
107877201	95.3648	87.8553	96.9871	34.1097	30.7103	21.754	93.4024	28.858	1.69177	1.94885e-06	0.00011004	LOC107877201	NC_029983.1	165513675	165514543	-	869	protein_coding	F-box protein SNE	-
107845345	680.364	256.63	380.233	103.087	119.521	112.117	439.076	111.575	1.97526	1.94974e-06	0.00011004	LOC107845345	NC_029986.1	1191646	1199616	-	1939	protein_coding	probable aminotransferase TAT2%2C transcript variant X3	Aminotran_1_2
107870355	458.32	1722.43	792.428	125.827	243.192	92.036	991.058	153.685	2.68941	1.95281e-06	0.00011004	LOC107870355	NC_029981.1	16379477	16382184	-	1356	protein_coding	protein ATAF2-like	NAM
novel.5005	42.7007	28.8998	48.4935	140.987	108.731	146.421	40.0313	132.046	-1.72263	1.9534e-06	0.00011004	-	NC_029986.1	160111983	160113111	+	1129	-	-	-
107861681	395.693	930.572	624.905	154.631	221.612	134.707	650.39	170.317	1.93385	1.96445e-06	0.000110406	LOC107861681	NC_029979.1	1604149	1606411	+	1284	protein_coding	protein TIFY 10c-like	Zim
107878773	45.5474	39.3037	138.868	8.33792	10.7901	7.53022	74.573	8.88608	3.07325	1.98284e-06	0.000110977	LOC107878773	NC_029983.1	218931648	218935754	-	1245	protein_coding	pirin-like protein At1g50590	-
107870543	288.941	276.282	427.625	126.585	107.901	130.524	330.949	121.67	1.4446	1.98378e-06	0.000110977	LOC107870543	NC_029977.1	27725319	27727391	-	1414	lncRNA	uncharacterized LOC107870543%2C transcript variant X1	-
107878458	636.24	1450.77	512.489	178.128	229.082	108.77	866.499	171.993	2.33292	2.01721e-06	0.000112587	LOC107878458	NC_029983.1	207915919	207918167	+	1853	protein_coding	heat stress transcription factor A-4c-like	HSF_DNA-bind
107875145	1915.84	1635.73	1684.05	463.134	808.427	389.061	1745.2	553.541	1.65664	2.02545e-06	0.000112787	LOC107875145	NC_029982.1	210286121	210287454	-	831	protein_coding	probable glutathione S-transferase	GST_C
107843510	49.8174	39.3037	108.008	11.3699	4.98005	10.0403	65.7098	8.79674	2.90055	2.03032e-06	0.000112799	LOC107843510	NC_029986.1	179381149	179384667	+	1712	protein_coding	uncharacterized LOC107843510%2C transcript variant X2	-
107849568	35.5839	45.0836	55.1063	138.713	165.172	119.647	45.2579	141.177	-1.6338	2.05096e-06	0.000113685	LOC107849568	NC_029988.1	65953568	65955214	+	1533	protein_coding	uncharacterized LOC107849568%2C transcript variant X1	-
107879766	116.715	663.538	72.7403	17.4338	26.5602	24.264	284.331	22.7527	3.64477	2.10662e-06	0.000116504	LOC107879766	NC_029984.1	125524792	125525729	-	938	protein_coding	sigma factor binding protein 1%2C chloroplastic-like	-
107866097	14.2336	26.5878	65.0254	0	0.830008	0.836691	35.2823	0.555566	6.03163	2.21026e-06	0.000121957	LOC107866097	NC_029979.1	36740097	36741556	+	1143	protein_coding	lignin-forming anionic peroxidase-like	-
107851840	1195.62	4398.54	1288.39	340.339	500.495	261.047	2294.18	367.294	2.64309	2.22104e-06	0.000122273	LOC107851840	NC_029977.1	300840530	300843712	-	1112	protein_coding	B2 protein-like	-
107868304	795.656	583.775	707.565	200.11	107.901	269.414	695.665	192.475	1.85348	2.23806e-06	0.000122768	LOC107868304	NC_029977.1	13671465	13672414	-	950	protein_coding	proline-rich receptor-like protein kinase PERK2	-
107839265	49.8174	90.1672	203.893	18.1918	18.2602	14.2237	114.626	16.8919	2.76535	2.24017e-06	0.000122768	LOC107839265	NC_029984.1	123573237	123575290	-	1797	protein_coding	WRKY transcription factor 22-like	WRKY
107863342	116.715	240.446	285.451	59.1234	50.6305	56.0583	214.204	55.2707	1.95668	2.24858e-06	0.000122951	LOC107863342	NC_029979.1	65169117	65224952	-	2020	protein_coding	traB domain-containing protein	-
107862931	1212.7	230.042	634.824	114.457	109.561	116.3	692.522	113.439	2.60927	2.28479e-06	0.00012465	LOC107862931	NC_029979.1	34001294	34006594	+	4152	protein_coding	cellulose synthase-like protein D3	-
107846016	24.197	56.6435	28.6553	134.923	152.721	138.891	36.4986	142.178	-1.95445	2.32344e-06	0.000126473	LOC107846016	NC_029986.1	149535113	149536129	+	909	protein_coding	uncharacterized LOC107846016	-
107878561	2522.19	1210.32	2660.53	668.55	617.526	676.883	2131.01	654.319	1.70338	2.33563e-06	0.000126852	LOC107878561	NC_029983.1	212452331	212457670	+	2520	protein_coding	mitogen-activated protein kinase 19-like	Pkinase
107870423	109.598	35.8357	56.2084	274.393	278.053	284.475	67.2142	278.974	-2.06196	2.46847e-06	0.000133767	LOC107870423	NC_029981.1	23005417	23008219	+	2803	protein_coding	disease resistance protein RPP13-like	NB-ARC
107875416	217.773	450.836	425.421	75.0413	128.651	66.0986	364.677	89.9303	2.02132	2.52701e-06	0.000136633	LOC107875416	NC_029982.1	3676252	3677960	+	1709	protein_coding	CBL-interacting serine/threonine-protein kinase 11	Pkinase
107864209	1017.7	1261.19	1743.56	556.367	518.755	434.242	1340.82	503.121	1.41445	2.56198e-06	0.000138216	LOC107864209	NC_029979.1	240689384	240695308	+	2494	protein_coding	long-chain-alcohol oxidase FAO1	-
107865944	239.124	198.83	339.455	65.1874	58.9305	102.913	259.136	75.677	1.77722	2.60744e-06	0.000140355	LOC107865944	NC_029979.1	16498773	16500093	-	1321	pseudogene	-	Sulfotransfer_1
107876601	92.5181	138.719	136.664	36.3836	45.6504	37.6511	122.634	39.895	1.6243	2.61938e-06	0.000140686	LOC107876601	NC_029983.1	141878251	141887510	+	1803	pseudogene	-	UDPGT
107855974	1172.84	614.987	790.224	317.599	302.123	287.822	859.352	302.514	1.50538	2.63042e-06	0.000140966	LOC107855974	NW_015961507.1	1237597	1240515	+	2274	protein_coding	rust resistance kinase Lr10-like	Pkinase
107867843	2631.78	2613.69	3877.28	1378.79	1201.85	1253.36	3040.92	1278	1.25073	2.64773e-06	0.000141581	LOC107867843	NC_029980.1	74751149	74753183	+	1709	protein_coding	anthocyanidin 3-O-glucoside 2'''-O-xylosyltransferase-like	UDPGT
107848459	99.6349	90.1672	122.336	23.4978	23.2402	40.1611	104.046	28.9664	1.84795	2.72863e-06	0.000145585	LOC107848459	NC_029987.1	175510259	175514958	+	2729	protein_coding	microtubule-associated protein TORTIFOLIA1%2C transcript variant X2	HEAT
107872823	1030.51	697.062	666.786	2010.2	1781.2	2510.07	798.119	2100.49	-1.39684	2.74461e-06	0.000146116	LOC107872823	NC_029982.1	32335957	32342488	-	1864	protein_coding	uncharacterized LOC107872823%2C transcript variant X3	-
107843342	2238.94	1996.4	2658.33	1171.1	1108.06	1008.21	2297.89	1095.79	1.06836	2.76642e-06	0.000146954	LOC107843342	NC_029986.1	157156954	157158848	-	1052	protein_coding	heavy metal-associated isoprenylated plant protein 3-like	HMA
107847694	88.248	134.095	156.502	39.4156	39.8404	38.4878	126.282	39.2479	1.68989	2.79057e-06	0.000147913	LOC107847694	NC_029987.1	12784586	12796671	+	4446	protein_coding	phragmoplast orienting kinesin 2%2C transcript variant X1	Kinesin
107840194	606.349	341.017	427.625	1174.89	1286.51	1145.43	458.33	1202.28	-1.39275	2.90491e-06	0.000153637	LOC107840194	NC_029984.1	143663519	143669318	-	4867	protein_coding	probable phosphoribosylformylglycinamidine synthase%2C chloroplastic/mitochondrial	-
107856758	777.152	173.399	751.65	59.1234	57.2705	126.34	567.4	80.9114	2.8102	2.91537e-06	0.000153854	LOC107856758	NW_015961755.1	8627	12716	-	2305	protein_coding	uncharacterized protein At1g04910-like	-
107859956	637.663	597.647	525.714	1180.95	1196.87	1086.86	587.008	1154.89	-0.977066	2.94475e-06	0.000155067	LOC107859956	NC_029978.1	149081814	149084198	+	2385	protein_coding	scarecrow-like protein 4	GRAS
107866542	300.328	332.925	250.183	115.973	105.411	139.727	294.479	120.37	1.29054	3.02194e-06	0.000158786	LOC107866542	NC_029977.1	7220825	7227262	-	1782	protein_coding	deoxyribodipyrimidine photo-lyase	-
107863805	126.679	95.9472	93.6807	244.074	250.662	327.146	105.436	273.961	-1.38134	3.10489e-06	0.000162792	LOC107863805	NC_029979.1	198648498	198650766	-	1850	protein_coding	heat stress transcription factor A-7a-like	HSF_DNA-bind
107840610	1013.43	841.561	595.148	239.526	294.653	123.83	816.713	219.336	1.89612	3.24602e-06	0.000169824	LOC107840610	NC_029984.1	152269730	152273120	-	2048	protein_coding	lysine histidine transporter-like 8	Aa_trans
107848446	1965.65	1714.33	1757.89	982.359	898.898	1000.68	1812.63	960.646	0.915751	3.44068e-06	0.00017962	LOC107848446	NC_029987.1	48215341	48218932	+	1176	protein_coding	uncharacterized LOC107848446	-
novel.5687	24.197	75.1394	34.1659	4.54796	6.64006	3.34676	44.5008	4.84493	3.20412	3.45759e-06	0.000180115	-	NC_029987.1	56235857	56237042	-	1018	-	PF13976:GAG-pre-integrase domain	-
107875455	145.182	131.783	176.34	50.0275	54.7805	64.4252	151.102	56.4111	1.42353	3.47648e-06	0.00018071	LOC107875455	NC_029982.1	4415512	4417066	+	1555	protein_coding	uncharacterized protein At5g39865-like	-
107877310	122.409	40.4597	69.4339	8.33792	4.98005	16.7338	77.434	10.0173	2.94909	3.51691e-06	0.000182074	LOC107877310	NC_029983.1	196061092	196061717	+	626	protein_coding	uncharacterized LOC107877310	-
107858542	230.584	695.906	417.706	90.9591	122.841	51.8748	448.065	88.5584	2.33962	3.51775e-06	0.000182074	LOC107858542	NC_029978.1	61069153	61071685	+	2132	protein_coding	protein HYPER-SENSITIVITY-RELATED 4-like	AAA
107878324	85.4013	147.967	145.481	26.5297	24.9002	45.1813	126.283	32.2038	1.97591	3.66943e-06	0.00018952	LOC107878324	NC_029983.1	196043949	196049551	+	1247	protein_coding	secretory carrier-associated membrane protein 1	-
107874685	22.7737	138.719	57.3105	6.82193	4.15004	9.2036	72.9344	6.72519	3.44241	3.74807e-06	0.000193169	LOC107874685	NC_029982.1	12343904	12347647	-	1257	protein_coding	binding partner of ACD11 1-like	RRM_1
107877282	28.4671	126.003	135.561	9.09591	16.6002	10.0403	96.6772	11.9121	3.02637	3.78946e-06	0.000194888	LOC107877282	NC_029983.1	192576308	192578010	+	1110	protein_coding	myb-related protein Myb4-like	Myb_DNA-binding
107848353	176.496	396.505	259	84.1372	87.9808	69.4453	277.333	80.5211	1.7855	3.80293e-06	0.000195166	LOC107848353	NC_029987.1	218547173	218548507	-	1335	protein_coding	uncharacterized LOC107848353	-
107854335	206.387	239.29	266.714	103.845	97.9409	69.4453	237.464	90.4104	1.39349	3.83184e-06	0.000196234	LOC107854335	NW_015961146.1	3426	4530	+	970	protein_coding	glutathione S-transferase U10-like	GST_N
107864034	130.949	195.362	187.361	56.0915	41.5004	68.6086	171.224	55.4002	1.63018	3.85199e-06	0.000196849	LOC107864034	NC_029979.1	232128568	232133586	-	1700	protein_coding	caffeoylshikimate esterase-like%2C transcript variant X1	-
107867539	93.9415	186.114	229.242	46.9955	43.1604	43.5079	169.766	44.5546	1.93278	3.87365e-06	0.00019754	LOC107867539	NC_029980.1	30728823	30731155	+	2167	protein_coding	uncharacterized protein DDB_G0288805-like	-
107854299	28.4671	9.24792	17.634	105.361	86.3208	71.1187	18.4497	87.6002	-2.26665	3.89373e-06	0.000198147	LOC107854299	NC_029977.1	45545946	45547606	+	1661	protein_coding	probable calcium-binding protein CML23	-
107874964	175.073	306.337	244.672	79.5892	48.1404	87.0158	242.027	71.5818	1.75854	3.9572e-06	0.000200955	LOC107874964	NC_029982.1	72321014	72322053	+	821	protein_coding	classical arabinogalactan protein 1-like	-
107861607	609.196	454.304	418.808	201.626	229.082	188.255	494.103	206.321	1.25867	3.98959e-06	0.000202175	LOC107861607	NC_029979.1	559475	564577	+	3647	protein_coding	glutamate receptor 2.8-like	ANF_receptor
107860523	176.496	147.967	131.153	55.3335	61.4206	61.0784	151.872	59.2775	1.35524	4.01546e-06	0.000203061	LOC107860523	NC_029978.1	159651288	159654760	-	2073	protein_coding	cyclic dof factor 3-like	zf-Dof
107875668	101.058	13.8719	98.0892	3.78996	5.81005	7.53022	71.0064	5.71008	3.63913	4.24781e-06	0.000214364	LOC107875668	NC_029982.1	9560648	9568069	+	2687	protein_coding	probable DNA double-strand break repair Rad50 ATPase%2C transcript variant X1	-
107860172	230.584	145.655	305.289	71.2513	53.9505	75.3022	227.176	66.8347	1.76518	4.36789e-06	0.000219965	LOC107860172	NC_029978.1	153169365	153173861	+	1941	protein_coding	ACT domain-containing protein ACR1%2C transcript variant X2	ACT
107842511	1000.62	891.268	1026.08	518.467	526.225	508.708	972.655	517.8	0.909445	4.47998e-06	0.000225142	LOC107842511	NC_029985.1	95131396	95137801	+	1261	protein_coding	R3H domain-containing protein 4%2C transcript variant X1	R3H
107853718	643.357	560.655	665.684	299.407	327.853	317.942	623.232	315.068	0.98416	4.54422e-06	0.000227898	LOC107853718	NW_015960950.1	696235	705420	+	1938	protein_coding	nudix hydrolase 2-like%2C transcript variant X2	NUDIX
107838934	1158.61	1545.56	1437.17	489.663	662.346	363.124	1380.45	505.044	1.45088	4.60157e-06	0.000230297	LOC107838934	NC_029984.1	56871329	56878727	-	2072	protein_coding	ferrochelatase-2%2C chloroplastic-like	-
107843164	17.0803	13.8719	6.61275	78.8312	161.851	44.3446	12.5216	95.0091	-2.93728	4.62441e-06	0.000230963	LOC107843164	NC_029985.1	236121224	236125553	+	2107	protein_coding	probable glycosyltransferase At5g03795	-
107850975	143.759	339.861	250.183	59.1234	74.7007	72.7921	244.601	68.8721	1.83101	4.65027e-06	0.000231777	LOC107850975	NC_029988.1	20896677	20898378	+	1702	protein_coding	scopoletin glucosyltransferase-like	UDPGT
107874824	2.84671	45.0836	27.5531	0	0	0	25.1612	0	7.40941	4.72416e-06	0.000234976	LOC107874824	NC_029982.1	29514812	29516226	+	713	protein_coding	uncharacterized LOC107874824	-
107877233	105.328	11.5599	207.2	7.57993	0	1.67338	108.029	3.08444	5.11429	4.77655e-06	0.000237095	LOC107877233	NC_029983.1	181356277	181357676	+	1211	protein_coding	glycine-rich cell wall structural protein 1-like	-
novel.4395	19.927	255.474	91.4764	6.82193	8.30008	12.5504	122.292	9.22412	3.73278	4.79039e-06	0.000237296	-	NC_029985.1	10005053	10006729	+	526	-	PF06376:Arabinogalactan peptide	-
107848251	532.335	21.9638	246.876	17.4338	14.1101	22.5906	267.058	18.0449	3.88672	4.83666e-06	0.000239099	LOC107848251	NC_029977.1	267923464	267935621	+	2434	pseudogene	-	-
107858099	482.517	295.933	641.437	136.439	156.871	161.481	473.296	151.597	1.64291	4.93726e-06	0.000243575	LOC107858099	NC_029978.1	131177362	131181520	+	3626	protein_coding	probable LRR receptor-like serine/threonine-protein kinase At3g47570	LRRNT_2
107870362	92.5181	100.571	116.825	42.4476	32.3703	29.2842	103.305	34.7007	1.57328	5.09438e-06	0.000250816	LOC107870362	NC_029981.1	16646134	16647890	+	1757	pseudogene	-	SAM_decarbox
107855100	27.0438	141.031	46.2893	5.30595	7.47007	9.2036	71.4546	7.32654	3.29219	5.1446e-06	0.000252774	LOC107855100	NW_015961339.1	551056	552978	+	910	protein_coding	transcription factor UPBEAT1	-
107841985	126.679	144.499	99.1913	280.457	282.203	317.942	123.456	293.534	-1.2506	5.33954e-06	0.000261821	LOC107841985	NC_029985.1	16965289	16967829	+	2541	protein_coding	nuclear transcription factor Y subunit B-3-like	-
107862494	701.714	164.151	395.663	84.1372	63.0806	92.036	420.509	79.7512	2.39741	5.35447e-06	0.000262023	LOC107862494	NC_029979.1	18394047	18405536	+	1672	protein_coding	uncharacterized LOC107862494%2C transcript variant X1	-
107840216	1111.64	571.059	736.22	2086	2266.75	2217.23	806.307	2189.99	-1.44237	5.69031e-06	0.000277896	LOC107840216	NC_029984.1	144360939	144378932	+	7018	protein_coding	DNA repair protein REV1%2C transcript variant X2	IMS
107867462	947.955	2001.02	1498.89	526.047	543.655	426.712	1482.62	498.805	1.57191	5.79859e-06	0.000282614	LOC107867462	NC_029980.1	24415510	24426875	-	3184	protein_coding	F-box protein At1g78280%2C transcript variant X2	-
107877685	163.686	434.652	185.157	69.7353	62.2506	46.018	261.165	59.3346	2.13831	5.83823e-06	0.000283975	LOC107877685	NC_029983.1	12969709	12971770	+	832	protein_coding	uncharacterized LOC107877685%2C transcript variant X2	-
107843874	93.9415	55.4875	78.2509	203.142	186.752	232.6	75.8933	207.498	-1.45575	5.94437e-06	0.000288558	LOC107843874	NC_029986.1	201911954	201915280	-	1266	protein_coding	two-component response regulator ORR9-like	Response_reg
107850776	61.2043	92.4792	99.1913	273.635	223.272	203.316	84.2916	233.408	-1.46406	5.96336e-06	0.000288901	LOC107850776	NC_029988.1	226866982	226868345	+	923	protein_coding	glycine-rich RNA-binding protein GRP1A-like	RRM_1
107840181	35.5839	157.215	191.77	14.4019	22.4102	6.69352	128.189	14.5019	3.14621	6.14702e-06	0.000297204	LOC107840181	NC_029984.1	143438080	143438814	+	735	protein_coding	uncharacterized LOC107840181	-
107853624	200.693	131.783	189.566	68.2193	52.2905	66.9352	174.014	62.4817	1.47576	6.16494e-06	0.000297477	LOC107853624	NC_029977.1	28847488	28848739	-	1252	protein_coding	abscisic acid receptor PYR1-like	-
107877342	253.357	412.689	155.4	68.9773	81.3407	44.3446	273.815	64.8876	2.07683	6.19071e-06	0.000298126	LOC107877342	NC_029983.1	207411310	207413984	-	2675	pseudogene	-	Pkinase_Tyr
107865995	65.4743	108.663	114.621	28.8037	12.4501	25.1007	96.2528	22.1182	2.12215	6.25464e-06	0.000299551	LOC107865995	NC_029979.1	21434736	21436177	-	1215	protein_coding	uncharacterized LOC107865995	-
107840858	432.7	1346.73	689.931	207.69	205.012	205.826	823.12	206.176	1.99771	6.25731e-06	0.000299551	LOC107840858	NC_029985.1	4967156	4971642	+	1732	protein_coding	probable protein phosphatase 2C 27	PP2C
107843656	298.905	388.413	284.348	141.745	113.711	148.094	323.889	134.517	1.26788	6.2574e-06	0.000299551	LOC107843656	NC_029986.1	193245869	193246989	-	1121	protein_coding	zinc finger A20 and AN1 domain-containing stress-associated protein 4-like	zf-A20
107840576	74.0145	175.711	73.8424	15.9178	24.9002	25.1007	107.856	21.9729	2.29929	6.3649e-06	0.000304097	LOC107840576	NC_029984.1	151704720	151706416	+	1598	protein_coding	probable BOI-related E3 ubiquitin-protein ligase 2	-
107875407	318.832	317.897	290.961	162.21	142.761	147.258	309.23	150.743	1.03565	6.76196e-06	0.000322431	LOC107875407	NC_029982.1	3509250	3512640	+	1634	protein_coding	trans-cinnamate 4-monooxygenase-like	p450
107861758	3252.37	9296.47	4200.2	1362.11	1670.81	1233.28	5583.01	1422.07	1.97312	6.84017e-06	0.000325519	LOC107861758	NC_029979.1	2873460	2874385	-	926	protein_coding	ESCRT-related protein CHMP1A	ESCRT-III
novel.4917	2.84671	0	3.30638	26.5297	25.7302	40.9978	2.05103	31.0859	-3.93792	6.96876e-06	0.00033086	-	NC_029986.1	47278315	47281753	+	3379	-	PF13456:Reverse transcriptase-like	-
107844355	5.69342	122.535	20.9404	1.51599	0.830008	0.836691	49.7229	1.06089	5.54318	6.97971e-06	0.00033086	LOC107844355	NC_029986.1	115160646	115161218	+	573	protein_coding	uncharacterized LOC107844355	-
107849590	78.2845	34.6797	39.6765	2.27398	4.15004	10.877	50.8803	5.767	3.14644	7.04933e-06	0.000333508	LOC107849590	NC_029988.1	202199797	202201142	-	1346	protein_coding	transcription repressor OFP13	-
107850602	1115.91	1062.36	943.42	528.321	541.995	404.122	1040.56	491.479	1.08174	7.45667e-06	0.000352092	LOC107850602	NC_029988.1	3119047	3121924	+	1386	protein_coding	S-adenosylmethionine synthase 2	-
107851584	1605.54	775.669	1149.52	385.818	337.813	466.873	1176.91	396.835	1.56798	7.53236e-06	0.000354973	LOC107851584	NC_029988.1	218594254	218596380	-	2127	protein_coding	uncharacterized LOC107851584	-
107838774	15.6569	33.5237	26.451	0	1.66002	0	25.2105	0.553338	5.54806	7.61808e-06	0.000358316	LOC107838774	NC_029984.1	1841396	1843352	-	1957	protein_coding	U-box domain-containing protein 21-like	U-box
107879425	2907.91	2587.11	2056.57	1233.25	1251.65	1071.8	2517.2	1185.57	1.08597	7.68754e-06	0.000360882	LOC107879425	NC_029977.1	151306540	151308181	+	1642	protein_coding	RING-H2 finger protein ATL2	-
107861500	74.0145	190.738	133.357	36.3836	21.5802	34.3043	132.703	30.7561	2.11091	7.78362e-06	0.000364686	LOC107861500	NC_029978.1	163285961	163286497	+	537	protein_coding	uncharacterized LOC107861500	-
107875686	160.839	271.658	196.178	52.3015	26.5602	74.4655	209.558	51.1091	2.03671	7.85271e-06	0.000367213	LOC107875686	NC_029982.1	10028042	10029996	+	1930	protein_coding	aspartic proteinase nepenthesin-2	-
107863792	876.787	203.454	2127.1	146.293	131.971	106.26	1069.11	128.174	3.06024	7.92853e-06	0.000370044	LOC107863792	NC_029979.1	195891098	195902459	-	3254	protein_coding	sulfate transporter 3.1-like%2C transcript variant X2	STAS
107851945	56.9342	112.131	92.5786	15.1599	28.2203	20.0806	87.2146	21.1536	2.05022	8.02726e-06	0.000373931	LOC107851945	NW_015960335.1	4226	5948	-	830	protein_coding	2-isopropylmalate synthase A	-
107843398	540.875	272.814	317.412	112.183	93.7909	144.747	377.034	116.907	1.68795	8.7731e-06	0.000407642	LOC107843398	NC_029986.1	165007293	165012763	+	2249	protein_coding	serine/threonine-protein kinase STN8%2C chloroplastic	Pkinase
107853560	48.3941	153.747	70.5361	17.4338	13.2801	19.2439	90.8923	16.6526	2.45105	8.78458e-06	0.000407642	LOC107853560	NW_015960900.1	229666	230955	+	1290	protein_coding	ENHANCER OF AG-4 protein 2-like	-
107863223	111.022	175.711	124.54	338.065	353.583	314.596	137.091	335.415	-1.28837	8.80649e-06	0.000407877	LOC107863223	NC_029979.1	50927580	50929043	-	1464	protein_coding	putative septum site-determining protein minD homolog%2C chloroplastic	CbiA
107854232	31.3138	23.1198	20.9404	146.293	320.383	57.7317	25.1247	174.802	-2.80307	8.94175e-06	0.000413351	LOC107854232	NW_015961127.1	225437	231649	+	1910	protein_coding	cytochrome P450 CYP72A219-like	p450
107875071	21.3503	30.0557	39.6765	4.54796	2.49002	5.02014	30.3609	4.01937	2.92117	9.02183e-06	0.000415807	LOC107875071	NC_029982.1	175693861	175696012	-	2152	protein_coding	ethylene-responsive transcription factor CRF4-like	AP2
107870153	4728.39	13261.5	6819.95	2264.12	2558.08	2043.2	8269.95	2288.47	1.85354	9.0292e-06	0.000415807	LOC107870153	NC_029977.1	23539019	23542049	+	2567	protein_coding	glycine-rich protein A3	-
107844023	529.488	520.196	456.28	236.494	185.092	261.884	501.988	227.823	1.13926	9.09524e-06	0.000418053	LOC107844023	NC_029986.1	204743078	204747691	+	1735	protein_coding	cytochrome P450 98A2-like	p450
107845825	795.656	371.073	746.139	212.238	185.922	223.396	637.623	207.185	1.6213	9.12672e-06	0.000418706	LOC107845825	NC_029986.1	122667930	122668979	+	1050	protein_coding	calcium-binding protein CAST-like	-
107847804	1404.85	1892.36	1594.78	670.824	855.738	564.766	1630.66	697.109	1.22621	9.4694e-06	0.000433605	LOC107847804	NC_029977.1	258928065	258931572	+	3426	protein_coding	receptor-like protein kinase HSL1	LRR_1
107855495	513.831	373.385	568.697	212.996	204.182	216.703	485.304	211.294	1.1995	9.5016e-06	0.000433924	LOC107855495	NW_015961390.1	205211	211045	-	3359	protein_coding	proline-rich receptor-like protein kinase PERK8	Pkinase
107878624	2717.19	1679.65	2768.54	951.281	1070.71	910.319	2388.46	977.437	1.28892	9.51219e-06	0.000433924	LOC107878624	NC_029983.1	214515811	214521163	-	1982	protein_coding	uncharacterized LOC107878624	Na_Ca_ex
107868599	192.153	94.7912	338.353	22.7398	29.0503	56.895	208.432	36.2283	2.52662	9.77467e-06	0.00044506	LOC107868599	NC_029980.1	8864510	8872550	+	2500	protein_coding	uncharacterized LOC107868599	-
novel.4118	37.0072	26.5878	34.1659	90.9591	107.901	87.8525	32.587	95.5709	-1.55666	9.84593e-06	0.000447463	-	NC_029984.1	114033485	114035718	+	2234	-	-	-
107843865	5.69342	4.62396	3.30638	26.5297	48.1404	30.9576	4.54125	35.2092	-2.97269	1.01043e-05	0.000458347	LOC107843865	NC_029986.1	201648721	201651406	+	1728	protein_coding	regulatory protein NPR5-like	BTB
107840132	657.59	605.739	523.51	1219.61	1225.92	1065.94	595.613	1170.49	-0.975482	1.01681e-05	0.000460376	LOC107840132	NC_029984.1	142005978	142015020	-	2382	protein_coding	fatty acid amide hydrolase-like	Amidase
107860435	79.7079	77.4513	41.8808	208.448	261.452	168.175	66.3467	212.692	-1.68541	1.0233e-05	0.000462453	LOC107860435	NC_029978.1	158135297	158138455	-	2882	protein_coding	receptor-like protein kinase FERONIA	Pkinase_Tyr
107859396	485.364	1087.79	865.169	280.457	273.902	266.904	812.773	273.755	1.57065	1.06409e-05	0.000479988	LOC107859396	NC_029978.1	136781370	136782881	-	1023	protein_coding	tetraspanin-19-like	Tetraspannin
107854291	337.335	397.661	869.577	129.617	171.812	97.8928	534.858	133.107	2.00737	1.07199e-05	0.000482656	LOC107854291	NW_015961130.1	319263	323431	+	2615	protein_coding	phenylalanine ammonia-lyase	-
107875406	335.912	315.585	199.485	113.699	107.901	106.26	283.661	109.287	1.37427	1.17811e-05	0.00052945	LOC107875406	NC_029982.1	3498379	3501720	+	1797	protein_coding	trans-cinnamate 4-monooxygenase	p450
107878080	1641.13	1623.01	2034.52	764.815	985.219	793.183	1766.22	847.739	1.05924	1.1834e-05	0.000530844	LOC107878080	NC_029983.1	157829667	157832239	+	1150	protein_coding	probable E3 ubiquitin-protein ligase XERICO%2C transcript variant X1	-
107857140	78.2845	25.4318	220.425	12.1279	12.4501	9.2036	108.047	11.2605	3.2632	1.18917e-05	0.000532444	LOC107857140	NC_029977.1	208916767	208917705	-	939	protein_coding	monothiol glutaredoxin-S3-like	-
novel.5684	327.372	273.97	360.395	673.855	600.925	733.778	320.579	669.52	-1.0624	1.1919e-05	0.000532683	-	NC_029987.1	54768462	54773795	-	5243	-	PF00266:Aminotransferase class-V|PF00069:Protein kinase domain|PF00004:ATPase family associated with various cellular activities (AAA)	Pkinase
107850670	170.803	152.591	135.561	48.5115	17.4302	49.3647	152.985	38.4355	1.99069	1.20448e-05	0.000537313	LOC107850670	NC_029988.1	228351323	228361946	+	2641	protein_coding	E3 ubiquitin-protein ligase COP1-like	WD40
107864180	58.3576	157.215	126.744	28.0457	29.8803	25.9374	114.106	27.9545	2.03303	1.20731e-05	0.000537585	LOC107864180	NC_029979.1	238881369	238883901	+	1298	protein_coding	myb-related protein Myb4-like	Myb_DNA-binding
novel.5195	8.54013	2.31198	6.61275	36.3836	34.0303	42.6712	5.82162	37.6951	-2.71939	1.23549e-05	0.000549123	-	NC_029986.1	116569153	116585615	-	2096	-	-	-
107858957	72.5911	53.1756	80.4552	173.58	177.622	163.155	68.7406	171.452	-1.31912	1.25518e-05	0.000556852	LOC107858957	NC_029978.1	117916082	117923813	-	1882	lncRNA	uncharacterized LOC107858957%2C transcript variant X3	-
107843084	580.729	512.104	1821.81	163.726	158.531	251.844	971.549	191.367	2.34446	1.27381e-05	0.000564084	LOC107843084	NC_029985.1	232866368	232871106	-	1061	protein_coding	cytokinin riboside 5'-monophosphate phosphoribohydrolase LOG3	-
107873000	111.022	169.931	195.076	39.4156	46.4804	64.4252	158.676	50.1071	1.66728	1.28201e-05	0.000566117	LOC107873000	NC_029982.1	48576274	48587307	-	4853	protein_coding	uncharacterized LOC107873000	-
107865861	9.96349	208.078	26.451	4.54796	1.66002	0	81.4976	2.06932	5.28363	1.28347e-05	0.000566117	LOC107865861	NC_029979.1	8221137	8222704	-	1568	protein_coding	F-box protein At3g07870-like	F-box
107879695	331.642	19.6518	100.293	4.54796	14.9401	0.836691	150.529	6.77493	4.47371	1.28541e-05	0.000566117	LOC107879695	NC_029984.1	101219313	101222210	+	1039	protein_coding	WRKY transcription factor 18-like	WRKY
107859199	1095.98	775.669	713.075	390.366	361.883	387.388	861.576	379.879	1.18052	1.29768e-05	0.000570485	LOC107859199	NC_029978.1	129984628	129987464	+	2836	protein_coding	U-box domain-containing protein 17-like	Arm
107839646	68.3211	135.251	145.481	34.1097	27.3902	35.9777	116.351	32.4925	1.84414	1.30995e-05	0.000574834	LOC107839646	NC_029984.1	132688020	132690006	-	1065	protein_coding	F-box protein PP2-B15-like%2C transcript variant X2	F-box
107849818	2870.91	3715.35	4139.58	1497.79	1577.01	1884.23	3575.28	1653.01	1.11318	1.35043e-05	0.000591526	LOC107849818	NC_029977.1	287854411	287859554	-	1759	protein_coding	pectin acetylesterase 8-like%2C transcript variant X1	-
107858931	526.641	463.552	200.587	112.941	125.331	92.036	396.927	110.103	1.84885	1.35607e-05	0.000592926	LOC107858931	NC_029978.1	114808209	114809963	+	1755	protein_coding	uncharacterized LOC107858931	-
107879615	15.6569	58.9555	45.1872	1.51599	6.64006	1.67338	39.9332	3.27648	3.6213	1.37435e-05	0.000599837	LOC107879615	NC_029984.1	19020542	19022279	-	1738	protein_coding	phospholipase A1-Igamma1%2C chloroplastic	Lipase_3
107878349	1907.3	1739.77	3007.7	936.879	926.288	753.858	2218.25	872.342	1.34659	1.38039e-05	0.000601386	LOC107878349	NC_029983.1	198240817	198250231	-	1212	protein_coding	probable protein phosphatase 2C 58	PP2C
107843464	83.978	690.126	90.3743	24.2558	30.7103	5.02014	288.159	19.9954	3.84875	1.38962e-05	0.000604322	LOC107843464	NC_029986.1	173253931	173255843	+	1913	protein_coding	uncharacterized LOC107843464	-
107874649	81.1313	270.502	257.897	49.2695	34.8603	47.6914	203.177	43.9404	2.21093	1.40696e-05	0.000610765	LOC107874649	NC_029982.1	8947399	8948772	-	644	protein_coding	putative phytosulfokines 6	-
107872990	8293.89	15447.5	7531.93	3564.84	3163.16	4004.4	10424.4	3577.47	1.54298	1.42172e-05	0.000616069	LOC107872990	NC_029982.1	47714249	47716696	-	1178	protein_coding	photosystem II 22 kDa protein%2C chloroplastic	-
107871208	910.947	865.837	579.718	116.731	328.683	134.707	785.501	193.374	2.02241	1.42984e-05	0.000618482	LOC107871208	NC_029981.1	202726701	202729143	+	481	protein_coding	60S ribosomal protein L29-2-like%2C transcript variant X1	-
107873826	19.927	134.095	79.3531	10.6119	9.96009	7.53022	77.7916	9.3674	3.05626	1.45846e-05	0.000629738	LOC107873826	NC_029982.1	6623767	6627999	-	1216	protein_coding	zinc finger protein 667-like	-
107870120	994.925	707.466	739.526	232.704	100.431	310.412	813.973	214.516	1.92358	1.46582e-05	0.000631787	LOC107870120	NC_029981.1	2902535	2916416	+	1768	protein_coding	heavy metal-associated isoprenylated plant protein 3-like%2C transcript variant X3	HMA
107852610	307.445	195.362	268.919	93.9911	71.3806	114.627	257.242	93.3328	1.46158	1.4719e-05	0.000633282	LOC107852610	NW_015960552.1	163722	166660	-	2939	protein_coding	leucine-rich repeat extensin-like protein 4%2C transcript variant X2	LRRNT_2
107867280	152.299	276.282	176.34	69.7353	65.5706	76.9755	201.64	70.7605	1.51251	1.4771e-05	0.000634392	LOC107867280	NC_029980.1	12620320	12623728	+	2631	protein_coding	G-type lectin S-receptor-like serine/threonine-protein kinase At4g27290	Pkinase_Tyr
107855125	2324.34	4229.77	3483.82	1381.06	1237.54	1442.45	3345.98	1353.69	1.30571	1.48376e-05	0.000636125	LOC107855125	NW_015961339.1	486250	487000	-	751	protein_coding	calvin cycle protein CP12-2%2C chloroplastic	-
107859361	101.058	113.287	112.417	243.316	249.002	210.009	108.921	234.109	-1.10228	1.52152e-05	0.000651164	LOC107859361	NC_029978.1	135903042	135904918	+	1877	protein_coding	cysteine desulfurase%2C mitochondrial-like	Aminotran_5
107852852	75.4378	46.2396	40.7787	185.708	253.982	129.687	54.152	189.793	-1.81701	1.5421e-05	0.000658805	LOC107852852	NW_015960668.1	177106	182757	-	2898	protein_coding	G-type lectin S-receptor-like serine/threonine-protein kinase At4g27290	B_lectin
107858516	32.7372	19.6518	8.81701	82.6212	83.0008	128.014	20.402	97.8785	-2.28193	1.54744e-05	0.000659922	LOC107858516	NC_029978.1	55626499	55628947	-	1355	protein_coding	galactinol synthase 2-like	Glyco_transf_8
107858704	71.1678	61.2675	144.378	16.6758	14.9401	27.6108	92.2712	19.7423	2.22891	1.55605e-05	0.000662427	LOC107858704	NC_029978.1	92356021	92358558	-	1377	protein_coding	calcium uniporter protein 2%2C mitochondrial-like	-
107866206	18.5036	84.3873	23.1446	3.78996	4.15004	3.34676	42.0118	3.76225	3.48459	1.56763e-05	0.000665498	LOC107866206	NC_029979.1	79555279	79556580	+	1302	protein_coding	21 kDa protein-like	-
107853439	78.2845	413.845	552.165	53.0595	59.7605	46.8547	348.098	53.2249	2.71048	1.56875e-05	0.000665498	LOC107853439	NC_029977.1	22217572	22219495	+	743	protein_coding	heavy metal-associated isoprenylated plant protein 22-like	HMA
107873498	431.277	509.792	740.629	216.786	186.752	249.334	560.566	217.624	1.36603	1.5717e-05	0.000665581	LOC107873498	NC_029982.1	194769127	194772961	-	1153	protein_coding	expansin-A6-like	-
107858667	28.4671	18.4958	17.634	2.27398	1.66002	1.67338	21.5323	1.86912	3.51236	1.5895e-05	0.000671946	LOC107858667	NC_029977.1	171032761	171049296	-	2019	pseudogene	-	-
107878490	362.956	119.067	221.527	68.9773	56.4405	38.4878	234.517	54.6352	2.09889	1.6048e-05	0.000676213	LOC107878490	NC_029983.1	209639991	209670835	+	1878	protein_coding	xyloglucan endotransglucosylase/hydrolase protein 15-like%2C transcript variant X1	-
107859383	59.7809	61.2675	26.451	8.33792	9.96009	10.0403	49.1665	9.4461	2.37743	1.60518e-05	0.000676213	LOC107859383	NC_029978.1	136576742	136579648	+	1188	protein_coding	uncharacterized LOC107859383	-
107862424	179.343	286.686	352.68	91.7171	106.241	92.036	272.903	96.6647	1.49972	1.61835e-05	0.000680578	LOC107862424	NC_029979.1	16719898	16723517	-	1088	protein_coding	LIM domain-containing protein WLIM1-like%2C transcript variant X2	LIM
107840027	226.313	121.379	1150.62	56.8495	67.2306	31.7942	499.437	51.9581	3.26518	1.62151e-05	0.000680727	LOC107840027	NC_029984.1	139958529	139960286	+	1195	protein_coding	peroxidase N1-like	-
107869212	1513.03	1516.66	1483.46	852.742	887.278	734.614	1504.38	824.878	0.86683	1.62634e-05	0.00068096	LOC107869212	NC_029977.1	17001761	17006126	+	2731	protein_coding	type I inositol polyphosphate 5-phosphatase 2-like	Exo_endo_phos
107878156	246.24	469.332	466.199	122.795	83.8308	154.788	393.924	120.471	1.71045	1.62769e-05	0.00068096	LOC107878156	NC_029983.1	169540839	169542735	+	1112	protein_coding	fasciclin-like arabinogalactan protein 7	-
107861740	8108.86	6946.35	6269.99	3875.62	2331.49	2607.96	7108.4	2938.36	1.27441	1.64111e-05	0.00068539	LOC107861740	NC_029979.1	2496237	2502978	-	3247	protein_coding	beta-galactosidase	-
novel.4681	5.69342	2.31198	2.20425	34.1097	24.0702	30.1209	3.40322	29.4336	-3.16337	1.65292e-05	0.000689135	-	NC_029985.1	38583991	38603385	-	769	-	-	-
107870541	7.11678	46.2396	6.61275	0	0	0	19.9897	0	7.07576	1.65732e-05	0.00068978	LOC107870541	NC_029981.1	34598316	34599920	+	1605	protein_coding	U-box domain-containing protein 21-like	U-box
107870395	64.051	28.8998	29.7574	150.841	141.101	128.014	40.9027	139.985	-1.78941	1.6893e-05	0.000701885	LOC107870395	NC_029981.1	21464614	21468403	-	2019	protein_coding	transcription factor DIVARICATA-like	Myb_DNA-binding
107850465	165.109	332.925	174.136	668.55	732.067	581.5	224.057	660.705	-1.55888	1.71201e-05	0.000709751	LOC107850465	NC_029977.1	295028563	295036287	-	3417	protein_coding	disease resistance protein RPM1-like	NB-ARC
novel.1292	157.992	655.446	376.927	95.5071	87.9808	75.3022	396.789	86.2633	2.20233	1.71409e-05	0.000709751	-	NC_029979.1	19015650	19019676	+	2305	-	PF04043:Plant invertase/pectin methylesterase inhibitor	-
107848014	45.5474	127.159	90.3743	9.09591	9.13008	25.1007	87.6935	14.4422	2.60877	1.72496e-05	0.000713032	LOC107848014	NC_029987.1	14727101	14766023	-	2973	protein_coding	alpha-xylosidase 1-like	Glyco_hydro_31
107869873	328.795	356.045	185.157	745.107	754.477	777.286	289.999	758.956	-1.38915	1.74676e-05	0.000720812	LOC107869873	NC_029980.1	211711586	211716124	-	1640	protein_coding	uncharacterized LOC107869873	Na_Ca_ex
107852961	34.1605	413.845	126.744	15.1599	13.2801	26.7741	191.583	18.4047	3.38188	1.75305e-05	0.000722178	LOC107852961	NW_015960687.1	646491	654804	-	1465	protein_coding	probable trehalose-phosphate phosphatase H%2C transcript variant X2	-
novel.3274	19.927	23.1198	12.1234	0	0	0.836691	18.3901	0.278897	5.98788	1.76783e-05	0.000727032	-	NC_029982.1	3341991	3343020	-	965	-	-	-
107861429	27.0438	3.46797	31.9616	138.713	154.381	115.463	20.8245	136.186	-2.71284	1.77841e-05	0.000728731	LOC107861429	NC_029978.1	158131697	158134787	-	2856	protein_coding	receptor-like protein kinase FERONIA	Pkinase_Tyr
novel.5058	64.051	53.1756	115.723	11.3699	11.6201	24.264	77.6499	15.7513	2.3071	1.78053e-05	0.000728731	-	NC_029986.1	188718513	188719303	+	791	-	PF02519:Auxin responsive protein	Auxin_inducible
107855006	29.8905	175.711	90.3743	18.1918	10.7901	11.7137	98.6584	13.5652	2.86286	1.78099e-05	0.000728731	LOC107855006	NC_029977.1	72861135	72862665	-	914	protein_coding	inactive protein RESTRICTED TEV MOVEMENT 2-like	-
107858739	1938.61	1990.62	1658.7	3299.54	3313.39	3406.17	1862.64	3339.7	-0.842518	1.78734e-05	0.000730097	LOC107858739	NC_029978.1	96040966	96047001	-	3293	protein_coding	KH domain-containing protein At4g18375	KH_1
novel.1122	126.679	227.73	131.153	62.9134	45.6504	40.9978	161.854	49.8539	1.69855	1.79844e-05	0.000733396	-	NC_029978.1	129127077	129135045	-	636	-	-	-
107856343	32.7372	92.4792	71.6382	12.8859	11.6201	15.8971	65.6182	13.4677	2.29069	1.80764e-05	0.000735909	LOC107856343	NW_015961630.1	243558	244664	+	925	protein_coding	early nodulin-like protein 3	Cu_bind_like
107845045	237.7	173.399	154.298	424.476	441.564	409.142	188.465	425.061	-1.17694	1.83313e-05	0.000745032	LOC107845045	NC_029986.1	3356256	3359356	+	3101	protein_coding	septin and tuftelin-interacting protein 1 homolog 1	G-patch
107874941	59.7809	1.15599	162.012	2.27398	1.66002	0	74.3165	1.31133	5.81191	1.83931e-05	0.000746292	LOC107874941	NC_029982.1	59164458	59165115	-	658	protein_coding	monothiol glutaredoxin-S3-like	-
107866444	835.51	1110.91	680.012	287.279	390.934	185.745	875.476	287.986	1.60403	1.8658e-05	0.000755773	LOC107866444	NC_029979.1	235660628	235663310	+	2683	protein_coding	G-type lectin S-receptor-like serine/threonine-protein kinase RLK1	Pkinase
107847530	2204.78	1221.88	2049.95	752.687	762.777	558.909	1825.54	691.458	1.40037	1.8715e-05	0.00075681	LOC107847530	NC_029987.1	214884416	214891976	-	4601	protein_coding	putative phospholipid-transporting ATPase 9%2C transcript variant X1	-
107861226	27.0438	80.9193	52.902	10.6119	9.13008	10.0403	53.6217	9.92742	2.43809	1.87461e-05	0.00075681	LOC107861226	NC_029978.1	136987744	136988990	-	1247	protein_coding	dof zinc finger protein DOF4.6-like	zf-Dof
107873998	301.751	313.273	257.897	582.138	624.166	522.095	290.974	576.133	-0.98621	1.89024e-05	0.000761852	LOC107873998	NC_029977.1	50313785	50315947	-	2085	protein_coding	uncharacterized LOC107873998	-
107840491	2223.28	1412.62	1954.07	891.399	736.217	860.118	1863.32	829.245	1.16772	1.89445e-05	0.000762281	LOC107840491	NC_029984.1	150087357	150090941	+	2321	protein_coding	uncharacterized LOC107840491%2C transcript variant X2	bZIP_1
107839789	99.6349	91.3232	112.417	288.795	197.542	240.13	101.125	242.156	-1.25956	1.93308e-05	0.000776535	LOC107839789	NC_029977.1	173056854	173058933	+	2080	protein_coding	serine/threonine-protein kinase-like protein At3g51990	Pkinase
107879806	85.4013	654.29	235.855	33.3517	53.9505	48.5281	325.182	45.2767	2.8459	1.93982e-05	0.000777953	LOC107879806	NC_029984.1	131060774	131062017	-	1048	protein_coding	cyclin-U4-1-like	-
novel.6719	4.27007	0	0	28.8037	25.7302	29.2842	1.42336	27.9394	-4.47294	1.94811e-05	0.000779984	-	NW_015960988.1	533857	536843	-	2987	-	-	-
107848677	112.445	106.351	62.8212	253.17	356.903	224.233	93.8724	278.102	-1.57027	1.95637e-05	0.000782	LOC107848677	NC_029987.1	202820519	202823305	+	1789	protein_coding	7-deoxyloganetic acid glucosyltransferase-like	UDPGT
107846179	72.5911	352.577	60.6169	14.4019	28.2203	10.0403	161.928	17.5541	3.20699	1.96458e-05	0.000783986	LOC107846179	NC_029977.1	230955959	230958601	-	1696	protein_coding	syntaxin-121-like	SNARE
107846237	59.7809	197.674	93.6807	22.7398	29.8803	19.2439	117.045	23.9546	2.2914	1.96808e-05	0.000784094	LOC107846237	NC_029977.1	231088192	231089692	-	1499	protein_coding	E3 ubiquitin-protein ligase PUB23-like	U-box
107873392	378.613	2103.9	1280.67	247.864	272.242	198.296	1254.39	239.467	2.38938	2.04857e-05	0.000813712	LOC107873392	NC_029982.1	166736912	166738015	+	1104	protein_coding	protein SRC2-like	C2
107852173	596.386	337.549	417.706	160.694	133.631	201.642	450.547	165.323	1.44534	2.04914e-05	0.000813712	LOC107852173	NW_015960422.1	80078	85543	+	1338	protein_coding	epimerase family protein SDR39U1 homolog%2C chloroplastic	Epimerase
107839261	1151.49	4790.42	2064.28	539.691	682.266	557.236	2668.73	593.064	2.17005	2.09764e-05	0.000831606	LOC107839261	NC_029984.1	123521642	123523675	-	876	protein_coding	desiccation protectant protein Lea14 homolog	-
107878277	629.123	475.112	817.777	289.553	191.732	251.844	640.671	244.376	1.39034	2.11454e-05	0.000836935	LOC107878277	NC_029983.1	190285187	190286164	+	978	protein_coding	uncharacterized LOC107878277	-
107850733	39.8539	23.1198	17.634	76.5573	125.331	100.403	26.8693	100.764	-1.92215	2.12379e-05	0.000839227	LOC107850733	NC_029977.1	296584009	296587290	-	1080	protein_coding	uncharacterized LOC107850733	-
107843659	76.8612	877.397	122.336	40.9316	28.2203	30.1209	358.865	33.0909	3.4389	2.17609e-05	0.000858493	LOC107843659	NC_029986.1	193359247	193360875	-	1629	protein_coding	anthocyanidin 3-O-glucosyltransferase-like	UDPGT
107842408	21017.3	8676.86	12948.9	5203.62	4479.55	4607.66	14214.3	4763.61	1.57717	2.19382e-05	0.000864078	LOC107842408	NC_029977.1	206840978	206844345	+	2048	protein_coding	inactive beta-amylase 9	-
107860329	466.861	383.789	411.093	227.398	209.992	182.399	420.581	206.596	1.02429	2.19875e-05	0.000864589	LOC107860329	NC_029978.1	156274068	156278832	-	3160	protein_coding	probable disease resistance protein At5g66900	NB-ARC
107867278	176.496	98.2592	62.8212	363.078	434.094	358.94	112.525	385.371	-1.78167	2.20225e-05	0.000864589	LOC107867278	NC_029980.1	12625162	12628681	-	2986	protein_coding	G-type lectin S-receptor-like serine/threonine-protein kinase At4g27290	B_lectin
107853729	693.174	614.987	741.731	341.097	374.333	374.001	683.297	363.144	0.912171	2.21501e-05	0.000866953	LOC107853729	NC_029977.1	30014004	30015105	+	1102	protein_coding	uncharacterized LOC107853729	-
107855318	139.489	302.869	142.174	55.3335	51.4605	62.7518	194.844	56.5152	1.78696	2.21543e-05	0.000866953	LOC107855318	NW_015961387.1	396252	397875	+	1624	protein_coding	ethylene-responsive transcription factor ERF061-like	AP2
107870981	657.59	1905.07	1075.67	322.905	353.583	381.531	1212.78	352.673	1.78235	2.26267e-05	0.000883889	LOC107870981	NC_029981.1	173169645	173173899	-	2559	protein_coding	ABC transporter G family member 11-like	ABC2_membrane
107868344	45.5474	26.5878	18.7361	109.151	99.6009	100.403	30.2904	103.052	-1.78367	2.26601e-05	0.000883889	LOC107868344	NC_029980.1	208157587	208159984	-	1208	protein_coding	uncharacterized LOC107868344%2C transcript variant X2	-
107873884	35.5839	61.2675	35.268	111.425	175.962	136.381	44.0398	141.256	-1.6775	2.27445e-05	0.000885755	LOC107873884	NC_029982.1	13022143	13023177	-	1035	protein_coding	uncharacterized LOC107873884	IQ
107843098	318.832	119.067	251.285	45.4796	80.5107	44.3446	229.728	56.7783	2.01587	2.28717e-05	0.000889281	LOC107843098	NC_029985.1	233976766	233979733	-	2524	protein_coding	phenylalanine ammonia-lyase-like	-
107871042	49.8174	75.1394	45.1872	8.33792	16.6002	15.0604	56.7147	13.3328	2.09506	2.31403e-05	0.000898281	LOC107871042	NC_029981.1	178412764	178413804	+	1041	protein_coding	uncharacterized LOC107871042	-
107868433	29.8905	12.7159	22.0425	79.5892	66.4006	89.5259	21.5496	78.5052	-1.87858	2.35357e-05	0.000912169	LOC107868433	NC_029980.1	214589831	214595384	+	1480	protein_coding	probable purine permease 6	-
107862955	45.5474	132.939	100.293	20.4658	25.7302	15.0604	92.9266	20.4188	2.18995	2.44261e-05	0.000945164	LOC107862955	NC_029979.1	34755757	34768660	+	4500	protein_coding	serine/threonine-protein kinase TIO	Pkinase
107864477	610.619	6275.87	2204.25	532.869	242.362	374.837	3030.25	383.356	2.98266	2.49622e-05	0.00096437	LOC107864477	NC_029977.1	2391256	2398230	+	2271	protein_coding	endoglucanase 18-like%2C transcript variant X1	-
107861882	351.569	21.9638	141.072	10.6119	2.49002	20.9173	171.535	11.3397	3.91833	2.53809e-05	0.000978982	LOC107861882	NC_029979.1	4884903	4889923	-	3125	protein_coding	boron transporter 4%2C transcript variant X1	-
107840288	402.81	3200.94	1130.78	291.827	234.892	189.092	1578.18	238.604	2.72564	2.58716e-05	0.000996326	LOC107840288	NC_029984.1	145933772	145934743	-	972	protein_coding	calmodulin-like protein 1	-
107855074	2291.6	7767.1	6637	1382.58	1289	1676.73	5565.23	1449.44	1.94105	2.59986e-05	0.000999627	LOC107855074	NW_015961326.1	1141	2388	+	629	protein_coding	defensin Ec-AMP-D1-like	-
107839718	1228.36	1853.05	2122.69	732.221	589.305	799.876	1734.7	707.134	1.29498	2.63758e-05	0.00101116	LOC107839718	NC_029984.1	133909914	133911321	+	1069	protein_coding	transcription factor bHLH149	-
107843677	630.546	1144.43	1926.52	298.649	413.344	190.765	1233.83	300.919	2.03605	2.6382e-05	0.00101116	LOC107843677	NC_029986.1	195458123	195463939	-	1792	protein_coding	IQ domain-containing protein IQM3-like%2C transcript variant X2	-
107855368	157.992	134.095	305.289	67.4613	58.1005	48.5281	199.125	58.03	1.77962	2.67615e-05	0.00102408	LOC107855368	NW_015961388.1	712934	713723	+	790	protein_coding	calcium-binding allergen Ole e 8-like	-
107862406	214.927	1049.64	318.514	81.8632	117.031	85.3424	527.693	94.7456	2.47825	2.68359e-05	0.00102531	LOC107862406	NC_029979.1	16332768	16335104	-	2337	protein_coding	U-box domain-containing protein 19-like	U-box
107863183	908.101	483.204	1204.62	319.115	228.252	273.598	865.309	273.655	1.66071	2.69893e-05	0.00102955	LOC107863183	NC_029979.1	47066247	47070920	+	2339	protein_coding	S-type anion channel SLAH2-like	C4dic_mal_tran
107856727	152.299	477.424	164.217	52.3015	61.4206	65.2619	264.647	59.6613	2.1505	2.73251e-05	0.00104017	LOC107856727	NW_015961751.1	102528	105941	-	2521	protein_coding	LEAF RUST 10 DISEASE-RESISTANCE LOCUS RECEPTOR-LIKE PROTEIN KINASE-like 1.1	Pkinase
107863560	663.284	709.778	801.245	325.179	267.262	404.958	724.769	332.467	1.12476	2.73537e-05	0.00104017	LOC107863560	NC_029979.1	108906322	108913541	+	4040	protein_coding	serine/arginine repetitive matrix protein 2-like%2C transcript variant X5	-
107859987	75.4378	77.4513	89.2722	25.7718	32.3703	30.9576	80.7205	29.6999	1.44594	2.8451e-05	0.0010802	LOC107859987	NC_029978.1	149669338	149671975	+	2172	protein_coding	laccase-11-like	-
107866503	15.6569	128.315	31.9616	3.03197	5.81005	5.85683	58.6445	4.89962	3.58904	2.85209e-05	0.00108021	LOC107866503	NC_029979.1	245207947	245209325	-	1379	protein_coding	non-functional pseudokinase ZED1-like	Pkinase_Tyr
107850774	2519.34	2278.46	2813.73	1423.51	1425.95	1405.64	2537.17	1418.37	0.839038	2.85541e-05	0.00108021	LOC107850774	NC_029988.1	211003505	211007339	-	2896	protein_coding	uncharacterized LOC107850774%2C transcript variant X1	-
107860463	155.146	141.031	147.685	283.489	278.053	314.596	147.954	292.046	-0.981915	2.85914e-05	0.00108021	LOC107860463	NC_029978.1	158654884	158660429	+	2627	protein_coding	F-box/FBD/LRR-repeat protein At5g56420-like%2C transcript variant X1	F-box
107846087	18.5036	5.77995	14.3276	52.3015	56.4405	60.2417	12.8704	56.3279	-2.14687	2.86297e-05	0.00108021	LOC107846087	NC_029987.1	3640188	3647735	-	3796	protein_coding	disease resistance protein RPP13-like	NB-ARC
107855749	153.722	239.29	217.119	75.0413	90.4708	84.5058	203.377	83.3393	1.2901	2.86763e-05	0.00108029	LOC107855749	NW_015961475.1	4122	6025	+	837	protein_coding	uncharacterized LOC107855749	-
107878158	355.839	581.463	331.74	93.9911	160.191	46.018	423.014	100.067	2.07996	2.88494e-05	0.00108512	LOC107878158	NC_029983.1	169642746	169645613	-	1657	protein_coding	cytochrome b561 and DOMON domain-containing protein At5g47530-like	Cytochrom_B561
107847556	1774.92	1182.58	1594.78	735.253	752.817	599.907	1517.43	695.992	1.12416	2.89924e-05	0.00108881	LOC107847556	NC_029987.1	179044675	179056889	+	2127	protein_coding	uncharacterized LOC107847556%2C transcript variant X2	-
107870923	66.8977	110.975	176.34	27.2877	14.9401	35.9777	118.071	26.0685	2.18229	2.92294e-05	0.00109601	LOC107870923	NC_029981.1	157715751	157717983	+	1882	protein_coding	probable pectinesterase/pectinesterase inhibitor 12	-
107874652	76.8612	271.658	174.136	51.5435	32.3703	28.4475	174.218	37.4538	2.21805	2.97021e-05	0.00111202	LOC107874652	NC_029982.1	9466245	9468672	-	1772	protein_coding	ankyrin repeat-containing protein At5g02620-like	-
107864664	926.604	713.246	559.88	1727.47	1484.05	1745.34	733.243	1652.29	-1.17306	2.9806e-05	0.00111418	LOC107864664	NC_029979.1	260345855	260348057	-	2065	misc_RNA	uncharacterized LOC107864664	-
107875322	946.531	987.216	1179.27	562.431	576.855	514.565	1037.67	551.284	0.912854	3.01078e-05	0.00112373	LOC107875322	NC_029982.1	2208416	2212926	+	1340	protein_coding	protein YIF1B-like%2C transcript variant X2	-
107859183	24.197	61.2675	58.4127	8.33792	6.64006	11.7137	47.9591	8.89722	2.43832	3.03707e-05	0.0011318	LOC107859183	NC_029978.1	129642037	129648661	-	1088	protein_coding	uncharacterized LOC107859183	-
107865537	15.6569	165.307	76.0467	10.6119	1.66002	7.53022	85.6701	6.60071	3.69537	3.05239e-05	0.00113471	LOC107865537	NC_029977.1	4730156	4731458	-	818	protein_coding	protein LURP-one-related 11-like	-
107859819	415.62	516.728	542.246	232.704	251.492	257.701	491.531	247.299	0.992368	3.05425e-05	0.00113471	LOC107859819	NC_029978.1	145900352	145904200	+	1824	protein_coding	probable protein phosphatase 2C 60	PP2C
107860086	1103.1	851.965	972.075	538.933	480.574	514.565	975.713	511.357	0.931544	3.06428e-05	0.00113669	LOC107860086	NC_029978.1	151267047	151269602	+	2445	protein_coding	protein PLASTID MOVEMENT IMPAIRED 2%2C transcript variant X2	-
107851340	15.6569	55.4875	38.5744	1.51599	6.64006	3.34676	36.5729	3.83427	3.26973	3.1223e-05	0.00115645	LOC107851340	NC_029988.1	171125576	171127110	-	766	protein_coding	uncharacterized LOC107851340	-
107862809	41.2773	98.2592	30.8595	8.33792	9.13008	11.7137	56.7987	9.72722	2.54935	3.18093e-05	0.00117636	LOC107862809	NC_029979.1	28750929	28755122	+	1920	protein_coding	glutamate decarboxylase	-
107876144	381.459	233.51	288.757	119.763	103.751	140.564	301.242	121.359	1.31008	3.20329e-05	0.00118035	LOC107876144	NC_029982.1	27762762	27764411	-	1537	protein_coding	protein CDI-like%2C transcript variant X3	-
novel.5413	0	0	1.10213	25.0138	37.3503	11.7137	0.367375	24.6926	-5.82085	3.20488e-05	0.00118035	-	NC_029987.1	51522729	51524679	+	563	-	-	-
novel.2089	1.42336	142.187	29.7574	0	1.66002	0	57.7892	0.553338	6.73091	3.20633e-05	0.00118035	-	NC_029980.1	44700227	44733421	+	1509	-	-	-
107845534	1393.46	2239.15	1264.14	649.6	467.294	716.207	1632.25	611.034	1.4176	3.21773e-05	0.00118229	LOC107845534	NC_029986.1	29363417	29370690	+	2247	protein_coding	uncharacterized LOC107845534%2C transcript variant X2	-
107866774	4707.04	2213.72	3797.93	1058.16	620.846	1441.62	3572.89	1040.21	1.78014	3.22137e-05	0.00118229	LOC107866774	NC_029980.1	628545	631478	+	1679	protein_coding	glyceraldehyde-3-phosphate dehydrogenase B%2C chloroplastic	-
107854914	61.2043	386.101	225.936	35.6257	43.9904	13.387	224.414	31.001	2.85639	3.24695e-05	0.00118988	LOC107854914	NW_015961290.1	733426	736068	+	2065	protein_coding	cytokinin dehydrogenase 6-like	FAD_binding_4
107870200	666.13	929.416	797.939	404.01	399.234	404.958	797.829	402.734	0.986901	3.25198e-05	0.00118992	LOC107870200	NC_029981.1	7449949	7454464	-	985	protein_coding	prostatic spermine-binding protein-like	-
107861852	145.182	532.911	405.582	78.0732	83.0008	102.076	361.225	87.7168	2.04354	3.27961e-05	0.00119822	LOC107861852	NC_029979.1	4388788	4390354	-	1062	protein_coding	auxin-responsive protein IAA1	-
107866212	45.5474	68.2034	29.7574	6.82193	3.32003	12.5504	47.8361	7.56411	2.6627	3.36797e-05	0.00122865	LOC107866212	NC_029979.1	81425762	81426835	-	1074	protein_coding	21 kDa protein-like	-
107840944	1335.11	559.499	622.701	2661.31	2637.76	2484.13	839.103	2594.4	-1.62937	3.37337e-05	0.00122877	LOC107840944	NC_029985.1	6663028	6664568	+	1541	protein_coding	zinc finger CCCH domain-containing protein 20	zf-CCCH
107844944	7.11678	20.8078	9.91913	0	0	0	12.6146	0	6.41336	3.38578e-05	0.00123144	LOC107844944	NC_029986.1	89970136	89971241	-	1106	protein_coding	ethylene-responsive transcription factor ERF109-like	AP2
107854033	9.96349	106.351	67.2297	6.06394	5.81005	5.85683	61.1814	5.91028	3.37574	3.43828e-05	0.00124687	LOC107854033	NC_029977.1	42147709	42154969	+	977	protein_coding	probable phospholipid hydroperoxide glutathione peroxidase	GSHPx
107842876	18.5036	35.8357	52.902	117.489	151.891	116.3	35.7471	128.56	-1.8333	3.4385e-05	0.00124687	LOC107842876	NC_029985.1	203918481	203920741	-	2261	protein_coding	L-type lectin-domain containing receptor kinase S.4-like	Pkinase
107861732	486.788	812.661	719.688	323.663	268.092	269.414	673.046	287.057	1.22999	3.4691e-05	0.00125608	LOC107861732	NC_029979.1	2350339	2351460	-	1122	protein_coding	protein YLS9	-
107839755	333.065	427.716	675.603	154.631	135.291	204.989	478.795	164.97	1.53843	3.4864e-05	0.00125985	LOC107839755	NC_029984.1	134640323	134641716	-	713	protein_coding	hydrophobic protein LTI6A-like	-
107855060	14.2336	45.0836	47.3914	4.54796	5.81005	1.67338	35.5695	4.01046	3.15265	3.48989e-05	0.00125985	LOC107855060	NW_015961321.1	593329	594508	+	1038	protein_coding	endochitinase EP3-like	-
107852923	220.62	567.591	195.076	87.1692	87.1508	77.8122	327.763	84.0441	1.96392	3.52735e-05	0.00127147	LOC107852923	NW_015960681.1	1040309	1041334	-	1026	protein_coding	heme-binding-like protein At3g10130%2C chloroplastic	-
novel.5487	9.96349	2.31198	14.3276	50.7855	44.8204	59.405	8.8677	51.6703	-2.542	3.54371e-05	0.0012741	-	NC_029987.1	174636736	174640115	+	3356	-	-	-
107855029	2011.2	2099.28	2072	1282.52	1214.3	1188.94	2060.83	1228.59	0.746232	3.54536e-05	0.0012741	LOC107855029	NW_015961318.1	1322844	1328402	+	2079	protein_coding	probable protein phosphatase 2C 52	PP2C
107841774	199.27	317.897	294.268	100.813	126.161	77.8122	270.478	101.595	1.41423	3.55363e-05	0.0012741	LOC107841774	NC_029985.1	13148392	13149652	-	1059	protein_coding	protein LURP-one-related 10-like	-
107866959	216.35	636.951	565.391	143.261	131.971	128.014	472.897	134.415	1.81585	3.55569e-05	0.0012741	LOC107866959	NC_029980.1	4836120	4837210	-	1091	protein_coding	bZIP transcription factor 53-like	bZIP_1
107863000	56.9342	64.7355	54.0042	126.585	142.761	134.707	58.5579	134.684	-1.20102	3.597e-05	0.00128608	LOC107863000	NC_029979.1	36231794	36238851	-	3263	protein_coding	subtilisin-like protease SBT3.4%2C transcript variant X1	Peptidase_S8
107866399	28.4671	94.7912	117.927	18.1918	13.2801	10.0403	80.3953	13.8374	2.54031	3.59972e-05	0.00128608	LOC107866399	NC_029979.1	229120920	229121429	-	510	protein_coding	glutaredoxin-C11	-
107880036	160.839	1224.19	289.859	102.329	65.5706	63.5885	558.297	77.1627	2.85503	3.63001e-05	0.00129499	LOC107880036	NC_029984.1	151025753	151027575	+	1823	protein_coding	molybdate transporter 1-like	-
107869619	3756.23	3736.16	3093.67	6351.22	7056.72	5998.23	3528.69	6468.73	-0.874449	3.68034e-05	0.00131061	LOC107869619	NC_029977.1	18952282	18962294	-	2145	protein_coding	DEAD-box ATP-dependent RNA helicase 5	DEAD
novel.4752	66.8977	64.7355	114.621	216.028	205.012	235.11	82.0847	218.717	-1.40925	3.68462e-05	0.00131061	-	NC_029985.1	165456956	165459006	-	2051	-	-	-
107840396	19154.1	13935.5	12018.7	6286.79	7343.08	4447.85	15036.1	6025.91	1.31914	3.73354e-05	0.00132606	LOC107840396	NC_029984.1	148174993	148178490	+	1984	protein_coding	polyol transporter 5	Sugar_tr
107862959	2345.69	1396.44	1481.26	653.39	434.924	789.836	1741.13	626.05	1.47536	3.7417e-05	0.00132702	LOC107862959	NC_029979.1	34817802	34820941	-	1075	protein_coding	uncharacterized LOC107862959	-
107865709	29.8905	28.8998	63.9233	148.567	193.392	111.28	40.9045	151.079	-1.87765	3.77406e-05	0.00133653	LOC107865709	NC_029979.1	251880973	251892480	+	4543	pseudogene	-	-
107872878	937.991	1035.77	1007.34	573.042	555.275	447.629	993.7	525.316	0.919647	3.79142e-05	0.00134072	LOC107872878	NC_029982.1	36391516	36395516	+	1347	protein_coding	cinnamoyl-CoA reductase 1-like%2C transcript variant X2	-
107856146	1737.92	2354.75	2211.97	963.409	884.788	1186.43	2101.55	1011.54	1.05518	3.79892e-05	0.00134142	LOC107856146	NW_015961568.1	155660	159176	+	808	protein_coding	30S ribosomal protein S13%2C chloroplastic	-
107844894	21.3503	53.1756	29.7574	6.82193	5.81005	3.34676	34.7611	5.32625	2.7058	3.89675e-05	0.00137396	LOC107844894	NC_029986.1	89853171	89854242	+	770	protein_coding	uncharacterized LOC107844894	-
107859851	301.751	4215.9	900.437	240.284	194.222	175.705	1806.03	203.403	3.15044	4.04222e-05	0.00142318	LOC107859851	NC_029978.1	147249634	147251157	-	751	protein_coding	ubiquitin-conjugating enzyme E2 28-like%2C transcript variant X2	UQ_con
107864313	1493.1	942.132	880.599	461.618	377.653	508.708	1105.28	449.326	1.29792	4.13588e-05	0.00145404	LOC107864313	NC_029979.1	245217300	245228596	+	3848	protein_coding	probable sucrose-phosphate synthase 2	Glycos_transf_1
107855008	212.08	506.324	364.804	138.713	110.391	79.4856	361.069	109.53	1.72141	4.20331e-05	0.0014756	LOC107855008	NW_015961318.1	671396	673202	-	732	protein_coding	uncharacterized LOC107855008	-
107870093	613.466	265.878	579.718	175.096	136.121	167.338	486.354	159.519	1.60757	4.21025e-05	0.0014759	LOC107870093	NC_029981.1	2505993	2511327	-	1649	protein_coding	GATA transcription factor 8-like	GATA
107879935	52.6641	63.5795	106.906	21.2238	14.9401	23.4273	74.3833	19.8638	1.9088	4.24348e-05	0.0014854	LOC107879935	NC_029984.1	143176901	143177591	+	691	protein_coding	uncharacterized LOC107879935	-
novel.1789	125.255	801.101	274.429	83.3792	44.8204	66.9352	400.262	65.045	2.62162	4.35663e-05	0.00152126	-	NC_029979.1	59831505	59832853	-	1349	-	-	-
107859926	451.204	813.817	714.178	203.142	138.611	298.699	659.733	213.484	1.62844	4.35849e-05	0.00152126	LOC107859926	NC_029978.1	148594963	148598676	-	1520	protein_coding	mannan endo-1%2C4-beta-mannosidase 7-like	-
107879788	192.153	366.449	201.689	97.0231	87.9808	56.895	253.43	80.6329	1.6522	4.37849e-05	0.00152605	LOC107879788	NC_029984.1	128948376	128949531	-	1156	protein_coding	carboxylesterase 1-like	Abhydrolase_3
107843899	4771.09	1740.92	3549.95	1034.66	680.606	1214.87	3353.99	976.714	1.77974	4.47548e-05	0.00155761	LOC107843899	NC_029986.1	202594577	202600071	-	1742	protein_coding	mitochondrial carnitine/acylcarnitine carrier-like protein%2C transcript variant X2	Mito_carr
107851850	35.5839	83.2313	127.847	17.4338	11.6201	20.0806	82.2206	16.3782	2.33218	4.50822e-05	0.00156675	LOC107851850	NC_029988.1	229360299	229363724	+	605	protein_coding	glucan endo-1%2C3-beta-glucosidase 4-like	-
novel.3171	22.7737	5.77995	30.8595	91.7171	85.4908	115.463	19.8044	97.5571	-2.30104	4.52131e-05	0.00156905	-	NC_029982.1	156027707	156029752	+	2046	-	-	-
107862411	617.736	263.566	633.722	160.694	136.121	182.399	505.008	159.738	1.66024	4.54216e-05	0.00157335	LOC107862411	NC_029979.1	16456019	16458314	-	1830	protein_coding	flavonol 3-sulfotransferase-like%2C transcript variant X2	Sulfotransfer_1
107839702	33948.4	39529.1	24748.2	15535.1	16222.5	12081.8	32741.9	14613.1	1.16386	4.54668e-05	0.00157335	LOC107839702	NC_029984.1	133641410	133644363	-	1982	protein_coding	polyubiquitin-like	ubiquitin
107839225	6214.37	10244.4	7181.45	3713.41	3687.72	3410.35	7880.07	3603.83	1.12873	4.58356e-05	0.00158251	LOC107839225	NC_029984.1	122908703	122911484	+	1455	protein_coding	protein BPS1%2C chloroplastic-like%2C transcript variant X1	-
novel.1921	11.3868	3.46797	12.1234	41.6896	39.8404	58.5683	8.99273	46.6994	-2.38447	4.58621e-05	0.00158251	-	NC_029979.1	233490014	233506374	-	527	-	-	-
107847857	411.35	314.429	397.867	184.95	189.242	190.765	374.549	188.319	0.991364	4.59886e-05	0.00158461	LOC107847857	NC_029987.1	11012488	11038653	-	2020	protein_coding	protein IQ-DOMAIN 1%2C transcript variant X2	IQ
107862346	27.0438	60.1115	44.085	10.6119	9.96009	8.36691	43.7468	9.6463	2.18554	4.62384e-05	0.00159095	LOC107862346	NC_029979.1	14695330	14698064	-	1764	protein_coding	protein BREAKING OF ASYMMETRY IN THE STOMATAL LINEAGE-like%2C transcript variant X1	-
107853854	22.7737	38.1477	54.0042	8.33792	6.64006	7.53022	38.3085	7.50273	2.35821	4.69526e-05	0.00161324	LOC107853854	NC_029977.1	33983614	33988051	+	1995	protein_coding	probable glycosyltransferase At5g03795%2C transcript variant X1	-
107873466	83.978	60.1115	100.293	23.4978	30.7103	26.7741	81.461	26.9941	1.59514	4.71773e-05	0.00161866	LOC107873466	NC_029977.1	46412303	46414583	+	1602	protein_coding	F-box protein PP2-A13-like	F-box
107867530	781.422	539.847	1291.69	286.521	337.813	261.047	870.987	295.127	1.56161	4.81842e-05	0.00165087	LOC107867530	NC_029980.1	30323620	30326477	+	1357	protein_coding	annexin D1-like	-
107871224	523.795	512.104	633.722	308.503	225.762	276.945	556.54	270.403	1.04143	4.92294e-05	0.0016843	LOC107871224	NC_029981.1	204732872	204736704	-	1572	protein_coding	probable protein phosphatase 2C 49	PP2C
novel.5902	123.832	60.1115	68.3318	230.43	214.972	271.088	84.0917	238.83	-1.51321	5.00953e-05	0.00170966	-	NC_029988.1	42240285	42242852	+	2568	-	-	-
107845689	593.539	498.232	1235.48	184.95	189.242	301.209	775.751	225.134	1.78546	5.01117e-05	0.00170966	LOC107845689	NC_029986.1	16754516	16755765	-	838	protein_coding	uncharacterized LOC107845689	-
107860356	2001.24	1458.86	1738.05	940.669	772.737	919.523	1732.72	877.643	0.980996	5.16046e-05	0.00175567	LOC107860356	NC_029978.1	156730857	156731654	-	798	protein_coding	uncharacterized LOC107860356	-
107850321	92.5181	98.2592	109.11	208.448	216.632	192.439	99.9626	205.84	-1.03986	5.16053e-05	0.00175567	LOC107850321	NC_029988.1	228660175	228666763	-	5156	protein_coding	sufE-like protein 1%2C chloroplastic/mitochondrial%2C transcript variant X1	-
107849803	132.372	293.622	120.132	520.741	587.645	620.824	182.042	576.404	-1.66161	5.24152e-05	0.00178072	LOC107849803	NC_029988.1	216482469	216484978	-	1808	pseudogene	-	-
107862919	2845.29	731.742	1638.86	502.549	351.923	466.037	1738.63	440.17	1.98148	5.28358e-05	0.0017925	LOC107862919	NC_029979.1	33836249	33839417	-	1687	protein_coding	cinnamoyl-CoA reductase 1-like%2C transcript variant X1	-
107872675	7.11678	428.872	56.2084	6.82193	12.4501	5.02014	164.066	8.0974	4.34208	5.3645e-05	0.00181641	LOC107872675	NC_029981.1	207557513	207561084	+	792	protein_coding	protein FLOWERING LOCUS T-like	-
107861448	269.014	315.585	229.242	122.795	112.051	141.401	271.281	125.416	1.11303	5.36906e-05	0.00181641	LOC107861448	NC_029978.1	159673294	159674535	+	1242	protein_coding	uncharacterized protein At5g19025	-
107850590	1511.6	956.004	891.62	3264.67	4229.72	2105.11	1119.74	3199.84	-1.51528	5.37767e-05	0.00181678	LOC107850590	NC_029988.1	3390795	3393746	+	1443	protein_coding	uncharacterized LOC107850590	-
107859938	41.2773	82.0753	66.1275	16.6758	20.7502	15.8971	63.1601	17.7744	1.83508	5.41215e-05	0.00182588	LOC107859938	NC_029978.1	148786668	148790863	-	703	protein_coding	uncharacterized LOC107859938	-
107867612	472.554	672.786	569.799	289.553	283.033	286.985	571.713	286.524	0.997493	5.43541e-05	0.00183118	LOC107867612	NC_029980.1	38224869	38231074	-	1046	protein_coding	uncharacterized LOC107867612%2C transcript variant X3	-
107859960	166.533	45.0836	113.519	14.4019	13.2801	31.7942	108.378	19.8254	2.45023	5.48909e-05	0.0018467	LOC107859960	NC_029978.1	149105900	149111339	+	1430	protein_coding	maf-like protein DDB_G0281937%2C transcript variant X1	Maf
107840096	2.84671	120.223	176.34	1.51599	9.13008	2.51007	99.8033	4.38538	4.51504	5.50361e-05	0.00184901	LOC107840096	NC_029984.1	141302485	141306739	+	1965	protein_coding	(-)-camphene/tricyclene synthase%2C chloroplastic-like	-
107856314	17508.7	25180.9	17310	10207.9	9962.58	9356.71	19999.9	9842.39	1.02292	5.54775e-05	0.00186126	LOC107856314	NW_015961630.1	183367	185612	+	1650	protein_coding	polyubiquitin	ubiquitin
107862662	854.013	1352.51	1865.9	607.91	381.803	406.632	1357.47	465.448	1.54441	5.59261e-05	0.00187372	LOC107862662	NC_029979.1	24150142	24151698	-	555	protein_coding	stress-associated endoplasmic reticulum protein 2-like	-
107838918	118.138	146.811	126.744	251.654	278.053	256.027	130.565	261.911	-1.0024	5.65387e-05	0.00189163	LOC107838918	NC_029984.1	49380119	49383222	-	1362	lncRNA	uncharacterized LOC107838918%2C transcript variant X5	-
107843828	25.6204	20.8078	14.3276	93.2331	82.1707	49.3647	20.252	74.9229	-1.89931	5.66398e-05	0.0018924	LOC107843828	NC_029986.1	201000886	201005127	-	1530	protein_coding	uncharacterized protein DDB_G0283357	-
107864214	619.16	1365.22	880.599	367.626	341.963	361.45	954.994	357.013	1.41999	5.67907e-05	0.00189482	LOC107864214	NC_029979.1	240832042	240835673	-	649	protein_coding	50S ribosomal protein L28%2C chloroplastic	-
107850851	1000.62	706.31	728.505	1878.31	2158.85	1433.25	811.811	1823.47	-1.16814	5.7058e-05	0.00190112	LOC107850851	NC_029977.1	297726920	297733615	-	2749	protein_coding	type I inositol polyphosphate 5-phosphatase 2-like	Exo_endo_phos
107845526	25.6204	134.095	55.1063	11.3699	13.2801	5.85683	71.6072	10.1689	2.81782	5.81222e-05	0.00193392	LOC107845526	NC_029977.1	229315950	229317432	+	1483	protein_coding	zinc finger protein ZAT9-like	-
107873453	12.8102	8.09193	11.0213	50.7855	48.9704	33.4676	10.6411	44.4079	-2.07152	5.82298e-05	0.00193484	LOC107873453	NC_029982.1	183072046	183074418	-	1269	lncRNA	uncharacterized LOC107873453	-
107848469	39.8539	23.1198	16.5319	70.4933	97.9409	147.258	26.5019	105.231	-2.00277	5.84921e-05	0.0019409	LOC107848469	NC_029987.1	218147798	218150645	-	1864	protein_coding	zinc finger protein CONSTANS-LIKE 16-like	zf-B_box
107858886	2103.72	851.965	1560.61	536.659	428.284	573.97	1505.43	512.971	1.55289	5.8627e-05	0.00194271	LOC107858886	NC_029978.1	110367492	110370047	-	1172	protein_coding	uncharacterized LOC107858886	Acetyltransf_1
107859903	68.3211	509.792	91.4764	26.5297	25.7302	34.3043	223.196	28.8548	2.9526	5.90017e-05	0.00195246	LOC107859903	NC_029977.1	208600107	208605091	-	2378	protein_coding	uncharacterized LOC107859903	-
107862228	165.109	256.63	231.446	71.2513	107.071	81.159	217.728	86.4938	1.33462	5.96655e-05	0.00197173	LOC107862228	NC_029979.1	11143834	11147787	+	988	protein_coding	protein C2-DOMAIN ABA-RELATED 4-like%2C transcript variant X2	C2
107871727	5.69342	26.5878	7.71488	0	0	0	13.332	0	6.49304	6.03142e-05	0.00199045	LOC107871727	NC_029981.1	34647013	34659721	+	1749	pseudogene	-	U-box
107847087	15.6569	64.7355	39.6765	4.54796	1.66002	7.53022	40.023	4.5794	3.13379	6.12208e-05	0.00201762	LOC107847087	NC_029987.1	23995696	23998939	+	1332	lncRNA	uncharacterized LOC107847087	-
107859862	398.539	1628.79	605.067	235.736	195.882	176.542	877.466	202.72	2.11406	6.15111e-05	0.00202443	LOC107859862	NC_029978.1	147312898	147320788	-	4180	protein_coding	histidine kinase 1%2C transcript variant X2	HATPase_c
107854976	4.27007	2.31198	2.20425	24.2558	25.7302	21.754	2.92877	23.9133	-3.06493	6.2255e-05	0.00204614	LOC107854976	NW_015961313.1	23408	26619	-	834	protein_coding	uncharacterized LOC107854976	-
107876120	505.291	590.711	517.999	218.302	273.902	306.229	538	266.144	1.01621	6.25185e-05	0.00204978	LOC107876120	NC_029982.1	25289114	25297086	-	2370	protein_coding	probable plastidic glucose transporter 3%2C transcript variant X1	Sugar_tr
107869368	24.197	57.7995	16.5319	126.585	208.332	112.117	32.8428	149.011	-2.17896	6.25723e-05	0.00204978	LOC107869368	NC_029980.1	366086	367913	-	1339	protein_coding	uncharacterized LOC107869368	-
107860589	209.233	1520.13	725.199	84.1372	78.8507	207.499	818.186	123.496	2.72862	6.26196e-05	0.00204978	LOC107860589	NC_029978.1	160792795	160794558	+	558	protein_coding	uncharacterized LOC107860589	-
107842895	54.0875	62.4235	34.1659	153.873	139.441	117.137	50.2256	136.817	-1.44967	6.34535e-05	0.00207427	LOC107842895	NC_029985.1	208305870	208310138	-	3127	protein_coding	scarecrow-like protein 9%2C transcript variant X1	GRAS
107842810	1007.74	857.745	913.662	1996.55	2455.16	1511.9	926.381	1987.87	-1.10178	6.35935e-05	0.00207605	LOC107842810	NC_029985.1	189762146	189770631	-	1644	protein_coding	protein SSUH2 homolog	-
107863443	602.079	3403.24	1207.93	267.571	87.1508	399.938	1737.75	251.553	2.7884	6.38094e-05	0.00208029	LOC107863443	NC_029979.1	84642105	84643117	-	1013	protein_coding	putative glycine-rich cell wall structural protein 1	-
107851611	180.766	3407.86	716.382	159.178	157.701	142.237	1435	153.039	3.2292	6.4109e-05	0.00208709	LOC107851611	NC_029988.1	36141662	36143432	-	1227	protein_coding	purine permease 1-like	-
107856349	771.459	935.196	645.846	1538.73	1625.15	1459.19	784.167	1541.02	-0.974732	6.41903e-05	0.00208709	LOC107856349	NW_015961630.1	218104	221940	+	2169	protein_coding	pectinesterase 2.2-like	-
107859371	1207.01	1865.77	1206.83	581.38	718.787	453.486	1426.53	584.551	1.28725	6.45485e-05	0.00209592	LOC107859371	NC_029978.1	136233613	136234767	-	1155	protein_coding	VQ motif-containing protein 4-like	-
107860489	17.0803	19.6518	34.1659	3.78996	1.66002	3.34676	23.6327	2.93225	3.01088	6.47366e-05	0.00209613	LOC107860489	NC_029978.1	159129660	159132487	+	2828	protein_coding	UDP-glycosyltransferase 708D1-like	UDPGT
107839068	220.62	209.234	315.208	88.6851	89.6408	124.667	248.354	100.998	1.29986	6.48103e-05	0.00209613	LOC107839068	NC_029984.1	103452470	103460045	+	2617	protein_coding	FYVE and coiled-coil domain-containing protein 1-like	-
novel.3670	120.985	57.7995	110.213	272.877	226.592	303.719	96.3324	267.729	-1.47758	6.48146e-05	0.00209613	-	NC_029983.1	158965533	158967807	+	2275	-	-	-
107851438	120.985	227.73	239.161	56.0915	47.3104	83.6691	195.959	62.357	1.65482	6.5103e-05	0.00210265	LOC107851438	NC_029988.1	215067975	215076946	+	1732	protein_coding	protein BTR1%2C transcript variant X2	KH_1
107863442	5858.53	2627.57	3716.37	1607.7	1536.34	1485.13	4067.49	1543.06	1.39817	6.54006e-05	0.00210945	LOC107863442	NC_029979.1	84267752	84272118	-	2719	protein_coding	putative glycerol-3-phosphate transporter 1%2C transcript variant X2	MFS_1
novel.2461	8.54013	1.15599	5.51063	28.0457	40.6704	33.4676	5.06892	34.0612	-2.78339	6.57278e-05	0.00211719	-	NC_029980.1	214024200	214027753	-	3554	-	-	-
107879284	29.8905	645.043	65.0254	20.4658	12.4501	21.754	246.653	18.2233	3.75893	6.60319e-05	0.00212416	LOC107879284	NC_029984.1	127337559	127338011	+	453	protein_coding	POU domain%2C class 4%2C transcription factor 1-like	-
107870483	446.934	324.833	404.48	783.006	746.177	730.431	392.082	753.205	-0.942987	6.65291e-05	0.00213731	LOC107870483	NC_029981.1	31454693	31460021	+	2201	protein_coding	uncharacterized LOC107870483	-
107877224	41.2773	32.3677	22.0425	6.82193	2.49002	6.69352	31.8958	5.33516	2.56915	6.69666e-05	0.00214852	LOC107877224	NC_029983.1	178400062	178401916	-	1855	protein_coding	mitogen-activated protein kinase kinase kinase A-like	Pkinase
107877353	693.174	1110.91	554.369	302.439	285.523	334.676	786.15	307.546	1.35415	6.72089e-05	0.00215344	LOC107877353	NC_029983.1	208839989	208840663	+	675	protein_coding	CDGSH iron-sulfur domain-containing protein NEET-like	-
107840902	9.96349	48.5516	19.8383	3.03197	0.830008	1.67338	26.1178	1.84512	3.81478	6.74406e-05	0.00215608	LOC107840902	NC_029977.1	184221996	184222936	+	941	protein_coding	uncharacterized LOC107840902	-
107839317	553.685	488.984	462.893	885.335	902.218	865.138	501.854	884.231	-0.818134	6.74692e-05	0.00215608	LOC107839317	NC_029984.1	124649858	124657351	-	3002	protein_coding	DEAD-box ATP-dependent RNA helicase 31-like	Helicase_C
107848282	249.087	252.006	385.744	113.699	83.8308	140.564	295.612	112.698	1.39239	6.78645e-05	0.00216561	LOC107848282	NC_029977.1	269939827	269949571	-	2345	protein_coding	transmembrane 9 superfamily member 9-like	-
107878348	337.335	11.5599	127.847	12.1279	15.7701	12.5504	158.914	13.4828	3.55774	6.79623e-05	0.00216561	LOC107878348	NC_029983.1	198242768	198245552	+	2785	pseudogene	-	-
107874544	149.452	284.374	201.689	78.8312	90.4708	71.1187	211.838	80.1403	1.40435	6.80356e-05	0.00216561	LOC107874544	NC_029977.1	57174852	57176483	+	1226	protein_coding	protein NDR1-like	-
107848103	4967.51	645.043	5407.03	497.243	409.194	809.08	3673.19	571.839	2.68335	6.8725e-05	0.00218468	LOC107848103	NC_029987.1	197808765	197811908	+	1511	protein_coding	expansin-A1-like	-
107865008	8.54013	396.505	45.1872	9.09591	9.96009	1.67338	150.077	6.90979	4.43969	7.08138e-05	0.00224813	LOC107865008	NC_029979.1	36543209	36543511	-	303	protein_coding	uncharacterized LOC107865008	-
107843767	99.6349	248.538	168.625	47.7535	62.2506	28.4475	172.266	46.1505	1.90184	7.15003e-05	0.00226695	LOC107843767	NC_029986.1	199581767	199586340	-	1375	protein_coding	3-oxoacyl-[acyl-carrier-protein] reductase FabG-like	adh_short
107845315	3463.02	5746.43	3802.33	2101.91	1991.19	1634.06	4337.26	1909.05	1.18398	7.17296e-05	0.00227125	LOC107845315	NC_029986.1	338462	342126	-	1486	protein_coding	polyubiquitin	ubiquitin
107878724	550.839	275.126	346.068	1006.61	919.648	978.928	390.677	968.397	-1.31142	7.28148e-05	0.0023026	LOC107878724	NC_029983.1	217384417	217389869	-	3014	protein_coding	G-type lectin S-receptor-like serine/threonine-protein kinase At4g27290%2C transcript variant X2	B_lectin
novel.1100	12.8102	6.93594	17.634	47.7535	43.1604	86.1791	12.4601	59.031	-2.24112	7.40697e-05	0.00233729	-	NC_029978.1	116299516	116302154	-	692	-	-	-
107862845	4153.35	6704.74	6130.02	2642.36	2890.09	2278.31	5662.71	2603.59	1.1211	7.41046e-05	0.00233729	LOC107862845	NC_029979.1	30315074	30318674	-	1043	protein_coding	calmodulin	-
107853473	64.051	98.2592	160.91	32.5937	18.2602	33.4676	107.74	28.1072	1.94121	7.55816e-05	0.00238077	LOC107853473	NW_015960855.1	1516625	1528495	-	2024	protein_coding	protein HOTHEAD-like	-
107878693	807.042	149.123	649.152	106.877	108.731	122.994	535.106	112.867	2.24479	7.61822e-05	0.00239657	LOC107878693	NC_029983.1	216728562	216732168	+	3607	protein_coding	receptor-like protein kinase THESEUS 1	Pkinase_Tyr
107868079	18.5036	430.028	60.6169	5.30595	19.0902	10.877	169.716	11.7577	3.85456	7.74717e-05	0.00243398	LOC107868079	NC_029977.1	12893627	12894850	-	1224	protein_coding	ethylene-responsive transcription factor 1A-like	AP2
107843743	748.685	1025.36	1314.84	474.503	475.594	430.896	1029.63	460.331	1.16199	7.80659e-05	0.00244803	LOC107843743	NC_029986.1	199005948	199008443	+	761	protein_coding	calmodulin-7	-
novel.3860	4.27007	6.93594	3.30638	29.5617	27.3902	28.4475	4.83746	28.4665	-2.55463	7.81211e-05	0.00244803	-	NC_029983.1	59447682	59448123	-	442	-	-	-
107861639	651.897	202.298	673.399	66.7034	135.291	151.441	509.198	117.812	2.11212	7.98399e-05	0.00249866	LOC107861639	NC_029979.1	968012	971232	+	2258	protein_coding	pectinesterase 3	-
107877232	190.73	5.77995	230.344	12.1279	8.30008	11.7137	142.285	10.7139	3.73031	8.01305e-05	0.0025014	LOC107877232	NC_029983.1	181338258	181339627	+	1370	protein_coding	glycine-rich cell wall structural protein 1-like	-
107878588	54.0875	107.507	56.2084	205.416	195.052	200.806	72.601	200.425	-1.46163	8.01339e-05	0.0025014	LOC107878588	NC_029983.1	213540495	213542686	-	2192	protein_coding	uncharacterized LOC107878588	-
107856742	970.728	1310.89	936.807	1957.9	2280.03	2089.22	1072.81	2109.05	-0.974985	8.05643e-05	0.00251159	LOC107856742	NW_015961751.1	308482	315904	+	1540	protein_coding	lipid phosphate phosphatase 2-like%2C transcript variant X2	-
107862968	3471.56	3465.66	3955.53	1701.69	2232.72	1492.66	3630.92	1809.02	1.00519	8.13886e-05	0.00253403	LOC107862968	NC_029979.1	35140983	35145143	-	2363	protein_coding	NAC domain-containing protein 62-like%2C transcript variant X2	NAM
107840155	17.0803	6.93594	254.591	2.27398	4.15004	5.85683	92.8691	4.09362	4.50962	8.15422e-05	0.00253555	LOC107840155	NC_029984.1	142486969	142487936	+	968	protein_coding	basic form of pathogenesis-related protein 1-like	SCP
107842436	1668.17	2432.2	2011.38	1077.87	947.869	1081.84	2037.25	1035.86	0.976025	8.16781e-05	0.00253652	LOC107842436	NC_029985.1	65419516	65426624	-	2701	protein_coding	uncharacterized LOC107842436%2C transcript variant X2	UQ_con
107847843	509.561	488.984	497.059	294.859	266.432	217.54	498.535	259.61	0.940716	8.20881e-05	0.00254599	LOC107847843	NC_029987.1	3107843	3118119	-	1500	protein_coding	isovaleryl-CoA dehydrogenase%2C mitochondrial%2C transcript variant X1	-
107858654	327.372	324.833	672.297	134.165	134.461	181.562	441.501	150.063	1.55805	8.29849e-05	0.00257052	LOC107858654	NC_029978.1	83910232	83915242	+	2019	protein_coding	uncharacterized LOC107858654%2C transcript variant X1	-
107839672	345.875	337.549	339.455	156.146	198.372	183.235	340.96	179.251	0.928101	8.35037e-05	0.00258328	LOC107839672	NC_029984.1	133088443	133108536	+	3111	protein_coding	uncharacterized LOC107839672%2C transcript variant X1	3_5_exonuc
107878183	1505.91	952.536	1429.46	569.253	506.305	676.883	1295.97	584.147	1.14944	8.38444e-05	0.00259051	LOC107878183	NC_029983.1	173092790	173096214	-	2405	protein_coding	importin subunit alpha	V-ATPase_H
107842342	76.8612	13.8719	225.936	12.1279	2.49002	10.877	105.556	8.49829	3.63326	8.45824e-05	0.00260999	LOC107842342	NC_029985.1	33225659	33227163	+	1105	protein_coding	xyloglucan endotransglucosylase/hydrolase 2-like	-
107865545	56.9342	86.6993	85.9658	172.064	174.302	178.215	76.5331	174.86	-1.18553	8.54445e-05	0.00263323	LOC107865545	NC_029977.1	4813013	4814963	-	1742	protein_coding	heat stress transcription factor B-2b	HSF_DNA-bind
novel.3006	46.9707	457.772	61.719	26.5297	16.6002	17.5705	188.821	20.2335	3.22198	8.58453e-05	0.00264223	-	NC_029982.1	7544926	7574376	+	1286	-	-	-
107866428	24.197	123.691	71.6382	11.3699	13.2801	14.2237	73.1754	12.9579	2.50292	8.62331e-05	0.00265079	LOC107866428	NC_029979.1	233944613	233948548	-	1598	protein_coding	uncharacterized LOC107866428%2C transcript variant X1	-
107858611	79.7079	98.2592	113.519	31.8357	14.1101	37.6511	97.162	27.8656	1.80299	8.7186e-05	0.00267669	LOC107858611	NC_029978.1	75290269	75293353	+	1890	protein_coding	serine/threonine-protein kinase CDL1-like	Pkinase
107870174	815.583	531.756	761.569	309.261	179.282	326.309	702.969	271.617	1.37141	8.7576e-05	0.00268526	LOC107870174	NC_029981.1	5989798	5994623	-	1365	protein_coding	uncharacterized LOC107870174	-
107842170	569.342	5548.75	2294.63	441.91	391.764	540.502	2804.24	458.058	2.61412	8.82506e-05	0.00270162	LOC107842170	NC_029985.1	213580425	213581348	+	423	lncRNA	uncharacterized LOC107842170	-
107877663	95.3648	242.758	340.557	69.7353	53.9505	52.7115	226.227	58.7991	1.94549	8.83328e-05	0.00270162	LOC107877663	NC_029983.1	11277467	11279521	-	1330	protein_coding	acidic mammalian chitinase-like	-
107858920	330.218	189.582	246.876	550.303	600.095	553.889	255.559	568.096	-1.15478	8.86658e-05	0.00270839	LOC107858920	NC_029978.1	114044822	114046277	-	1456	protein_coding	probable tRNA N6-adenosine threonylcarbamoyltransferase	Peptidase_M22
107867130	945.108	968.72	880.599	1628.93	1856.73	1480.94	931.475	1655.53	-0.829809	8.89712e-05	0.00271429	LOC107867130	NC_029980.1	8300707	8309338	+	4105	protein_coding	uncharacterized LOC107867130	Metallophos
107856357	335.912	359.513	243.57	612.458	721.277	608.274	312.998	647.336	-1.04922	8.91267e-05	0.00271562	LOC107856357	NW_015961630.1	653453	660621	+	1962	protein_coding	uncharacterized LOC107856357	-
107847433	29.8905	26.5878	33.0638	109.909	66.4006	84.5058	29.8473	86.9384	-1.54278	8.94617e-05	0.0027224	LOC107847433	NC_029987.1	144014727	144034400	+	4648	lncRNA	uncharacterized LOC107847433%2C transcript variant X4	-
107855117	48.3941	69.3594	141.072	25.7718	12.4501	19.2439	86.2752	19.1552	2.17259	8.97272e-05	0.00272455	LOC107855117	NW_015961339.1	621430	622046	+	617	protein_coding	uncharacterized LOC107855117	-
107875215	580.729	692.438	494.854	1164.28	1297.3	1034.15	589.341	1165.24	-0.983549	8.98667e-05	0.00272455	LOC107875215	NC_029982.1	160740	168715	-	1262	protein_coding	E3 ubiquitin-protein ligase MIEL1	zf-CHY
107860754	81.1313	135.251	259	34.8677	29.8803	52.7115	158.461	39.1531	2.02024	8.99721e-05	0.00272455	LOC107860754	NC_029978.1	163094220	163095880	-	981	protein_coding	probable adenylate kinase 7%2C mitochondrial	ADK
107842931	146.606	171.087	214.915	70.4933	87.1508	76.9755	177.536	78.2065	1.1858	8.99824e-05	0.00272455	LOC107842931	NC_029985.1	213773470	213776841	+	1696	protein_coding	floral homeotic protein APETALA 2-like%2C transcript variant X1	AP2
107868631	613.466	529.444	1693.97	3821.8	3051.94	3513.26	945.626	3462.33	-1.87199	9.12151e-05	0.00275843	LOC107868631	NC_029980.1	11983992	11987762	+	1688	protein_coding	serine carboxypeptidase-like 13	Peptidase_S10
107873452	25.6204	34.6797	38.5744	81.1052	112.051	82.8324	32.9582	91.9962	-1.4721	9.1859e-05	0.00277389	LOC107873452	NC_029982.1	183015257	183017009	-	1062	lncRNA	uncharacterized LOC107873452	-
107862076	597.809	1154.83	836.513	354.741	389.274	342.206	863.052	362.074	1.25379	9.20205e-05	0.00277389	LOC107862076	NC_029979.1	8035189	8039593	-	1949	protein_coding	4-coumarate--CoA ligase 1	AMP-binding
107845522	187.883	213.858	130.051	429.024	462.314	340.533	177.264	410.624	-1.21314	9.20822e-05	0.00277389	LOC107845522	NC_029986.1	3529396	3533469	-	2705	protein_coding	uncharacterized LOC107845522%2C transcript variant X2	-
107839254	287.518	280.906	150.991	604.878	675.626	525.442	239.805	601.982	-1.32959	9.21844e-05	0.00277389	LOC107839254	NC_029984.1	123434590	123437252	-	1353	protein_coding	uncharacterized LOC107839254	-
novel.1195	31.3138	16.1839	36.3702	5.30595	3.32003	5.02014	27.9559	4.54871	2.61551	9.32892e-05	0.00280365	-	NC_029978.1	152445115	152451212	-	1271	-	-	-
107860596	327.372	542.159	479.425	1136.23	1035.85	851.751	449.652	1007.94	-1.16336	9.40877e-05	0.00281685	LOC107860596	NC_029978.1	160880581	160890871	+	2433	protein_coding	protein NRT1/ PTR FAMILY 5.8%2C transcript variant X2	-
107869091	2122.22	483.204	958.849	238.01	301.293	324.636	1188.09	287.979	2.04427	9.4114e-05	0.00281685	LOC107869091	NC_029977.1	16453565	16457232	+	2247	protein_coding	beta-amylase 3%2C chloroplastic	-
107874686	165.109	912.076	412.195	120.521	78.0207	109.606	496.46	102.716	2.27346	9.41382e-05	0.00281685	LOC107874686	NC_029982.1	12366670	12369009	+	1401	protein_coding	syntaxin-22-like	SNARE
107859058	76.8612	819.597	125.642	50.7855	19.0902	40.9978	340.7	36.9578	3.20437	9.41934e-05	0.00281685	LOC107859058	NC_029978.1	123659177	123660997	-	1821	protein_coding	flavin-dependent oxidoreductase FOX2-like	BBE
107853673	261.897	189.582	164.217	427.508	419.984	480.26	205.232	442.584	-1.1119	9.44151e-05	0.00282	LOC107853673	NW_015960950.1	185123	186939	-	1817	protein_coding	UDP-glycosyltransferase 71K1-like	UDPGT
107863529	163.686	102.883	201.689	367.626	390.104	378.184	156.086	378.638	-1.27832	9.50156e-05	0.00283444	LOC107863529	NC_029979.1	103316118	103323755	+	2719	protein_coding	probable LL-diaminopimelate aminotransferase%2C chloroplastic%2C transcript variant X7	-
107878087	83.978	52.0196	68.3318	181.16	141.931	165.665	68.1098	162.919	-1.2638	9.55624e-05	0.00284719	LOC107878087	NC_029983.1	159042566	159046215	+	3650	lncRNA	uncharacterized LOC107878087%2C transcript variant X4	-
107864319	46.9707	36.9917	17.634	3.78996	8.30008	2.51007	33.8655	4.8667	2.79574	9.56781e-05	0.00284719	LOC107864319	NC_029979.1	245446096	245447461	-	1267	pseudogene	-	TIR
107862310	66.8977	11.5599	91.4764	9.8539	4.98005	4.18345	56.6447	6.33913	3.15316	9.60613e-05	0.00285508	LOC107862310	NC_029979.1	12884752	12886194	+	1443	protein_coding	basic 7S globulin-like	-
107875408	28.4671	87.8553	54.0042	11.3699	13.2801	13.387	56.7755	12.679	2.16943	9.71852e-05	0.00288495	LOC107875408	NC_029982.1	3516822	3518999	+	2178	protein_coding	scarecrow-like protein 14	GRAS
107849652	35.5839	174.555	113.519	27.2877	19.0902	12.5504	107.886	19.6428	2.45792	9.73483e-05	0.00288625	LOC107849652	NC_029988.1	46841371	46844279	-	980	protein_coding	uncharacterized LOC107849652%2C transcript variant X2	-
107843617	122.409	72.8274	116.825	237.252	245.682	235.11	104.02	239.348	-1.20474	9.90681e-05	0.00293365	LOC107843617	NC_029986.1	191368805	191393098	-	5256	protein_coding	probable 3-deoxy-D-manno-octulosonic acid transferase%2C mitochondrial%2C transcript variant X7	-
107871399	1560	2516.59	1637.76	4616.18	5605.04	3505.73	1904.78	4575.65	-1.26422	9.95263e-05	0.00294362	LOC107871399	NC_029981.1	215995525	215999585	+	2041	protein_coding	uncharacterized LOC107871399	-
107874572	35.5839	618.455	99.1913	29.5617	23.2402	21.754	251.077	24.852	3.3369	0.000100016	0.0029545	LOC107874572	NC_029982.1	1861651	1864142	-	1052	protein_coding	NAC domain-containing protein 21/22-like	NAM
107839670	566.495	477.424	555.471	914.897	1147.9	927.053	533.13	996.617	-0.90281	0.000100358	0.00296099	LOC107839670	NC_029977.1	171536347	171540034	+	1228	protein_coding	uncharacterized LOC107839670	-
107872883	458.32	246.226	389.05	150.083	164.341	134.707	364.532	149.71	1.28273	0.00010049	0.00296127	LOC107872883	NC_029982.1	37288429	37290691	+	2263	protein_coding	protein HAIKU1-like	-
107848556	25.6204	93.6352	69.4339	13.6439	9.13008	15.0604	62.8965	12.6115	2.32288	0.000100681	0.00296329	LOC107848556	NC_029987.1	53181765	53185428	-	2614	protein_coding	protein SIEVE ELEMENT OCCLUSION C	-
107876006	772.882	617.299	531.225	1376.51	1585.31	1110.29	640.468	1357.37	-1.08448	0.000102541	0.0030137	LOC107876006	NC_029982.1	19741649	19748645	+	2060	protein_coding	uncharacterized LOC107876006%2C transcript variant X3	-
107874783	5.69342	12.7159	12.1234	0	0	0	10.1776	0	6.10566	0.000102642	0.0030137	LOC107874783	NC_029982.1	22580285	22581508	+	1155	pseudogene	-	Pkinase
107863929	1560	960.628	1229.97	2510.47	2915.82	2446.48	1250.2	2624.26	-1.07021	0.000103439	0.00303342	LOC107863929	NC_029979.1	223667835	223672882	-	2012	protein_coding	sugar transporter ERD6-like 7	Sugar_tr
107867233	609.196	402.285	444.157	236.494	196.712	244.314	485.212	225.84	1.10196	0.000103871	0.00304242	LOC107867233	NC_029980.1	11309070	11311483	+	1421	protein_coding	probable strigolactone esterase DAD2	-
107849638	15.6569	83.2313	58.4127	9.09591	8.30008	7.53022	52.4336	8.30873	2.66243	0.000104553	0.00305785	LOC107849638	NC_029988.1	12116568	12118336	-	1022	protein_coding	RING-H2 finger protein ATL80-like	-
107846968	15.6569	42.7716	42.9829	6.82193	4.98005	5.85683	33.8038	5.88627	2.52773	0.000104651	0.00305785	LOC107846968	NC_029987.1	186704647	186706347	+	1247	protein_coding	protein NEN4-like	Exonuc_X-T
novel.3295	31.3138	67.0474	61.719	11.3699	11.6201	17.5705	53.3601	13.5202	1.98911	0.000106464	0.00310709	-	NC_029982.1	8919637	8921664	-	2028	-	-	-
107873469	64.051	25.4318	42.9829	9.8539	9.13008	10.877	44.1552	9.95366	2.14275	0.000107299	0.00312767	LOC107873469	NC_029982.1	188821781	188825858	+	1729	protein_coding	tubulin beta-8 chain-like	Tubulin_C
107850528	317.408	201.142	200.587	518.467	497.175	563.929	239.712	526.524	-1.13815	0.000108032	0.00314526	LOC107850528	NC_029977.1	295128300	295131838	+	3539	protein_coding	uncharacterized LOC107850528	DnaJ
107847654	445.51	434.652	438.646	861.838	1114.7	716.207	439.603	897.582	-1.0299	0.000108291	0.00314901	LOC107847654	NC_029987.1	9876072	9882509	+	3298	protein_coding	transcription factor LHW-like	-
107877019	29.8905	166.463	121.234	15.1599	14.9401	25.9374	105.862	18.6791	2.50714	0.00010893	0.00316381	LOC107877019	NC_029983.1	8300784	8302143	-	554	lncRNA	uncharacterized LOC107877019	-
107854410	145.182	228.886	383.54	64.4294	95.4509	76.1388	252.536	78.673	1.68512	0.000109394	0.00317309	LOC107854410	NW_015961156.1	18611	19248	-	638	protein_coding	histone H3.2-like	Histone
107842026	1168.57	1831.09	1001.83	3155.52	4967.6	2744.35	1333.83	3622.49	-1.44132	0.000109512	0.00317309	LOC107842026	NC_029977.1	203437936	203450077	+	4923	protein_coding	ABC transporter C family member 4-like	ABC_membrane
novel.4100	75.4378	48.5516	56.2084	128.101	160.191	140.564	60.0659	142.952	-1.25733	0.000109783	0.00317715	-	NC_029984.1	92204430	92209751	+	5322	-	PF00078:Reverse transcriptase (RNA-dependent DNA polymerase)	RVT_1
107843137	725.911	791.853	622.701	1280.25	1293.15	1218.22	713.489	1263.87	-0.825138	0.000110192	0.00318254	LOC107843137	NC_029985.1	235126779	235131782	+	1786	protein_coding	ACT domain-containing protein ACR10	ACT
107859392	68.3211	67.0474	84.8637	31.8357	17.4302	25.1007	73.4107	24.7889	1.56473	0.000110232	0.00318254	LOC107859392	NC_029978.1	136704090	136706080	-	1176	protein_coding	stem-specific protein TSJT1-like	-
107840446	425.583	633.483	1366.64	261.507	191.732	243.477	808.567	232.239	1.80027	0.0001104	0.0031836	LOC107840446	NC_029977.1	179846642	179848329	+	1312	protein_coding	probable boron transporter 2%2C transcript variant X1	-
107862086	2398.35	2854.14	1432.76	5943.42	7754.76	4385.1	2228.42	6027.76	-1.43569	0.000111041	0.00319786	LOC107862086	NC_029979.1	8286510	8295673	-	3349	protein_coding	chaperone protein ClpD%2C chloroplastic	Clp_N
107843241	1439.01	1294.71	1639.96	751.171	671.476	882.709	1457.89	768.452	0.923981	0.000111159	0.00319786	LOC107843241	NC_029985.1	238106418	238112761	+	1190	protein_coding	alpha carbonic anhydrase 1%2C chloroplastic-like	-
107847898	55.5109	412.689	212.71	51.5435	32.3703	34.3043	226.97	39.406	2.52651	0.000113202	0.00325278	LOC107847898	NC_029987.1	201796162	201798483	-	1452	protein_coding	uncharacterized protein At3g61260%2C transcript variant X1	-
107875815	300.328	255.474	306.391	582.896	553.615	476.914	287.398	537.808	-0.904542	0.000113455	0.00325618	LOC107875815	NC_029982.1	12698257	12705000	+	1676	protein_coding	probable protein S-acyltransferase 7	-
novel.2730	29.8905	130.627	136.664	20.4658	19.9202	19.2439	99.0603	19.8766	2.32107	0.000113764	0.00326119	-	NC_029981.1	127612	129096	-	846	-	PF12734:Cysteine-rich TM module stress tolerance	-
107876147	82.5546	352.577	190.668	38.6576	56.4405	51.8748	208.6	48.991	2.0926	0.000114234	0.00327078	LOC107876147	NC_029982.1	27916661	27918435	+	1775	protein_coding	F-box/kelch-repeat protein At1g80440	Kelch_1
107854553	1115.91	1155.99	1470.24	494.211	365.203	696.127	1247.38	518.514	1.2667	0.000114837	0.00328418	LOC107854553	NW_015961180.1	2508568	2512414	+	2030	protein_coding	fasciclin-like arabinogalactan protein 15	-
107852449	8.54013	11.5599	20.9404	51.5435	110.391	43.5079	13.6801	68.4808	-2.30828	0.000115913	0.00331103	LOC107852449	NW_015960499.1	3844	5822	+	1979	protein_coding	zeatin O-glucosyltransferase-like	UDPGT
107850808	18.5036	2.31198	11.0213	48.5115	63.0806	57.7317	10.6123	56.4413	-2.43661	0.000116728	0.00333038	LOC107850808	NC_029988.1	10274550	10311485	+	2626	pseudogene	-	-
107847737	646.203	389.569	379.131	1077.87	1411.01	959.684	471.634	1149.52	-1.28665	0.000116896	0.00333127	LOC107847737	NC_029987.1	216478460	216485777	+	3248	protein_coding	putative late blight resistance protein homolog R1B-16	NB-ARC
107851159	458.32	871.617	705.361	291.069	311.253	261.884	678.433	288.069	1.23661	0.000119609	0.00340458	LOC107851159	NC_029988.1	41062873	41067538	+	1285	protein_coding	soluble inorganic pyrophosphatase PPA1	Pyrophosphatase
107862088	1715.14	818.441	2403.74	573.8	578.515	423.365	1645.77	525.227	1.64773	0.000120173	0.00341661	LOC107862088	NC_029979.1	8353123	8359774	+	3570	protein_coding	respiratory burst oxidase homolog protein C	Ferric_reduct
107843454	103.905	1487.76	411.093	100.055	90.4708	74.4655	667.586	88.3304	2.91819	0.000120354	0.00341774	LOC107843454	NC_029986.1	171930141	171934561	+	1949	protein_coding	protein NRT1/ PTR FAMILY 5.6-like	-
107842201	8.54013	32.3677	1.10213	122.795	199.202	76.9755	14.0033	132.991	-3.24426	0.000120815	0.00342682	LOC107842201	NC_029985.1	225564329	225566081	-	811	protein_coding	uncharacterized LOC107842201	-
107860513	367.226	228.886	245.774	616.248	638.276	557.236	280.629	603.92	-1.1082	0.00012098	0.00342749	LOC107860513	NC_029978.1	159435997	159440542	+	1121	protein_coding	A-kinase anchor protein 7-like%2C transcript variant X1	-
107854677	72.5911	426.56	475.016	63.6714	58.1005	65.2619	324.723	62.3446	2.3821	0.000122447	0.00346499	LOC107854677	NC_029977.1	55899637	55900970	-	684	protein_coding	mannose/glucose-specific lectin-like%2C transcript variant X2	-
107840779	3706.42	2434.52	1844.96	6853.01	6704.8	5665.23	2661.96	6407.68	-1.2676	0.000124142	0.00350886	LOC107840779	NC_029985.1	777283	781185	+	2838	protein_coding	EIN3-binding F-box protein 1-like	F-box
107867542	464.014	672.786	541.144	290.311	293.823	266.068	559.315	283.4	0.981539	0.000124879	0.00352557	LOC107867542	NC_029980.1	30965997	30972525	-	2104	protein_coding	uncharacterized WD repeat-containing protein C2A9.03-like	WD40
107868865	187.883	186.114	290.961	425.992	510.455	583.173	221.653	506.54	-1.19046	0.000125199	0.0035305	LOC107868865	NC_029980.1	71575186	71590973	-	1365	protein_coding	uncharacterized LOC107868865	-
107860310	492.481	426.56	533.429	855.774	825.858	893.586	484.157	858.406	-0.826148	0.000125379	0.00353146	LOC107860310	NC_029978.1	155910301	155911956	-	1248	protein_coding	cyclin-dependent kinase inhibitor 1-like	-
107846991	19.927	42.7716	35.268	5.30595	7.47007	7.53022	32.6555	6.76874	2.28164	0.000125726	0.00353713	LOC107846991	NC_029987.1	218957775	218959504	-	1730	pseudogene	-	-
novel.6419	157.992	6.93594	145.481	7.57993	6.64006	13.387	103.47	9.20235	3.49137	0.000127018	0.00356932	-	NW_015960455.1	1634	2392	+	411	-	-	-
107859409	696.021	473.956	448.565	1114.25	1168.65	1057.58	539.514	1113.49	-1.04678	0.000127379	0.0035745	LOC107859409	NC_029978.1	137083032	137085654	-	2402	protein_coding	protein RTF1 homolog	-
107856691	239.124	110.975	112.417	427.508	587.645	368.981	154.172	461.378	-1.58536	0.000127497	0.0035745	LOC107856691	NW_015961736.1	17420	25209	+	2425	protein_coding	probable polyamine transporter At1g31830%2C transcript variant X1	-
107861411	24.197	15.0279	22.0425	62.9134	51.4605	84.5058	20.4225	66.2932	-1.70448	0.000129456	0.00362521	LOC107861411	NC_029978.1	156964428	156966193	-	1643	protein_coding	probable galacturonosyltransferase-like 1	Glyco_transf_8
107876122	2677.33	2777.84	2094.04	1431.85	1296.47	1416.52	2516.4	1381.61	0.864852	0.000129669	0.003627	LOC107876122	NC_029982.1	25332403	25336562	-	839	protein_coding	protein CURVATURE THYLAKOID 1C%2C chloroplastic	-
107848403	15.6569	20.8078	6.61275	61.3974	83.0008	43.5079	14.3592	62.6354	-2.13202	0.000130006	0.00363223	LOC107848403	NC_029987.1	219299050	219299865	+	816	protein_coding	E3 ubiquitin-protein ligase RHA2A	-
107839144	102.482	205.766	114.621	347.919	445.714	331.329	140.956	374.987	-1.40944	0.000130204	0.00363357	LOC107839144	NC_029984.1	120506212	120508830	-	2052	protein_coding	cytochrome P450 704C1-like%2C transcript variant X1	p450
107859627	15.6569	260.098	49.5957	7.57993	8.30008	14.2237	108.45	10.0346	3.43718	0.000130913	0.00364914	LOC107859627	NC_029978.1	142564597	142571496	+	2004	protein_coding	homeobox protein knotted-1-like LET6%2C transcript variant X1	KNOX1
107848434	95.3648	257.786	135.561	40.1736	48.9704	56.0583	162.904	48.4008	1.75379	0.000131561	0.00365904	LOC107848434	NC_029987.1	175068145	175069629	-	1485	protein_coding	probable galacturonosyltransferase-like 9	Glyco_transf_8
107843847	172.226	612.675	182.953	68.2193	93.7909	38.4878	322.618	66.8327	2.27168	0.00013157	0.00365904	LOC107843847	NC_029986.1	201341826	201346174	+	2634	protein_coding	EGF domain-specific O-linked N-acetylglucosamine transferase	-
107854140	281.824	366.449	414.399	177.37	144.421	182.399	354.224	168.063	1.07701	0.000131974	0.00366605	LOC107854140	NW_015961094.1	12921	19387	-	879	protein_coding	uncharacterized protein At2g37660%2C chloroplastic-like	-
novel.277	41.2773	351.421	49.5957	16.6758	17.4302	19.2439	147.431	17.7833	3.05288	0.000132478	0.00367585	-	NC_029977.1	219898150	219899441	+	1292	-	-	-
107855913	39.8539	19.6518	17.634	68.2193	121.181	84.5058	25.7133	91.3021	-1.84381	0.000133395	0.00369706	LOC107855913	NW_015961490.1	1764029	1772949	+	3433	protein_coding	transcription factor HBI1-like%2C transcript variant X3	-
107862699	387.153	514.416	374.723	730.705	886.448	942.95	425.43	853.368	-1.00373	0.000133753	0.00370222	LOC107862699	NC_029979.1	24943656	24957107	+	3621	protein_coding	ribonuclease J%2C transcript variant X1	-
107871722	25.6204	24.2758	11.0213	2.27398	2.49002	0	20.3058	1.588	3.65859	0.000133887	0.00370222	LOC107871722	NC_029981.1	33953648	33954975	+	1328	pseudogene	-	-
107847796	586.422	523.664	508.08	967.957	961.149	863.465	539.389	930.857	-0.788037	0.000137084	0.00378629	LOC107847796	NC_029987.1	7667963	7672985	-	1402	protein_coding	glucan endo-1%2C3-beta-glucosidase 14	Glyco_hydro_17
107848449	38.4306	64.7355	45.1872	122.795	117.861	123.83	49.4511	121.495	-1.29126	0.000137303	0.00378803	LOC107848449	NC_029987.1	213961892	213963646	+	1755	protein_coding	uncharacterized LOC107848449	-
107859170	320.255	206.922	247.978	521.499	507.965	537.155	258.385	522.206	-1.0174	0.000138946	0.003829	LOC107859170	NC_029978.1	129213628	129215773	+	1282	protein_coding	protein SRG1-like	2OG-FeII_Oxy
107873035	350.145	353.733	392.357	136.439	92.1308	199.969	365.412	142.846	1.3555	0.000139168	0.00383075	LOC107873035	NC_029977.1	45176461	45178227	+	1767	protein_coding	UDP-glucuronate 4-epimerase 3	Epimerase
107872858	737.298	492.452	369.212	1159.73	1492.35	1227.43	532.987	1293.17	-1.28001	0.000140497	0.00386294	LOC107872858	NC_029982.1	34769824	34773890	+	1731	protein_coding	geraniol 8-hydroxylase-like	p450
107860459	102.482	110.975	109.11	194.804	216.632	210.009	107.522	207.148	-0.944565	0.000140728	0.00386492	LOC107860459	NC_029978.1	158441495	158451119	+	1831	protein_coding	ribosome biogenesis protein WDR12 homolog%2C transcript variant X2	WD40
107861308	39.8539	122.535	82.6594	12.1279	9.96009	27.6108	81.6828	16.5663	2.30747	0.000143272	0.00392698	LOC107861308	NC_029978.1	147125259	147127044	+	1379	protein_coding	protein FD	bZIP_1
107867158	525.218	469.332	478.323	285.005	273.902	291.168	490.958	283.359	0.792329	0.000143312	0.00392698	LOC107867158	NC_029980.1	8848615	8853449	-	1299	protein_coding	annexin D5-like	-
107852141	264.744	209.234	240.263	427.508	442.394	430.896	238.081	433.599	-0.866385	0.000143786	0.00393551	LOC107852141	NW_015960408.1	10553	11942	-	888	protein_coding	probable receptor-like protein kinase At5g56460%2C transcript variant X1	Pkinase_Tyr
107848323	246.24	335.237	325.127	160.694	146.911	112.953	302.202	140.186	1.10891	0.000144211	0.00394269	LOC107848323	NC_029987.1	163995815	164007669	+	1425	protein_coding	WAT1-related protein At1g70260-like	DUF6
107862290	513.831	2250.71	835.411	310.019	303.783	273.598	1199.99	295.8	2.02056	0.000144425	0.00394408	LOC107862290	NC_029979.1	12642877	12645486	+	2043	protein_coding	UDP-glucose 6-dehydrogenase 5-like%2C transcript variant X1	-
107859625	223.467	231.198	446.361	94.7491	64.7406	129.687	300.342	96.3922	1.64089	0.000146763	0.00400174	LOC107859625	NC_029978.1	142516666	142523341	+	2736	protein_coding	protein STRUBBELIG-RECEPTOR FAMILY 8	Pkinase_Tyr
107874674	24.197	21.9638	78.2509	6.06394	1.66002	7.53022	41.4706	5.08472	3.03053	0.000146867	0.00400174	LOC107874674	NC_029982.1	11618483	11619476	+	994	protein_coding	calmodulin-like protein 3	-
107848158	230.584	432.34	242.468	105.361	112.051	133.87	301.797	117.094	1.36717	0.000147388	0.00401042	LOC107848158	NC_029987.1	220114545	220120557	+	2136	protein_coding	probable ribose-5-phosphate isomerase 2	Rib_5-P_isom_A
107840103	203.54	94.7912	134.459	347.919	432.434	337.186	144.263	372.513	-1.37239	0.000147516	0.00401042	LOC107840103	NC_029984.1	141464001	141465697	-	1041	protein_coding	nicotinamidase 1-like	Isochorismatase
107853570	370.072	623.079	311.902	187.982	175.962	142.237	435.018	168.727	1.36639	0.000148454	0.0040314	LOC107853570	NW_015960903.1	110399	113414	-	746	protein_coding	E3 ubiquitin-protein ligase MARCH8	-
107854309	79.7079	71.6714	190.668	31.0777	34.8603	26.7741	114.016	30.904	1.88613	0.000148887	0.00403863	LOC107854309	NC_029977.1	45623233	45623982	-	488	protein_coding	protein LITTLE ZIPPER 1-like	-
107866396	354.415	449.68	343.863	748.139	722.107	663.496	382.653	711.247	-0.893958	0.000151232	0.00409393	LOC107866396	NC_029977.1	6924969	6927196	+	2018	protein_coding	UDP-glucuronate 4-epimerase 5	Epimerase
107867310	962.188	4191.62	2435.7	546.513	859.888	406.632	2529.84	604.344	2.06576	0.000151264	0.00409393	LOC107867310	NC_029980.1	14469685	14475516	-	1932	protein_coding	amino acid permease 6	Aa_trans
107843830	37.0072	393.037	91.4764	27.2877	21.5802	20.9173	173.84	23.2617	2.90235	0.00015221	0.00411495	LOC107843830	NC_029986.1	201028261	201034789	+	1695	protein_coding	polygalacturonase-2%2C transcript variant X3	-
107878565	1668.17	3492.25	3006.6	1083.93	1088.14	1192.28	2722.34	1121.45	1.27973	0.00015364	0.00414896	LOC107878565	NC_029983.1	212514827	212534060	-	3570	protein_coding	alpha%2Calpha-trehalose-phosphate synthase [UDP-forming] 1%2C transcript variant X7	-
107855110	82.5546	61.2675	134.459	203.142	283.033	291.168	92.7605	259.114	-1.47931	0.000154416	0.00416528	LOC107855110	NW_015961339.1	96826	116205	+	2273	protein_coding	pectinesterase-like%2C transcript variant X3	-
107862150	85.4013	78.6073	69.4339	166.758	144.421	204.153	77.8142	171.777	-1.14501	0.000155199	0.00418174	LOC107862150	NC_029979.1	9574334	9575833	-	1357	protein_coding	transcription factor DIVARICATA	Myb_DNA-binding
107845286	156.569	137.563	208.302	65.1874	49.8005	83.6691	167.478	66.219	1.33988	0.000155433	0.00418282	LOC107845286	NC_029986.1	374219	380420	+	901	protein_coding	photosynthetic NDH subunit of lumenal location 3%2C chloroplastic	-
107842673	3640.94	11384.2	6228.11	2509.71	2241.85	2056.59	7084.42	2269.38	1.6424	0.000155584	0.00418282	LOC107842673	NC_029985.1	152323742	152329717	-	1853	protein_coding	vacuolar cation/proton exchanger 3-like	Na_Ca_ex
107852888	11.3868	82.0753	63.9233	9.09591	5.81005	6.69352	52.4618	7.19983	2.8678	0.000157266	0.00422334	LOC107852888	NW_015960681.1	129931	132654	-	783	pseudogene	-	-
107869439	14.2336	49.7076	33.0638	2.27398	7.47007	3.34676	32.335	4.3636	2.90321	0.000157816	0.00423341	LOC107869439	NC_029980.1	8127679	8128914	-	1236	protein_coding	transcription factor MYB44-like	-
novel.1963	1.42336	4.62396	3.30638	27.2877	16.6002	30.1209	3.1179	24.6696	-2.95077	0.000159173	0.00426511	-	NC_029979.1	252872886	252891346	-	777	-	-	-
107854294	2603.32	3387.05	3838.7	1631.96	1867.52	1579.67	3276.36	1693.05	0.952687	0.000161237	0.00431397	LOC107854294	NW_015961130.1	1041729	1044828	-	1696	protein_coding	UDP-glycosyltransferase 86A1-like	UDPGT
107840133	44.124	34.6797	18.7361	105.361	121.181	78.6489	32.5133	101.73	-1.65715	0.000161353	0.00431397	LOC107840133	NC_029984.1	142040142	142048318	-	2498	protein_coding	fatty acid amide hydrolase-like%2C transcript variant X1	Amidase
107864551	27.0438	27.7438	16.5319	78.0732	65.5706	62.7518	23.7731	68.7985	-1.54143	0.000162288	0.00433419	LOC107864551	NC_029979.1	253816597	253819480	-	2791	protein_coding	pentatricopeptide repeat-containing protein At5g27110-like	PPR
107855550	113.868	16.1839	192.872	9.8539	10.7901	20.0806	107.641	13.5749	2.98921	0.00016475	0.00439085	LOC107855550	NW_015961400.1	96844	97686	+	843	protein_coding	auxin-responsive protein SAUR68-like	Auxin_inducible
107854174	1219.82	1673.87	1588.16	801.956	673.966	852.588	1493.95	776.17	0.945037	0.000164772	0.00439085	LOC107854174	NW_015961105.1	3819	9144	+	1792	protein_coding	protein DETOXIFICATION 42-like	MatE
107842515	74.0145	40.4597	69.4339	16.6758	14.9401	23.4273	61.3027	18.3478	1.73905	0.000165639	0.00440254	LOC107842515	NC_029985.1	95791658	95795446	-	3789	pseudogene	-	Peptidase_S8
107873549	180.766	4.62396	204.995	12.1279	7.47007	11.7137	130.128	10.4372	3.63899	0.000165707	0.00440254	LOC107873549	NC_029982.1	209970304	209972989	-	1742	protein_coding	CBL-interacting serine/threonine-protein kinase 11-like	Pkinase
107851748	31.3138	40.4597	13.2255	110.667	170.152	71.9554	28.333	117.591	-2.05737	0.000165884	0.00440254	LOC107851748	NC_029988.1	2156701	2185235	+	2933	pseudogene	-	LRR_1
107871207	93.9415	77.4513	96.9871	182.676	170.982	187.419	89.46	180.359	-1.01239	0.000165938	0.00440254	LOC107871207	NC_029977.1	33405725	33408587	-	2427	protein_coding	bZIP transcription factor 17-like	bZIP_1
107862341	12.8102	636.951	80.4552	22.7398	16.6002	12.5504	243.405	17.2968	3.81448	0.000167077	0.0044279	LOC107862341	NC_029979.1	14553977	14556348	+	1900	protein_coding	cytochrome P450 78A5-like	p450
107853493	703.138	432.34	443.055	1073.32	1414.33	1069.29	526.177	1185.65	-1.17329	0.000167513	0.00443461	LOC107853493	NW_015960864.1	223157	289270	+	16820	protein_coding	midasin	AAA_5
107878852	761.495	890.112	1144.01	1728.22	1784.52	1879.21	931.871	1797.32	-0.94694	0.000169056	0.00447057	LOC107878852	NC_029983.1	220188102	220192595	+	2362	protein_coding	probable amino acid permease 7	Aa_trans
107851706	1.42336	2.31198	68.3318	0	0	0	24.0224	0	7.34151	0.000169481	0.00447691	LOC107851706	NC_029988.1	215155185	215157781	-	1970	protein_coding	5-epi-aristolochene synthase 2-like%2C transcript variant X2	-
107855122	343.029	910.92	458.484	203.9	191.732	97.8928	570.811	164.508	1.795	0.000169968	0.00448489	LOC107855122	NW_015961339.1	67346	68922	-	705	protein_coding	protein SENESCENCE-ASSOCIATED GENE 21%2C mitochondrial-like	-
107864060	18.5036	54.3315	20.9404	3.78996	4.98005	5.85683	31.2585	4.87561	2.6891	0.000171129	0.00451063	LOC107864060	NC_029979.1	233309780	233311108	+	1069	protein_coding	ethylene-responsive transcription factor ERF071-like	AP2
107864653	2069.56	3501.49	2153.55	1093.78	1300.62	1088.53	2574.87	1160.98	1.1493	0.000171387	0.00451249	LOC107864653	NC_029979.1	259657148	259658806	-	1659	protein_coding	CBL-interacting serine/threonine-protein kinase 4	Pkinase
novel.5558	72.5911	28.8998	31.9616	169.79	154.381	112.953	44.4842	145.708	-1.72423	0.000172357	0.00453312	-	NC_029987.1	206082437	206083775	+	1339	-	-	-
107863532	895.29	968.72	1056.94	522.257	467.294	611.621	973.65	533.724	0.867703	0.000173325	0.00455363	LOC107863532	NC_029977.1	293322	296213	+	932	protein_coding	50S ribosomal protein L11%2C chloroplastic	-
107865777	9.96349	94.7912	47.3914	5.30595	8.30008	4.18345	50.7154	5.92983	3.10175	0.000174718	0.00458034	LOC107865777	NC_029979.1	260909089	260912286	+	3198	protein_coding	putative calcium-transporting ATPase 13%2C plasma membrane-type	Hydrolase
107869906	17.0803	107.507	51.7999	11.3699	9.13008	6.69352	58.7958	9.0645	2.69916	0.000174758	0.00458034	LOC107869906	NC_029980.1	214969452	214979896	-	1313	pseudogene	-	DUF6
107859067	183.613	284.374	273.327	97.7811	106.241	127.177	247.105	110.4	1.16506	0.000174909	0.00458034	LOC107859067	NC_029978.1	124637097	124639973	-	2021	protein_coding	patellin-4-like	CRAL_TRIO_N
107843395	1954.27	810.349	951.135	429.024	483.894	247.66	1238.58	386.86	1.67827	0.000175211	0.0045833	LOC107843395	NC_029986.1	164829963	164833383	-	1069	protein_coding	probable WRKY transcription factor 70	WRKY
107840295	1824.74	716.714	1222.26	447.216	500.495	435.916	1254.57	461.209	1.44328	0.000175873	0.00459104	LOC107840295	NC_029984.1	146033696	146036827	-	2206	protein_coding	ferredoxin--nitrite reductase%2C chloroplastic-like	-
107878376	148.029	157.215	249.08	48.5115	65.5706	87.8525	184.775	67.3115	1.46001	0.000175886	0.00459104	LOC107878376	NC_029983.1	199731288	199733168	-	1881	protein_coding	GATA zinc finger domain-containing protein 14-like	-
107875424	278.978	1743.23	438.646	153.873	175.962	143.074	820.286	157.636	2.37984	0.000178598	0.00465681	LOC107875424	NC_029982.1	3779921	3784357	-	1181	protein_coding	tetraspanin-3-like	Tetraspannin
107872379	2.84671	180.334	13.2255	3.03197	1.66002	3.34676	65.4689	2.67958	4.6112	0.000178848	0.00465831	LOC107872379	NC_029981.1	35116090	35116616	-	527	protein_coding	uncharacterized LOC107872379	-
107849935	0	144.499	163.115	4.54796	4.15004	5.02014	102.538	4.57271	4.48852	0.000179823	0.00467728	LOC107849935	NC_029977.1	288233199	288235687	-	1804	protein_coding	methanol O-anthraniloyltransferase-like	-
107878435	41.2773	38.1477	87.0679	10.6119	9.96009	18.4072	55.4976	12.9931	2.10123	0.000179962	0.00467728	LOC107878435	NC_029983.1	205313152	205313703	-	552	protein_coding	protein LIGHT-DEPENDENT SHORT HYPOCOTYLS 10-like	-
107840465	52.6641	64.7355	45.1872	15.1599	14.1101	22.5906	54.1956	17.2869	1.65038	0.000180215	0.00467882	LOC107840465	NC_029984.1	149714150	149722424	-	1463	protein_coding	uncharacterized LOC107840465%2C transcript variant X1	-
107854190	11.3868	35.8357	34.1659	3.78996	3.32003	5.02014	27.1295	4.04338	2.75715	0.00018148	0.00470662	LOC107854190	NC_029977.1	44815719	44817964	-	1572	protein_coding	uncharacterized LOC107854190	-
107860225	2130.76	277.438	2210.86	248.622	125.331	372.327	1539.69	248.76	2.62976	0.000183705	0.00475924	LOC107860225	NC_029978.1	154126749	154128661	+	1006	protein_coding	lysine-rich arabinogalactan protein 18-like	-
107840075	821.276	467.02	460.689	1398.5	1337.97	1265.91	582.995	1334.13	-1.1957	0.000184247	0.00476801	LOC107840075	NC_029984.1	140840073	140842160	+	1571	protein_coding	protein DMR6-LIKE OXYGENASE 2-like	2OG-FeII_Oxy
107862689	34.1605	590.711	70.5361	31.8357	10.7901	20.9173	231.803	21.181	3.4514	0.000184437	0.00476801	LOC107862689	NC_029979.1	24610708	24612216	-	1509	protein_coding	uncharacterized LOC107862689	-
107840921	38.4306	31.2117	52.902	10.6119	12.4501	4.18345	40.8481	9.08182	2.1679	0.000185226	0.0047833	LOC107840921	NC_029985.1	5972814	5974429	-	1616	protein_coding	putative nuclease HARBI1	-
novel.6138	172.226	153.747	142.174	304.713	275.563	287.822	156.049	289.366	-0.893333	0.000185516	0.00478569	-	NC_029988.1	20442999	20444927	-	1929	-	-	-
107872246	34.1605	325.989	93.6807	29.5617	13.2801	20.0806	151.277	20.9741	2.85039	0.000185868	0.00478965	LOC107872246	NC_029977.1	42839153	42841853	+	2700	protein_coding	subtilisin-like protease SBT1.5	Peptidase_S8
107848392	244.817	719.026	806.756	166	169.322	196.622	590.2	177.315	1.73591	0.000186158	0.00479203	LOC107848392	NC_029987.1	3549507	3553344	-	1301	protein_coding	heavy metal-associated isoprenylated plant protein 3-like	HMA
107860916	149.452	187.27	36.3702	525.289	543.655	457.67	124.364	508.871	-2.03438	0.000186633	0.00479793	LOC107860916	NC_029978.1	60307518	60308606	-	1089	pseudogene	-	-
107873591	660.437	572.215	645.846	1072.56	1012.61	1055.9	626.166	1047.02	-0.742045	0.000186783	0.00479793	LOC107873591	NC_029982.1	212985140	212991695	-	4781	protein_coding	putative late blight resistance protein homolog R1A-3	NB-ARC
107862628	710.254	750.238	471.71	1284.04	1293.15	1325.32	644.067	1300.84	-1.01473	0.00018861	0.00483972	LOC107862628	NC_029979.1	22656681	22658707	-	1671	protein_coding	uncharacterized LOC107862628	-
107860569	1655.36	3940.77	1526.44	643.536	936.249	374.001	2374.19	651.262	1.86619	0.000189118	0.00484621	LOC107860569	NC_029978.1	160492343	160494306	+	1964	protein_coding	AAA-ATPase At3g28600-like	AAA
novel.741	71.1678	262.41	150.991	36.3836	36.5203	52.7115	161.523	41.8718	1.95058	0.000189355	0.00484621	-	NC_029978.1	16140618	16170853	+	8284	-	-	-
107846894	12.8102	80.9193	52.902	4.54796	1.66002	10.0403	48.8772	5.41609	3.18072	0.000189566	0.00484621	LOC107846894	NC_029987.1	210594719	210596062	-	773	protein_coding	zinc finger Ran-binding domain-containing protein 2-like%2C transcript variant X2	zf-RanBP
107859035	172.226	157.215	294.268	84.1372	80.5107	83.6691	207.903	82.7723	1.33037	0.000189663	0.00484621	LOC107859035	NC_029978.1	123196809	123203349	-	3637	protein_coding	E3 ubiquitin-protein ligase SINAT5-like%2C transcript variant X7	-
107855849	19.927	77.4513	68.3318	11.3699	12.4501	10.0403	55.2367	11.2868	2.29716	0.000191438	0.00488591	LOC107855849	NW_015961487.1	2553972	2555381	-	782	protein_coding	uncharacterized LOC107855849	-
107848395	27.0438	65.8914	57.3105	9.09591	16.6002	10.0403	50.0819	11.9121	2.08061	0.00019162	0.00488591	LOC107848395	NC_029987.1	147402360	147403833	-	1474	protein_coding	F-box/kelch-repeat protein At1g23390	F-box
107866819	82.5546	77.4513	92.5786	166	160.191	180.725	84.1948	168.972	-1.00382	0.000193167	0.00492018	LOC107866819	NC_029980.1	1309597	1312135	-	1680	protein_coding	F-box protein SKIP23-like	DUF295
novel.6866	78.2845	94.7912	125.642	36.3836	45.6504	35.141	99.5727	39.0584	1.3544	0.000193464	0.00492257	-	NW_015961206.1	257131	260545	+	1947	-	-	-
107843508	37.0072	218.482	103.6	28.8037	16.6002	22.5906	119.696	22.6648	2.40199	0.000193858	0.00492741	LOC107843508	NC_029986.1	178697776	178702210	-	1268	protein_coding	GDSL esterase/lipase At4g01130-like	Lipase_GDSL
107867740	2989.05	1969.81	2814.83	1284.04	1437.57	1184.75	2591.23	1302.12	0.992641	0.000195669	0.00496822	LOC107867740	NC_029980.1	58220846	58224707	-	2597	protein_coding	scarecrow-like protein 1%2C transcript variant X1	GRAS
107863793	48.3941	58.9555	79.3531	22.7398	22.4102	20.0806	62.2342	21.7435	1.52154	0.000196402	0.00498162	LOC107863793	NC_029979.1	196076771	196083297	+	2413	protein_coding	serine/threonine-protein kinase Nek2-like%2C transcript variant X1	Pkinase
107849693	9.96349	46.2396	3.30638	0	0.830008	0	19.8365	0.276669	6.10172	0.000199406	0.00505251	LOC107849693	NC_029988.1	13157599	13160147	+	1330	protein_coding	high mobility group B protein 9	ARID
107839143	4456.53	3669.11	8680.34	1704.73	2499.15	1733.62	5601.99	1979.17	1.50113	0.000200694	0.00507985	LOC107839143	NC_029984.1	120012906	120019265	-	2535	protein_coding	peroxisomal fatty acid beta-oxidation multifunctional protein AIM1-like	3HCDH_N
107855537	112.445	36.9917	128.949	20.4658	15.7701	28.4475	92.7952	21.5611	2.10531	0.000201362	0.00509144	LOC107855537	NW_015961400.1	120639	121586	+	948	protein_coding	auxin-responsive protein SAUR68-like	Auxin_inducible
novel.1803	46.9707	54.3315	28.6553	125.827	112.881	100.403	43.3192	113.037	-1.38824	0.000204132	0.00515393	-	NC_029979.1	69606281	69608730	-	2112	-	PF00665:Integrase core domain	rve
107842803	774.305	928.26	1018.36	495.727	476.424	538.829	906.977	503.66	0.849298	0.000204259	0.00515393	LOC107842803	NC_029985.1	187424124	187425836	-	1713	protein_coding	L-type lectin-domain containing receptor kinase VIII.2-like	-
107850036	28.4671	12.7159	18.7361	3.78996	1.66002	0.836691	19.973	2.09556	3.22517	0.000204867	0.00516007	LOC107850036	NC_029988.1	202678149	202678986	-	838	pseudogene	-	-
107862398	156.569	379.165	449.667	109.151	78.8507	119.647	328.467	102.549	1.68092	0.000204929	0.00516007	LOC107862398	NC_029979.1	15963688	15965974	+	2069	protein_coding	polygalacturonase 1 beta-like protein 3	-
107878569	197.846	115.599	188.464	59.8814	50.6305	81.159	167.303	63.8903	1.38804	0.000205312	0.00516178	LOC107878569	NC_029983.1	212573646	212575253	-	1608	protein_coding	probable receptor-like protein kinase At1g33260	Pkinase
107860315	108.175	120.223	89.2722	50.7855	44.8204	44.3446	105.89	46.6502	1.18076	0.000205423	0.00516178	LOC107860315	NC_029978.1	155986771	155990751	+	1807	protein_coding	uncharacterized LOC107860315	Sulfotransfer_1
107854470	207.81	55.4875	702.054	41.6896	46.4804	52.7115	321.784	46.9605	2.77739	0.000207504	0.00520868	LOC107854470	NW_015961176.1	1042	3162	-	1124	protein_coding	thaumatin-like protein	Thaumatin
107858775	1040.47	235.822	540.042	147.809	119.521	193.276	605.445	153.535	1.97872	0.000208448	0.00522696	LOC107858775	NC_029978.1	101629928	101632994	+	1472	protein_coding	myb-related protein 306-like	Myb_DNA-binding
novel.1729	7.11678	11.5599	24.2468	61.3974	63.9106	48.5281	14.3078	57.9453	-1.99539	0.00020876	0.00522936	-	NC_029979.1	33792972	33793900	-	929	-	-	-
107863209	1715.14	3120.02	1604.7	780.732	1034.19	767.245	2146.62	860.722	1.31858	0.000209593	0.0052448	LOC107863209	NC_029979.1	49628449	49629945	+	945	protein_coding	heavy metal-associated isoprenylated plant protein 3-like	HMA
107876113	510.985	98.2592	1155.03	80.3472	120.351	25.1007	588.091	75.2663	2.96598	0.00021033	0.00525782	LOC107876113	NC_029982.1	25122960	25127240	-	2950	protein_coding	probable linoleate 9S-lipoxygenase 5	Lipoxygenase
107862810	4.27007	75.1394	11.0213	1.51599	1.66002	0.836691	30.1436	1.33756	4.49486	0.000210974	0.00526847	LOC107862810	NC_029979.1	28755203	28756304	-	1102	protein_coding	agamous-like MADS-box protein AGL62	SRF-TF
107842865	3968.31	6566.02	3211.59	1879.82	2132.29	1678.4	4581.98	1896.84	1.2724	0.000211297	0.00527112	LOC107842865	NC_029985.1	202382965	202384370	+	903	protein_coding	probable glutathione S-transferase	GST_C
107845595	11638.8	39562.6	15954.4	7053.88	5539.47	7115.22	22385.3	6569.52	1.7687	0.000213853	0.00532938	LOC107845595	NC_029986.1	2288998	2294416	-	1588	protein_coding	peroxisomal (S)-2-hydroxy-acid oxidase-like%2C transcript variant X2	FMN_dh
107851001	959.341	1423.02	1356.72	648.842	681.436	575.643	1246.36	635.307	0.972677	0.000214917	0.00534766	LOC107851001	NC_029988.1	11915699	11920692	+	1727	protein_coding	UDP-galactose transporter 2	-
107863930	704.561	627.703	522.408	322.147	363.543	297.025	618.224	327.572	0.915528	0.000215028	0.00534766	LOC107863930	NC_029979.1	223700076	223703186	-	3111	protein_coding	probable LRR receptor-like serine/threonine-protein kinase RKF3	Pkinase
107861297	27.0438	4.62396	33.0638	1.51599	0	1.67338	21.5772	1.06312	4.33255	0.000215384	0.00535102	LOC107861297	NC_029978.1	145687935	145689303	+	1369	protein_coding	uncharacterized LOC107861297	-
107879518	243.394	154.903	209.404	98.539	87.9808	93.7093	202.567	93.4097	1.11454	0.00021767	0.00540227	LOC107879518	NC_029977.1	154195314	154199281	-	1812	lncRNA	uncharacterized LOC107879518%2C transcript variant X2	-
107866867	427.007	1816.06	812.267	266.813	239.872	308.739	1018.44	271.808	1.90608	0.000218895	0.00542712	LOC107866867	NC_029980.1	2187666	2192289	+	3428	protein_coding	receptor protein kinase CLAVATA1	LRR_1
107878552	166.533	234.666	144.378	418.412	499.665	333.003	181.859	417.026	-1.19697	0.000219284	0.00543121	LOC107878552	NC_029977.1	135581663	135584507	+	2845	protein_coding	probable E3 ubiquitin-protein ligase ARI7	IBR
107871043	368.649	527.132	1183.68	2476.36	1838.47	2488.32	693.155	2267.72	-1.70927	0.000220534	0.00545659	LOC107871043	NC_029981.1	178522876	178527531	+	1730	protein_coding	serine carboxypeptidase-like 13%2C transcript variant X1	Peptidase_S10
107845057	86.8247	93.6352	113.519	40.1736	20.7502	42.6712	97.9929	34.5317	1.50528	0.000222553	0.00550093	LOC107845057	NC_029977.1	227865610	227868674	+	3065	protein_coding	uncharacterized LOC107845057	-
107872930	750.108	1677.34	1580.45	502.549	571.045	490.301	1335.97	521.298	1.35819	0.000224172	0.00553528	LOC107872930	NC_029982.1	41044078	41048377	+	1041	protein_coding	GTP-binding protein YPTM2	Ras
107866862	361.532	327.145	450.769	200.11	199.202	200.806	379.816	200.039	0.925662	0.000224677	0.0055421	LOC107866862	NC_029980.1	2049333	2054538	-	1446	protein_coding	prostaglandin E synthase 2	-
107860278	130.949	314.429	260.102	60.6394	104.581	51.8748	235.16	72.3651	1.70237	0.000225778	0.0055636	LOC107860278	NC_029978.1	155028943	155033317	-	1938	protein_coding	caffeoyl-CoA O-methyltransferase%2C transcript variant X2	-
107877444	21.3503	104.039	95.8849	11.3699	14.9401	16.7338	73.7581	14.3479	2.36846	0.00022752	0.00560083	LOC107877444	NC_029983.1	221070067	221072084	+	1236	protein_coding	uncharacterized LOC107877444	CCT
107858877	325.948	720.182	543.348	210.722	232.402	188.255	529.826	210.46	1.33296	0.000227978	0.00560362	LOC107858877	NC_029978.1	109815301	109819765	+	2601	protein_coding	probable L-type lectin-domain containing receptor kinase S.5	Pkinase_Tyr
107848546	101.058	228.886	282.144	77.3153	58.9305	59.405	204.029	65.2169	1.64735	0.000228096	0.00560362	LOC107848546	NC_029987.1	109903067	109906393	+	1624	protein_coding	protein kinase 2B%2C chloroplastic-like	Pkinase
107843713	286.094	206.922	251.285	125.069	132.801	98.7295	248.1	118.866	1.05994	0.000228885	0.0056173	LOC107843713	NC_029986.1	197016417	197018638	+	1456	protein_coding	syntaxin-121-like	SNARE
107849567	310.291	606.895	416.604	197.836	181.772	193.276	444.597	190.961	1.2202	0.000229998	0.00563892	LOC107849567	NC_029988.1	36342110	36344078	-	1300	protein_coding	purine permease 3-like	-
107861632	243.394	356.045	158.706	73.5253	115.371	77.8122	252.715	88.9029	1.50756	0.000230596	0.00564786	LOC107861632	NC_029979.1	893464	894971	+	1508	protein_coding	RING-H2 finger protein ATL60-like	-
107866841	25.6204	28.8998	19.8383	62.9134	61.4206	79.4856	24.7861	67.9399	-1.4572	0.000230948	0.00565076	LOC107866841	NC_029980.1	1739908	1741962	-	2055	protein_coding	pentatricopeptide repeat-containing protein At1g20300%2C mitochondrial	PPR
107844967	24.197	26.5878	59.5148	8.33792	3.32003	8.36691	36.7665	6.67495	2.46412	0.000232153	0.00567044	LOC107844967	NC_029986.1	168527192	168530247	-	1091	protein_coding	transcription factor TGA6-like	-
107863487	173.649	106.351	112.417	288.037	261.452	312.922	130.806	287.471	-1.14077	0.000232221	0.00567044	LOC107863487	NC_029979.1	94899597	94908231	+	4829	protein_coding	uncharacterized LOC107863487%2C transcript variant X9	-
107868013	1271.06	1242.69	810.062	555.609	505.475	573.133	1107.94	544.739	1.0238	0.000232831	0.00567962	LOC107868013	NC_029980.1	147583964	147630298	-	3149	protein_coding	probable amino-acid acetyltransferase NAGS1%2C chloroplastic%2C transcript variant X1	AA_kinase
107847932	7.11678	5.77995	2.20425	18.9498	49.8005	29.2842	5.03366	32.6781	-2.72381	0.000234401	0.00571217	LOC107847932	NC_029987.1	196456293	196466204	-	4714	protein_coding	carotenoid 9%2C10(9'%2C10')-cleavage dioxygenase-like%2C transcript variant X3	RPE65
107845634	1803.39	1695.84	1589.27	2731.05	2799.62	2640.6	1696.16	2723.75	-0.683551	0.000236289	0.0057524	LOC107845634	NC_029986.1	9649089	9650734	+	1646	protein_coding	anthocyanin 5-aromatic acyltransferase-like	-
107842875	28.4671	28.8998	20.9404	74.2833	87.9808	56.895	26.1024	73.053	-1.48963	0.000238806	0.00580782	LOC107842875	NC_029985.1	203826422	203828664	-	2243	protein_coding	L-type lectin-domain containing receptor kinase IV.1-like	Pkinase
107867702	58.3576	36.9917	41.8808	109.909	98.7709	116.3	45.7433	108.327	-1.25244	0.000240628	0.00584628	LOC107867702	NC_029980.1	51724988	51726971	+	1984	protein_coding	pentatricopeptide repeat-containing protein At3g21470-like	PPR
107845295	256.204	3118.86	641.437	219.06	150.231	217.54	1338.83	195.61	2.77504	0.000240981	0.00584899	LOC107845295	NC_029986.1	3670071	3673582	+	1095	protein_coding	putative 4-hydroxy-4-methyl-2-oxoglutarate aldolase 3%2C transcript variant X1	-
107868316	550.839	569.903	407.787	890.641	1064.9	945.46	509.509	967	-0.925004	0.000241741	0.00585634	LOC107868316	NC_029980.1	206742561	206750223	-	1270	protein_coding	peroxisomal membrane protein PMP22-like	Mpv17_PMP22
107866851	28.4671	250.85	69.4339	20.4658	18.2602	13.387	116.25	17.371	2.74346	0.000241768	0.00585634	LOC107866851	NC_029980.1	1824932	1825799	-	868	protein_coding	E3 ubiquitin-protein ligase ATL23	-
107872811	518.101	438.12	676.705	273.635	238.212	290.332	544.309	267.393	1.02584	0.000242118	0.00585897	LOC107872811	NC_029982.1	31531174	31536247	+	1192	protein_coding	N-alpha-acetyltransferase 50-like	Acetyltransf_1
107858979	175.073	158.371	252.387	88.6851	71.3806	94.546	195.277	84.8706	1.20341	0.000245125	0.00592582	LOC107858979	NC_029978.1	119587280	119597409	+	1907	protein_coding	transmembrane protein 56-B	LAG1
novel.1389	32.7372	331.769	116.825	26.5297	29.8803	17.5705	160.444	24.6602	2.70302	0.000245645	0.00593247	-	NC_029979.1	52898695	52901113	+	334	-	-	-
107878912	562.225	425.404	326.229	935.363	935.419	857.608	437.953	909.463	-1.05588	0.000247425	0.0059695	LOC107878912	NC_029983.1	221350045	221356272	+	1782	protein_coding	probable protein phosphatase 2C 6	PP2C
107858802	51.2408	23.1198	30.8595	101.571	87.1508	106.26	35.0734	98.3272	-1.5004	0.000248891	0.0059989	LOC107858802	NC_029978.1	104050176	104053856	+	1964	lncRNA	uncharacterized LOC107858802%2C transcript variant X2	-
novel.7106	49.8174	116.755	433.135	33.3517	34.0303	31.7942	199.903	33.0587	2.59794	0.000250643	0.00603511	-	NW_015961614.1	55406	57366	-	564	-	PF13472:GDSL-like Lipase/Acylhydrolase family	-
107848237	417.043	257.786	242.468	120.521	116.201	152.278	305.766	129.667	1.2358	0.000251771	0.00605627	LOC107848237	NC_029987.1	214539182	214547014	-	2000	protein_coding	prolycopene isomerase%2C chloroplastic	Amino_oxidase
107866852	2742.81	3033.32	2250.54	4655.59	4898.7	4521.48	2675.55	4691.92	-0.810418	0.000254037	0.00610285	LOC107866852	NC_029980.1	1835207	1841485	+	1219	protein_coding	replication factor C subunit 1%2C transcript variant X1	-
107843940	58.3576	153.747	57.3105	25.0138	26.5602	16.7338	89.8049	22.7693	1.98081	0.00025428	0.00610285	LOC107843940	NC_029986.1	203293694	203308207	-	2312	protein_coding	uncharacterized LOC107843940%2C transcript variant X2	Myb_DNA-binding
107842978	83.978	872.773	505.876	100.813	69.7206	86.1791	487.542	85.5709	2.51078	0.000254464	0.00610285	LOC107842978	NC_029977.1	217081980	217082952	-	973	protein_coding	uncharacterized LOC107842978	-
107852478	45.5474	423.092	174.136	31.0777	21.5802	50.2014	214.259	34.2864	2.64521	0.000256009	0.00613383	LOC107852478	NC_029977.1	7418399	7420114	+	846	protein_coding	uncharacterized LOC107852478	-
107872768	3999.63	3483	2022.4	7402.56	7947.32	6460.09	3168.34	7269.99	-1.1984	0.000256645	0.00614299	LOC107872768	NC_029982.1	29740661	29745722	-	3945	protein_coding	receptor-like protein kinase HAIKU2	Pkinase
107839586	5.69342	18.4958	17.634	67.4613	50.6305	46.018	13.9411	54.7033	-1.94984	0.000259053	0.00619451	LOC107839586	NC_029984.1	131490842	131494891	+	1699	protein_coding	protein indeterminate-domain 2-like	-
107842858	95.3648	102.883	365.906	43.2056	34.8603	50.2014	188.051	42.7558	2.13888	0.000259589	0.0062012	LOC107842858	NC_029985.1	200360677	200362444	-	832	protein_coding	uncharacterized protein C167.05-like	Usp
107869268	195	27.7438	45.1872	462.376	459.824	469.383	89.3102	463.861	-2.38271	0.00026228	0.00625932	LOC107869268	NC_029980.1	211716089	211721053	-	1504	protein_coding	uncharacterized LOC107869268	-
107843086	176.496	2040.32	520.203	170.548	126.991	135.544	912.341	144.361	2.66004	0.000265089	0.00632013	LOC107843086	NC_029985.1	233168699	233206908	-	1293	protein_coding	flavonol synthase/flavanone 3-hydroxylase-like	2OG-FeII_Oxy
107875046	19.927	335.237	56.2084	17.4338	12.4501	15.0604	137.124	14.9815	3.19486	0.000268844	0.00640335	LOC107875046	NC_029982.1	160569945	160574452	-	1985	pseudogene	-	-
107870529	190.73	756.018	314.106	110.667	113.711	120.483	420.284	114.954	1.87118	0.000270318	0.00643153	LOC107870529	NC_029981.1	33027814	33034106	+	1259	protein_coding	purple acid phosphatase 3-like	Metallophos
107866754	418.466	469.332	307.493	999.792	1805.27	677.719	398.431	1160.93	-1.54309	0.000270694	0.00643153	LOC107866754	NC_029980.1	432770	439477	-	1788	protein_coding	uncharacterized transporter YBR287W-like%2C transcript variant X1	-
107840297	287.518	465.864	440.85	162.968	112.051	206.663	398.077	160.561	1.311	0.000271033	0.00643153	LOC107840297	NC_029984.1	146048398	146049831	-	924	protein_coding	cyclin-dependent kinase inhibitor 7-like	-
107863599	441.24	398.817	752.752	178.128	219.122	253.517	530.936	216.923	1.29238	0.000271089	0.00643153	LOC107863599	NC_029979.1	124651464	124652083	+	620	protein_coding	histone H2B-like	Histone
novel.7104	37.0072	11.5599	29.7574	82.6212	80.5107	97.0561	26.1082	86.7293	-1.74206	0.00027152	0.00643544	-	NW_015961609.1	109695	111942	-	2248	-	-	-
107864381	29.8905	18.4958	22.0425	60.6394	61.4206	69.4453	23.4763	63.8351	-1.45412	0.00027216	0.00644432	LOC107864381	NC_029979.1	247283223	247285092	-	1557	pseudogene	-	p450
107868213	232.007	288.998	202.791	117.489	92.9608	129.687	241.265	113.379	1.08941	0.000273988	0.00648127	LOC107868213	NC_029980.1	200315339	200318659	-	1157	protein_coding	NEP1-interacting protein-like 1	-
107871435	119.562	699.374	516.897	112.941	66.4006	113.79	445.278	97.7105	2.18878	0.000274313	0.00648262	LOC107871435	NC_029981.1	216578304	216581693	-	1823	protein_coding	probable pectate lyase 5	-
107874657	85.4013	677.41	222.629	67.4613	53.9505	63.5885	328.48	61.6668	2.41392	0.000277274	0.0065462	LOC107874657	NC_029982.1	9957106	9958215	+	1110	protein_coding	protein YLS9-like	-
novel.1181	34.1605	71.6714	34.1659	11.3699	14.1101	10.877	46.6659	12.119	1.94884	0.000278188	0.00656139	-	NC_029978.1	148651090	148652715	-	1626	-	-	-
107878555	122.409	128.315	149.889	43.2056	45.6504	74.4655	133.538	54.4405	1.29727	0.000282937	0.00666691	LOC107878555	NC_029983.1	212382330	212386221	+	1243	protein_coding	fatty-acid-binding protein 3%2C chloroplastic%2C transcript variant X1	-
107855007	501.021	254.318	954.441	154.631	97.1109	202.479	569.927	151.407	1.91265	0.000283639	0.00667696	LOC107855007	NW_015961318.1	1288576	1289322	-	747	protein_coding	photosystem II repair protein PSB27-H1%2C chloroplastic	-
107848440	83.978	1018.43	391.255	97.0231	74.7007	73.6288	497.887	81.7842	2.60625	0.000285334	0.00671033	LOC107848440	NC_029987.1	13958055	13960210	+	960	protein_coding	inactive protein RESTRICTED TEV MOVEMENT 2-like	-
107851258	179.343	166.463	102.498	338.065	352.753	297.862	149.434	329.56	-1.14412	0.000287437	0.00675323	LOC107851258	NC_029988.1	228244007	228245394	+	1388	protein_coding	cell wall protein IFF6-like	-
107868693	705.984	623.079	525.714	347.161	346.113	341.37	618.259	344.881	0.841168	0.000289625	0.00679804	LOC107868693	NC_029977.1	15394313	15402127	+	2588	protein_coding	protein NETWORKED 4A%2C transcript variant X2	-
107872840	3554.12	3676.05	2501.83	1695.63	1658.36	1815.62	3244	1723.2	0.912567	0.0002909	0.00682136	LOC107872840	NC_029982.1	33312295	33313240	+	946	protein_coding	ATP synthase subunit b'%2C chloroplastic	-
107862423	271.861	399.973	368.11	187.982	175.962	153.114	346.648	172.353	1.00926	0.000293597	0.00687795	LOC107862423	NC_029979.1	16710303	16711914	+	1008	protein_coding	uncharacterized LOC107862423	-
107860213	236.277	183.802	473.914	84.8952	108.731	109.606	297.998	101.078	1.56133	0.000294176	0.00688484	LOC107860213	NC_029978.1	153935576	153941326	+	1186	protein_coding	probable prolyl 4-hydroxylase 9%2C transcript variant X1	-
107875827	1040.47	927.104	912.56	470.713	496.345	625.845	960.046	530.968	0.854377	0.000294515	0.00688614	LOC107875827	NC_029982.1	12953753	12955315	+	832	protein_coding	50S ribosomal protein L29%2C chloroplastic	-
107850578	5032.98	4711.82	3750.53	7863.42	9417.27	7440.69	4498.44	8240.46	-0.873398	0.000296061	0.00691561	LOC107850578	NC_029988.1	228543564	228554983	+	1836	protein_coding	glutamate decarboxylase	-
107838881	691.751	830.001	587.433	1304.51	1565.39	1185.59	703.062	1351.83	-0.943242	0.000297247	0.00693662	LOC107838881	NC_029984.1	36238429	36266944	+	2355	protein_coding	ATP-dependent zinc metalloprotease FTSH 4%2C mitochondrial-like	AAA
107878109	1921.53	1410.31	2604.32	685.225	526.225	1057.58	1978.72	756.342	1.38757	0.000298669	0.00696311	LOC107878109	NC_029983.1	163386392	163387975	+	1584	protein_coding	fasciclin-like arabinogalactan protein 2	-
107874972	46.9707	3.46797	91.4764	3.78996	0.830008	5.02014	47.305	3.21337	3.87909	0.000299554	0.00697702	LOC107874972	NC_029982.1	79207674	79210391	+	904	protein_coding	calmodulin-like protein 8	-
107848441	55.5109	138.719	61.719	234.22	281.373	233.437	85.3162	249.676	-1.54595	0.000300181	0.00698377	LOC107848441	NC_029987.1	171434650	171437244	-	1368	protein_coding	uncharacterized WD repeat-containing protein alr3466	WD40
107876241	55.5109	68.2034	91.4764	25.7718	24.9002	30.1209	71.7302	26.9309	1.41868	0.000300421	0.00698377	LOC107876241	NC_029977.1	78099737	78101936	+	1163	protein_coding	uncharacterized LOC107876241	-
107852724	12.8102	67.0474	22.0425	3.78996	4.98005	5.02014	33.9667	4.59672	2.89332	0.00030113	0.00699354	LOC107852724	NW_015960613.1	6200	7600	-	1401	protein_coding	uncharacterized LOC107852724	-
107840420	3231.02	1813.75	2595.51	1255.99	1196.87	1233.28	2546.76	1228.72	1.05128	0.000303337	0.00703805	LOC107840420	NC_029984.1	148795982	148800284	+	2913	protein_coding	uncharacterized LOC107840420%2C transcript variant X2	-
107879596	45.5474	547.939	158.706	46.2376	32.3703	35.9777	250.731	38.1952	2.71516	0.000303992	0.00703978	LOC107879596	NC_029984.1	1847357	1851883	+	888	protein_coding	probable transmembrane ascorbate ferrireductase 3	Cytochrom_B561
107869528	633.393	378.009	208.302	1054.37	1313.07	1184.75	406.568	1184.06	-1.54372	0.000303993	0.00703978	LOC107869528	NC_029980.1	26061476	26063340	-	1776	protein_coding	7-deoxyloganetin glucosyltransferase-like	UDPGT
107875710	868.247	871.617	656.867	1440.94	1498.16	1345.4	798.91	1428.17	-0.838572	0.000304494	0.00704465	LOC107875710	NC_029982.1	10571932	10575231	-	2393	protein_coding	protein ETHYLENE INSENSITIVE 3-like	EIN3
107872240	176.496	8.09193	139.97	3.78996	4.98005	19.2439	108.186	9.33796	3.53676	0.000305747	0.00705899	LOC107872240	NC_029981.1	322021	323286	-	602	protein_coding	protein GAST1-like	-
107843750	475.401	667.006	603.965	306.229	267.262	337.186	582.124	303.559	0.940214	0.000305967	0.00705899	LOC107843750	NC_029986.1	199152082	199155153	-	688	protein_coding	50S ribosomal protein 5%2C chloroplastic-like	-
107872856	54.0875	55.4875	93.6807	24.2558	9.13008	21.754	67.7519	18.3799	1.88226	0.000305988	0.00705899	LOC107872856	NC_029982.1	33772831	33775550	-	1016	protein_coding	myb family transcription factor APL-like%2C transcript variant X1	Myb_DNA-binding
107875799	185.036	172.243	136.664	84.8952	80.5107	77.8122	164.647	81.0727	1.01954	0.000311323	0.00717252	LOC107875799	NC_029982.1	12379366	12380864	-	1499	protein_coding	inositol-tetrakisphosphate 1-kinase 5-like	-
107849942	37.0072	19.6518	26.451	84.1372	66.4006	75.3022	27.7034	75.28	-1.45444	0.000311501	0.00717252	LOC107849942	NC_029988.1	19590792	19592913	-	1562	lncRNA	uncharacterized LOC107849942	-
107863525	35.5839	13.8719	79.3531	5.30595	2.49002	9.2036	42.9363	5.66652	2.9255	0.00031336	0.00720846	LOC107863525	NC_029979.1	102371747	102375663	-	769	protein_coding	uncharacterized LOC107863525	-
107840969	254.781	515.572	260.102	855.016	730.407	1104.43	343.485	896.618	-1.3835	0.000314498	0.00722778	LOC107840969	NC_029985.1	7147669	7169833	+	2232	protein_coding	hexokinase-2%2C transcript variant X2	-
107855682	42.7007	68.2034	54.0042	15.1599	22.4102	8.36691	54.9694	15.3123	1.84649	0.00031595	0.00725427	LOC107855682	NW_015961457.1	83	2088	+	517	protein_coding	calcineurin B-like protein 1	-
107861941	940.838	1063.51	696.544	473.745	463.144	476.077	900.297	470.989	0.934433	0.000316723	0.00726513	LOC107861941	NC_029979.1	5893365	5894504	+	1140	protein_coding	uncharacterized protein At1g15400	-
107847859	109.598	65.8914	56.2084	169.032	200.032	192.439	77.2327	187.168	-1.28488	0.000319222	0.00731554	LOC107847859	NC_029987.1	196837780	196842163	+	3024	protein_coding	pentatricopeptide repeat-containing protein At4g32450%2C mitochondrial-like%2C transcript variant X1	PPR
107857303	82.5546	53.1756	228.14	25.7718	24.9002	32.6309	121.29	27.7676	2.12956	0.000321606	0.0073632	LOC107857303	NC_029977.1	272115942	272116960	-	785	protein_coding	early nodulin-like protein 3	Cu_bind_like
107845640	216.35	189.582	139.97	360.047	346.943	371.491	181.967	359.493	-0.985225	0.000323407	0.00739743	LOC107845640	NC_029986.1	5512709	5522140	-	3172	lncRNA	uncharacterized LOC107845640%2C transcript variant X2	-
107877928	1282.44	873.929	1146.21	461.618	382.633	650.945	1100.86	498.399	1.1431	0.000324067	0.00740554	LOC107877928	NC_029983.1	98093327	98096369	-	1047	protein_coding	peroxiredoxin Q%2C chloroplastic	-
107864376	126.679	60.1115	69.4339	218.302	209.162	213.356	85.408	213.607	-1.33006	0.000325311	0.00742695	LOC107864376	NC_029979.1	247183880	247188715	-	2399	pseudogene	-	p450
107850844	22.7737	82.0753	29.7574	169.79	258.132	121.32	44.8688	183.081	-2.02371	0.000328905	0.00750015	LOC107850844	NC_029977.1	297717625	297724881	+	2277	protein_coding	protein NRT1/ PTR FAMILY 7.3-like	-
107845446	99.6349	199.986	184.055	72.0093	55.6105	59.405	161.225	62.3416	1.37315	0.000329136	0.00750015	LOC107845446	NC_029986.1	2146942	2152301	+	1232	protein_coding	protein trichome birefringence-like 42	-
107878318	7.11678	33.5237	141.072	4.54796	8.30008	3.34676	60.5709	5.39826	3.49305	0.000329514	0.00750171	LOC107878318	NC_029983.1	195532706	195534482	+	1206	protein_coding	endochitinase 4	-
107860490	128.102	332.925	159.808	71.2513	50.6305	76.9755	206.945	66.2858	1.64367	0.000330072	0.00750737	LOC107860490	NC_029978.1	159121605	159123468	+	1864	protein_coding	UDP-glycosyltransferase 708D1-like	UDPGT
107843989	224.89	195.362	167.523	367.626	400.064	334.676	195.925	367.455	-0.909678	0.000330718	0.007515	LOC107843989	NC_029986.1	204089004	204094084	+	2137	protein_coding	uncharacterized LOC107843989%2C transcript variant X3	DnaJ
107840207	24.197	90.1672	60.6169	17.4338	6.64006	3.34676	58.3271	9.14022	2.66896	0.000331154	0.00751784	LOC107840207	NC_029984.1	144131319	144133895	-	2174	protein_coding	probable indole-3-acetic acid-amido synthetase GH3.1	-
107863182	1491.68	1195.29	2182.21	752.687	513.775	804.896	1623.06	690.453	1.2332	0.000332307	0.00753696	LOC107863182	NC_029979.1	46198806	46202681	+	780	protein_coding	SUMO-conjugating enzyme UBC9%2C transcript variant X1	UQ_con
novel.1571	4.27007	0	0	21.2238	23.2402	16.7338	1.42336	20.3993	-4.00488	0.000335113	0.00759048	-	NC_029979.1	244787693	244796814	+	3299	-	-	-
107860380	14168.1	2792.87	8997.76	2481.67	1802.78	2500.03	8652.9	2261.49	1.93586	0.000335293	0.00759048	LOC107860380	NC_029978.1	157107428	157110241	+	1779	protein_coding	zinc finger protein CONSTANS-LIKE 2-like	zf-B_box
107842419	17.0803	180.334	67.2297	16.6758	11.6201	10.0403	88.2148	12.7787	2.78803	0.000336117	0.00760203	LOC107842419	NC_029985.1	60835396	60838575	-	2253	protein_coding	asparagine--tRNA ligase%2C cytoplasmic 2%2C transcript variant X2	tRNA-synt_2
107855027	18.5036	234.666	136.664	17.4338	24.0702	17.5705	129.944	19.6915	2.7248	0.000340971	0.00769656	LOC107855027	NC_029977.1	73152656	73154494	-	925	protein_coding	inactive protein RESTRICTED TEV MOVEMENT 2-like	-
107859246	37.0072	20.8078	7.71488	101.571	143.591	56.895	21.8433	100.686	-2.22085	0.000340983	0.00769656	LOC107859246	NC_029978.1	131068721	131072906	-	3960	protein_coding	probable LRR receptor-like serine/threonine-protein kinase At3g47570%2C transcript variant X2	LRRNT_2
107871144	227.737	927.104	413.297	144.777	122.841	167.338	522.713	144.985	1.8508	0.00034125	0.00769656	LOC107871144	NC_029981.1	198709837	198718856	-	1117	protein_coding	probable chalcone--flavonone isomerase 3%2C transcript variant X2	-
107870869	128.102	221.95	224.834	81.8632	83.0008	84.5058	191.629	83.1232	1.2081	0.000342228	0.00770603	LOC107870869	NC_029981.1	137780420	137781146	+	592	lncRNA	uncharacterized LOC107870869	-
107870983	85.4013	232.354	179.647	58.3654	45.6504	61.0784	165.801	55.0314	1.59368	0.000342306	0.00770603	LOC107870983	NC_029981.1	173402718	173407045	+	2496	protein_coding	ABC transporter G family member 11-like	ABC2_membrane
107875469	34.1605	343.329	186.259	41.6896	25.7302	29.2842	187.916	32.2347	2.5441	0.0003432	0.00771898	LOC107875469	NC_029982.1	4892136	4896049	-	1957	protein_coding	phosphoinositide phospholipase C 2-like%2C transcript variant X2	PI-PLC-Y
107873461	2537.84	3034.47	1231.07	5055.05	6309.72	6204.06	2267.8	5856.28	-1.3688	0.000346978	0.0077967	LOC107873461	NC_029982.1	185748588	185756907	+	2318	protein_coding	phosphomethylpyrimidine synthase%2C chloroplastic%2C transcript variant X1	-
107860117	983.539	1002.24	847.535	2006.41	1955.5	1395.6	944.439	1785.83	-0.919305	0.000347304	0.00779681	LOC107860117	NC_029978.1	151893580	151895707	-	817	protein_coding	protein C2-DOMAIN ABA-RELATED 3-like	C2
novel.6340	1.42336	0	0	12.1279	19.9202	11.7137	0.474452	14.5872	-5.06052	0.000348433	0.00781489	-	NC_029988.1	224826585	224828621	-	448	-	PF09331:Domain of unknown function (DUF1985)	-
novel.5844	83.978	34.6797	52.902	140.987	162.681	153.114	57.1866	152.261	-1.42148	0.00035022	0.00784772	-	NC_029988.1	4053338	4058071	+	3075	-	PF05856:ARP2/3 complex 20 kDa subunit (ARPC4)	-
107877661	17.0803	34.6797	29.7574	6.82193	4.98005	5.85683	27.1725	5.88627	2.2116	0.00035142	0.00786733	LOC107877661	NC_029983.1	11123588	11126166	+	2363	protein_coding	formin-2-like	-
107860877	21.3503	75.1394	30.8595	153.873	168.492	125.504	42.4497	149.289	-1.8077	0.000352159	0.00787658	LOC107860877	NC_029978.1	33453454	33462447	-	1949	protein_coding	putative clathrin assembly protein At5g57200	-
107878430	693.174	823.065	1013.96	442.668	478.914	438.426	843.398	453.336	0.896403	0.00035419	0.00791471	LOC107878430	NC_029983.1	204548380	204563219	+	3029	protein_coding	serine/threonine-protein kinase EDR1%2C transcript variant X1	Pkinase_Tyr
107859406	68.3211	90.1672	54.0042	156.904	151.891	158.971	70.8308	155.922	-1.13873	0.000357236	0.00797532	LOC107859406	NC_029978.1	137053613	137056847	+	2460	protein_coding	probable polyol transporter 4	Sugar_tr
107877762	3709.26	5607.71	2679.27	1638.78	1979.57	1355.44	3998.75	1657.93	1.27017	0.000357561	0.00797532	LOC107877762	NC_029983.1	29752956	29755384	-	1055	protein_coding	cucumber peeling cupredoxin-like	Cu_bind_like
novel.2795	91.0947	124.847	131.153	231.188	225.762	229.253	115.698	228.734	-0.978809	0.000358659	0.00799245	-	NC_029981.1	29244905	29247348	-	2444	-	PF14244:gag-polypeptide of LTR copia-type	-
107864223	61.2043	124.847	108.008	25.7718	40.6704	35.9777	98.0199	34.1399	1.52752	0.000359435	0.00800238	LOC107864223	NC_029979.1	241103074	241114128	+	2323	protein_coding	protein NRT1/ PTR FAMILY 5.2-like%2C transcript variant X2	-
107852412	51.2408	45.0836	131.153	18.1918	19.0902	21.754	75.8258	19.6787	1.95063	0.000362968	0.00807184	LOC107852412	NW_015960491.1	539082	542435	-	1155	protein_coding	NDR1/HIN1-Like protein 3	-
107863121	300.328	287.842	202.791	512.403	605.906	466.873	263.654	528.394	-1.00449	0.000363354	0.00807184	LOC107863121	NC_029979.1	41439355	41441732	+	2378	protein_coding	pentatricopeptide repeat-containing protein At3g49240	PPR
107869979	2966.27	7523.18	3884.99	1578.9	2135.61	1067.62	4791.48	1594.04	1.58784	0.000363554	0.00807184	LOC107869979	NC_029981.1	117738	118733	-	904	protein_coding	putative methyltransferase DDB_G0268948	Methyltransf_11
107860755	8.54013	34.6797	11.0213	1.51599	1.66002	0	18.0804	1.05867	4.08603	0.000365265	0.00810239	LOC107860755	NC_029978.1	163096749	163097666	+	918	protein_coding	putative calcium-binding protein CML19	-
107840943	1604.12	13.8719	1972.81	33.3517	22.4102	50.2014	1196.93	35.3211	5.08269	0.000366302	0.00811797	LOC107840943	NC_029985.1	6610724	6615895	-	1264	protein_coding	inositol oxygenase 4	-
107875566	209.233	448.524	234.753	130.375	103.751	106.26	297.503	113.462	1.39128	0.000367206	0.00813056	LOC107875566	NC_029982.1	6890470	6893072	+	2292	protein_coding	ankyrin repeat-containing protein At5g02620	-
107875875	136.642	127.159	116.825	56.8495	63.0806	67.7719	126.875	62.5673	1.01921	0.000367578	0.00813136	LOC107875875	NC_029982.1	15442078	15448278	-	2424	protein_coding	zinc finger CCCH domain-containing protein 67-like%2C transcript variant X3	zf-CCCH
107879581	83.978	104.039	59.5148	172.064	205.842	177.378	82.5106	185.095	-1.16686	0.000368505	0.00814443	LOC107879581	NC_029984.1	153295107	153297407	-	1645	pseudogene	-	Lig_chan
107869807	950.801	834.625	1064.65	516.951	525.395	594.887	950.027	545.744	0.799937	0.000369524	0.00815951	LOC107869807	NC_029977.1	19986325	19994044	-	1293	protein_coding	secretory carrier-associated membrane protein 4%2C transcript variant X2	-
107869678	35.5839	238.134	159.808	39.4156	24.9002	20.0806	144.509	28.1321	2.36149	0.000370749	0.00816767	LOC107869678	NC_029980.1	98593439	98604990	-	1020	protein_coding	pathogenesis-related protein 5-like	Thaumatin
107872773	153.722	350.265	198.383	90.9591	91.3008	85.3424	234.123	89.2008	1.39363	0.000370795	0.00816767	LOC107872773	NC_029982.1	29876887	29881223	+	523	protein_coding	uncharacterized LOC107872773	-
107849511	37.0072	110.975	111.315	15.9178	9.96009	30.9576	86.4323	18.9452	2.19471	0.000370905	0.00816767	LOC107849511	NC_029977.1	284258177	284268478	+	1843	protein_coding	uncharacterized LOC107849511	-
107859144	182.189	374.541	282.144	134.165	73.8707	104.586	279.625	104.207	1.42463	0.000372028	0.00818496	LOC107859144	NC_029978.1	128094078	128095509	-	1339	protein_coding	two-component response regulator ORR10-like	Response_reg
107870411	125.255	1251.94	646.948	166.758	95.4509	110.443	674.714	124.217	2.44157	0.000374618	0.00822832	LOC107870411	NC_029981.1	22545662	22547303	+	1183	protein_coding	protein RESTRICTED TEV MOVEMENT 3	MATH
107840643	55.5109	105.195	80.4552	25.0138	33.2003	30.1209	80.3871	29.445	1.45462	0.000374679	0.00822832	LOC107840643	NC_029984.1	152806249	152810424	+	1926	protein_coding	metal-independent phosphoserine phosphatase%2C transcript variant X2	-
107864030	570.765	2924.66	1487.87	473.745	476.424	215.029	1661.1	388.4	2.09662	0.000376068	0.00825137	LOC107864030	NC_029979.1	231906014	231909329	+	2158	protein_coding	glucose-6-phosphate/phosphate translocator 2%2C chloroplastic-like	-
107871378	378.613	217.326	212.71	598.814	595.115	585.683	269.55	593.204	-1.1408	0.000378049	0.00828732	LOC107871378	NC_029981.1	215774074	215782726	+	5190	protein_coding	pleiotropic drug resistance protein 2-like%2C transcript variant X1	ABC_tran
107879653	392.846	675.098	402.276	164.484	249.002	104.586	490.073	172.691	1.50515	0.000380215	0.00832726	LOC107879653	NC_029984.1	60198506	60200252	-	895	protein_coding	probable WRKY transcription factor 50	WRKY
107865998	5.69342	15.0279	14.3276	0.757993	0	0	11.683	0.252664	5.34461	0.000381627	0.00835064	LOC107865998	NC_029977.1	6286103	6287774	+	1313	protein_coding	ethylene-responsive transcription factor ERF027-like	AP2
107853805	1400.58	3770.84	7318.12	786.038	1428.44	416.672	4163.18	877.051	2.24704	0.000383839	0.00839146	LOC107853805	NW_015960972.1	7604	9817	-	1358	protein_coding	1-aminocyclopropane-1-carboxylate oxidase 1	2OG-FeII_Oxy
107864752	75.4378	579.151	204.995	58.3654	58.9305	55.2216	286.528	57.5059	2.31786	0.000386975	0.00844591	LOC107864752	NC_029979.1	7681656	7682744	-	525	protein_coding	78 kDa glucose-regulated protein homolog	-
novel.3951	138.065	160.683	204.995	66.7034	68.8906	92.036	167.915	75.8766	1.14912	0.000387027	0.00844591	-	NC_029983.1	187438790	187440550	-	1243	-	-	-
107848048	5.69342	5.77995	8.81701	29.5617	22.4102	42.6712	6.76346	31.5477	-2.20982	0.000393812	0.00858623	LOC107848048	NC_029987.1	35246715	35252216	-	1046	protein_coding	mitogen-activated protein kinase 18-like	-
107862997	1303.79	1347.88	1138.5	735.253	801.787	769.755	1263.39	768.932	0.716261	0.000396361	0.00863404	LOC107862997	NC_029979.1	36175959	36177440	+	1482	protein_coding	uncharacterized LOC107862997	-
107842947	2562.04	1408	2263.77	982.359	1068.22	831.67	2077.93	960.75	1.11271	0.000397325	0.00864727	LOC107842947	NC_029985.1	214860344	214864048	-	2168	protein_coding	ankyrin repeat-containing protein At5g02620-like	-
107870651	392.846	360.669	468.403	215.27	241.532	220.05	407.306	225.617	0.852895	0.000398489	0.00866481	LOC107870651	NC_029981.1	65376954	65383362	+	1886	protein_coding	putative receptor-like protein kinase At4g00960	Pkinase_Tyr
107840541	372.919	324.833	228.14	568.495	620.016	671.026	308.631	619.845	-1.00775	0.000400051	0.00869098	LOC107840541	NC_029984.1	150891000	150892405	+	1280	protein_coding	PI-PLC X-box domain-containing protein DDB_G0293730-like	PI-PLC-X
novel.2930	21.3503	8.09193	6.61275	48.5115	41.5004	51.8748	12.0183	47.2956	-2.01034	0.000401107	0.00870578	-	NC_029981.1	183345856	183381564	-	1129	-	-	-
107866958	538.028	554.875	437.544	854.258	966.959	848.404	510.149	889.874	-0.803198	0.000401451	0.00870578	LOC107866958	NC_029980.1	4728746	4735468	+	2217	protein_coding	GTPase HflX-like	-
107843505	27.0438	63.5795	46.2893	13.6439	11.6201	13.387	45.6375	12.8837	1.83042	0.000402497	0.00872064	LOC107843505	NC_029986.1	178100392	178106298	+	5641	lncRNA	uncharacterized LOC107843505%2C transcript variant X2	-
novel.3086	11.3868	5.77995	18.7361	43.9636	41.5004	52.7115	11.9676	46.0585	-1.93715	0.000404528	0.00875584	-	NC_029982.1	42627982	42628846	+	485	-	-	-
107853873	12.8102	11.5599	17.634	1.51599	0.830008	1.67338	14.0014	1.33979	3.38544	0.000404844	0.00875584	LOC107853873	NW_015960988.1	459486	474783	+	1365	pseudogene	-	-
107843886	68.3211	302.869	158.706	46.9955	42.3304	50.2014	176.632	46.5091	1.9272	0.000405281	0.00875746	LOC107843886	NC_029986.1	202324774	202338016	+	1368	protein_coding	uncharacterized LOC107843886%2C transcript variant X1	-
107872814	81.1313	300.557	122.336	49.2695	48.1404	39.3245	168.008	45.5781	1.88354	0.000407605	0.00879983	LOC107872814	NC_029982.1	31686420	31689112	+	2693	protein_coding	putative serine/threonine-protein kinase-like protein CCR3	Pkinase
107858469	596.386	6304.77	2042.24	576.832	523.735	560.583	2981.13	553.717	2.42872	0.000409049	0.00882011	LOC107858469	NC_029978.1	45189499	45191021	-	1081	protein_coding	protein PHLOEM PROTEIN 2-LIKE A9-like	-
107851785	8.54013	12.7159	9.91913	38.6576	37.3503	32.6309	10.3917	36.213	-1.79323	0.000409273	0.00882011	LOC107851785	NC_029988.1	228589161	228591296	-	2136	protein_coding	pentatricopeptide repeat-containing protein At3g14330	PPR
107869592	101.058	818.441	522.408	116.731	56.4405	107.933	480.636	93.7015	2.35921	0.00041082	0.00883818	LOC107869592	NC_029980.1	41328063	41331781	+	1464	protein_coding	aspartic proteinase Asp1-like	-
107858803	216.35	517.884	255.693	105.361	143.591	102.913	329.976	117.288	1.49341	0.000410841	0.00883818	LOC107858803	NC_029978.1	104250184	104252066	+	1122	protein_coding	probable glutathione S-transferase	GST_N
107869450	18.5036	203.454	54.0042	12.1279	14.1101	13.387	91.9874	13.2084	2.80275	0.000412063	0.0088566	LOC107869450	NC_029980.1	9428152	9430619	+	2466	protein_coding	subtilisin-like protease SBT1.8	Peptidase_S8
107864597	32.7372	20.8078	28.6553	71.2513	62.2506	76.9755	27.4001	70.1591	-1.36326	0.000413394	0.00887734	LOC107864597	NC_029979.1	255747283	255749205	+	1923	protein_coding	histone-lysine N-methyltransferase ASHR2	SET
107860239	2083.79	3323.47	1971.7	1181.71	1292.32	977.255	2459.66	1150.43	1.09635	0.000414448	0.0088921	LOC107860239	NC_029978.1	154369346	154370841	-	1496	protein_coding	transcription factor MYB44-like	Myb_DNA-binding
107845968	382.883	384.945	460.689	251.654	224.102	216.703	409.505	230.819	0.827472	0.000415534	0.0089075	LOC107845968	NC_029986.1	139414433	139417595	+	1838	protein_coding	uncharacterized LOC107845968%2C transcript variant X2	-
107859092	345.875	1238.07	688.829	244.074	239.042	244.314	757.59	242.476	1.64414	0.000417869	0.00894963	LOC107859092	NC_029978.1	125860295	125864337	-	3061	protein_coding	potassium channel KAT1	cNMP_binding
107860833	139.489	1717.8	429.829	137.955	109.561	127.177	762.373	124.898	2.60999	0.000418789	0.00896142	LOC107860833	NC_029978.1	5768743	5769522	-	583	protein_coding	copper transport protein CCH	-
107847805	427.007	977.968	424.318	219.818	249.832	198.296	609.764	222.649	1.4539	0.000430259	0.00919873	LOC107847805	NC_029987.1	216835329	216838043	-	1992	protein_coding	uncharacterized LOC107847805	-
107862952	216.35	380.321	363.702	143.261	150.231	148.931	320.124	147.474	1.1202	0.000437012	0.00933486	LOC107862952	NC_029979.1	34712775	34720717	+	1296	protein_coding	ADP-ribosylation factor 1-like 2	Arf
107857141	34.1605	47.3956	76.0467	12.1279	19.0902	5.85683	52.5343	12.3583	2.09204	0.000437433	0.00933563	LOC107857141	NC_029977.1	209653665	209654359	+	695	protein_coding	monothiol glutaredoxin-S10-like	-
107855204	82.5546	107.507	244.672	37.1416	27.3902	55.2216	144.911	39.9178	1.86306	0.000438696	0.00935435	LOC107855204	NW_015961357.1	166998	167726	+	729	protein_coding	histone H3.2-like	Histone
107874755	5.69342	30.0557	93.6807	2.27398	4.15004	5.85683	43.1433	4.09362	3.40862	0.000443302	0.00944424	LOC107874755	NC_029982.1	19688689	19692079	-	1114	protein_coding	AP2-like ethylene-responsive transcription factor At1g16060	AP2
novel.1481	2.84671	6.93594	7.71488	27.2877	24.9002	30.9576	5.83251	27.7152	-2.21684	0.000445004	0.00946821	-	NC_029979.1	186986193	187062293	+	900	-	-	-
107839127	163.686	246.226	271.123	103.845	114.541	101.24	227.012	106.542	1.09404	0.000445209	0.00946821	LOC107839127	NC_029984.1	115960874	115972364	-	1559	protein_coding	uncharacterized LOC107839127%2C transcript variant X2	-
107842758	1175.69	747.926	1036	485.873	504.645	546.359	986.538	512.292	0.945029	0.000452054	0.00960535	LOC107842758	NC_029985.1	178403003	178406460	-	1686	protein_coding	uncharacterized LOC107842758	-
107845145	241.97	146.811	189.566	407.8	358.563	398.265	192.782	388.209	-1.01269	0.000452744	0.00960761	LOC107845145	NC_029986.1	200274618	200277583	+	1067	protein_coding	zinc finger protein GIS-like	-
107859877	818.429	686.658	790.224	483.599	449.034	444.283	765.104	458.972	0.736783	0.000453323	0.00960761	LOC107859877	NC_029978.1	147530341	147533281	-	2941	protein_coding	uncharacterized LOC107859877	Arm
novel.2672	149.452	25.4318	134.459	10.6119	1.66002	24.264	103.114	12.1786	3.08198	0.00045335	0.00960761	-	NC_029981.1	192555674	192556625	+	952	-	-	-
107840600	546.568	136.407	580.82	123.553	106.241	117.973	421.265	115.922	1.86114	0.0004566	0.00966803	LOC107840600	NC_029984.1	152087265	152093844	-	2110	protein_coding	serine/threonine-protein kinase STY46%2C transcript variant X2	Pkinase_Tyr
107844759	24.197	149.123	77.1488	20.4658	12.4501	16.7338	83.4895	16.5499	2.3368	0.000461414	0.00976142	LOC107844759	NC_029977.1	226639915	226642981	-	1397	protein_coding	malate dehydrogenase-like	-
107851224	149.452	1632.26	393.459	135.681	114.541	124.667	725.056	124.963	2.53686	0.000462179	0.00976907	LOC107851224	NC_029988.1	3000969	3001914	-	738	protein_coding	prosaposin-like	-
107862200	639.087	798.789	1067.96	1528.87	1912.34	1618.16	835.279	1686.46	-1.0129	0.000462642	0.00977034	LOC107862200	NC_029979.1	10767315	10772618	+	2449	protein_coding	alpha-dioxygenase 2-like	An_peroxidase
107840473	1414.82	1749.01	1779.93	1036.93	863.208	961.357	1647.92	953.833	0.789088	0.000464767	0.00980667	LOC107840473	NC_029984.1	149884644	149886482	+	1505	protein_coding	GATA transcription factor 5	GATA
107843152	155.146	68.2034	84.8637	248.622	236.552	309.576	102.738	264.916	-1.37238	0.000468093	0.00986826	LOC107843152	NC_029985.1	235801469	235803320	-	1852	protein_coding	purine-uracil permease NCS1	-
107859476	378.613	291.31	196.178	609.426	585.985	688.596	288.7	628.003	-1.12337	0.00047168	0.00993523	LOC107859476	NC_029978.1	138916027	138918163	+	2137	protein_coding	uncharacterized LOC107859476	-
107845682	641.933	698.218	1702.78	284.247	346.943	402.448	1014.31	344.546	1.55831	0.000472468	0.00994317	LOC107845682	NC_029986.1	27562096	27565216	+	1837	protein_coding	tryptophan synthase beta chain 1-like	PALP
novel.5557	14.2336	68.2034	11.0213	3.78996	3.32003	3.34676	31.1527	3.48559	3.16194	0.00047572	0.0100029	-	NC_029987.1	205578999	205581742	+	1550	-	-	-
107874578	61.2043	60.1115	90.3743	25.0138	29.8803	28.4475	70.5634	27.7805	1.34934	0.000479287	0.0100692	LOC107874578	NC_029982.1	2362553	2366297	+	1303	protein_coding	tropinone reductase homolog At5g06060-like%2C transcript variant X1	-
107853633	12.8102	34.6797	31.9616	6.06394	1.66002	5.02014	26.4839	4.24803	2.64106	0.000484183	0.0101632	LOC107853633	NC_029977.1	28856436	28859231	+	1312	protein_coding	probable 2-oxoglutarate-dependent dioxygenase AOP1	2OG-FeII_Oxy
107854628	37.0072	0	50.6978	0.757993	0	0.836691	29.235	0.531561	5.77176	0.000486402	0.010201	LOC107854628	NW_015961194.1	1212	4529	+	1640	protein_coding	histidine decarboxylase-like	-
novel.3734	15.6569	21.9638	37.4723	3.78996	3.32003	6.69352	25.031	4.60117	2.45576	0.000487059	0.0102059	-	NC_029983.1	196957875	196960248	+	2374	-	PF03108:MuDR family transposase|PF10551:MULE transposase domain	MuDR
107850971	2573.43	4560.38	1609.1	7682.26	9913.61	6782.21	2914.3	8126.03	-1.47939	0.000492272	0.0103062	LOC107850971	NC_029988.1	18820490	18826061	-	1564	protein_coding	bifunctional nuclease 1-like	-
107860468	389.999	226.574	339.455	144.777	135.291	166.501	318.676	148.856	1.0971	0.000492951	0.0103115	LOC107860468	NC_029978.1	158737886	158741115	+	1907	protein_coding	UDP-glucose 6-dehydrogenase 3-like%2C transcript variant X1	-
107875151	125.255	2554.74	342.761	147.809	73.0407	141.401	1007.58	120.75	3.06086	0.000494376	0.0103324	LOC107875151	NC_029982.1	211318401	211319168	-	768	protein_coding	uncharacterized LOC107875151	-
107866897	330.218	383.789	381.336	189.498	179.282	232.6	365.114	200.46	0.866128	0.000495281	0.0103424	LOC107866897	NC_029980.1	2869235	2874324	+	2110	protein_coding	hexokinase-2%2C chloroplastic	-
107850951	287.518	378.009	386.846	169.79	161.851	211.683	350.791	181.108	0.955395	0.000496164	0.0103519	LOC107850951	NC_029988.1	33317896	33336572	-	1259	protein_coding	agamous-like MADS-box protein AGL27	SRF-TF
107845892	48.3941	16.1839	14.3276	112.183	74.7007	104.586	26.3019	97.1566	-1.90487	0.000499067	0.0104035	LOC107845892	NC_029986.1	114476396	114481768	+	3291	lncRNA	uncharacterized LOC107845892%2C transcript variant X2	-
107860613	17.0803	20.8078	14.3276	0	0	3.34676	17.4052	1.11559	3.99334	0.000501202	0.0104391	LOC107860613	NC_029978.1	161072566	161077106	-	2166	protein_coding	alpha-dioxygenase 1-like	An_peroxidase
novel.5277	39.8539	62.4235	77.1488	20.4658	22.4102	20.0806	59.8087	20.9855	1.51767	0.000503524	0.0104784	-	NC_029986.1	190963551	190999585	-	598	-	-	-
107862629	88.248	171.087	204.995	68.2193	52.2905	35.141	154.777	51.8836	1.57815	0.000504456	0.0104888	LOC107862629	NC_029979.1	22681782	22683882	+	1424	protein_coding	vignain	Peptidase_C1
107876142	61.2043	149.123	87.0679	29.5617	34.8603	36.8144	99.1317	33.7455	1.55885	0.000504944	0.0104899	LOC107876142	NC_029977.1	76416407	76419420	-	1645	protein_coding	uncharacterized LOC107876142	-
107851535	75.4378	193.05	190.668	43.9636	64.7406	36.8144	153.052	48.5062	1.66098	0.000506011	0.0104944	LOC107851535	NC_029988.1	184822641	184823866	+	1226	protein_coding	fasciclin-like arabinogalactan protein 19	-
107849565	18.5036	89.0112	34.1659	10.6119	9.13008	5.85683	47.2269	8.53294	2.4702	0.000506025	0.0104944	LOC107849565	NC_029988.1	226531866	226533555	-	1690	protein_coding	putative UDP-rhamnose:rhamnosyltransferase 1	UDPGT
107867000	647.627	225.418	382.438	128.859	99.6009	182.399	418.494	136.953	1.61054	0.000506694	0.0104993	LOC107867000	NC_029980.1	5536864	5539687	-	2029	protein_coding	putative S-adenosyl-L-methionine-dependent methyltransferase MSMEG_0095/MSMEI_0092	-
107872957	51.2408	239.29	69.4339	28.8037	23.2402	27.6108	119.988	26.5516	2.17756	0.000511612	0.0105921	LOC107872957	NC_029982.1	44934995	44939662	-	2508	protein_coding	uncharacterized LOC107872957%2C transcript variant X2	-
107846605	308.868	347.953	308.595	535.901	507.135	582.337	321.805	541.791	-0.751153	0.000513091	0.0106117	LOC107846605	NC_029987.1	188507163	188507820	-	621	protein_coding	uncharacterized LOC107846605	-
107859292	150.876	290.154	159.808	74.2833	93.7909	72.7921	200.279	80.2887	1.32029	0.000513711	0.0106117	LOC107859292	NC_029978.1	132900810	132906099	+	1784	protein_coding	U-box domain-containing protein 7	-
107841153	2375.58	83.2313	1535.26	112.183	81.3407	276.945	1331.36	156.823	3.08569	0.000513873	0.0106117	LOC107841153	NC_029977.1	190760396	190763406	+	1532	protein_coding	basic 7S globulin	-
107843928	177.919	285.53	342.761	125.827	87.1508	123.83	268.737	112.269	1.26087	0.000515556	0.0106374	LOC107843928	NC_029986.1	203077518	203082247	-	1290	protein_coding	chaperone protein dnaJ 6	DnaJ
novel.374	72.5911	236.978	296.472	60.6394	33.2003	63.5885	202.014	52.4761	1.94643	0.000517768	0.010674	-	NC_029977.1	298957821	298958604	+	784	-	-	-
107855775	250.511	276.282	390.153	137.197	154.381	160.645	305.648	150.741	1.02175	0.000521629	0.0107444	LOC107855775	NW_015961483.1	418349	430089	-	1480	protein_coding	uncharacterized LOC107855775	-
107871133	14.2336	769.889	83.7616	25.0138	26.5602	24.264	289.295	25.2793	3.51701	0.000525267	0.0108079	LOC107871133	NC_029981.1	197287111	197289618	-	1881	misc_RNA	uncharacterized LOC107871133	-
107867193	25.6204	25.4318	4.4085	74.2833	78.0207	76.9755	18.4869	76.4265	-2.06087	0.000525704	0.0108079	LOC107867193	NC_029980.1	9881703	9883774	-	1928	pseudogene	-	p450
107847020	17.0803	12.7159	18.7361	0.757993	0	3.34676	16.1774	1.36825	3.57783	0.000526051	0.0108079	LOC107847020	NC_029987.1	214188899	214191146	-	2248	pseudogene	-	U-box
107859022	58.3576	141.031	214.915	37.8996	48.9704	25.9374	138.101	37.6025	1.87977	0.000527418	0.0108268	LOC107859022	NC_029978.1	122029192	122030671	-	1480	protein_coding	probable carboxylesterase 6	Abhydrolase_3
107852167	15.6569	122.535	67.2297	285.763	784.357	169.848	68.4738	413.323	-2.59011	0.000529508	0.0108605	LOC107852167	NW_015960421.1	3858	6759	+	1281	protein_coding	coatomer subunit beta'-1-like	WD40
107866376	11.3868	149.123	22.0425	3.78996	8.30008	6.69352	60.8507	6.26119	3.28636	0.000530841	0.0108786	LOC107866376	NC_029979.1	222246908	222247957	+	784	protein_coding	uncharacterized LOC107866376	-
107867536	327.372	323.677	549.961	179.644	174.302	199.969	400.337	184.638	1.11771	0.000532685	0.0109057	LOC107867536	NC_029980.1	30557561	30559545	+	1783	protein_coding	uncharacterized LOC107867536	-
107854029	37.0072	94.7912	83.7616	13.6439	22.4102	25.9374	71.8533	20.6638	1.80587	0.000533061	0.0109057	LOC107854029	NW_015961041.1	1314482	1316519	+	1477	protein_coding	fasciclin-like arabinogalactan protein 7%2C transcript variant X1	-
107873373	666.13	408.065	591.842	1017.23	1045.81	1245	555.345	1102.68	-0.990225	0.000535287	0.0109391	LOC107873373	NC_029982.1	161010281	161015375	-	2856	lncRNA	uncharacterized LOC107873373%2C transcript variant X2	-
107850278	4766.82	5146.47	5144.72	3186.6	2855.23	3400.31	5019.34	3147.38	0.673395	0.000535595	0.0109391	LOC107850278	NC_029988.1	227236628	227239106	+	1279	protein_coding	8-hydroxygeraniol dehydrogenase-like	ADH_N
107864646	375.766	2238	794.633	250.138	170.152	349.737	1136.13	256.675	2.14639	0.000536959	0.0109577	LOC107864646	NC_029979.1	258507995	258510008	-	2014	protein_coding	acyl-lipid (9-3)-desaturase-like	-
novel.824	15.6569	17.3399	23.1446	51.5435	43.9904	88.6892	18.7138	61.4077	-1.7065	0.000538384	0.0109775	-	NC_029978.1	97493924	97505172	+	2234	-	-	-
107862683	12.8102	198.83	57.3105	14.4019	9.13008	11.7137	89.6504	11.7485	2.93288	0.000539631	0.0109937	LOC107862683	NC_029979.1	24498411	24499916	-	1296	protein_coding	uncharacterized LOC107862683	-
107861786	173.649	1425.34	500.365	153.115	165.172	117.973	699.783	145.42	2.26704	0.000540544	0.0110017	LOC107861786	NC_029979.1	3442979	3446519	+	1406	protein_coding	auxin-responsive protein IAA26	-
107853224	284.671	187.27	346.068	124.311	135.291	98.7295	272.67	119.444	1.19069	0.000540933	0.0110017	LOC107853224	NC_029977.1	15548055	15549963	-	1275	protein_coding	expansin-like B1%2C transcript variant X2	-
novel.6994	0	0	0	12.1279	4.98005	12.5504	0	9.8861	-5.46269	0.000543191	0.0110383	-	NW_015961414.1	525820	527777	+	1157	-	-	-
107869796	1739.34	16991.9	6223.7	1996.55	1294.81	1666.69	8318.31	1652.68	2.3315	0.000547604	0.0111187	LOC107869796	NC_029980.1	196989441	196991501	-	829	protein_coding	uncharacterized LOC107869796	Glyoxalase
107856946	93.9415	97.1032	382.438	21.2238	30.7103	62.7518	191.161	38.2286	2.32493	0.000548457	0.0111267	LOC107856946	NW_015961809.1	58368	58921	-	554	protein_coding	histone H3.2	Histone
novel.6478	223.467	128.315	186.259	380.512	345.283	378.184	179.347	367.993	-1.03948	0.000550335	0.0111554	-	NW_015960517.1	2272792	2278343	+	2579	-	PF00249:Myb-like DNA-binding domain|PF00170:bZIP transcription factor	bZIP_1
107878480	111.022	12.7159	171.932	14.4019	3.32003	17.5705	98.5564	11.7641	3.06572	0.000554201	0.0112223	LOC107878480	NC_029983.1	209479328	209481130	-	1085	protein_coding	protodermal factor 1	-
107877433	99.6349	50.8636	102.498	217.544	184.262	200.806	84.332	200.87	-1.25432	0.000554561	0.0112223	LOC107877433	NC_029977.1	106211603	106214712	-	2766	lncRNA	uncharacterized LOC107877433	-
107872303	1.42336	87.8553	19.8383	3.03197	0	0.836691	36.3723	1.28955	4.79883	0.000556216	0.0112464	LOC107872303	NC_029981.1	8402356	8404285	+	701	protein_coding	major pollen allergen Ole e 10-like	-
107865776	9.96349	58.9555	25.3489	5.30595	3.32003	5.02014	31.4226	4.54871	2.79247	0.000557849	0.01127	LOC107865776	NC_029979.1	260782838	260786214	+	3302	protein_coding	putative calcium-transporting ATPase 13%2C plasma membrane-type	E1-E2_ATPase
107854441	167.956	218.482	487.14	93.2331	91.3008	107.933	291.193	97.489	1.58044	0.000558336	0.0112705	LOC107854441	NW_015961170.1	20133	20849	+	717	protein_coding	histone H3.2	Histone
107840971	1207.01	579.151	1032.69	386.576	246.512	459.343	939.616	364.144	1.36721	0.000559284	0.0112802	LOC107840971	NC_029985.1	7193898	7203321	+	2237	protein_coding	uncharacterized LOC107840971	-
107860378	197.846	193.05	144.378	319.115	338.643	327.983	178.425	328.58	-0.883003	0.000560378	0.0112929	LOC107860378	NC_029978.1	157020676	157023475	+	2800	protein_coding	pentatricopeptide repeat-containing protein At3g02490%2C mitochondrial-like	PPR
107858508	2416.86	1262.34	2280.3	983.117	895.578	863.465	1986.5	914.053	1.11968	0.000563772	0.0113518	LOC107858508	NC_029978.1	54946947	54954659	+	1477	protein_coding	pheophytinase%2C chloroplastic	-
107878867	21153.9	13697.3	19883.5	9089.85	5942.02	10146.5	18244.9	8392.81	1.12025	0.000564951	0.0113661	LOC107878867	NC_029983.1	220429735	220430440	+	706	protein_coding	photosystem I reaction center subunit V%2C chloroplastic	-
107854492	7.11678	121.379	35.268	7.57993	4.98005	5.85683	54.5879	6.13894	3.15385	0.000566779	0.0113843	LOC107854492	NW_015961180.1	798651	802792	+	1276	protein_coding	uncharacterized LOC107854492	Abhydrolase_1
107861934	7.11678	46.2396	26.451	3.03197	4.15004	3.34676	26.6025	3.50959	2.93241	0.000566796	0.0113843	LOC107861934	NC_029979.1	5811908	5812787	-	806	protein_coding	late embryogenesis abundant protein Dc3	-
107870535	38.4306	19.6518	50.6978	10.6119	8.30008	3.34676	36.2601	7.41958	2.2829	0.000567369	0.0113864	LOC107870535	NC_029981.1	33521837	33527162	-	1778	protein_coding	polygalacturonase At1g48100-like	-
107856061	196.423	143.343	164.217	302.439	318.723	298.699	167.994	306.62	-0.870731	0.000568921	0.0114081	LOC107856061	NW_015961541.1	22306	65225	-	2721	protein_coding	conserved oligomeric Golgi complex subunit 3-like	-
107853625	29.8905	50.8636	41.8808	5.30595	3.32003	15.8971	40.8783	8.17437	2.33018	0.000570387	0.011428	LOC107853625	NW_015960938.1	323	1447	+	1125	protein_coding	zinc finger protein ZAT5-like	-
107874987	58.3576	80.9193	73.8424	142.503	138.611	147.258	71.0398	142.79	-1.00227	0.000572543	0.0114516	LOC107874987	NC_029982.1	90795385	90797113	-	1729	protein_coding	serine/threonine-protein kinase BLUS1	Pkinase
107850981	3095.8	865.837	2889.77	781.49	692.226	718.717	2283.8	730.811	1.64374	0.000573094	0.0114516	LOC107850981	NC_029988.1	51261838	51266025	-	1491	protein_coding	F-box protein PP2-A12-like	F-box
107861235	277.554	1087.79	454.076	200.11	171.812	169.848	606.472	180.59	1.74817	0.000573549	0.0114516	LOC107861235	NC_029978.1	139266822	139268071	-	964	protein_coding	zinc finger protein CONSTANS-LIKE 2-like%2C transcript variant X1	zf-B_box
107850349	32.7372	131.783	95.8849	22.7398	7.47007	24.264	86.8017	18.158	2.25902	0.000574526	0.0114516	LOC107850349	NC_029988.1	4768366	4774487	-	2986	protein_coding	uncharacterized LOC107850349%2C transcript variant X2	-
107872961	160.839	451.992	210.506	98.539	62.2506	103.75	274.446	88.1798	1.63882	0.000574589	0.0114516	LOC107872961	NC_029982.1	45232463	45236023	+	1065	protein_coding	UPF0483 protein C25G4.2-like	-
107848024	288.941	2915.41	1312.63	351.709	213.312	325.473	1505.66	296.831	2.34282	0.000574706	0.0114516	LOC107848024	NC_029987.1	53159431	53164773	-	2838	protein_coding	protein SIEVE ELEMENT OCCLUSION B-like%2C transcript variant X2	-
107851205	46.9707	135.251	82.6594	24.2558	24.9002	32.6309	88.2937	27.2623	1.70019	0.000574873	0.0114516	LOC107851205	NC_029977.1	299231113	299236314	+	1431	protein_coding	L-lactate dehydrogenase B-like	-
107873383	414.196	504.012	218.221	902.769	904.708	880.199	378.81	895.892	-1.2425	0.000576209	0.0114688	LOC107873383	NC_029982.1	163055970	163058367	-	2398	protein_coding	pentatricopeptide repeat-containing protein At5g46580%2C chloroplastic	-
107849530	35.5839	17.3399	20.9404	68.2193	64.7406	67.7719	24.6214	66.9106	-1.45891	0.000577168	0.0114784	LOC107849530	NC_029988.1	227557409	227557900	+	492	protein_coding	pentatricopeptide repeat-containing protein At4g14820-like	PPR
107860777	11.3868	79.7633	44.085	8.33792	5.81005	8.36691	45.0784	7.50496	2.59115	0.000577712	0.011479	LOC107860777	NC_029978.1	163276294	163276743	+	450	protein_coding	uncharacterized LOC107860777	-
107845733	39.8539	16.1839	23.1446	75.0413	63.0806	112.953	26.3942	83.6917	-1.6781	0.000578142	0.011479	LOC107845733	NC_029986.1	33135231	33139633	+	781	lncRNA	uncharacterized LOC107845733	-
107871084	116.715	167.619	138.868	69.7353	67.2306	71.1187	141.067	69.3615	1.02657	0.000581544	0.0115371	LOC107871084	NC_029981.1	191214694	191217844	-	1092	protein_coding	uncharacterized LOC107871084%2C transcript variant X1	-
107860244	71.1678	367.605	218.221	60.6394	57.2705	53.5482	218.998	57.1527	1.9396	0.000584899	0.0115941	LOC107860244	NC_029978.1	154486049	154487712	+	837	protein_coding	ADP-ribosylation factor 2-B-like	Arf
107862340	950.801	1103.97	1023.87	439.636	637.446	309.576	1026.22	462.219	1.15082	0.000585537	0.0115973	LOC107862340	NC_029979.1	14506169	14511927	-	2254	protein_coding	ABC transporter B family member 25-like	ABC_membrane
107849647	52.6641	6.93594	40.7787	6.06394	2.49002	4.18345	33.4596	4.24581	2.96818	0.000590623	0.0116845	LOC107849647	NC_029988.1	11990398	11991695	-	760	protein_coding	salicylate carboxymethyltransferase-like	-
107859521	536.605	247.382	159.808	961.135	836.648	1045.03	314.598	947.603	-1.59288	0.000590904	0.0116845	LOC107859521	NC_029978.1	140048527	140052085	-	2600	protein_coding	G-type lectin S-receptor-like serine/threonine-protein kinase At1g11410	B_lectin
107843484	119.562	114.443	100.293	188.74	234.892	204.989	111.433	209.541	-0.912672	0.000593894	0.011734	LOC107843484	NC_029977.1	220611638	220613127	-	1490	protein_coding	G-type lectin S-receptor-like serine/threonine-protein kinase RLK1	B_lectin
107864661	91.0947	56.6435	79.3531	143.261	167.662	170.685	75.6971	160.536	-1.08835	0.000594494	0.0117363	LOC107864661	NC_029977.1	2806800	2810353	-	2964	protein_coding	BTB/POZ domain-containing protein At1g63850	-
novel.5007	28.4671	16.1839	23.1446	61.3974	51.4605	74.4655	22.5985	62.4411	-1.47525	0.000596527	0.0117668	-	NC_029986.1	160506085	160508631	+	2547	-	-	-
107854095	12.8102	69.3594	36.3702	8.33792	4.98005	7.53022	39.5133	6.94939	2.51128	0.000599007	0.0118061	LOC107854095	NW_015961071.1	61050	64256	-	3207	protein_coding	mucin-5AC-like	-
107873305	2562.04	2143.21	1952.97	4309.95	3526.7	3697.34	2219.4	3844.66	-0.792981	0.000606135	0.0119369	LOC107873305	NC_029982.1	130900346	130910840	+	1725	protein_coding	alpha-galactosidase 3%2C transcript variant X2	-
107852658	41.2773	43.9276	36.3702	17.4338	7.47007	10.877	40.525	11.927	1.75727	0.000608367	0.0119711	LOC107852658	NW_015960575.1	670909	673478	+	888	protein_coding	uncharacterized LOC107852658	-
novel.1240	42.7007	42.7716	42.9829	97.0231	78.8507	108.77	42.8184	94.8812	-1.14782	0.000610354	0.0120005	-	NC_029979.1	4851090	4854100	+	3011	-	-	-
107849310	9.96349	19.6518	33.0638	3.03197	1.66002	4.18345	20.893	2.95848	2.83038	0.000614764	0.0120746	LOC107849310	NC_029977.1	283184854	283186185	-	1332	protein_coding	acetylajmalan esterase-like	Lipase_GDSL
107874999	405.656	195.362	424.318	132.649	109.561	160.645	341.779	134.285	1.34737	0.000615121	0.0120746	LOC107874999	NC_029982.1	104753329	104754035	+	707	protein_coding	uncharacterized protein At4g14450%2C chloroplastic-like	-
107839595	436.97	382.633	1070.16	187.224	175.962	262.721	629.922	208.636	1.59491	0.000617911	0.0121196	LOC107839595	NC_029984.1	131669598	131670362	-	680	protein_coding	histone H2A.1	Histone
107859988	609.196	381.477	623.803	244.832	211.652	301.209	538.159	252.564	1.09115	0.000620148	0.0121536	LOC107859988	NC_029978.1	149672661	149676846	+	1339	protein_coding	putative glucose-6-phosphate 1-epimerase	Aldose_epim
107861248	535.182	3276.08	1460.32	466.166	373.503	486.954	1757.19	442.208	1.99066	0.00062138	0.0121679	LOC107861248	NC_029978.1	140279269	140279905	+	637	protein_coding	calcium-binding protein KIC-like	-
107867813	1251.13	1403.37	1315.94	717.819	878.978	591.54	1323.48	729.446	0.859576	0.000623343	0.0121941	LOC107867813	NC_029980.1	70846721	70850449	-	3413	protein_coding	leucine-rich repeat receptor-like tyrosine-protein kinase PXC3	Pkinase_Tyr
107840304	78.2845	86.6993	84.8637	34.1097	42.3304	39.3245	83.2825	38.5882	1.11252	0.000623725	0.0121941	LOC107840304	NC_029984.1	146282955	146284888	-	1445	protein_coding	probable carboxylesterase 13	Abhydrolase_3
107845508	58.3576	12.7159	15.4298	103.087	108.731	148.931	28.8344	120.25	-2.07763	0.000624667	0.012199	LOC107845508	NC_029986.1	33547128	33584310	-	1963	protein_coding	uncharacterized LOC107845508%2C transcript variant X2	-
107848203	236.277	327.145	221.527	132.649	137.781	131.36	261.65	133.93	0.966751	0.000624981	0.012199	LOC107848203	NC_029987.1	131065380	131069056	+	2000	protein_coding	uncharacterized LOC107848203	-
107872431	1688.1	1246.16	1019.47	2587.79	3195.53	2276.64	1317.91	2686.65	-1.02804	0.000628134	0.0122506	LOC107872431	NC_029977.1	44364670	44381862	+	2870	protein_coding	UTP:RNA uridylyltransferase 1%2C transcript variant X3	NTP_transf_2
107861806	357.262	263.566	234.753	575.316	556.935	495.321	285.194	542.524	-0.930196	0.000630211	0.0122813	LOC107861806	NC_029979.1	3927772	3931726	+	1446	protein_coding	nuclear pore complex protein NUP35	-
107866104	25.6204	18.4958	31.9616	5.30595	4.98005	7.53022	25.3593	5.93874	2.09772	0.000630907	0.0122849	LOC107866104	NC_029979.1	38075089	38076350	+	1262	pseudogene	-	Oxidored_FMN
107875263	118.138	168.775	156.502	57.6074	73.0407	78.6489	147.805	69.7657	1.08691	0.000633658	0.0123208	LOC107875263	NC_029982.1	931996	935960	-	1290	protein_coding	fatty-acid-binding protein 1	-
107869223	58.3576	61.2675	198.383	29.5617	23.2402	28.4475	106.003	27.0831	1.97145	0.000633764	0.0123208	LOC107869223	NC_029980.1	209986068	209989919	-	2754	protein_coding	probable LRR receptor-like serine/threonine-protein kinase At3g47570	LRRNT_2
107839742	250.511	217.326	177.442	406.284	391.764	373.164	215.093	390.404	-0.862589	0.000634825	0.0123315	LOC107839742	NC_029984.1	134409027	134412597	-	2024	protein_coding	myosin-11-like	-
novel.2002	8.54013	4.62396	5.51063	28.0457	24.0702	26.7741	6.22491	26.2967	-2.10143	0.000637471	0.012373	-	NC_029980.1	7054389	7088529	+	937	-	-	-
107867606	193.576	121.379	90.3743	299.407	323.703	312.086	135.11	311.732	-1.21118	0.000638627	0.0123803	LOC107867606	NC_029980.1	37847210	37849764	-	2555	protein_coding	protein FRIGIDA-like	-
107878132	1054.71	413.845	573.105	254.686	230.742	297.025	680.552	260.818	1.38277	0.00063905	0.0123803	LOC107878132	NC_029983.1	166374600	166381502	-	2979	protein_coding	uncharacterized LOC107878132%2C transcript variant X1	-
107867800	9.96349	146.811	34.1659	7.57993	9.13008	6.69352	63.6467	7.80118	3.03129	0.00063938	0.0123803	LOC107867800	NC_029980.1	66909146	66911283	-	2138	protein_coding	probable receptor-like protein kinase At1g11050	Pkinase
107858457	207.81	504.012	85.9658	930.057	1415.16	876.852	265.929	1074.02	-2.01374	0.000644019	0.0124601	LOC107858457	NC_029978.1	42865893	42868883	+	1616	protein_coding	uncharacterized LOC107858457	DnaJ
107859186	15.6569	15.0279	26.451	56.8495	45.6504	68.6086	19.0453	57.0362	-1.5728	0.000646482	0.0124978	LOC107859186	NC_029978.1	129727397	129728626	+	748	protein_coding	uncharacterized LOC107859186	-
107847415	22402.2	18276.2	18064.9	11763.3	12491.6	11875.1	19581.1	12043.4	0.701193	0.000647364	0.0125049	LOC107847415	NC_029987.1	213899245	213903897	-	1657	protein_coding	S-adenosylmethionine decarboxylase proenzyme	SAM_decarbox
107861060	14.2336	58.9555	28.6553	6.82193	7.47007	2.51007	33.9481	5.60069	2.60172	0.000648766	0.012522	LOC107861060	NC_029978.1	109047511	109048090	-	580	protein_coding	uncharacterized LOC107861060	-
107877723	2695.83	2905	3351.56	1672.89	1592.78	1987.98	2984.13	1751.22	0.769128	0.000651925	0.0125729	LOC107877723	NC_029983.1	20628563	20633558	+	2060	protein_coding	monogalactosyldiacylglycerol synthase 2%2C chloroplastic-like%2C transcript variant X3	-
107838933	550.839	1731.67	1455.91	435.846	400.894	478.587	1246.14	438.442	1.50745	0.000653941	0.0125922	LOC107838933	NC_029977.1	167038941	167039815	-	550	protein_coding	histone H4	-
107843458	31.3138	24.2758	25.3489	66.7034	65.5706	61.0784	26.9795	64.4508	-1.26353	0.000654114	0.0125922	LOC107843458	NC_029986.1	172084751	172086845	-	1802	protein_coding	uncharacterized LOC107843458	-
107839916	51.2408	31.2117	26.451	85.6532	83.0008	112.953	36.3012	93.8691	-1.38276	0.000654483	0.0125922	LOC107839916	NC_029977.1	173962596	173965534	-	2055	protein_coding	histone-lysine N-methyltransferase SUVR3	SET
107840864	301.751	278.594	192.872	468.439	499.665	511.218	257.739	493.107	-0.937884	0.000657087	0.0126322	LOC107840864	NC_029985.1	5055819	5058383	+	1781	pseudogene	-	-
107857244	48.3941	4.62396	22.0425	133.407	87.1508	156.461	25.0202	125.673	-2.34215	0.00065874	0.012654	LOC107857244	NC_029977.1	232292108	232293272	-	1165	protein_coding	transcription repressor OFP15	-
107875670	19.927	83.2313	62.8212	10.6119	14.1101	14.2237	55.3265	12.9819	2.09924	0.000661064	0.0126886	LOC107875670	NC_029982.1	9585976	9595151	+	1574	protein_coding	NAC domain-containing protein 40-like	NAM
107858823	8.54013	36.9917	39.6765	5.30595	4.98005	3.34676	28.4028	4.54425	2.65037	0.000661914	0.0126948	LOC107858823	NC_029978.1	106659402	106661559	-	1709	protein_coding	U-box domain-containing protein 7	Arm
107875414	431.277	284.374	348.272	629.134	693.886	641.742	354.641	654.921	-0.886506	0.000664098	0.0127244	LOC107875414	NC_029982.1	3622861	3630297	+	3287	protein_coding	uncharacterized LOC107875414	-
107845470	88.248	10.4039	216.017	9.8539	9.13008	20.0806	104.89	13.0215	3.01207	0.000664508	0.0127244	LOC107845470	NC_029986.1	1546521	1554249	-	1770	protein_coding	protein DETOXIFICATION 18-like	MatE
107860825	21.3503	168.775	91.4764	21.9818	10.7901	19.2439	93.8671	17.3386	2.43825	0.000667645	0.012773	LOC107860825	NC_029978.1	2382281	2388713	+	1595	protein_coding	UPF0481 protein At3g47200-like%2C transcript variant X1	-
107871692	210.657	231.198	257.897	141.745	121.181	121.32	233.251	128.082	0.865573	0.000668099	0.012773	LOC107871692	NC_029977.1	37185206	37199317	+	2040	protein_coding	RNA-binding KH domain-containing protein PEPPER-like%2C transcript variant X2	KH_1
107861501	37.0072	139.875	144.378	28.8037	29.0503	29.2842	107.087	29.0461	1.88645	0.000670361	0.0128061	LOC107861501	NC_029978.1	163287312	163288370	-	1059	protein_coding	uncharacterized LOC107861501	-
107860269	656.167	878.553	1063.55	419.928	479.744	454.323	866.09	451.332	0.941202	0.000672763	0.0128407	LOC107860269	NC_029978.1	154860253	154867115	+	4066	protein_coding	filament-like plant protein 7%2C transcript variant X4	-
107869416	95.3648	766.422	406.684	115.215	66.4006	91.1993	422.824	90.9383	2.21753	0.000673229	0.0128407	LOC107869416	NC_029980.1	5499181	5502658	+	1259	protein_coding	agglutinin-like%2C transcript variant X1	-
novel.6084	14.2336	98.2592	30.8595	9.8539	7.47007	3.34676	47.7841	6.89025	2.79319	0.000674026	0.0128457	-	NC_029988.1	228537965	228538910	+	755	-	-	-
107871487	690.327	1006.87	933.501	431.298	280.543	501.178	876.898	404.339	1.11722	0.000674788	0.0128502	LOC107871487	NC_029981.1	217184971	217189273	+	2605	protein_coding	phenylalanine ammonia-lyase-like	-
107840961	133.795	82.0753	123.438	233.462	212.482	250.17	113.103	232.038	-1.03931	0.000675463	0.0128529	LOC107840961	NC_029985.1	7016388	7019511	-	1312	protein_coding	GATA transcription factor 21-like	GATA
107870596	120.985	106.351	188.464	62.1554	56.4405	61.9151	138.6	60.1703	1.2057	0.000680945	0.012947	LOC107870596	NC_029981.1	49487101	49492876	+	1112	protein_coding	spindle and kinetochore-associated protein 1 homolog%2C transcript variant X1	-
107859807	58.3576	67.0474	51.7999	130.375	137.781	104.586	59.0683	124.247	-1.07342	0.000681747	0.0129521	LOC107859807	NC_029978.1	145638951	145640804	+	1854	protein_coding	pentatricopeptide repeat-containing protein At2g17670	-
107863180	7.11678	8.09193	15.4298	40.9316	29.0503	46.018	10.2128	38.6666	-1.90296	0.00068305	0.0129667	LOC107863180	NC_029979.1	46110189	46125985	+	2423	lncRNA	uncharacterized LOC107863180	-
107846938	12.8102	46.2396	19.8383	2.27398	1.66002	6.69352	26.296	3.54251	2.90416	0.000684202	0.0129784	LOC107846938	NC_029987.1	200022814	200024346	-	1533	protein_coding	uncharacterized LOC107846938	-
107860510	5089.92	1795.25	5328.78	1490.21	1533.02	1367.15	4071.32	1463.46	1.47606	0.000686337	0.0130087	LOC107860510	NC_029978.1	159415639	159420343	+	3101	protein_coding	phosphate transporter PHO1 homolog 9-like	SPX
107867519	82.5546	85.5433	106.906	43.9636	44.8204	39.3245	91.668	42.7028	1.10422	0.000686966	0.0130105	LOC107867519	NC_029977.1	9982541	9983068	+	528	protein_coding	uncharacterized LOC107867519	-
107843969	153.722	143.343	181.851	283.489	293.823	274.435	159.639	283.915	-0.829503	0.000688404	0.0130179	LOC107843969	NC_029986.1	203890552	203902669	-	4069	protein_coding	DNA-directed RNA polymerase III subunit 2%2C transcript variant X2	RNA_pol_Rpb2_5
107862077	12.8102	16.1839	8.81701	1.51599	0.830008	0.836691	12.6037	1.06089	3.55558	0.000688645	0.0130179	LOC107862077	NC_029979.1	8032658	8034990	-	2167	protein_coding	probable E3 ubiquitin-protein ligase rbrA	IBR
107873875	14.2336	3.46797	3.30638	28.0457	46.4804	32.6309	7.00263	35.719	-2.39848	0.000689506	0.0130179	LOC107873875	NC_029982.1	12172301	12175490	+	1614	pseudogene	-	-
107842775	243.394	646.199	483.833	200.868	170.982	149.768	457.809	173.872	1.39755	0.000689507	0.0130179	LOC107842775	NC_029985.1	182279987	182281659	-	1673	protein_coding	BAHD acyltransferase DCR	-
107863408	120.985	190.738	246.876	60.6394	52.2905	96.2194	186.2	69.7164	1.42023	0.000690798	0.0130321	LOC107863408	NC_029979.1	77660907	77665898	-	2759	protein_coding	protein NSP-INTERACTING KINASE 2%2C transcript variant X3	Pkinase_Tyr
107845710	118.138	182.646	210.506	78.8312	70.5506	81.9957	170.43	77.1259	1.14709	0.000691702	0.013039	LOC107845710	NC_029986.1	109693512	109749599	+	2179	protein_coding	bifunctional 3-dehydroquinate dehydratase/shikimate dehydrogenase%2C chloroplastic-like	-
107859873	18.5036	60.1115	34.1659	4.54796	8.30008	10.877	37.5937	7.90834	2.26055	0.000693242	0.0130579	LOC107859873	NC_029978.1	147514510	147517567	-	1823	protein_coding	thaumatin-like protein 1b	Thaumatin
107872935	1039.05	225.418	894.926	189.498	134.461	253.517	719.798	192.492	1.90251	0.000694116	0.0130642	LOC107872935	NC_029982.1	41279729	41282701	-	1447	protein_coding	homeobox-leucine zipper protein HAT4	Homeobox
novel.6932	37.0072	63.5795	66.1275	23.4978	16.6002	17.5705	55.5714	19.2228	1.53501	0.000701279	0.0131887	-	NW_015961344.1	576418	583134	-	5851	-	PF03081:Exo70 exocyst complex subunit|PF03040:CemA family	Exo70
107862576	175.073	78.6073	160.91	37.1416	22.4102	63.5885	138.197	41.0468	1.75085	0.000705582	0.0132594	LOC107862576	NC_029979.1	20420288	20422122	+	1451	protein_coding	transcription repressor MYB6-like	Myb_DNA-binding
107875017	125.255	271.658	195.076	64.4294	71.3806	97.0561	197.33	77.622	1.3489	0.000707021	0.0132734	LOC107875017	NC_029982.1	123601599	123603868	+	1681	protein_coding	putative two-component response regulator ARR13%2C transcript variant X1	Myb_DNA-binding
107840761	4.27007	1.15599	0	15.9178	18.2602	19.2439	1.80869	17.8073	-3.4095	0.000707796	0.0132734	LOC107840761	NC_029985.1	492355	495125	-	1268	lncRNA	uncharacterized LOC107840761	NB-ARC
107855168	51.2408	55.4875	49.5957	17.4338	17.4302	25.1007	52.108	19.9882	1.38454	0.000707975	0.0132734	LOC107855168	NW_015961344.1	3685293	3690603	-	1454	protein_coding	uncharacterized LOC107855168%2C transcript variant X1	-
novel.3214	32.7372	21.9638	13.2255	68.9773	51.4605	97.0561	22.6422	72.498	-1.69355	0.000710469	0.0133088	-	NC_029982.1	185757326	185759180	+	1719	-	-	-
107859154	42.7007	269.346	176.34	46.9955	29.8803	35.141	162.796	37.3389	2.1256	0.000711313	0.0133088	LOC107859154	NC_029978.1	128274642	128275970	+	808	protein_coding	uncharacterized LOC107859154	-
107875542	1762.11	427.716	2068.69	401.736	341.963	450.14	1419.51	397.946	1.83468	0.000711507	0.0133088	LOC107875542	NC_029982.1	6318625	6325840	+	2930	protein_coding	U-box domain-containing protein 13-like	Arm
107873738	24.197	95.9472	45.1872	13.6439	14.9401	10.0403	55.1105	12.8748	2.10173	0.000714874	0.0133614	LOC107873738	NC_029982.1	218941678	218951557	-	2389	lncRNA	uncharacterized LOC107873738%2C transcript variant X2	-
107870028	1021.97	1177.95	1000.73	674.613	638.276	677.719	1066.88	663.536	0.68525	0.000718305	0.0134152	LOC107870028	NC_029981.1	915515	926972	+	3771	protein_coding	putative calcium-transporting ATPase 11%2C plasma membrane-type%2C transcript variant X2	Hydrolase
107852790	273.284	126.003	143.276	416.138	439.904	430.059	180.855	428.7	-1.24901	0.000719377	0.0134249	LOC107852790	NW_015960638.1	15613	19055	-	2571	protein_coding	uncharacterized LOC107852790%2C transcript variant X3	-
107840845	4264.37	905.14	2355.24	727.673	558.595	873.505	2508.25	719.924	1.80059	0.000721338	0.0134511	LOC107840845	NC_029985.1	4853779	4855531	+	1753	protein_coding	UDP-glucuronate 4-epimerase 1	-
107872950	14.2336	18.4958	41.8808	4.54796	4.98005	4.18345	24.8701	4.57048	2.45307	0.000722565	0.0134596	LOC107872950	NC_029982.1	43888143	43894715	-	2001	pseudogene	-	-
107860181	370.072	323.677	305.289	519.225	581.835	575.643	333.013	558.901	-0.748232	0.000723359	0.0134596	LOC107860181	NC_029978.1	153385292	153390270	-	2843	protein_coding	pentatricopeptide repeat-containing protein At5g67570%2C chloroplastic	PPR
107859976	41.2773	33.5237	57.3105	104.603	104.581	94.546	44.0372	101.243	-1.1976	0.000723462	0.0134596	LOC107859976	NC_029978.1	149369254	149373532	+	2121	protein_coding	probable DNA-3-methyladenine glycosylase 2%2C transcript variant X2	HhH-GPD
107876066	44.124	52.0196	80.4552	15.1599	19.9202	25.1007	58.8663	20.0603	1.56082	0.000725821	0.0134931	LOC107876066	NC_029982.1	22390442	22393893	-	1778	lncRNA	uncharacterized LOC107876066	-
107861956	700.291	825.377	511.386	1341.65	1576.18	1137.06	679.018	1351.63	-0.993428	0.000729235	0.0135367	LOC107861956	NC_029979.1	6137873	6141260	+	1230	protein_coding	uncharacterized LOC107861956	-
107870021	76.8612	58.9555	63.9233	147.051	128.651	123.83	66.58	133.177	-1.00509	0.000729458	0.0135367	LOC107870021	NC_029981.1	890563	892273	+	1711	pseudogene	-	-
107876824	17.0803	50.8636	28.6553	2.27398	9.96009	4.18345	32.1997	5.47251	2.56932	0.000729841	0.0135367	LOC107876824	NC_029983.1	206534187	206534978	+	792	protein_coding	uncharacterized LOC107876824	-
107839065	250.511	1051.95	347.17	118.247	197.542	121.32	549.877	145.703	1.91673	0.000732046	0.0135672	LOC107839065	NC_029984.1	102465963	102467850	-	1888	protein_coding	3-ketoacyl-CoA synthase 11-like	-
107840464	209.233	408.065	319.616	145.535	137.781	146.421	312.305	143.246	1.12615	0.000733645	0.0135865	LOC107840464	NC_029984.1	149711762	149712650	-	889	protein_coding	nucleolin-like	-
107863632	149.452	138.719	131.153	22.7398	13.2801	68.6086	139.775	34.8762	2.00415	0.000734387	0.0135898	LOC107863632	NC_029977.1	689554	692032	-	1845	protein_coding	endoglucanase CX-like	-
107875558	2606.16	1508.57	2194.33	911.107	605.076	1178.9	2103.02	898.36	1.22695	0.000742357	0.0137268	LOC107875558	NC_029982.1	6793574	6797184	+	1879	protein_coding	licodione synthase-like	p450
107843729	2593.35	966.408	3275.52	587.444	552.785	1013.23	2278.43	717.821	1.66638	0.00074662	0.0137951	LOC107843729	NC_029986.1	197631190	197636895	-	1196	protein_coding	2-Cys peroxiredoxin BAS1%2C chloroplastic-like	-
107864054	1012.01	685.502	653.561	1528.11	2091.62	1327.83	783.689	1649.19	-1.07411	0.0007509	0.0138636	LOC107864054	NC_029979.1	233179747	233189074	-	2983	protein_coding	sucrose synthase 2	Glycos_transf_1
107864335	300.328	265.878	281.042	440.394	514.605	461.853	282.416	472.284	-0.742489	0.000753072	0.0138931	LOC107864335	NC_029979.1	245824422	245847696	+	8596	protein_coding	small subunit processome component 20 homolog%2C transcript variant X1	-
107839838	133.795	156.059	102.498	253.928	263.112	239.294	130.784	252.111	-0.948006	0.000754974	0.0139176	LOC107839838	NC_029984.1	136513703	136522827	-	3518	protein_coding	pentatricopeptide repeat-containing protein At1g10270	PPR
novel.7052	189.306	58.9555	163.115	42.4476	30.7103	51.0381	137.125	41.3987	1.72608	0.000755906	0.0139242	-	NW_015961502.1	22158	23994	+	1837	-	-	-
novel.6507	106.752	54.3315	103.6	184.95	219.952	203.316	88.2277	202.739	-1.20273	0.000758318	0.013958	-	NW_015960575.1	409354	411682	-	1936	-	-	-
107848639	25.6204	79.7633	17.634	168.274	195.882	119.647	41.0059	161.268	-1.97256	0.000760268	0.0139833	LOC107848639	NC_029987.1	139948731	139951886	-	1780	protein_coding	cytochrome P450 76A2-like	p450
novel.5053	630.546	310.961	471.71	180.402	162.681	252.681	471.073	198.588	1.24543	0.00076104	0.0139868	-	NC_029986.1	187381459	187392803	+	980	-	-	-
107845449	79.7079	100.571	109.11	169.032	216.632	185.745	96.4632	190.47	-0.977122	0.000762515	0.0139961	LOC107845449	NC_029986.1	7071567	7107076	+	4281	protein_coding	RAF proto-oncogene serine/threonine-protein kinase%2C transcript variant X6	Pkinase_Tyr
107854919	579.306	1242.69	1099.92	398.704	253.152	481.097	973.972	377.651	1.36728	0.000762696	0.0139961	LOC107854919	NW_015961290.1	329948	333550	-	2424	protein_coding	protein IQ-DOMAIN 14	IQ
107871405	244.817	438.12	1062.45	140.987	149.401	206.663	581.796	165.684	1.81304	0.000765133	0.0140194	LOC107871405	NC_029977.1	35557205	35559132	-	1928	protein_coding	catechol oxidase B%2C chloroplastic	-
107839264	24.197	25.4318	23.1446	54.5755	59.7605	61.9151	24.2578	58.7504	-1.27594	0.000765571	0.0140194	LOC107839264	NC_029984.1	123561694	123564541	+	2848	protein_coding	pentatricopeptide repeat-containing protein At5g28460	PPR
107860972	56.9342	664.694	167.523	53.0595	49.8005	53.5482	296.384	52.136	2.50788	0.000765706	0.0140194	LOC107860972	NC_029978.1	83798047	83799121	-	1075	protein_coding	calmodulin-like protein 1	-
107857391	180.766	591.867	319.616	139.471	116.201	116.3	364.083	123.991	1.55491	0.000768011	0.014051	LOC107857391	NC_029977.1	295934190	295935358	+	384	lncRNA	uncharacterized LOC107857391	-
107868248	240.547	159.527	185.157	363.836	343.623	396.591	195.077	368.017	-0.918547	0.000771463	0.0141006	LOC107868248	NC_029980.1	201935229	201938923	+	1058	protein_coding	RING-H2 finger protein ATL80-like%2C transcript variant X3	-
107861122	22.7737	143.343	115.723	18.1918	17.4302	25.1007	93.9466	20.2409	2.21885	0.000771884	0.0141006	LOC107861122	NC_029978.1	125133325	125136007	+	631	protein_coding	uncharacterized LOC107861122	-
107843253	513.831	307.493	344.965	758.751	782.697	741.308	388.763	760.919	-0.970708	0.000774517	0.014138	LOC107843253	NC_029985.1	238575109	238581068	-	2575	protein_coding	rho GTPase-activating protein 1-like	PBD
107873267	81.1313	53.1756	50.6978	133.407	125.331	137.217	61.6682	131.985	-1.10634	0.000777409	0.0141801	LOC107873267	NC_029982.1	115915839	115919895	+	1221	lncRNA	uncharacterized LOC107873267%2C transcript variant X2	-
107871194	792.809	321.365	674.501	214.512	250.662	254.354	596.225	239.843	1.31332	0.000782109	0.0142484	LOC107871194	NC_029981.1	201924546	201934036	-	2178	protein_coding	ultraviolet-B receptor UVR8%2C transcript variant X2	-
107857337	15.6569	2.31198	11.0213	38.6576	36.5203	55.2216	9.66338	43.4665	-2.19024	0.000782329	0.0142484	LOC107857337	NC_029977.1	284477233	284479458	-	2107	protein_coding	G-type lectin S-receptor-like serine/threonine-protein kinase SD2-5	B_lectin
107856299	48.3941	24.2758	55.1063	12.8859	9.13008	14.2237	42.5921	12.0799	1.81618	0.000789462	0.0143675	LOC107856299	NC_029977.1	168118040	168121940	-	1414	protein_coding	zinc finger protein WIP2-like	-
107856789	1589.89	1772.13	2005.87	1031.63	1183.59	969.724	1789.3	1061.65	0.753374	0.000791195	0.0143882	LOC107856789	NW_015961757.1	851004	866030	-	2500	protein_coding	diacylglycerol kinase 5%2C transcript variant X3	-
107877615	2470.94	2144.36	1488.97	3865.76	4187.39	3607.81	2034.76	3886.99	-0.934097	0.000793115	0.0144123	LOC107877615	NC_029977.1	111529044	111539267	+	1571	protein_coding	uncharacterized LOC107877615	-
107843769	93.9415	378.009	182.953	60.6394	61.4206	72.7921	218.301	64.9507	1.75074	0.00079681	0.0144686	LOC107843769	NC_029986.1	199603202	199606607	+	1985	protein_coding	probable auxin efflux carrier component 1b	-
novel.1104	38.4306	95.9472	58.4127	22.7398	19.0902	20.9173	64.2635	20.9157	1.62333	0.000801206	0.0145375	-	NC_029978.1	121161591	121165700	-	1367	-	-	-
107861356	22.7737	228.886	51.7999	11.3699	12.4501	22.5906	101.153	15.4702	2.71227	0.00080197	0.0145405	LOC107861356	NC_029978.1	151928513	151930147	+	1217	protein_coding	uncharacterized protein At4g22758-like	-
107840801	66.8977	205.766	137.766	46.2376	30.7103	52.7115	136.81	43.2198	1.66495	0.000805446	0.014588	LOC107840801	NC_029977.1	182182731	182185886	-	1801	protein_coding	protein trichome birefringence-like 6	-
107871182	1263.94	1236.91	984.198	1869.21	1992.02	1905.98	1161.68	1922.4	-0.727065	0.000806441	0.014588	LOC107871182	NC_029981.1	201323496	201329702	+	4332	protein_coding	FACT complex subunit SPT16-like%2C transcript variant X5	Peptidase_M24
107838865	491.058	426.56	330.638	781.49	737.047	726.247	416.085	748.262	-0.848162	0.000806546	0.014588	LOC107838865	NC_029984.1	26642285	26644023	-	1739	protein_coding	zinc finger CCCH domain-containing protein 20-like	zf-CCCH
107877796	1602.7	794.165	1404.11	530.595	658.196	353.083	1266.99	513.958	1.30142	0.000807952	0.014588	LOC107877796	NC_029983.1	40312517	40318675	-	2777	protein_coding	cyclic nucleotide-gated ion channel 1	Ion_trans
107869395	11.3868	56.6435	42.9829	7.57993	1.66002	7.53022	37.0044	5.59005	2.72885	0.000808197	0.014588	LOC107869395	NC_029980.1	2864165	2866804	-	953	protein_coding	WEB family protein At1g75720	-
107871355	38.4306	439.276	77.1488	36.3836	21.5802	27.6108	184.952	28.5249	2.69717	0.000808203	0.014588	LOC107871355	NC_029981.1	214985816	214989410	-	1823	protein_coding	protein LIGHT-DEPENDENT SHORT HYPOCOTYLS 2	-
107864467	1503.06	1017.27	677.807	2206.52	2505.79	2460.71	1066.05	2391.01	-1.166	0.000809596	0.0146023	LOC107864467	NC_029979.1	249853064	249867014	-	4130	protein_coding	phosphoglucan%2C water dikinase%2C chloroplastic	-
107843467	1007.74	245.07	591.842	204.658	183.432	193.276	614.882	193.788	1.66501	0.000810566	0.0146089	LOC107843467	NC_029986.1	173625289	173627584	+	2296	protein_coding	L-type lectin-domain containing receptor kinase S.4-like	Pkinase
107859875	2.84671	3.46797	5.51063	15.9178	23.2402	26.7741	3.94177	21.9774	-2.45595	0.000811356	0.0146123	LOC107859875	NC_029978.1	147497529	147501414	+	902	lncRNA	uncharacterized LOC107859875	-
107845887	28.4671	35.8357	65.0254	0.757993	3.32003	13.387	43.1094	5.82169	2.90121	0.000817611	0.014714	LOC107845887	NC_029986.1	10078179	10079843	+	508	lncRNA	uncharacterized LOC107845887	-
107857147	108.175	52.0196	121.234	34.1097	37.3503	28.4475	93.8095	33.3025	1.49292	0.000819259	0.0147327	LOC107857147	NC_029977.1	211782970	211788014	-	958	protein_coding	nucleolar protein 58	-
107861959	3145.62	309.805	2279.2	356.257	138.611	519.585	1911.54	338.151	2.49889	0.00082215	0.0147706	LOC107861959	NC_029979.1	6201072	6204140	-	1562	protein_coding	palmitoyl-monogalactosyldiacylglycerol delta-7 desaturase%2C chloroplastic	-
novel.2989	51.2408	953.692	154.298	58.3654	42.3304	61.0784	386.41	53.9247	2.84151	0.000822586	0.0147706	-	NC_029982.1	3264298	3265378	+	1002	-	-	-
107872529	337.335	49.7076	176.34	46.9955	31.5403	49.3647	187.794	42.6335	2.13693	0.000823357	0.0147735	LOC107872529	NC_029981.1	157030611	157031754	-	1144	protein_coding	ethylene-responsive transcription factor ERF038-like%2C transcript variant X2	AP2
107840063	138.065	116.755	146.583	231.188	237.382	246.824	133.801	238.465	-0.833798	0.000824082	0.0147755	LOC107840063	NC_029984.1	140542017	140548679	-	2609	lncRNA	uncharacterized LOC107840063%2C transcript variant X2	-
107874728	22.7737	49.7076	72.7403	16.6758	10.7901	8.36691	48.4072	11.9443	2.02139	0.000826723	0.0148119	LOC107874728	NC_029982.1	16787963	16789811	-	1349	protein_coding	dof zinc finger protein DOF5.6-like	zf-Dof
107878719	214.927	106.351	240.263	71.2513	46.4804	85.3424	187.18	67.6914	1.46683	0.000829401	0.0148467	LOC107878719	NC_029983.1	217278361	217281785	-	994	protein_coding	uncharacterized LOC107878719	-
107867305	246.24	211.546	369.212	127.343	85.4908	142.237	275.666	118.357	1.22046	0.000829893	0.0148467	LOC107867305	NC_029980.1	13973933	13974571	+	639	protein_coding	50S ribosomal protein 6%2C chloroplastic	-
107839483	5549.66	2509.65	4710.49	1845.71	1505.63	2116.83	4256.6	1822.72	1.22352	0.000830691	0.0148501	LOC107839483	NC_029977.1	169732046	169742979	+	1476	protein_coding	cycloartenol-C-24-methyltransferase 1-like	Methyltransf_11
107862608	296.058	1324.76	1072.37	325.937	202.522	249.334	897.73	259.264	1.79218	0.000833719	0.0148827	LOC107862608	NC_029979.1	21597494	21601061	-	2480	protein_coding	protein SIEVE ELEMENT OCCLUSION B-like	-
107839836	233.43	158.371	308.595	90.9591	117.861	100.403	233.465	103.074	1.18036	0.000833747	0.0148827	LOC107839836	NC_029984.1	136411830	136419592	-	2822	protein_coding	chloride channel protein CLC-c-like	CBS
107856978	199.27	193.05	239.161	117.489	98.7709	122.994	210.494	113.084	0.897155	0.0008348	0.0148905	LOC107856978	NW_015961815.1	1246872	1257914	+	2212	protein_coding	synaptotagmin-5-like	C2
107855214	1423.36	1221.88	2311.16	804.23	584.325	840.037	1652.13	742.864	1.15332	0.000836947	0.0149179	LOC107855214	NW_015961361.1	4314	6769	+	1816	protein_coding	pro-resilin-like	HMA
107871128	350.145	258.942	458.484	722.367	626.656	950.481	355.857	766.501	-1.10661	0.000840278	0.0149662	LOC107871128	NC_029977.1	31709028	31712658	-	3140	lncRNA	uncharacterized LOC107871128%2C transcript variant X2	-
107840202	193.576	255.474	348.272	112.941	107.071	144.747	265.774	121.586	1.13049	0.000841555	0.014978	LOC107840202	NC_029984.1	143786863	143789703	+	924	protein_coding	classical arabinogalactan protein 9	-
107847589	1144.38	1080.85	918.071	1644.84	1765.43	1675.89	1047.77	1695.39	-0.694734	0.00084242	0.0149823	LOC107847589	NC_029987.1	196969373	196975034	-	2817	protein_coding	KH domain-containing protein At4g18375%2C transcript variant X2	KH_1
107866989	28.4671	241.602	115.723	34.1097	17.4302	23.4273	128.597	24.9891	2.36427	0.000844621	0.0149941	LOC107866989	NC_029980.1	5323865	5326328	-	2246	protein_coding	proteoglycan 4-like%2C transcript variant X1	-
107864683	1345.07	20353.5	3598.44	1468.23	879.808	1611.47	8432.34	1319.84	2.67559	0.000844917	0.0149941	LOC107864683	NC_029979.1	261377929	261382556	-	1834	protein_coding	aspartic proteinase-like	Asp
107856078	12.8102	25.4318	18.7361	3.78996	4.15004	2.51007	18.9927	3.48336	2.45144	0.000844939	0.0149941	LOC107856078	NW_015961555.1	78992	80559	-	1568	protein_coding	basic 7S globulin-like	-
107841855	61.2043	321.365	276.634	71.2513	40.6704	52.7115	219.734	54.8777	2.00251	0.000846922	0.0150183	LOC107841855	NC_029977.1	202632764	202634086	+	950	protein_coding	uncharacterized LOC107841855	-
107866679	283.248	784.917	595.148	194.046	212.482	233.437	554.438	213.322	1.37908	0.000848137	0.0150288	LOC107866679	NC_029977.1	7518921	7523844	-	863	protein_coding	ATP-dependent Clp protease ATP-binding subunit CLPT2%2C chloroplastic-like	Clp_N
107879897	122.409	180.334	91.4764	295.617	268.922	295.352	131.406	286.63	-1.12514	0.000850525	0.0150601	LOC107879897	NC_029984.1	140386348	140392190	-	1956	protein_coding	ABC transporter G family member 11-like	ABC2_membrane
107876032	18.5036	2.31198	17.634	50.7855	53.9505	65.2619	12.8165	56.666	-2.15464	0.000851951	0.0150744	LOC107876032	NC_029977.1	75898503	75901845	+	3026	lncRNA	uncharacterized LOC107876032	-
107871732	535.182	998.776	458.484	250.138	205.012	335.513	664.147	263.554	1.33371	0.000854366	0.0151042	LOC107871732	NC_029977.1	38153730	38160221	-	2162	protein_coding	cryptochrome DASH%2C chloroplastic/mitochondrial%2C transcript variant X2	-
107861960	454.05	945.6	578.616	294.859	183.432	317.942	659.422	265.411	1.31337	0.000854882	0.0151042	LOC107861960	NC_029979.1	6209699	6215074	-	1310	protein_coding	phosphatidylcholine:diacylglycerol cholinephosphotransferase 1-like	-
107849571	210.657	248.538	185.157	109.151	112.881	124.667	214.784	115.566	0.894416	0.000857099	0.0151323	LOC107849571	NC_029988.1	191194016	191195108	+	1093	protein_coding	protein MKS1-like	-
107859000	639.087	773.357	849.739	423.718	473.104	346.39	754.061	414.404	0.864205	0.00085913	0.0151512	LOC107859000	NC_029978.1	120430130	120435917	-	1901	protein_coding	UDP-arabinose 4-epimerase 1-like	-
107855885	259.051	998.776	572.003	186.466	117.861	240.13	609.943	181.486	1.74942	0.000859418	0.0151512	LOC107855885	NW_015961487.1	2536420	2544420	+	2537	protein_coding	V-type proton ATPase catalytic subunit A	ATP-synt_ab
novel.210	5.69342	10.4039	13.2255	0	0.830008	0	9.77428	0.276669	5.08696	0.0008619	0.0151838	-	NC_029977.1	165657980	165663150	+	1248	-	-	-
107868118	165.109	178.022	110.213	61.3974	73.8707	75.3022	151.115	70.1901	1.1055	0.000862673	0.0151864	LOC107868118	NC_029980.1	183800723	183804184	+	2836	protein_coding	uncharacterized LOC107868118%2C transcript variant X3	-
107870208	3918.5	3622.87	3240.25	2374.79	2263.43	2191.29	3593.87	2276.5	0.658554	0.000863535	0.0151906	LOC107870208	NC_029981.1	7588063	7592263	-	1489	protein_coding	actin-97	Actin
novel.7206	274.708	252.006	259	130.375	95.4509	163.155	261.904	129.66	1.014	0.000869591	0.015286	-	NW_015961752.1	22231	23285	-	1055	-	-	-
107857582	19.927	21.9638	9.91913	55.3335	69.7206	40.1611	17.27	55.0717	-1.68161	0.000879203	0.0154433	LOC107857582	NC_029977.1	3761997	3780916	-	2028	pseudogene	-	BAH
107870975	354.415	875.085	436.442	1302.99	1470.77	1357.11	555.314	1376.96	-1.30944	0.000879815	0.0154433	LOC107870975	NC_029981.1	172398415	172401840	+	1877	protein_coding	homeobox-leucine zipper protein ATHB-6-like%2C transcript variant X2	Homeobox
107847408	1673.87	2044.95	1372.15	2925.85	3433.74	2846.42	1696.99	3068.67	-0.85467	0.000880687	0.0154474	LOC107847408	NC_029987.1	145149752	145174094	+	4559	protein_coding	alpha-glucan water dikinase%2C chloroplastic	-
107870967	505.291	173.399	372.519	132.649	112.051	141.401	350.403	128.7	1.44379	0.000883063	0.0154779	LOC107870967	NC_029977.1	31127938	31134480	+	3513	protein_coding	lysine-specific demethylase JMJ706-like	JmjN
107848280	195	152.591	319.616	72.7673	45.6504	111.28	222.402	76.5659	1.53946	0.000885944	0.0155172	LOC107848280	NC_029987.1	148251195	148255462	-	1662	protein_coding	ATP-citrate synthase alpha chain protein 2	-
107846852	62.6276	93.6352	54.0042	24.2558	31.5403	25.9374	70.089	27.2445	1.36519	0.000888896	0.0155576	LOC107846852	NC_029987.1	54047372	54048089	+	718	protein_coding	chromatin accessibility complex protein 1-like	-
107860337	98.2115	273.97	339.455	55.3335	52.2905	102.076	237.212	69.9001	1.76523	0.000891226	0.0155871	LOC107860337	NC_029978.1	156364757	156371093	+	1656	protein_coding	geraniol 8-hydroxylase-like	p450
107847427	153.722	325.989	330.638	110.667	85.4908	127.177	270.116	107.778	1.32747	0.000893693	0.015619	LOC107847427	NC_029977.1	246333579	246337357	-	2193	protein_coding	endo-1%2C4-beta-xylanase Z-like%2C transcript variant X2	-
107878498	44.124	655.446	169.727	45.4796	48.9704	50.2014	289.766	48.2171	2.58815	0.000897457	0.0156735	LOC107878498	NC_029983.1	209859029	209862929	-	1410	protein_coding	ribose-phosphate pyrophosphokinase 4	Pribosyltran
107845359	120.985	142.187	108.008	46.9955	67.2306	27.6108	123.727	47.279	1.38767	0.000903078	0.0157603	LOC107845359	NC_029986.1	6850361	6852143	+	1658	protein_coding	non-functional pseudokinase ZED1-like%2C transcript variant X1	Pkinase
107867174	9.96349	67.0474	27.5531	0.757993	5.81005	5.85683	34.8547	4.14163	3.08793	0.000906862	0.0158149	LOC107867174	NC_029980.1	9355511	9358113	+	2603	protein_coding	uncharacterized acetyltransferase At3g50280-like	-
107878678	149.452	715.558	364.804	117.489	115.371	125.504	409.938	119.455	1.7799	0.000912843	0.0158969	LOC107878678	NC_029977.1	140939913	140946002	+	675	protein_coding	uncharacterized LOC107878678%2C transcript variant X1	-
107853713	34.1605	235.822	103.6	28.8037	19.0902	32.6309	124.527	26.8416	2.21599	0.000912878	0.0158969	LOC107853713	NC_029977.1	29799803	29801630	-	1828	protein_coding	RING-H2 finger protein ATL52	-
107868806	274.708	1558.27	554.369	211.48	186.752	225.07	795.784	207.767	1.93779	0.000914953	0.0159216	LOC107868806	NC_029977.1	15672758	15673550	-	793	protein_coding	putative invertase inhibitor	-
107877823	14.2336	21.9638	16.5319	51.5435	48.1404	44.3446	17.5764	48.0095	-1.44267	0.000918808	0.0159667	LOC107877823	NC_029983.1	46376150	46379996	+	3063	protein_coding	zinc finger BED domain-containing protein RICESLEEPER 2-like%2C transcript variant X1	-
107859950	824.123	7452.67	2086.32	845.162	551.125	767.245	3454.37	721.177	2.26005	0.000918863	0.0159667	LOC107859950	NC_029978.1	148943970	148948824	+	1904	protein_coding	uncharacterized LOC107859950	-
107868077	8.54013	13.8719	11.0213	0.757993	0.830008	0.836691	11.1444	0.80823	3.79267	0.00092303	0.0160276	LOC107868077	NC_029980.1	169210642	169211917	+	1276	protein_coding	ethylene-responsive transcription factor ERF014	AP2
107851174	1124.45	917.856	1056.94	595.024	452.354	660.986	1033.08	569.455	0.859049	0.000923752	0.0160287	LOC107851174	NC_029988.1	158937047	158944185	+	547	protein_coding	uncharacterized LOC107851174	-
107862500	192.153	3819.39	713.075	266.055	184.262	256.027	1574.87	235.448	2.74184	0.000929189	0.0161115	LOC107862500	NC_029979.1	18509537	18510976	-	1094	protein_coding	mitochondrial outer membrane protein porin of 36 kDa-like	-
107875889	592.116	646.199	610.578	344.129	271.412	406.632	616.297	340.724	0.8552	0.000929986	0.0161138	LOC107875889	NC_029977.1	72536967	72545476	+	890	protein_coding	uncharacterized LOC107875889	FHA
107845696	324.525	257.786	113.519	71.2513	43.9904	102.913	231.943	72.7182	1.67199	0.000934702	0.0161839	LOC107845696	NC_029986.1	108523126	108523980	-	855	pseudogene	-	-
107867845	352.992	241.602	353.782	553.335	575.195	611.621	316.125	580.05	-0.876337	0.000936812	0.0162089	LOC107867845	NC_029980.1	75034406	75038181	-	3776	protein_coding	protein QUIRKY	C2
novel.3621	71.1678	28.8998	54.0042	132.649	108.731	170.685	51.3572	137.355	-1.42565	0.000937831	0.0162149	-	NC_029983.1	59782718	59787266	+	2236	-	PF05542:Protein of unknown function (DUF760)	-
107865624	352.992	359.513	376.927	137.955	223.272	92.036	363.144	151.088	1.26539	0.000938762	0.0162194	LOC107865624	NC_029977.1	4887370	4888291	+	922	protein_coding	protein P21-like	Thaumatin
107870804	324.525	323.677	391.255	210.722	190.902	205.826	346.486	202.483	0.775664	0.00094252	0.0162727	LOC107870804	NC_029981.1	116016641	116048769	-	3297	protein_coding	uncharacterized LOC107870804%2C transcript variant X1	-
107840322	478.247	734.054	467.301	253.928	287.183	310.412	559.868	283.841	0.980629	0.000943365	0.0162757	LOC107840322	NC_029977.1	177499096	177503003	+	3267	protein_coding	stachyose synthase	-
107865813	160.839	253.162	236.957	106.877	47.3104	97.8928	216.986	84.0267	1.36918	0.000944298	0.0162802	LOC107865813	NC_029979.1	3924170	3925583	+	774	protein_coding	uncharacterized LOC107865813	-
107878991	132.372	186.114	59.5148	40.9316	47.3104	20.0806	126	36.1075	1.80152	0.00094778	0.0163264	LOC107878991	NC_029984.1	692097	707603	+	2837	protein_coding	receptor-like protein 12	-
107870487	28.4671	30.0557	23.1446	57.6074	76.3607	62.7518	27.2225	65.5733	-1.27055	0.000949379	0.0163264	LOC107870487	NC_029981.1	31553839	31555420	+	1582	protein_coding	probable glycosyltransferase At5g11130	-
107840635	219.197	242.758	87.0679	422.202	590.135	463.527	183.008	491.955	-1.42811	0.000949924	0.0163264	LOC107840635	NC_029984.1	152759989	152762712	-	1804	protein_coding	probable flavin-containing monooxygenase 1	FMO-like
107871082	1487.41	1931.66	1620.12	868.66	733.727	1106.94	1679.73	903.109	0.895455	0.000950146	0.0163264	LOC107871082	NC_029981.1	191072307	191075276	+	665	protein_coding	30S ribosomal protein S31%2C chloroplastic	-
107852121	1296.68	1636.88	989.709	2546.1	2509.11	2295.88	1307.76	2450.36	-0.905988	0.000950344	0.0163264	LOC107852121	NW_015960394.1	966226	968515	+	1321	protein_coding	uncharacterized protein At4g22758-like	-
107858913	274.708	3442.54	774.794	299.407	268.092	249.334	1497.35	272.278	2.45937	0.00095368	0.0163721	LOC107858913	NC_029978.1	113554313	113556563	+	1328	protein_coding	protein PHLOEM PROTEIN 2-LIKE A1-like	-
107866783	244.817	150.279	144.378	363.836	633.296	333.003	179.825	443.378	-1.30433	0.000955662	0.0163945	LOC107866783	NC_029980.1	758988	761993	+	2106	protein_coding	polyol transporter 5-like%2C transcript variant X4	Sugar_tr
novel.5988	42.7007	12.7159	18.7361	93.9911	59.7605	96.2194	24.7176	83.3237	-1.77117	0.000960346	0.0164632	-	NC_029988.1	176822654	176826445	+	3792	-	-	-
107840596	1376.38	1302.8	1670.82	839.856	766.927	947.134	1450	851.306	0.768516	0.000961232	0.0164667	LOC107840596	NC_029984.1	151954919	151956284	-	1366	protein_coding	24-methylenesterol C-methyltransferase 2	Methyltransf_11
107872575	15.6569	64.7355	59.5148	14.4019	8.30008	6.69352	46.6357	9.79849	2.25231	0.000962055	0.0164692	LOC107872575	NC_029981.1	175750814	175752402	-	907	protein_coding	mitogen-activated protein kinase kinase kinase 1	SWIM
107840527	82.5546	126.003	114.621	44.7216	55.6105	49.3647	107.726	49.8989	1.11477	0.000964287	0.0164871	LOC107840527	NC_029984.1	150704206	150710036	-	2280	protein_coding	probable alkaline/neutral invertase B%2C transcript variant X4	-
107873179	44.124	235.822	162.012	41.6896	38.1803	35.9777	147.32	38.6159	1.93397	0.000964466	0.0164871	LOC107873179	NC_029977.1	45372091	45375242	+	1000	protein_coding	uncharacterized LOC107873179	-
107868271	32.7372	336.393	220.425	49.2695	29.8803	36.8144	196.518	38.6547	2.34684	0.000966248	0.0165059	LOC107868271	NC_029980.1	204786326	204788687	+	1804	protein_coding	glucan endo-1%2C3-beta-glucosidase 5-like	Glyco_hydro_17
107863346	596.386	334.081	932.398	246.348	124.501	259.374	620.955	210.074	1.56362	0.0009681	0.0165259	LOC107863346	NC_029979.1	65834150	65835530	-	1279	protein_coding	uncharacterized LOC107863346	-
107874550	31.3138	531.756	274.429	34.1097	53.9505	52.7115	279.166	46.9239	2.57414	0.000970548	0.016556	LOC107874550	NC_029982.1	836067	837335	-	1269	protein_coding	EID1-like F-box protein 3	-
novel.5156	81.1313	167.619	62.8212	37.8996	24.9002	37.6511	103.857	33.4836	1.63338	0.000971254	0.0165564	-	NC_029986.1	31667333	31669173	-	1841	-	PF14244:gag-polypeptide of LTR copia-type	-
107843194	338.759	301.713	341.659	505.581	548.635	533.809	327.377	529.342	-0.693452	0.000972758	0.0165644	LOC107843194	NC_029985.1	236801060	236806695	-	3977	protein_coding	heat stress transcription factor A-3%2C transcript variant X5	HSF_DNA-bind
107842771	34.1605	18.4958	37.4723	72.7673	69.7206	92.8727	30.0429	78.4535	-1.3869	0.000973092	0.0165644	LOC107842771	NC_029985.1	181797601	181808988	+	6686	protein_coding	uncharacterized LOC107842771%2C transcript variant X12	-
107853629	344.452	19.6518	398.97	40.1736	23.2402	49.3647	254.358	37.5929	2.75801	0.000976561	0.0166118	LOC107853629	NW_015960939.1	42938	46672	-	1758	protein_coding	GDSL esterase/lipase At1g29670-like%2C transcript variant X2	Lipase_GDSL
107845137	46.9707	671.63	145.481	50.7855	39.8404	51.0381	288.027	47.2213	2.60932	0.000978207	0.0166281	LOC107845137	NC_029986.1	199525339	199527467	-	842	protein_coding	protein RADIALIS-like 3	-
107839869	264.744	172.243	393.459	703.417	649.066	563.093	276.815	638.525	-1.20527	0.000980317	0.0166495	LOC107839869	NC_029984.1	136914108	136918914	+	3611	protein_coding	leucine-rich repeat receptor-like serine/threonine-protein kinase BAM3	Pkinase
107850869	1248.28	3124.64	3347.16	1068.01	998.499	974.745	2573.36	1013.75	1.34417	0.000980835	0.0166495	LOC107850869	NC_029988.1	47073958	47095357	-	2935	protein_coding	potassium channel AKT2/3-like	Ion_trans
107862848	22.7737	58.9555	14.3276	7.57993	5.81005	2.51007	32.0189	5.30002	2.5904	0.000984213	0.0166951	LOC107862848	NC_029979.1	30456633	30459293	-	1826	protein_coding	purple acid phosphatase 17-like%2C transcript variant X1	Metallophos
107839773	49.8174	384.945	284.348	49.2695	42.3304	68.6086	239.704	53.4028	2.16792	0.000986891	0.0167288	LOC107839773	NC_029984.1	135133339	135136966	+	1546	protein_coding	MLO-like protein 13	-
107863325	276.131	304.025	440.85	174.338	141.931	187.419	340.336	167.896	1.02067	0.000988572	0.0167456	LOC107863325	NC_029979.1	62930975	62942037	+	3046	protein_coding	methyl-CpG-binding domain-containing protein 13%2C transcript variant X1	MBD
107850312	68165.9	35736.3	47572.2	94752.1	112951	101737	50491.4	103146	-1.0306	0.000992662	0.0168031	LOC107850312	NC_029988.1	12357108	12362187	-	1881	protein_coding	catalase	Catalase
107864051	72.5911	753.706	235.855	89.4431	49.8005	65.2619	354.051	68.1685	2.37706	0.00099402	0.0168144	LOC107864051	NC_029979.1	232878186	232880682	-	1992	protein_coding	probable pectinesterase/pectinesterase inhibitor 7	-
107866121	21.3503	126.003	81.5573	15.9178	19.9202	16.7338	76.3035	17.5239	2.12725	0.0010029	0.0169528	LOC107866121	NC_029979.1	42395503	42398329	-	634	lncRNA	uncharacterized LOC107866121	-
107872543	483.941	1085.47	709.769	313.051	231.572	386.551	759.728	310.391	1.29194	0.00100478	0.0169727	LOC107872543	NC_029977.1	44578449	44582993	-	1227	protein_coding	MADS-box protein SOC1-like%2C transcript variant X3	SRF-TF
107840273	328.795	160.683	171.932	477.535	497.175	521.258	220.47	498.656	-1.18072	0.0010088	0.0170281	LOC107840273	NC_029984.1	145759696	145765110	+	2241	protein_coding	protein DJ-1 homolog C	DJ-1_PfpI
107878682	142.336	122.535	127.847	69.7353	74.7007	57.7317	130.906	67.3892	0.956043	0.00100947	0.0170281	LOC107878682	NC_029983.1	216342172	216345578	+	2635	protein_coding	putative disease resistance RPP13-like protein 3	NB-ARC
107855411	1732.22	1887.73	1828.43	2582.48	2986.37	2870.69	1816.13	2813.18	-0.631171	0.00101091	0.0170406	LOC107855411	NW_015961388.1	1130411	1132681	+	1151	protein_coding	uncharacterized LOC107855411	-
107855313	8.54013	65.8914	19.8383	4.54796	3.32003	5.02014	31.4233	4.29604	2.8757	0.00101225	0.0170431	LOC107855313	NW_015961387.1	509111	513892	+	1134	protein_coding	KAT8 regulatory NSL complex subunit 3	-
107862474	112.445	317.897	149.889	79.5892	34.8603	63.5885	193.41	59.346	1.70475	0.00101247	0.0170431	LOC107862474	NC_029979.1	17770924	17772846	+	1265	protein_coding	uncharacterized LOC107862474	-
107877900	230.584	655.446	940.113	158.42	248.172	151.441	608.714	186.011	1.71129	0.00102022	0.0171616	LOC107877900	NC_029983.1	79075804	79077192	+	1124	protein_coding	protein TIFY 10A-like	Zim
107878703	54.0875	40.4597	61.719	21.9818	12.4501	20.9173	52.0887	18.4497	1.49526	0.00102561	0.0172404	LOC107878703	NC_029983.1	216847849	216850366	+	1446	protein_coding	uncharacterized LOC107878703%2C transcript variant X1	-
107864387	34.1605	16.1839	9.91913	72.7673	53.1205	73.6288	20.0878	66.5055	-1.74986	0.00102789	0.0172536	LOC107864387	NC_029979.1	247519297	247553238	-	2712	pseudogene	-	NB-ARC
107860476	1429.05	1883.11	1021.67	3003.93	2966.45	2646.45	1444.61	2872.27	-0.99159	0.00102817	0.0172536	LOC107860476	NC_029978.1	158874475	158881575	+	3379	protein_coding	chaperone protein ClpB3%2C chloroplastic	AAA
107847764	438.393	469.332	719.688	281.973	293.823	225.906	542.471	267.234	1.02219	0.00102853	0.0172536	LOC107847764	NC_029987.1	14358683	14364025	+	1621	protein_coding	3-methyl-2-oxobutanoate hydroxymethyltransferase 1%2C mitochondrial-like	-
novel.6978	350.145	793.009	413.297	216.028	229.082	207.499	518.817	217.536	1.25464	0.001031	0.0172736	-	NW_015961388.1	1277754	1279540	-	1787	-	-	-
107851318	197.846	212.702	110.213	377.48	443.224	327.983	173.587	382.896	-1.14305	0.00103115	0.0172736	LOC107851318	NC_029988.1	23273636	23277894	+	2027	protein_coding	U-box domain-containing protein 4-like	Arm
107862778	2705.8	143.343	6207.17	319.873	282.203	570.623	3018.77	390.899	2.94914	0.00103982	0.0174068	LOC107862778	NC_029979.1	28016037	28017381	+	842	protein_coding	21 kDa seed protein-like	-
107863385	239.124	122.535	143.276	381.27	334.493	375.674	168.312	363.812	-1.1161	0.00104538	0.0174878	LOC107863385	NC_029979.1	73448227	73463442	+	3637	protein_coding	SNF2 domain-containing protein CLASSY 4-like	SNF2_N
novel.5003	7.11678	1.15599	3.30638	30.3197	14.9401	25.1007	3.85971	23.4535	-2.65144	0.00104794	0.0175155	-	NC_029986.1	159875348	159877818	+	2471	-	-	-
107879378	4.27007	24.2758	19.8383	1.51599	1.66002	1.67338	16.128	1.61646	3.33157	0.00104848	0.0175155	LOC107879378	NC_029984.1	135050535	135050837	+	303	protein_coding	uncharacterized LOC107879378	-
107872415	19.927	11.5599	35.268	5.30595	3.32003	0.836691	22.2516	3.15422	2.80848	0.00104989	0.0175172	LOC107872415	NC_029981.1	59191095	59192054	+	960	protein_coding	basic leucine zipper 43-like	bZIP_1
107855180	5.69342	65.8914	47.3914	2.27398	4.15004	8.36691	39.6588	4.93031	3.01948	0.00105004	0.0175172	LOC107855180	NW_015961347.1	71780	72641	+	862	pseudogene	-	-
novel.1265	85.4013	176.867	125.642	51.5435	50.6305	60.2417	129.303	54.1386	1.25953	0.00105476	0.0175839	-	NC_029979.1	10409895	10413241	+	3347	-	PF00665:Integrase core domain|PF13976:GAG-pre-integrase domain|PF00137:ATP synthase subunit C|PF14223:gag-polypeptide of LTR copia-type|PF13961:Domain of unknown function (DUF4219)	rve
107853643	27.0438	24.2758	33.0638	61.3974	68.0606	66.9352	28.1278	65.4644	-1.21535	0.00105584	0.0175899	LOC107853643	NC_029977.1	28968228	28969470	-	1243	protein_coding	zinc finger protein JAGGED	-
107850167	170.803	261.254	349.374	108.393	62.2506	128.85	260.477	99.8313	1.38503	0.00105838	0.0176201	LOC107850167	NC_029988.1	40962	48060	+	2735	protein_coding	probable acyl-activating enzyme 18%2C peroxisomal	AMP-binding
novel.6176	29.8905	23.1198	40.7787	97.0231	60.5906	85.3424	31.263	80.9854	-1.37084	0.00106095	0.0176506	-	NC_029988.1	61124294	61127458	-	3165	-	-	-
107861198	163.686	403.441	138.868	56.0915	76.3607	10.0403	235.331	47.4975	2.3086	0.00106167	0.0176506	LOC107861198	NC_029978.1	134570972	134571925	-	954	protein_coding	pathogenesis-related genes transcriptional activator PTI5-like	AP2
107870173	177.919	198.83	152.093	278.183	327.853	348.063	176.281	318.033	-0.851522	0.00107038	0.0177723	LOC107870173	NC_029981.1	5983344	5988056	-	3557	protein_coding	putative late blight resistance protein homolog R1A-3%2C transcript variant X3	NB-ARC
107870112	1000.62	856.589	720.79	1575.11	1450.85	1375.52	859.333	1467.16	-0.77251	0.00107046	0.0177723	LOC107870112	NC_029981.1	2804754	2810088	-	2028	protein_coding	heterogeneous nuclear ribonucleoprotein 1-like	RRM_1
107877942	24.197	9.24792	3.30638	42.4476	100.431	45.1813	12.2504	62.6866	-2.38277	0.00107316	0.0178049	LOC107877942	NC_029983.1	105026567	105030602	-	3766	protein_coding	putative receptor-like protein kinase At3g47110	LRRNT_2
107869472	31.3138	5.77995	109.11	3.78996	0.830008	8.36691	48.7347	4.32896	3.49687	0.00107428	0.0178101	LOC107869472	NC_029980.1	13875919	13883382	+	1224	protein_coding	EPIDERMAL PATTERNING FACTOR-like protein 2	-
107873310	13329.7	2951.24	7216.72	2489.25	1632.62	2893.28	7832.56	2338.38	1.74391	0.00107494	0.0178101	LOC107873310	NC_029982.1	132856290	132859039	-	2067	protein_coding	omega-3 fatty acid desaturase%2C chloroplastic-like	-
107869689	55.5109	91.3232	83.7616	18.9498	22.4102	40.1611	76.8652	27.1737	1.50624	0.00108223	0.0179186	LOC107869689	NC_029980.1	109101855	109105964	-	1438	pseudogene	-	-
107858840	735.875	417.312	630.416	274.393	292.163	325.473	594.534	297.343	0.999055	0.00108357	0.0179286	LOC107858840	NC_029978.1	107678279	107682516	+	2765	protein_coding	chloride channel protein CLC-b	Voltage_CLC
107868752	277.554	1218.41	1030.49	216.028	322.873	211.683	842.152	250.195	1.75164	0.00108548	0.0179479	LOC107868752	NC_029980.1	38430545	38441819	+	1108	pseudogene	-	-
107879384	710.254	2666.87	819.982	407.042	423.304	447.629	1399.04	425.992	1.71574	0.00108674	0.0179564	LOC107879384	NC_029984.1	135490558	135505866	+	6531	protein_coding	protein VARIATION IN COMPOUND TRIGGERED ROOT growth response-like	NB-ARC
107860338	119.562	485.516	416.604	122.795	100.431	92.036	340.56	105.087	1.69738	0.00108885	0.0179791	LOC107860338	NC_029978.1	156487028	156488364	+	1337	protein_coding	dof zinc finger protein DOF4.7-like	zf-Dof
107866836	17.0803	32.3677	26.451	89.4431	90.4708	46.018	25.2997	75.3106	-1.56554	0.00109004	0.0179864	LOC107866836	NC_029977.1	7759504	7761551	+	2048	protein_coding	protein DETOXIFICATION 56-like	MatE
107873127	42.7007	48.5516	68.3318	22.7398	16.6002	20.9173	53.1947	20.0857	1.40839	0.00109691	0.0180874	LOC107873127	NC_029977.1	45340206	45347556	-	1189	protein_coding	glutathione S-transferase 2-like%2C transcript variant X2	-
107840962	6691.19	1997.55	5064.27	1918.48	1240.86	1663.34	4584.34	1607.56	1.51173	0.00110118	0.0181455	LOC107840962	NC_029985.1	7043094	7058699	+	2820	protein_coding	beta-galactosidase-like%2C transcript variant X3	-
107843709	4355.47	28417.7	13915.4	4127.27	4638.08	3683.11	15562.9	4149.49	1.90712	0.00110363	0.0181652	LOC107843709	NC_029986.1	196910030	196913157	+	1181	protein_coding	GDSL esterase/lipase CPRD49-like	-
107867776	869.67	1202.23	1470.24	504.823	719.617	440.936	1180.71	555.125	1.08925	0.00110387	0.0181652	LOC107867776	NC_029980.1	64736544	64738824	-	1681	protein_coding	NAC domain-containing protein 2-like	NAM
107858675	1555.73	181.49	1745.77	241.042	146.081	322.126	1161	236.416	2.29589	0.00110778	0.0182171	LOC107858675	NC_029978.1	87897553	87901938	-	2130	protein_coding	L-ascorbate oxidase homolog	-
107867927	513.831	529.444	509.182	313.809	309.593	349.737	517.486	324.379	0.674004	0.00110927	0.0182195	LOC107867927	NC_029980.1	114971785	114983091	-	2139	protein_coding	phosphoglucan phosphatase LSF1%2C chloroplastic	DSPc
107851641	21.3503	8.09193	17.634	56.8495	39.8404	51.0381	15.6921	49.2426	-1.66274	0.00110943	0.0182195	LOC107851641	NC_029988.1	191879058	191894276	+	718	lncRNA	uncharacterized LOC107851641	-
107870313	691.751	396.505	757.16	299.407	313.743	255.191	615.139	289.447	1.08734	0.00111045	0.0182223	LOC107870313	NC_029981.1	13501407	13505133	+	3586	protein_coding	probable LRR receptor-like serine/threonine-protein kinase At3g47570%2C transcript variant X3	Pkinase
107867005	204.963	113.287	150.991	292.585	379.313	306.229	156.414	326.042	-1.06282	0.00111112	0.0182223	LOC107867005	NC_029980.1	5568262	5573020	+	2419	protein_coding	S-adenosyl-L-methionine-dependent tRNA 4-demethylwyosine synthase	Radical_SAM
107865937	9.96349	28.8998	19.8383	1.51599	4.98005	2.51007	19.5672	3.00203	2.72175	0.00111186	0.0182223	LOC107865937	NC_029979.1	15696028	15696847	+	820	protein_coding	probable calcium-binding protein CML15	-
novel.7060	7.11678	95.9472	29.7574	1.51599	5.81005	7.53022	44.2738	4.95208	3.17098	0.00111269	0.0182236	-	NW_015961516.1	20103	20414	-	312	-	-	-
107878305	89.6714	58.9555	79.3531	156.904	139.441	156.461	75.9933	150.936	-0.994033	0.00111496	0.0182484	LOC107878305	NC_029983.1	192899310	192903198	-	2348	pseudogene	-	-
107840863	357.262	380.321	588.535	144.019	101.261	255.191	442.039	166.823	1.4067	0.00111751	0.0182778	LOC107840863	NC_029985.1	5048000	5050514	+	1561	protein_coding	shikimate O-hydroxycinnamoyltransferase-like	-
107851691	108.175	119.067	121.234	56.0915	61.4206	65.2619	116.159	60.9246	0.933275	0.00112164	0.0183284	LOC107851691	NC_029988.1	21157020	21159816	+	1227	protein_coding	cyclin-D3-3-like	Cyclin_C
novel.7151	175.073	730.586	322.923	121.279	131.141	129.687	409.527	127.369	1.68588	0.00112242	0.0183284	-	NW_015961652.1	27762	29670	-	589	-	PF00400:WD domain, G-beta repeat	WD40
107874868	486.788	596.491	618.293	239.526	197.542	369.817	567.19	268.962	1.07713	0.00112309	0.0183284	LOC107874868	NC_029977.1	60497181	60501984	-	2192	protein_coding	IRK-interacting protein	-
novel.6816	15.6569	3.46797	6.61275	28.0457	35.6903	46.018	8.57921	36.5847	-2.12671	0.00112363	0.0183284	-	NW_015961147.1	689669	691826	+	2158	-	-	-
107873566	264.744	367.605	337.25	178.128	155.211	194.949	323.2	176.096	0.877497	0.00112577	0.018351	LOC107873566	NC_029982.1	210853297	210871446	-	1211	protein_coding	uncharacterized HIT-like protein MT1300%2C transcript variant X1	HIT
107850957	417.043	462.396	572.003	209.206	187.582	312.922	483.814	236.57	1.03312	0.00113502	0.0184892	LOC107850957	NC_029988.1	155402308	155434665	+	2070	protein_coding	protein LUTEIN DEFICIENT 5%2C chloroplastic	p450
107878911	129.525	137.563	105.804	228.914	218.292	218.376	124.297	221.861	-0.837444	0.0011365	0.018501	LOC107878911	NC_029983.1	221333487	221336038	-	1788	protein_coding	release factor glutamine methyltransferase	-
107856945	229.16	268.19	664.582	123.553	136.951	148.094	387.311	136.199	1.50912	0.00113888	0.0185173	LOC107856945	NW_015961809.1	27981	28694	+	714	protein_coding	histone H3.2	Histone
novel.3140	9.96349	6.93594	16.5319	44.7216	30.7103	40.1611	11.1438	38.531	-1.78159	0.00113944	0.0185173	-	NC_029982.1	79189669	79190327	+	659	-	-	-
107844922	31.3138	15.0279	11.0213	68.9773	48.1404	62.7518	19.121	59.9565	-1.67181	0.00113979	0.0185173	LOC107844922	NC_029986.1	87378204	87380939	-	946	pseudogene	-	-
107845358	2.84671	1.15599	0	13.6439	19.0902	12.5504	1.33423	15.0948	-3.60061	0.00114167	0.0185283	LOC107845358	NC_029986.1	6851885	6855836	-	3367	protein_coding	pentatricopeptide repeat-containing protein At3g16610-like	PPR
107839758	135.219	33.5237	203.893	21.9818	19.0902	41.8345	124.212	27.6355	2.1693	0.001142	0.0185283	LOC107839758	NC_029984.1	134704579	134706317	-	1071	protein_coding	probable carbohydrate esterase At4g34215	-
107867043	668.977	616.143	651.356	369.142	368.523	445.956	645.492	394.541	0.710221	0.00114413	0.0185503	LOC107867043	NC_029980.1	6157891	6160681	-	2067	protein_coding	protein BRASSINAZOLE-RESISTANT 1-like	-
107850566	562.225	463.552	527.918	869.418	1015.93	770.592	517.899	885.313	-0.773998	0.00114527	0.0185564	LOC107850566	NC_029988.1	29019707	29031008	-	2429	protein_coding	wall-associated receptor kinase-like 20%2C transcript variant X1	Pkinase
107843154	1000.62	805.725	836.513	1352.26	1486.54	1424.05	880.952	1420.95	-0.690329	0.00114615	0.0185582	LOC107843154	NC_029985.1	235977662	235992975	+	3434	protein_coding	ER membrane protein complex subunit 1%2C transcript variant X2	-
107870877	157.992	1053.11	482.731	156.146	135.291	146.421	564.61	145.953	1.9523	0.00115056	0.0186173	LOC107870877	NC_029981.1	140877129	140892529	-	1080	protein_coding	tetraspanin-2-like	Tetraspannin
107868137	22.7737	715.558	58.4127	24.2558	15.7701	41.8345	265.581	27.2868	3.28365	0.00115299	0.0186367	LOC107868137	NC_029980.1	188002669	188009324	+	1478	protein_coding	2-alkenal reductase (NADP(+)-dependent)	ADH_zinc_N
novel.5121	15.6569	110.975	62.8212	12.8859	12.4501	14.2237	63.151	13.1866	2.26455	0.0011533	0.0186367	-	NC_029986.1	4667809	4668842	-	1034	-	-	-
107844016	1090.29	1521.28	1365.53	772.395	748.667	819.12	1325.7	780.06	0.76556	0.00115456	0.0186446	LOC107844016	NC_029986.1	204528354	204531074	-	1863	protein_coding	patatin-like protein 3	-
107845100	320.255	238.134	306.391	143.261	106.241	175.705	288.26	141.736	1.02359	0.00115722	0.0186751	LOC107845100	NC_029986.1	193249629	193250568	-	940	protein_coding	uncharacterized LOC107845100	-
107870969	56.9342	112.131	124.54	35.6257	37.3503	41.8345	97.8685	38.2702	1.36019	0.00116035	0.0187131	LOC107870969	NC_029981.1	169613734	169621328	+	2172	protein_coding	uncharacterized LOC107870969	Lipase_3
107878213	9.96349	27.7438	20.9404	3.78996	4.15004	2.51007	19.5492	3.48336	2.4958	0.00116581	0.0187887	LOC107878213	NC_029983.1	178660079	178669417	-	3128	protein_coding	DNA repair protein RAD16-like	zf-C3HC4
107854042	12.8102	547.939	45.1872	28.8037	16.6002	11.7137	201.979	19.0392	3.40656	0.00116689	0.0187936	LOC107854042	NW_015961049.1	345	1359	-	437	protein_coding	defensin-like protein	-
107860290	508.138	451.992	235.855	198.594	169.322	115.463	398.662	161.126	1.3055	0.00116933	0.0188203	LOC107860290	NC_029978.1	155535652	155537153	-	1502	protein_coding	mitogen-activated protein kinase kinase kinase NPK1-like	Pkinase
107847771	11.3868	13.8719	12.1234	41.6896	57.2705	26.7741	12.4607	41.9114	-1.74691	0.00117198	0.0188504	LOC107847771	NC_029987.1	3987889	3990310	+	1627	protein_coding	uncharacterized LOC107847771	-
107869305	7.11678	2.31198	1.10213	28.0457	14.9401	23.4273	3.51029	22.1377	-2.72336	0.00117869	0.0189427	LOC107869305	NC_029980.1	212795950	212799372	+	2795	protein_coding	LRR receptor-like serine/threonine-protein kinase GSO2	LRR_1
107839860	128.102	134.095	103.6	216.028	229.082	210.009	121.932	218.373	-0.84234	0.00117928	0.0189427	LOC107839860	NC_029984.1	136799806	136803454	+	2093	protein_coding	phosphoribosylamine--glycine ligase	-
107878606	263.321	219.638	319.616	110.667	141.931	156.461	267.525	136.353	0.973524	0.00118218	0.0189767	LOC107878606	NC_029983.1	214045421	214075305	+	1786	pseudogene	-	p450
107854241	374.342	379.165	650.254	237.252	196.712	235.11	467.92	223.025	1.06992	0.00118373	0.018989	LOC107854241	NW_015961127.1	647548	649211	-	1664	protein_coding	UDP-glucuronate 4-epimerase 1-like	Epimerase
107842423	35.5839	43.9276	17.634	83.3792	100.431	76.9755	32.3818	86.9285	-1.4295	0.00118736	0.0190348	LOC107842423	NC_029985.1	61465025	61467926	+	2902	protein_coding	pentatricopeptide repeat-containing protein At3g46790%2C chloroplastic	PPR
107861169	15.6569	217.326	56.2084	15.9178	14.9401	15.0604	96.3972	15.3061	2.65684	0.00119153	0.0190889	LOC107861169	NC_029977.1	240625251	240629509	-	2090	protein_coding	inactive glucose-1-phosphate adenylyltransferase small subunit 2%2C chloroplastic	-
107851106	999.195	635.795	653.561	1517.5	1759.62	1247.51	762.85	1508.21	-0.984222	0.00119329	0.0191045	LOC107851106	NC_029988.1	202907785	202910720	-	1409	protein_coding	putative F-box protein PP2-B12	F-box
107848053	230.584	1321.3	633.722	170.548	159.361	257.701	728.534	195.87	1.89568	0.00120146	0.0192226	LOC107848053	NC_029987.1	178109351	178111951	+	968	protein_coding	glutathione S-transferase U17-like	GST_N
107875907	733.028	793.009	643.641	1160.49	1246.67	1094.39	723.226	1167.18	-0.690704	0.00120558	0.0192758	LOC107875907	NC_029982.1	16773907	16778630	+	4146	protein_coding	uncharacterized LOC107875907%2C transcript variant X3	PWWP
107854069	86.8247	49.7076	77.1488	145.535	162.681	141.401	71.227	149.872	-1.07733	0.00120682	0.0192829	LOC107854069	NW_015961065.1	159	5547	+	2599	protein_coding	protein NLP7-like%2C transcript variant X1	RWP-RK
107870893	133.795	79.7633	167.523	281.973	249.002	322.963	127.027	284.646	-1.16387	0.00120775	0.019285	LOC107870893	NC_029981.1	151266047	151271314	-	2892	protein_coding	uncharacterized LOC107870893%2C transcript variant X15	-
107848239	677.517	1480.82	1414.03	522.257	534.525	537.155	1190.79	531.312	1.16484	0.00121085	0.0193218	LOC107848239	NC_029987.1	29262626	29263672	-	614	protein_coding	histone H4	-
107854061	14.2336	60.1115	52.902	9.8539	4.15004	11.7137	42.4157	8.57254	2.31199	0.0012135	0.0193407	LOC107854061	NW_015961059.1	18979	21239	-	773	protein_coding	HVA22-like protein e%2C transcript variant X2	TB2_DP1_HVA22
107857374	76.8612	188.426	292.063	73.5253	47.3104	52.7115	185.784	57.8491	1.68494	0.00121363	0.0193407	LOC107857374	NC_029977.1	288481437	288483431	+	1071	protein_coding	methanol O-anthraniloyltransferase-like	-
107843001	111.022	542.159	273.327	93.2331	82.1707	96.2194	308.836	90.5411	1.77135	0.00121617	0.0193684	LOC107843001	NC_029985.1	221312452	221316917	-	831	lncRNA	uncharacterized LOC107843001	-
novel.6289	15.6569	1.15599	11.0213	40.1736	42.3304	48.5281	9.27805	43.6774	-2.2564	0.00122499	0.0194942	-	NC_029988.1	208541169	208541776	-	587	-	-	-
107839881	18.5036	9.24792	11.0213	40.1736	34.0303	45.1813	12.9243	39.7951	-1.64265	0.00122568	0.0194942	LOC107839881	NC_029984.1	137301732	137303894	-	2163	protein_coding	protein ROOT PRIMORDIUM DEFECTIVE 1	-
107867727	88.248	0	28.6553	2.27398	0	1.67338	38.9678	1.31579	4.87543	0.00122649	0.0194942	LOC107867727	NC_029977.1	11508051	11511472	+	1409	protein_coding	inositol 2-dehydrogenase/D-chiro-inositol 3-dehydrogenase	GFO_IDH_MocA
107854333	59.7809	65.8914	88.1701	31.8357	34.0303	26.7741	71.2808	30.88	1.21024	0.0012353	0.0196214	LOC107854333	NW_015961146.1	99858	114854	+	2743	protein_coding	uncharacterized LOC107854333	-
107853595	41.2773	11.5599	36.3702	5.30595	2.49002	8.36691	29.7358	5.38763	2.46134	0.00123924	0.0196711	LOC107853595	NW_015960920.1	19329	19940	+	612	protein_coding	auxin-responsive protein SAUR68-like	Auxin_inducible
107843501	111.022	1235.75	241.366	108.393	54.7805	116.3	529.38	93.1578	2.50682	0.00124104	0.0196868	LOC107843501	NC_029986.1	177653779	177655921	-	2009	protein_coding	delta(8)-fatty-acid desaturase-like	-
107854184	32.7372	506.324	85.9658	34.8677	19.9202	38.4878	208.342	31.0919	2.74501	0.00124445	0.019728	LOC107854184	NW_015961110.1	143301	144285	+	985	protein_coding	calcium-binding protein PBP1-like	-
107851618	83.978	89.0112	87.0679	166.758	162.681	143.074	86.6857	157.505	-0.861012	0.0012481	0.0197728	LOC107851618	NC_029977.1	300283562	300286131	-	1444	protein_coding	serine racemase	PALP
novel.5056	51.2408	65.8914	111.315	32.5937	23.2402	27.6108	76.149	27.8149	1.45656	0.00125141	0.0198124	-	NC_029986.1	188667076	188669507	+	518	-	-	-
novel.4226	7.11678	18.4958	15.4298	2.27398	0	0	13.6808	0.757993	4.12452	0.00125244	0.0198156	-	NC_029984.1	44052721	44056455	-	322	-	-	-
107867775	600.656	633.483	327.331	1189.29	1577.01	879.362	520.49	1215.22	-1.22382	0.00125501	0.0198434	LOC107867775	NC_029977.1	11611327	11614076	-	1268	protein_coding	GEM-like protein 5	GRAM
107850724	41.2773	20.8078	19.8383	66.7034	67.2306	82.8324	27.3078	72.2554	-1.42036	0.00126034	0.0199148	LOC107850724	NC_029988.1	222385413	222401964	+	2358	protein_coding	uncharacterized LOC107850724%2C transcript variant X3	-
107858954	1012.01	694.75	746.139	1427.3	1557.09	1348.75	817.632	1444.38	-0.821772	0.00126245	0.0199349	LOC107858954	NC_029978.1	117857270	117862745	+	3905	protein_coding	leucine--tRNA ligase%2C cytoplasmic-like	-
107859459	2196.24	1906.23	1921.01	1319.67	1324.69	1104.43	2007.82	1249.6	0.683911	0.00126377	0.0199429	LOC107859459	NC_029978.1	138257867	138265169	+	2542	pseudogene	-	-
107856723	28.4671	253.162	221.527	38.6576	28.2203	39.3245	167.719	35.4008	2.24596	0.00126504	0.0199499	LOC107856723	NW_015961751.1	234192	237494	+	796	protein_coding	reticulon-like protein B14	-
107850384	99.6349	67.0474	66.1275	151.599	151.891	158.135	77.6033	153.875	-0.994471	0.00126663	0.0199619	LOC107850384	NC_029988.1	2447268	2451422	+	4034	protein_coding	F-box/LRR-repeat protein 25-like%2C transcript variant X1	F-box
107842608	9.96349	79.7633	57.3105	6.82193	11.6201	8.36691	49.0125	8.93632	2.46293	0.00127141	0.0200243	LOC107842608	NC_029985.1	130761711	130763669	+	1394	protein_coding	trihelix transcription factor GT-3b	-
107843864	499.598	1679.65	699.85	318.357	384.293	280.291	959.7	327.647	1.55079	0.00127529	0.0200724	LOC107843864	NC_029986.1	201612159	201613179	+	1021	protein_coding	probable calcium-binding protein CML36	-
107858055	74.0145	45.0836	47.3914	116.731	110.391	129.687	55.4965	118.936	-1.10856	0.00128297	0.0201801	LOC107858055	NC_029978.1	127851275	127853536	-	1324	pseudogene	-	-
107861818	323.102	552.563	483.833	209.964	241.532	242.64	453.166	231.379	0.971305	0.00128409	0.0201812	LOC107861818	NC_029979.1	4063604	4064418	+	815	protein_coding	uncharacterized LOC107861818	-
107860318	710.254	32.3677	898.233	90.9591	40.6704	102.913	546.952	78.1808	2.80634	0.00128491	0.0201812	LOC107860318	NC_029978.1	156117041	156120450	+	1177	protein_coding	uncharacterized oxidoreductase YoxD-like	adh_short
novel.6754	7.11678	12.7159	15.4298	0.757993	0.830008	1.67338	11.7541	1.08713	3.45419	0.00128701	0.0201812	-	NW_015961041.1	545097	547228	-	857	-	-	-
107838804	136.642	102.883	115.723	62.1554	34.0303	58.5683	118.416	51.5847	1.19582	0.00128802	0.0201812	LOC107838804	NC_029984.1	2765338	2766838	-	1501	protein_coding	leucine-rich repeat extensin-like protein 4	LRRNT_2
107853000	0	63.5795	5.51063	0.757993	0	0	23.03	0.252664	6.31751	0.00128828	0.0201812	LOC107853000	NW_015960692.1	10739	12259	-	1521	protein_coding	uncharacterized acetyltransferase At3g50280-like	-
107849508	132.372	117.911	95.8849	45.4796	68.0606	40.9978	115.389	51.5127	1.162	0.00128878	0.0201812	LOC107849508	NC_029988.1	225049444	225053157	-	3714	protein_coding	receptor-like protein kinase FERONIA	Pkinase_Tyr
107863221	78.2845	31.2117	58.4127	143.261	116.201	170.685	55.9696	143.382	-1.36355	0.00128961	0.0201812	LOC107863221	NC_029979.1	50736854	50739010	-	2005	lncRNA	uncharacterized LOC107863221	-
107854884	745.838	752.55	592.944	1230.98	1252.48	1038.33	697.111	1173.93	-0.752396	0.0012897	0.0201812	LOC107854884	NW_015961288.1	93490	109510	+	2628	protein_coding	long chain acyl-CoA synthetase 6%2C peroxisomal	AMP-binding
novel.412	1.42336	5.77995	8.81701	24.2558	24.0702	29.2842	5.3401	25.8701	-2.23244	0.00129784	0.0202915	-	NC_029977.1	8419334	8429567	-	1112	-	-	-
107855483	530.912	82.0753	155.4	49.2695	68.0606	63.5885	256.129	60.3062	2.0849	0.00129843	0.0202915	LOC107855483	NW_015961390.1	433201	436559	+	1890	protein_coding	uncharacterized LOC107855483	SAM_decarbox
107858962	45.5474	27.7438	17.634	107.635	123.671	55.2216	30.3084	95.5092	-1.66811	0.0013041	0.020367	LOC107858962	NC_029978.1	118620117	118624627	+	4276	protein_coding	putative receptor-like protein kinase At3g47110%2C transcript variant X1	Pkinase
107848175	128.102	120.223	123.438	58.3654	56.4405	76.1388	123.921	63.6483	0.961507	0.00130508	0.0203692	LOC107848175	NC_029987.1	19120003	19131233	+	1206	protein_coding	uncharacterized LOC107848175	-
107861626	55.5109	176.867	90.3743	26.5297	19.0902	46.018	107.584	30.546	1.81965	0.00130957	0.020426	LOC107861626	NC_029979.1	825896	829335	-	2094	protein_coding	uncharacterized LOC107861626	Lipase_3
novel.2278	39.8539	12.7159	24.2468	68.2193	69.7206	87.0158	25.6055	74.9853	-1.5647	0.00131135	0.0204407	-	NC_029980.1	21580243	21584640	-	4346	-	PF02786:Carbamoyl-phosphate synthase L chain, ATP binding domain	CPSase_L_D2
107843688	9577.76	50493.7	27979.7	8941.28	9659.63	7828.08	29350.4	8809.66	1.73623	0.00131658	0.0204946	LOC107843688	NC_029986.1	195864525	195867637	-	1158	protein_coding	GDSL esterase/lipase CPRD49-like	-
107867162	516.678	1038.08	789.122	389.608	319.553	399.101	781.293	369.421	1.08123	0.00131728	0.0204946	LOC107867162	NC_029980.1	8984348	8986757	-	1403	protein_coding	uncharacterized LOC107867162	-
107863289	64.051	58.9555	38.5744	113.699	122.011	107.096	53.8603	114.269	-1.09157	0.00131735	0.0204946	LOC107863289	NC_029979.1	58391815	58393693	+	1726	protein_coding	probable (S)-N-methylcoclaurine 3'-hydroxylase isozyme 2	p450
107859861	118.138	146.811	58.4127	261.507	252.322	259.374	107.787	257.735	-1.25968	0.00132129	0.0205301	LOC107859861	NC_029977.1	208534723	208535496	+	774	protein_coding	uncharacterized LOC107859861	-
107840763	32.7372	182.646	114.621	28.0457	22.4102	33.4676	110.002	27.9745	1.97852	0.00132132	0.0205301	LOC107840763	NC_029985.1	548577	550039	+	523	lncRNA	uncharacterized LOC107840763	-
107855341	146.606	49.7076	83.7616	240.284	193.392	397.428	93.3582	277.034	-1.57365	0.00132337	0.0205487	LOC107855341	NW_015961387.1	651922	656795	+	975	protein_coding	uncharacterized LOC107855341%2C transcript variant X2	-
107845602	41.2773	92.4792	91.4764	29.5617	21.5802	29.2842	75.0777	26.8087	1.49055	0.00132716	0.0205878	LOC107845602	NC_029986.1	19264644	19268393	-	2073	protein_coding	squamosa promoter-binding protein 1%2C transcript variant X2	SBP
107856211	1253.98	1247.31	1321.45	797.408	636.616	864.301	1274.25	766.108	0.734051	0.00132759	0.0205878	LOC107856211	NW_015961588.1	8267	9906	-	742	protein_coding	50S ribosomal protein L34%2C chloroplastic-like	-
novel.2283	14.2336	16.1839	7.71488	34.8677	38.1803	45.1813	12.7108	39.4098	-1.64072	0.00133065	0.0206082	-	NC_029980.1	23286889	23305409	-	2349	-	-	-
107865886	17.0803	157.215	144.378	26.5297	20.7502	14.2237	106.224	20.5012	2.37488	0.00133122	0.0206082	LOC107865886	NC_029979.1	10717999	10719645	+	938	protein_coding	reticulon-like protein B9	-
107839063	243.394	2846.05	526.816	268.329	200.032	202.479	1205.42	223.613	2.43055	0.00133156	0.0206082	LOC107839063	NC_029984.1	101485906	101487691	-	1786	protein_coding	vegetative cell wall protein gp1	-
107878072	357.262	313.273	212.71	636.714	810.087	463.527	294.415	636.776	-1.11428	0.00133231	0.0206082	LOC107878072	NC_029983.1	156328411	156334127	+	1702	protein_coding	UDP-arabinose 4-epimerase 1-like%2C transcript variant X1	-
107873413	1736.49	2.31198	611.68	20.4658	24.9002	15.8971	783.495	20.4211	5.26164	0.00133943	0.0207052	LOC107873413	NC_029982.1	170511602	170516656	+	2319	protein_coding	asparagine synthetase [glutamine-hydrolyzing]-like	-
107850320	157.992	92.4792	116.825	241.8	222.442	266.904	122.432	243.715	-0.997444	0.00134608	0.0207948	LOC107850320	NC_029988.1	228626970	228661177	+	3583	protein_coding	F-box/kelch-repeat protein At3g23880-like	F-box
107848381	216.35	560.655	376.927	175.854	130.311	159.808	384.644	155.324	1.30921	0.00134776	0.0208074	LOC107848381	NC_029987.1	87763953	87768246	-	594	protein_coding	reactive oxygen species modulator 1-like%2C transcript variant X1	-
107856799	8.54013	24.2758	23.1446	3.03197	0.830008	4.18345	18.6535	2.68181	2.80575	0.00135189	0.0208537	LOC107856799	NW_015961757.1	712944	713521	-	578	protein_coding	uncharacterized LOC107856799	-
107863830	32.7372	460.084	122.336	39.4156	42.3304	23.4273	205.052	35.0578	2.54891	0.00135248	0.0208537	LOC107863830	NC_029979.1	206660246	206666936	+	1249	protein_coding	NAC domain-containing protein 21/22-like	NAM
107845103	145.182	73.9834	150.991	50.0275	54.7805	49.3647	123.386	51.3909	1.26249	0.00135534	0.0208844	LOC107845103	NC_029986.1	193458205	193462644	+	1277	protein_coding	uridine nucleosidase 1-like	-
107845964	136.642	166.463	91.4764	230.43	292.163	305.392	131.527	275.995	-1.07018	0.00135638	0.0208872	LOC107845964	NC_029986.1	138548879	138550899	-	2021	protein_coding	WSC domain-containing protein ARB_07867	-
107854608	1421.93	17931.7	4070.15	1566.77	1561.24	1411.5	7807.93	1513.17	2.36739	0.00135933	0.0209194	LOC107854608	NC_029977.1	52526287	52527628	+	542	lncRNA	uncharacterized LOC107854608	-
107860737	232.007	217.326	112.417	483.599	641.596	307.902	187.25	477.699	-1.35284	0.00136469	0.0209885	LOC107860737	NC_029978.1	162867328	162871314	+	3159	pseudogene	-	-
107855308	1416.24	1386.03	1514.32	885.335	925.458	1002.36	1438.86	937.716	0.61788	0.0013703	0.0210543	LOC107855308	NW_015961387.1	84022	85014	+	993	protein_coding	NAD(P)H-quinone oxidoreductase subunit S%2C chloroplastic	-
107851664	7.11678	4.62396	17.634	0.757993	0	0	9.79158	0.252664	5.08743	0.00137071	0.0210543	LOC107851664	NC_029988.1	207202640	207204868	-	936	protein_coding	ferredoxin%2C root R-B2-like	Fer2
107873146	462.59	393.037	400.072	682.193	707.996	628.355	418.566	672.848	-0.685882	0.00137361	0.0210702	LOC107873146	NC_029982.1	78792778	78794933	-	1960	protein_coding	uncharacterized LOC107873146%2C transcript variant X2	-
novel.6795	19.927	54.3315	41.8808	7.57993	14.9401	6.69352	38.7131	9.73786	1.99981	0.00137415	0.0210702	-	NW_015961127.1	309928	318556	+	609	-	-	-
107867245	143.759	114.443	146.583	286.521	354.413	200.806	134.928	280.58	-1.05685	0.00137435	0.0210702	LOC107867245	NC_029977.1	8832486	8836376	+	1699	protein_coding	rhomboid-like protein 14%2C mitochondrial%2C transcript variant X2	Rhomboid
107859279	65.4743	417.312	176.34	54.5755	34.0303	69.4453	219.709	52.6837	2.06146	0.00137638	0.021088	LOC107859279	NC_029978.1	132693919	132700304	+	1092	protein_coding	protein LIGHT-DEPENDENT SHORT HYPOCOTYLS 10-like	-
107853004	5.69342	26.5878	108.008	4.54796	2.49002	8.36691	46.7632	5.13496	3.19321	0.00137781	0.0210965	LOC107853004	NC_029977.1	12227012	12236372	+	1375	protein_coding	uncharacterized LOC107853004%2C transcript variant X2	-
107853915	48.3941	97.1032	84.8637	30.3197	28.2203	33.4676	76.787	30.6692	1.32963	0.00138309	0.021164	LOC107853915	NW_015960990.1	4685	13185	+	2226	protein_coding	protein S-acyltransferase 8-like%2C transcript variant X2	-
107862425	952.225	191.894	1179.27	256.202	196.712	162.318	774.465	205.077	1.91678	0.00138491	0.0211784	LOC107862425	NC_029979.1	16738458	16742112	-	2158	protein_coding	calmodulin-binding protein 60 A-like	-
107855464	74.0145	91.3232	59.5148	37.8996	25.7302	31.7942	74.9508	31.808	1.23417	0.00138787	0.0212023	LOC107855464	NW_015961389.1	704	4881	-	1332	protein_coding	tropomyosin-like	-
107861622	676.094	634.639	554.369	378.996	409.194	348.9	621.701	379.03	0.713259	0.00138822	0.0212023	LOC107861622	NC_029979.1	782416	784504	+	2089	protein_coding	mitogen-activated protein kinase kinase 5-like	Pkinase
107873719	398.539	5055.15	1430.56	455.554	418.324	503.688	2294.75	459.188	2.32129	0.0013918	0.0212435	LOC107873719	NC_029982.1	218211317	218214998	+	711	protein_coding	universal stress protein A homolog 1-like	Usp
107877828	314.562	233.51	255.693	424.476	474.764	483.607	267.922	460.949	-0.784594	0.00139285	0.0212462	LOC107877828	NC_029983.1	47619855	47621989	+	2135	protein_coding	ectonucleotide pyrophosphatase/phosphodiesterase family member 1-like	-
107859545	237.7	1027.68	461.791	203.9	160.191	179.052	575.722	181.048	1.6695	0.00139407	0.0212514	LOC107859545	NC_029978.1	140819467	140822834	+	2045	protein_coding	uncharacterized LOC107859545%2C transcript variant X1	-
107840405	76.8612	127.159	92.5786	178.128	195.882	232.6	98.8662	202.203	-1.02855	0.0014011	0.0213453	LOC107840405	NC_029984.1	148385001	148388271	-	2038	protein_coding	uncharacterized LOC107840405	-
107869428	21.3503	45.0836	12.1234	5.30595	5.81005	4.18345	26.1858	5.09982	2.36044	0.00140502	0.0213914	LOC107869428	NC_029980.1	6686773	6688277	-	1505	protein_coding	elongation of fatty acids protein 3-like	ELO
novel.2840	126.679	284.374	267.817	94.7491	92.9608	100.403	226.29	96.0376	1.23907	0.00141242	0.0214892	-	NC_029981.1	84037099	84038172	-	1074	-	-	-
107852226	5.69342	1.15599	22.0425	0	0	0	9.63064	0	6.02434	0.00141322	0.0214892	LOC107852226	NW_015960451.1	39557	40656	-	599	protein_coding	defensin-like protein	-
107847668	489.634	620.767	461.791	868.66	1017.59	830.834	524.064	905.694	-0.789027	0.00142022	0.0215821	LOC107847668	NC_029987.1	64997581	65002359	-	3159	protein_coding	lipoxygenase 6%2C chloroplastic%2C transcript variant X1	Lipoxygenase
107858923	65.4743	523.664	128.949	63.6714	41.5004	46.018	239.362	50.3966	2.24824	0.00142176	0.021592	LOC107858923	NC_029978.1	114152304	114158215	-	2422	protein_coding	uncharacterized LOC107858923%2C transcript variant X1	-
107875963	267.591	2755.88	818.879	364.594	237.382	193.276	1280.78	265.084	2.27256	0.00142705	0.0216588	LOC107875963	NC_029982.1	17998672	18001102	+	2431	protein_coding	probable endo-1%2C3(4)-beta-glucanase ARB_01444	-
107846655	149.452	17.3399	203.893	19.7078	9.96009	32.6309	123.562	20.7663	2.57309	0.001435	0.0217572	LOC107846655	NC_029987.1	193292362	193292718	-	357	protein_coding	auxin-responsive protein SAUR68-like	Auxin_inducible
107850430	2654.56	2930.44	2836.87	1741.87	1578.67	1988.81	2807.29	1769.79	0.665702	0.00143533	0.0217572	LOC107850430	NC_029988.1	100071641	100076705	+	2988	protein_coding	violaxanthin de-epoxidase%2C chloroplastic%2C transcript variant X2	-
107855736	27.0438	249.694	73.8424	18.1918	29.0503	20.9173	116.86	22.7198	2.36545	0.00144521	0.0218803	LOC107855736	NW_015961472.1	27055	31328	+	2199	protein_coding	rhamnogalacturonate lyase-like	-
107849686	169.379	110.975	84.8637	53.0595	50.6305	21.754	121.739	41.8146	1.53728	0.00144526	0.0218803	LOC107849686	NC_029988.1	7912293	7914634	-	2168	protein_coding	probably inactive leucine-rich repeat receptor-like protein kinase At5g48380	Pkinase_Tyr
107842735	249.087	267.034	542.246	147.809	134.461	163.155	352.789	148.475	1.24994	0.00144628	0.0218821	LOC107842735	NC_029985.1	174340650	174379083	-	1593	protein_coding	caldesmon-like	-
107863287	18.5036	75.1394	57.3105	16.6758	9.96009	10.877	50.3178	12.5043	2.01174	0.00145049	0.0219322	LOC107863287	NC_029979.1	58102062	58112523	-	1348	protein_coding	F-box protein PP2-A13-like	F-box
107862579	1622.63	890.112	1206.83	2358.12	2344.77	2444.81	1239.86	2382.57	-0.942854	0.00145462	0.0219809	LOC107862579	NC_029979.1	20435135	20443274	-	4251	protein_coding	DEAD-box ATP-dependent RNA helicase 20%2C transcript variant X2	DEAD
107859365	1.42336	42.7716	8.81701	0.757993	0.830008	0.836691	17.6707	0.80823	4.45813	0.00145621	0.0219912	LOC107859365	NC_029978.1	136137140	136140383	-	1153	protein_coding	ABA-inducible protein PHV A1-like	-
107855488	15461.9	11140.3	8120.46	6081.38	5411.65	6059.31	11574.2	5850.78	0.984146	0.00145864	0.0220141	LOC107855488	NW_015961390.1	379297	381775	+	2075	protein_coding	proline dehydrogenase 2%2C mitochondrial-like%2C transcript variant X1	-
novel.2446	1.42336	30.0557	7.71488	0	0	0.836691	13.0647	0.278897	5.50357	0.00146559	0.0221053	-	NC_029980.1	207428785	207438567	-	339	-	-	-
107858539	79.7079	108.663	83.7616	168.274	162.681	176.542	90.7108	169.166	-0.896702	0.00147075	0.0221673	LOC107858539	NC_029978.1	60630693	60632698	-	1313	lncRNA	uncharacterized LOC107858539	-
107867475	455.474	23.1198	278.838	42.4476	13.2801	55.2216	252.477	36.9831	2.7703	0.00147288	0.0221673	LOC107867475	NC_029980.1	25890823	25898954	+	1326	protein_coding	RNA-binding protein 24-B-like	RRM_1
107853746	28.4671	0	109.11	1.51599	0	3.34676	45.8592	1.62092	4.82544	0.0014729	0.0221673	LOC107853746	NC_029977.1	30270587	30271509	+	923	protein_coding	glycine-rich cell wall structural protein 1.0-like	-
107838799	28.4671	285.53	103.6	33.3517	20.7502	29.2842	139.199	27.7953	2.32544	0.00147337	0.0221673	LOC107838799	NC_029984.1	2339371	2346491	-	976	protein_coding	probable peroxygenase 5	-
107875709	2137.88	2513.12	1584.86	3721.74	4493.66	3386.09	2078.62	3867.16	-0.895729	0.00147436	0.0221685	LOC107875709	NC_029982.1	10553357	10555672	-	2282	protein_coding	protein ETHYLENE INSENSITIVE 3-like	EIN3
novel.4680	42.7007	33.5237	34.1659	97.0231	63.9106	89.5259	36.7968	83.4865	-1.18802	0.00147876	0.0222209	-	NC_029985.1	36013858	36018721	-	2437	-	-	-
107849802	28.4671	308.649	57.3105	31.0777	14.1101	19.2439	131.476	21.4772	2.61382	0.00148145	0.0222475	LOC107849802	NC_029988.1	210664566	210665262	-	603	protein_coding	probable pectinesterase 8	-
107875616	315.985	350.265	342.761	210.722	164.341	211.683	336.337	195.582	0.782413	0.00148264	0.0222515	LOC107875616	NC_029982.1	8464199	8475369	+	1225	protein_coding	histone H2B.1-like%2C transcript variant X1	Histone
107868132	10730.7	4125.73	7214.52	3005.44	2191.22	3661.36	7356.97	2952.67	1.31702	0.00148402	0.0222584	LOC107868132	NC_029980.1	186443500	186446624	-	1381	protein_coding	ribulose bisphosphate carboxylase small chain 8B%2C chloroplastic-like	-
107866255	128.102	131.783	212.71	68.2193	78.8507	76.1388	157.532	74.403	1.0852	0.00149956	0.0224728	LOC107866255	NC_029977.1	6523108	6524611	-	1504	protein_coding	transcription factor TCP19-like	TCP
107844623	385.729	246.226	543.348	169.032	165.172	194.112	391.768	176.105	1.15399	0.00150017	0.0224728	LOC107844623	NC_029977.1	226458725	226466900	-	1535	protein_coding	ELMO domain-containing protein A-like	-
107869812	32.7372	36.9917	27.5531	62.9134	77.1907	76.1388	32.4273	72.081	-1.15314	0.00150242	0.0224927	LOC107869812	NC_029980.1	201014718	201015797	-	908	lncRNA	uncharacterized LOC107869812	-
107877768	939.415	1980.21	1944.15	704.933	705.506	811.59	1621.26	740.677	1.13063	0.00150817	0.0225649	LOC107877768	NC_029983.1	31292566	31298560	+	1127	protein_coding	axial regulator YABBY 5-like%2C transcript variant X1	YABBY
107868644	169.379	67.0474	153.195	34.8677	62.2506	22.5906	129.874	39.903	1.70159	0.00151275	0.0226194	LOC107868644	NC_029977.1	15175658	15179186	-	3420	protein_coding	receptor-like protein 12	LRRNT_2
novel.1911	42.7007	31.2117	27.5531	76.5573	63.9106	112.117	33.8218	84.1948	-1.32344	0.0015316	0.022887	-	NC_029979.1	227881390	227893391	-	708	-	-	-
107840987	271.861	178.022	211.608	398.704	370.183	440.936	220.497	403.274	-0.873438	0.00153525	0.0229275	LOC107840987	NC_029985.1	7655904	7660913	-	4035	protein_coding	probable glycosyltransferase At3g07620%2C transcript variant X1	-
107858887	13392.4	12757.5	9371.38	6799.95	7436.87	5312.15	11840.4	6516.32	0.861547	0.00153742	0.0229458	LOC107858887	NC_029978.1	110631367	110635524	+	2079	protein_coding	oxalate--CoA ligase	AMP-binding
107878495	1150.07	880.865	1024.98	530.595	453.184	686.923	1018.64	556.901	0.870931	0.00154196	0.0229993	LOC107878495	NC_029983.1	209702850	209709113	-	2564	protein_coding	mitogen-activated protein kinase 20	Pkinase
107878579	125.255	136.407	108.008	236.494	233.232	194.112	123.223	221.279	-0.845652	0.00154494	0.0230295	LOC107878579	NC_029983.1	213143277	213144837	-	1561	protein_coding	F-box protein At5g07610-like	F-box
107877544	180.766	224.262	175.238	310.019	330.343	365.634	193.422	335.332	-0.793001	0.00154608	0.0230324	LOC107877544	NC_029983.1	5639856	5650866	-	3615	protein_coding	DNA-directed RNA polymerase 3%2C chloroplastic%2C transcript variant X1	-
107859538	106.752	130.627	176.34	46.2376	80.5107	40.9978	137.906	55.9154	1.30529	0.0015502	0.02306	LOC107859538	NC_029978.1	140707414	140716946	+	2307	pseudogene	-	Pkinase_Tyr
novel.3637	7.11678	33.5237	15.4298	3.03197	2.49002	2.51007	18.6901	2.67736	2.80945	0.00155075	0.02306	-	NC_029983.1	117797564	117799976	+	892	-	-	-
107866339	7.11678	10.4039	7.71488	0.757993	0	0	8.41186	0.252664	4.86453	0.00155079	0.02306	LOC107866339	NC_029979.1	205814732	205815507	+	776	protein_coding	ethylene-responsive transcription factor ERF098-like	AP2
107843224	421.313	293.622	504.774	713.271	755.307	870.158	406.569	779.579	-0.939062	0.00155536	0.0231137	LOC107843224	NC_029985.1	237677529	237682719	+	989	protein_coding	solute carrier family 35 member F2-like	-
107876312	120.985	67.0474	85.9658	187.982	170.982	204.153	91.3328	187.705	-1.04488	0.00156843	0.0232937	LOC107876312	NC_029983.1	5839768	5847172	+	2109	protein_coding	LEAF RUST 10 DISEASE-RESISTANCE LOCUS RECEPTOR-LIKE PROTEIN KINASE-like 1.3	Pkinase_Tyr
107840355	207.81	293.622	186.259	454.038	459.824	384.041	229.23	432.634	-0.915943	0.00157119	0.0233101	LOC107840355	NC_029984.1	147380658	147385707	-	951	protein_coding	CCG-binding protein 1-like	-
107878595	108.175	33.5237	549.961	31.8357	45.6504	35.141	230.553	37.5424	2.6197	0.00157146	0.0233101	LOC107878595	NC_029983.1	213625795	213626996	+	1202	protein_coding	epidermis-specific secreted glycoprotein EP1-like	B_lectin
107872895	3704.99	2322.38	2256.05	1347.71	1162.01	1647.44	2761.14	1385.72	0.994396	0.00157296	0.0233181	LOC107872895	NC_029982.1	37946928	37948474	+	796	protein_coding	glycine cleavage system H protein%2C mitochondrial	-
107866364	122.409	1722.43	241.366	137.197	77.1907	128.014	695.4	114.134	2.60726	0.00157522	0.0233374	LOC107866364	NC_029979.1	217896235	217898175	-	1941	protein_coding	cation/calcium exchanger 1	Na_Ca_ex
107840563	424.16	389.569	347.17	657.938	568.555	783.142	386.966	669.878	-0.792489	0.00158167	0.0234186	LOC107840563	NC_029984.1	151476402	151477858	-	943	protein_coding	myb-related protein 308-like	Myb_DNA-binding
107847640	557.955	372.229	501.467	811.052	895.578	809.917	477.217	838.849	-0.814613	0.00158314	0.0234259	LOC107847640	NC_029977.1	252420901	252436524	-	1638	protein_coding	serine carboxypeptidase-like 12	Peptidase_S10
107860671	311.715	160.683	186.259	96.2651	50.6305	107.096	219.552	84.664	1.37244	0.0015841	0.0234259	LOC107860671	NC_029978.1	162008681	162012881	+	2532	protein_coding	probable galactinol--sucrose galactosyltransferase 5	-
novel.3218	11.3868	204.61	65.0254	17.4338	13.2801	13.387	93.6742	14.7003	2.6732	0.0015866	0.0234486	-	NC_029982.1	188893007	188893476	+	470	-	-	-
107850294	6756.67	3855.23	3146.57	9750.06	10262.2	9508.15	4586.15	9840.14	-1.10157	0.00159504	0.0235589	LOC107850294	NC_029977.1	293644359	293649338	+	1075	protein_coding	kirola-like	-
novel.7233	296.058	159.527	301.982	541.207	446.544	654.292	252.522	547.348	-1.11676	0.00159631	0.0235634	-	NW_015961797.1	943320	957889	+	2864	-	-	-
107871419	31.3138	13.8719	8.81701	2.27398	2.49002	3.34676	18.0009	2.70359	2.72441	0.00160143	0.0236245	LOC107871419	NC_029981.1	216311224	216315593	+	2040	protein_coding	probable WRKY transcription factor 26	WRKY
107874724	115.292	243.914	159.808	66.7034	27.3902	79.4856	173.005	57.8597	1.58112	0.00160417	0.0236505	LOC107874724	NC_029982.1	16575197	16578175	-	1925	protein_coding	protein NRT1/ PTR FAMILY 2.11-like	-
novel.5842	160.839	94.7912	122.336	37.1416	35.6903	72.7921	125.989	48.5413	1.37529	0.00160868	0.0237026	-	NC_029988.1	3426964	3430484	+	1017	-	-	-
107864181	7923.82	8543.92	7548.46	5310.5	5574.33	5230.99	8005.4	5371.94	0.575532	0.0016206	0.0238637	LOC107864181	NC_029979.1	238894621	238898354	-	1335	protein_coding	malate dehydrogenase	-
107874776	167.956	1765.2	422.114	165.242	95.4509	204.153	785.089	154.949	2.34133	0.00162248	0.0238769	LOC107874776	NC_029982.1	20658493	20662499	-	1758	protein_coding	probable polygalacturonase At1g80170	-
107853630	1416.24	431.184	1286.18	322.905	243.192	483.607	1044.53	349.901	1.57769	0.00163305	0.0240178	LOC107853630	NW_015960939.1	60347	62653	-	1169	protein_coding	GDSL esterase/lipase At5g45670-like	Lipase_GDSL
107841115	155.146	387.257	358.191	149.325	104.581	97.0561	300.198	116.987	1.3606	0.00164018	0.0241054	LOC107841115	NC_029977.1	189703675	189705323	+	1649	protein_coding	basic 7S globulin-like	-
107843692	130.949	825.377	246.876	123.553	81.3407	96.2194	401.067	100.371	1.99888	0.00164131	0.0241054	LOC107843692	NC_029977.1	222753157	222757240	-	868	protein_coding	glycine-rich protein A3%2C transcript variant X1	-
107841820	24.197	71.6714	80.4552	14.4019	22.4102	12.5504	58.7745	16.4541	1.84372	0.00164199	0.0241054	LOC107841820	NC_029985.1	4928652	4930250	-	746	protein_coding	E3 ubiquitin ligase BIG BROTHER-related-like	-
novel.6690	2.84671	2.31198	1.10213	19.7078	22.4102	8.36691	2.08694	16.8283	-3.04237	0.00164322	0.0241089	-	NW_015960950.1	253360	254668	+	1191	-	-	-
107852116	539.452	255.474	385.744	784.522	795.977	890.239	393.557	823.579	-1.06677	0.00164986	0.0241916	LOC107852116	NW_015960394.1	1043296	1051188	-	5831	protein_coding	splicing factor U2af small subunit B-like%2C transcript variant X5	RRM_1
107840973	66.8977	417.312	133.357	59.1234	37.3503	54.3849	205.856	50.2862	2.03429	0.00165118	0.0241963	LOC107840973	NC_029985.1	7215876	7223924	+	1721	protein_coding	uncharacterized LOC107840973	-
107843855	270.438	160.683	156.502	404.01	393.424	373.164	195.874	390.199	-0.99803	0.00165413	0.0242249	LOC107843855	NC_029986.1	201465423	201470061	+	3789	protein_coding	uncharacterized LOC107843855	-
107838949	290.364	451.992	331.74	206.932	194.222	171.522	358.032	190.892	0.908093	0.00165835	0.024272	LOC107838949	NC_029984.1	62011234	62012877	-	1644	protein_coding	uncharacterized LOC107838949	-
novel.1960	14.2336	24.2758	19.8383	69.7353	53.1205	40.1611	19.4492	54.339	-1.47429	0.00165949	0.024274	-	NC_029979.1	250749842	250765511	-	999	-	-	-
107858302	7.11678	25.4318	11.0213	0	2.49002	0	14.5233	0.830008	4.15729	0.001662	0.0242961	LOC107858302	NC_029978.1	150186795	150187175	+	381	protein_coding	uncharacterized LOC107858302	-
107846884	9.96349	28.8998	18.7361	5.30595	0.830008	1.67338	19.1998	2.60311	2.86968	0.00166319	0.0242989	LOC107846884	NC_029987.1	4450755	4452330	+	1576	protein_coding	uncharacterized protein At1g08160	-
107872239	11.3868	56.6435	26.451	2.27398	7.47007	6.69352	31.4938	5.47919	2.53632	0.0016756	0.0244653	LOC107872239	NC_029981.1	164912	165771	-	860	protein_coding	probable calcium-binding protein CML36	-
107851293	536.605	477.424	315.208	763.299	986.879	819.12	443.079	856.433	-0.951875	0.00168133	0.024521	LOC107851293	NC_029988.1	17512578	17518313	-	1702	protein_coding	uncharacterized protein At1g01500-like%2C transcript variant X2	-
107851047	88.248	42.7716	114.621	15.1599	18.2602	38.4878	81.8803	23.9693	1.77493	0.00168192	0.024521	LOC107851047	NC_029988.1	178787342	178789973	-	2632	protein_coding	leucine-rich repeat extensin-like protein 4	-
107877777	298.905	122.535	156.502	463.134	400.064	507.871	192.647	457.023	-1.24968	0.00168244	0.024521	LOC107877777	NC_029983.1	32451398	32452592	-	1195	protein_coding	uncharacterized LOC107877777	-
107852732	37.0072	38.1477	33.0638	15.1599	10.7901	13.387	36.0729	13.1123	1.45647	0.00168646	0.0245433	LOC107852732	NW_015960619.1	2109	2861	+	753	protein_coding	uncharacterized LOC107852732	-
107849573	27.0438	261.254	139.97	28.0457	24.0702	39.3245	142.756	30.4801	2.22997	0.00168659	0.0245433	LOC107849573	NC_029988.1	181667641	181676123	+	1545	protein_coding	WAT1-related protein At1g68170-like	DUF6
107872610	31.3138	109.819	70.5361	19.7078	24.0702	21.754	70.5563	21.844	1.69722	0.00168708	0.0245433	LOC107872610	NC_029981.1	192103225	192104178	+	954	protein_coding	putative glycine-rich cell wall structural protein 1	-
107879929	14.2336	120.223	100.293	18.9498	14.1101	15.8971	78.25	16.319	2.26463	0.00168803	0.0245433	LOC107879929	NC_029984.1	142510209	142511916	-	1063	protein_coding	probable xyloglucan endotransglucosylase/hydrolase protein 10	-
107846007	398.539	366.449	236.957	155.389	189.242	164.828	333.982	169.819	0.974602	0.00168947	0.0245494	LOC107846007	NC_029986.1	147204281	147205894	+	1614	protein_coding	lactosylceramide 4-alpha-galactosyltransferase-like	Gly_transf_sug
107865255	34.1605	15.0279	24.2468	56.8495	58.9305	80.3223	24.4784	65.3674	-1.42861	0.00170416	0.024748	LOC107865255	NC_029977.1	4163637	4185594	+	3571	protein_coding	ubiquitin receptor RAD23c-like%2C transcript variant X3	RVT_2
107853847	54.0875	42.7716	73.8424	25.0138	22.4102	20.9173	56.9005	22.7804	1.3215	0.00170517	0.024748	LOC107853847	NW_015960984.1	10382	16670	-	1775	protein_coding	serine carboxypeptidase II-2-like	Peptidase_S10
107874648	233.43	337.549	232.549	137.197	146.081	149.768	267.843	144.349	0.892879	0.00170754	0.0247676	LOC107874648	NC_029982.1	8855495	8856922	-	1129	protein_coding	uncharacterized LOC107874648	-
107874819	58.3576	32.3677	73.8424	23.4978	13.2801	17.5705	54.8559	18.1161	1.59557	0.00172266	0.0249718	LOC107874819	NC_029982.1	28578855	28579678	+	824	protein_coding	uncharacterized LOC107874819	-
107850886	893.867	1217.26	1174.87	647.326	638.276	686.923	1095.33	657.508	0.736895	0.00172582	0.0250027	LOC107850886	NC_029988.1	223659535	223667013	-	2207	protein_coding	methylenetetrahydrofolate reductase 2-like	-
107839528	170.803	242.758	336.148	104.603	117.031	130.524	249.903	117.386	1.09278	0.00172992	0.0250471	LOC107839528	NC_029984.1	129926653	129933387	+	1503	protein_coding	tryptophan synthase alpha chain-like	-
107855072	1387.77	20678.4	3819.97	1713.06	1219.28	1763.74	8628.7	1565.36	2.46266	0.00173796	0.0251111	LOC107855072	NW_015961325.1	76854	78832	-	1531	protein_coding	transmembrane protein 45B-like%2C transcript variant X1	-
107846198	11.3868	1.15599	8.81701	39.4156	23.2402	39.3245	7.11995	33.9934	-2.27703	0.00173936	0.0251111	LOC107846198	NC_029987.1	11856396	11857703	+	876	protein_coding	putative disease resistance protein At3g14460	-
107869746	109.598	1008.02	211.608	115.215	66.4006	90.3626	443.077	90.6594	2.28925	0.00173947	0.0251111	LOC107869746	NC_029980.1	176313140	176315587	-	657	protein_coding	heavy metal-associated isoprenylated plant protein 21-like	HMA
107856188	734.451	816.129	1727.03	398.704	467.294	508.708	1092.54	458.235	1.25407	0.00173949	0.0251111	LOC107856188	NW_015961580.1	743	1662	-	680	protein_coding	histone H2A	Histone
novel.2019	1.42336	0	2.20425	14.4019	17.4302	10.0403	1.2092	13.9574	-3.52763	0.00173952	0.0251111	-	NC_029980.1	11938754	11939719	+	966	-	-	-
107875581	906.677	777.981	605.067	445.7	459.824	372.327	763.242	425.95	0.840618	0.00174747	0.0252083	LOC107875581	NC_029982.1	7591050	7591969	+	920	protein_coding	uncharacterized LOC107875581	-
107855426	75.4378	46.2396	52.902	115.215	112.881	131.36	58.1932	119.819	-1.04952	0.00174834	0.0252083	LOC107855426	NW_015961388.1	2347032	2350737	+	2331	protein_coding	uncharacterized LOC107855426	-
107851048	582.152	408.065	255.693	960.377	1088.14	753.858	415.303	934.125	-1.17092	0.0017517	0.0252408	LOC107851048	NC_029988.1	201852099	201856616	-	1919	protein_coding	uncharacterized LOC107851048	-
107873081	407.08	343.329	451.872	259.233	223.272	219.213	400.76	233.906	0.776504	0.00175267	0.0252408	LOC107873081	NC_029982.1	63415894	63422446	-	1456	protein_coding	5'-nucleotidase SurE-like	-
107848457	45.5474	114.443	60.6169	27.2877	29.0503	19.2439	73.5358	25.194	1.5481	0.00175529	0.0252635	LOC107848457	NC_029987.1	213977766	213979839	-	1548	protein_coding	uncharacterized LOC107848457	-
107861944	19.927	12.7159	11.0213	40.9316	37.3503	43.5079	14.5547	40.5966	-1.4983	0.00176064	0.0253254	LOC107861944	NC_029979.1	5992383	5994656	+	2274	protein_coding	pentatricopeptide repeat-containing protein At1g52640%2C mitochondrial%2C transcript variant X1	PPR
107864287	52.6641	141.031	66.1275	238.01	216.632	208.336	86.6075	220.993	-1.34793	0.0017619	0.0253285	LOC107864287	NC_029979.1	244316309	244318157	+	1849	protein_coding	F-box/kelch-repeat protein At3g06240-like	F-box
107848329	505.291	497.076	454.076	312.293	265.602	320.452	485.481	299.449	0.696586	0.00176785	0.025399	LOC107848329	NC_029987.1	203911097	203916274	-	2133	protein_coding	ninja-family protein AFP3-like	-
107860160	241.97	151.435	278.838	107.635	94.6209	118.81	224.081	107.022	1.06592	0.00176953	0.025408	LOC107860160	NC_029978.1	152863689	152868620	-	1567	protein_coding	uncharacterized protein At3g49720%2C transcript variant X2	-
107856948	933.721	713.246	397.867	1595.57	1563.73	1345.4	681.611	1501.57	-1.14035	0.00177628	0.0254898	LOC107856948	NC_029977.1	193793733	193794567	-	835	protein_coding	uncharacterized LOC107856948	-
107854099	115.292	83.2313	103.6	53.8175	48.9704	48.5281	100.708	50.4387	0.994466	0.00177837	0.0255047	LOC107854099	NW_015961071.1	131320	133383	+	2064	protein_coding	inactive tetrahydrocannabinolic acid synthase-like	FAD_binding_4
107865938	35.5839	79.7633	96.9871	28.0457	20.7502	24.264	70.7781	24.3533	1.5441	0.0017807	0.0255231	LOC107865938	NC_029979.1	15732083	15733294	+	1212	protein_coding	protein MIZU-KUSSEI 1	-
107874439	25.6204	24.2758	15.4298	54.5755	54.7805	51.0381	21.7753	53.4647	-1.30548	0.00178191	0.0255252	LOC107874439	NC_029982.1	201280022	201280756	-	735	protein_coding	uncharacterized LOC107874439	-
107867328	666.13	609.207	574.208	378.238	415.834	381.531	616.515	391.868	0.653237	0.00178537	0.0255597	LOC107867328	NC_029980.1	15313269	15319303	+	1964	protein_coding	serine hydroxymethyltransferase%2C mitochondrial-like	SHMT
107864017	29.8905	9.24792	5.51063	1.51599	1.66002	0	14.883	1.05867	3.78745	0.00178807	0.0255833	LOC107864017	NC_029979.1	230895399	230896273	+	875	protein_coding	translocator protein homolog	-
107852193	8.54013	36.9917	9.91913	2.27398	3.32003	0.836691	18.4837	2.14357	3.11138	0.001793	0.0256253	LOC107852193	NC_029977.1	2597209	2598706	-	1498	protein_coding	uncharacterized LOC107852193	-
107843919	4057.99	4195.09	3421	2429.37	2664.32	2354.45	3891.36	2482.71	0.648292	0.00179313	0.0256253	LOC107843919	NC_029986.1	202941550	202946622	-	2797	protein_coding	calcium-dependent protein kinase 32-like	Pkinase
107842704	263.321	204.61	316.31	145.535	140.271	138.891	261.414	141.566	0.885045	0.00179946	0.0257007	LOC107842704	NC_029977.1	211759440	211766705	+	1804	protein_coding	lipase-like%2C transcript variant X3	Lipase_3
107854485	31.3138	205.766	49.5957	25.0138	19.9202	15.0604	95.5586	19.9981	2.25742	0.00180498	0.0257644	LOC107854485	NC_029977.1	49286398	49288086	-	1689	protein_coding	uncharacterized LOC107854485	-
107875834	7014.29	69964	19001.8	7871.75	4658	8309.17	31993.3	6946.31	2.20345	0.00180668	0.0257734	LOC107875834	NC_029982.1	13146111	13147775	-	847	protein_coding	CASP-like protein 4D1	-
107868284	1162.88	1641.51	1483.46	749.655	907.198	518.748	1429.28	725.2	0.979045	0.00180932	0.0257944	LOC107868284	NC_029977.1	13600788	13603653	-	1678	protein_coding	FAD-dependent urate hydroxylase-like	FAD_binding_3
107860415	130.949	142.187	85.9658	238.01	220.782	233.437	119.7	230.743	-0.949244	0.00181047	0.0257944	LOC107860415	NC_029977.1	225985151	225985786	+	636	protein_coding	uncharacterized LOC107860415	-
107844406	7.11678	6.93594	17.634	0.757993	0.830008	0	10.5622	0.529333	4.31024	0.00181134	0.0257944	LOC107844406	NC_029986.1	143052806	143055082	-	1236	protein_coding	uncharacterized LOC107844406	-
107841773	136.642	94.7912	163.115	61.3974	52.2905	70.282	131.516	61.3233	1.10092	0.00181282	0.0258002	LOC107841773	NC_029985.1	13109599	13130544	-	2523	protein_coding	beta-amyrin synthase-like%2C transcript variant X2	-
107867616	817.006	812.661	572.003	402.494	449.864	407.468	733.89	419.942	0.804863	0.00181589	0.0258287	LOC107867616	NC_029980.1	39061826	39064669	+	745	protein_coding	leiomodin-2%2C transcript variant X1	-
107868277	634.816	433.496	524.612	899.737	1168.65	845.894	530.975	971.427	-0.87226	0.00181973	0.0258682	LOC107868277	NC_029980.1	205132493	205141616	+	2475	protein_coding	probable metal-nicotianamine transporter YSL7	OPT
107864521	61.2043	167.619	50.6978	21.9818	37.3503	18.4072	93.1735	25.9131	1.84828	0.00182126	0.0258748	LOC107864521	NC_029977.1	2534531	2537049	-	1642	protein_coding	1-aminocyclopropane-1-carboxylate synthase-like	Aminotran_1_2
107838729	25.6204	27.7438	20.9404	59.1234	77.1907	47.6914	24.7682	61.3352	-1.31051	0.0018245	0.0259056	LOC107838729	NC_029984.1	947189	952261	+	3485	protein_coding	cysteine-rich receptor-like protein kinase 2	Pkinase_Tyr
107847664	206.387	208.078	224.834	338.065	343.623	338.86	213.099	340.183	-0.674042	0.00182684	0.025918	LOC107847664	NC_029987.1	11309591	11313735	+	4145	protein_coding	elongation factor-like GTPase 1	GTP_EFTU_D2
107867362	149.452	93.6352	93.6807	218.302	204.182	240.967	112.256	221.15	-0.98369	0.00182758	0.025918	LOC107867362	NC_029980.1	16558134	16559961	+	1739	protein_coding	AT-hook motif nuclear-localized protein 17	-
novel.3449	17.0803	41.6156	56.2084	10.6119	10.7901	2.51007	38.3014	7.97069	2.26669	0.00182941	0.025918	-	NC_029982.1	132157922	132159256	-	1241	-	-	-
107877913	987.809	923.636	837.616	1362.87	1413.5	1420.7	916.353	1399.02	-0.610896	0.00182966	0.025918	LOC107877913	NC_029983.1	85707429	85724374	+	3200	protein_coding	uncharacterized LOC107877913	DENN
novel.1585	1.42336	0	0	10.6119	7.47007	13.387	0.474452	10.4897	-4.58547	0.00183942	0.0260411	-	NC_029979.1	248431996	248432436	+	441	-	-	-
107868222	206.387	435.808	264.51	153.115	126.161	131.36	302.235	136.879	1.14374	0.00184368	0.0260715	LOC107868222	NC_029977.1	13469797	13474790	-	1300	protein_coding	probable enoyl-CoA hydratase 2%2C mitochondrial%2C transcript variant X1	ECH
107877050	18482.3	10526.4	7074.55	27511.3	30940.2	25816.1	12027.8	28089.2	-1.22371	0.00184372	0.0260715	LOC107877050	NC_029977.1	96702221	96706929	-	2899	protein_coding	uncharacterized LOC107877050%2C transcript variant X3	YTH
107859982	1010.58	583.775	612.782	1383.34	1393.58	1479.27	735.713	1418.73	-0.948429	0.00184593	0.0260875	LOC107859982	NC_029978.1	149592495	149598247	+	3030	protein_coding	U-box domain-containing protein 5-like%2C transcript variant X3	U-box
107869650	4107.8	2730.45	3802.33	1851.02	1272.4	2202.17	3546.86	1775.2	0.998488	0.00184856	0.0261094	LOC107869650	NC_029980.1	63847116	63848847	-	846	protein_coding	gibberellin-regulated protein 9-like%2C transcript variant X1	-
107861433	12.8102	21.9638	49.5957	4.54796	3.32003	8.36691	28.1232	5.41163	2.38894	0.00185206	0.0261377	LOC107861433	NC_029978.1	158299688	158304185	+	1840	protein_coding	putative G3BP-like protein%2C transcript variant X1	RRM_1
novel.984	150.876	150.279	100.293	247.864	261.452	236.783	133.816	248.7	-0.896877	0.00185343	0.0261377	-	NC_029978.1	13782764	13786828	-	4065	-	-	-
107849623	27.0438	31.2117	88.1701	10.6119	2.49002	15.0604	48.8085	9.38745	2.38177	0.00185409	0.0261377	LOC107849623	NC_029988.1	199500738	199504954	+	1265	protein_coding	GRF1-interacting factor 1-like%2C transcript variant X2	SSXT
107861782	5.69342	10.4039	18.7361	1.51599	0	0.836691	11.6112	0.784225	3.8725	0.00185488	0.0261377	LOC107861782	NC_029979.1	3393774	3396838	-	2242	protein_coding	uncharacterized LOC107861782%2C transcript variant X1	-
107842092	8.54013	27.7438	38.5744	4.54796	4.15004	5.85683	24.9528	4.85161	2.37464	0.00185964	0.0261896	LOC107842092	NC_029985.1	171730095	171734156	-	942	protein_coding	uncharacterized LOC107842092	-
107845390	66.8977	36.9917	51.7999	103.087	124.501	106.26	51.8964	111.283	-1.10734	0.001861	0.0261936	LOC107845390	NC_029986.1	9913027	9919661	+	4696	protein_coding	pentatricopeptide repeat-containing protein At1g11710%2C mitochondrial%2C transcript variant X2	PPR
novel.1462	78.2845	72.8274	105.804	31.0777	17.4302	46.018	85.6387	31.5086	1.44423	0.00186591	0.0262472	-	NC_029979.1	145786780	145803728	+	1126	-	PF05631:Sugar-tranasporters, 12 TM	-
107877010	5.69342	1.15599	48.4935	0.757993	0	0.836691	18.4476	0.531561	5.11354	0.00186699	0.0262472	LOC107877010	NC_029983.1	5174202	5175071	-	613	protein_coding	flower-specific defensin-like	-
107872850	82.5546	282.062	128.949	62.1554	58.9305	41.8345	164.522	54.3068	1.60041	0.00187011	0.0262655	LOC107872850	NC_029982.1	33484671	33507047	+	2548	protein_coding	lactation elevated protein 1%2C transcript variant X3	AFG1_ATPase
107863275	508.138	203.454	352.68	851.226	703.016	876.852	354.757	810.365	-1.19322	0.0018723	0.0262655	LOC107863275	NC_029979.1	55513528	55517511	-	2574	lncRNA	uncharacterized LOC107863275%2C transcript variant X4	-
107848352	519.525	250.85	476.118	202.384	171.812	202.479	415.498	192.225	1.11121	0.00187268	0.0262655	LOC107848352	NC_029987.1	206628305	206632230	+	1694	protein_coding	ACT domain-containing protein ACR4-like	ACT
107852645	1881.68	6290.9	4790.94	1694.11	1821.87	1371.34	4321.17	1629.11	1.40745	0.00187274	0.0262655	LOC107852645	NW_015960565.1	16434	18366	+	532	protein_coding	GDSL esterase/lipase At2g38180-like	-
107868602	72.5911	509.792	157.604	64.4294	55.6105	61.9151	246.662	60.6517	2.02489	0.0018737	0.0262655	LOC107868602	NC_029980.1	9422060	9427145	+	2457	protein_coding	subtilisin-like protease SBT1.9	Peptidase_S8
107838929	27.0438	157.215	163.115	18.9498	41.5004	12.5504	115.791	24.3335	2.2537	0.00187793	0.0263095	LOC107838929	NC_029977.1	167036654	167038366	+	1713	protein_coding	chitinase 2-like	-
107848582	37.0072	39.3037	134.459	14.4019	22.4102	17.5705	70.2568	18.1275	1.96013	0.00188682	0.0264187	LOC107848582	NC_029987.1	62489809	62491879	+	936	protein_coding	ubiquitin-conjugating enzyme E2 20-like	UQ_con
107842013	7.11678	191.894	40.7787	14.4019	9.13008	6.69352	79.9299	10.0752	2.98771	0.00189446	0.0265104	LOC107842013	NC_029985.1	94973002	94974637	-	1636	protein_coding	adenylate isopentenyltransferase 3%2C chloroplastic	IPPT
107839597	288.941	267.034	877.292	136.439	152.721	186.582	477.756	158.581	1.59204	0.00190306	0.0266154	LOC107839597	NC_029984.1	131760906	131761753	-	768	protein_coding	histone H2A.1-like	Histone
107853807	603.503	323.677	325.127	845.162	869.018	857.608	417.436	857.263	-1.04002	0.00190684	0.0266529	LOC107853807	NW_015960975.1	13469	16824	+	2424	protein_coding	uncharacterized LOC107853807%2C transcript variant X3	-
107878523	2384.12	2034.54	2019.09	1358.32	1162.84	1471.74	2145.92	1330.97	0.688905	0.00191039	0.0266871	LOC107878523	NC_029983.1	210695143	210697126	+	842	protein_coding	translation initiation factor IF-2%2C chloroplastic-like	-
107854965	492.481	288.998	443.055	212.238	144.421	228.417	408.178	195.025	1.06468	0.00191349	0.026715	LOC107854965	NW_015961310.1	1853	3942	+	529	protein_coding	glycine cleavage system H protein%2C mitochondrial-like	-
107870749	5.69342	8.09193	8.81701	27.2877	20.7502	35.141	7.53412	27.7263	-1.86563	0.00192263	0.0268272	LOC107870749	NC_029981.1	96705282	96709685	+	2464	protein_coding	uncharacterized LOC107870749%2C transcript variant X4	-
107840620	143.759	116.755	100.293	209.206	232.402	209.173	120.269	216.927	-0.855028	0.00192719	0.0268752	LOC107840620	NC_029984.1	152473797	152477244	-	3448	protein_coding	group II intron-encoded protein LtrA	-
107863780	32.7372	18.4958	85.9658	9.8539	7.47007	13.387	45.7329	10.237	2.164	0.00193415	0.0269569	LOC107863780	NC_029979.1	194866987	194867604	-	618	protein_coding	histone H2B.2-like	Histone
107861895	159.416	90.1672	433.135	62.9134	24.9002	79.4856	227.573	55.7664	2.02957	0.00193662	0.0269745	LOC107861895	NC_029979.1	5034486	5036807	-	1154	protein_coding	gibberellin 3-beta-dioxygenase 1-like	2OG-FeII_Oxy
107840795	64.051	636.951	176.34	57.6074	22.4102	82.8324	292.447	54.2833	2.43028	0.00193765	0.0269745	LOC107840795	NC_029985.1	1001552	1006248	-	2706	protein_coding	monogalactosyldiacylglycerol synthase 2%2C chloroplastic-like	-
107863171	44.124	159.527	61.719	23.4978	29.0503	26.7741	88.4566	26.4407	1.7457	0.00194448	0.0270541	LOC107863171	NC_029979.1	45538550	45541820	-	1028	protein_coding	protein CURVATURE THYLAKOID 1A%2C chloroplastic-like	-
107866964	11.3868	24.2758	59.5148	7.57993	3.32003	6.69352	31.7258	5.86449	2.44045	0.00194696	0.027073	LOC107866964	NC_029980.1	4889513	4892867	+	1586	protein_coding	omega-hydroxypalmitate O-feruloyl transferase	-
107862012	1300.95	20370.9	3401.16	1577.38	1101.42	1776.29	8357.66	1485.03	2.49262	0.00195935	0.0272297	LOC107862012	NC_029979.1	7068709	7071768	-	1815	protein_coding	flotillin-like protein 3	-
107879898	2.84671	20.8078	2.20425	0	0	0	8.6196	0	5.86347	0.00197323	0.0274068	LOC107879898	NC_029984.1	140700001	140701448	-	1448	pseudogene	-	-
107859662	24.197	167.619	47.3914	10.6119	24.9002	5.02014	79.7357	13.5108	2.56398	0.00197977	0.027482	LOC107859662	NC_029978.1	143040754	143041855	-	1102	protein_coding	protein YLS9-like	-
107856433	44.124	4.62396	25.3489	91.7171	84.6608	129.687	24.699	102.022	-2.05812	0.00198588	0.0275509	LOC107856433	NW_015961643.1	178454	181656	-	3009	protein_coding	putative late blight resistance protein homolog R1B-17	NB-ARC
107861350	19.927	93.6352	62.8212	12.1279	16.6002	17.5705	58.7945	15.4328	1.93685	0.00198732	0.0275551	LOC107861350	NC_029978.1	151619078	151621060	+	830	protein_coding	heavy metal-associated isoprenylated plant protein 21	HMA
107873280	101.058	292.466	204.995	76.5573	76.3607	81.9957	199.506	78.3045	1.3517	0.00199843	0.0276934	LOC107873280	NC_029982.1	121859714	121865639	+	3934	protein_coding	protein SMAX1-LIKE 7-like	-
107856207	66.8977	252.006	227.038	50.0275	38.1803	77.8122	181.98	55.34	1.71994	0.00200536	0.0277734	LOC107856207	NW_015961588.1	123476	125367	-	773	protein_coding	peptide methionine sulfoxide reductase B5	-
107859857	46.9707	329.457	169.727	47.7535	43.1604	51.0381	182.052	47.3174	1.94572	0.00201792	0.0279025	LOC107859857	NC_029978.1	147290366	147294161	+	1268	protein_coding	L-ascorbate peroxidase 3%2C peroxisomal-like%2C transcript variant X2	-
107853587	427.007	531.756	747.241	328.211	241.532	294.515	568.668	288.086	0.981831	0.00201863	0.0279025	LOC107853587	NW_015960915.1	24161	27248	+	1186	protein_coding	uncharacterized LOC107853587%2C transcript variant X1	-
107867515	45.5474	334.081	134.459	43.2056	43.9904	40.9978	171.363	42.7313	2.00538	0.00201864	0.0279025	LOC107867515	NC_029980.1	28535712	28538295	-	1759	protein_coding	probable carbohydrate esterase At4g34215	-
novel.2464	14.2336	27.7438	25.3489	50.0275	63.0806	58.5683	22.4421	57.2255	-1.33591	0.00201929	0.0279025	-	NC_029980.1	214323435	214324932	-	1498	-	-	-
107839896	587.846	418.468	379.131	802.714	854.078	802.386	461.815	819.726	-0.829435	0.00202331	0.0279421	LOC107839896	NC_029984.1	137626018	137628650	-	2537	protein_coding	transcription factor TCP8-like	TCP
107879711	91.0947	46.2396	69.4339	140.229	132.801	181.562	68.9228	151.531	-1.14195	0.00203039	0.0280229	LOC107879711	NC_029984.1	107782287	107783644	-	664	protein_coding	uncharacterized LOC107879711	-
107863261	9.96349	61.2675	24.2468	7.57993	2.49002	5.85683	31.8259	5.30893	2.58449	0.00203147	0.0280229	LOC107863261	NC_029979.1	54725096	54730247	+	1778	protein_coding	uncharacterized protein At3g49055	-
107876065	28.4671	810.349	120.132	22.7398	75.5307	15.8971	319.649	38.0559	3.07118	0.00203332	0.0280284	LOC107876065	NC_029982.1	22373406	22375577	-	1784	protein_coding	putative receptor-like protein kinase At1g72540	Pkinase_Tyr
107866645	12.8102	53.1756	34.1659	7.57993	4.15004	10.0403	33.3839	7.25675	2.20871	0.00203418	0.0280284	LOC107866645	NC_029979.1	260160568	260161374	+	807	protein_coding	inactive protein RESTRICTED TEV MOVEMENT 1-like	-
novel.10	24.197	46.2396	38.5744	77.3153	85.4908	84.5058	36.337	82.4373	-1.17137	0.00203834	0.0280695	-	NC_029977.1	1913582	1915004	+	1423	-	-	-
107870540	2647.44	482.048	3446.35	519.225	356.073	787.326	2191.95	554.208	1.98371	0.0020398	0.0280695	LOC107870540	NC_029981.1	34578821	34587934	+	3935	protein_coding	histidine kinase 4	Response_reg
107862282	29.8905	67.0474	90.3743	17.4338	9.96009	25.9374	62.4374	17.7771	1.81809	0.00204064	0.0280695	LOC107862282	NC_029977.1	280038787	280047790	+	3515	protein_coding	ankyrin-3-like	-
107867550	21.3503	132.939	27.5531	14.4019	10.7901	10.0403	60.6141	11.7441	2.36895	0.00204888	0.0281669	LOC107867550	NC_029980.1	31303217	31308499	-	1724	protein_coding	2%2C3-bisphosphoglycerate-dependent phosphoglycerate mutase	-
107858707	81.1313	36.9917	93.6807	174.338	154.381	179.052	70.6012	169.257	-1.26264	0.00205024	0.0281696	LOC107858707	NC_029978.1	92658237	92665140	+	1517	lncRNA	uncharacterized LOC107858707%2C transcript variant X3	-
107866888	448.357	121.379	264.51	79.5892	54.7805	126.34	278.082	86.9033	1.6769	0.00205894	0.028273	LOC107866888	NC_029980.1	2677118	2680321	-	906	protein_coding	protein SPA%2C chloroplastic	-
107843079	29.8905	2.31198	41.8808	3.03197	0.830008	3.34676	24.6944	2.40291	3.35754	0.0020643	0.0283285	LOC107843079	NC_029985.1	232470829	232472215	+	1174	pseudogene	-	-
107862636	72.5911	92.4792	45.1872	144.019	161.021	148.931	70.0858	151.324	-1.11232	0.00206532	0.0283285	LOC107862636	NC_029979.1	22833975	22836800	-	2373	protein_coding	pentatricopeptide repeat-containing protein At5g50280%2C chloroplastic	-
107874681	9.96349	41.6156	38.5744	4.54796	0	6.69352	30.0512	3.74716	3.00695	0.0020722	0.0284069	LOC107874681	NC_029982.1	12067396	12069613	+	1141	protein_coding	thaumatin-like protein 1b	Thaumatin
107850326	1565.69	1464.64	1343.49	2141.33	2206.16	2212.21	1457.94	2186.57	-0.585023	0.00208025	0.028501	LOC107850326	NC_029988.1	7951345	7958134	+	4062	protein_coding	ankyrin repeat-containing protein At5g02620-like%2C transcript variant X4	-
107858655	4.27007	82.0753	19.8383	6.06394	0.830008	3.34676	35.3945	3.41357	3.3697	0.00208468	0.0285456	LOC107858655	NC_029978.1	84035310	84036810	+	1501	protein_coding	mitogen-activated protein kinase kinase kinase 1-like	Pkinase
107843794	79.7079	121.379	124.54	59.8814	48.9704	35.141	108.542	47.9976	1.17876	0.00209164	0.0286186	LOC107843794	NC_029986.1	200423890	200426636	+	1335	protein_coding	DNA-directed RNA polymerase II subunit RPB1-like%2C transcript variant X1	-
107844095	0	1.15599	2.20425	13.6439	19.9202	8.36691	1.12008	13.977	-3.55843	0.00209237	0.0286186	LOC107844095	NC_029986.1	2203437	2206524	-	2569	protein_coding	LRR receptor-like serine/threonine-protein kinase EFR	Pkinase
novel.1031	5.69342	4.62396	14.3276	39.4156	28.2203	28.4475	8.21501	32.0278	-1.9442	0.00209599	0.028652	-	NC_029978.1	65429091	65437527	-	8412	-	PF00078:Reverse transcriptase (RNA-dependent DNA polymerase)	RVT_1
107865075	3077.29	1962.87	2292.42	4299.33	4977.56	3906.51	2444.2	4394.47	-0.846587	0.00210099	0.0287041	LOC107865075	NC_029977.1	3712113	3721511	-	2378	protein_coding	glutamate--cysteine ligase%2C chloroplastic%2C transcript variant X1	-
107857302	59.7809	52.0196	170.83	30.3197	21.5802	32.6309	94.21	28.1769	1.74426	0.00210336	0.0287203	LOC107857302	NC_029977.1	272089092	272090122	-	774	protein_coding	early nodulin-like protein 3	Cu_bind_like
107848569	91.0947	286.686	201.689	67.4613	73.8707	76.9755	193.156	72.7692	1.41099	0.00210486	0.0287246	LOC107848569	NC_029987.1	1870087	1874823	+	626	protein_coding	glutaredoxin-C4	-
novel.1924	21.3503	16.1839	26.451	62.9134	44.8204	53.5482	21.3284	53.7607	-1.33281	0.0021074	0.028743	-	NC_029979.1	233874650	233903609	-	5064	-	-	-
107839535	85.4013	116.755	209.404	34.8677	18.2602	67.7719	137.187	40.2999	1.76992	0.00211106	0.0287768	LOC107839535	NC_029984.1	130472730	130476498	+	1267	protein_coding	uncharacterized LOC107839535	-
107844998	1.42336	68.2034	3.30638	0.757993	1.66002	0.836691	24.3111	1.0849	4.49417	0.00211394	0.0287998	LOC107844998	NC_029986.1	175608562	175610262	-	1701	protein_coding	molybdate transporter 1-like	-
107871256	2925	9125.39	3142.16	2107.98	1720.61	1582.18	5064.18	1803.59	1.48949	0.00212015	0.0288682	LOC107871256	NC_029981.1	206017606	206019996	-	1483	protein_coding	chalcone synthase 2	Chal_sti_synt_N
novel.7147	38.4306	0	12.1234	0.757993	0	0	16.8513	0.252664	5.85809	0.00212796	0.0289582	-	NW_015961648.1	37768	42216	-	971	-	PF02519:Auxin responsive protein	Auxin_inducible
107844777	157.992	287.842	155.4	84.8952	94.6209	97.8928	200.411	92.4696	1.11737	0.00213674	0.0290235	LOC107844777	NC_029986.1	14371759	14372951	-	479	protein_coding	uncharacterized LOC107844777	-
107864574	1091.71	8340.47	1960.68	1137.75	721.277	860.955	3797.62	906.659	2.06649	0.00213691	0.0290235	LOC107864574	NC_029977.1	2649366	2654514	-	1691	protein_coding	probable polygalacturonase	-
107842327	22.7737	9.24792	15.4298	46.2376	43.1604	43.5079	15.8171	44.302	-1.50358	0.00213711	0.0290235	LOC107842327	NC_029985.1	31708911	31711688	+	1182	lncRNA	uncharacterized LOC107842327	-
107853683	15.6569	24.2758	27.5531	6.82193	3.32003	6.69352	22.4953	5.61183	2.00699	0.00213755	0.0290235	LOC107853683	NC_029977.1	29213911	29214962	-	959	lncRNA	uncharacterized LOC107853683	zf-GRF
novel.1261	21.3503	17.3399	8.81701	44.7216	42.3304	46.018	15.8357	44.3566	-1.50348	0.00214434	0.0290994	-	NC_029979.1	10221597	10223630	+	1059	-	-	-
107843379	334.488	346.797	116.825	655.664	802.617	603.254	266.037	687.178	-1.37028	0.00215396	0.0292135	LOC107843379	NC_029986.1	162496042	162498216	+	2175	protein_coding	UDP-glycosyltransferase 73C3-like	UDPGT
107866792	492.481	399.973	357.089	689.015	742.857	655.129	416.514	695.667	-0.741538	0.00215544	0.0292172	LOC107866792	NC_029980.1	880007	884967	-	2379	protein_coding	WD repeat-containing protein LWD1%2C transcript variant X2	WD40
107876069	12.8102	54.3315	50.6978	12.1279	8.30008	7.53022	39.2798	9.31939	2.07993	0.00216238	0.0292816	LOC107876069	NC_029982.1	22454579	22456293	-	926	lncRNA	uncharacterized LOC107876069	-
107839644	31.3138	317.897	186.259	48.5115	27.3902	41.8345	178.49	39.2454	2.18636	0.00216261	0.0292816	LOC107839644	NC_029984.1	132629536	132631933	-	2231	protein_coding	putative pectinesterase/pectinesterase inhibitor 22	-
107846917	88.248	950.224	292.063	98.539	93.7909	103.75	443.512	98.6932	2.16855	0.00217273	0.0294022	LOC107846917	NC_029987.1	176561177	176564449	+	654	protein_coding	CLAVATA3/ESR (CLE)-related protein 25	-
107863174	1838.98	695.906	717.484	2579.45	4257.94	2208.86	1084.12	3015.42	-1.47636	0.0021752	0.0294192	LOC107863174	NC_029979.1	45701467	45708220	-	5132	protein_coding	ABC transporter C family member 10	ABC_tran
107846985	7.11678	18.4958	13.2255	0.757993	2.49002	1.67338	12.946	1.64047	3.00245	0.00218553	0.0295425	LOC107846985	NC_029987.1	35470567	35471279	+	713	protein_coding	zinc finger protein ZAT11-like	-
107874953	51.2408	52.0196	49.5957	15.9178	24.9002	23.4273	50.952	21.4151	1.25367	0.00219464	0.0296448	LOC107874953	NC_029982.1	63703931	63707296	-	909	lncRNA	uncharacterized LOC107874953	-
107862702	156.569	352.577	281.042	116.731	94.6209	134.707	263.396	115.353	1.19307	0.00219555	0.0296448	LOC107862702	NC_029979.1	25009089	25014844	-	2127	protein_coding	uncharacterized LOC107862702	-
novel.427	27.0438	26.5878	47.3914	79.5892	71.3806	86.1791	33.6743	79.0497	-1.22291	0.00220642	0.0297749	-	NC_029977.1	17045067	17133454	-	3106	-	-	-
107840530	3548.42	3531.55	3031.95	2014.74	1885.78	2410.51	3370.64	2103.68	0.680058	0.00221085	0.0298181	LOC107840530	NC_029984.1	150728735	150735165	-	1381	protein_coding	triosephosphate isomerase%2C chloroplastic	-
107875009	3992.51	1755.95	2957	1434.88	1309.75	1379.7	2901.82	1374.78	1.07756	0.00221419	0.0298466	LOC107875009	NC_029982.1	112865437	112866682	+	980	protein_coding	uncharacterized LOC107875009	GATA-N
107872860	51.2408	312.117	110.213	34.1097	42.3304	46.8547	157.857	41.0982	1.94374	0.00221621	0.0298572	LOC107872860	NC_029982.1	34867841	34870350	-	1883	pseudogene	-	p450
107878032	822.699	722.494	569.799	1256.75	1392.75	1054.23	704.997	1234.58	-0.809081	0.00221995	0.0298702	LOC107878032	NC_029983.1	144314203	144320249	+	2913	protein_coding	regulatory protein NPR3-like%2C transcript variant X3	BTB
107852847	495.328	313.273	364.804	697.353	717.127	667.679	391.135	694.053	-0.829088	0.00222038	0.0298702	LOC107852847	NW_015960668.1	102096	107872	-	2313	protein_coding	U-box domain-containing protein 10-like%2C transcript variant X3	U-box
novel.4157	11.3868	70.5154	47.3914	12.1279	4.98005	9.2036	43.0979	8.77051	2.29939	0.00222087	0.0298702	-	NC_029984.1	134603721	134608137	+	674	-	-	-
107867251	199.27	221.95	321.821	128.859	107.071	142.237	247.68	126.056	0.976196	0.00222446	0.0299018	LOC107867251	NC_029980.1	11640040	11651101	-	3795	pseudogene	-	-
107849627	14.2336	18.4958	25.3489	3.78996	5.81005	4.18345	19.3594	4.59449	2.08597	0.0022286	0.0299409	LOC107849627	NC_029988.1	38430608	38433946	+	1557	protein_coding	putative receptor-like protein kinase At1g72540	Pkinase_Tyr
107863921	807.042	3577.79	1722.62	704.175	638.276	723.737	2035.82	688.729	1.56378	0.00223091	0.0299553	LOC107863921	NC_029979.1	222724597	222731926	+	1901	protein_coding	uncharacterized LOC107863921	-
107859762	1779.19	1308.58	2278.09	955.071	1064.07	812.427	1788.62	943.856	0.922263	0.00223249	0.0299598	LOC107859762	NC_029978.1	144786342	144793039	-	2157	protein_coding	MLO-like protein 8	-
107854587	175.073	1090.1	455.178	177.37	139.441	171.522	573.45	162.778	1.81727	0.00224769	0.0301471	LOC107854587	NW_015961180.1	2585027	2590427	-	2849	protein_coding	uncharacterized LOC107854587%2C transcript variant X5	-
107849675	469.707	32.3677	191.77	54.5755	24.9002	51.8748	231.282	43.7835	2.39943	0.00225764	0.0302591	LOC107849675	NC_029988.1	179716945	179720502	+	2453	protein_coding	WD repeat-containing protein RUP2-like%2C transcript variant X1	WD40
107851998	51.2408	28.8998	49.5957	87.9272	104.581	91.1993	43.2454	94.5691	-1.13263	0.00226005	0.0302591	LOC107851998	NW_015960364.1	133075	135060	+	1986	protein_coding	uncharacterized LOC107851998	Glycos_transf_1
107851432	59.7809	38.1477	51.7999	106.119	96.2809	99.5662	49.9095	100.655	-1.0177	0.00226099	0.0302591	LOC107851432	NC_029988.1	223352089	223356811	-	3658	protein_coding	pentatricopeptide repeat-containing protein At4g01570-like%2C transcript variant X5	PPR
107840378	187.883	242.758	208.302	124.311	102.921	131.36	212.981	119.531	0.834443	0.00226103	0.0302591	LOC107840378	NC_029984.1	147940744	147945601	-	1239	protein_coding	plastid division protein PDV2	-
novel.6171	12.8102	3.46797	11.0213	27.2877	29.0503	48.5281	9.09981	34.9554	-1.95466	0.00226253	0.0302624	-	NC_029988.1	58429049	58429712	-	639	-	-	-
107853575	126.679	39.3037	79.3531	216.028	227.422	189.929	81.7784	211.126	-1.37408	0.00226626	0.0302795	LOC107853575	NW_015960908.1	10	1743	-	682	protein_coding	putative F-box protein PP2-B12	F-box
107862742	21.3503	293.622	42.9829	22.7398	21.5802	11.7137	119.318	18.6779	2.67597	0.0022663	0.0302795	LOC107862742	NC_029979.1	27009919	27011067	-	1149	protein_coding	protein YLS9	-
107878525	136.642	39.3037	105.804	18.1918	15.7701	42.6712	93.9166	25.5444	1.87784	0.00227091	0.0303034	LOC107878525	NC_029983.1	210838922	210840633	+	1712	protein_coding	serine/threonine-protein kinase WAG1-like	Pkinase
107870691	183.613	241.602	146.583	323.663	357.733	386.551	190.599	355.982	-0.90122	0.00227131	0.0303034	LOC107870691	NC_029981.1	76511248	76514426	+	1330	protein_coding	uncharacterized LOC107870691	-
107854200	587.846	529.444	778.101	382.028	328.683	374.001	631.797	361.571	0.805553	0.00227198	0.0303034	LOC107854200	NW_015961122.1	60891	69972	-	2099	protein_coding	BEL1-like homeodomain protein 9	POX
107840915	253.357	273.97	231.446	387.334	500.495	396.591	252.924	428.14	-0.759421	0.0022731	0.0303034	LOC107840915	NC_029985.1	5898615	5903503	+	2444	protein_coding	nuclear transcription factor Y subunit A-4-like%2C transcript variant X3	CBFB_NFYA
107872519	135.219	75.1394	175.238	45.4796	33.2003	66.0986	128.532	48.2595	1.41381	0.00227656	0.0303329	LOC107872519	NC_029981.1	152299270	152305958	-	1014	protein_coding	uncharacterized protein At4g00950-like	-
novel.5089	14.2336	20.8078	61.719	9.09591	2.49002	5.85683	32.2535	5.81426	2.47228	0.00227866	0.0303441	-	NC_029986.1	198617751	198665655	+	273	-	-	-
107873457	1115.91	16964.2	3176.33	1420.48	1051.62	1546.2	7085.46	1339.43	2.40326	0.00228778	0.0304488	LOC107873457	NC_029982.1	184707643	184717572	-	1775	protein_coding	vacuolar cation/proton exchanger 3-like	Na_Ca_ex
107871171	34.1605	114.443	103.6	35.6257	17.4302	22.5906	84.0678	25.2155	1.73915	0.00229026	0.0304651	LOC107871171	NC_029981.1	200989659	200992625	+	1429	protein_coding	WAT1-related protein At1g09380-like	DUF6
107860243	327.372	288.998	311.902	484.357	480.574	473.567	309.424	479.5	-0.632693	0.00229469	0.0305072	LOC107860243	NC_029978.1	154482750	154485546	+	1497	protein_coding	uncharacterized LOC107860243%2C transcript variant X2	-
107872419	1013.43	1738.61	718.586	2546.86	2830.33	2329.35	1156.87	2568.84	-1.15084	0.00230397	0.0306138	LOC107872419	NC_029977.1	44361371	44363344	+	1280	protein_coding	probable carboxylesterase 8	Abhydrolase_3
107871189	12.8102	2.31198	8.81701	27.2877	28.2203	40.9978	7.97973	32.1686	-2.03432	0.00231144	0.0306962	LOC107871189	NC_029981.1	201720435	201723813	-	3286	lncRNA	uncharacterized LOC107871189	-
107865900	27.0438	26.5878	17.634	7.57993	6.64006	1.67338	23.7552	5.29779	2.15358	0.0023155	0.0307334	LOC107865900	NC_029979.1	12009059	12010218	+	1160	protein_coding	probable calcium-binding protein CML30	-
107877645	5.69342	1.15599	3.30638	21.9818	22.4102	12.5504	3.38526	18.9808	-2.52701	0.0023181	0.0307511	LOC107877645	NC_029983.1	10493488	10501302	+	1004	protein_coding	uncharacterized LOC107877645%2C transcript variant X2	-
107870243	580.729	520.196	427.625	844.404	886.448	779.796	509.516	836.883	-0.716979	0.00232497	0.0308253	LOC107870243	NC_029981.1	8743803	8751169	+	1116	protein_coding	ubiquitin-conjugating enzyme E2 7	UQ_con
107865522	1619.78	1545.56	1310.43	940.669	989.369	717.881	1491.92	882.639	0.756989	0.00232936	0.0308666	LOC107865522	NC_029979.1	235924018	235929198	-	3005	protein_coding	probable linoleate 9S-lipoxygenase 5	Lipoxygenase
107842183	157.992	136.407	116.825	234.978	267.262	220.886	137.075	241.042	-0.817372	0.00233933	0.0309818	LOC107842183	NC_029985.1	20612810	20618449	+	3342	protein_coding	putative late blight resistance protein homolog R1B-16	NB-ARC
107867410	61.2043	31.2117	66.1275	8.33792	14.9401	24.264	52.8479	15.8474	1.74107	0.00234374	0.0310232	LOC107867410	NC_029977.1	9518499	9524549	+	929	protein_coding	adenine phosphoribosyltransferase 4	Pribosyltran
107867262	288.941	255.474	149.889	450.248	500.495	434.242	231.435	461.662	-0.998446	0.00234642	0.0310336	LOC107867262	NC_029980.1	12168797	12170757	+	1961	protein_coding	uncharacterized LOC107867262	-
novel.6177	86.8247	57.7995	102.498	34.8677	21.5802	41.8345	82.374	32.7608	1.32989	0.00234709	0.0310336	-	NC_029988.1	63619620	63630187	-	1636	-	-	-
107840848	17.0803	58.9555	44.085	12.8859	9.96009	10.877	40.0403	11.241	1.83876	0.00234935	0.0310466	LOC107840848	NC_029985.1	4862902	4867167	+	3498	protein_coding	TMV resistance protein N-like	TIR
107859394	684.634	508.636	309.697	253.928	233.232	218.376	500.989	235.179	1.08965	0.00235345	0.0310838	LOC107859394	NC_029978.1	136751463	136753941	+	1623	protein_coding	CBS domain-containing protein CBSX5-like	-
107862184	93.9415	99.4152	73.8424	41.6896	50.6305	30.9576	89.0663	41.0925	1.11431	0.00235549	0.0310938	LOC107862184	NC_029979.1	10416119	10419954	-	1791	protein_coding	cysteine-rich receptor-like protein kinase 6%2C transcript variant X1	Pkinase_Tyr
107840099	1094.56	1071.6	829.901	1622.1	1697.37	1521.1	998.688	1613.52	-0.692559	0.0023603	0.0311317	LOC107840099	NC_029984.1	141427950	141435723	-	918	protein_coding	magnesium-dependent phosphatase 1	-
107843959	4.27007	2.31198	4.4085	14.4019	20.7502	19.2439	3.66352	18.132	-2.31269	0.00236094	0.0311317	LOC107843959	NC_029986.1	203592202	203600004	-	4667	protein_coding	probable disease resistance protein At4g27220	NB-ARC
107848345	276.131	614.987	197.281	125.827	147.741	135.544	362.799	136.371	1.4121	0.0023695	0.0312277	LOC107848345	NC_029987.1	9131159	9132571	+	1413	protein_coding	F-box protein At2g27310-like	-
107852486	48.3941	39.3037	66.1275	21.2238	10.7901	22.5906	51.2751	18.2015	1.49446	0.00237187	0.0312419	LOC107852486	NC_029977.1	7598203	7599278	-	558	protein_coding	protein LITTLE ZIPPER 1-like	-
novel.6314	66.8977	101.727	51.7999	153.115	184.262	140.564	73.4749	159.313	-1.11602	0.00237705	0.0312931	-	NC_029988.1	214874943	214898278	-	989	-	-	-
107868483	112.445	89.0112	83.7616	181.16	148.571	238.457	95.0726	189.396	-0.997517	0.00238762	0.0314004	LOC107868483	NC_029980.1	215537099	215537884	+	786	protein_coding	ferredoxin-1	Fer2
107859537	15.6569	19.6518	24.2468	2.27398	7.47007	2.51007	19.8518	4.08471	2.29313	0.00238779	0.0314004	LOC107859537	NC_029978.1	140687913	140692025	+	2594	protein_coding	cysteine-rich receptor-like protein kinase 10%2C transcript variant X1	Pkinase_Tyr
107846833	91.0947	787.229	266.714	121.279	64.7406	82.8324	381.68	89.6173	2.0908	0.00239084	0.0314234	LOC107846833	NC_029987.1	177962758	177964158	-	1318	protein_coding	wall-associated receptor kinase-like 15	-
107858088	14.2336	8.09193	67.2297	3.78996	0.830008	5.85683	29.8517	3.49227	3.10034	0.0023988	0.031511	LOC107858088	NC_029978.1	130162447	130164556	+	1182	protein_coding	aquaporin NIP1-1-like	-
novel.4144	24.197	141.031	99.1913	25.7718	22.4102	22.5906	88.1397	23.5909	1.90504	0.00241309	0.0316814	-	NC_029984.1	129648378	129649781	+	1404	-	-	-
107870842	264.744	277.438	256.795	408.558	457.334	397.428	266.326	421.107	-0.660953	0.00241818	0.0317311	LOC107870842	NC_029981.1	130069137	130074152	+	1919	protein_coding	L10-interacting MYB domain-containing protein-like%2C transcript variant X3	-
107873795	105.328	131.783	59.5148	194.046	242.362	214.193	98.8753	216.867	-1.13477	0.00242304	0.0317777	LOC107873795	NC_029977.1	48646520	48650563	+	1524	protein_coding	uncharacterized LOC107873795	-
107872304	4.27007	27.7438	2.20425	0	0	0.836691	11.406	0.278897	5.30526	0.00242541	0.0317915	LOC107872304	NC_029981.1	8464073	8465602	+	703	protein_coding	major pollen allergen Ole e 10-like	-
107845369	199.27	171.087	138.868	334.275	307.933	265.231	169.741	302.479	-0.836532	0.0024333	0.0318777	LOC107845369	NC_029986.1	594405	602811	+	3593	protein_coding	FACT complex subunit SPT16-like%2C transcript variant X4	Peptidase_M24
107873183	22.7737	15.0279	23.1446	49.2695	56.4405	44.3446	20.3154	50.0182	-1.30338	0.0024379	0.0319037	LOC107873183	NC_029982.1	88065891	88070009	+	2893	lncRNA	uncharacterized LOC107873183	-
107856493	0	5.77995	13.2255	32.5937	29.0503	46.018	6.33515	35.8873	-2.46002	0.00243792	0.0319037	LOC107856493	NW_015961664.1	12931	19762	-	747	lncRNA	uncharacterized LOC107856493%2C transcript variant X2	-
107878807	4.27007	33.5237	31.9616	4.54796	2.49002	3.34676	23.2518	3.46158	2.75277	0.00244266	0.0319327	LOC107878807	NC_029977.1	142608003	142628007	-	1120	protein_coding	uncharacterized LOC107878807	-
107861249	7.11678	43.9276	25.3489	3.03197	6.64006	3.34676	25.4644	4.3396	2.56471	0.00244277	0.0319327	LOC107861249	NC_029978.1	140555757	140557376	+	889	protein_coding	uncharacterized LOC107861249	-
107840505	58.3576	25.4318	72.7403	22.7398	11.6201	10.0403	52.1766	14.8001	1.81257	0.00245107	0.0320238	LOC107840505	NC_029984.1	150300759	150301837	-	1079	protein_coding	auxin-responsive protein SAUR21-like	-
novel.1517	102.482	390.725	167.523	89.4431	60.5906	67.7719	220.243	72.6019	1.60188	0.00245304	0.0320323	-	NC_029979.1	219304151	219376454	+	2540	-	-	-
107875532	573.612	106.351	818.879	125.827	85.4908	169.012	499.614	126.776	1.97854	0.00245518	0.032043	LOC107875532	NC_029982.1	6039531	6042076	+	1184	protein_coding	expansin-A6-like	-
107872236	1360.73	2543.18	1628.94	854.258	1105.57	729.594	1844.28	896.474	1.04093	0.00245981	0.0320861	LOC107872236	NC_029977.1	42613892	42614875	-	984	protein_coding	tyramine N-feruloyltransferase 4/11-like	Acetyltransf_1
107848563	791.386	1366.38	592.944	410.074	451.524	403.285	916.903	421.628	1.12091	0.00246498	0.0321235	LOC107848563	NC_029987.1	95500171	95500870	+	617	protein_coding	uncharacterized LOC107848563%2C transcript variant X2	-
107862617	294.635	126.003	216.017	109.909	54.7805	85.3424	212.218	83.344	1.34583	0.00246533	0.0321235	LOC107862617	NC_029979.1	21922706	21925773	-	2112	protein_coding	cytochrome P450 71A22-like	p450
107860837	17.0803	91.3232	42.9829	12.1279	9.13008	15.0604	50.4621	12.1061	2.06468	0.00246719	0.0321306	LOC107860837	NC_029978.1	8641547	8646362	-	2294	protein_coding	NAC domain-containing protein 86-like	NAM
107876497	368.649	411.533	396.765	590.476	604.246	598.234	392.316	597.652	-0.606585	0.00247281	0.0321742	LOC107876497	NC_029983.1	70819956	70842467	-	3847	protein_coding	RRP12-like protein	-
107838791	61.2043	315.585	195.076	64.4294	43.1604	62.7518	190.622	56.7805	1.74887	0.0024732	0.0321742	LOC107838791	NC_029984.1	2143612	2150934	-	1878	protein_coding	glutamate decarboxylase 4-like	-
107872603	95.3648	364.137	120.132	57.6074	75.5307	33.4676	193.211	55.5353	1.79966	0.00247517	0.0321825	LOC107872603	NC_029981.1	187792823	187793937	-	1115	protein_coding	ethylene-responsive transcription factor 1-like	AP2
107873744	115.292	420.78	122.336	628.376	843.288	576.48	219.469	682.714	-1.63619	0.00247864	0.0322103	LOC107873744	NC_029977.1	48231396	48233637	-	2242	protein_coding	probable polyamine transporter At3g13620	-
107874221	287.518	277.438	349.374	181.918	195.882	161.481	304.776	179.76	0.762382	0.00248011	0.0322122	LOC107874221	NC_029977.1	52815549	52818907	-	2610	pseudogene	-	Pkinase
107862099	327.372	226.574	281.042	473.745	438.244	537.155	278.329	483.048	-0.796886	0.00248687	0.0322827	LOC107862099	NC_029979.1	8494815	8504404	+	2160	protein_coding	sucrose nonfermenting 4-like protein%2C transcript variant X2	CBS
107840033	8.54013	1027.68	95.8849	10.6119	14.9401	22.5906	377.367	16.0476	4.55619	0.00250073	0.0324452	LOC107840033	NC_029977.1	175041155	175045179	+	1579	protein_coding	putative auxin efflux carrier component 8	-
107845851	183.613	295.933	270.021	114.457	136.121	143.074	249.856	131.217	0.931773	0.00250336	0.0324598	LOC107845851	NC_029986.1	125939520	125947867	+	1479	protein_coding	KH domain-containing protein At3g08620-like	KH_1
107847449	1441.86	1433.43	1326.96	2039	2431.09	2004.71	1400.75	2158.27	-0.623769	0.00250454	0.0324598	LOC107847449	NC_029987.1	133240878	133249157	+	2912	protein_coding	copper methylamine oxidase-like	-
107864513	35.5839	261.254	58.4127	23.4978	34.0303	17.5705	118.417	25.0329	2.24376	0.00251089	0.0325248	LOC107864513	NC_029977.1	2527069	2529738	+	1839	protein_coding	1-aminocyclopropane-1-carboxylate synthase-like	Aminotran_1_2
107859904	152.299	2590.57	532.327	225.882	197.542	194.949	1091.73	206.124	2.40519	0.00252576	0.0326999	LOC107859904	NC_029978.1	148169839	148172254	+	1077	protein_coding	virulence protein STM3117-like	Glyoxalase
107844226	619.16	1260.03	775.897	396.43	425.794	474.404	885.028	432.209	1.03455	0.00252898	0.032724	LOC107844226	NC_029977.1	225341460	225346443	-	1113	protein_coding	UMP-CMP kinase 3%2C transcript variant X1	ADK
novel.482	7.11678	3.46797	15.4298	0	0	0.836691	8.6715	0.278897	4.91085	0.00253373	0.0327564	-	NC_029977.1	51280318	51281495	-	513	-	-	-
107871017	745.838	649.667	502.569	1060.43	1120.51	1023.27	632.691	1068.07	-0.756408	0.00253632	0.0327564	LOC107871017	NC_029981.1	175991352	176000735	-	2642	protein_coding	ATP-dependent zinc metalloprotease FTSH 4%2C mitochondrial-like	AAA
107874707	8.54013	109.819	16.5319	6.06394	4.98005	7.53022	44.9637	6.1914	2.86398	0.00253872	0.0327564	LOC107874707	NC_029982.1	14114129	14116078	+	1144	protein_coding	nuclear transcription factor Y subunit C-1-like%2C transcript variant X1	-
107865563	461.167	373.385	775.897	231.946	241.532	287.822	536.816	253.767	1.08167	0.00253884	0.0327564	LOC107865563	NC_029979.1	241445174	241449481	+	1301	protein_coding	probable fatty acid methyltransferase	-
107862603	1325.14	1066.98	1329.16	798.166	803.447	780.632	1240.43	794.082	0.6433	0.00253949	0.0327564	LOC107862603	NC_029979.1	21387648	21395141	-	3063	protein_coding	quinolinate synthase%2C chloroplastic	-
107866227	381.459	203.454	218.221	137.955	103.751	133.87	267.711	125.192	1.09389	0.00253959	0.0327564	LOC107866227	NC_029979.1	85203509	85204348	-	840	protein_coding	peroxisomal membrane protein 11-4	-
107873568	146.606	183.802	304.187	108.393	88.8108	93.7093	211.532	96.971	1.12723	0.00254298	0.0327707	LOC107873568	NC_029982.1	210897383	210899727	-	902	protein_coding	uncharacterized protein At5g48480	-
107858701	88.248	55.4875	106.906	43.9636	23.2402	30.9576	83.5473	32.7204	1.34994	0.00254341	0.0327707	LOC107858701	NC_029978.1	92078122	92081083	-	1514	protein_coding	probable galacturonosyltransferase-like 1	Glyco_transf_8
107866648	22.7737	115.599	33.0638	10.6119	4.98005	18.4072	57.1455	11.333	2.33773	0.00255254	0.0328709	LOC107866648	NC_029979.1	260703164	260706708	+	843	protein_coding	calmodulin-like protein 8	-
novel.4698	5.69342	5.77995	2.20425	19.7078	23.2402	17.5705	4.55921	20.1728	-2.16603	0.0025544	0.0328774	-	NC_029985.1	71447723	71450435	-	2597	-	-	-
107843748	2264.56	11183	3536.72	2081.45	1570.37	1504.37	5661.44	1718.73	1.71986	0.00255937	0.0329239	LOC107843748	NC_029986.1	199127383	199138339	+	2465	protein_coding	alpha-L-arabinofuranosidase 1	-
107875787	35.5839	58.9555	12.1234	115.973	130.311	93.7093	35.5543	113.331	-1.67461	0.0025624	0.0329453	LOC107875787	NC_029982.1	12195212	12196928	+	1717	protein_coding	UDP-glycosyltransferase 73C3-like	UDPGT
107862813	4197.47	3041.41	3676.69	6106.39	6979.53	5297.09	3638.53	6127.67	-0.752105	0.00257511	0.0330912	LOC107862813	NC_029979.1	28791304	28798662	+	3767	protein_coding	protein argonaute 1-like	Piwi
107865859	9.96349	48.5516	18.7361	6.82193	0.830008	3.34676	25.7504	3.66623	2.80577	0.00257908	0.0331247	LOC107865859	NC_029979.1	7441653	7442529	+	877	protein_coding	VQ motif-containing protein 11	-
107864350	1282.44	1544.4	1069.06	2299.75	4118.5	1974.59	1298.64	2797.61	-1.1072	0.00259646	0.0333302	LOC107864350	NC_029979.1	246112394	246114015	+	1622	protein_coding	crocetin glucosyltransferase%2C chloroplastic-like	UDPGT
novel.3266	29.8905	2092.34	246.876	53.0595	45.6504	35.9777	789.703	44.8959	4.13663	0.00260354	0.0334034	-	NC_029982.1	171267	172674	-	1408	-	PF00462:Glutaredoxin	-
107843906	46.9707	144.499	80.4552	29.5617	34.0303	33.4676	90.6416	32.3532	1.49055	0.00260684	0.0334279	LOC107843906	NC_029977.1	223189471	223190756	-	1286	protein_coding	ADP-ribosylation factor-like protein 2	Arf
107875177	166.533	4407.79	465.097	281.973	264.772	205.826	1679.81	250.857	2.74341	0.00261329	0.033493	LOC107875177	NC_029982.1	216775410	216776328	-	919	protein_coding	glutaredoxin-C13-like	-
107854566	76.8612	70.5154	103.6	135.681	175.962	175.705	83.6588	162.449	-0.954293	0.00261585	0.0335081	LOC107854566	NW_015961180.1	1472971	1476866	-	1717	protein_coding	F-box protein At5g06550	-
107866809	22.7737	159.527	100.293	21.9818	24.9002	3.34676	94.1979	16.7429	2.49277	0.00262008	0.0335445	LOC107866809	NC_029980.1	1109476	1112610	+	1919	protein_coding	lysine histidine transporter-like 8	Aa_trans
107875794	5.69342	198.83	58.4127	14.4019	9.96009	12.5504	87.6455	12.3041	2.83388	0.00263974	0.0337783	LOC107875794	NC_029982.1	12289440	12290747	+	700	protein_coding	uncharacterized LOC107875794	-
107877496	45.5474	11.5599	23.1446	85.6532	70.5506	81.159	26.7506	79.1209	-1.58077	0.00264175	0.0337862	LOC107877496	NC_029983.1	1688994	1697048	+	3644	protein_coding	serine/threonine-protein kinase At5g01020-like%2C transcript variant X4	Pkinase_Tyr
107850982	199.27	317.897	170.83	435.846	435.754	481.097	229.332	450.899	-0.974759	0.00264641	0.033828	LOC107850982	NC_029988.1	29855965	29857265	+	1301	protein_coding	AT-hook motif nuclear-localized protein 28-like	-
107840323	21.3503	21.9638	47.3914	8.33792	9.96009	7.53022	30.2352	8.60941	1.81974	0.00265123	0.0338716	LOC107840323	NC_029984.1	146902606	146904219	+	1614	pseudogene	-	-
107870158	310.291	201.142	96.9871	464.65	606.736	466.873	202.807	512.753	-1.34088	0.00265506	0.0338988	LOC107870158	NC_029981.1	4422966	4426959	+	3853	protein_coding	probable LRR receptor-like serine/threonine-protein kinase At3g47570	Pkinase
novel.340	24.197	11.5599	7.71488	60.6394	29.8803	57.7317	14.4906	49.4171	-1.79388	0.00265615	0.0338988	-	NC_029977.1	279043469	279044969	+	339	-	-	-
[truncated: 383 more rows]

## Sheet: cp6vscp0_DEGs
gene_id	cp_L6_1	cp_L6_2	cp_L6_3	cp_0h_1	cp_0h_2	cp_0h_3	cp_L6	cp_0	log2FoldChange	pvalue	padj	gene_name	gene_chr	gene_start	gene_end	gene_strand	gene_length	gene_biotype	gene_description	tf_family
[truncated: 6,232 more rows]

[truncated: 8 more sheets: cp12vscp0_DEGs, cc2vscc0_DEGs, cc6vscc0_DEGs, cc12vscc0_DEGs, cp0vscc0_DEGs, cp2vscc2_DEGs, cp16vscc6_DEGs, cp12vscc12_DEGs]
