# Supplementary material for: Integrated Transcriptomic and Metabolomic Analyses of Cold-Tolerant and Cold-Sensitive Pepper Species Reveal Key Genes and Essential Metabolic Pathways Involved in Response to Cold Stress
Source: Int J Mol Sci. 2022 Jun 15;23(12):6683. doi: 10.3390/ijms23126683 (PMC9224482; doi:10.3390/ijms23126683)
Supplement: Supplementary file 1 [file ijms-23-06683-s001.zip › S2_WGCNA.xlsx]

## Sheet: blue
Gene ID	cc_0_1	cc_0_2	cc_0_3	cp_0h_1	cp_0h_2	cp_0h_3	cc_L2_1	cc_L2_2	cc_L2_3	cp_L2_1	cp_L2_2	cp_L2_3	cc_L6_1	cc_L6_2	cc_L6_3	cp_L6_1	cp_L6_2	cp_L6_3	cc_L12_1	cc_L12_2	cc_L12_3	cp_L12_1	cp_L12_2	cp_L12_3
107862051	-0.718213	-1.0076	-0.872051	-0.405214	-0.399165	0.161779	-1.00544	-0.408392	-0.758413	0.20123	1.82371	0.457496	-0.901981	-0.814633	-0.763275	1.02908	2.74711	-0.221336	0.161305	-0.82776	-0.523824	1.17147	0.61953	1.25458
107853861	-0.489269	-0.471845	-0.497238	-0.3504	-0.24039	-0.465466	-0.515397	-0.463151	-0.39444	-0.391567	-0.314203	-0.427318	-0.506707	-0.504157	-0.359211	-0.024404	-0.358029	-0.0479772	-0.176664	-0.32321	-0.37018	2.55469	2.3937	2.74283
107868342	-0.911993	-0.855494	-0.90707	-0.322435	-0.20275	-0.592184	-0.825936	-0.767916	-0.83347	-0.353308	0.332273	-0.354071	-0.463966	-0.535855	-0.632547	0.207603	0.849212	1.42164	0.0872175	-0.0431044	-0.637643	1.72409	2.14645	2.47125
107875543	-0.850153	-0.884176	-0.816098	-0.283239	-0.204757	-0.292797	-0.736982	-0.71795	-0.595912	-0.291111	-0.0632351	-0.138231	-0.255851	-0.186632	-0.54962	0.0411419	0.535479	0.571325	-0.16712	-0.253837	-0.911013	1.75748	2.47013	2.82315
107878603	-0.951128	-0.945161	-0.949666	-0.152372	0.169016	-0.346436	-0.680495	-0.822755	-0.878041	-0.0407741	-0.0732795	1.13918	-0.573883	-0.580695	-0.72628	1.27199	0.728478	0.376863	-0.649683	-0.376083	-0.86366	1.46665	2.10746	2.35076
107863802	-0.565217	-0.625482	-1.27406	0.151409	1.35609	-1.02442	-0.503022	0.361581	0.294453	-1.41672	0.716142	-1.21565	-0.333218	-0.43864	0.721233	-1.01895	0.261016	2.18591	0.241478	-0.296097	-1.01734	0.212866	1.88383	1.34282
107875950	-1.42298	-0.91776	-1.13012	0.0485633	-0.00857698	0.247622	-1.91427	-0.525641	-1.02544	-0.208768	0.972884	-0.753094	-0.110938	0.0739615	-1.19165	0.782034	-0.207582	2.31777	0.567113	0.411861	1.16704	0.89191	1.32506	0.611016
107839615	-1.04535	-1.03786	-0.979718	-0.366568	-0.342675	-0.426991	-0.948596	-0.793675	-0.917191	-0.448663	2.59447	0.0554521	-0.412144	-0.43659	-0.779869	0.671926	1.30312	1.09107	0.110908	-0.228202	-0.644117	1.13391	1.39173	1.45563
107847440	-0.281051	0.0578658	-0.164637	0.23281	0.467962	0.188956	-1.17189	-0.146173	-0.657751	-0.0880306	-1.12435	-1.14987	-0.70909	-0.759219	-1.0187	0.326099	-0.472502	-0.169057	-0.626409	0.179456	0.495892	1.85494	2.79448	1.94027
107873401	0.223455	-0.322372	0.040959	0.654218	0.222946	0.670611	-1.24367	-1.08202	-0.978908	2.87989	-0.969826	-0.439431	0.0685753	-0.489691	-1.34187	-0.19193	-0.213853	-0.0772291	-0.677225	0.868802	-0.931676	0.799071	1.88073	0.650439
107859019	-0.689147	-0.614695	-0.576393	-0.130182	0.266874	-0.477922	-0.645161	-0.504236	-0.478138	-0.121429	0.0154551	-0.0604832	-0.717783	-0.679921	-0.467492	-0.22262	0.51425	0.152005	-0.482349	-0.401371	-0.692682	1.54903	2.08233	3.38207
107873526	-0.545525	0.306007	0.202857	-0.538061	-0.767207	-0.279143	-0.601795	-0.893032	-1.07651	-1.39818	0.580076	0.203292	-0.355997	-0.490424	0.576113	-1.02495	0.575216	1.52434	0.206694	-1.0273	-0.66576	1.48731	1.37056	2.63141
107843741	-1.18183	-0.923268	-1.22602	-0.537272	-0.32366	-0.791154	-1.13391	-0.739793	-0.758012	-1.07604	1.1811	-1.13904	0.0889221	0.481645	-0.502557	0.116234	0.565276	0.706299	1.69077	0.757573	0.194236	1.13617	1.87463	1.53969
107840396	-0.984026	-0.962864	-0.991957	-0.856042	-0.806844	-0.944582	-0.717759	-0.386411	-0.531393	-0.224501	-0.474686	-0.541319	-0.146325	-0.0860147	-0.317343	0.504533	0.923143	0.611831	-0.051719	0.113681	0.270167	2.0198	2.46217	2.11846
107853805	-0.756728	-0.748937	-0.718906	-0.858364	-0.822283	-0.879218	-0.379957	0.356017	0.108494	-0.823923	-0.687077	-0.463266	0.0710847	-0.0755894	0.487449	0.33937	-0.224621	0.0356698	-0.451846	-0.00842909	-0.494664	1.8613	2.51501	2.61941
107854537	-0.654159	-0.911954	-0.612012	-0.891425	-1.01686	-0.659068	-0.400296	-0.74629	-0.446625	0.396481	-0.714953	0.797559	-0.733609	-0.452642	-0.0205879	1.33491	0.160916	-0.67	-0.0465887	0.27465	-0.36919	1.95199	2.36645	2.0633
107852675	-0.0344574	0.0476839	0.396381	0.492689	0.31693	0.262776	-1.23093	-0.626969	-0.381263	-0.622023	1.01452	0.262533	-1.49925	-1.27616	0.642379	-0.879828	-0.711112	-2.15381	1.27421	0.223668	0.346836	0.503887	1.67462	1.95669
107850496	-0.381098	-0.491892	-0.409685	-0.398042	-0.282527	-0.496333	-0.188001	-0.495865	-0.435554	-0.391564	-0.368968	-0.424541	-0.394072	-0.453216	-0.359596	-0.118317	-0.27309	0.353809	-0.566499	-0.324525	-0.608157	1.8778	2.54508	3.08485
107843237	-0.972026	-0.336569	-0.126658	-0.1077	0.660455	0.734763	-0.420403	0.711141	0.505326	-0.671087	-0.406217	0.230861	1.72722	0.609213	-0.631835	0.894465	-0.453126	2.75534	0.12211	0.0153471	-1.03116	-0.430328	-1.75206	-1.62708
107867825	-1.15441	-0.834101	-1.00087	-0.161694	0.0979489	-0.407698	-0.849443	0.439205	-0.573173	-0.944649	0.447499	-1.00267	-0.432222	-0.31491	-0.833571	0.511328	1.16879	-0.229593	0.294256	-0.302477	0.0185343	1.50867	1.59344	2.96181
107850236	-0.339339	-0.147083	-0.560662	1.21782	1.47784	1.19337	-1.46281	-0.45069	-0.974745	-0.524524	-0.491042	-1.30783	-0.619022	-0.35173	-1.35652	0.175413	-0.759263	-0.103955	-0.126601	0.416135	0.0372385	1.44635	2.09592	1.51572
107843507	-0.746415	-0.725273	-0.769087	-0.319698	-0.236206	-0.415655	-0.717729	-0.452589	-0.549816	-0.369718	-0.508886	-0.152291	-0.528112	-0.5363	-0.572856	0.269093	0.855421	-0.116849	-0.211156	-0.193728	-0.259977	2.35791	2.19801	2.7019
107869979	-0.7349	-0.731916	-0.735787	-0.462414	-0.337732	-0.57774	-0.772534	-0.714344	-0.712329	-0.147034	0.919211	0.117235	-0.66589	-0.704608	-0.724349	0.784995	2.40091	1.68098	-0.662813	-0.688282	-0.763033	1.20088	1.4082	1.62329
107866863	-0.9482	-0.964156	-0.959661	-0.867207	-0.849097	-0.842026	-0.767751	-0.732129	-0.763128	-0.10561	-0.360386	0.0473367	-0.182627	-0.283396	-0.554561	1.93308	1.07248	0.244963	0.109067	0.390618	-0.258649	1.81547	1.86679	1.95879
107871269	-0.243451	0.72244	1.25538	-0.85651	-0.957485	-0.490218	-0.122693	0.519741	0.0166968	-0.564354	2.21583	0.270465	-0.328165	0.0587334	0.130101	-0.387049	-1.00453	-0.337031	0.561636	-0.618809	2.87729	-0.365376	-1.3842	-0.968452
107878129	-0.967009	-0.863171	-0.975774	-0.500758	-0.331714	-0.574701	-0.770674	-0.434316	-0.570854	-0.430412	-0.197632	-0.181098	-0.359916	-0.354656	-0.353885	0.0447675	0.547538	-0.336995	0.340306	0.267575	-0.176965	2.20797	2.31437	2.658
107870371	0.0495772	0.446696	0.637521	-0.942264	-0.839947	-1.19402	0.222731	0.659672	0.160141	-1.09842	1.54255	0.996327	0.740432	0.525423	-0.143816	1.05099	-1.55288	1.23298	1.25286	0.0151677	0.516578	-0.925321	-1.46673	-1.88625
107850965	0.10299	0.0562802	0.253972	-0.577896	-0.334464	-0.71476	0.719122	0.166938	-0.0677185	-0.700172	-1.17725	-0.797577	-0.309829	-0.443886	0.143792	-0.354395	-0.841505	-0.343701	-0.805362	-0.131967	-0.773649	1.82165	2.52572	2.58368
107855655	-1.0321	-0.248165	-0.972884	0.330111	1.04137	-0.0140652	-1.25711	-0.110958	-0.55536	-0.153837	0.908762	-0.409061	-1.26344	-0.951827	-0.637797	1.75525	-0.214815	-0.359769	-0.476922	-1.20384	0.936283	1.79554	1.34246	1.75218
107859655	-0.808683	-0.800659	-0.817141	-0.558834	-0.631379	-0.562466	-0.722497	-0.637407	-0.675828	0.226141	-0.635153	0.117268	-0.278274	-0.320404	-0.544644	0.270657	0.59933	0.0960202	-0.0724078	0.100362	-0.463733	2.18356	2.29924	2.63694
107875221	0.0749642	0.867365	0.305919	-1.15636	-0.470224	-1.38671	-0.0598006	0.791575	0.619664	-1.49417	-0.534466	-0.290387	0.0133146	-0.0551971	1.29883	0.587113	-1.48662	-0.0208195	-1.15802	-0.688741	0.162204	0.234705	1.05316	2.79271
107846940	0.114035	-0.0601297	-0.430152	-0.0498934	0.664332	-0.0735957	0.447524	-0.507372	-0.272191	-0.352579	-1.00859	0.637984	-1.04328	-1.05878	1.41583	1.92028	-1.07937	-0.542109	-1.08832	-0.95801	-1.25617	1.36706	1.2937	1.91979
107839143	-0.535569	-0.54355	-0.548614	-0.493907	-0.465864	-0.491976	-0.539461	-0.530428	-0.523391	-0.395447	-0.42241	-0.224828	-0.508598	-0.507816	-0.455162	0.236913	1.03654	-0.2651	-0.423473	-0.327417	-0.37532	2.27535	2.46565	2.56388
107862534	-0.0400877	0.229291	1.41699	0.274978	-0.00287418	0.722533	-0.115038	0.226616	-0.251856	-0.54938	0.406747	0.946754	1.18949	0.650448	-0.0686726	-0.355684	-2.20219	1.72004	0.64583	-0.0327939	0.0831768	-0.976062	-1.86656	-2.05169
107863039	0.456028	0.574905	0.93877	0.462926	0.798366	0.148892	0.0247585	-0.232854	-0.364936	-0.0876488	0.707729	-0.705817	1.76634	1.49281	-0.965491	0.00130597	-1.24309	0.390657	0.629372	0.828963	-0.0534848	-1.83528	-1.6318	-2.10141
107855731	-0.553501	1899-12-29 13:12:13	-0.354461	-0.22353	0.344812	-0.253772	-0.875428	-0.544928	-0.837935	-0.346919	0.832743	-0.42944	-0.972949	-0.980502	-1.09107	0.27043	0.814802	0.42013	-0.828446	0.15984	-0.593678	1.81421	2.5016	2.17784
107867678	-0.788821	1899-12-29 01:59:29	-0.944689	0.205358	0.607756	-0.0828854	-0.744938	-0.623647	-0.784604	-0.183086	0.459667	0.055518	-0.949118	-0.958053	-0.670472	1.71286	1.19543	0.563256	-0.530636	-0.877512	-0.989484	1.95457	1.32488	1.96566
107843732	-0.464401	-0.157588	-0.288477	0.140403	0.542148	0.133374	-0.700322	-0.432492	-0.515085	-0.368488	0.132677	-0.598129	-0.997295	-0.930124	-0.813588	0.271546	0.550763	0.133231	-1.12087	-1.0382	-0.185165	1.74886	2.11781	2.83942
107843087	-0.958859	-1.14849	-0.981721	-0.489863	-0.534546	-0.306211	-0.66018	-0.641681	-0.796527	0.0654844	0.627952	0.68084	-0.417582	-0.481499	-1.20471	1.19954	0.406886	-0.975482	0.228908	0.878873	-0.286884	2.30048	1.51024	1.98504
107842069	-0.90803	-0.886893	-0.922774	-0.907706	-0.892323	-0.883904	-0.547727	-0.472761	-0.583304	-0.0703744	-0.647796	-0.379899	-0.256802	-0.128552	-0.386731	1.15043	0.221006	0.569099	-0.290147	0.830577	-0.0802391	2.04712	2.18691	2.24081
107877759	-0.750839	-0.852403	-0.876797	-0.0329052	-0.255414	-0.0176263	-2.22963	-0.540381	-1.34168	-0.138293	1.08106	-0.0818033	-0.618512	-0.0428511	-0.531921	0.248908	-0.777442	1.71962	1.14027	-0.0339665	1.90329	1.0979	1.3726	0.558822
107869037	-1.43011	-1.2419	-1.22222	0.397113	0.770375	0.560387	-1.12336	-0.980805	-1.02227	0.151747	-0.0463568	0.144825	-0.0119109	0.14913	-0.449207	0.265018	-0.282985	1.01581	-0.191602	-0.28336	-0.932494	1.72086	2.09188	1.95144
107861646	0.0170228	-0.0944443	-0.523664	-0.279136	-0.456995	-0.273519	-1.02138	-0.413463	-0.754894	-0.476107	-0.671139	-0.0495354	-0.688801	-0.62026	-0.18269	0.423054	-0.363564	-0.802334	0.408463	-0.0622865	-0.382531	2.28833	2.27676	2.70312
107861650	-0.787811	-0.779358	-0.780575	-0.66068	-0.630908	-0.667054	-0.680896	-0.644934	-0.66338	-0.416806	-0.293989	-0.375638	-0.101296	0.0289806	-0.580282	0.215005	0.834728	1.23831	-0.224808	0.00728438	-0.582403	1.5953	2.89154	2.05968
107877653	0.570865	1.42513	1.55423	-0.223315	-0.0845428	0.429901	0.323149	0.210497	0.0659335	0.30586	0.242519	0.282116	0.451635	1.47914	-0.254427	-0.0746271	-1.10579	0.188169	0.513459	-0.729433	0.516714	-1.60062	-1.93422	-2.55234
107859669	-0.814096	-0.643337	-0.834538	-0.478124	-0.481471	-0.676273	-0.878736	-0.491854	-0.639239	0.0228396	-0.887423	-0.641901	0.124942	0.00638997	-0.831937	0.636105	0.349715	-0.378724	-0.154196	0.512497	0.299424	2.59856	2.05547	2.22591
107860183	-0.493292	06:23:18.675000	0.243398	-1.55442	-1.49627	-0.620291	-1.06237	-0.075099	-0.0684959	0.887631	-0.375323	1.31292	-0.680235	-0.722321	-1.00006	-0.242413	-0.821712	1.02552	-0.372542	-0.109264	1.13915	1.31058	2.34742	1.16131
107870355	-0.594189	1899-12-29 09:36:48	-0.593397	-0.598148	-0.586865	-0.601335	-0.582162	-0.539842	-0.53893	-0.566002	-0.441555	-0.529016	-0.367209	-0.34139	-0.206849	-0.263311	-0.0991507	-0.185169	0.408385	0.849013	-0.282512	2.15251	2.78665	2.3199
107859958	1.86433	1.64634	0.518413	-0.491106	-0.628625	-0.389767	-0.110835	-0.428293	0.276972	-0.664027	-0.772888	-0.508832	-0.825685	-0.854924	-0.123671	-0.550278	-0.500271	-0.744006	-0.662685	-0.87813	-0.592436	1.50895	1.66877	2.24269
107867185	-0.439355	-0.453095	-0.436781	-0.450055	-0.435456	-0.449304	-0.380879	-0.430319	-0.418739	-0.460726	-0.410639	-0.437831	-0.340512	-0.319975	-0.423752	-0.233157	-0.145592	-0.259713	-0.129274	-0.10755	-0.452293	2.22404	2.20184	3.18912
107860635	-0.247417	1.04681	-1.51624	-0.431829	0.407429	-0.701581	-1.66323	-0.229878	-0.67644	-0.401843	1.03006	0.302517	-0.129155	-0.236991	-0.981265	2.07655	-0.412987	-0.62142	-0.475052	-0.569378	-0.273534	1.20306	1.733	1.76881
107840374	0.110909	0.927083	1.04324	-0.246143	-0.469023	-0.874577	-0.458446	0.0710348	0.196459	0.534013	0.803071	-0.919019	0.729049	0.743082	-0.0915411	-0.634094	-0.140464	2.14963	-0.626067	0.357479	1.74781	-1.67134	-1.44499	-1.83716
107839824	1.94322	1.03885	0.712682	0.510028	0.498176	0.937964	0.777817	1.18137	0.891752	-0.434612	-1.38016	0.295329	0.344703	0.385638	0.192914	0.211535	-0.836682	-1.27992	-1.15482	-0.662966	0.302783	-1.54288	-1.32778	-1.60494
107876783	-0.186942	1.06143	-0.203055	-0.433931	-0.175579	-1.00652	-0.928414	0.500456	-0.628573	-1.33515	0.0510284	-1.1228	-0.842438	-0.628811	-0.760316	0.440289	-0.277154	0.84825	-0.416188	-0.583064	0.624078	1.5374	2.01022	2.4558
107850578	-0.991918	-0.957387	-0.985854	0.538064	0.891106	0.461238	-0.87155	-0.680426	-0.827915	-0.156074	-0.220845	-0.408894	-0.565375	-0.501904	-0.76716	0.554776	0.184745	0.177009	-0.373338	-0.437937	-0.628564	2.04485	2.18564	2.33771
107870826	-0.820151	-0.32196	-0.710076	-0.290891	0.0241095	-0.590415	-0.983406	-0.404857	-0.735759	-0.961125	0.314733	-0.853438	-0.603409	-0.594519	-0.230255	-0.49315	0.594312	0.858316	0.672447	0.0623322	-0.517997	1.70173	2.11438	2.76905
107861818	-0.914391	-0.939079	-0.767186	-0.234435	-0.0689516	-0.0307549	-0.581335	-1.15722	-0.884155	0.386153	1.70158	1.44518	-0.910256	-0.571168	0.0480506	0.190389	0.578525	-0.116861	-0.447949	-0.785718	-0.952344	1.4386	0.974154	2.59917
107875939	0.983196	1.18425	1.06748	0.694996	0.427471	0.600442	0.375648	1.03378	1.08954	1.3434	-1.75826	-0.239127	-0.185312	-0.284603	0.280546	-1.13431	-1.3366	-0.0607509	-1.3595	-0.366607	1.22915	-1.23627	-0.995094	-1.35347
107860298	-0.724405	-0.6772	-0.66533	-0.593296	-0.343327	-0.734034	-0.398792	-0.173972	-0.25238	-0.865744	-0.337268	-0.654082	-0.08907	-0.0432246	0.0682657	-0.24749	-0.273565	0.121209	0.173465	-0.101199	-0.545306	1.88948	2.6972	2.77006
107856823	-0.952725	-0.8137	-0.772906	0.0719339	0.452633	-0.0613202	-1.1316	-1.02253	-0.846018	-0.408715	0.620335	0.0711817	-0.358344	-0.179808	0.0425437	-0.837738	0.501664	0.135511	0.620735	-0.255951	-1.17306	1.36955	2.32429	2.60403
107875738	1.65075	1900-01-01 16:24:15	1900-01-01 05:45:42	0.0258562	0.186946	0.197935	0.116306	0.332088	0.500848	0.952969	-1.60873	-0.476298	0.658681	0.939588	0.160892	-0.927715	-1.46051	0.212567	-0.756682	0.21877	0.532077	-1.64392	-1.37753	-1.35847
107860321	-0.683781	1899-12-29 07:11:52	1899-12-29 06:57:08	-0.708119	-0.69804	-0.720532	-0.590198	-0.306992	-0.347058	-0.542317	-0.469995	-0.340596	-0.306769	-0.305646	0.24165	-0.20342	0.433491	-0.445371	0.349579	0.0537131	-0.291366	2.04915	2.55594	2.68709
107873437	-0.791295	-0.80339	-0.814286	-0.759465	-0.736461	-0.780208	-0.696283	-0.543476	-0.61648	-0.245751	-0.478606	-0.324377	-0.352461	-0.33543	-0.29959	0.249878	1.49281	0.201061	-0.144853	0.0357983	0.028378	2.02885	2.40535	2.28029
107858961	-1.16589	-0.973891	-1.22239	0.514505	0.905887	0.466105	-0.997321	-0.705864	-0.881864	-0.193334	0.333178	-0.447786	-0.646135	-0.481508	-0.932408	0.337184	0.795712	0.440559	-0.288524	-0.430292	-0.495935	1.92022	2.02864	2.12115
107870263	0.673247	0.739511	1.78775	-0.999565	-0.599528	-0.945078	0.911744	0.956016	0.660372	-0.977145	0.808381	0.662005	0.0329569	0.301427	0.314327	0.202603	-1.3962	2.08014	-0.527993	-0.652594	-0.177132	-1.00144	-1.37691	-1.4769
107868215	-0.88789	-0.800114	-0.810669	-0.54176	-0.39519	-0.613177	-0.786686	-0.357742	-0.613546	-0.412465	0.530689	-0.519916	-0.690975	-0.60861	-0.113573	0.424411	0.73522	0.250703	0.0661906	-0.347023	-0.484974	2.3118	2.25497	2.41032
107860642	0.461448	14:25:17.661000	0.639643	-0.348229	-0.405533	-0.794593	0.770037	0.559059	0.320097	-0.0542231	-0.0927286	-0.424879	2.27076	2.10315	-0.775019	-0.830638	-0.20975	0.336093	-1.32546	1.35396	-0.193388	-1.2221	-1.39732	-1.34129
107860661	-1.17887	-1.2159	-1.23014	-0.393603	-0.472197	-0.59175	-0.982865	-0.859903	-0.987291	-0.627555	1.81003	0.847541	-0.469644	-0.321929	-0.115882	1.87428	1.15678	1.55098	0.6353	0.0116939	-0.865372	0.919726	0.536034	0.970536
107843476	-0.844528	-0.725683	-0.821092	-0.694127	-0.588508	-0.78734	-0.853841	-0.50179	-0.598382	-0.475485	-0.528709	-0.267592	-0.298511	-0.231172	-0.523578	-0.076111	1.22925	-0.0151051	0.351223	0.380017	0.0825953	2.00905	2.22276	2.55665
107843197	-0.959911	1899-12-28 23:55:31	1899-12-29 05:27:03	-0.898984	-0.587811	-0.93159	-0.375866	-0.106776	-0.336288	-0.874527	0.133849	0.695563	-0.0766532	-0.205305	-0.242667	0.894615	-0.750037	0.578982	-0.00307983	-0.0532088	-0.420955	2.90294	1.0843	2.3094
107839335	1.21333	1.03205	1.50351	-0.737837	-0.543542	-0.7349	0.767602	0.598421	0.182666	-1.44537	3.0236	-0.64342	0.194423	-0.680654	-0.036686	-0.0574132	-0.33648	0.404035	-0.426675	-0.451463	0.169104	-0.93048	-1.07772	-0.986108
107866830	-0.714394	-0.712131	-0.697306	-0.689433	-0.448161	-0.697268	-0.435485	-0.469147	-0.355679	-0.739816	0.124701	-0.591343	-0.272295	-0.326648	0.0666718	0.219491	-0.204264	-0.370084	0.243686	0.110093	-0.405452	2.21374	2.38489	2.76563
107875009	-0.213709	-0.548955	-0.491647	-0.755749	-0.858942	-0.782723	-0.488545	-0.533088	-0.698065	1.13448	-0.514233	0.495091	-0.33652	-0.532369	-0.466679	0.0804946	0.518483	1.38639	-1.04937	-0.598892	-0.878084	1.93438	1.8921	2.30616
107875145	-0.628098	-0.664528	-0.63619	-0.660813	-0.550544	-0.683227	-0.59365	-0.497808	-0.547734	-0.192774	-0.277752	-0.235423	-0.51997	-0.52251	-0.48645	1.09816	0.401517	0.73091	-0.531286	-0.463139	-0.474899	2.23431	2.22282	2.47907
107856761	-0.798304	-0.770891	-0.729783	-0.265891	-0.0511429	-0.079809	-0.789515	-0.729716	-0.773814	-0.441044	2.52364	-0.540293	-0.388723	-0.450707	-0.84563	0.0460044	1.2601	0.066857	-0.68086	-0.0814138	-0.663662	1.81121	1.71491	1.65847
107850619	-0.725325	-0.749737	-0.738072	-0.477247	-0.519328	-0.575849	-0.64646	-0.250485	-0.455881	-0.557162	-0.424642	-0.494499	-0.381294	-0.357191	-0.255004	-0.186943	0.176965	-0.0164072	-0.0486963	0.177393	0.0547	2.15154	2.63076	2.66887
107864094	-0.0333965	07:36:53.541000	1.13208	0.930137	0.314005	0.427877	0.301344	-0.991208	-0.501713	0.0786497	1.89124	-0.0393861	0.724447	0.363237	-1.15067	-1.80084	0.819484	0.337882	1.1425	1.00753	-0.940257	-1.59928	-1.53787	-1.19308
107878523	0.363569	-0.147129	-0.104437	-1.44827	-1.9036	-1.15277	0.0358604	-0.846049	-0.479432	0.761579	0.0449411	0.225866	-0.131533	-0.457291	-0.807754	0.854467	2.85575	0.16996	-0.937172	0.797483	-0.507983	0.928327	0.935214	0.950402
107843129	-0.984173	-0.969176	-0.846653	0.505199	0.641192	0.712037	-0.750983	-0.989359	-0.75083	0.812151	-0.377136	0.153246	-0.669503	-0.700576	-0.547805	0.323407	-0.494688	0.532788	-0.889267	0.163993	-0.979378	1.76068	2.37503	1.9698
107875882	-0.819253	-0.820755	-0.818702	-0.365838	-0.205569	-0.436623	-0.803699	-0.77383	-0.781513	-0.703289	0.0350726	-0.646682	-0.14594	-0.231319	-0.710621	0.306156	0.14594	0.468922	0.426381	0.642766	-0.641096	1.97757	2.41376	2.48816
107861665	-0.695204	-0.71271	-0.718278	-0.63026	-0.620117	-0.620445	-0.607325	-0.510702	-0.551242	-0.479593	-0.332457	-0.310623	-0.337461	-0.228277	0.0537514	-0.0366661	0.361072	-0.1345	-0.0436391	-0.0355888	-0.165631	1.84344	2.67141	2.84105
107862086	-0.575313	-0.395894	-0.524519	0.0557419	0.375746	-0.219832	-0.740788	-0.291036	-0.492075	-0.601247	-0.512725	-0.761711	-0.393007	-0.360095	-0.648333	-0.157775	-0.0360028	0.11395	-0.445447	-0.286902	-0.451847	1.83744	2.46397	3.0477
107878289	-1.18371	-1.23433	-1.18267	-1.07269	-1.10009	-1.15657	-0.677622	-0.718004	-0.607285	-0.491159	0.976239	-0.315138	-0.100348	-0.0642973	1.048	0.461938	2.18507	0.517939	0.640502	0.302164	-0.203501	1.03369	1.60029	1.34159
107870989	-0.823349	-0.816658	-0.99258	0.981746	1.19776	0.717424	-1.1101	-0.292548	-0.644538	1.00497	-0.849391	-0.500149	-0.728871	-0.617427	-0.699663	0.220392	0.497724	-0.0959568	-0.832067	-0.95824	-0.199943	1.32654	2.25117	1.96376
107845405	0.534796	17:31:27.146000	1900-01-01 05:00:53	-0.617417	-0.746733	-0.548859	1.94186	0.0359172	0.241192	-1.11835	0.873944	0.172889	1.21178	1.13819	-0.43452	-0.577932	-1.14146	1.75092	0.0872048	-0.139543	-0.836824	-1.49003	-1.59151	-0.684632
107860000	-0.528799	-0.526602	-0.544675	-0.480617	-0.438975	-0.537516	-0.556728	-0.544741	-0.526108	-0.496631	-0.468256	-0.477684	-0.452018	-0.452587	-0.32144	-0.457378	-0.264972	-0.349887	0.679389	0.739422	-0.289401	2.23489	2.68338	2.37794
107878453	-0.526893	0.97383	-0.320617	0.177572	1.78042	-0.148706	-0.995284	1.33102	-0.488339	1.03948	-0.836131	-1.20705	0.517026	0.558773	-1.16114	0.0696194	-0.379003	-0.927309	-0.993716	0.385636	2.6005	0.175651	-0.703643	-0.921679
107848151	-0.577636	0.186891	0.193292	-0.286072	-0.201975	-0.246961	-0.623414	0.316789	0.0307821	-0.833315	2.16864	0.763626	0.0658274	0.145351	-0.48946	0.979683	-1.50786	1.68864	0.791369	-0.355194	1.77655	-0.822749	-1.54397	-1.61885
107878731	-1.01374	-0.995166	-1.05603	-0.190483	0.0412611	-0.326103	-0.808894	-0.891597	-0.918284	-0.0936864	0.483711	-0.868688	-0.091483	-0.0348997	-0.828161	-0.443225	1.13995	0.300293	0.377906	0.689962	-0.54271	1.26342	2.19185	2.6148
novel.4387	-0.192494	1899-12-29 07:23:47	-0.0600896	-0.123583	-0.58546	-0.0536901	-0.432985	-0.889981	-0.319109	1.22918	-0.844072	0.354784	-0.628516	-0.632076	-0.250669	-0.375744	-0.00223919	-0.100907	-0.961466	-0.241848	-1.00091	1.84703	2.47901	2.47764
107840868	-0.936777	-0.656132	-1.01391	0.790388	0.773906	0.343332	-1.0979	-0.316252	-0.763944	-0.185995	-0.755216	-1.38142	-0.0621836	-0.399497	-0.901776	0.169663	-0.446889	0.689406	-0.161356	0.12992	-0.0428068	1.64732	2.31866	2.25944
107850513	0.617683	1.15457	1.44044	0.252416	0.470382	0.606254	0.600286	1.55406	1.20322	0.0782541	-1.67166	-0.98365	0.938586	0.418316	-0.159052	-0.868036	-2.21627	0.103803	-0.408921	0.153086	-0.018265	-0.985597	-0.984945	-1.29496
107863810	-0.530981	-0.522882	-0.517804	-0.490092	-0.473679	-0.504588	-0.503937	-0.463878	-0.448638	-0.425938	-0.467051	-0.306007	-0.0889328	-0.224712	0.067524	-0.387005	-0.378873	0.241612	-0.114432	-0.225572	-0.392249	1.99939	1.49367	3.66506
107860330	-0.554723	1899-12-29 07:45:58	-0.607355	0.727085	0.932068	0.946487	-0.675446	-0.827926	-0.794256	0.0919622	-0.218166	0.274537	-1.13318	-1.0542	-0.7373	1.14128	0.342859	-0.873009	-0.735811	-0.811365	-0.514105	2.02413	1.96448	1.76836
107848099	0.18489	15:51:56.840000	1.77534	-0.173141	-0.0711233	-0.0681056	1.3054	1.1951	1.01754	-0.156228	-0.471134	0.683412	0.621584	0.120509	0.278869	-0.0116165	-2.22562	0.642044	-0.41842	0.0741852	-0.00367352	-1.29015	-1.71375	-1.95697
107860239	-1.12101	-1.07566	-1.10547	-0.697091	-0.644552	-0.798899	-1.04203	-0.476245	-0.633215	-0.227013	0.4462	-0.224473	0.20354	0.219734	0.397434	-0.522679	1.92676	0.591305	-0.160927	-0.22696	-0.386618	1.17158	2.25596	2.13032
107843919	-0.798953	1899-12-29 04:41:19	-0.810228	-0.693893	-0.661443	-0.700395	-0.65865	-0.529245	-0.555053	-0.44848	-0.420746	-0.514913	-0.40148	-0.3449	0.0157772	-0.0552414	0.67666	-0.263772	0.321115	0.414112	0.13559	2.15908	2.56244	2.37725
107847595	-1.23272	1899-12-29 05:42:06	1899-12-29 00:07:17	1.05756	1.28279	1.17006	-1.11206	-0.32897	-0.923325	0.471967	-0.658103	-0.646155	-0.15926	-0.5152	-1.35895	0.711895	-0.0617009	-0.466231	-0.879161	-0.227941	0.639128	1.62496	1.89849	1.47029
107839261	-1.14956	1899-12-28 19:55:31	1899-12-28 20:04:16	-0.963194	-0.874434	-0.946688	-0.913568	-0.74002	-0.829276	-0.571962	1.80867	0.0960092	0.415964	0.293128	-0.358859	-0.303101	1.48223	0.550549	1.77888	0.959835	-0.323839	0.469799	1.6075	0.845402
107853475	0.327057	0.421197	0.748833	-0.0149742	-0.582848	0.423085	-0.800659	-0.0677054	-0.438372	1.38744	0.326263	1.87828	0.517664	0.406098	-1.0148	-0.173135	-1.40767	-1.2703	-0.0966822	0.149271	2.41518	-0.33544	-1.03847	-1.75932
107851279	-0.811695	1899-12-29 04:16:22	-0.819129	-0.794922	-0.792494	-0.807828	-0.683758	-0.593374	-0.609937	-0.451511	-0.312903	-0.372465	-0.264043	-0.33656	-0.217926	0.302187	1.24228	0.510236	0.0318499	0.115806	-0.228407	2.0135	2.62017	2.08288
107840135	-1.43015	1899-12-29 11:07:18	-1.57261	-0.332188	-0.228841	-0.954605	-1.11534	0.0851315	-0.346199	-0.745914	2.34769	-0.824552	-0.214839	0.226981	-0.346501	-0.0800072	1.35298	1.72038	-0.0957744	-0.16453	0.368921	0.278503	1.7135	0.894549
107875683	-1.15462	-1.18104	-1.11374	-1.1508	-1.16783	-1.16514	-0.533746	-0.299942	-0.282721	-0.27667	1.97552	-0.120927	0.212019	0.150955	0.937902	0.827715	2.48665	0.88862	-0.235	-0.431069	-0.350708	0.253143	0.913834	0.81759
107840533	-0.472576	-0.557358	-0.0101498	-0.397853	-0.578784	-0.640121	-0.833923	-0.85023	-0.310695	0.686705	-0.696806	-0.309967	-1.08571	-0.941486	-0.761944	0.639837	0.995893	0.449856	-0.467849	0.367732	-0.667321	1.8818	2.23661	2.32434
107863184	-0.73359	-0.775307	-0.742846	-0.484221	-0.479109	-0.475788	-0.712165	-0.679605	-0.676216	-0.452817	-0.358849	-0.108077	-0.14512	-0.131489	-0.67697	0.328611	0.633977	-0.00219898	-0.157319	0.110113	-0.502902	2.1659	2.33083	2.72516
107877628	-0.81606	-0.717714	-0.683403	-0.206785	-0.0986327	-0.114276	-0.729898	-0.77271	-0.80941	-0.443676	-0.16403	-0.546011	0.06782	0.0452347	-0.884626	-0.0281493	-0.198414	0.485314	0.111155	0.0940012	-0.741631	2.22551	2.10555	2.82084
107860510	-0.656936	-0.652607	-0.675537	-0.629276	-0.626647	-0.638899	-0.629028	-0.549353	-0.5588	-0.300887	-0.600991	-0.250061	-0.487277	-0.493025	-0.282619	0.190685	1.34971	0.0511822	-0.232706	-0.151094	-0.187629	2.17229	2.45732	2.38218
107862499	-1.18883	-0.474867	-1.37233	-1.08713	-0.654017	-1.1626	-1.12006	-0.552306	-0.923578	-0.327596	1.05372	-0.391782	-0.438186	-0.197476	-0.365768	1.59329	1.16947	0.576435	0.964529	0.0628896	0.233232	1.7615	1.39649	1.44497
107839785	-0.532695	-0.287021	-0.807722	-0.686076	0.194468	-0.997904	-0.767545	0.795736	-0.625948	-1.39269	-0.181251	-1.36111	0.38383	0.112249	-0.513417	1.46407	-1.03291	1.75408	0.0206113	-0.36696	-0.120893	1.59099	1.61658	1.74152
107842449	-0.517855	1899-12-29 18:10:08	-0.464743	-0.385691	-0.326166	-0.503682	-0.742107	-0.687459	-0.742165	-0.73954	0.600099	-0.584809	-0.73329	-0.710135	1.43993	-0.517829	0.762728	0.11378	-0.282355	-0.463992	-0.708267	1.54669	2.40931	2.4805
107875928	0.625786	0.608863	1.11953	0.883921	0.304065	0.286103	0.143712	0.331672	0.0808046	-0.516572	1.70615	-0.612832	1.26438	1.58371	-0.521259	-1.0259	-0.9605	0.000563827	0.0543475	-0.140265	0.223859	-1.93124	-1.86838	-1.64053
107839843	1.30965	1900-01-01 01:47:09	1.43613	0.885269	0.174205	0.331199	0.141897	0.212463	0.544311	1.80662	-0.803131	0.482951	-0.162685	0.292155	0.369353	-1.04024	-1.27208	-0.994318	-0.690775	-0.56476	0.922631	-1.38204	-1.0764	-1.99683
107839919	0.447247	18:33:22.898000	-0.0246296	-1.03811	-0.687014	-1.22157	-0.120553	0.144517	-0.0195328	-1.22582	-0.676329	-1.1269	-0.762191	-0.46843	0.920255	-0.354365	-0.171974	0.0884827	0.000532393	-0.813303	0.529264	0.883299	2.11605	2.80788
107842883	-0.879292	-0.746248	-0.793376	-0.564111	-0.269775	-0.902828	-0.959848	-0.937459	-0.774498	-0.188664	1.36266	-0.415509	-0.0518347	0.151539	-0.698409	-0.00646762	0.814356	2.75794	-0.229086	0.184087	-0.753301	0.579873	1.86551	1.45475
107871198	-1.24184	1899-12-29 00:08:32	-1.09627	0.0205589	0.068852	-0.36453	-1.34015	-0.94412	-1.16698	-0.659197	1.17092	0.556193	0.0103461	-0.103666	0.946276	-0.250859	0.754854	0.365365	-0.305152	0.0460917	-0.764301	0.967523	1.7568	2.56735
107843854	0.251314	1.48618	1.60219	0.811255	1.22433	0.908676	-0.0514768	0.777374	0.453125	0.709039	-0.641607	-0.0160519	0.341908	-0.196547	-1.19669	-0.572398	-2.59682	-0.219564	-0.389169	-0.0995337	0.688921	-0.562091	-1.1174	-1.59496
107843636	-0.634407	-0.60423	-0.614772	-0.474702	-0.0373817	-0.656202	-0.473803	-0.204373	-0.318429	-0.574637	-0.668519	-0.656764	-0.541883	-0.535283	0.152223	1.48519	-0.375261	0.921789	-0.592968	-0.378059	-0.620533	2.14194	2.92914	1.33192
107867105	-0.709555	-0.771801	-0.683556	0.819655	1.65996	0.470239	-1.02182	-0.519257	-0.812605	0.798309	-1.23176	-0.62347	-0.599966	-0.829087	-0.670821	-0.419604	0.404927	1.2551	-0.950807	-0.0419722	-0.465815	1.02312	1.95244	1.96815
107871202	-0.453656	0.409669	-0.0283286	0.314329	0.632187	0.559299	-0.00176369	0.669656	0.576954	1.65808	0.489985	0.582394	0.896949	0.673052	-0.242952	-0.618052	-0.814444	-1.35233	1.89579	-0.069869	-0.396604	-1.61688	-1.70633	-2.05712
107861941	-0.796967	-0.727117	-0.76406	-0.483508	-0.498553	-0.474477	-0.819	-0.745797	-0.723976	-0.0230541	0.110286	-0.225257	-0.520282	-0.520117	-0.293826	-0.351854	1.5694	0.314704	-0.0512279	-0.128106	-0.536021	1.98549	2.58381	2.11952
107856558	-0.872886	-0.872286	-0.921699	-0.733531	-0.487419	-0.831864	-0.688806	-0.645526	-0.726631	-0.819778	0.984984	-0.449429	-0.489837	-0.551101	-0.342713	0.737007	1.01363	1.01479	0.339603	0.189541	-0.718694	1.84342	1.53931	2.48992
107843415	-1.2437	-0.974896	-1.15959	-0.680534	-0.802583	-0.922185	-1.06668	-0.299308	-0.742646	-0.540822	0.391549	-0.568682	0.590244	0.352596	-0.61085	-0.215663	1.34784	2.02904	-0.0534646	0.742678	-0.0891761	0.951044	1.81453	1.75126
107873625	-0.0787991	-0.513972	-0.795622	0.841609	0.877226	0.630722	-0.656098	-0.698502	-0.109802	0.977062	-1.14286	0.0717368	-0.71691	-0.890466	-0.840837	0.84351	-0.623235	-0.350268	-1.74364	-0.526531	-0.151466	1.86331	1.81716	1.91668
107850744	-0.600557	-0.448331	-0.82568	-0.163358	0.481794	-0.272733	-0.518113	-0.212536	-0.400226	-0.878011	0.547101	-0.245111	-0.86065	-0.856662	0.150339	0.611213	-0.370956	-0.392359	-0.535295	-0.828762	-0.348243	2.14342	2.00325	2.82047
107860702	-0.608016	-0.551812	-0.52275	-0.564778	-0.571022	-0.711822	-0.595097	-0.186552	-0.307577	-0.643411	-0.0714252	-0.694298	-0.599051	-0.55563	0.112652	-0.321145	0.980989	-0.260012	-0.102805	-0.270526	-0.125686	2.12722	2.09437	2.94818
107863562	-0.682117	-0.685377	-0.684996	-0.534932	-0.563322	-0.497117	-0.668322	-0.669703	-0.669575	-0.508273	-0.18789	-0.29123	-0.474337	-0.322438	-0.448289	0.0432411	0.887905	-0.185474	0.544961	-0.150859	-0.420289	2.22617	2.42976	2.51251
107875266	0.603154	0.635836	0.815584	-0.89363	-0.930093	-0.959571	0.857947	0.775154	0.701266	-1.08665	0.193931	0.581748	0.984588	0.603387	0.524574	-0.123226	-1.44007	0.404829	1.59296	0.391048	0.776125	-1.45201	-1.7137	-1.84318
107872420	-0.652538	-0.597303	-0.644293	-0.488333	-0.431122	-0.545667	-0.631021	-0.645486	-0.62992	-0.592824	0.000939983	-0.399218	-0.55526	-0.557093	-0.0572589	-0.119169	0.109443	0.0751647	0.231483	0.111343	-0.405038	2.7103	2.46285	2.25003
107871184	-0.617265	0.00734872	-0.887039	-0.241856	-0.379826	-1.57534	-0.463467	1.47654	0.297281	0.58321	-0.060974	0.827302	1.46796	0.842998	-0.118535	2.42023	-0.634416	0.772666	-0.503487	-0.212259	0.807287	-1.08609	-1.54024	-1.18202
107867998	0.114307	0.355593	-0.479735	-0.0641152	0.564275	-0.587358	-0.634364	0.63957	-0.419086	0.121219	1.07411	-1.51108	-1.38308	-0.748454	-0.673366	-0.382685	0.477366	1.30788	-1.32981	-1.44894	-0.0175912	1.50342	1.45918	2.06275
107873578	-0.416571	0.780702	-0.102053	-0.818552	-0.35201	-1.07402	-1.13523	0.625372	0.378416	-0.792301	-0.403013	-1.61813	-0.211982	-0.296669	-0.722225	-0.328153	0.401798	-0.137848	-0.287421	-0.125421	0.276015	1.79805	2.65137	1.90987
107868548	-0.866215	-1.03828	-0.950593	-1.09915	-1.10961	-1.11919	-0.700908	-0.812576	-0.881579	-0.350261	0.200166	0.508751	0.00096683	-0.0346383	-0.557061	1.70671	1.75032	0.17759	0.300206	0.647609	-0.393592	1.64973	1.7149	1.25672
107865997	-0.103675	-0.302548	-0.240213	-0.0309983	-0.0629284	-0.173693	-0.178159	-0.655434	-0.35917	-0.290628	-0.391977	0.0312945	-0.719039	-0.722229	0.0906272	-0.039737	-0.576623	-0.632205	-0.728795	-0.717371	-0.662048	2.46045	2.75897	2.24614
107867498	-0.507278	-0.375977	-1.10771	1.11521	1.27296	1.02371	-1.30319	-0.240047	-0.205089	0.278433	-0.614283	-0.383525	-1.14148	-0.956554	0.353448	0.697167	-1.57748	-1.37482	0.551601	-0.722384	1.51189	1.43041	1.37088	0.904116
107864586	-0.640111	-0.486291	-0.63118	-0.611063	-0.351759	-0.741147	-0.510167	-0.139166	-0.378149	-0.430206	-0.632706	-0.727789	-0.351341	-0.321776	-0.126083	0.138235	0.202249	0.306139	-0.273693	-0.35061	-0.32168	2.08763	2.24561	3.04505
107878080	-1.03374	-0.917482	-1.00943	-1.00802	-0.822763	-0.973423	-0.544074	-0.2582	-0.528247	-0.253683	-0.254586	0.192761	0.203061	0.199905	-0.707514	2.12003	0.161608	2.37765	-0.186779	0.147632	-0.736415	0.879721	1.73708	1.21491
107865075	-0.0721857	0.0679872	-0.464865	0.490758	0.811736	0.318795	-0.720628	-0.437201	-0.545894	-0.14619	-0.696547	-0.47273	-0.838841	-0.8948	-0.481344	0.686093	-0.752301	-0.710857	-0.82102	-0.775688	-0.319611	2.46151	2.07116	2.24267
107852749	-0.598126	-0.29432	-0.51099	-0.499839	-0.188383	-0.639455	-0.425746	-0.326649	-0.246554	-0.745841	-0.262922	-0.580978	-0.662113	-0.727536	0.0508716	0.249706	0.202988	0.2006	-0.434138	-0.528228	-0.443357	2.12616	2.53046	2.75438
107843616	-0.965496	-0.928543	-0.983757	-0.368734	-0.0154052	-0.699916	-1.06962	-0.255793	-0.529244	-0.73764	2.55009	-0.536535	-0.104179	-0.457502	-0.595651	0.389236	0.20329	1.4577	0.1675	-0.3073	-0.809146	1.45093	1.3935	1.75222
107878174	0.197785	0.705292	0.510977	0.525795	1.17042	-0.180962	-0.415328	0.280467	-0.227413	-0.653712	1.70663	-1.24451	0.266103	0.329868	-0.243984	-0.770708	-0.334893	0.804931	2.03951	0.628901	0.0907999	-1.7886	-1.37861	-2.01877
107842371	0.131166	-0.0620858	0.191733	0.424074	-0.0449953	0.987153	1.45683	-0.439628	0.316172	2.21251	-0.630938	0.766131	0.781383	0.534885	0.421533	-0.928976	-1.17888	-1.52717	1.30097	-0.00296686	-0.530083	-1.53566	-1.37498	-1.26819
107862612	0.578961	0.883623	0.339284	-0.448987	-0.405094	-0.805769	0.909774	1.00496	0.641179	-1.20232	2.17061	-1.23394	0.883449	1.0935	0.267643	-0.839853	-0.340943	-0.584682	0.622088	0.106219	0.800092	-1.42127	-1.51266	-1.50586
107845735	-0.280309	-0.211663	0.744016	-0.870516	-0.580462	-0.519728	0.866995	0.829897	0.402496	-1.02396	0.401736	1.56717	1.52335	0.952559	-0.166238	0.317901	-1.81723	1.04856	1.16	0.076324	-0.417874	-0.656859	-1.23983	-2.10635
107860206	-0.899306	-0.768113	-0.748033	0.0394028	0.4976	-0.30187	-0.662947	0.0563887	-0.391501	-0.485036	-0.623771	-0.383317	-0.158623	-0.362895	-0.693571	1.3863	-0.599241	0.668155	-0.706603	-0.541156	-0.817446	1.96323	1.82845	2.70389
107869990	-1.02064	-0.869437	-0.915348	0.298735	0.383482	0.354281	-0.987788	-0.197564	-0.607124	0.676254	-0.845099	-0.175674	-0.897369	-0.722109	-0.382478	0.37422	-0.165332	-0.166456	-0.600296	-0.689479	0.535516	2.19582	2.31032	2.11356
107864281	-0.464529	-0.438286	-0.52566	-0.385121	-0.261586	-0.405808	-0.556351	-0.292048	-0.408846	-0.451979	-0.538431	-0.489978	-0.461258	-0.473554	-0.441418	-0.00774906	0.0334788	0.150099	-0.492057	-0.4138	-0.313758	2.50465	2.6633	2.4707
107843579	-0.709928	-0.738947	-0.704156	-0.714591	-0.716987	-0.706689	-0.281591	-0.513715	-0.347184	-0.318685	-0.559882	-0.279678	-0.296299	-0.23401	-0.107517	0.670411	0.269158	-0.200837	-0.422164	0.000702484	-0.407908	2.41578	2.6072	2.29752
107839221	-0.997099	-0.449198	-0.664002	-1.10051	-0.705012	-1.44402	-0.788614	-0.160349	0.311075	0.713112	0.89278	-0.407256	0.0831074	0.15112	0.198205	-0.200964	2.8468	0.785567	-1.26957	-0.435185	-0.686218	0.498487	1.4612	1.36654
107867776	-0.654814	-0.696725	-0.629223	-0.615174	-0.40917	-0.672343	-0.693006	-0.637125	-0.429769	-0.262577	0.0758142	0.41157	-0.516772	-0.554245	1.98058	-0.56157	0.675618	0.0920568	-0.530147	-0.505365	-0.797704	1.21126	1.95559	2.76324
107843860	-1.02491	-0.235782	-0.812315	-0.139427	0.604507	-0.479564	-1.35653	0.0217087	-0.745714	-1.21005	1.49394	-1.20669	-0.46868	-0.313194	-0.815948	1.61185	0.123257	2.55529	0.0565526	-0.372851	-0.14507	1.12773	0.934233	0.797647
107848867	1.39373	1.45498	1.32023	0.356313	-0.160385	0.630481	0.797801	0.76969	0.73357	0.958782	-1.47337	-0.336194	0.592775	-0.229175	-0.017476	-0.795615	-0.940627	0.348934	-0.81381	0.133062	0.403731	-1.63306	-1.84292	-1.65144
107858631	0.0488879	0.289853	-0.272669	-0.316518	-0.417529	-0.0302223	-0.254671	-0.255987	-0.384505	0.378475	-0.93439	-1.2308	-1.09906	-1.11471	0.0888998	0.0202471	-0.271468	-0.754614	-0.651032	-0.550948	1.0462	2.13351	2.3132	2.21985
107842963	-0.309062	-0.107682	-0.00885137	-0.143591	-0.0861609	-0.851551	0.358064	0.431787	-0.469444	-0.813889	1.01405	1.44183	1.5993	1.45869	-0.626749	-0.177973	-0.687603	1.19575	1.15092	0.663991	0.165756	-1.6616	-1.85999	-1.67599
107843169	-0.716538	-0.726568	-0.727602	-0.668227	-0.710548	-0.706956	-0.689203	-0.597432	-0.598728	-0.584913	0.00305126	-0.489242	-0.410018	-0.370571	0.260946	-0.122664	0.488588	0.30851	0.0973325	-0.0867836	-0.083756	1.9037	2.90674	2.32088
107847796	-0.416408	-0.397007	-0.541604	-0.0509212	-0.0733256	-0.181709	-0.974734	-0.577684	-0.566913	-0.599094	-0.679273	-0.666627	-0.491554	-0.388281	-0.295742	-0.253004	-0.125471	-0.725352	0.321022	0.499885	-0.157987	2.32962	2.42522	2.58694
107871794	-1.05245	-0.844567	-1.12669	0.31503	0.655738	0.209964	-1.05888	-0.65136	-0.892059	-0.484936	-0.571452	-0.828541	-0.354072	-0.456672	-0.703937	0.383632	0.0674854	1.20358	0.0176925	-0.00394181	-0.0985838	1.74699	2.30564	2.22239
107877640	-0.886375	-0.97964	-0.797179	-0.654246	-0.70291	-0.714993	-0.629107	-0.941718	-0.784156	-0.15945	0.844235	0.387806	-0.204856	-0.38747	-0.416523	-0.260171	1.68618	0.696276	-0.218428	0.128575	-0.828357	1.34836	2.06245	2.4117
107859840	0.0164791	0.492444	0.278639	0.410187	0.0183295	0.279152	-0.598889	-0.983883	-0.93828	-0.73637	0.81655	-0.618847	-0.372183	-0.551504	-0.190964	-1.09578	0.0195886	-0.561767	0.0710346	-0.84633	-1.11445	1.55978	1.47373	3.17334
107867619	-0.765505	-0.76746	-0.785338	-0.465943	-0.265701	-0.517009	-0.677403	-0.707323	-0.673121	-0.380653	0.12226	0.0775079	-0.577938	-0.54201	-0.301194	0.29288	0.834965	0.25704	-0.240229	-0.234344	-0.519333	1.53912	2.04475	3.25198
107878229	-1.25717	-0.923446	-1.27678	1.30342	1.58076	1.17512	-0.892571	0.474392	-0.407673	-0.0385548	-0.609648	-0.038331	-0.807816	-0.806441	-0.445173	1.81526	-0.908868	-0.872613	-0.21008	-0.494338	-0.251201	1.38395	1.24282	1.265
107843785	-0.710444	-0.0192275	-0.562694	0.368087	1.09046	0.0891802	-0.972315	0.00138825	-0.195762	1.47818	-0.661635	-2.3691	-0.676164	-1.01275	-0.857154	-0.371482	0.561628	1.30001	-1.09812	-0.0126165	0.789633	0.728504	1.732	1.38039
107840522	1.45685	1.21949	1.65436	-0.888092	-1.08573	-0.789393	0.724709	-0.125001	-0.0932869	-0.882678	2.0073	-0.510421	0.762455	0.728296	-0.291304	-0.626911	-0.372005	0.740412	0.746508	0.176952	-0.622268	-1.43928	-1.34147	-1.1495
107877900	-0.627196	-0.684873	-0.703366	-0.578011	-0.484445	-0.583219	-0.536652	-0.500413	-0.462429	-0.503265	-0.0458144	0.307537	-0.363249	-0.3782	0.585311	-0.205278	0.0349302	-0.0138906	-0.40234	-0.445728	-0.588725	1.57954	2.58805	3.01172
107875883	-0.995352	-0.824855	-0.932935	-0.390712	-0.238398	-0.650134	-0.891241	-0.437903	-0.642842	-0.295793	-0.133457	-0.565256	-0.409921	-0.466755	-0.110916	-0.322528	1.52826	0.570345	-0.130014	0.146902	-0.369079	1.73474	2.39069	2.43715
107848092	-1.05106	-1.05111	-1.07448	-0.936724	-0.934731	-0.972292	-0.747255	-0.671176	-0.713738	0.1263	-0.42894	-0.215421	-0.134458	-0.0899999	-0.393647	1.27579	1.13692	0.973836	0.189863	0.131539	-0.112307	1.66262	2.30882	1.72166
107840182	0.71969	0.981052	0.471134	0.118189	0.432388	-0.27072	1.12099	0.738545	0.667634	-1.15274	2.72042	-0.675481	0.0248991	0.000299462	0.426838	-0.393773	0.4009	-0.599004	-0.158272	-0.450843	-0.0968046	-1.85302	-1.46515	-1.70717
107864635	-0.645396	-0.635491	-0.639048	-0.50676	-0.369405	-0.529234	-0.621696	-0.546684	-0.50447	-0.453995	-0.350609	-0.382567	-0.544843	-0.519919	-0.273952	0.110538	-0.363729	-0.110051	0.248016	0.32563	-0.124624	2.78517	2.08389	2.56922
107876012	-0.271181	-0.157202	-0.12436	-1.27378	-1.23092	-1.46845	-0.525477	-0.709161	-0.756975	-0.66947	-0.0411072	-1.31264	0.27758	0.628983	-0.352905	-0.119279	2.2877	1.35168	-0.764178	1.25672	0.694672	0.766098	1.21658	1.29708
107871372	0.37928	1.12663	0.610965	-1.1625	-1.24258	-0.964388	0.717026	0.712818	0.456324	-1.78327	0.515057	1.67169	0.349084	0.404716	0.747687	-0.0836731	-1.22763	1.20929	0.763874	0.328716	0.350979	-0.874245	-1.50465	-1.5012
107861956	-0.716454	-0.713997	-0.718332	0.385563	0.577588	0.220644	-0.717107	-0.701161	-0.720004	-0.181094	-0.0653702	-0.318284	-0.664769	-0.620434	-0.677515	-0.00352281	0.214606	0.516028	-0.686605	-0.656315	-0.64607	1.71815	2.6578	2.51665
107868477	0.843003	1.62901	1.02591	-1.27904	-1.27193	-1.63209	0.672756	0.585124	1.49843	-0.736568	1.80441	-0.199218	0.199255	0.286881	0.553855	-0.328694	-0.093386	-0.213961	-0.861401	0.165294	0.732055	-0.937692	-1.0988	-1.3432
107877808	-1.1582	-0.931566	-1.0878	1.30113	1.93961	1.27409	-1.14922	-0.540618	-1.06099	0.537643	-0.731496	-0.884618	0.0313635	-0.294252	-1.11731	0.0243041	-0.230519	0.664317	-0.47759	0.165754	-0.444787	1.17199	1.62087	1.37788
107870881	-0.648971	-0.418002	-0.592069	-0.797169	-0.758458	-0.913213	-0.531979	-0.360916	-0.283602	-0.489341	-0.253513	-0.690875	-0.0456389	0.165103	0.748032	-0.409905	-0.0646635	0.00362	-0.031661	-0.103958	-0.646891	1.75093	2.83094	2.5422
novel.4671	-1.03522	-1.05394	-1.01976	-1.04108	-0.99155	-1.07167	-0.859633	-0.614029	-0.70237	-0.515714	0.675806	-0.460129	0.0239263	0.00848623	-0.0240141	0.071573	2.02817	0.772545	0.257782	0.374725	-0.0167675	1.5623	1.99325	1.63731
107858876	-0.481931	-0.484822	-0.486058	-0.469418	-0.467675	-0.475988	-0.485501	-0.47732	-0.480104	-0.344963	-0.388717	-0.392053	-0.473949	-0.475058	-0.469786	0.275494	0.638514	-0.348522	-0.426481	-0.384935	-0.395278	2.62093	2.38577	2.48785
107859770	-0.778732	-0.69401	-0.804087	-0.541809	-0.419133	-0.64966	-0.834559	-0.436431	-0.627636	-0.295306	-0.353974	-0.346905	-0.150005	-0.254549	-0.508254	0.0402039	0.956466	0.312688	-0.26664	0.0917347	-0.557303	2.08715	2.51604	2.51471
107868305	1.30378	0.715432	1.09207	-0.361106	-0.154198	-0.143583	-0.000232874	1.56083	0.0343927	-1.29679	1.80689	0.332557	0.790488	0.122554	0.258637	-0.18209	-1.30157	0.202225	-0.275843	-0.628488	0.981112	-1.89523	-1.34001	-1.62182
107839047	-0.866534	-1.02354	-1.2636	0.439107	0.273685	0.684746	-1.01439	-0.410802	-1.24655	0.0767607	-2.22644	1.07635	0.216263	-0.0103955	-0.529573	1.16328	-0.0108292	-0.332243	-0.00480128	0.495041	-0.107308	0.812613	1.77759	2.03158
107851615	-0.723211	-0.730587	-0.724317	0.0135654	0.158266	0.154881	-0.721129	-0.714986	-0.724921	0.2862	-0.0768384	-0.190893	-0.696378	-0.705909	-0.724201	0.919159	0.606638	-0.0154694	-0.690181	-0.704605	-0.726536	2.1435	2.71087	1.87709
107879425	-1.36938	-1.35579	-1.34224	-0.787369	-0.782592	-0.892726	-0.652707	-0.68926	-0.479936	0.395919	0.186908	-0.123374	-0.137739	-0.189432	0.499349	0.573562	1.88739	0.498144	-0.185681	-0.132545	-0.216042	1.3766	1.93756	1.98138
107867463	-0.871647	-0.910314	-0.918078	-0.818196	-0.744735	-0.849918	-0.493057	-0.54469	-0.32062	-0.476757	-0.313152	-0.0565568	-0.367798	-0.395655	-0.15132	0.664067	1.88954	1.04292	-0.282535	-0.218558	-0.718826	1.87395	1.71397	2.26797
107839402	-0.360483	0.145509	-0.537839	0.22451	0.769148	0.102102	-1.19265	-0.136487	-0.822281	-0.735953	-1.67814	-0.994288	-0.426838	-0.230671	-0.892739	1.19067	-1.20002	0.896853	0.0874948	-0.17814	0.33596	1.97582	1.85016	1.8083
107875695	0.616699	1.03212	1.13921	-0.966711	-0.977962	-1.06988	0.563548	1.05275	0.9435	-1.38282	1.74337	-0.335542	0.626014	0.475618	-0.0215902	-0.385011	0.0310252	-0.253179	-0.0392733	-0.131898	1.65276	-1.24916	-1.58319	-1.4804
107863847	-0.853697	-0.75043	-1.04612	0.893776	1.26991	0.545653	-1.05438	-0.569297	-0.870181	0.753914	-0.0254633	-0.365635	-0.807911	-0.853786	-0.858156	0.722548	0.195525	1.03997	-0.944717	-0.999999	-0.611959	1.76222	1.71819	1.71002
107850429	-1.20283	-1.16859	-1.2247	-0.0817947	-0.0323223	-0.208558	-1.1061	-1.0113	-0.961336	0.331348	1.04674	1.27118	-0.838905	-0.631453	-0.800615	1.35412	1.18186	0.685777	0.0396701	-0.265723	-0.534267	0.537554	1.78986	1.8304
107862256	1.11615	1.5084	0.956089	-0.691145	-1.07331	-0.707907	0.433963	1.11882	0.681133	-0.255044	2.18706	-0.202865	-0.320201	-0.295591	0.363564	-0.841121	0.80077	-0.769863	-0.297991	-0.53831	1.03969	-1.37436	-1.4487	-1.38923
107859239	-1.32823	-1.25532	-1.20253	-0.229622	-0.304786	-0.350146	-0.955473	-0.965896	-0.946581	0.552592	0.171479	0.0371847	-0.489626	-0.236028	-0.678364	0.838648	0.842954	1.17124	0.15451	-0.0786131	-0.489496	1.78201	1.83878	2.12131
107870725	-1.49703	-1.30945	-1.43937	-0.329295	-0.206364	-0.107469	-1.33753	-1.04826	-1.12551	-0.0716888	0.372052	0.41954	0.0711157	0.0471283	-0.479263	0.457318	1.87131	1.11867	0.628982	0.211295	-0.559327	1.08937	1.60223	1.62154
107842375	0.758327	0.779086	0.608461	-0.272146	-0.263925	-0.633983	0.843778	0.848844	0.496395	-0.65067	1.44714	0.0694046	1.21607	1.15269	0.163025	-1.26703	-0.486887	-0.630446	0.244958	0.208926	0.985761	-1.76287	-1.84513	-2.00978
107877723	-0.768702	-0.791229	-0.791259	-0.371159	-0.399022	-0.270679	-0.733042	-0.713903	-0.745986	-0.079317	-0.00976192	0.168582	-0.486712	-0.416567	-0.578626	0.508466	0.821217	0.150111	-0.458088	-0.430734	-0.619693	2.03392	2.24574	2.73645
107861619	-1.09321	-0.766221	-0.977361	-0.253835	0.018163	-0.330568	-1.10919	-0.760277	-0.935805	-0.930473	0.551385	-0.692894	-0.327968	-0.244826	-0.693398	0.244627	0.94716	0.744389	0.686889	0.419263	-0.560582	1.65826	1.90741	2.49906
107850768	-0.297741	-0.255018	-0.350931	-0.479974	-0.384118	-0.561342	0.254198	-0.184645	-0.122519	-0.589393	-0.642852	-0.562276	-0.471527	-0.479201	0.44296	-0.312868	-0.522681	-0.39798	-0.509147	-0.387038	-0.569414	1.87542	2.40619	3.1019
107850974	-0.562085	-0.519848	-0.550617	-0.478993	-0.369116	-0.457478	-0.515214	-0.397645	-0.300335	-0.408023	-0.192965	-0.226431	-0.492869	-0.498019	-0.409905	0.028731	0.0483085	-0.444755	-0.232387	-0.179784	-0.444744	2.75767	2.05323	2.79327
107851294	-0.483107	-0.485414	-0.504239	-0.457371	-0.421346	-0.466297	-0.500803	-0.467987	-0.468082	-0.489408	-0.266936	-0.483804	-0.460286	-0.46473	-0.424424	0.0149394	0.562274	-0.227169	-0.356608	-0.303085	-0.410575	2.51744	2.4956	2.55141
107876061	0.230685	0.232509	-0.0717034	0.448205	0.344033	0.107819	-0.740787	0.116715	0.0783198	-1.41874	1.05582	-1.13748	-0.636725	-0.377403	-0.624494	-0.799426	-1.28925	-0.39464	-0.517744	-0.373173	-0.269839	1.14053	2.89659	2.00019
107878241	-0.98277	-0.397088	-0.338599	0.717442	1.02083	2.74759	-0.996608	-0.21951	0.426924	-0.12263	-1.96377	-0.422688	0.163936	-0.774526	-0.485009	-0.908678	-0.212122	-0.450588	0.985925	-0.67788	-0.130871	1.44577	0.20991	1.365
107862630	-0.34822	0.0411321	-0.237902	-0.867642	-0.813097	-0.663189	-0.27888	-0.164362	-0.351478	-0.0320792	-0.759263	0.00527163	-0.459485	-0.272248	0.125397	-0.0147076	-0.133248	-1.15556	0.172518	-0.56308	-0.421578	2.26597	1.86454	3.06119
107840369	-0.441775	-0.442488	-0.442509	-0.433389	-0.427285	-0.43861	-0.441395	-0.434035	-0.431345	-0.404971	-0.355568	-0.388995	-0.440354	-0.441919	-0.439336	-0.0492419	0.249827	-0.0833447	-0.43573	-0.430574	-0.438459	2.04754	2.94194	2.60201
107848312	-0.732281	-0.826918	-0.855908	0.0126364	0.103607	0.113069	-1.07581	-0.686553	-0.946922	-0.378907	0.749339	-0.910297	0.617042	0.535637	-1.15316	-0.112876	1.40764	2.19195	-1.19459	0.447693	-0.941661	1.05624	0.513438	2.06759
107859886	0.994096	1.44571	0.354359	0.343073	1.14461	-0.0634571	0.448287	1.17857	0.460257	0.168649	0.886728	-0.784508	-0.0931762	0.324088	0.394229	-0.967258	-0.943022	-0.579999	0.806532	-0.275	0.640359	-2.08978	-1.9403	-1.85304
107862088	-0.66612	-0.684242	-0.692535	-0.647066	-0.647182	-0.670215	-0.56059	-0.467366	-0.498477	-0.467029	-0.607839	-0.335254	-0.328343	-0.277199	0.0311282	-0.112429	0.36309	-0.234099	-0.0210727	0.161197	-0.0579289	2.3057	2.42686	2.68701
107877738	-0.45804	-0.463362	-0.491697	-0.389472	-0.347375	-0.404095	-0.43308	-0.35268	-0.34321	-0.482337	-0.19508	-0.340851	-0.419451	-0.402668	-0.129652	-0.221726	-0.261466	-0.286006	-0.343618	-0.384323	-0.425554	1.7474	3.05939	2.76895
107875699	-0.65991	-0.650731	-0.708129	-0.608626	-0.56731	-0.602531	-0.693299	-0.572919	-0.596943	-0.552612	-0.569283	-0.552434	-0.202035	-0.19868	-0.349564	-0.298659	0.351465	-0.261641	0.639802	0.642689	-0.112138	1.97432	2.50078	2.64838
107871402	-0.771563	-0.840596	-0.806185	-0.515586	-0.578748	-0.559942	-0.772019	-0.732607	-0.758901	-0.308741	-0.426107	-0.021249	-0.52752	-0.496241	-0.47694	2.1754	0.0499483	0.524861	0.862317	-0.269341	-0.559467	1.98184	1.86772	1.95966
107859569	0.761907	1.22085	0.715252	-0.160397	0.0782564	-1.1305	0.422173	1.12196	0.604008	-1.3675	1.70658	-1.2646	0.423718	-0.129978	0.300043	-0.817145	-0.684983	2.17486	-0.289276	-0.116616	0.0328824	-1.67354	-0.883175	-1.04477
107864303	-1.14788	-0.961094	-1.05513	0.367784	0.750667	0.170137	-1.12989	-0.575359	-0.829127	-0.587282	0.22655	-1.07948	-0.583561	-0.546449	-0.65404	0.609388	-0.0795411	0.515528	0.552366	0.00408019	-0.212053	2.10494	2.03586	2.10359
107863335	0.226598	-0.401803	-7.28661e-06	-0.85212	-1.40932	-0.455173	-0.0616458	-1.13004	-0.153123	0.501829	-0.634172	0.803317	-0.510782	0.234427	-0.420924	-1.03171	0.595585	-0.474413	0.162751	-0.20472	-0.916355	0.985878	2.63011	2.51582
107870128	-0.56412	-0.643395	-0.627539	-0.251191	-0.369557	-0.377552	-0.89455	-0.261103	-0.288207	1.93467	-0.405132	-0.76797	-0.664642	-0.764394	-0.413378	-0.0688445	-0.185022	0.133685	-0.661855	-0.151535	-0.18495	1.68032	2.46502	2.33124
107878096	-0.504162	-0.330758	-0.578852	-0.231468	-0.0412638	-0.383483	-0.770982	-0.50523	-0.581067	-0.321855	-0.0586109	-0.577101	-0.78732	-0.736071	-0.491016	0.126425	1.47141	0.186366	-0.682473	-0.676187	-0.381177	2.09023	2.20228	2.56236
107880039	-0.730414	-0.865194	-0.829826	-0.358158	-0.363842	-0.481309	-0.840666	-0.679628	-0.570718	-0.343006	0.453251	-0.105953	-0.516908	-0.521298	-0.560289	-0.125764	0.600681	0.356471	0.370028	-0.140823	-0.732849	1.93482	2.24627	2.80512
107866760	-0.896563	-1.40404	-0.721273	-0.380117	-0.729056	-0.0629212	-0.00983854	-1.24987	-0.202187	2.08945	-1.13234	1.33922	-0.792328	-0.549649	0.525394	0.176864	-0.459525	-0.323442	0.314251	0.517711	-0.713463	1.1391	1.90747	1.61715
107861598	-0.55891	-0.896692	-1.15186	0.829583	0.747831	0.377481	-0.864161	-0.921059	-0.671137	1.29476	-0.935027	0.0704368	-1.1057	-1.12033	-0.0806234	1.01524	0.321673	0.950909	-0.697027	-0.836528	-0.714253	1.28941	1.80046	1.85553
107861884	-0.607348	0.581813	-0.264599	0.296387	0.31269	0.0208402	-0.519254	0.705247	0.231894	-0.51232	2.9985	0.123948	-0.0852082	0.496798	-0.446013	-0.424789	-0.665003	1.26755	0.29758	-0.0888796	1.08985	-1.42265	-1.36156	-2.02547
107858739	-1.05986	-1.0405	-1.16592	0.8884	0.874817	1.00963	-1.09939	-0.911382	-0.970276	-0.197214	-0.140424	-0.33856	-0.474263	-0.374248	-0.864165	0.0548812	0.5838	-0.196966	-0.0062404	0.175652	-0.670287	1.84832	1.94648	2.12771
107847730	1.54258	0.803984	0.312941	1.58522	1.07816	0.859126	0.259384	0.536788	0.286265	-1.10166	0.667084	-0.0433047	-0.389353	-0.249116	0.513607	-1.16318	-0.935418	-1.78531	0.300703	-0.0282231	1.11922	-1.41636	-0.969039	-1.7841
107859424	0.620989	0.0852176	0.368619	1.18601	0.597373	1.03104	-0.74709	-0.803048	-1.03783	0.298414	0.209027	-0.629044	1.45663	1.8308	-1.24847	0.531911	-0.782773	0.860456	0.23983	0.721775	-0.0574215	-1.51892	-1.36619	-1.84729
107848011	-1.35107	-1.17207	-1.36031	-0.144934	-0.137489	-0.147161	-1.10061	-0.983701	-1.17163	-0.337811	1.89087	0.870933	-0.481307	-0.309019	-0.808011	1.29478	1.9201	0.259465	0.77513	-0.0705013	-0.273855	0.768047	0.854719	1.21543
107870506	-0.143907	-0.200294	-0.331987	-0.759468	-0.689658	-0.799253	0.0977463	0.0237881	-0.0853943	-0.824729	-0.776051	-0.347534	-0.371194	-0.388943	1.8935	0.0664221	-0.886838	-0.704441	-0.35019	-0.142188	-0.626704	1.52706	2.22223	2.59803
107843788	-0.42711	0.139322	0.949138	-1.27991	-0.828621	-1.19853	1.28159	1.19085	0.917287	-1.53039	0.947959	0.425786	0.839864	0.542994	0.164852	0.160826	-1.36143	1.16214	0.334396	0.77271	0.682756	-0.836485	-1.64488	-1.40509
107870701	-0.976993	-0.70937	-1.1776	-0.455611	-0.320664	-0.787901	-1.00962	-0.200082	-0.638427	0.568196	0.264399	0.180074	-0.698762	-0.66348	-0.489018	0.650138	1.01513	-0.374788	-0.285802	-0.547288	0.328774	1.49106	2.69906	2.13857
107862123	1.02925	1.52571	1.70459	-0.167469	-0.109996	0.385085	0.893139	1.04722	1.23427	-0.475431	0.386283	-0.330402	-0.552561	-0.226706	-0.21286	-0.634161	-0.835964	-0.0691138	-0.0646959	0.159406	0.869379	-1.90684	-1.69582	-1.95232
107862391	-0.578331	-0.658591	-0.692478	0.134407	0.036989	-0.0194668	-1.1469	-0.895643	-1.05857	0.521713	-0.192585	-0.518183	-0.716143	-0.736588	-0.933819	1.28077	2.00008	0.631956	-0.542117	-0.388034	-0.7184	1.64912	1.76038	1.78043
107850776	-0.723636	-0.722674	-0.726708	0.582473	0.30921	0.230963	-0.784552	-0.548615	-0.555762	-0.527283	-0.360999	-0.301083	-0.577808	-0.575899	-0.764855	-0.169454	0.532491	0.275932	-0.492413	-0.46831	-0.629454	1.82264	2.5841	2.5917
107870275	0.870046	1.52679	1.3318	0.417653	0.270894	-0.297867	0.156295	1.18002	0.279102	-0.873349	1.66812	-0.991652	-0.403623	-0.273143	-0.1236	-0.523835	-0.510525	0.584702	0.0756039	-0.949569	1.3984	-1.57976	-1.43541	-1.79709
107878834	-0.503949	-0.0709217	-0.22765	-0.0146726	-0.395717	0.0171592	-1.23944	0.121336	-0.483836	0.820538	-0.504786	-1.08078	-1.04827	-0.7777	-0.353036	0.0655397	-1.87228	1.2196	0.183739	-0.358422	1.51867	1.87254	2.26576	0.846582
107871181	-0.462793	-0.326673	-0.608772	0.91186	1.18054	0.609348	-0.866259	0.254167	-0.328468	0.756307	-0.693855	-0.661021	-0.721455	-0.835855	-0.82902	0.139522	-0.316808	-0.280451	-1.3854	-0.933095	-0.607333	1.94882	2.09434	1.96236
107862846	-0.648192	-0.651326	-0.664557	-0.486761	-0.38384	-0.565264	-0.596749	-0.610897	-0.580444	-0.534328	0.77255	-0.376715	-0.413764	-0.344267	-0.374663	-0.235678	0.189632	-0.0999408	0.0140866	-0.246654	-0.476437	2.03419	2.53304	2.74697
107852276	0.553946	1.0325	0.370621	-0.209854	0.235683	-0.386487	-0.441733	1.14957	-0.0458218	-0.195095	0.407438	-0.899111	1.30177	1.64246	-0.742268	-0.44649	-0.651484	0.0181248	0.21548	0.324002	1.97922	-1.65009	-1.7292	-1.83319
107839357	-1.7401	-0.870388	-0.740711	0.952192	1.34644	0.342129	-1.4549	-0.72729	-0.946863	0.43353	0.680642	-1.32441	-0.641568	-0.125819	-1.05896	-0.352186	0.390822	0.15683	1.13925	-0.474206	1.2961	0.996101	1.61493	1.10844
107863186	-0.356723	-0.64688	-0.67947	0.0140779	-0.0789418	0.311909	-0.693651	-0.909517	-0.273605	0.854883	0.033857	1.29321	-1.71339	-1.58011	0.0404044	0.853951	0.705846	-0.274396	-0.723374	-1.06843	-0.363024	1.63224	2.22733	1.39381
107871458	-1.29712	-0.608638	-1.11702	-0.0949056	0.134002	-0.164159	-0.990483	-0.0948892	-0.505219	0.152045	0.250713	-0.93038	-0.718172	-0.583779	-1.27007	0.724856	1.11906	0.44282	-0.462567	0.27227	-0.175515	2.17094	2.56453	1.18168
107842997	-0.696491	-0.514927	-0.740135	-0.0269661	0.37607	-0.300212	-0.717666	-0.516889	-0.598786	-0.431624	-0.338233	-0.502772	-0.852403	-0.736561	-0.453998	-0.238336	1.74469	0.105852	0.0381669	-0.142734	-0.927271	1.84602	1.99436	2.63083
107845798	-0.584082	-0.793939	-0.944571	0.678089	0.711266	0.831803	-0.966953	-0.38054	-0.853986	0.425875	-1.35961	-0.542674	-0.706515	-0.811324	-0.426308	0.703591	0.16417	-0.153681	-0.573746	-0.200565	-0.395494	1.69402	2.18541	2.29976
107868284	-0.712942	-0.696497	-0.711239	-0.494759	-0.435813	-0.58323	-0.704183	-0.589786	-0.611212	-0.335948	-0.141775	-0.175984	-0.504668	-0.484819	-0.475586	-0.10845	0.996936	0.078637	0.0200195	-0.0188723	-0.498847	2.15769	2.35058	2.68075
107845282	-0.878714	-0.937292	-0.951171	-0.532482	-0.483241	-0.585691	-0.814094	-0.730636	-0.594291	-0.590853	0.968642	0.297335	-0.610099	-0.512992	0.23692	0.187219	0.785361	-0.0181723	0.334058	-0.27527	-0.787977	1.78314	2.01312	2.69718
107870119	-0.581529	-0.605422	-0.633906	-0.620831	-0.590884	-0.633352	-0.722341	-0.652494	-0.656514	-0.0413483	0.138416	0.252408	-0.729729	-0.702334	-0.704715	1.53554	2.19983	0.906182	-0.703673	-0.752269	-0.598976	1.29833	1.5084	2.09121
107842913	-0.476657	-0.515508	-0.542074	-0.657734	-0.682384	-0.653131	-0.556928	-0.34296	-0.245731	-0.60065	-0.362561	-0.558985	-0.355601	-0.275723	0.0302843	-0.373533	1.13085	0.0795967	0.00924658	-0.333874	-0.479911	3.19663	1.06112	2.50622
107855066	0.0220493	-0.437276	-0.148135	-1.01107	-1.08027	-0.608803	-0.340895	-0.986165	-0.187766	0.957976	-0.231506	2.12278	-1.31498	-0.988893	0.938416	0.860668	0.294659	-1.26552	-0.245933	-0.625616	-0.308207	1.35068	1.68094	1.55287
107850386	-0.709936	-0.756165	-0.752141	-0.527149	-0.512854	-0.51387	-0.656157	-0.576192	-0.562238	-0.568503	0.0614071	-0.182615	-0.422362	-0.362099	-0.124588	0.184009	0.128266	-0.258818	0.0401327	0.0444072	-0.363366	2.00896	2.59495	2.78692
107862547	-0.811524	-0.778272	-0.712244	-0.448777	-0.353097	-0.56398	-0.750477	-0.394772	-0.599968	-0.390138	-0.27811	-0.583292	-0.2466	-0.241776	0.106922	-0.151233	0.504681	0.0898594	-0.256823	-0.00576612	-0.501025	2.21131	2.68863	2.46647
107860268	-0.915635	-0.912666	-0.925424	-0.305289	-0.147953	-0.292046	-0.877372	-0.736125	-0.755672	-0.323378	-0.213927	-0.00125427	-0.507762	-0.444911	-0.655166	0.772551	0.723265	0.0689547	0.249539	-0.264837	-0.438475	2.1918	2.35352	2.35826
107862997	-1.11001	-1.24176	-0.92122	-1.27161	-1.06449	-1.11278	0.0568593	-0.77019	0.364692	0.677947	0.880442	0.338112	-0.151684	-0.137322	0.751752	-0.378858	0.972533	0.157869	0.388177	0.1743	-1.46827	1.11248	1.17939	2.57363
107875256	-0.00169264	0.851127	-0.0806509	0.146882	0.386624	-0.114566	-0.673743	0.820199	-0.0811338	-1.58544	1.95726	0.85673	0.0158059	0.18103	0.14342	0.340971	-1.66752	1.09733	0.874458	-0.687641	1.4808	-1.4195	-1.07512	-1.76563
107864525	-0.806585	-0.850477	-0.711181	0.172872	-0.00724253	-0.0451186	-1.19625	-0.722877	-0.841468	-0.704881	-0.576923	-0.119031	-0.581672	-0.419594	-0.418582	-0.643406	0.723456	-0.222817	0.431781	0.70262	0.167725	1.96838	1.98153	2.71974
107847542	-1.31703	-1.03278	-1.4434	-0.399403	-0.02575	-0.365516	-1.31321	-0.572942	-0.95683	-0.462631	-0.451668	-0.140933	-0.294317	-0.0767006	-0.320574	1.10567	0.543048	0.796915	0.382352	0.405529	0.0315981	1.72321	2.21085	1.97451
107861863	-0.0920958	-0.0588566	-0.359706	0.858522	0.899427	1.04526	-0.816668	-0.167842	-0.373295	0.111455	-1.76084	-0.872503	-1.14746	-0.995757	0.238649	-0.516508	-0.361215	-0.601214	-0.271424	-0.471256	-0.0175765	1.08336	2.08095	2.56659
107843779	-0.927929	-0.23619	-1.0046	0.197699	0.504402	0.0482097	-1.17016	-0.421667	-0.806435	-0.117163	-0.494849	-0.883948	-0.778112	-0.633943	-0.415571	0.521685	-0.555838	-0.0719421	0.00372742	-0.197491	0.757336	2.0902	2.64772	1.94486
107842594	0.277864	0.735725	0.0806355	0.480208	0.65074	-0.139144	-0.431933	0.857951	-0.0171034	-0.816731	2.07855	-0.40144	1.13777	1.45942	-0.752085	-0.548474	-1.24792	0.282712	0.107484	0.0343483	1.1679	-1.63992	-1.71466	-1.64189
107848367	0.142056	0.881555	0.9388	-0.882252	-0.958788	-0.907481	0.0356929	1.00079	0.140473	-1.37267	1.81233	-0.361618	0.614175	1.08092	-0.119236	-0.200738	-0.39436	0.267237	1.13186	-0.316835	1.75043	-1.25728	-1.35554	-1.66951
107843084	-0.638576	-0.658422	-0.626767	-0.620345	-0.623999	-0.570249	-0.391543	-0.544055	-0.539652	-0.395568	-0.429791	0.33456	-0.333298	-0.297481	-0.361248	0.737528	0.0501252	-0.173942	-0.448586	-0.220285	-0.492825	2.44809	1.86064	2.93569
107875923	-1.20195	-1.17128	-1.15731	-0.0221198	0.651298	-0.0754985	-0.9946	-0.868498	-1.01704	-0.606085	0.984481	-0.637178	-0.0455677	-0.168143	-0.145539	-0.0403767	1.99746	0.128457	-0.333942	0.363163	-0.650199	1.12157	1.52733	2.36155
107878221	-0.999624	-1.06674	-1.0358	-0.902404	-1.02852	-0.886255	-0.450566	-0.761179	-0.562514	-0.0964035	0.0610647	0.484497	-0.586995	-0.354694	0.19662	0.404674	1.96872	-0.205024	0.560881	0.0615158	-0.434665	1.67218	2.13203	1.82921
107847538	-1.27531	-1.31536	-1.39063	-0.317298	-0.146303	-0.418664	-0.612153	-0.815945	-0.767141	0.0465152	0.047282	0.272507	-0.733671	-0.585071	-0.628171	0.894405	1.1759	1.19921	-0.0140638	0.189977	-0.367199	1.42546	2.23126	1.90447
107850108	-0.302345	-0.739163	-0.816051	-0.798607	0.425327	-0.794351	-0.669139	-1.26094	-1.25914	-0.907672	0.782192	-0.0188553	-0.561478	-0.785889	-0.494937	2.23762	0.576873	1.84988	1.77728	-0.706972	0.806793	0.438425	0.627125	0.594016
107850061	-1.24019	-0.860933	-1.10921	1.08387	1.41519	0.994705	-1.4592	-0.872704	-0.731571	0.555028	-0.782145	-0.996869	-0.34034	-0.472078	-0.637054	-0.131198	0.285522	0.377065	-0.0710121	0.45038	-0.48807	1.41789	1.89372	1.71921
107848125	-1.38558	-1.16975	-1.41258	-0.401301	-0.230481	-0.648595	-1.12878	-0.876532	-1.0489	-0.697987	1.6214	-0.200415	-0.198804	-0.190906	-0.818982	1.49162	1.34636	1.31173	0.957729	0.348205	0.244226	1.04386	1.01891	1.02557
107838852	1.6704	1.42752	0.833399	0.704514	0.359295	1.05554	0.707989	0.838162	0.504198	-0.327656	-1.77554	-0.0860862	-0.223804	0.0404289	-0.00393158	0.195435	-1.24491	-1.25723	-0.476742	-0.0452558	1.29826	-1.37494	-1.32777	-1.49127
107860290	-0.649881	-0.655386	-0.637055	-0.572136	-0.588701	-0.61589	-0.552925	-0.303706	-0.261806	-0.408745	-0.436049	-0.545984	0.345696	0.0874125	-0.425489	-0.477701	0.0143859	0.108631	-0.342568	0.193894	-0.584899	1.84075	3.03663	2.43153
107875462	-0.960414	-0.42395	-0.836335	1.5458	2.29723	1.31057	-1.27139	-0.0589667	-0.736138	0.52097	-0.744395	-1.30304	-0.27325	-0.471405	-1.16899	-0.0607185	-0.30247	-0.0697726	-0.832221	0.370409	-0.173813	1.00029	1.40664	1.23536
107843677	-0.610442	-0.784547	-0.858572	-0.962667	-0.903601	-1.01875	-0.274764	-0.464679	-0.26819	-0.789146	-0.511638	-0.0450519	-0.348999	-0.3141	0.423597	0.0734558	1.40618	-0.0244751	-0.0343635	0.540685	-0.678272	1.81892	2.518	2.11142
107842772	-1.10602	-0.330267	-1.00718	0.199095	0.494662	0.202229	-1.38448	-0.613551	-0.981148	0.395797	0.809739	-0.396421	-1.10176	-1.18432	-0.86179	1.41363	0.501774	0.349854	-0.257781	-0.80278	0.306806	1.82212	1.69874	1.83305
107842902	-0.803551	-0.941059	-0.862336	-0.902866	-0.959242	-0.931005	-0.617692	-1.0853	-0.805851	0.474248	0.139711	1.41601	-0.420981	-0.339427	0.0616688	0.0090791	2.7035	0.0258515	0.16164	0.414945	-0.640173	0.986726	1.1225	1.79359
107863148	-0.867015	-0.799198	-1.03733	0.710959	0.736819	0.555549	-0.895651	-0.853196	-0.777233	0.19377	-0.249088	0.380864	-0.670236	-0.690141	-0.777936	0.661357	-0.108699	0.174636	-0.822624	-0.382051	-0.799897	1.9765	2.147	2.19284
107866534	-0.638053	-0.334404	-0.826411	0.0301225	0.498343	-0.443111	-1.28367	-0.0995011	-0.0727549	0.248488	-0.852972	-0.506221	-1.61597	-1.39513	0.369369	1.49404	-0.317846	0.59776	0.134449	-0.872542	0.340422	1.57721	1.95044	2.01794
107854094	-0.707248	-0.754293	-0.701419	-0.291846	-0.222717	-0.13537	-0.659738	-0.744484	-0.73112	0.0763735	-0.728564	0.806613	-0.437811	-0.390409	-0.616918	0.208365	-0.113677	0.331728	0.110382	-0.450613	-0.726001	1.56949	2.21671	3.09257
107850304	-0.867565	-0.704727	-0.991328	-0.443594	0.204915	0.016831	-0.047931	-0.495336	-0.911825	0.388536	-0.239676	-0.460825	-0.487732	0.0854988	-0.662075	1.35225	3.0861	-1.74644	-0.616203	0.122716	0.300716	0.958216	0.757367	1.40211
107840186	1.44463	0.513944	1.05138	0.69588	-0.347684	0.823992	0.466625	-0.228049	-0.0108257	1.57426	-1.49234	0.419382	-1.06898	-0.638574	0.41933	-0.35593	-0.84676	-1.63401	0.985749	-0.632955	1.84905	-0.773222	-0.992921	-1.22197
107873497	-1.15064	-1.14153	-1.09471	-0.914943	-0.910638	-0.978893	-0.897715	-0.46029	-0.409779	0.16496	0.639528	0.243592	-0.266834	-0.187788	-0.150973	-0.0350242	2.20106	1.212	-0.187127	-0.176094	-0.320027	1.02758	1.92798	1.86632
107878497	-0.0306206	0.701994	-0.108679	0.229084	0.182465	0.256989	-0.475062	0.534107	-0.151943	-0.816249	-1.73753	-1.50473	-0.542847	-0.427938	-0.407734	-1.14573	-0.120215	0.245963	-0.796339	-0.620596	0.861924	1.3829	2.05937	2.43142
107872225	-0.836905	-0.842048	-0.890665	-0.234233	-0.168641	-0.31937	-0.904637	-0.634875	-0.696308	-0.247072	-0.193022	-0.21661	-0.639641	-0.60396	-0.625635	0.501215	1.11051	0.377562	-0.171965	-0.14178	-0.453169	2.0717	2.1624	2.59715
107876791	0.718711	0.66681	1.73285	-0.654225	-0.924846	-0.629491	-0.228012	0.259623	-0.371286	-1.1486	2.39888	-0.0421435	0.161859	0.116511	0.411333	-1.26562	-0.244048	1.30179	0.791512	-0.323731	0.894621	-0.770133	-1.79076	-1.0616
107859750	-1.54298	-1.13976	-1.50546	-0.48321	-0.464094	-0.553276	-1.29469	-0.453269	-0.854677	0.413705	-0.298976	0.462253	-0.183534	0.0950821	-0.247378	0.260502	2.64978	0.262897	0.784792	0.229404	-0.0640075	1.00873	1.49159	1.42658
107859482	-1.24048	-1.15706	-1.38789	-0.907511	-0.439486	-0.788695	-1.17274	-0.800872	-0.919809	-0.669699	1.45282	0.273725	-0.460202	-0.103664	-0.289007	1.05573	2.09963	0.853074	1.42683	0.501603	0.122928	0.740938	0.820015	0.989823
107859831	-0.4759	-0.230334	-0.355558	0.730145	1.54866	0.775623	-0.489991	0.368681	-0.328392	0.484406	-1.55564	-1.4161	0.0219811	-0.403382	-0.707538	-1.05036	-0.523669	-0.802936	-0.899653	0.566446	-0.504042	1.31548	1.52689	2.40519
107847769	0.106092	0.580728	-0.26457	0.37789	0.940912	-0.238625	0.633687	1.33706	-0.191857	-0.388382	-0.506653	-0.510475	0.572179	0.684253	-0.696546	0.710046	-0.0780457	-0.487927	0.888252	0.928844	1.62673	-1.97679	-1.72414	-2.32266
novel.5740	-1.02206	-1.02977	-1.01569	-0.949912	-0.961399	-0.97294	-0.913353	-0.819929	-0.816527	-0.789151	1.4585	-0.222958	0.0664878	0.07231	-0.0651243	-0.016101	1.98127	0.986237	1.73911	0.421947	-0.399012	1.07121	0.722497	1.47435
107873659	-0.476249	-0.290322	-0.616941	0.351866	1.45182	-0.140908	-0.974582	-0.0728683	-0.328625	0.984149	-0.491711	-2.1995	0.0555946	-0.113048	-0.913271	0.320176	-0.381473	0.434799	-1.75379	-0.30663	1.07303	1.13583	2.24171	1.01093
107861649	-0.650936	-0.713335	-0.915816	-0.524417	-0.617848	-0.540703	-0.393803	-0.155416	-0.130329	-0.190019	-1.58477	-0.2968	-0.427992	-0.176342	0.335286	-0.339898	-0.139786	0.206762	-0.0743877	0.229655	0.138871	1.96605	1.98787	3.0081
107853798	-1.14263	-1.03379	-1.25568	0.510083	0.394045	0.246819	-1.02286	-0.538728	-0.894184	0.446802	-0.113842	-0.166372	-0.776243	-0.678079	-0.959473	0.790173	1.375	0.920525	-0.486418	-0.641045	-0.445072	1.69258	1.92402	1.85436
107866948	-1.0543	-0.658545	-1.08192	-0.00451986	1.03486	-0.839515	-0.000995904	-0.100565	-0.239096	-1.68851	-0.408069	-1.00976	0.320959	0.369329	0.476753	0.467851	-0.901104	0.716618	-0.307263	0.0491376	-0.681463	1.03514	1.699	2.80599
107878522	-0.91448	-0.852362	-0.997017	0.802357	0.893529	0.609105	-1.11151	-0.796906	-0.957305	0.4979	-0.64697	-0.213741	-0.681888	-0.685531	-0.860944	0.799615	0.592939	0.497118	-0.694755	-0.462117	-0.553396	1.51956	2.19318	2.02362
107858462	0.525404	2.10142	0.744121	0.305797	0.305113	-0.368524	-1.43101	0.579524	-0.340738	-0.0661748	1.95444	-0.395116	0.231162	-0.0497882	-0.293425	-0.968797	0.356761	0.503151	-0.412387	-0.312293	1.47511	-1.40378	-1.04255	-1.99743
107858875	-0.429931	-0.438093	-0.438935	-0.417219	-0.404563	-0.421744	-0.437009	-0.432871	-0.428889	-0.4275	-0.378849	-0.416819	-0.433704	-0.432823	-0.402267	-0.220361	0.423764	-0.359602	-0.389584	-0.376803	-0.386646	2.49328	2.58283	2.57434
107864428	0.646339	0.398631	1.05969	1.0105	0.935842	0.744462	-0.0698922	0.971623	1.09353	0.953778	-0.71205	0.587558	0.455161	0.382084	-0.283013	-0.41613	-1.75405	-0.178423	-0.28346	-0.290392	0.431747	-1.63569	-2.08936	-1.95848
107847801	-1.06073	-0.957635	-0.845323	0.403568	0.882168	0.063345	-0.837498	-0.241734	-0.467219	-0.440287	0.294237	-0.564967	-1.00303	-1.0506	-0.768257	0.675485	0.0689214	0.604245	-0.270008	-0.576652	-0.301956	2.23603	1.91514	2.24276
107878852	-1.11343	-1.06945	-1.22459	0.768442	0.825007	1.02201	-0.97707	-0.908872	-0.955176	-0.62582	-0.430374	0.0120563	-0.561983	-0.433248	-0.146019	0.160397	0.429076	0.129755	-0.544935	0.0913518	-0.447229	1.58734	2.30251	2.11025
107843494	1.35513	0.714962	1.34415	0.926685	0.511019	1.30501	1.05056	0.0938059	0.771508	1.43126	-1.56354	0.679419	0.10182	-0.13967	0.00434236	-0.744294	-0.847385	-0.505201	-1.6474	-0.625942	-0.68011	-1.1879	-0.991556	-1.35668
107862785	-0.802276	-0.820543	-0.823536	-0.23997	-0.0487365	-0.144978	-0.827404	-0.78956	-0.796887	-0.0494705	1.58436	0.461192	-0.702854	-0.767847	-0.717638	-0.0459211	1.30652	1.15968	-0.717519	-0.739726	-0.83986	1.39622	2.07967	1.88709
107864057	-0.745611	-0.84389	-0.920521	0.643288	0.46709	0.962609	-0.906338	-0.998304	-0.859108	0.647349	-0.285452	0.560633	-0.962228	-0.910403	-0.839597	1.00098	0.983055	-0.597939	-0.589372	-0.4981	-0.696624	1.52643	1.5431	2.31895
107864654	-1.40902	-0.899865	-1.05227	-0.107179	0.191442	-0.0657456	-0.989075	-0.154329	-0.893904	-0.634812	0.912832	-0.223742	0.127333	-0.130046	-1.15505	0.818463	-0.953881	2.32918	2.04101	0.0296339	-0.587989	1.47392	0.588349	0.744742
107861680	-0.804548	-1.25643	-1.01902	0.0591615	0.448893	0.348468	-0.652342	-0.929015	-1.01622	-0.171524	0.117146	-0.378154	-0.792891	-0.689197	-0.343197	-0.0925648	0.0968581	1.34163	0.87691	-0.280773	-0.885401	1.82506	1.88439	2.31277
107875322	-1.0227	-1.01866	-1.01677	-0.479302	-0.459157	-0.570302	-0.892479	-0.979162	-0.940499	0.358455	0.471536	1.02858	-0.575052	-0.470531	-0.691555	1.03529	2.01213	1.2985	-0.281103	-0.591325	-0.592779	1.26533	1.48802	1.62354
107848548	0.62193	1.02622	0.802523	-1.49462	-1.38363	-1.41291	-0.176105	0.465506	0.181253	-1.09872	0.802494	-1.22383	-0.303989	0.152107	-0.312803	0.6834	1.75833	-0.624157	-1.40554	-0.5616	0.0186614	1.53085	0.510908	1.44373
107840245	-1.03279	-0.866788	-0.923666	-0.253502	0.150375	-0.654135	-0.96196	-0.664164	-0.650334	-0.209189	1.16514	-0.319027	-0.595653	-0.48806	-0.0852247	-0.0185466	1.19514	1.71538	-0.489765	-0.657958	-0.789589	1.29132	2.02615	2.11685
107862004	-1.2905	-0.621296	-1.10102	-0.440618	0.065041	-0.917568	-1.82293	-0.0245666	-0.75327	-0.832494	0.700865	-0.707804	0.159612	0.219269	-0.529929	0.025204	0.594285	1.80816	-0.429571	0.243266	0.72295	1.2338	1.77307	1.92605
107847901	-1.05666	-0.882623	-1.12846	0.747714	0.522892	1.26853	-1.02538	-1.03853	-1.10482	0.413843	-1.14923	-0.277791	-0.390772	-0.626255	-0.920095	0.787566	-0.473506	-0.796554	0.992095	0.483605	1.94247	1.26515	1.14011	1.30669
107873285	-1.06537	-0.865179	-1.08512	-0.687111	-0.603234	-0.770211	-0.936581	-0.395574	-0.649382	-0.428675	0.0399305	0.0061948	-0.4364	-0.311715	-0.4364	-0.0281435	1.76114	-0.117029	0.456327	0.30638	0.116329	1.63211	1.9483	2.54941
107867749	1.06452	0.98053	1.0788	0.400195	0.839104	0.821694	1.51396	-0.233173	1.01351	1.06045	-1.6274	-0.561466	0.373091	0.441576	0.176477	-0.636349	-1.24751	-0.244989	-0.381872	0.144855	-0.0424578	-1.46959	-1.61847	-1.84551
107875637	-0.695366	-0.89815	-0.627932	-0.183113	-0.476988	0.0675484	-0.666778	-1.16775	-0.792465	1.10808	-0.507976	0.17545	-0.725635	-0.723546	-0.700783	-0.054056	1.49371	0.817315	-0.692316	0.231718	-0.801295	1.69658	1.84094	2.2828
107873392	-0.713541	-0.655304	-0.744672	-0.624564	-0.603135	-0.67052	-0.521986	-0.604218	-0.533181	-0.499923	1.19869	0.450741	-0.663857	-0.653219	-0.230254	1.00737	1.57777	-0.160051	-0.573567	-0.689222	-0.799114	1.1964	2.24112	2.26824
107870880	-1.28019	-1.36453	-1.27936	-0.0815922	0.0178109	-0.332361	-0.923097	-0.423113	-1.10889	-0.527737	1.04098	0.72786	-0.616074	-0.69707	-0.664228	1.61246	-0.220242	1.1224	0.890048	-0.0742396	-0.405669	1.6904	1.87421	1.02222
107855970	-0.777805	-0.60017	-0.703987	-0.233123	-0.154324	-0.466569	-0.552615	-0.6584	-0.742787	-0.688244	2.10832	-0.0496748	-0.79136	-0.640399	-0.181154	0.253721	0.101503	0.0873362	-0.334168	-0.762002	-0.350329	1.47786	2.45326	2.20511
107877859	-0.980012	-1.14953	-1.25602	0.256611	0.0346658	0.0564723	-1.17691	-0.916188	-1.24889	-0.296432	0.98384	0.782951	-0.603807	-0.739909	-0.860709	1.12462	1.13228	0.97395	-0.153545	-0.282374	-0.52339	1.24716	1.60557	1.98959
107864275	0.575144	1.15188	0.301673	0.211811	0.198008	-0.172383	-0.216384	0.727889	0.436359	-0.471242	1.15256	0.0666082	0.25462	1.11586	-1.06629	-0.240928	0.403018	0.451987	-0.0165145	-0.562784	1.79496	-1.94861	-2.1372	-2.01005
107862902	-0.608206	-0.399241	-0.701376	0.80565	1.73049	0.921439	-1.32243	-0.306805	-0.585069	1.21594	-1.08215	-1.27447	-0.838323	-1.03072	-0.264624	0.448076	-0.163375	-0.397611	-0.821296	-0.33833	0.158113	1.35175	1.87581	1.62674
107843425	-0.669087	-0.533099	-0.546068	0.214085	0.337918	0.124751	-0.861598	-0.736125	-0.763529	0.0857466	-0.0973252	-0.370495	-0.880751	-0.84731	-0.849934	0.003909	-0.252615	0.0653975	-0.092056	0.479375	-0.805518	2.17326	2.05182	2.76925
107862795	-0.169248	2.02901	0.454558	0.111041	0.198828	0.423082	-0.94367	-0.0129627	-0.0389898	0.811428	1.11891	0.0897656	-0.800837	-1.21527	-0.187444	-1.82364	-1.32825	-1.56321	-0.263363	0.318636	0.220924	0.066174	0.121088	2.38343
107866094	-0.471199	-0.48042	-0.481545	-0.480321	-0.480867	-0.481185	-0.475104	-0.472062	-0.461651	-0.452208	-0.423144	-0.403609	-0.47123	-0.470949	-0.221192	-0.253395	0.678231	-0.299284	-0.338048	-0.149642	-0.363061	2.40046	2.0168	3.03463
107840158	-1.04947	-1.38122	-0.982046	1.09029	1.05054	0.649717	-0.779211	-0.180554	-0.493484	1.8202	-1.46935	-1.08118	0.688126	0.0173926	-0.560631	-0.55893	-0.832404	-0.0771717	-0.564633	0.704193	-0.0358127	1.04506	2.05516	0.925393
107859346	0.377472	0.653096	0.813313	-0.511154	-0.713018	-0.968272	0.808055	0.662639	0.659225	-0.871138	2.7204	0.399903	0.581916	0.578336	-0.565642	-0.988796	0.317675	-0.977778	1.17493	-0.044626	-0.0123038	-1.70333	-1.34784	-1.04305
107867009	-0.820941	-0.927536	-1.08778	-0.717337	-0.00465316	-0.723343	-0.958093	-1.01134	-0.94144	-0.761394	1.54231	-0.0764676	-0.65463	-0.515396	-0.656267	1.59888	1.02652	1.69227	0.417869	0.0852253	-0.503972	1.3165	1.12656	1.55446
107852644	-0.493511	-0.128758	-0.219871	0.980731	1.3237	0.577953	-0.817879	0.378237	-1.10931	0.782339	-1.14648	-1.61842	-0.0504193	-0.316105	-0.225876	-0.31295	-1.73686	1.02579	-0.600319	0.113382	-0.830396	0.642913	2.12188	1.66023
107862232	0.0737062	-0.061427	0.28764	-0.0700455	0.636048	-0.0331625	-0.60998	-0.217069	-0.38929	0.533536	-0.295098	-0.107144	-1.33108	-1.52407	-0.910665	0.276925	-0.357428	-0.438608	-0.655158	-0.372131	-0.928106	2.85215	1.69277	1.9477
107845555	-0.891323	-0.869877	-1.00625	0.336966	-0.051103	-0.0527475	-0.702467	-0.78269	-0.581296	0.140558	-0.480838	0.561323	-1.2339	-0.908996	0.138638	0.718197	0.286063	-0.110967	-0.00378795	-0.967497	-0.0510865	2.07163	1.87731	2.56413
107838893	-0.766882	-0.650001	-1.01744	1.37006	1.95055	0.63779	-0.416211	-0.097266	-0.992396	0.949059	-1.07821	-0.666745	-0.296264	-0.530345	-0.0392998	0.471049	0.0562849	-0.933099	-0.880799	-0.100897	-1.03214	0.712653	0.739368	2.61117
107864272	1.38023	0.909223	1.48447	-0.997085	-0.872099	-1.25301	0.33434	-0.0743817	0.23746	-0.56029	-1.40077	-1.06004	0.500439	-0.170583	0.0264388	-0.867156	0.0643386	0.171034	-1.37538	-0.380326	-0.779252	1.27999	1.57723	1.82516
107839168	-0.895737	-0.701885	-0.894389	-0.16733	0.369006	-0.453213	-0.961444	-0.331946	-0.692016	-0.101083	-0.585897	-0.852806	-0.412709	-0.553318	0.0316321	0.257205	0.786616	1.07259	-0.739415	-0.0650494	-0.656542	1.85642	2.65864	2.03267
107875527	-0.836635	-0.91207	-0.873876	-0.836413	-0.811844	-0.831591	-0.56905	-0.793754	-0.430514	1.03279	-0.429734	1.34982	-0.782969	-0.76323	0.980552	0.564426	0.415576	0.151393	-0.275029	-0.418804	-0.627186	1.52359	2.30096	1.87361
107877830	-1.11963	-1.10083	-1.40263	1.04552	1.40062	1.16997	-1.30964	-0.477829	-0.701612	0.881635	-1.29493	-0.281122	-0.535004	-0.711781	-0.440865	1.14971	0.523823	-0.138244	0.0249404	-0.498781	-0.207969	0.848463	2.0958	1.08037
107868631	-0.578221	-0.588339	-0.766166	1.50081	0.977248	1.33066	-0.421119	-0.75157	-0.794182	-0.606828	-0.657747	0.159653	-0.877647	-0.810088	-0.526591	1.55168	0.57055	-0.631206	-0.898605	-0.878288	-0.877244	1.31384	1.22154	2.03786
107842835	0.603204	0.121071	0.227945	-0.648496	-0.825992	0.479493	0.203216	-1.52743	0.502927	0.754726	-0.0518259	0.192273	-0.822106	-0.769344	0.551673	-1.37899	-0.12839	-2.31269	-0.00195608	-0.0561294	1.35606	0.605726	0.306078	2.61895
107839487	-0.129652	0.38387	-0.600143	0.421912	0.412819	0.271767	-0.121143	-0.298216	-0.468609	0.0149504	1.55496	-0.841376	0.518617	0.873876	-0.875569	-0.997705	1.56878	2.49851	0.00653132	-0.231183	0.420703	-1.21283	-1.15113	-2.01974
107862715	-0.558299	0.222848	-0.832077	1.22943	1.52306	0.457941	-0.142842	1.18852	0.725451	-0.238361	-0.251738	-1.59887	0.377397	0.840612	0.127127	-0.848903	-1.75721	0.658849	1.37308	0.951769	0.447012	-1.29224	-1.54028	-1.06227
107870084	1.12918	-0.262223	0.901334	0.505874	-0.256677	0.62205	1.22495	-0.771237	0.729666	2.0691	-1.5539	-0.2688	0.378832	0.203599	0.596763	0.140259	-1.02708	-1.36553	0.594601	0.805182	-0.173379	-1.70684	-0.984632	-1.53109
107840464	0.869942	0.783092	0.726755	-1.3492	-1.45172	-1.31601	0.968604	-0.179526	-0.661932	-0.65134	1.62709	0.799368	-1.00044	-0.646187	1.2205	-0.466987	0.57187	0.173405	-0.599046	-0.744834	-1.41979	0.566103	0.311403	1.86888
107861943	-0.837413	-0.440072	-0.944834	-0.61688	-0.52496	-0.393699	-0.877248	-0.585236	-0.827224	-0.581608	0.0971265	0.577374	-0.444048	-0.497284	-0.499264	0.5752	0.131804	-0.211517	1.01347	-0.588212	-0.273734	2.06234	2.62304	2.06288
107861280	-0.813155	-0.794001	-0.812686	0.0125835	-0.36687	0.300933	-0.780287	-0.822676	-0.788859	0.2667	-0.368465	0.951945	-0.718462	-0.586475	-0.742737	1.16366	0.965067	-0.144434	-0.626254	-0.656362	-0.775283	2.27321	2.05564	1.80727
107847461	0.548446	1.01891	0.443008	-1.01855	-0.314463	-0.921915	0.331931	1.24594	0.549892	-1.259	2.49829	-0.506592	-0.420421	-0.266361	0.935125	0.426446	0.489574	0.174278	0.602291	-0.761565	0.511499	-0.998837	-1.35139	-1.95654
107874920	0.681093	1.04478	0.657146	-0.575194	-0.717791	-0.655784	-0.0278275	0.159506	0.117429	0.507732	-1.35942	-0.79696	-1.17905	-1.21437	-0.0112805	-0.258963	-0.968893	-0.555804	-0.492686	-0.642552	0.348213	1.58931	2.12106	2.2303
107839842	1.06941	1.28249	1.12445	0.720758	0.623841	0.825793	0.00577377	-0.0936085	-0.222403	-0.580202	-0.306854	-0.820832	0.4875	-0.0133859	-0.258887	-1.34886	-1.34494	0.419208	1.89093	1.0424	0.184905	-1.40573	-1.75803	-1.52373
107862481	-1.01532	-1.02134	-1.01636	-0.460355	-0.359218	-0.564757	-0.820182	-0.642171	-0.797006	-0.229874	0.0533851	-0.183036	-0.0138929	-0.305685	-0.869089	1.07923	0.99982	1.8674	-0.671741	0.0785787	-0.572854	1.4727	1.96839	2.02339
107842775	-0.694743	-0.650718	-0.736664	-0.57998	-0.622292	-0.645829	-0.62922	-0.619496	-0.423348	-0.526143	0.0186357	-0.168204	-0.602379	-0.394219	0.696833	-0.224032	0.888144	-0.38322	0.0567647	-0.108653	-0.338517	1.29905	3.3355	2.05273
107859432	-1.01372	-0.986046	-1.02851	-0.901888	-0.82744	-0.919659	-0.820847	-0.746405	-0.762305	0.00372736	0.429262	-0.168968	-0.272291	-0.15309	-0.546566	0.78556	0.787079	1.00154	0.353358	0.209468	-0.528787	1.84806	2.0717	2.18677
107877910	-1.36315	-1.21587	-1.25675	-0.27655	0.57284	-0.24504	-0.861721	-0.0580086	-0.911054	0.0772222	0.909084	-1.23317	0.513912	0.314556	-1.30161	0.511915	0.582741	2.2641	0.289089	-0.125236	-0.708155	0.473684	1.99132	1.05584
107872499	-1.05052	-1.17061	-1.03227	-0.152038	-0.402668	-0.134287	-0.740499	-1.06469	-0.995279	0.755565	0.321595	0.484318	-0.316453	-0.449289	-0.950327	0.737626	1.36241	0.546108	-0.519598	0.0319433	-0.855645	1.44748	1.88038	2.26674
107843606	0.531478	0.774315	0.560205	-0.530283	-0.469978	-0.621139	0.561231	0.601308	0.0984411	-0.0984036	-1.68606	-0.850411	-0.233487	-0.264612	0.834228	-0.611034	-1.54676	-0.866023	-1.07308	0.0822292	-0.233138	1.32764	0.750251	2.96309
107858653	-0.390082	-0.415039	-0.402212	-0.392216	-0.379082	-0.387856	-0.395552	-0.416653	-0.391741	-0.357264	-0.395304	-0.316644	-0.399208	-0.382822	0.0101894	-0.339162	-0.332537	-0.381915	-0.26022	-0.294547	-0.407451	1.66649	2.23644	3.52439
107863047	-0.647582	-0.646154	-0.792232	-0.286707	0.0104959	-0.730937	-0.600512	-0.213364	-0.476251	-0.602254	-0.363123	-0.380373	-0.74036	-0.709688	-0.4059	-0.183804	0.999605	0.709134	-0.220915	0.265789	-0.815493	1.76238	2.81723	2.25101
107843071	-0.906143	-0.83805	-0.884302	-0.20947	0.0129247	-0.273134	-0.956007	-0.859024	-0.914763	-0.118212	2.14214	0.206513	-0.899934	-0.69092	-0.777508	1.35438	1.37294	0.468531	-0.311941	-0.718619	-0.600153	1.20347	1.79579	1.40148
107872112	-0.143	0.0562858	-0.225587	-0.680177	-0.0996271	-0.934551	-0.326417	0.335213	-0.548237	0.0446404	-0.720361	-0.534075	-0.715545	-0.596952	-0.801483	0.633572	1.39222	-0.429987	-1.21441	-0.763381	-0.220365	2.13626	2.35363	2.00233
107862203	-0.853778	-0.885835	-0.899099	0.79298	0.427801	1.9156	-0.537262	-0.925547	-0.895989	1.08957	-0.812782	1.32725	-0.718464	-0.74809	-0.896077	0.517859	0.316029	-0.818951	-0.821515	-0.251084	-0.661436	1.67085	1.02136	1.6466
107867887	0.826303	0.617649	0.901275	0.164887	0.156775	0.221377	0.826265	1.19758	0.718726	-0.766363	-0.611918	1.67629	0.119542	0.759277	-0.522562	0.576908	-1.33059	-2.70623	0.0669313	-0.746853	0.809501	-1.00509	-1.2897	-0.659979
107864504	0.312162	0.848417	0.699355	-0.692851	-0.23995	-1.26333	1.04585	0.375172	-0.0333806	-1.51047	2.00749	-0.864212	1.63214	1.09694	0.0510266	-0.154148	-0.365287	0.944677	-0.635979	1.07869	-0.952622	-1.06462	-1.32771	-0.987358
107864188	-0.87349	-1.04581	-0.886018	0.439668	0.320446	0.0711153	-1.14444	-1.20843	-1.05578	0.572527	0.252259	-0.0927959	-0.884323	-0.948221	-0.742346	0.238294	1.06856	0.926623	-0.0230116	-0.290554	-0.456155	1.65895	1.94962	2.15333
107845234	0.16686	0.695708	0.738214	0.147995	0.184503	-0.0438024	0.99699	1.36475	0.656378	-0.627716	0.0199978	-0.85155	1.55221	1.32858	0.113437	-0.817675	-1.41149	-0.887	0.948233	0.56078	0.233876	-1.7144	-1.61306	-1.74181
107839344	-0.0837699	0.415275	0.644394	-0.596704	-0.702795	-0.0881532	1.74184	1.03912	0.620805	1.03606	0.42921	0.0850425	0.0908158	1.03578	-1.00694	-1.29726	-0.942497	2.03627	0.610161	-0.0476939	-0.796517	-1.32443	-1.51435	-1.38366
107840265	-0.972012	-1.02681	-1.01504	-0.727371	-0.68659	-0.685431	-0.798523	-0.892128	-0.644388	0.322851	0.980063	0.294533	-0.385773	-0.242841	0.897341	-0.316537	1.75449	-0.147413	-0.066599	-0.496063	-0.684243	1.37529	2.15443	2.00876
107862779	-0.510717	-0.444479	-0.487645	-0.453249	-0.31661	-0.483521	-0.430816	-0.490586	-0.457298	-0.51573	-0.406493	0.334865	-0.548361	-0.544315	0.0532056	1.3702	-0.385963	-0.259956	-0.546801	-0.545793	-0.536819	1.4232	1.71266	3.47103
107848078	-0.241813	-0.529337	-1.40068	0.6403	0.462819	0.173906	-1.38581	0.521178	-0.487691	-0.0422648	-1.7175	1.15098	-0.953927	-0.985644	0.323132	0.579442	1.00346	-0.806775	-0.931199	-0.469886	0.507182	0.753509	1.71031	2.1263
107849043	1.06966	1.08629	0.601366	0.264164	-0.471453	-0.634394	-0.533802	0.655101	0.766851	-1.13728	1.95876	-0.0768691	0.80337	0.615168	-0.681781	-0.925516	-0.276213	0.290419	1.27676	0.156134	0.340198	-1.57976	-1.62975	-1.93742
107850997	-0.705334	-0.561842	-0.669833	-0.680494	-0.522974	-0.71009	-0.527953	-0.171409	-0.293694	-0.765375	-0.23256	-0.595272	-0.26161	-0.180643	-0.259132	0.298334	-0.0177873	-0.503717	0.147205	0.0179769	-0.220124	2.64291	2.11347	2.65995
107847491	-0.418095	0.156539	-0.558653	0.452434	1.59613	0.741386	-1.08766	-0.757006	-0.835406	0.390732	-0.0344113	-0.461021	-0.974012	-1.18056	-0.225884	-0.843002	-0.291801	-0.606559	0.102522	-0.410599	-0.674799	1.40351	2.20036	2.31586
107840471	-0.104416	-0.739245	-0.668058	0.0775398	0.315938	0.691364	-0.176075	-0.522886	-0.428481	1.65439	-1.21352	0.426181	-0.627099	-1.10589	-0.590829	0.637112	0.44317	0.0754478	-1.98621	-0.49618	-0.715144	1.54583	2.35267	1.15438
107878399	-1.00434	-0.861347	-1.33758	0.179134	0.538769	0.210583	-0.512206	0.149534	-0.824569	-1.00341	-0.770246	-0.550483	-0.579482	-0.319391	-0.495477	1.91734	-1.0299	1.00863	0.240604	0.195921	-0.2751	2.36487	1.71074	1.0474
107847449	-0.766264	-0.510661	-0.78616	0.457836	1.06525	0.447452	-0.353295	-0.233983	-0.453205	-0.548367	-0.537535	-0.607358	-1.04171	-0.761788	0.394775	-0.212922	-0.00736161	-1.01315	-0.445122	-0.902008	0.325364	1.80086	1.89914	2.79022
107842923	-0.703614	-0.60739	-0.83027	-0.122571	0.0758627	-0.284329	-0.680458	-0.586002	-0.456981	-0.565725	0.649204	-0.48173	-0.69576	-0.720242	-0.474291	0.163943	-0.166298	-0.123704	0.244284	-0.127765	-0.545248	1.51026	3.00982	2.51901
107844002	-0.264737	-0.376545	-0.359553	-0.491642	-0.494913	-0.491667	-0.170036	-0.30075	-0.332676	-0.497796	-0.491786	-0.443613	-0.444583	-0.416575	0.595521	-0.168301	-0.45969	-0.435914	-0.457354	-0.401795	-0.469672	2.05607	1.98846	3.32955
107867137	-1.10151	-1.05042	-1.00538	0.935484	1.27965	0.742662	-0.876272	-0.51988	-0.811191	-0.383321	-0.374981	-0.337366	-0.0117484	-0.375631	-1.04853	0.623842	0.0351548	0.607406	-0.86184	-0.287133	-0.872656	1.86206	1.67472	2.15687
107859231	-0.0826104	-0.114058	-0.440837	-1.08318	-0.842	-0.918352	-0.253784	-0.584758	-0.221988	-0.516103	-0.381653	0.429525	-1.4436	-1.1553	0.701916	0.213913	1.84928	-0.671621	0.121174	-0.427517	0.0949424	1.74235	2.00956	1.9747
107854701	0.73284	1.01339	0.794081	-0.360846	-0.539845	-0.129199	1.08596	0.843277	0.856586	-0.746907	0.0561254	0.411802	1.07255	0.745603	0.51742	-0.17051	-1.83491	-0.708347	0.836845	0.561853	0.396952	-1.5849	-2.07413	-1.77569
107854675	0.564874	0.803657	0.666355	0.204103	0.167419	0.266762	0.820518	0.184936	0.367055	-0.752902	1.50282	0.377101	-0.0646578	0.643284	0.968536	-0.766425	-0.63552	-1.90814	1.19055	0.0668984	0.714675	-1.98339	-1.62599	-1.77251
107856180	-0.32647	-0.35091	-0.420081	0.0858512	-0.0822462	0.0612361	-0.819388	0.379863	-0.132609	-0.445746	2.03039	1.3761	0.549872	0.796174	-0.329915	1.48291	0.188755	-0.730057	0.706419	0.403149	1.01334	-2.09712	-1.50762	-1.83189
107870531	-0.584404	-1.01654	-0.707141	-0.970426	-0.995559	-0.771311	-0.0589735	-0.761558	-0.522633	0.212508	-0.579332	0.223833	-0.547833	-0.630098	0.264285	0.0981438	1.80153	-0.385602	-0.265143	0.31184	-0.284663	1.83526	1.91075	2.42306
107855307	-0.95388	-0.864232	-0.95875	0.154847	0.635313	0.058154	-0.909198	-0.489695	-0.72109	0.256371	-0.64676	-0.290936	-0.32166	-0.447079	-0.666853	0.38557	0.173765	1.03986	-1.05371	-0.0884803	-0.757038	1.79397	2.26988	2.40163
107850654	-1.14879	-1.09095	-1.21973	-0.125642	-0.182755	0.0972884	-0.941348	-0.971633	-0.828225	1.08956	0.245282	0.406599	-0.656084	-0.542239	-0.526671	0.925778	0.596812	1.00868	-0.643989	-0.390504	-0.734565	1.64721	2.08908	1.89683
107871417	-0.604209	-0.614218	-0.628107	-0.411226	-0.450176	-0.387989	-0.638981	-0.583357	-0.522104	-0.366992	-0.447357	0.0756211	-0.339467	-0.334217	-0.613853	-0.0482521	0.817333	-0.430615	-0.332269	-0.0822136	-0.416877	2.44747	2.16075	2.75131
107863738	-0.887049	-0.96565	-0.940064	-0.841157	-0.729712	-0.613081	-0.258583	-0.229323	-0.225322	-0.459614	0.831483	0.415537	-0.540007	-0.802229	0.0418684	0.616382	0.526176	0.362203	-0.575157	-0.318901	-0.94104	2.05135	1.8939	2.58799
107840325	0.510425	0.706786	0.837436	-0.291607	0.423975	0.0383858	0.736069	-0.250098	0.85817	-0.328553	-1.93995	-1.51984	-0.848518	-1.0062	0.34768	-0.555176	-0.901833	-0.62435	-0.643986	-0.134295	-0.672741	2.17894	1.4636	1.61569
107842745	-1.00975	-1.05281	-1.0411	-0.308179	-0.353534	-0.0642861	-0.719961	-0.835955	-0.829124	0.48422	-0.856363	0.171725	-0.480238	-0.391001	-0.386113	0.0812572	0.941734	-0.349784	0.413442	0.686433	-0.509622	1.57366	2.2675	2.56785
107850365	-0.952839	-0.947908	-0.951544	-0.132905	0.162771	0.0564599	-0.910835	-0.855241	-0.883641	-0.503142	0.342703	-0.543324	-0.258983	-0.1615	-0.86585	0.130687	0.682853	0.532048	0.053078	-0.103516	-0.612801	2.04146	2.10992	2.57205
107863807	-1.30209	-1.25694	-1.30279	-0.71461	-0.907641	-0.918387	-0.940902	-0.757141	-0.641592	-0.867063	2.29548	0.709121	0.098155	0.432431	-0.0978303	0.585851	1.73203	0.941101	0.603739	0.0135866	-0.335069	0.733283	1.2695	0.62778
107862364	0.794236	0.710313	0.312245	-0.488287	0.367073	-0.250457	1.24388	0.748928	1.11941	-0.580661	-0.146202	-1.36146	0.907497	1.04361	0.353365	-0.860898	-1.02044	0.108192	0.578716	1.06724	0.674552	-2.0075	-1.16775	-2.1456
107847900	-0.815924	-0.751318	-0.816101	-0.592449	-0.305916	-0.513054	-0.750426	-0.240239	-0.445137	-0.560424	-0.604747	-0.431105	-0.485415	-0.462623	-0.411346	0.0278561	1.06422	-0.65482	0.507574	0.108577	0.258628	2.19363	1.87757	2.80299
107875571	-1.2566	-1.20068	-1.35017	-0.151634	-0.355096	-0.375839	-0.834513	-0.733287	-0.586646	0.279412	-0.295357	0.741172	-1.13151	-0.906253	0.649869	0.491643	0.459284	0.374389	0.310167	-0.219656	0.066465	1.67757	2.0255	2.32177
107852922	-0.503183	-0.46014	-0.892443	-0.9176	-0.486508	-1.217	-0.362921	0.126936	-0.0781305	-0.377751	-0.425608	-0.0709533	-0.723227	-0.591836	0.455104	-0.515759	0.674531	-0.147395	0.174704	0.255703	-0.753017	2.1791	1.77382	2.88358
107875881	-0.579216	-0.372527	-0.71401	-0.627644	-0.591342	-0.583468	-0.577748	-0.633547	-0.718934	-0.0560845	-0.745886	0.290406	-0.543988	-0.644707	0.250517	1.13257	-0.503805	-0.755327	0.103214	0.304034	-0.331077	2.34127	2.08386	2.47344
107855065	-0.975477	-0.819302	-0.866073	-1.31578	-0.999004	-1.06959	-0.820973	-0.70214	-0.770807	-0.758175	1.75206	-0.16428	0.367438	0.367626	-0.606793	0.609046	0.731526	1.4076	0.298167	0.627301	-0.772102	1.37567	1.49408	1.60998
107864117	-0.668611	-0.609842	-0.646083	-0.680642	-0.649082	-0.702877	-0.535912	-0.321162	-0.322716	-0.685452	-0.485618	-0.618262	-0.401278	-0.346263	-0.233603	-0.115355	-0.108145	-0.339171	0.354117	0.551858	0.269258	2.20394	2.47974	2.61117
107850486	-0.495336	-0.278077	-0.575965	-0.734404	-0.799608	-0.814031	-0.470933	-0.470542	-0.477583	-0.551519	-0.666353	-0.608771	-0.299915	-0.177753	0.0855897	-0.497235	0.895253	0.638729	-0.00603417	0.129448	-0.228441	0.812072	2.17594	3.41546
107841035	-0.630266	-1.09672	-0.411903	-1.14746	-1.29193	-1.09288	0.947524	-1.34857	-0.404772	0.587859	-0.827257	1.29623	-0.488092	-0.392276	0.115766	0.913693	0.716107	0.476508	-0.0243355	0.759102	-1.22181	0.967409	1.77757	1.82051
107875517	-0.895551	-0.416024	-0.628799	0.0662839	0.71478	0.0192102	-1.46431	-0.977536	-1.14537	0.764986	-0.284362	-0.0623404	-0.267229	-0.348629	-1.38165	0.927677	-0.923237	1.3805	-0.157571	-0.214348	-0.184625	2.1214	1.86883	1.48791
107851751	-0.53486	-0.544417	-0.494633	-0.525291	-0.509935	-0.582254	-0.518902	-0.500144	-0.489142	-0.169162	-0.503404	-0.339992	-0.130346	-0.209254	-0.0738717	-0.337582	-0.29595	0.273046	-0.456866	0.170092	-0.598413	1.63928	3.0762	2.65579
107855664	-0.531797	-0.507441	-0.359584	0.43519	0.744216	-0.146059	-0.59404	-0.496495	-0.500026	-0.690026	0.0553714	-0.553399	-0.517444	-0.52485	-0.538937	-0.367485	-0.352494	-0.0612823	-0.471109	-0.634541	-0.681889	2.38297	2.39898	2.51217
107860451	-1.11014	-1.09573	-1.02883	0.232484	0.253223	0.0559292	-1.05709	-0.71764	-0.970278	0.74504	-0.0807836	0.296999	-0.64776	-0.640269	-0.700909	0.562652	1.08906	0.173244	-0.384836	-0.201234	-0.853804	1.83694	2.03988	2.20386
107839886	-0.742255	-0.664042	-0.884466	-0.686944	-0.765631	-0.632191	-0.639482	-0.219974	-0.204914	-0.564527	-1.23667	0.358212	-0.22609	-0.434536	0.259813	0.375086	0.984532	-0.710323	0.0617177	0.347552	-0.436176	1.95423	2.07226	2.63482
107847450	-0.726331	-0.907165	-0.867	0.567699	0.510289	0.889101	-1.02547	-0.946029	-0.91608	1.02434	-0.530399	0.685932	-1.09063	-0.917913	-0.477926	0.666767	0.438544	-0.729473	-0.188823	-0.43571	-0.607804	1.43549	1.72264	2.42596
107839922	0.535177	1.02296	1.09369	-0.965492	-1.0929	-0.951854	1.04641	0.849968	0.721978	-0.932651	2.70013	0.363429	0.400053	0.219388	0.687415	-0.89653	0.249207	-0.455954	-0.409556	-0.311385	-0.0886794	-1.24035	-1.22505	-1.3194
107851584	-0.834101	-0.78582	-0.804691	-0.746618	-0.776087	-0.696194	-0.734958	-0.637215	-0.65727	-0.0536143	-0.521992	-0.274704	-0.483447	-0.469526	-0.533233	0.739009	1.10672	0.5206	0.291449	0.14529	-0.407807	2.26476	2.28636	2.06309
107878564	0.475401	1.58304	0.841577	-0.826512	-0.563375	-1.15561	0.203308	1.00482	0.305502	-0.407722	1.44565	-1.1921	1.15955	0.634087	0.634723	-0.640998	-0.934907	0.92923	-0.0882623	0.148163	1.01887	-1.68558	-1.3383	-1.55056
107838845	-0.666621	-0.710921	-0.72437	-0.566468	-0.571576	-0.695439	-0.719167	-0.597967	-0.558937	-0.39135	-0.395038	-0.080979	-0.489254	-0.491914	-0.42583	0.261047	1.77462	0.0706297	-0.160501	-0.135716	-0.38803	2.14208	2.25396	2.26774
107847903	1.04442	1.16947	1.04913	0.947088	1.13158	1.01969	0.622939	0.880245	-0.155917	0.273442	-0.470939	-0.257438	0.720668	0.123508	0.0673838	-0.0213645	-2.02201	-0.892399	-0.94613	-0.656115	0.562225	-0.960182	-0.756966	-2.47233
107872780	-1.14116	-1.07377	-1.14375	-0.140304	0.0540649	-0.0906173	-1.10128	-0.819963	-1.11483	0.0410117	0.123839	-0.317131	-0.112102	-0.1996	-1.03668	0.563361	0.837409	0.0435952	0.249079	0.512281	-0.433271	1.91281	2.09705	2.28996
107858595	0.72079	-0.122859	0.814431	-0.55951	-0.617121	-0.91592	0.259468	0.752325	0.257273	-1.13536	2.59858	0.826242	0.609054	0.23925	-0.360467	-0.781676	-0.58947	0.748336	0.43745	-0.440464	1.48265	-1.17302	-1.24391	-1.80608
107858301	1.7318	-0.309441	0.265941	-1.11389	-1.09175	-0.671548	0.687866	0.779168	-1.04962	0.263437	1.0813	0.736185	1.00557	1.12073	-0.284944	0.452608	0.117655	-0.781506	0.5274	0.777298	-0.534515	0.38473	-1.81066	-2.28381
107843596	-0.560117	-0.392976	-0.453087	0.522196	1.19037	0.578424	-1.16788	-0.689035	-0.824399	0.99839	-0.600372	-0.82051	-0.427637	-0.575813	-0.872032	0.565188	0.0736124	0.131293	-0.967078	-0.580282	-1.00724	1.58093	2.38785	1.9102
107871048	0.804133	0.518044	1.05823	0.384478	0.83127	0.151013	0.73433	0.761761	0.491343	0.0429382	-0.367761	-1.5492	1.84534	0.277814	-1.07121	-1.00012	-0.634953	0.802028	-1.56592	1.57564	-0.477977	-1.26991	-1.09292	-1.24839
107875291	-0.621529	-0.627108	-0.659931	-0.561176	-0.535744	-0.608448	-0.43442	-0.507606	-0.461077	-0.611369	-0.186221	-0.473297	-0.308474	-0.305081	-0.214429	0.180624	0.204868	0.578909	-0.245044	-0.199566	-0.621944	1.72845	3.15423	2.33538
107864120	-0.796184	-0.820509	-0.93272	-0.0930167	-0.0725096	-0.197189	-0.877572	-0.792537	-0.858549	-0.241175	-0.357475	-0.197701	-0.704649	-0.677692	-0.508169	0.628785	1.42979	0.15705	0.0702307	-0.243744	-0.453425	1.96014	2.02822	2.5506
107861685	-1.16371	-0.91907	-1.18811	1.11563	1.03584	0.614036	-1.16372	-0.794489	-1.20018	0.819382	0.0966165	-0.110922	-0.631905	-0.628956	-0.877196	0.670387	0.357504	0.117058	-0.352692	-0.510236	-0.537177	1.3384	1.57056	2.34294
107850437	-0.359788	-0.815835	-0.55981	-0.976096	-0.87629	-0.942287	-0.963557	-0.624492	-0.95077	-0.540215	-0.12347	-0.945326	0.282817	0.258092	-1.08993	2.0673	1.34278	1.92701	0.393481	0.221174	-0.147874	1.29874	1.59437	0.52997
107867080	-0.410319	-0.413697	-0.414004	-0.409359	-0.404662	-0.409388	-0.409646	-0.401219	-0.404677	-0.411847	-0.305362	-0.391753	-0.370866	-0.346929	-0.240588	-0.334115	-0.220334	-0.362952	-0.300288	-0.263161	-0.355512	1.70236	3.01805	2.86027
107839106	-0.506828	-0.258149	-0.506086	0.783335	1.46106	0.550459	-0.937694	-0.194463	-0.651543	0.588913	-0.966535	-1.42038	-0.511811	-0.70086	-0.555795	-0.231141	-0.436764	0.0297075	-1.09897	-0.0980398	-0.274645	1.47749	2.28361	2.17514
107847498	1.79526	1.12589	0.848134	-0.416203	0.0475359	-0.0669871	0.320145	0.872948	0.245172	-1.37468	0.590581	-0.915128	0.997779	0.949023	-0.260793	0.115652	-1.05156	0.190154	-0.150624	-0.256617	1.40653	-1.57571	-1.5851	-1.8514
107856002	-1.76846	-1.35497	-1.46294	1.29305	1.7458	0.556734	-1.28157	-0.140207	-1.05567	0.421105	-0.610974	0.0155654	0.0836191	0.579734	-1.05042	0.433956	-0.188822	-0.234764	0.0248644	0.0274189	-0.124873	1.00134	1.44906	1.64144
107842205	-1.09762	-1.31078	-1.22071	-0.357512	-0.328197	-0.460225	-1.18271	-1.02922	-1.10537	-0.0390507	2.00881	0.931293	-0.0189999	-0.38073	-0.803242	0.938128	0.806076	1.10213	0.168933	0.16746	-0.778844	1.149	1.4339	1.40748
107839490	-0.965985	-0.884397	-1.21651	-0.00270684	-0.129017	-0.040449	-1.20388	-0.43819	-0.804793	-0.380401	-0.413139	-0.383802	-0.457518	-0.368813	-0.575225	0.637492	-0.27723	1.59385	0.109883	0.251991	-0.30601	2.05422	1.85201	2.34861
107839479	0.254077	0.195869	-0.417719	-1.04038	-0.985247	-1.13201	-0.395212	-0.806198	-0.448884	-0.14128	0.150586	1.94368	-0.742034	-0.758825	0.720543	-0.155535	0.849294	-0.0576628	-0.665061	-0.763402	-0.91953	1.02838	1.98524	2.30132
107838879	-0.710888	-0.0719078	-0.610896	-0.0863059	0.617944	-0.247618	-1.20715	-0.204184	-0.825097	-0.844005	0.276951	-1.42298	-0.33926	-0.558547	-0.372375	-0.255686	0.40004	-0.511209	-0.134006	0.0453961	0.232964	2.29484	2.28308	2.2509
107878854	-0.740598	-0.689809	-0.945015	1.16586	2.47607	0.413467	-0.728837	-0.0376752	-0.859176	-0.104207	-1.94536	-0.819548	-0.341187	-0.60888	0.161253	0.794577	-0.440492	0.0777748	-0.465143	-0.387043	-0.165316	1.25541	1.28547	1.64839
107877973	-0.996668	-1.15416	-1.28932	0.140638	0.711557	-0.173065	-0.824655	-0.0314344	-0.641728	-0.25377	-1.04835	-0.86062	-0.0988224	-0.048565	0.0200852	0.521988	-0.391262	-0.34701	-0.0848956	0.563457	-0.129352	1.44942	2.233	2.73353
107877525	-0.57341	-0.477513	-0.930661	1.08681	1.03425	1.09674	-1.00413	-1.05814	-1.10811	0.0485802	-0.312731	-0.75138	-1.17878	-1.1659	-0.123717	0.569354	0.161455	-0.424896	-0.101555	-0.0695991	-0.213728	1.23768	1.86128	2.3981
107845637	-0.712748	-0.766843	-0.710692	-0.0337201	0.0278795	-0.080382	-0.666227	-0.774775	-0.674945	0.0230095	1.09118	0.236418	-0.737388	-0.734723	-0.647782	-0.0643783	0.998496	-0.078398	-0.678659	-0.718671	-0.766323	1.61157	2.13648	2.72162
107877804	-0.966383	-0.93263	-0.974361	0.326128	0.996309	0.343511	-1.14177	-0.535604	-0.832634	0.305447	-1.18673	-0.962043	-0.0853056	-0.254352	-0.520001	0.00172987	-0.0780268	0.68294	-0.701884	0.2521	0.0632651	1.77352	2.22716	2.19962
107878270	-0.823638	0.133554	-0.0608954	0.44187	0.982286	0.900118	-0.0727208	0.434066	1.13459	-1.95157	2.43191	-0.23616	0.513444	0.641173	-1.07289	-0.00984685	-0.701877	0.206527	0.0015508	0.898836	0.175714	-0.785355	-1.90256	-1.27814
107856822	-0.409464	0.0675396	-0.419053	0.477089	0.160713	0.447091	-0.786014	-0.537148	-0.412207	-0.123802	0.604102	0.115968	-1.3201	-1.14145	-0.759793	-0.133108	0.477773	-0.563624	-0.6362	-0.594371	-1.06223	1.71739	2.55297	2.27793
107874722	-0.611367	-0.639402	-0.597079	-0.57695	-0.555942	-0.58251	-0.630433	-0.639758	-0.608018	-0.272436	0.398231	-0.0603519	-0.598458	-0.58762	0.989355	-0.265765	2.16983	-0.394815	-0.574798	-0.561472	-0.593152	1.35534	1.92778	2.50979
107840096	-0.317856	-0.360048	-0.426984	-0.442499	-0.440329	-0.442202	-0.319864	-0.380088	-0.360554	-0.442124	-0.408271	-0.389637	-0.420418	-0.414127	0.39032	-0.307851	-0.379939	-0.427129	-0.402438	-0.366181	-0.427977	1.66964	2.85445	2.9621
107867662	0.510177	-0.0630554	-0.109284	-0.0326702	0.210057	-1.03711	-0.450024	0.584725	0.518647	-0.667197	-1.13181	-1.97526	0.114741	-0.981404	0.161254	-0.985837	0.0970537	0.913694	-0.509768	-0.395422	-0.417648	1.13525	1.87479	2.6361
107858300	-0.582975	0.307662	-0.64629	0.000757382	-0.372119	-0.601234	0.766097	-0.497358	-0.0886642	2.90998	-0.92	-0.979759	0.616997	0.707978	1.007	-0.683259	0.0737032	2.02699	0.29177	-0.665544	0.324573	-0.766784	-1.5317	-0.697829
107862603	-0.582843	-0.682117	-0.70486	-0.546282	-0.547915	-0.551068	-0.714322	-0.512238	-0.549192	-0.176028	-0.352246	-0.116924	-0.407626	-0.382092	-0.307221	-0.132814	0.846541	-0.41008	0.0017229	-0.122173	-0.388513	2.29977	2.30046	2.73806
107875565	-0.652047	-0.647313	-0.643559	-0.616057	-0.625399	-0.629311	-0.551445	-0.426305	-0.505258	0.153418	0.0733955	-0.375652	-0.472821	-0.533921	-0.384997	0.535289	0.605065	0.532682	-0.559511	-0.563072	-0.450829	1.36065	3.37034	2.00666
107858033	-0.690143	-0.491617	-0.718229	1.38264	2.3246	1.28452	-0.985384	-0.478581	-0.898	0.474746	-1.13683	-0.993191	-0.761246	-0.691119	-0.576067	0.0799971	-0.477741	-0.627817	-0.15124	-0.0191317	-0.0929884	1.7304	1.0441	1.46834
107877347	-0.809518	-0.802022	-0.817933	-0.350444	-0.134137	-0.192607	-0.808831	-0.73572	-0.770664	-0.385109	0.833186	-0.251229	-0.624118	-0.654285	-0.724823	0.263825	2.02338	-0.456423	0.0742814	-0.133783	-0.566092	2.07992	1.95788	1.98526
107839763	-0.464723	-0.533112	-0.484261	-0.546775	-0.492277	-0.556492	-0.409381	-0.490254	-0.404564	-0.430574	-0.155108	-0.520193	-0.518968	-0.5938	-0.312126	0.00968438	0.324999	0.208683	-0.49418	-0.257651	-0.380615	2.47601	2.13918	2.8865
107856816	-1.3536	-0.903069	-1.47004	-0.216974	0.187692	-0.456334	-1.28592	-0.650038	-0.986873	0.62479	0.890064	-0.154174	-0.784222	-0.713598	-0.7573	1.11123	1.28122	0.19816	0.487361	0.199551	-0.22758	1.84025	2.00975	1.12966
107847408	-1.37272	-0.70896	-1.23903	1.21701	2.02552	1.14952	-1.2708	-0.329842	-0.957792	-0.939875	-0.279251	-1.31069	-0.128346	0.0783896	-0.919435	0.385014	0.87134	-0.765741	0.1791	0.554137	0.33872	0.854451	1.33868	1.2306
107871488	-0.829293	-0.507248	-0.879467	1.00395	1.3057	0.875734	-1.09823	-0.0574007	-0.641331	-0.225414	-0.0932803	-1.06993	-0.732122	-0.800941	-0.982966	0.573183	0.551041	-0.336411	-0.851306	-0.691253	-0.153746	1.643	2.29144	1.70629
107862401	-0.658899	-0.664552	-0.654568	-0.262437	-0.200907	-0.186753	-0.654148	-0.649524	-0.640171	-0.0860514	-0.0717888	-0.0839165	-0.62962	-0.608029	-0.594676	0.260545	0.77145	0.0852687	-0.539984	-0.573239	-0.597505	2.26244	2.46657	2.5105
107870473	0.221849	0.283422	0.280216	-1.06766	-0.592993	-1.49622	-0.231622	0.665909	0.115296	-1.16366	0.00702489	-1.46816	-0.311364	-0.44256	-0.178396	-0.365278	0.0654961	0.401655	-0.464819	-0.264886	-0.183182	1.36825	2.95942	1.86225
107843168	-0.419808	-0.410715	-0.447066	-0.419969	-0.39809	-0.42204	-0.415709	-0.341241	-0.29846	-0.459807	-0.336095	-0.437375	-0.427969	-0.452157	-0.347333	-0.302418	0.0207703	-0.143208	-0.390855	-0.406472	-0.447334	2.66142	2.28033	2.7616
107852036	0.515173	1.16891	1.04049	-1.11039	-1.06988	-1.50536	0.304296	0.839875	1.3887	-1.04655	2.35753	-0.741578	-0.0554239	0.153054	0.199426	0.729837	-0.530701	0.620083	-0.584141	-0.312177	0.809792	-1.06765	-1.03028	-1.07303
107860110	-0.927845	-0.798239	-0.867986	-0.358325	-0.323634	-0.364417	-0.684415	-0.470795	-0.545041	-0.331542	-0.125586	-0.204721	-0.450685	-0.364236	-0.0339249	0.20851	-0.171797	0.0266873	-0.134893	-0.0921591	-0.34585	1.83729	2.90353	2.62007
107871192	-1.16354	-0.607194	-1.59702	-0.143403	-0.20088	0.107895	-1.10576	-1.46159	-0.982757	-0.135369	1.94451	1.30057	-1.05551	-0.667971	-0.346677	0.326599	1.49768	1.37525	1.06082	0.211354	-0.43714	0.438947	0.729182	0.912026
107878458	-0.728082	-0.739747	-0.74599	-0.685538	-0.657338	-0.724739	-0.726788	-0.559392	-0.599724	-0.424528	0.0501282	-0.477936	-0.383425	-0.425664	0.200071	-0.423182	1.89185	-0.261646	0.148609	0.18216	-0.264974	1.55726	2.58388	2.21474
107867612	1.49381	1.02168	1.07292	-1.50459	-1.55848	-1.49615	0.621577	0.496358	0.834844	-0.45804	0.746969	0.303562	0.233503	0.516968	0.759204	-1.05581	-0.0844667	0.370795	0.26942	-0.117226	1.43573	-1.50731	-1.2566	-1.13867
107863345	-0.246659	-0.476037	-0.418747	0.732032	0.804877	1.04734	-0.629382	-0.378575	-0.309973	-0.0689769	-2.56376	-0.832177	-0.412041	-0.485767	-0.0294231	0.342379	0.368618	-0.308688	-1.01361	-0.672683	0.301776	1.23436	1.53814	2.47698
107847764	-0.680201	-0.669653	-0.700248	-0.615711	-0.607786	-0.661849	-0.663713	-0.540107	-0.635511	-0.483179	-0.452212	-0.203553	-0.480989	-0.507779	-0.434323	0.384213	1.05859	-0.396362	0.5136	0.0818579	-0.231224	2.50319	1.81011	2.61284
107867369	0.0569344	0.807671	1.16393	0.775508	1.29036	0.936017	1.09702	0.557869	0.25103	-0.0503471	-0.183829	-0.00570521	0.713587	0.461587	-0.437446	-0.834214	-0.85782	0.712222	0.313542	0.124574	-0.785172	-2.05386	-2.3557	-1.69776
107842912	1.12568	0.876497	0.938548	0.29102	-0.234517	-0.146867	0.510923	1.58677	1.07207	0.684317	-0.89506	-1.25181	0.12954	0.381291	1.12824	-1.0164	-0.856743	-0.548932	0.422682	-0.261837	1.01024	-1.2833	-1.70216	-1.96019
107858483	-0.159231	0.447925	-0.496898	0.29363	1.2136	-0.296114	0.278944	1.42026	0.885465	-1.54681	0.617717	-1.22157	0.422541	0.721943	1.19273	-0.86615	-0.922073	0.270674	0.674036	0.287926	1.44513	-1.72921	-1.56092	-1.37356
107864769	0.467539	0.0837692	-0.194453	-0.972823	-0.57904	-1.0767	-0.535524	-0.700378	0.306153	1.41218	-0.439309	1.52121	-1.44477	-1.3127	1.33699	0.741579	-0.126717	-0.653594	-0.842689	-1.25395	0.455389	0.632886	2.03547	1.13947
107852923	-0.641943	-0.613158	-0.575413	-0.826661	-0.828341	-0.843271	-0.478549	-0.573798	-0.507699	-0.56313	0.138513	-0.590918	-0.387118	-0.241756	-0.0756881	-0.297283	0.312779	3.01572	-0.00424176	0.0407334	-0.515341	1.78096	1.63219	1.64341
107851649	-0.633699	-0.41666	-1.04201	-0.349787	0.619101	-0.328156	-1.19986	0.179795	-0.277097	-1.07577	-0.420852	-1.59271	-0.479222	-0.400942	-0.241928	0.427111	0.0520815	0.807365	-0.198704	0.057335	0.0597535	2.30395	1.91685	2.23407
107878794	-0.89895	-1.04646	-1.06955	-0.0236435	0.150497	-0.0154635	-0.771867	-0.772476	-0.838443	0.0190677	-0.266099	0.116313	-0.623476	-0.597856	-0.69881	0.584539	0.368397	0.279799	0.0636381	0.0231642	-0.758372	1.9974	2.0961	2.68256
107854915	0.342433	0.80684	1.11905	-0.751378	-0.398863	-0.910772	0.603451	1.15359	0.705887	-1.11386	0.754958	-0.799496	1.41877	1.43353	0.468886	-0.893686	-0.956566	0.242553	0.9012	0.325643	0.333732	-1.73638	-1.40523	-1.64429
107870238	1.20864	0.726908	1.23342	0.192855	0.126551	0.532639	0.980604	-0.0252336	0.648011	1.63356	-1.07036	-0.752557	1.17146	0.666059	-0.376486	-0.400557	-1.58998	-0.436768	-0.209515	0.449228	0.150536	-1.89473	-1.87015	-1.09413
107879355	1.24152	0.776358	0.445983	0.32848	0.488665	0.978015	0.773102	1.59437	1.27194	1.2841	-1.44873	-1.42254	0.980166	0.035263	-0.449241	-0.47818	-1.14614	-0.704811	-1.14413	-0.314873	0.393312	-1.15384	-1.07438	-1.25442
107877731	-0.928407	-1.03885	-0.910499	0.210925	0.806528	-0.409157	-1.28886	0.11137	-0.231742	0.269571	-0.514826	-0.989068	-0.279801	-0.686815	-0.743298	0.587172	-0.81081	0.552567	-0.361842	0.134385	0.140914	1.97078	2.46793	1.94184
107866619	-0.695349	-0.698551	-0.642062	-0.550193	-0.584939	-0.629163	-0.707385	-0.633828	-0.678948	-0.657381	0.203706	-0.626427	-0.0983579	-0.204264	-0.266918	-0.380051	0.90486	0.976358	-0.07979	0.105781	-0.652501	1.75942	3.15115	1.68483
107862994	-0.92424	-0.990722	-0.907888	-0.36431	-0.188774	-0.490147	-0.834028	-0.502822	-0.710403	-0.453936	0.061104	-0.385256	-0.176433	-0.393189	-0.457236	0.190105	1.21374	0.546055	-0.632119	-0.00566092	-0.365829	2.12813	2.13125	2.5126
107862165	0.619229	1.01484	0.866677	1.26268	1.07311	0.80844	-0.154957	0.0209389	0.370578	1.56113	-1.96638	-1.92519	0.21085	0.214394	0.4963	-1.34289	-1.17243	-0.352687	-0.62834	0.425762	1.01987	-0.965273	-0.638572	-0.818079
107870684	-1.17071	-0.530823	-0.72476	0.113365	0.246441	-0.46466	-1.38322	-0.388466	-1.25316	-0.518005	1.19675	-0.168269	-0.660535	-0.36111	-0.802189	0.675407	0.792801	2.11629	0.319863	-0.664429	-0.832577	1.34325	1.06377	2.05497
107867130	-0.413135	-0.266552	-0.50379	0.131351	0.346998	0.000835755	-0.739628	-0.093779	-0.440854	-0.579424	-0.545118	-0.591906	-0.607603	-0.696966	-0.361685	-0.118674	-0.304547	0.560262	-0.728088	-0.675808	-0.306457	1.82243	1.61854	3.4936
107862076	-0.702165	-0.831477	-0.727197	-0.858134	-0.829431	-0.865346	-0.409335	-0.463745	-0.305439	-0.637779	-0.113999	-0.372474	-0.254454	-0.161129	0.397446	-0.252954	0.506569	-0.125835	0.180741	0.305712	-0.47269	2.53124	1.60515	2.85672
107867312	0.769704	0.151494	0.183324	0.892138	0.275179	1.17996	0.011558	0.829009	-0.270135	0.0581121	-1.69478	-1.04616	2.18722	1.66535	-0.947108	-0.104103	-0.808425	-0.679146	-0.747746	1.15607	0.307301	-1.1718	-1.09516	-1.10185
107862550	-0.915624	-0.893361	-1.03769	-0.200309	-0.0689603	-0.184605	-0.805923	-0.466208	-0.777902	0.0965184	-1.30115	-0.584826	-0.399204	-0.335309	-0.265257	0.639344	0.330377	-0.447025	0.502931	0.683803	-0.146213	1.70171	2.20117	2.67371
107839819	-0.788395	-1.01591	-0.64463	-0.597774	-0.825649	-0.515788	-0.752488	-1.21172	-0.883342	0.886664	1.30485	0.923426	-0.249419	-0.307898	-0.853335	0.285355	2.27205	1.32181	-0.399375	-0.0222501	-1.1892	0.910885	0.716036	1.63609
107856230	-0.655352	-0.619081	-0.613698	-0.546003	-0.481038	-0.559787	-0.563489	-0.416158	-0.49134	-0.288512	-0.457834	-0.39141	-0.310455	-0.351718	-0.169646	-0.0145638	0.229131	0.0848939	-0.373801	-0.0721925	-0.495679	2.35723	2.6744	2.5261
107847826	-1.17407	-1.1204	-1.24621	0.0391558	0.206918	-0.0316861	-0.87968	-0.697734	-0.91345	-0.600172	0.459557	-0.0934794	-0.451072	-0.457578	-0.549547	1.31107	0.334649	0.745226	-0.0280669	-0.187282	-0.724968	1.67864	2.0917	2.28847
107842302	0.470483	-0.286887	0.00985311	-1.20664	-1.23346	-0.939518	0.0923495	-1.02007	-0.559545	-1.34883	-0.0111292	1.21363	-0.438711	-0.892327	0.979927	1.25616	-0.66345	2.06577	0.672659	-1.19878	0.114248	0.811822	1.81591	0.296541
107847557	-1.08808	-0.811502	-1.23496	0.665304	0.979486	0.474959	-1.2747	-0.729809	-1.11703	0.0321734	-1.10169	-0.586694	-0.356233	-0.454117	-0.997164	0.43127	0.292645	0.644272	0.616043	-0.215095	0.231674	1.66931	2.10324	1.82668
107853182	-0.751653	-1.16751	-0.921237	-0.0767221	0.0743865	-0.0899695	-1.46675	-1.10434	-1.48487	0.069169	0.798805	0.367116	-0.788201	-0.423622	-0.343334	1.43214	1.03318	1.10466	-0.328143	-0.570711	-0.208748	1.222	1.6467	1.97765
107859877	-1.25756	-1.27886	-1.36448	-0.603324	-0.715189	-0.698845	-1.1413	-0.694665	-0.835261	0.338649	-0.0169682	0.391888	-0.336101	-0.300567	0.896406	-0.00757999	1.09618	0.341501	0.159338	0.672221	-0.31218	1.52248	2.05067	2.09355
107854884	-0.191523	-0.18939	-0.31661	-0.101626	-0.0913783	-0.289116	-0.368017	-0.241451	-0.360488	-0.620104	-0.604863	-0.742763	-0.618692	-0.581723	-0.256536	-0.115577	0.489639	-0.724993	-0.567211	-0.544566	-0.166777	2.0066	1.77528	3.42189
107851434	-0.460817	-0.457599	-0.470218	-0.448583	-0.416662	-0.455736	-0.471728	-0.36696	-0.430826	-0.474406	-0.198395	-0.457857	-0.452142	-0.452424	-0.437614	0.214853	0.19408	-0.275928	-0.36263	-0.394117	-0.397237	3.28119	2.07426	2.1175
107867625	-0.196009	-0.271468	-0.233418	-0.281286	-0.602034	0.21586	-0.431329	-0.492371	-0.504605	0.78501	-0.35856	0.734187	-0.680521	-0.696572	-0.596812	-0.262913	-0.40288	-0.659359	-0.756301	-0.691153	-0.601271	1.94685	2.00823	3.02873
107847727	1.12034	0.169665	0.536039	1.14972	0.905504	1.3259	0.479375	0.789749	0.372393	0.925222	-0.599517	1.39623	-0.60248	-0.837823	-0.171663	-0.153115	-0.421485	-0.950073	-0.599908	-1.09186	1.19699	-1.65113	-1.47548	-1.81261
107871349	-0.476955	-0.299406	-0.593426	0.0116818	0.0120483	-0.0420737	-0.670429	-0.655256	-0.652552	0.861175	-1.12479	-0.597655	-0.863287	-0.784419	-0.51756	0.4857	0.55121	0.768824	-0.819069	-0.605186	-0.506318	1.89025	2.71835	1.90914
107839311	-1.04983	-0.996711	-1.06815	-0.457556	-0.190107	-0.36557	-0.6341	-0.562765	-0.370596	-0.156081	1.51421	0.973339	-0.913945	-0.89909	-0.0311736	0.507063	1.57881	1.58409	-0.558214	-0.994308	-1.01373	0.851364	1.71592	1.53714
107859396	1.13972	1.39769	1.12205	-0.978535	-1.00951	-1.01188	-0.0203803	-0.104087	0.241494	-0.299841	1.76218	1.14825	-0.575561	-0.248996	0.854308	-0.220599	0.23065	-0.767177	-0.479804	-0.774994	2.06152	-1.18603	-1.09785	-1.18261
107853552	-0.453314	-0.446962	-0.450656	-0.414495	-0.340193	-0.445527	-0.442572	-0.375037	-0.367464	-0.44191	-0.214623	-0.402112	-0.40187	-0.416191	-0.232212	-0.206657	-0.0149806	0.0997691	-0.406615	-0.390032	-0.435463	1.46582	2.00108	3.73222
107850436	-0.794281	-0.756361	-0.789868	0.695878	0.97013	0.554667	-0.866407	-0.722919	-0.649795	0.808563	-0.39148	-0.39888	-0.799453	-0.871637	-0.67921	0.0685165	0.171061	0.594298	-0.850547	-0.549087	-0.534358	0.778234	2.66493	2.348
107873610	0.343128	1.08331	0.581044	1.03413	0.91867	0.981682	0.549125	0.553782	0.882568	-0.0352072	-1.1141	1.11755	-0.339447	-0.344398	1.17466	-0.398995	-1.36619	-1.91057	-0.826227	-1.15889	1.4163	-1.00279	-1.08861	-1.05053
107848225	0.635759	1.17161	1.60046	-0.159819	-0.30079	-0.473698	0.646853	0.679352	0.384461	-0.631817	-0.225312	-0.639394	1.86458	1.2946	-0.485563	-0.906227	-0.898607	0.0312965	0.0556459	0.805936	0.576079	-1.6076	-1.76829	-1.64951
107863395	-0.686725	0.804684	0.134024	-0.0963868	0.705914	-0.512856	-0.756983	2.13203	0.383275	1.12114	2.1534	-0.910542	0.268388	0.578766	-0.5141	-0.949019	-0.393075	-0.467877	0.142852	0.0412402	1.00095	-1.12833	-1.84751	-1.20327
107847462	-0.739418	-0.474783	-0.870747	1.16613	1.847	0.650189	-0.994003	-0.227921	-0.727702	0.316621	-1.57964	-1.74077	0.41328	0.0412315	-0.452687	-0.75427	-0.4666	0.577912	-0.564572	0.63129	-0.489169	1.29022	1.52521	1.6232
107840001	0.926366	1.04893	1.59316	0.786701	1.2889	1.40883	0.515836	0.776045	0.660536	0.659485	-1.96076	-0.188147	-0.594844	-0.575866	-0.32905	0.162275	-1.68044	-0.825157	-0.627692	-0.229314	0.40299	-0.700029	-1.15222	-1.36654
107842701	-0.991484	-0.95121	-0.740464	0.465003	0.25775	0.753559	-0.885595	-0.875987	-0.716803	0.115462	-0.368854	1.7872	-1.12713	-0.778481	-0.536846	0.399628	0.9081	-0.0452528	-0.546929	-0.970591	-0.503574	1.53954	1.80876	2.00421
107840280	-0.860195	-0.773261	-0.99072	-0.229233	-0.297501	-0.371896	-0.987029	-0.70724	-0.697828	-0.284722	-0.730257	-0.425675	-0.168897	-0.321196	-0.53016	0.384112	0.0571116	0.475533	0.0225728	0.140573	0.232856	2.03744	2.52991	2.4957
107843119	-0.875707	-1.07606	-1.11387	0.185912	0.817689	-0.527332	-1.02155	0.831493	-0.230465	-1.08615	0.0935852	-0.740139	-0.331086	-0.102706	-0.126321	1.7848	-1.11097	1.25697	-0.906228	-0.328879	-0.228207	1.21765	1.50421	2.11335
107871491	-0.413739	-0.63022	-0.604953	-0.152432	-0.350607	-0.178743	-0.794555	-0.553387	-0.743253	-0.0555231	-1.15762	-0.627835	-0.39645	-0.457007	-0.0975685	0.0880027	-0.0446198	-0.446478	0.295617	0.375257	-0.244878	2.07302	2.11559	3.00239
107847350	-1.08621	-0.832037	-1.06849	0.322137	0.257656	0.326114	-1.15321	-0.795145	-0.878764	0.766531	-0.404765	0.0897529	-0.56163	-0.641193	-1.03695	1.0605	1.03337	1.4482	-1.02532	-0.400203	-0.39771	1.19992	2.18897	1.58846
107845332	-0.182247	-0.511802	-0.579381	0.882071	1.02275	0.531125	-1.3117	-0.741603	-0.953377	0.491785	-0.284239	-0.693905	-0.699108	-0.696591	-1.05814	0.117756	-0.757526	-0.117459	-0.368969	0.115189	-0.481356	1.91487	2.28938	2.07248
107866274	-0.613459	-0.589922	-0.60887	-0.537605	-0.456698	-0.574906	-0.588818	-0.441101	-0.510098	-0.528114	-0.345241	-0.506647	-0.49353	-0.466284	-0.348426	-0.100877	0.621034	-0.111227	0.0838354	-0.130802	-0.191074	2.35224	2.3202	2.7664
107842374	-0.491702	-0.439522	-0.664939	0.106745	0.315374	0.0702344	-0.610504	-0.440041	-0.437449	-0.0708673	-0.633982	-0.0241129	-0.977193	-1.00174	-0.0818199	0.786924	0.148527	0.00622972	-0.910755	-1.03492	-0.49665	1.99188	2.15947	2.73081
107850707	-1.26696	-0.472162	-1.38856	-0.0996083	0.264195	-0.312377	-1.28432	-0.124045	-0.485477	-0.0330543	0.12921	0.43899	-0.990635	-0.401056	-1.00002	1.44075	1.03792	-0.358436	-0.331689	-0.5362	0.0157758	1.72153	1.90718	2.12905
107859510	-0.936126	-0.864779	-0.891998	-0.791104	-0.682179	-0.823213	-0.674906	-0.48271	-0.445769	0.0299048	0.2426	-0.0307133	-0.333907	-0.35897	0.897469	-0.369912	1.10061	0.224142	-0.313751	-0.429986	-0.555754	1.49352	2.26564	2.73189
107840920	-0.424856	-0.660035	-0.732195	-0.678825	-0.527843	-1.04329	-0.527772	-0.317894	-0.352943	-0.869125	-0.766141	-0.41106	0.00797493	-0.00206374	0.0187866	-0.152106	2.32454	0.0316795	-0.258299	-0.296508	-0.34051	1.69884	1.77785	2.50179
107862340	-0.376045	-0.270686	-0.439568	-0.879974	-0.660373	-1.02392	-0.660328	-0.505095	-0.526731	-0.305767	-0.119021	-0.154163	-0.66861	-0.603865	-0.370361	0.257825	1.37277	0.208471	-0.275486	-0.359401	-0.448293	1.91611	2.09692	2.7956
107871343	-1.41898	-1.34004	-1.36433	0.00132894	0.102131	-0.0679664	-1.11814	-1.07118	-1.17099	-0.291848	0.105728	0.343542	-0.43082	-0.363576	-0.417858	1.36321	1.06679	0.351856	1.17038	0.0816137	-0.37854	1.19057	1.61171	2.04541
107870563	-0.424773	-0.524921	-0.470614	-0.553105	-0.460332	-0.600066	-0.417836	-0.53054	-0.523722	-0.383129	-0.0182424	-0.284251	-0.681536	-0.64259	-0.468275	-0.111794	2.14478	0.487648	-0.590201	-0.583458	-0.622944	1.7722	1.88885	2.59885
107862278	0.838459	1.15794	1.17477	0.327987	0.815635	0.13823	0.790108	1.27039	0.611778	-0.236312	-0.705193	-1.38937	0.463956	0.130285	0.132514	-1.32867	-1.9066	0.986237	-0.191901	-0.0574829	1.0733	-0.955393	-1.45095	-1.68972
107875925	1.53658	1.25512	0.878907	-0.180757	-0.536282	-0.24194	0.860649	1.00189	0.393038	0.171386	1.31337	-0.632987	0.340803	0.174528	-0.980488	-0.499983	-0.897554	0.383387	1.19322	0.397257	-0.593899	-1.72983	-2.04616	-1.56026
107859901	0.0945942	0.444089	0.550297	-0.77348	0.10621	-0.603394	0.552689	0.920865	-0.254817	-0.825427	1.26521	0.790992	1.41152	0.0690445	-1.49952	0.649371	-0.500359	2.29461	-0.203113	0.191354	-0.49225	-0.589155	-1.97761	-1.62173
107838759	-0.901359	-0.895984	-0.902634	0.349175	0.809156	0.433268	-0.882487	-0.785373	-0.828432	-0.299494	0.819134	-0.441845	-0.753965	-0.700848	-0.831461	0.255058	0.423445	-0.226019	-0.326392	-0.12808	-0.644591	2.00173	2.36898	2.08901
107863093	1.36769	0.84905	1.96878	-0.13605	-0.51817	0.655128	1.37303	0.423751	1.07727	-0.0987268	0.649541	0.461244	-0.107197	-0.313135	0.133132	-0.756933	-0.560379	-0.618841	-0.751257	0.131337	0.16824	-1.40909	-2.00235	-1.98607
107880059	0.370509	-0.522525	0.4394	0.629817	0.405093	0.622106	0.257241	-0.24665	0.301157	0.847245	1.14992	1.33168	0.457865	0.869971	0.00590896	0.60912	-1.64329	-0.927844	-0.0610962	0.0799292	0.710335	-0.99709	-2.2509	-2.4379
107868306	-1.05298	-0.869206	-1.02035	-0.66132	-0.639282	-1.01689	-0.918553	-0.599759	-0.980707	-0.164366	0.760713	0.209546	-0.148533	-0.330517	-0.863623	0.974877	0.852406	2.1056	0.309621	0.0223575	-0.755131	1.46356	1.86589	1.45665
107845307	-0.698271	-0.653289	-0.726279	0.0454093	0.615726	-0.0274766	-0.447687	-0.486909	-0.508003	0.250964	-0.959297	-0.220942	-0.849578	-0.868583	-0.352536	0.883166	0.176544	0.599614	-0.710745	-0.781581	-0.857941	1.84248	2.03636	2.69885
107847543	-1.04255	-0.991041	-1.21329	0.165348	0.339697	-0.0462742	-1.15148	-0.869017	-0.886985	0.594113	-0.564443	0.128646	-0.627068	-0.551668	-0.423142	0.490593	0.627031	0.0688396	-0.128244	-0.195197	-0.133244	1.65495	2.12286	2.63157
107862953	-0.770421	-0.924017	-0.882922	-0.304358	-0.162847	-0.438769	-0.77121	-0.761323	-0.885035	0.502752	-0.565885	-0.541221	-0.422979	-0.354402	-0.503899	0.718449	0.805185	0.628115	-0.281943	-0.00176398	-0.706979	1.77382	2.53849	2.31317
107840589	0.749025	0.301982	0.694613	1.13041	0.513404	0.838298	0.831177	0.15365	0.817573	2.01603	-1.06919	-1.00567	0.673721	0.135348	-0.113745	-1.32604	-1.41326	0.503709	-0.206587	-0.311463	0.471257	-1.65276	-0.77376	-1.95773
107845384	-1.06231	-0.90714	-1.00738	-0.62434	-0.528213	-0.707153	-0.840699	-0.566948	-0.642516	-0.733043	0.450958	-0.565445	-0.397793	-0.1373	-0.198418	0.364678	0.782174	0.188147	0.759234	0.0500275	-0.109537	1.33842	2.48808	2.60652
107875420	-0.6594	-0.792319	-0.800139	0.226853	0.121648	0.395207	-0.351879	-0.943706	-0.864078	2.25635	-1.43789	-0.206877	-0.409306	-0.531944	-0.537386	-0.467375	0.0717168	-0.49096	-0.0247532	0.391474	-0.51674	1.94359	2.06801	1.55991
107867385	-0.708765	-0.683354	-0.712502	-0.115621	-0.152286	-0.25205	-0.594887	-0.77715	-0.886	0.484222	-0.352551	0.373167	-0.836157	-1.09109	-0.434193	1.20361	1.55151	-0.338741	-0.56038	-0.499197	-0.648974	1.99921	2.12295	1.90923
107849685	-0.440252	-0.39797	-0.947142	0.194649	0.615962	0.416902	-1.04469	-0.895	-0.746711	0.639045	-1.02743	-0.266184	-1.03307	-0.953493	-0.212322	0.667509	-0.295635	-0.497454	0.153304	-0.705772	0.409082	1.78381	2.3087	2.27417
107853621	-0.198081	-0.26833	-0.321353	-0.389555	-0.169197	-0.463549	-0.296368	-0.466073	-0.479615	0.0684464	0.358007	0.0255274	-0.991573	-1.19486	-0.42958	1.98742	-0.591411	-0.181875	-0.72128	0.373319	-1.45407	1.43103	2.63932	1.73371
107867622	-1.60816	-1.13237	-0.975151	-0.560625	-0.148093	-0.422924	-0.779115	-1.02268	-1.14847	-0.476513	1.89849	1.17776	-0.285488	-0.215308	-0.749211	2.08913	1.686	0.420908	0.55171	0.410406	-0.275822	0.429302	0.4607	0.675524
107876086	-0.43389	-0.489006	-0.644327	-0.364186	-0.092916	-0.36233	-0.169734	-0.319232	-0.431475	-0.00893088	-1.2909	-0.264232	-0.196768	-0.523546	-0.562658	0.306752	-0.842576	0.445681	-1.25673	0.926032	-0.193754	1.99743	1.96562	2.80568
107850664	-0.58157	-0.609582	-0.89862	-0.00395065	-0.0677947	0.16022	-0.687919	-0.806601	-0.456167	0.655302	-1.05064	0.41251	-0.92433	-0.769982	-0.131194	0.171145	0.645911	-0.357967	-0.868008	-0.352636	-0.210073	1.76357	2.52535	2.44303
107852495	-0.0383154	-0.0948743	-0.274836	-0.564233	-0.62773	-0.507266	0.142612	-0.184196	-0.0723685	-0.62938	-0.743466	-0.601803	-0.595589	-0.459995	1.11514	-0.390149	-0.657381	-0.83229	-0.165298	-0.24294	-0.351147	1.69482	1.67489	3.40581
107867922	0.0873638	0.498348	0.454549	-0.595117	-0.263547	-1.06852	1.21968	0.0166382	0.148378	-0.80112	2.65342	-0.213555	0.0800233	0.481789	0.537331	-0.417554	0.0191415	0.635271	0.478709	-0.380108	1.32386	-1.08394	-1.72468	-2.08636
107839494	-1.02612	-0.732311	-1.5662	0.793582	1.80724	0.602441	-1.11782	-0.120866	-0.595499	0.208665	-1.06137	-1.61574	-0.327241	-0.26672	0.117811	-0.0313036	-0.00602118	-0.0596227	-0.378663	0.168208	0.16969	1.19785	2.13772	1.70228
107863279	-0.601266	-0.683489	-0.553117	0.615752	1.16553	0.369952	-1.00953	-0.488637	-0.886102	-0.152663	1.39807	-0.853708	-1.05011	-0.967798	-1.18363	0.102445	0.97309	-0.0431016	-0.894327	-0.375246	-0.193452	1.50728	1.48005	2.32401
107853580	-0.0789458	0.189728	-0.373321	0.991973	1.54477	1.09655	-0.849756	-0.213875	-0.702855	0.482682	-1.68945	-1.35638	-0.44961	-0.613774	-0.754331	-0.507069	-0.502589	-0.858324	-0.897363	0.133136	0.375469	1.40956	1.54187	2.08191
107840215	-0.72371	-0.606153	-0.9977	0.667367	0.359861	0.783233	-1.32558	-0.628555	-0.944215	0.186192	-0.58561	-0.696605	-0.676101	-0.45516	-0.431285	-0.199485	0.0782881	-0.53267	-0.0183377	7.97789e-05	0.177988	1.75163	2.14482	2.67171
107845886	-0.239762	-0.424843	-0.77786	-0.737872	-0.627155	-0.822599	-0.236817	0.073856	0.509179	-0.925585	0.125246	-0.729904	-0.746691	-0.784551	0.959748	-0.186281	-0.0278728	-0.422285	-0.279724	-0.046708	-0.542295	2.48233	1.84723	2.56122
107869351	-0.564429	-0.46896	-0.594655	0.566243	0.375283	0.523185	-0.53359	-0.549942	-0.56254	1.27382	-0.652617	-0.350743	-0.644657	-0.65246	-0.414465	-0.522216	-0.420306	-0.498683	-0.68417	-0.662938	-0.670953	1.94895	2.15968	2.60117
107855692	-0.693901	-0.625564	-1.06334	-0.178594	0.307539	0.100735	-0.994085	-0.649161	-1.00387	0.206447	-1.17551	-0.720306	-0.326076	-0.525684	0.123207	0.174679	0.377963	-0.548347	0.464827	0.472931	-0.316002	1.81771	1.94778	2.82662
107864063	-1.15782	-1.3541	-1.39663	-0.656284	-0.367782	-0.58456	-1.29961	-0.314346	-0.464245	-0.647196	1.32134	0.790116	-0.451565	-0.753188	0.210291	1.39678	0.131972	1.87955	1.73796	0.487181	-0.793444	0.820354	0.397363	1.06787
107840366	-1.06053	-1.04971	-1.11551	0.417864	-0.0143391	-0.0650151	-0.910838	-0.754721	-0.769683	0.211289	-0.754856	-0.609857	-0.508617	-0.531444	-0.293237	0.418018	0.712691	0.00461541	-0.0643944	0.220064	-0.175279	2.07718	2.24108	2.37524
107867548	-0.48536	-0.538433	-0.563813	-0.433125	-0.390858	-0.408761	-0.557174	-0.446082	-0.458567	-0.184417	-1.0444	-0.751444	-0.335051	-0.378895	0.00192657	-0.12016	-0.349068	-0.601383	0.166059	0.37557	0.136886	2.12628	2.46582	2.77445
107839547	-0.329938	-0.0557823	-0.470696	-0.151051	0.0485107	0.0417199	-0.660167	-0.0776404	-0.323891	-0.708328	-0.0875895	-0.894218	-0.484554	-0.609921	-0.319064	-0.0706593	-0.10961	-0.24967	-0.662192	-0.834804	-0.41752	2.52342	2.06737	2.83627
107860266	-0.86584	-0.866195	-0.818515	-0.0182481	0.0665468	-0.0606244	-0.767101	-0.800281	-0.789426	-0.572763	1.564	-0.189907	-0.682553	-0.68592	-0.772566	0.308101	1.88749	0.564396	-0.63473	-0.485716	-0.691283	1.48468	1.8492	1.97724
107863753	-0.956606	-0.717446	-0.939884	0.90813	0.491496	0.154607	-1.31293	-0.599475	-1.02777	0.707395	-0.161547	-0.54695	-1.05984	-0.809911	-1.16921	0.182275	0.00341377	0.898229	0.116975	0.204808	-0.208836	1.61568	2.10757	2.11982
107866788	-0.291527	-0.520051	-0.572508	-0.822594	-0.755222	-0.850174	-0.40331	-0.364238	-0.272721	-0.209823	-0.175404	-0.20808	-0.753237	-0.711363	0.36084	-0.180426	1.22868	0.615539	-0.658002	-0.633698	-0.493687	1.48517	2.54805	2.63778
107862888	-1.02496	-1.06064	-0.969729	-0.0351422	0.373197	-0.288119	-0.696537	-0.865903	-1.05844	-0.469018	0.846027	-0.49013	-0.208367	-0.589511	-0.785561	0.604549	0.856941	1.62939	-0.279708	-0.120189	-0.937424	1.68201	1.87073	2.01653
107873099	0.05093	1.19794	-1.01109	-0.284561	1.19738	0.0494662	-0.617892	0.767748	1.36418	-0.376371	0.0185062	-0.87088	0.150412	0.670885	0.309385	-0.980565	-1.58356	2.91987	0.314737	-1.0637	-0.18735	-0.518721	-0.613293	-0.903454
107862528	-0.770673	-0.471572	-1.59952	-0.196282	-0.00817573	-0.414354	-0.840039	-0.274789	-0.713342	0.118148	0.248563	-0.924341	-0.34207	-0.573894	-0.363622	-0.01913	0.701217	-0.606117	-0.183343	0.150227	0.321795	2.4117	1.7741	2.57551
107870766	0.198072	1.17419	-0.104949	-0.191532	0.12528	-0.0105526	-0.741591	2.13135	0.68083	-0.216222	1.43817	-0.766221	0.588491	0.727059	-0.442689	-0.609666	0.20075	0.443209	0.189259	-0.693447	1.12652	-2.36068	-1.27118	-1.61445
107863639	0.0732144	0.73382	0.865218	-0.878584	-0.97164	-0.694496	0.831459	0.642506	0.501328	-0.903382	2.3908	0.778587	0.553588	0.484858	0.756647	-0.303723	-0.800477	0.663755	0.391404	-0.406359	0.269153	-1.59233	-1.50376	-1.88157
107873248	-0.766904	-0.342398	-0.581807	0.121867	0.584235	0.160694	-0.9507	-0.634026	-0.63169	0.543693	0.300793	-0.23266	-1.16769	-1.31835	-0.165925	0.0366265	0.608211	-0.219056	-0.74111	-0.140373	-0.819093	1.29023	2.8037	2.26173
107857565	-0.459655	-0.507101	-0.558815	-0.428281	-0.599658	-0.347042	-0.421145	-0.771814	-0.644101	0.243619	0.144691	0.0271035	-0.743967	-0.838775	-0.503506	-0.00310703	1.18705	0.270304	-0.146518	-0.790081	-0.71161	1.17437	2.83882	2.58922
107857412	-0.391827	-0.396839	-0.401643	-0.411104	-0.406858	-0.411939	-0.390987	-0.327851	-0.313443	-0.412355	-0.4077	-0.401013	-0.379125	-0.395025	-0.363811	-0.320378	-0.290221	-0.386835	-0.311288	-0.259907	-0.323906	2.4012	2.26165	3.04121
107843255	-0.48769	-0.446799	-0.516665	-0.365769	-0.38733	-0.262547	-0.713105	0.000273765	-0.413051	-0.235271	-1.01617	-0.50248	-0.504919	-0.513406	-0.567108	0.76478	0.322154	-0.902039	-0.224737	-0.205388	0.119589	3.0961	1.83773	2.12383
107842955	-0.889165	-0.67738	-0.569986	-0.0369436	0.671129	-0.279385	-0.916097	-0.299753	-0.817776	-0.21092	0.272485	-0.792455	-0.675694	-0.716527	-0.55154	1.121	0.395268	0.690462	-0.951912	-0.679462	-0.3815	2.01806	2.70937	1.56873
107843142	-1.22741	-1.19946	-0.663734	-9.85648e-05	0.418002	-0.197508	-0.929983	-0.161496	-0.211455	0.771291	-0.509928	-0.0636605	-1.25361	-0.901689	-0.515849	1.11027	-0.308132	0.989724	-0.254673	-0.650139	-0.250955	1.82192	2.03955	2.14902
107868273	-1.27023	-1.17007	-1.33738	0.541078	0.31867	0.876586	-1.09309	-0.882397	-0.972411	0.273484	-0.526565	0.194919	-0.538664	-0.262822	-0.624846	0.162603	0.51353	-0.523434	0.217371	0.407262	-0.285114	1.68091	2.34488	1.95573
107851070	-1.31691	-1.31966	-1.36594	-0.0486827	0.110559	-0.184864	-1.09885	-0.858697	-0.957934	-0.398774	1.13661	0.605694	-0.335954	-0.616276	-0.292776	0.486116	1.36625	0.449838	0.277366	0.113429	-0.950889	1.78536	1.83637	1.57862
107858542	-0.621361	-0.611836	-0.630084	-0.614694	-0.592776	-0.642056	-0.576282	-0.570001	-0.514301	-0.516761	-0.183028	-0.367148	-0.554323	-0.561977	0.46207	-0.477513	0.512174	-0.366645	0.330353	0.19158	-0.260682	1.78461	2.62559	2.7551
107870970	-0.454531	0.0302805	0.879696	-0.74752	-0.974404	-0.515794	1.94151	-0.0523566	0.411789	-0.591412	0.122017	1.53458	1.30646	0.754957	-0.448677	-1.02158	-0.631549	0.619536	1.38313	0.753069	0.119202	-1.11657	-1.85884	-1.44299
107865522	0.0468719	0.363213	-0.65841	-1.35969	-1.29306	-1.71943	1.34595	0.962568	1.46449	-0.239108	-0.33611	-0.626835	-1.0573	-1.01767	1.29173	-0.106924	0.9608	-0.236153	-0.450847	-0.651521	-0.34697	0.699794	1.30271	1.66191
107866663	-0.78962	-0.921026	-0.749719	-1.04142	-0.94539	-1.10946	-0.532843	-0.543462	-0.671661	-1.19347	1.28901	-0.560037	0.235984	0.233438	0.0495782	-0.295056	0.242824	0.539655	2.06494	0.895138	-0.689307	0.914377	1.81319	1.76434
107839764	-0.964866	-0.96191	-0.970734	-0.639503	-0.500482	-0.63963	-0.908663	-0.450494	-0.573628	-0.283512	0.158792	-0.516685	-0.135415	-0.437978	-0.472191	0.454551	1.13695	-0.26723	0.47478	0.126802	-0.334612	2.23786	2.06547	2.40233
107862090	-0.597321	-0.35779	-0.849034	0.392756	0.837542	0.163335	-1.15098	-0.0871324	-0.354792	-0.545611	-1.20122	-0.87604	-0.837297	-0.718402	0.00615313	0.939979	-0.520708	0.0677753	-0.602094	-0.558782	0.459431	1.95579	2.33137	2.10308
107868478	-0.239029	-0.330223	-0.186561	-0.877214	-0.819101	-0.749022	-0.283314	-0.724705	-0.764743	-0.419503	0.24412	-0.961719	-0.0477641	-0.318866	-0.719533	-0.533402	0.721446	0.71867	-0.069869	0.491373	-0.673032	1.52129	1.84467	3.17603
107866243	-0.439281	-0.286774	-0.525953	-0.357046	-0.398539	-0.32423	-0.519232	-0.18319	-0.2159	-0.563615	-0.502592	-0.0996445	-0.691428	-0.695536	-0.250577	0.279192	-0.166707	-0.338064	-0.469229	-0.553365	-0.234028	2.17313	2.36535	2.99726
107874024	-0.21	-0.439045	-0.34178	1.19691	1.48678	1.20439	-0.463649	-0.529444	-0.635356	0.655974	-1.17759	-0.41569	-0.868892	-1.09726	-0.544625	-0.228882	-0.120258	-0.314744	-1.00416	-0.751078	-0.781938	1.54036	1.52434	2.31563
107852976	-0.797097	-0.605117	-0.716899	-0.0147363	0.475404	0.0309047	-0.403711	-0.254998	-0.561086	-0.49568	-0.11054	-0.0241142	-0.861947	-0.783605	-0.273356	2.22388	-0.202691	-0.48331	-0.734361	-0.871284	-0.486988	1.60267	1.82475	2.52392
107875570	-0.798779	-0.287404	-0.900831	-0.335529	-0.425775	-0.629933	-0.742132	-0.561076	-0.723525	0.724887	-0.364176	0.863963	-0.92386	-0.754281	1.29168	-0.228647	0.160476	-0.267907	-0.173124	-0.518838	-0.55523	1.06755	2.74117	2.34132
107862399	-0.497195	-0.94012	-0.664635	-0.302763	-0.414327	-0.651567	-1.0482	-0.941038	-0.662093	-0.113907	0.462438	-0.593141	-1.27067	-0.921192	0.36121	0.779205	0.0278902	0.871451	1.25015	-0.407823	-0.22922	1.53858	2.39896	1.96801
107857885	0.379054	-0.74047	-0.166628	0.272561	0.932122	-0.142725	0.0475986	-0.686051	-0.356117	0.659736	-0.413279	-0.954381	-0.752952	-1.08868	-0.748609	0.981797	-0.506116	-0.0352353	-0.650498	-0.763542	-1.36727	1.53806	2.3827	2.17893
107851215	-0.468682	-0.46216	-0.487322	-0.463474	-0.434566	-0.462975	-0.476529	-0.435759	-0.428822	-0.488579	-0.382826	-0.493691	-0.408983	-0.402803	-0.392863	-0.0805677	0.198748	-0.268433	-0.271782	-0.178305	-0.382073	2.52163	2.61901	2.5318
107858780	1.8919	1.07149	1.73694	0.496588	0.170143	0.849479	0.952805	-0.177563	0.288135	0.676468	-0.865184	-0.375853	0.217249	0.21194	-0.95333	-0.0515995	-1.58611	-0.183066	0.656965	0.447835	-0.999887	-1.62211	-1.45946	-1.39378
107862491	1.11946	1.62287	0.968589	-0.157723	-0.268812	-0.0359006	-0.226886	0.710445	0.284606	1.25524	-2.13914	-0.216389	0.69498	0.858907	0.598025	0.0248906	-1.30163	-0.801185	0.545437	0.168608	0.692775	-1.39361	-1.31856	-1.68499
107854043	-1.09561	-1.10976	-0.982708	-0.0607844	0.0601275	-0.177595	-0.768961	-0.0601112	-0.173228	0.660078	-1.29322	0.195713	0.128671	0.0802283	-0.135959	-0.469371	0.280702	0.0237742	-0.522999	-0.175618	-1.04248	1.73993	2.324	2.57518
107859413	-0.76104	-0.956769	-1.09943	1.07027	1.03905	1.12401	-0.902754	-0.702147	-0.622571	0.993359	-1.83691	-0.366831	-0.526495	-0.436121	-1.03109	0.512812	-0.2516	0.506422	-0.545734	0.0575622	-0.149098	1.40888	2.01499	1.46124
107847630	-0.937193	-0.867404	-0.931882	1.02914	1.48194	1.88453	-0.810044	-0.555737	-0.971371	0.587573	-0.722458	-0.357286	-0.554735	-0.507761	-1.13534	0.0892059	0.0397011	-0.714055	-0.91294	0.347137	-0.164373	1.81983	1.54153	1.32199
107878332	0.561353	0.0709339	0.61381	0.59736	1.31418	0.58678	-0.483423	-0.587386	-0.340501	1.46223	-0.744601	-0.0156438	-1.4465	-1.50719	-0.556544	-0.608467	0.355391	-0.390409	-1.56294	-1.04467	-0.761356	1.14238	1.39815	1.94707
107875836	-0.547009	-0.985044	-0.726175	-0.5117	-0.639709	-0.98924	-0.760257	-0.655429	-0.752073	-0.0235077	0.778098	-0.461081	-0.389087	-0.62256	-0.392433	-0.265422	0.227236	0.878173	0.403834	0.243916	-0.49488	2.59831	2.10975	1.9763
107852167	-0.474536	-0.468275	-0.476346	-0.28334	0.0822517	-0.367845	-0.471018	-0.435534	-0.435244	-0.484482	-0.404792	-0.44355	-0.413872	-0.397476	-0.391709	-0.14723	0.0332381	0.0473132	-0.390716	-0.344664	-0.41538	0.911128	2.88503	3.28705
107852236	-1.02316	-0.000247919	-0.696711	-0.591067	-0.835621	0.793577	1.60288	-0.671231	-0.706443	0.466141	-0.976618	2.18464	-0.819922	-0.134421	-0.0562332	-0.786498	1.01112	-0.725911	-1.00103	-0.160106	-0.880346	1.03342	1.19193	1.78185
107842424	-1.10635	-0.225747	-0.881947	-0.128058	-0.092067	-0.596081	-0.917207	-0.598458	-0.872729	-0.806976	-0.606232	-0.761591	-0.231442	-0.989448	-0.0480708	0.346576	1.35288	1.14464	-0.237809	-0.0520639	0.22032	2.23965	1.62121	2.22701
107852920	0.682252	0.733973	0.168426	0.47711	-0.00932947	0.0356376	0.310356	1.37181	0.369574	-1.32031	-0.00363647	-0.304273	1.77549	1.35172	-0.584751	-0.918756	-0.383231	-0.127676	0.838877	-0.026733	0.877301	-1.76221	-1.24073	-2.31089
107879143	-0.434973	-0.41722	-0.51635	-0.387304	-0.348254	-0.47612	-0.463265	-0.302909	-0.201119	-0.404401	-0.538338	0.507484	-0.453541	-0.464141	-0.294942	0.0040152	-0.410691	-0.484298	-0.415832	-0.459185	-0.495229	3.14428	1.94466	2.36767
107875356	-0.354302	-0.583733	-0.37305	-0.780261	-0.867674	-0.804473	-0.440828	-0.582519	-0.253555	1.24366	-0.928347	0.0912287	-0.539717	-0.634901	-0.0487363	0.333277	0.0227203	-0.345546	-0.415401	-0.0527143	-0.537743	2.29836	2.6806	1.87365
107879653	-0.892111	-1.03671	-0.994511	-0.83799	-0.606038	-1.00293	-0.695471	-0.66166	-0.628089	-0.204622	0.603851	-0.111636	-0.335278	-0.181103	1.03201	-0.411463	2.74343	0.203671	0.110844	0.108972	-0.708608	1.27068	1.68727	1.5475
107839995	-0.161471	1.16976	0.277227	0.59464	0.96015	0.972114	-0.221553	1.75224	0.737733	-0.540464	-0.215437	-1.18569	0.642037	0.748827	-0.588776	-0.57146	-1.09258	0.652667	0.0853988	0.215595	1.07286	-1.61566	-1.74948	-1.93868
107858011	-1.09617	-1.13542	-1.1192	-1.1134	-1.05708	-1.06546	-0.655834	-0.77105	-0.642539	-0.96177	1.85628	-0.502795	0.574533	1.04596	0.674919	0.267663	2.02059	0.794742	0.377707	0.0399876	-0.333646	0.838496	1.25676	0.706718
107873823	-0.935848	-0.911711	-0.851747	0.166309	0.8829	0.350161	-1.01634	-0.327139	-1.25234	-0.599155	0.53955	-0.131292	-0.774495	-1.00837	-0.594466	0.540973	1.07854	-0.876692	0.365565	-0.0607715	-0.400962	1.60918	1.70056	2.50759
107850679	-1.0685	-1.15786	-1.17674	0.432792	0.551583	0.167218	-1.09647	-0.659315	-1.07189	-0.333322	-0.278325	-0.0203664	-0.385212	-0.647115	-0.551724	1.03661	1.13094	0.268964	-0.321098	-0.31453	-0.44878	2.08583	1.65701	2.20029
107870981	-0.648777	-0.677603	-0.689929	-0.587719	-0.573784	-0.555144	-0.665127	-0.655775	-0.663809	-0.420618	0.218513	-0.177648	-0.571119	-0.556394	-0.520587	0.419596	1.79191	0.115489	-0.118181	-0.321245	-0.575034	2.1658	1.61313	2.65405
107870973	-0.943804	-0.941915	-1.01187	-0.799787	-0.84306	-0.824007	-0.780737	-0.870671	-0.730171	-0.144888	0.603527	-0.228022	-0.522947	-0.34375	0.0687891	0.461518	1.41642	0.691944	0.0245064	0.33355	-0.645842	1.82016	2.22362	1.98744
107878547	-0.649526	-0.512884	-0.794948	-0.642015	-0.294213	-0.621974	-0.591823	-0.377889	-0.658582	-0.641459	-0.64416	-0.546735	-0.425993	-0.565298	-0.502356	0.215253	1.20522	-0.250148	0.206395	0.171024	0.026048	1.836	2.22589	2.83418
107869567	-1.28539	-1.17125	-1.31209	0.255271	0.424895	0.0822762	-1.13402	-0.759353	-0.906549	0.0519321	0.126723	-0.316609	-0.293875	-0.547778	-1.10391	0.988881	0.505227	0.397784	0.210643	0.193709	-0.385123	1.84321	1.95887	2.17652
107875763	-1.05432	-0.982217	-0.956436	-0.122795	-0.089007	-0.230104	-0.931909	-0.837221	-0.804438	-0.410161	0.371042	0.253484	-0.887878	-0.687344	-0.585749	0.689012	0.908673	0.0412088	0.755602	-0.368051	-0.443942	2.11234	2.12279	2.13742
107863575	-1.13191	-0.771332	-1.06753	0.290125	0.253337	-0.305837	-0.567133	-0.586907	-0.983837	-0.617529	2.44695	-1.03307	0.00346375	-0.279601	-1.38075	-0.146171	1.04856	1.61787	-0.0970864	-0.304454	-0.0453396	1.03192	0.906015	1.72024
107843004	-0.497889	-0.533579	-0.542637	-0.465284	-0.471036	-0.452722	-0.403927	-0.286119	-0.243679	-0.45745	-0.510672	-0.323887	-0.444287	-0.445325	-0.314805	0.0791438	-0.31683	-0.492458	-0.0575103	0.108945	-0.408036	2.37906	1.85959	3.2414
107866947	-0.592255	-0.000512912	-0.691632	0.921276	1.53723	2.05506	-1.18644	-0.472777	-0.886304	0.429445	-1.68	-0.311023	-0.196596	-0.232026	-0.277938	0.915268	-1.15806	-1.60337	-0.32529	0.775204	-0.168678	1.45482	0.781566	0.913031
107877748	-1.09917	-0.77696	-0.921207	0.0473644	0.217156	-0.306747	-0.363869	-0.895685	-0.693464	-0.1586	2.04389	0.624727	-0.839302	-1.05117	-0.563637	0.834241	0.959627	1.56922	-0.652231	-0.924782	-1.0877	1.18135	1.28565	1.57131
107850924	-0.867712	-0.816282	-1.06059	0.891459	1.17018	0.714853	-1.10514	-0.611619	-0.883037	0.189537	-1.72894	-0.698204	-0.0547145	-0.45149	-0.672416	0.093796	0.711403	0.62597	-0.614961	-0.118823	-0.163067	1.79144	1.76812	1.89023
107861777	-0.329348	-0.412051	-0.0313188	1.29961	1.15353	0.994102	-0.196401	-0.5088	-0.546778	0.35988	1.95908	0.367523	0.672862	0.626558	-0.0123007	-0.361691	-1.23359	1.1896	0.769408	-0.11166	-0.388387	-1.71723	-1.52476	-2.01784
107872466	0.330495	0.166421	0.292536	-1.11255	-0.885717	-1.14255	0.143201	0.227859	0.0816673	-0.908937	-0.68933	-0.805929	-0.103393	-0.25258	-0.00988098	-0.891087	0.053828	-0.536255	-0.36569	-0.0925062	-0.393612	2.24328	2.56682	2.08391
107850598	-0.783509	-0.847081	-1.36245	0.200797	1.0696	-0.0291346	-1.16013	-0.655116	-0.634615	0.5017	-1.55574	-0.245338	-0.988428	-0.541034	-0.105219	0.721392	0.229248	0.800576	-0.127821	-0.428244	0.322175	1.87586	2.3167	1.42581
107854547	-0.0670286	1.6279	0.860248	-0.509808	-0.109775	-0.669783	0.62743	1.38194	0.808145	-0.60419	0.828215	-1.71119	1.29868	1.18836	-0.796021	-0.685749	-0.790302	0.210737	0.101719	0.753799	0.448548	-1.60175	-0.86042	-1.7297
107847587	-1.23915	-1.21291	-0.69715	0.0129477	1.38651	-0.842608	-0.313036	0.394273	-1.06938	-0.943773	-0.198107	-0.759868	0.111839	0.264277	-0.873403	0.340989	0.694356	2.71895	-0.612543	1.14141	-0.687001	-0.0438228	1.34883	1.07837
107860547	0.32534	-0.00281898	0.675547	0.106676	-0.325453	1.13351	1.86877	-0.345053	0.207936	1.25598	-0.377114	1.62869	-0.0540943	0.409117	0.388181	-0.650918	0.554225	-2.06682	0.204247	0.0220636	-0.187823	-1.58819	-1.48445	-1.69755
107868752	-0.711056	-0.707223	-0.710512	-0.462312	-0.335782	-0.464007	-0.668296	-0.680919	-0.689534	-0.390735	0.759912	0.591417	-0.682808	-0.681884	-0.630421	0.68559	1.1688	0.189252	-0.611048	-0.605103	-0.664578	2.73983	1.42596	2.13546
107850861	0.351468	0.148337	-0.282756	0.598694	-0.330482	-0.42949	1.14534	0.768206	-0.0684843	-1.01452	1.80854	-0.620209	0.626982	1.44863	1.01746	0.343233	0.57342	-0.94198	-1.00402	0.0400165	0.866184	-1.59289	-1.26981	-2.18187
107867686	-0.314947	-0.0732792	-0.448449	-0.198663	-0.0440056	-0.262632	-0.471043	0.19178	-0.111166	0.535222	-1.43839	-1.55502	-0.236584	-0.390077	-0.179368	-0.328319	-0.988039	-0.110477	-0.328754	0.347195	-0.433599	1.96967	2.27121	2.59773
107842508	-0.228864	-1.16446	-0.439987	-0.95128	-0.93351	-0.69896	1.12189	-1.47636	0.106425	1.64901	-0.0167437	-0.382912	-0.216139	-0.64596	-0.153304	0.42494	1.51347	-0.0554985	-0.265396	-0.0327154	-1.66134	1.33941	1.25927	1.90902
107853699	-1.25835	-0.98826	-1.24718	-0.515092	-0.304396	-0.781612	-1.07493	-0.520308	-0.777683	-0.643814	0.380186	-0.450882	-0.331775	-0.0202072	-0.995074	1.21602	1.77461	1.73527	0.162752	0.275963	0.0382585	1.37387	1.35012	1.60251
107863735	-0.531034	-0.946814	-0.800274	-0.771076	-0.596543	0.250959	-0.308909	-1.07724	-0.903359	-0.509108	0.428258	1.75081	-0.801821	-0.870535	-0.490464	1.68184	1.23916	-1.10832	-0.0903537	-0.0377439	0.017086	1.1694	1.14729	2.1588
107858581	-0.179918	0.260076	-0.0077516	-0.642015	-0.679922	-0.773039	-0.108564	0.553276	0.228592	-0.418121	-0.860609	-0.981162	-0.916149	-0.75214	-0.26663	-0.0525889	-0.584036	-0.919106	0.146465	-0.306761	0.315948	2.15754	2.70038	2.08623
107860527	0.232024	0.121058	0.226316	-0.458719	-0.224787	-0.479534	0.596739	-0.016533	-0.00454254	-0.108881	-1.14956	-0.804788	-0.334712	-0.510866	0.473695	-0.698815	-0.86956	-0.8913	-0.927719	-0.312154	-0.607507	1.65825	2.11295	2.97895
107875633	-0.677673	-0.646936	-0.775597	0.173837	0.112775	-0.14808	-0.752018	-0.458221	-0.424926	0.470775	-0.79503	-0.552441	-1.02261	-0.910941	0.121185	0.46214	-0.480132	0.644562	-0.477178	-0.429449	-0.340695	2.15779	2.63031	2.11855
107847306	-1.01228	-0.377677	-0.752204	1.17669	1.50564	0.851569	-0.853735	-0.607628	-0.801334	0.970756	-0.803004	-1.27257	-0.675241	-0.621758	-0.68065	0.576353	-0.684602	0.262503	-0.716669	-0.565797	-0.00443118	1.42791	2.14841	1.50975
107875915	-0.488821	-0.687142	-0.366018	-0.686577	-0.693579	-0.567209	-0.503851	-0.792849	-0.471197	-0.291071	-0.44214	-0.0473608	-0.5645	-0.615316	-0.324762	0.223496	0.859684	-0.0398305	-0.0506896	-0.186679	-0.493889	2.13395	2.34947	2.74689
107860695	-0.497591	-0.492576	-0.500434	-0.170635	-0.177697	-0.131752	-0.453535	-0.478849	-0.477864	-0.198422	-0.146743	-0.245007	-0.480026	-0.423973	-0.290185	-0.27481	-0.301873	-0.382914	-0.469519	-0.453728	-0.489201	2.07976	2.13475	3.32283
107872772	-0.459905	-0.880717	-0.928101	0.0876789	-0.371562	0.0595855	-0.421245	-1.2148	-0.822829	0.73256	-0.38573	0.909602	-1.14702	-0.941162	-0.482894	1.33279	1.14365	0.625841	-0.618117	-0.566497	-0.976009	1.77674	1.50808	2.04007
107877689	-0.744348	-0.799587	-0.767132	-0.488517	-0.202094	-0.581847	-0.296261	-0.486186	-0.670292	-0.713436	0.69532	-0.55524	-0.308162	-0.402276	-0.225693	0.526006	0.0331925	0.489716	0.0375799	-0.4446	-0.633766	1.56468	1.41724	3.5557
107839171	-0.967361	-0.618607	-0.643694	0.0843281	0.448018	0.156751	-0.746035	0.251441	-0.490924	1.08248	-0.528268	-0.188575	-0.584503	-0.563078	-0.310653	-0.372018	0.438774	-0.674446	-0.911019	-0.792469	-0.459616	1.82483	3.21222	1.35243
107863740	0.192227	-0.519664	0.305869	0.510864	0.551742	0.779674	-0.27012	-0.855761	-0.705189	1.13489	-1.11821	-0.174764	-0.784407	-1.1332	-1.05623	0.186477	-0.00651505	-0.361436	-1.24177	-0.57819	-0.756598	1.70016	1.77283	2.42733
107840041	-1.28173	-0.868756	-1.15937	-0.218187	0.316885	-0.601017	-1.39422	0.107716	-0.964112	-0.140588	0.379125	-0.0979982	-0.0509103	0.185772	-1.05855	1.93493	-0.493281	1.82399	-0.0677229	-0.372777	-0.4572	1.36182	1.27818	1.83801
107842900	-0.829466	-0.884868	-1.06165	-0.221925	-0.132536	-0.502381	-0.88322	-0.487712	-0.584111	-0.67726	-0.304696	-0.423201	-0.550574	-0.441954	0.172279	0.108273	3.10959	0.0285496	0.126653	-0.123099	-0.229501	1.43596	1.6418	1.71505
107839167	-0.653212	-0.682883	-1.24429	1.02356	0.61794	1.38344	-1.02267	-0.359617	-0.9325	0.102352	-1.92498	-1.09622	0.111846	0.666898	-1.13375	0.394851	-0.813068	1.60902	0.311079	0.252049	-0.376997	1.46154	1.21543	1.09018
107845368	-1.17085	-0.947258	-1.16865	0.00221522	0.280948	-0.121636	-1.17205	-0.509118	-0.894942	-0.235331	0.129867	-0.695058	-0.239528	-0.336326	-0.792612	0.72187	0.620621	0.407916	-0.282392	0.00491913	-0.127681	1.89818	2.24796	2.37893
107838708	-1.4414	-1.03063	-1.281	0.72696	0.763687	0.558006	-1.2514	-0.544791	-1.06986	-0.0827978	-0.767997	0.113049	-0.307747	-0.517828	-0.871011	1.54646	-0.202798	0.451633	-0.322777	0.155944	0.111834	1.84231	1.58775	1.83441
107839663	-1.05881	-1.25166	-1.38215	-0.0614832	-0.230652	0.243742	-1.0175	-1.01755	-1.00696	0.115076	0.858399	1.21166	-1.06365	-0.733295	-0.602817	1.38723	1.21318	0.884249	0.208791	-0.483615	-0.499303	1.6563	1.17161	1.45921
107867407	-0.580321	-0.775961	-1.11543	0.71245	0.733931	0.743104	-0.777906	-0.659131	-0.794702	0.176725	-1.03856	-0.379616	-0.871274	-0.853802	-0.298897	0.0778338	0.505773	-0.119554	-0.704834	0.0450316	-0.405961	1.76041	2.28094	2.33975
107875300	-0.422464	-0.544442	-1.47083	0.808846	1.31857	0.925459	-1.42333	-0.517206	-1.04638	0.386261	-1.48964	-0.503592	0.378505	0.0618779	-1.53481	0.239268	0.327533	0.356002	-1.06062	0.718048	0.0642496	1.3787	1.28869	1.7613
107870311	-0.243955	-0.671366	-0.586984	-0.00294556	0.200562	0.429729	-0.412969	-0.463344	-0.548697	0.0553143	-1.17991	-0.713161	-0.891761	-0.757691	-0.0989698	0.64757	0.411585	-0.475476	-0.753267	-0.488954	-0.376103	2.64735	2.29263	1.98082
107842460	-0.98882	-0.706381	-0.947674	1.07691	1.88927	0.741509	-0.96681	-0.250857	-0.686512	1.04814	-0.929223	-0.930305	-0.387745	-0.672473	-0.663382	-0.0195163	0.130151	0.259199	-1.14214	-0.272403	-0.500315	1.30681	1.98029	1.63228
107858721	-1.21495	-0.927735	-1.34752	-0.274377	-0.0831913	-0.665483	-1.19359	-0.680768	-1.20347	-0.0870882	1.09231	-0.22902	-0.619003	-0.38281	-0.57091	0.430663	1.18254	1.31089	0.371935	-0.0547435	-0.161914	1.75366	1.86206	1.6925
107873942	-0.932593	-0.966632	-0.892981	-0.289189	-0.287176	-0.56613	-0.924258	-0.645219	-0.638862	-0.129964	-0.495554	0.13524	-0.343945	-0.473501	-0.31512	0.166083	0.697751	0.432871	0.146979	-0.0434823	-0.576102	2.03264	2.08584	2.8233
107862293	-0.622795	-0.592483	-0.769843	-0.768876	-0.757973	-0.742698	-0.291731	-0.431829	-0.772686	-0.290628	-0.684918	-0.456942	-0.333404	0.0437822	-0.880563	1.1166	0.0850389	0.245252	0.117207	0.287113	-0.356631	1.94846	2.59829	2.31226
107877930	0.418115	0.642943	0.559918	0.92039	1.24401	0.358571	-0.206812	0.500112	-0.0975686	0.0983073	-0.0629976	-0.525584	1.78007	1.15674	-0.742751	-0.715705	-1.04624	1.23806	-0.354037	0.253355	0.174584	-1.66626	-1.76771	-2.15952
107850734	-1.08517	-0.859298	-1.12215	-0.111918	0.235341	-0.202855	-0.837658	-0.416434	-0.611915	0.400011	-0.390577	-0.280508	-0.90015	-0.786659	-0.690078	0.404697	2.20423	-0.446804	0.470898	-0.0762313	-0.227702	0.943504	1.91692	2.4705
107853945	-0.837989	-0.949207	-0.873974	-0.620108	-0.427046	-0.602931	-0.723445	-0.735401	-0.658264	-0.310741	0.267859	0.0403429	-0.548293	-0.541256	-0.372336	0.497523	0.179773	0.351488	0.608246	-0.248535	-0.407124	1.80459	2.5005	2.60633
107853005	-1.51108	-1.0768	-1.37424	0.871414	0.938717	1.22898	-1.31669	-0.658451	-0.730731	-0.429429	0.750513	-0.38226	-0.578355	-0.212787	-0.900331	-0.252362	0.71021	-0.397506	-0.091544	-0.0526459	0.419014	1.21247	1.91816	1.91574
107847022	-1.18959	-1.199	-1.2207	-0.837057	-0.638712	-1.0455	-0.572747	-0.763959	-0.71739	-1.24166	1.04041	-0.394525	-0.266824	0.288728	-0.328863	1.1856	2.03488	0.60443	0.91066	0.281065	0.207565	1.16684	1.6	1.09636
107860697	-0.776534	-0.795111	-0.752614	0.757108	0.682535	0.634849	-0.914046	-0.903153	-0.906109	0.296483	0.38674	0.303757	-0.644693	-0.648143	-0.867434	0.0515766	-0.115297	0.508047	-0.768889	-0.919562	-0.819769	1.79196	2.13336	2.28494
107863204	-0.585733	-0.648793	-0.518223	-0.397421	-0.287926	-0.310991	-0.357693	-1.01102	-0.795451	1.17437	0.146366	0.656872	-0.942808	-1.04417	-0.468727	0.465314	1.25428	0.725612	-1.07317	-1.01012	-0.660375	1.97256	1.64441	2.07284
107839284	-0.607477	-0.209223	-0.570003	0.443128	0.996841	-0.169883	-0.540773	0.078895	-0.29128	-1.77842	-0.0711668	-0.958495	-0.71614	-0.376807	0.10874	0.521428	-0.851034	0.116925	-0.456317	-0.81829	-0.00419485	1.08684	2.50146	2.56525
107850892	0.487751	0.78753	-0.580039	-0.916891	-0.982197	-1.02471	-0.40784	-0.251413	-0.473192	-1.04824	-0.00387708	-0.539182	-1.14655	-0.891252	0.362802	-0.166431	0.526005	1.49313	0.768905	-0.382263	-0.994959	1.2089	2.55219	1.62182
107838693	-0.412891	-0.363434	-0.492833	0.868543	1.00544	1.14633	-0.71066	0.887486	-0.241945	0.353359	-1.42606	-0.509279	-0.755584	-0.967925	-0.996293	0.603759	-0.600471	-1.06601	-1.04009	-0.377735	-0.349883	1.83343	1.87696	1.73578
107875267	-0.534215	-0.634139	-0.694222	0.865788	0.845941	1.06938	-0.408938	-0.426857	-0.573015	0.79941	-1.82881	1.0642	-0.829173	-0.951952	-0.392593	0.40196	-0.457829	-0.804944	-0.560361	-0.84935	-0.385464	2.0114	1.4467	1.82707
107871360	-0.470948	-0.491947	-0.931737	-0.248348	0.255425	-0.294101	-0.988327	-0.45046	-1.22352	0.149948	-1.47202	-0.687465	-0.414679	-0.769998	0.672726	0.241657	-0.363218	0.355501	-0.120648	0.35885	0.356521	2.01408	2.14415	2.37856
107864467	-0.467806	-0.126694	-0.481387	1.29501	1.79235	1.81542	-0.894157	-0.425307	-0.718552	-0.00113054	-0.849382	-1.40284	-0.195017	-0.5555	-1.03298	-0.407852	0.236667	-0.24499	-1.11436	-0.196214	-0.49736	1.08699	1.57583	1.80925
107872682	-1.02571	-1.27592	-1.07601	-0.272165	-0.146659	-0.827737	-0.590021	-0.788265	-0.35994	-0.731819	-0.241172	-0.226161	-0.493918	-0.289932	-0.32266	1.7944	0.665097	0.797034	0.0986531	0.422716	-0.404374	0.772519	1.65493	2.86711
107843326	-0.0508562	-0.424944	-0.105544	-0.297955	0.0540661	-0.686951	0.438238	0.498788	0.156848	-0.753428	1.38396	1.05177	1.09321	0.744824	0.216935	-0.617427	-0.225851	2.59319	0.266415	-0.230516	0.0728089	-1.39887	-1.82595	-1.95276
107850211	-0.479196	-0.281595	-0.745701	-0.41474	-0.257688	-0.579134	-0.619692	-0.345506	-0.583861	0.382375	-1.42176	0.0960407	-0.536756	-0.678971	-0.323044	0.0543697	-0.365702	-0.929403	0.498782	0.200931	0.404562	2.27607	1.97603	2.6736
107859793	-0.673536	-0.963038	-1.11232	0.735301	0.592492	1.05614	-1.04139	-0.899392	-0.928005	1.06749	-0.918308	0.653656	-1.14786	-0.870581	0.0016231	0.68145	0.26026	-0.484158	0.332294	-0.649078	-0.886952	1.55393	1.89078	1.74919
107861633	1.02426	0.949624	0.676574	-0.388858	-0.975092	-0.374895	0.583804	0.37868	1.37702	-0.954626	-0.130121	-0.285136	0.356737	1.17846	0.452529	-0.422019	-0.698181	-0.0119129	1.15676	0.0505145	1.4902	-2.03285	-1.48455	-1.91692
107872983	-0.131133	-0.9491	-0.967996	1.34185	0.107659	1.16485	-1.00636	-1.30925	-0.886579	0.25703	-1.64847	1.02446	-0.766442	-1.16481	-0.47515	0.6291	0.595115	0.339659	-0.57901	-0.28667	0.103961	1.61393	1.29469	1.69867
107873706	0.745165	1.10859	0.563813	0.341566	1.29005	0.445801	0.271719	1.78998	0.255756	-1.22399	0.60372	-0.869985	0.999411	0.663025	-0.351317	0.182418	-0.998098	-1.14122	-0.316734	-0.0486309	0.71982	-1.72933	-1.638	-1.66352
107838983	-0.14622	-0.347448	-0.50772	-0.0790168	0.841768	0.0806762	-0.706969	0.0688699	-0.157748	0.628804	-1.50955	-0.738778	-0.773789	-0.700969	-0.0768974	-0.265924	-0.577835	1.37204	-1.2054	-1.54839	1.11408	2.21215	1.81869	1.20557
107863712	-0.958056	-0.958525	-0.958792	-0.959088	-0.944501	-0.955004	-0.868216	-0.725257	-0.735924	-0.6743	-0.253087	-0.645651	1.01125	0.616954	0.0010359	-0.511632	1.71133	1.95007	0.46232	1.04161	-0.316765	0.680694	1.62825	1.36128
107873623	-0.599773	-1.22871	-0.916243	1.03304	0.306032	1.03193	-0.797351	-1.49027	-1.13349	1.39161	-1.43617	0.962197	-0.773974	-0.695296	0.364926	0.483088	1.16917	-0.516119	-0.0362538	-0.137356	-0.873557	1.3629	1.06977	1.45991
107867015	-0.407125	-0.660478	-0.560822	0.29121	0.246267	-0.321861	-0.709798	-1.0359	-0.893508	-0.787459	-0.356689	0.645569	-0.78387	-0.67144	-0.877614	0.279888	1.50487	0.697196	0.650183	-0.705239	-0.972622	0.892871	1.68596	2.8504
107868175	-0.739129	-0.704367	-0.875194	0.144597	0.299899	-0.000141586	-0.91621	-0.298476	-0.611028	-0.000659034	-0.935074	-1.10782	-0.331084	-0.322817	-0.511969	0.236141	-0.474796	0.147951	-0.233794	0.0768838	0.0774438	2.35498	2.61183	2.11282
107862850	-0.231702	-0.800093	-0.496813	-0.178147	-0.0883204	0.123878	0.151948	-0.958534	-0.484023	0.645992	-1.09858	-0.238215	-0.59271	-0.955244	-0.0402234	-0.178905	-0.288061	0.0805928	-0.336255	0.0753497	-1.0617	2.27616	1.88274	2.79086
107861766	-0.225916	0.0621683	0.0151028	0.46957	0.656541	-0.067508	-0.357149	0.179878	-0.60294	-0.487799	1.0571	-1.07494	-0.572728	-0.445429	-0.74955	-0.0672067	-0.583713	-0.323591	-0.477295	-0.90438	-0.954217	0.761399	0.902358	3.79025
107878467	-0.579902	-0.744476	-0.748818	-0.279879	-0.339345	-0.365135	-0.595885	-0.652863	-0.73615	0.159204	-0.213967	0.855827	-0.833222	-0.767369	-0.692317	0.839945	1.85396	-0.358332	-0.542788	-0.58304	-0.584216	2.5051	1.60753	1.79613
107870211	-0.517009	-0.609945	-0.688392	-0.581909	-0.546183	-0.672709	-0.523225	-0.366606	-0.254324	-0.218843	-0.621892	-0.509911	-0.542181	-0.618132	-0.000430803	-0.308701	0.834501	0.689035	-0.393429	-0.0530408	-0.599344	1.94337	2.37394	2.78536
107866759	-0.727577	-0.627683	-0.783098	-0.668758	-0.49922	-0.730889	-0.678066	-0.438996	-0.490864	-0.425179	-0.177076	-0.538957	-0.387788	-0.372769	-0.151373	-0.189693	0.527807	0.261372	-0.126539	0.0151455	-0.08399	2.07568	2.92022	2.29829
107878244	-0.0200488	-0.40775	-0.51036	0.943595	1.24066	0.917442	0.0506972	-0.328503	-0.304979	-1.20928	0.212339	-0.780245	-0.94437	-0.911284	1.71146	-0.529296	-0.0392344	-1.48537	-0.614234	-0.530093	-1.11521	0.919293	1.6213	2.11348
107852400	-0.50085	-0.348358	-0.633324	-0.143836	0.230503	-0.214687	-0.85741	-0.273556	-0.557781	-0.0314719	-1.01845	-0.819351	-0.585542	-0.667923	-0.524192	0.135546	-0.365436	-0.746255	-0.00400623	0.458452	0.325187	2.17071	2.24612	2.72591
107875955	0.426824	0.912499	0.997539	1.53166	0.743557	1.41321	0.818402	1.08669	0.0587447	0.688383	-0.218179	0.431996	0.144044	0.670439	-1.05569	-0.31008	-0.628861	-2.14617	-1.04785	-0.759034	-0.0327226	-0.754217	-1.17617	-1.79501
107878161	-1.34911	-1.32821	-1.37043	0.199023	0.134759	0.578895	-1.01644	-0.957574	-1.03632	1.81901	-0.395826	0.348345	-0.657564	-0.648603	-0.559331	0.744515	0.494065	-0.237252	-0.342137	0.685975	0.0513162	1.83274	1.63474	1.37541
107847878	0.496458	0.232114	0.109917	0.580372	1.06892	0.187159	1.11958	0.468387	0.370025	-1.35873	0.625384	0.00975655	-0.181705	0.299509	0.226891	0.17292	1.22143	-0.641002	2.02666	-0.803439	-0.885388	-1.95819	-1.93004	-1.45698
107864782	-0.984155	-0.897797	-1.12824	0.0594375	0.545161	-0.224714	-0.999438	-0.78226	-1.07016	-0.228568	0.0953157	-0.500896	-0.293682	-0.524771	-1.01799	0.718587	1.51592	1.14571	-0.448515	0.0186395	-0.546397	1.89103	1.48087	2.17692
107851630	-0.984684	-0.988347	-1.00611	-0.930441	-0.851432	-0.850417	-0.933847	-0.758267	-0.912133	-0.90126	1.5269	-0.41	0.0497272	-0.0302221	-0.786379	1.02672	0.809422	1.04117	0.892826	1.0749	-0.424284	1.8776	1.14304	1.32553
novel.2232	-0.150891	-0.262208	-0.369877	-0.475143	-0.446659	-0.494218	-0.621428	-0.59761	-0.553557	-0.442764	-0.41881	-0.462905	-0.592143	-0.550671	-0.400725	-0.142781	-0.17627	-0.323298	0.221169	0.0617585	-0.376885	2.22862	2.81143	2.53587
107851364	-0.138801	1.17589	0.715344	-0.282071	-0.0671259	-0.127902	0.417409	1.56071	0.92161	-0.465578	1.16543	-1.0894	0.851669	0.674029	-0.44223	-0.94171	-0.748305	-0.0863552	0.458776	0.358547	1.42117	-1.5377	-1.98903	-1.80436
107845139	-1.21693	-1.48094	-1.41062	0.828823	-0.249655	0.624581	0.15594	-0.446193	-0.377295	2.6235	-1.4002	-0.551582	-0.177618	-0.196444	-0.0415257	-0.111497	-0.263696	0.00703309	-0.178865	0.97537	-0.846561	1.51342	1.30119	0.919771
107870816	-0.814456	-0.948372	-0.697628	0.737997	1.17687	1.11716	-0.197706	-0.521918	-0.538083	1.21758	-1.92905	0.061377	-0.930556	-0.657721	0.0817703	-0.2717	-0.142126	-1.33094	0.0691673	-0.285812	-0.249078	1.95671	1.44283	1.6537
107864627	0.235005	0.947083	1.07216	0.316706	-0.246105	-0.727153	-0.458126	1.32895	-0.324928	-1.43447	2.34757	-0.46947	0.923826	0.320849	-0.864259	0.495255	-0.702799	1.05234	-0.17615	-0.768778	1.0159	-1.21712	-1.11195	-1.55435
107843051	-0.507612	-0.0998744	-0.476281	-1.02757	-0.283977	-0.942612	-0.547791	0.350314	-0.247722	-1.18507	0.0558106	-0.757061	-0.482929	-0.418315	-0.337545	-0.765093	1.87224	-0.0330809	0.0828598	-0.246552	-0.0147556	2.0091	1.20074	2.80279
107851057	-0.767868	-0.744501	-0.983962	-0.545962	-0.628864	-0.495654	-0.502146	-0.514447	-0.645226	-0.182646	0.294221	0.227381	-0.437007	-0.0973867	-0.435338	-0.0914947	0.805947	-0.131381	0.378508	-0.610232	-0.816957	2.37572	1.72528	2.82402
107847397	-0.642279	-0.244977	-1.724	0.867527	0.764872	0.611752	-0.978194	0.626845	-1.02879	0.835433	-1.11299	-1.60946	0.808487	0.346948	-0.735625	0.876076	0.390384	-1.12523	-0.209839	0.195329	-1.12833	1.54671	1.11495	1.55441
107858183	0.705432	0.993145	0.791321	0.0266787	-0.292616	0.145617	0.809089	2.02979	1.3066	-0.0116282	-1.33692	-1.15463	1.07097	0.676498	-0.141038	-0.87278	-1.30145	-1.27487	0.0434229	0.286949	1.06864	-1.13727	-1.21283	-1.21814
107862972	0.129465	0.219513	-0.0494636	0.626399	0.786114	0.793324	-0.885937	-0.559286	-0.710592	1.5261	-1.13822	-0.589353	-0.985734	-0.965565	-1.08647	0.906233	0.0357929	0.702595	-1.34825	-0.87519	-1.1932	1.35169	1.60429	1.70575
107872935	-0.426512	-0.606487	-0.661475	-0.970251	-1.14056	-0.76589	0.319383	-0.802973	0.500586	1.56794	-0.861369	1.29525	-0.955933	-0.429761	0.874091	0.941021	-0.221228	-0.810809	-1.17834	-0.785552	0.461608	1.48207	2.03366	1.14152
107854752	-0.197279	0.276875	-0.843994	0.613257	0.954231	0.373634	-0.345005	0.0948491	-0.958278	-0.0611247	-1.4391	0.219089	-1.40373	-0.905791	0.0297599	1.1641	0.134638	-1.54882	0.192413	-1.02207	-0.551807	1.2688	1.66581	2.28954
107855770	-0.681338	-0.745404	-0.844678	-0.0789358	-0.0955588	-0.0864963	-0.786682	-0.695054	-0.81114	0.660458	0.015011	0.634743	-0.74889	-0.871911	-0.577494	1.33576	0.69486	-0.318198	-0.749428	-0.604031	-0.745779	1.51721	1.88208	2.7009
107875378	1.46388	0.818549	0.967042	1.21408	0.855544	1.21432	0.474612	0.720035	0.172671	1.38309	-1.18157	0.273522	-0.117808	-0.354933	-0.0157377	-0.228752	-1.21303	-0.756087	-0.864865	-0.574434	0.575059	-1.54613	-1.67925	-1.5998
107867519	-1.0923	-1.05877	-0.881737	-0.72883	-0.720939	-0.802879	-0.767975	-1.00441	-0.711657	-0.0452695	0.0244217	0.504723	-0.564562	-0.766964	-0.362614	0.660861	0.26278	1.74319	1.68156	0.71274	-0.519254	2.28514	1.32453	0.828207
107839135	-0.813246	0.219069	-0.603223	-0.921709	0.0431073	-0.162448	-0.644879	-0.0249751	-1.35732	-1.59984	0.514734	-1.79424	-0.344914	0.215353	0.260574	1.29724	1.50883	1.04542	-0.99326	0.653707	0.175534	0.464311	0.507895	2.35428
107864556	-1.04172	-0.712738	-0.910694	-0.693965	-1.16422	-0.790863	-0.964504	-0.960499	-0.900727	-0.98471	1.69595	-0.0436773	0.35874	0.263395	-0.97879	-0.000941325	2.17939	1.14939	0.985224	1.07055	-0.124297	0.711241	1.00375	0.854704
107844187	-0.896292	-0.899072	-0.972348	-0.619203	-0.549086	-0.672279	-0.876275	-0.734157	-0.807888	-0.47937	0.319974	-0.233435	-0.406966	-0.384415	-0.429811	0.176434	1.75527	0.186036	0.444778	0.140205	-0.296354	1.91009	2.08462	2.23955
107878821	-1.02935	-0.902909	-1.09784	0.186407	0.409277	0.0511313	-1.07397	-0.937295	-0.94907	-0.629398	1.17441	0.333076	-0.93157	-0.814711	-0.690793	1.31766	1.55975	0.243182	0.235639	-0.68162	-0.581076	1.35975	1.68248	1.76683
107840858	-0.903657	-0.955763	-0.923283	-0.772487	-0.780612	-0.770707	-0.788607	-0.829437	-0.807564	-0.383082	1.23853	0.137774	-0.515431	-0.522427	-0.453624	1.33051	0.824792	0.66355	0.247447	-0.012726	-0.70035	1.76774	1.92387	1.98555
107852273	-0.424104	1.25619	0.733449	1.18413	1.45253	0.544998	0.232761	0.500371	0.128365	0.0814324	-1.12964	-1.46481	2.13997	1.27216	-0.872764	-1.27091	0.377449	-0.103478	-0.39254	-0.461717	-0.982769	-1.28749	-0.381591	-1.132
107862218	-1.03883	-1.00483	-1.08582	-0.339247	-0.30984	-0.329076	-0.6916	-0.659154	-0.506537	0.267026	-0.70787	-0.78259	-0.179405	-0.177963	-0.378993	-0.271126	0.585837	-0.0297073	0.00227923	0.579141	0.186282	1.82906	2.48921	2.55377
107851256	-0.454055	-0.458876	-0.482917	-0.441116	-0.403289	-0.454226	-0.480929	-0.432393	-0.448727	-0.475065	-0.334581	-0.465879	-0.446293	-0.432325	-0.396252	-0.0846325	0.281225	-0.257368	-0.328771	-0.280955	-0.380878	2.40097	2.636	2.62134
107839516	0.966999	1.07626	1.44693	0.347359	0.835974	-0.0137257	-0.371889	-0.263016	-0.493139	-0.704792	-0.690236	-1.22735	-1.10357	-0.868876	-0.26809	-1.02719	0.508995	0.148731	-1.11316	-0.924581	-1.15161	1.21217	1.7177	1.96012
107855871	-0.163699	0.711232	0.256874	-0.218978	-0.904403	-2.07568	0.046945	-0.67623	0.0812557	-0.135489	-0.622812	0.0911773	-0.654779	-0.387999	-0.53661	0.0421063	0.464859	1.00196	0.598207	-1.07107	-1.44312	1.99541	1.48022	2.12061
107870255	-1.06327	-0.94144	-0.979209	-0.153764	-0.201962	-0.333285	-0.641771	-0.15971	-0.296822	0.179121	-1.22195	-0.310062	-0.313381	-0.294519	-0.125246	-0.173518	0.0207836	-0.236882	0.307203	0.30602	-0.422112	2.09232	2.0618	2.90166
107858532	-1.23373	-1.09926	-1.19013	0.519517	0.291328	0.170951	-1.30214	-0.932352	-1.38241	-0.33412	1.72345	1.10509	-0.818417	-0.470179	-0.481781	1.26477	1.40542	0.313441	0.207296	-0.378972	-0.796075	0.846349	1.12811	1.44387
107862406	-0.723242	-0.702103	-0.701832	-0.631593	-0.592501	-0.626234	-0.710109	-0.666391	-0.689218	-0.481399	0.479264	-0.342288	-0.557758	-0.456959	1.014	-0.351396	1.33416	-0.261458	-0.230532	-0.256249	-0.166594	1.17069	2.41611	2.73363
novel.6978	-0.91626	-0.925403	-0.934043	-0.486501	-0.463201	-0.498538	-0.87957	-0.734247	-0.786744	-0.207433	0.747096	-0.0219991	-0.258912	-0.307403	-0.561766	-0.336685	0.818137	-0.345103	0.773006	0.401267	-0.687431	2.09822	2.26073	2.25278
107854303	-0.762625	-0.753655	-0.811762	-0.224432	-0.186139	-0.252732	-0.626263	-0.711282	-0.555019	-0.150987	0.522378	0.365919	-0.70578	-0.754342	-0.59801	0.0185887	1.8164	0.589668	-0.615674	-0.819344	-0.814777	1.64017	1.81044	2.57926
107870273	0.0388504	0.867342	-0.0184317	-0.524513	-0.32913	-0.26767	1.00045	0.742857	0.508256	-0.91616	0.34805	-0.0205784	1.12401	1.81669	-0.419449	-0.349104	-0.301006	-0.178581	1.68649	0.637427	0.20156	-1.80121	-1.69638	-2.14977
107862319	-0.758887	-0.747278	-0.647568	0.904358	0.290204	0.508205	-0.596868	-0.840458	-0.74234	0.777681	-0.608171	-0.154425	-0.834418	-0.851885	-0.768399	-0.0387822	1.04089	0.819788	-0.823121	-0.638149	-0.945876	0.98612	2.1751	2.49428
107871861	0.355298	1.53805	0.39811	-0.651734	0.0749482	-0.75944	-1.83484	1.11145	-0.919214	-0.757056	0.134024	-1.35224	0.0515479	-0.0150782	-0.48119	0.0062369	0.379157	-0.0109817	-1.72837	-0.810319	1.04407	1.29221	1.02856	1.90681
107842937	-1.13874	-0.935639	-1.39974	0.202037	0.295992	0.301968	-1.2885	-0.335975	-0.992535	0.337089	-0.348022	0.500741	-0.65467	-0.471025	-0.594792	1.81953	0.382104	-0.246533	-0.514997	-0.563203	0.0929663	1.90503	1.74196	1.90496
107855038	-0.175134	1.34473	0.124524	0.525711	0.974142	-0.537461	0.239503	0.952117	0.0688533	-0.983079	1.39633	-1.07445	0.691591	0.574146	0.0069829	-0.36814	-0.840327	2.10906	0.0295588	-0.635478	0.436903	-1.51789	-1.74032	-1.60187
107846652	-1.02221	-0.940044	-1.1904	0.80785	0.916544	0.783463	-1.09303	-0.928578	-0.946163	0.765447	-0.023694	0.213419	-0.61605	-0.697968	-0.912856	0.705077	0.764912	-0.0543683	-0.783866	-0.472015	-0.671365	1.5742	1.6766	2.1451
107875525	-1.1607	-0.697243	-1.50158	0.250075	1.33679	0.283096	-0.946987	0.278066	-0.720905	-1.34771	-0.444864	-0.139557	0.34503	0.50738	-0.902308	1.11318	-0.871996	-0.626094	0.133004	0.205036	-0.320812	1.2755	2.34249	1.61112
107850573	-1.25705	-0.888568	-1.16354	0.957057	1.05525	0.636037	-1.07691	0.0372688	-0.531819	0.312551	-0.847666	-0.628704	-0.0764937	-0.516014	-0.746054	0.413307	-0.442671	-0.0665438	-0.527169	-0.341107	-0.391105	1.86739	2.24848	1.97409
107863104	-0.76046	-0.807953	-0.659877	-0.775461	-0.954773	-0.411825	-0.656887	-0.942548	-0.870088	1.24404	0.119952	0.128519	-0.481505	-0.291917	-0.478817	-0.140939	1.02302	0.0490528	-0.353126	0.151751	-0.557652	1.96538	2.00342	2.4587
107847426	0.00556672	0.0845363	-0.288345	0.560052	0.602412	0.790615	-0.885677	-0.279131	-0.66898	0.79632	-2.20434	-0.882296	-0.454276	-0.653497	0.568792	0.0987946	-0.462644	-1.24523	-0.658587	-0.0993481	-0.352532	1.79896	1.63071	2.19812
107871200	-0.681787	-0.706607	-0.687649	-1.16524	-1.135	-1.18928	-0.397123	-0.57645	-0.457739	-0.148569	-0.29802	0.109954	-0.250252	-0.191197	0.990677	0.851673	1.98214	0.78759	-0.754804	-0.528809	-0.727503	1.60127	1.79379	1.77893
107860573	-1.03355	-1.00274	-1.06111	-0.793584	-0.740271	-0.781725	-0.802063	-0.750845	-0.806391	0.134522	0.424799	0.916823	-0.565842	-0.460754	-0.432712	0.259751	1.89968	1.43175	0.168899	-0.171017	-0.68117	1.23708	1.58254	2.02794
107839423	-1.00394	-1.03875	-1.01981	-0.629614	-0.455777	-0.605018	-0.697601	-0.808865	-0.681277	-0.471965	0.72043	0.575641	-0.645866	-0.696227	-0.413099	0.129928	1.41202	1.36737	0.204653	0.0451601	-0.84095	1.56462	1.75279	2.23615
107879269	-0.980716	-0.873646	-1.37593	-0.00138141	0.741299	0.671989	-1.0492	-0.723429	-0.691347	0.517109	-0.976504	-0.525745	-0.116527	-0.438077	-0.144383	0.551264	0.290038	0.741844	-0.391707	-0.818121	-0.502911	1.71359	2.21668	2.16581
107847560	-1.17684	-1.01173	-1.28303	-0.0427277	0.147874	-0.152842	-0.96627	-0.674494	-0.599671	0.0330609	-0.154629	-0.227886	-0.72499	-0.662514	-0.608288	0.229413	1.5049	0.753195	0.220317	-0.182777	-0.499921	1.66621	2.2596	2.15405
107845922	-0.461708	0.368465	0.340342	1.31614	1.31531	0.515707	0.137278	1.65203	-0.228894	-0.412945	-0.189965	-1.27494	2.02026	0.967129	-0.457248	-0.576864	-0.204323	-0.679109	0.224503	0.146129	0.332253	-1.76801	-1.70958	-1.37195
107843684	-0.703308	-0.630304	-0.670947	-0.519421	-0.468339	-0.682164	-0.401792	-0.336114	-0.285694	-0.645857	0.0316351	-0.460403	-0.783389	-0.757363	-0.155122	0.703824	1.30613	1.50969	-0.605896	-0.713731	-0.754504	1.70271	1.74326	2.5771
107870183	-0.754819	-0.623802	-1.06078	-0.560847	-0.224137	-0.324604	-0.809508	-0.503354	-1.02876	-0.576306	-0.305935	-0.868026	0.0228812	-0.120516	-0.354975	0.677625	0.88259	-0.687651	0.382037	0.334801	-0.204588	2.08109	2.07994	2.54764
novel.4601	-0.7522	-0.75708	-0.763029	-0.755296	-0.719061	-0.735302	-0.691176	-0.681143	-0.701267	-0.347926	-0.193435	0.11832	-0.0704668	-0.210211	-0.470685	0.662212	0.802257	2.0324	-0.588347	-0.219914	-0.676099	1.53088	2.64206	1.54451
107858443	0.104939	-0.293559	0.235632	0.210313	0.695478	0.688515	0.239851	-0.304968	-0.0572227	0.979198	-1.09831	-0.775107	-0.750048	-1.19806	-1.08462	0.210442	-0.446926	-0.564672	-1.53774	-0.61159	-0.638181	1.8879	2.19117	1.91757
107843850	1.05687	0.842042	1.11953	0.658101	0.774153	0.633779	0.698247	0.422151	1.07445	0.867032	-1.842	-0.645388	0.0851453	-0.168825	0.308631	-0.521594	-1.04937	-0.914789	0.421991	0.302969	0.9023	-1.64932	-1.32698	-2.04913
107853014	-0.490055	-0.520325	-0.519733	-0.520388	-0.514447	-0.529401	-0.510092	-0.414761	-0.468842	-0.450313	-0.391739	-0.352838	-0.324786	-0.395484	-0.215213	-0.381507	0.571775	-0.338788	-0.285761	-0.0669791	-0.393052	2.06579	2.85065	2.59629
107870220	1.8498	1.12313	1.29259	0.219714	0.267145	0.64833	0.508084	0.741486	0.606724	0.110092	-2.32187	-0.834988	0.30303	0.26193	0.644965	-0.720465	-1.62079	-1.36781	-0.368291	0.462404	0.778894	-0.865003	-1.0242	-0.694892
107871274	-1.0547	-1.09752	-0.956863	-0.857576	-0.779614	-0.76431	-0.822658	-1.01004	-0.801406	0.104302	-0.890092	0.216668	-0.122438	0.0849251	-0.0641688	0.832281	1.71189	1.45314	0.091085	0.256788	-0.517202	1.36796	2.06074	1.55881
107839179	0.525986	1.05512	-0.568989	-0.658951	-0.485824	-0.806396	0.16495	0.538464	-0.336702	-1.52955	0.203676	0.454059	-1.00286	-0.73088	0.899065	2.19895	-0.943447	-1.41304	-0.00309947	-0.925849	0.376383	-0.0411452	0.713032	2.31706
107838951	0.536584	-0.129889	-0.293925	0.432251	0.319587	0.544906	-0.818615	-0.68618	-0.271962	-0.128919	-1.61645	-1.18593	-0.624822	-0.599667	-0.254572	0.0537491	-0.348388	-0.35798	-0.840226	-0.297639	-0.104577	2.18524	2.0771	2.41032
107840379	-0.731832	-1.14108	-1.29114	0.0157904	0.238685	-0.197106	-1.24484	-0.482134	-0.497057	0.698145	-1.64132	-0.98017	-0.425929	-0.293603	0.062131	0.535906	0.39705	0.379886	0.00457429	0.318196	0.22291	2.01264	1.97681	2.06348
107859437	-1.00987	-0.87292	-0.967519	-0.37027	-0.0548324	-0.448677	-0.921341	-0.542315	-0.628382	-0.534581	-0.39023	-0.545383	-0.383811	-0.313962	-0.370405	-0.116376	0.896594	0.0811668	0.859855	0.256907	-0.393614	1.89436	2.32467	2.55093
107839887	-0.314894	-0.22454	-0.489485	-0.172719	0.217162	-0.29571	-0.492821	-0.125208	-0.381295	-0.603519	-1.00992	-0.7664	-0.76925	-0.703587	-0.146229	0.14722	-0.0529067	0.333176	-0.387641	-0.560073	-0.473286	2.23548	2.03914	2.9973
107845026	-0.192956	0.348421	-0.0917352	-0.269841	-0.823339	-0.14696	0.0993009	0.206394	0.992283	-1.32435	1.81325	0.100042	0.174182	1.62399	0.723307	-0.823288	1.4636	0.521018	-0.124218	0.146381	0.751655	-1.7849	-1.38935	-1.99287
107866080	-0.900885	-0.62333	-0.0598393	-0.45068	-0.523101	-0.288779	-0.641548	-0.678741	-0.644938	-0.661246	0.112329	0.0735581	-0.547962	-0.33393	0.142885	-0.322368	-0.47157	-0.0595926	0.415103	0.936153	-1.30442	2.59282	2.48646	1.75363
107850639	-0.183352	-0.932834	-0.89661	0.876953	1.16169	0.872223	-0.672717	-0.295946	-1.11381	0.364369	-1.18929	0.257918	-1.17347	-0.251424	-0.566071	1.14487	0.855901	-0.59246	-0.335091	-1.67383	-0.071714	1.22908	0.768257	2.41735
107857036	-1.26228	-0.739349	-1.45326	0.405302	-0.440773	-0.742735	-1.36239	-0.728539	-0.865772	-0.149912	0.981568	-0.838654	0.513336	-0.0979619	-0.947979	0.387263	2.2145	1.97082	0.297956	0.727521	-0.0985272	1.23283	0.85735	0.139683
107858557	-0.250582	-0.241549	-0.289667	-0.361004	-0.0886573	-0.521441	-0.444784	-0.421994	-0.414622	-0.633936	-0.256006	-0.496469	-0.563232	-0.527389	-0.0710092	0.265327	-0.275013	0.0300649	-0.597822	-0.569937	-0.564488	1.8551	3.47506	1.96404
107851992	-0.980123	-0.584392	-1.06241	0.0708011	0.624834	-0.562598	-0.986172	-0.331421	-0.997325	-0.118105	-0.185808	-0.76274	-0.373491	-0.461577	-0.868734	0.841504	0.307744	1.29346	0.0286014	-0.57843	-0.519747	2.28922	2.11598	1.80092
107848473	-0.837798	-0.792083	-0.763404	-0.0980859	0.355477	-0.0781048	-0.8286	-0.768888	-0.814868	-0.21496	1.91964	0.0517137	-0.761238	-0.789995	-0.801739	0.249849	1.44233	0.822592	-0.851978	-0.695535	-0.824996	1.44923	1.71524	1.91619
107877852	-0.810865	-0.792243	-0.169559	0.0260443	-0.641726	0.0952034	1.71328	-0.857937	-0.720101	0.412979	1.01903	0.210545	0.426083	1.09499	0.374013	-1.03174	2.32882	-0.656327	0.691543	1.28525	-0.18356	-1.50525	-0.774701	-1.53378
107841774	-0.746277	-0.803402	-0.81167	-0.648252	-0.603595	-0.688754	-0.531069	-0.666057	-0.387481	-0.470007	-0.24686	-0.264292	-0.529912	-0.594602	-0.460864	-0.207376	1.94569	0.831368	-0.67548	0.853624	-0.179994	1.39464	2.10296	2.38766
107848391	-0.159428	-0.310846	-0.390037	-0.040863	-0.214621	-0.0485615	-0.643532	-0.501719	-0.541822	-0.171009	-0.43379	-0.111395	-0.656378	-0.663281	-0.573299	-0.156474	0.664799	-0.563402	-0.637702	-0.571572	-0.655914	2.79515	2.21403	2.37166
107878072	-1.10699	-0.940171	-0.961497	0.641569	1.3831	-0.104225	-0.730785	0.382454	-0.10628	-0.624647	-0.804843	-1.20891	-0.677354	-0.76607	-0.502894	0.910322	-0.201714	0.972192	-0.10873	-0.764191	-0.324978	1.90084	1.91611	1.8277
107844777	1.01246	1.30414	1.11755	-1.5687	-1.41353	-1.31649	0.83332	1.22153	0.0771089	-0.313205	1.99639	-0.198131	0.086804	-0.299524	1.22374	-0.722565	0.154807	-0.291015	0.467361	-0.632767	0.473771	-1.05617	-1.01785	-1.13904
107850926	-1.21725	-0.134457	-1.00002	-0.381463	-0.898932	-0.40451	-0.687148	0.884183	-0.594799	0.262112	-0.750268	0.995439	-0.0154923	0.615676	-0.37604	-1.06337	0.0485058	1.49241	0.87669	-0.908645	-0.607706	1.03219	-0.20066	3.03355
107844641	0.104384	0.100082	0.151059	-0.129608	-0.882474	0.712364	0.793136	0.0605354	0.705675	1.91302	-1.83039	0.661192	0.115422	0.841904	0.530849	-0.906967	-0.416858	-1.62636	0.326486	1.56699	1.00245	-1.32678	-1.05709	-1.40902
107865068	-1.16873	-1.35048	-1.34473	-0.569351	-0.350502	-0.272512	-0.831339	-0.960946	-0.977545	-0.531904	0.527772	0.259328	-0.486147	-0.197749	-0.207205	1.11137	1.76133	0.207246	0.97463	0.168103	-0.600155	1.25401	1.44328	2.14223
107840322	-0.870167	-0.914046	-0.924242	-0.507596	-0.440991	-0.375037	-0.737296	-0.875291	-0.725119	-0.0291736	0.539436	0.00698705	-0.726758	-0.42057	-0.601675	0.167617	1.44895	0.811567	-0.273908	-0.218619	-0.668127	2.12571	2.2396	1.96875
novel.6550	0.0313129	0.0793092	-0.034355	0.326834	-0.4568	0.517455	-0.115202	-0.179643	0.828519	-0.722812	-0.979274	2.60639	0.251547	2.33692	1.01885	-0.684779	-0.405968	0.678177	-0.0989019	-0.263814	-1.06678	-1.06019	-1.24691	-1.35988
107870283	-0.865384	-0.828816	-1.07771	0.324944	0.442526	0.140488	-0.889785	-0.560175	-0.564208	0.329182	-0.807538	0.189905	-0.455047	-0.595439	-0.0325273	-0.0641368	0.345736	-0.39551	-0.806837	-0.2745	-0.397492	1.90893	2.06614	2.86725
107839834	1.52577	0.0671805	0.84275	-0.492831	-0.610383	-0.800079	0.052522	-0.760451	-0.766053	0.411826	-1.62916	-1.69335	0.180813	-0.65774	-0.0808687	-0.420227	1.27707	1.02574	-1.61031	1.09364	-0.485759	0.850223	1.0459	1.63379
107851341	-0.288287	2.09627	1.53136	-0.695333	-0.547084	0.46301	-1.01369	0.757699	0.137256	-1.32778	1.7531	0.508034	0.792338	0.105311	-1.64183	-0.230085	-0.806135	0.317273	-0.0863498	-0.584327	1.3285	-0.897366	-0.762715	-0.909175
107851274	0.321889	0.522841	0.287225	1.08296	0.819732	-0.522357	1.13187	-0.12106	0.64442	-1.78443	-0.840433	0.673578	0.132729	0.726509	0.514979	0.0880057	-0.176231	1.0172	0.85622	-0.455879	0.691586	-1.29064	-1.98115	-2.33956
107867201	-0.485773	-0.547029	-0.526548	-0.304426	-0.0649215	-0.295822	-0.519605	-0.635597	-0.553627	-0.256035	-0.0187172	-0.23963	-0.71116	-0.669532	-0.463926	0.103702	0.352129	0.352843	-0.508145	-0.648544	-0.702856	2.0213	2.50135	2.82056
107858654	-0.516263	-0.663192	-0.644631	-0.639453	-0.640568	-0.5818	-0.409966	-0.358372	-0.321756	-0.420182	-0.419177	0.0196214	-0.23825	-0.223284	0.49407	-0.283979	-0.0706173	-0.254832	-0.399084	-0.0756536	-0.337054	1.09201	3.50971	2.3827
107852579	0.0543779	-0.251067	-0.552658	0.0215869	0.24803	0.288104	-0.51737	-0.795833	-0.775674	0.433384	-0.280511	-0.180245	-1.85655	-1.47973	0.685935	0.843448	0.444489	0.428194	-0.873023	-1.62986	0.385872	1.73813	2.2218	1.39918
107845562	-0.651737	-1.3317	-0.666007	-0.175957	-0.0276868	0.382956	-0.222359	-1.33958	-0.906491	1.26565	0.214492	1.56985	-0.969858	-0.981678	-0.542099	0.734047	1.49802	-0.480834	-0.242226	-0.279856	-1.18149	1.42116	1.01334	1.90005
107866789	0.119978	-0.417637	-0.263234	-0.0249066	-0.544075	0.292172	-0.442057	-0.770589	-0.716231	0.41857	-1.3928	0.229158	-1.02174	-1.07958	-0.424017	0.210689	0.231061	-0.46578	-0.534031	0.079136	-0.333164	2.21338	2.05344	2.58225
107856531	-0.645566	-0.637137	-0.661691	-0.392992	-0.20408	-0.406245	-0.547381	-0.560067	-0.616447	-0.180214	-0.17886	-0.444611	-0.386681	-0.41682	-0.29012	-0.131386	0.310161	0.249168	-0.496505	-0.0914238	-0.551591	2.57524	1.55286	3.15239
107858917	1.28929	1.15956	0.462566	0.747735	0.564067	0.951321	0.57683	1.3114	0.685374	-0.224321	-1.68796	-0.784234	0.444556	0.546989	0.542597	-0.899729	-0.996607	-1.08136	-0.415292	-0.227776	1.3382	-1.35672	-1.46805	-1.47844
107878272	-0.866071	-0.539167	-0.847346	0.220931	0.146134	0.175381	-1.06946	-0.541521	-0.601057	-0.00951667	-1.58381	-0.786377	-0.19065	-0.320762	-0.133796	-0.11083	-0.172764	-0.506939	0.423548	0.65268	-0.00467463	1.97315	1.99407	2.69885
107859688	-0.2509	-0.171329	-0.178992	-1.00365	-0.0973056	-1.20974	0.448111	1.6566	0.388569	-0.575272	-0.747378	-1.59452	-0.0777763	-0.054261	0.517591	-0.488178	2.19318	-0.651717	-1.4189	-0.565569	-0.168971	0.953046	1.70755	1.38982
107862524	1.29388	0.529192	0.345142	0.742324	1.16371	0.449978	0.417058	0.736197	0.0879755	1.01151	-1.26216	-1.90524	1.67239	0.475264	-0.296992	-1.35932	-1.78454	-0.0777925	-0.184974	0.970409	-0.302026	-1.09166	-0.578567	-1.05178
107851698	0.283183	1.18995	0.31988	-1.16985	-0.605973	-0.418083	0.52025	0.115009	0.0244868	-1.1585	2.46052	0.328821	0.1129	0.35442	-0.204494	0.107884	0.0482851	-0.136398	0.393845	0.0779562	2.00257	-1.29226	-1.7819	-1.5725
107846193	-0.877969	-0.518699	-0.878892	0.0646268	-0.161342	-0.573832	-1.05102	-0.2909	-1.15945	-0.648008	0.415009	-1.02159	-0.0944985	0.0285253	-0.208901	-0.366964	0.914242	0.426628	0.0179398	-0.260898	-0.350693	1.49684	2.45835	2.6415
107853807	0.518882	0.861831	1.01824	0.515506	0.580142	0.616059	0.542437	1.10423	1.22598	-0.504856	-1.63182	-1.5612	0.216757	0.647831	1.00036	-1.33274	-1.50777	-0.659708	-0.239157	0.315538	1.44831	-1.05851	-0.933131	-1.18321
107856203	-0.888028	-0.712721	-0.666531	0.708898	1.38234	1.04702	-0.980354	0.206557	-0.817142	0.531277	-1.24575	-0.667872	-0.632098	-0.272576	-1.54954	-0.00926552	-0.222912	0.111784	-0.881601	0.0407649	0.0875351	1.45764	2.15759	1.81499
107860592	0.165177	1.23953	0.579701	-0.601522	0.363607	-0.641179	0.360904	1.9203	0.358382	0.225942	-0.548278	0.000397322	1.10384	-0.050277	-0.0741794	-0.844669	0.154673	1.82274	0.043998	-0.173806	-0.0245575	-2.15872	-1.00793	-2.21408
107839679	1.22542	0.357425	0.792042	-0.994475	-1.23709	-0.980501	0.640603	0.165271	1.15317	-1.35564	2.20009	0.132449	0.735849	0.495496	0.670861	-0.027181	-0.967189	-0.105445	0.608827	0.0151843	0.570108	-0.936495	-1.74229	-1.4165
107860025	-1.15844	-0.812271	-1.16425	0.124155	0.464739	-0.260985	-0.691653	-0.0879292	-0.602442	-0.0226525	-1.4532	-1.01437	0.0545632	-0.213773	-0.690629	0.0386437	0.514109	0.882157	0.89471	-0.307054	-0.555832	1.59681	2.06102	2.40457
107855061	-0.555102	-0.473403	-0.557374	-0.552605	-0.492088	-0.569195	-0.495993	-0.4542	-0.49969	-0.427153	-0.482811	-0.25194	-0.524268	-0.500924	-0.295903	-0.175978	0.279734	0.296449	-0.295444	-0.0936817	-0.361918	2.17746	2.30034	3.00569
107852493	0.280517	-0.332617	0.798371	-1.02065	0.276322	-0.93364	1.24614	0.438392	0.37898	-1.8089	0.724211	-0.821422	1.40459	1.09328	0.372139	-0.294948	1.35971	-0.324838	1.18488	0.476217	-0.215549	-0.948085	-1.2514	-2.0817
107847466	-0.858261	-0.23247	-0.727682	-0.681302	-0.305386	-0.607628	-0.919032	-0.413473	-1.01156	-0.608659	0.303138	-0.953824	-0.217909	-0.0782925	-0.555136	-0.552843	1.03997	0.233894	0.4	0.249412	-0.12641	1.57563	2.32713	2.7207
107860327	0.563308	0.99716	1.02293	0.482655	1.13896	0.527055	0.567472	1.19461	0.315493	-0.710572	0.264669	-0.903551	0.404073	0.241241	-0.419905	-0.912778	-2.25208	0.369064	0.254668	0.261644	1.19875	-1.45389	-1.07224	-2.07873
107875409	0.395907	-0.116236	-0.146965	0.177926	0.489923	-0.0229826	-0.431395	-0.610902	-0.0237588	0.113586	-2.30037	-0.859706	-0.365568	-0.595497	-0.446522	1.06261	-0.581143	1.23674	-0.960719	-0.0538688	-1.18404	1.64149	1.15337	2.42812
107839530	-0.653711	-0.682875	-0.776243	-0.693739	-0.554584	-0.714144	-0.588894	-0.405709	-0.55135	-0.546158	0.372219	-0.34321	-0.51458	-0.394963	-0.322586	-0.262444	0.328241	0.850362	-0.0416261	-0.250236	-0.346256	2.04838	2.91495	2.12916
107867064	-0.277215	1.22762	-0.0930128	0.493905	-0.388699	0.38613	0.601562	0.2376	1.03599	0.420719	0.0675678	0.707192	0.698391	0.366323	0.0948676	-1.27909	-0.872463	-1.07071	1.66351	1.21986	0.281671	-1.93261	-1.74513	-1.84399
107865843	0.979866	1.10511	0.234875	-0.811116	-0.902165	-0.692641	-0.167515	-0.415998	-0.547629	0.114009	0.308204	-0.4409	-0.998164	-1.05695	-0.0329679	-0.670693	-0.43599	0.424506	-0.694902	-0.799912	-0.689547	1.48636	2.03447	2.66968
107859841	0.105241	0.489609	-0.0648021	-0.0322089	-0.640802	-0.155026	0.285018	-0.339297	-0.921827	-0.750352	2.67258	0.105813	1.51206	0.579622	-0.516474	0.158837	0.631681	0.291808	-0.623241	0.942928	0.98948	-1.36011	-1.23605	-2.12449
107863944	-1.14002	-1.06496	-0.991347	1.13144	1.05316	0.972491	-1.07404	-0.657567	-0.929377	0.722316	-0.716721	-0.0522745	-0.649019	-0.720849	-0.636137	0.88129	0.12061	0.424859	-0.58666	-0.557454	-0.768581	1.62139	1.69516	1.92229
107857199	-0.956681	-0.853068	-0.963742	-1.01054	-0.808388	-0.914138	-0.89274	-0.749359	-0.778466	-0.700266	0.768124	-0.352571	-0.160041	0.282189	0.0597901	-0.0660747	0.689415	0.727625	2.75074	0.411889	-0.564229	1.2773	1.49012	1.31311
107866444	-0.648014	-0.651584	-0.645428	-0.491427	-0.432211	-0.550026	-0.64433	-0.605809	-0.598095	-0.171724	-0.00340931	-0.239253	-0.57625	-0.561398	-0.567158	0.171676	1.48833	0.565188	-0.464676	-0.545784	-0.594165	1.97161	2.35486	2.43907
107854574	0.0926062	-0.472295	0.588338	-1.25304	-0.667337	-0.645629	1.03899	0.339758	0.517086	-0.89609	1.19263	0.545647	0.840915	0.70158	0.446275	0.625815	0.500646	0.992659	0.380576	0.448347	0.653988	-1.86792	-1.66698	-2.43657
107873225	-0.373609	-0.274398	-0.297174	1.17525	1.90349	0.769849	-0.825541	-0.2754	-0.567634	0.731993	-1.59138	-1.40396	-0.112926	-0.497355	-0.612084	-0.611854	-0.643993	-0.176877	-0.645394	0.311175	-0.861697	1.25165	1.56662	2.06125
107861902	0.268732	-0.169346	-0.332956	0.404166	0.72347	0.839232	-0.188364	0.300892	-0.490823	0.794921	-2.203	-1.14299	0.232637	-0.157242	-0.756691	-0.648047	-0.30597	-0.542207	-1.03685	-0.167062	-0.927454	1.39687	1.59187	2.5162
107878901	-1.19323	-1.26137	-0.96618	0.625913	0.486761	1.1489	-0.902576	0.134394	-0.534811	-0.240228	-1.0744	-0.404862	-0.459852	-0.276525	-0.336167	0.0844492	-1.34828	1.28483	0.969711	-0.308465	-0.637259	1.95359	1.33303	1.92263
107878726	-0.769962	-0.850931	-0.839444	-0.281991	-0.273615	-0.288479	-0.794858	-0.302077	-0.516991	-0.412732	-0.472517	-0.826017	-0.324325	-0.431599	0.130529	-0.052006	0.130244	0.150854	-0.0545962	0.15101	-0.323203	2.04839	2.12518	3.07914
107861849	0.837119	0.547254	0.393011	0.363243	0.254734	0.861028	0.464329	2.1286	1.02311	0.0819353	-1.00866	-0.324219	1.24949	0.667183	-0.313986	-0.830737	-1.22843	-0.49242	-0.56607	0.279766	0.684136	-1.69161	-1.71677	-1.66204
107863351	-0.665766	-0.833475	-0.895805	-0.364392	-0.18892	-0.64098	-0.29044	-0.711462	-0.462203	0.633055	0.982596	0.682623	-0.95436	-0.774746	2.00701	-1.37558	1.74034	-0.597545	-0.261065	-0.704596	-0.407162	0.834591	1.22158	2.0267
107845715	-1.13795	-0.718934	-0.992758	-0.236762	0.168248	0.116516	-0.981289	-0.712049	-1.30529	-0.512173	0.308447	-0.295846	-0.00872855	-0.0618021	-1.03217	-0.0355611	-0.22325	1.14187	0.342756	-0.018369	-0.14849	1.74892	1.90508	2.68958
107864045	-1.07272	-1.11389	-1.14886	0.816791	1.36913	1.12321	-1.07904	-0.298752	-0.672637	0.962256	-0.18844	-0.923256	-0.521514	-0.630053	-0.703991	-0.271586	-0.345241	0.548645	-0.626321	0.0212565	-0.538248	1.33069	1.94337	2.0192
107840517	-0.673094	-0.641626	-0.674979	0.117825	0.289906	0.180133	-0.725441	-0.103095	-0.371737	0.903206	-1.19372	-0.859694	-0.545708	-0.604444	-0.406618	0.00771512	-0.337919	-0.357842	-0.583443	-0.260777	-0.161463	2.18799	2.47995	2.33488
107859783	-0.231422	-0.296284	-0.560841	-0.280424	-0.740134	-0.733393	0.103643	0.770197	0.286416	-1.36659	1.52767	-0.00848714	1.43866	1.20965	0.883662	-0.192985	-0.0644003	0.753822	1.797	-0.335048	0.79654	-1.40594	-1.69428	-1.65702
107861815	-0.657303	-1.36026	-0.869484	-1.2932	-0.929476	-0.598214	-0.561323	-1.06213	-0.798587	-0.36605	-0.578315	1.2183	-0.166919	-0.208127	0.393658	-0.0549293	1.90743	0.196253	1.42667	0.523345	-0.548179	1.22674	1.47989	1.68022
107849791	-0.146	-0.455459	-0.440899	-0.0429496	-0.456106	0.358473	0.578874	-0.788106	-0.370797	2.32809	-2.44288	0.0288471	-0.594619	-0.85757	-0.0447678	0.252442	-0.468396	-0.39858	-0.253981	-0.334515	-0.242063	1.14769	1.9527	1.69057
107860317	-0.725747	-0.699171	-0.797429	-0.149393	0.084246	-0.0687383	-0.497489	-0.321544	-0.69051	0.113741	-0.975226	-0.634547	-0.514275	-0.729943	0.101946	-0.213523	0.783905	-0.640248	-0.325231	-0.10095	-0.115171	2.16962	2.76951	2.17618
107868500	-0.913934	0.0328385	-0.923769	1.22024	1.24175	0.881223	0.431168	1.01461	0.184634	-1.57583	0.596739	-1.47548	0.310746	1.03342	0.582727	-0.489985	-0.0189409	0.13662	0.471139	-0.487471	1.83432	-1.2242	-1.26752	-1.59505
107860843	-0.686931	-0.703882	-0.692059	-0.671471	-0.651332	-0.690249	-0.602152	-0.516684	-0.505925	-0.53822	0.329632	-0.192065	-0.45669	-0.492796	0.205868	-0.127428	1.73637	-0.0333967	-0.416631	-0.32383	-0.566146	1.86195	2.57171	2.16235
107848552	-0.12931	-0.145415	-0.282225	0.561588	0.223214	0.417777	-0.749826	-0.373208	-0.341069	-1.00334	0.911887	-0.833554	-0.687516	-0.589022	0.0306971	0.147704	0.10995	-1.2925	-0.230315	-1.04045	-1.0416	2.70353	1.4055	2.22751
107867852	-0.981657	-0.93993	-0.90138	-0.550205	-0.521798	-0.781497	-0.744705	-0.679704	-0.759387	-0.390355	-0.162265	-0.495488	-0.0340072	-0.0770593	-0.375347	0.348322	0.878047	0.487482	-0.376253	0.683005	-0.358718	2.24662	2.32021	2.16607
107840007	0.762751	0.753125	0.30119	0.415203	0.378776	-0.0135607	1.18627	1.85777	0.794451	-0.60823	-0.794922	-1.67474	0.922112	-0.133675	0.0915108	-1.10101	-1.13335	0.262887	-0.325409	0.704317	1.52099	-1.41188	-1.33862	-1.41596
107839316	-0.669842	-0.854389	-0.913059	-0.284977	-0.133164	-0.352774	-0.678038	-0.465754	-0.515601	-0.0438407	-0.98881	-0.549198	-0.0990734	-0.25899	-0.438698	0.269186	0.613164	-0.117267	-0.528813	-0.00855867	-0.175872	2.05433	2.38562	2.75442
107863537	-0.478175	-0.670908	-0.497959	-0.907584	-0.942896	-0.941564	-0.300879	-0.666154	-0.024987	-0.528037	-0.656388	-0.220061	-0.614191	-0.430971	0.416728	-0.258994	2.47456	-0.228802	0.16292	-0.0426676	-0.226202	1.17235	2.30457	2.1063
107855193	0.977377	0.53027	0.0786983	0.596481	0.282833	1.05756	-0.609582	0.21329	0.334655	-0.617438	-0.0720658	-2.21382	-1.64449	-1.51664	-0.223665	-0.0841734	0.0799468	-1.56407	0.61652	-0.323028	0.160381	0.69364	1.0721	2.17522
107861750	-0.669678	-0.660468	-0.664414	-0.390525	-0.143438	-0.47025	-0.663711	-0.595094	-0.613028	-0.629376	0.445996	-0.584114	-0.302853	-0.310649	-0.348746	-0.219842	1.03242	0.334416	0.657255	-0.442901	-0.501998	1.51914	0.44703	3.77482
107859818	-0.230833	1.0768	0.160268	0.462693	1.67449	0.445685	0.29589	1.28997	0.373335	1.38168	0.399742	-1.68295	-0.0205421	1.07137	-0.760759	-1.4735	-0.860118	-0.127648	0.414254	0.171432	-1.28519	-1.28866	0.369605	-1.85702
107858766	-0.699126	-0.886878	-0.834579	-0.637809	-0.601621	-0.464586	-0.590506	-0.672214	-0.674882	0.0362094	-0.484694	-0.188756	-0.426279	-0.505597	-0.0121726	0.0928919	0.540551	-0.232828	0.17344	0.185757	-0.338694	2.10987	2.44801	2.6645
107875542	-0.794939	-0.895847	-0.859544	-0.690256	-0.759521	-0.630119	-0.562361	-0.772382	-0.596615	0.786192	-0.661532	1.25344	-0.557465	-0.483866	-0.404945	0.782033	0.638195	-0.383242	-0.43024	-0.0348493	-0.17784	2.45874	2.21255	1.56441
107875682	-0.843518	-0.59153	0.0471944	1.32215	0.185675	1.33223	0.38332	-0.521423	-0.344884	0.878561	0.951747	-1.24526	1.1862	1.0932	-1.01427	-0.535512	0.875925	0.654171	-0.346313	1.41584	-1.84501	-1.37032	-0.241547	-1.42661
107866351	0.517792	0.904861	1.4765	1.42191	0.910891	1.07533	-1.02727	-0.599055	0.108623	-1.15345	3.22501e-05	-0.686075	-0.301277	-1.28933	0.0961308	-1.26991	-0.990636	-1.2846	-0.318649	-0.382497	-1.09031	1.21289	1.22363	1.44447
107878182	0.366467	0.983792	0.251447	1.02242	0.954065	0.827865	-0.434788	0.817129	0.0524165	-0.670048	2.19626	-1.07269	0.0179147	0.261467	-0.107627	-0.895347	-0.518159	-0.806159	0.151091	-0.464238	1.6619	-1.68697	-1.32034	-1.58786
107859909	-0.614726	-0.555447	-0.778571	-0.335041	-0.380019	-0.550359	-0.385567	-0.2354	-0.405769	0.311625	-0.500417	0.271699	-0.6323	-0.659283	0.0472461	-0.219371	0.614982	-0.318726	-0.809257	-0.288371	-0.718757	1.82356	2.29092	3.02734
107856182	-0.273295	-0.757737	-0.736631	-0.440823	-0.530881	-0.145274	-0.812663	-0.480248	-0.580522	-0.689285	-0.161932	1.5891	-0.966245	-0.859429	-0.552626	1.75322	1.09341	0.563102	-0.819566	-0.628418	-0.61323	1.56926	1.22574	2.25497
107839867	-0.971782	-1.15735	-0.967086	-0.57313	-0.802549	-0.507254	-0.628373	-1.11026	-0.944044	0.0400116	2.14642	0.642693	-0.357806	-0.299218	-0.777707	0.933176	2.07188	1.06482	0.72978	-0.0758872	-0.824681	0.193337	0.720342	1.45467
107838888	-0.920928	-1.02864	-1.15214	-0.00125123	-0.378113	-0.38046	-0.899434	-0.671941	-1.02603	-0.532962	-0.111249	-0.0911218	-0.447688	-0.31233	-0.140214	0.158701	0.59203	0.00229557	0.54759	0.179493	-0.178644	1.85169	2.18246	2.75889
107848308	-0.340783	-0.43717	-0.470723	-0.762678	-0.697681	-0.600298	-0.146245	-0.508356	-0.323021	-0.604161	-0.0660248	0.11634	-0.70448	-0.429358	0.726629	-0.0142697	-0.278498	-0.562837	0.154479	-0.419211	-0.483335	0.973731	2.85065	3.0273
107859663	0.79358	0.571304	0.251057	-0.206467	0.389429	0.269127	0.297196	0.57973	-0.062304	-0.283307	-0.215543	0.608921	1.08378	1.10975	-0.122191	-0.315806	-1.30615	-0.89541	0.776469	0.640063	1.80778	-2.42137	-1.72961	-1.62002
107839127	-0.422371	-0.504451	-0.395331	-0.69805	-0.598106	-0.710439	-0.54387	-0.829633	-0.59981	-0.0935215	0.781978	1.17669	-0.548305	-0.48121	-0.254153	-0.265897	2.89099	0.134047	-0.481722	-0.936457	-1.01071	1.38754	1.27231	1.73048
107875491	-0.894703	-0.928136	-0.92686	-0.334165	-0.33102	-0.443098	-0.89824	-0.791261	-0.747527	-0.125915	0.103501	0.190312	-0.608128	-0.530739	-0.800347	0.304619	1.24411	1.24387	-0.0998706	-0.0709216	-0.693184	1.57767	2.01027	2.54977
107876357	-1.1793	-1.07475	-1.24046	-0.286744	-0.122583	-0.907946	-1.23946	-0.628343	-0.369192	0.671149	0.110729	0.225256	-0.707281	-0.600215	-0.334508	0.678155	1.58942	0.520943	-0.0344693	-0.704813	-0.00422168	2.0616	1.65193	1.9251
107859141	0.240165	-0.264817	0.0921018	0.419963	0.349513	0.764749	-0.182504	-1.19093	-0.57816	2.18795	-1.65458	0.131196	-0.849662	-1.01839	-0.624928	-0.235603	-0.166386	0.319878	-1.45539	-0.194493	-0.78192	1.66368	1.20123	1.82734
107864680	-1.24522	-1.56061	-1.10914	0.959912	1.01107	0.886644	-0.583782	-0.613579	-0.280645	1.72277	-1.80492	0.123483	-0.0805528	-0.435101	-0.41024	0.170989	-0.555292	0.282087	-0.832518	0.0526431	-0.0726374	1.27454	1.77892	1.32119
107859767	0.0935634	0.137681	-0.172745	-0.673472	-0.678441	-0.796032	-0.0529589	-0.373693	-0.114537	-0.682481	-0.754882	-0.821952	-0.463115	-0.402589	0.594915	-0.628869	-0.523038	-0.388771	-0.189117	-0.105085	-0.159081	1.72259	2.41263	3.01948
107847598	-0.962577	-1.17417	-1.39831	0.312471	0.285617	-0.189867	-0.921941	-0.454096	-0.490837	-0.660871	-0.337254	-0.323854	-0.410089	-0.648833	-0.463401	0.898071	0.530801	0.64316	0.0649342	-0.199312	-0.543687	1.92153	2.19969	2.32282
107878173	-0.652023	-0.546013	-0.60707	-0.424377	-0.319451	-0.518774	-0.627809	-0.297723	-0.431598	-0.60469	-0.518978	-0.448522	-0.382563	-0.430683	-0.365775	-0.100307	0.283162	0.0740689	-0.110652	-0.2547	-0.197992	2.13693	2.27266	3.07288
107870017	-0.47335	-0.823449	-0.602883	-0.563161	-0.844624	-0.20624	-0.163769	-1.22428	-0.307716	1.15082	-0.0713886	2.07349	-1.03194	-0.840289	-0.509142	0.578536	1.59081	0.418068	-0.725149	-0.812639	-0.928814	1.42134	1.64778	1.24798
107845447	-0.923817	-0.748361	-0.980615	0.146423	0.279698	-0.147785	-1.06893	-0.788942	-1.06694	-0.111893	-0.156847	-1.23209	0.0273587	0.0930834	-0.838548	0.0568695	-0.432558	0.304736	0.694547	0.639373	-0.191321	2.37211	1.72595	2.3485
107839305	-0.307772	-0.345156	-0.523098	-0.229958	-0.0334828	-0.261551	-0.762886	-0.55693	-0.464005	-0.44722	-0.508949	-0.505605	-0.552862	-0.597826	-0.321425	-0.352378	0.17183	-0.782035	0.302685	0.00178203	-0.362426	2.10413	2.38995	2.94518
107875622	-1.2273	-0.95947	-1.51018	0.0450878	0.51915	-0.245475	-0.642353	-1.38	-0.376222	0.554738	-0.108298	-0.0372452	-1.00602	-0.651487	-0.204982	0.479121	1.50872	1.2074	-0.307249	-0.469083	-0.386443	1.34377	1.77909	2.07473
107879042	0.40124	0.422113	-0.284207	0.0329236	0.328292	0.367509	-0.941433	0.603088	-0.108032	-0.645166	-0.53705	-0.0197348	-0.878408	-1.07907	-0.994621	0.653423	-0.548325	-0.544172	-0.661385	-1.3444	-0.544733	1.50976	2.50596	2.30643
107867052	-0.78283	-0.526163	-0.572607	-0.273146	-0.416596	0.0129797	-0.708681	-0.643338	-0.682723	0.550991	-0.899496	-0.321562	-0.640395	-0.453516	-0.64766	0.0193819	-0.393239	-0.0606062	0.1594	0.312024	-0.235171	2.07769	2.3251	2.80016
107854330	-0.684602	-0.690321	-0.676485	-0.683787	-0.684708	-0.694806	-0.621252	-0.623408	-0.60607	-0.51231	0.237802	-0.562636	-0.493162	-0.496305	0.366233	-0.100056	2.42115	0.237872	-0.276232	-0.183095	-0.462836	1.48522	2.32081	1.98299
107860070	-0.365675	-0.460928	-0.411097	-0.440483	-0.454655	-0.412831	-0.392537	-0.477899	-0.413385	-0.437687	-0.488551	-0.291699	-0.472587	-0.486493	-0.146781	-0.283172	-0.101403	-0.532356	-0.259264	0.125104	-0.413653	2.10045	2.53318	2.98441
107862952	-0.7709	-0.840115	-0.968378	-0.740846	-0.719705	-0.71138	-0.800233	-0.648702	-0.52873	-0.471217	0.161071	0.164616	-0.525223	-0.389084	-0.37431	0.124147	2.20321	0.638955	0.230634	-0.140587	-0.620859	1.59949	1.75529	2.37286
107875771	-0.840019	-1.10569	-0.780788	-1.13918	-1.04155	-1.21654	-0.892714	-0.83694	-0.730162	-1.09308	1.61187	0.814055	0.21549	-0.121673	-0.821387	1.05367	0.700843	1.01696	1.81047	0.35039	0.0029931	0.718966	0.913046	1.41097
107875407	-0.799777	-0.915582	-0.820185	-0.758522	-0.806448	-0.788255	-0.217016	-0.547579	-0.515962	-0.404886	-0.399385	-0.429121	0.0240952	-0.0848405	-0.0645386	-0.231801	0.307398	0.363485	0.448189	0.214395	-0.643411	2.52392	1.93676	2.60907
107843428	0.00408585	-0.515963	-0.192667	0.1002	-0.0127943	0.196379	-0.743168	-0.672739	-0.945655	-0.0594879	0.495767	-0.172153	-0.798846	-0.485951	0.895253	-0.910895	0.287998	-0.378892	-0.545667	-0.61266	-1.35083	1.48961	1.80382	3.12526
107856193	-0.764875	-0.764313	-1.04392	-0.028808	0.262697	-0.0794276	-0.874	-0.881086	-0.758988	0.101683	-1.172	-0.928455	-0.548162	-0.202793	-0.178075	-0.0413449	-0.159644	0.296548	0.425591	0.425275	0.159082	2.41264	1.87287	2.4695
107871773	-0.0846604	0.0549155	0.258602	0.796547	1.00997	0.577332	0.20465	0.0999252	0.60541	1.79303	-1.18214	-0.867907	1.32693	1.5768	0.597185	-1.04881	-0.483906	-1.33973	-0.44924	1.04732	-0.262094	-1.49432	-1.17351	-1.56231
107864085	-0.808371	-0.796971	-0.812963	-0.03911	0.316897	0.061907	-0.792673	-0.779094	-0.796095	-0.593984	0.474188	-0.590645	-0.707413	-0.689907	-0.548334	0.1771	0.972985	-0.158493	-0.426073	-0.018748	-0.275893	2.12749	2.45171	2.25249
107852865	-0.692619	-0.602999	-0.654868	-0.712849	-0.721178	-0.714066	-0.431177	-0.255936	-0.31558	-0.657604	0.975782	0.218784	-0.629904	-0.602315	0.115608	1.73694	0.726886	-0.418297	-0.529174	-0.397794	-0.671005	3.22911	0.459542	1.54471
107859450	-0.0690908	1.14602	0.914598	-0.374892	-0.823528	-0.718645	0.218122	0.515989	0.510003	0.502178	2.69441	-0.422508	0.959774	1.31166	-0.848781	-0.520453	0.350603	0.0442559	-0.473612	-0.0702029	-0.340449	-1.18199	-1.99561	-1.32786
107850626	-0.965462	-0.965595	-1.0178	-0.573142	-0.517813	-0.688507	-0.934976	-0.902778	-0.786842	-0.666874	1.16616	0.154851	-0.541074	-0.0510512	-0.0949167	0.0482822	0.552613	0.47763	1.42244	-0.315538	-0.61161	1.50329	2.07549	2.23321
107848163	-1.477	-0.727972	-1.0053	0.396879	0.637318	0.100582	0.386502	0.480787	0.705498	1.27453	0.800166	-0.108789	1.15719	1.3354	0.617084	-1.27016	-0.383406	-0.922395	-0.159491	0.550438	1.77618	-1.49943	-1.05537	-1.60926
107870028	-0.672991	-0.830396	-1.01247	-0.753701	-0.871338	-0.718787	-0.442061	-0.493952	-0.461294	0.182906	0.646092	0.287691	-0.945401	-0.919239	-0.154793	0.108338	0.907737	-0.879047	0.712267	-0.30229	0.187682	2.12089	2.01707	2.28709
107871317	0.909874	1.4943	0.0371833	-0.0331811	0.515814	0.790979	0.0823716	1.09957	1.3017	-0.0776802	-1.84506	-0.891735	0.924215	1.16707	-0.269357	-1.00087	-1.01199	0.545297	-0.468201	0.166307	0.891463	-1.41074	-1.58129	-1.33605
107878784	-1.13628	-0.960322	-1.19145	-0.00455116	-0.00815379	-0.226186	-0.911655	-0.488361	-0.770607	-0.356139	-0.161431	-0.695855	0.192488	-0.230087	-0.927773	0.176399	0.118678	0.00730343	0.417997	0.611869	-0.250244	2.21712	2.19817	2.37907
107851283	-0.537216	-1.07105	-0.478753	0.188111	0.0248267	-0.23606	-0.43114	-1.15854	-0.65727	0.919023	-0.663097	0.399702	-0.961949	-0.78333	-0.36476	1.31845	-0.125039	1.7611	-0.717158	-0.859131	-0.846091	1.64894	1.94643	1.684
107864111	-0.61693	-0.459919	-0.633806	-0.619059	-0.626675	-0.655372	-0.575637	-0.614229	-0.527771	-0.526824	-0.340554	0.0531224	-0.437202	-0.262859	0.874306	-0.543381	-0.248843	-0.371633	0.37677	-0.12023	-0.203466	1.55914	2.87775	2.64331
107859185	0.133838	0.18605	0.365085	-1.55823	-1.03157	-0.920971	1.17615	0.0356917	0.247862	-0.48586	1.35431	-0.458253	0.870631	0.964243	0.250551	-0.315814	0.384108	0.963165	1.68728	0.606935	0.463597	-1.17434	-1.9062	-1.83825
107852567	-0.50968	-0.697384	-1.02048	0.793719	1.60615	0.657018	-0.943191	-0.689658	-0.776541	0.487299	-0.707498	-0.230192	-0.729639	-1.09028	-0.915604	0.261294	0.558975	0.766921	-0.907727	-0.335098	-0.875507	1.76055	1.43092	2.10564
107872820	-0.660407	-1.10264	-0.871036	-0.609363	-0.811935	-0.554728	-0.491343	-0.604057	-0.132917	0.576686	-0.765758	0.195252	0.110634	0.207749	1.10841	-0.50214	0.422563	-0.668097	-0.33042	-0.390873	-0.710946	1.76029	2.44616	2.37892
107875528	-1.19337	-0.660671	-1.04473	-0.0244846	0.640724	-0.584658	-0.906755	-0.180355	-1.00446	-1.26	1.51909	-1.19652	-0.445859	-0.112413	-0.858877	0.426409	1.70492	1.37758	0.210122	0.193973	-0.638465	1.15216	1.13852	1.74812
107845658	-0.217346	0.295794	0.15792	-0.782395	-0.434603	-0.68282	0.735842	2.19963	1.2103	-0.941707	1.4236	-0.550297	0.785371	1.30678	-0.319146	-1.15761	-0.432806	-0.0896012	1.20509	0.492416	-0.0239123	-1.29123	-1.52794	-1.36133
107850928	0.670084	1.4852	0.211988	0.757839	0.912833	0.458026	-0.500741	-0.280477	-0.265036	0.943806	-0.851694	-1.36189	-1.15671	-1.06994	-0.794134	0.0100231	0.232277	-0.536242	-1.47836	-1.02004	-0.99167	1.51599	1.4619	1.64697
107862424	-1.01564	-1.08252	-1.03891	-0.972937	-0.909535	-0.965422	-0.850022	-0.538769	-0.52727	-0.570677	-0.0585917	0.33066	-0.30763	-0.125534	0.648271	0.183446	2.8458	1.04988	0.582161	-0.259991	-0.131026	0.668717	1.58798	1.45755
107858730	-0.369512	0.69094	0.352733	0.198753	1.08514	0.510528	-0.436283	0.732022	-0.273941	-1.1175	1.1789	-1.46001	0.60944	1.30067	-0.975203	-0.680816	-1.04384	2.35413	0.533085	0.598222	-0.159711	-1.24104	-1.03945	-1.34725
107867729	-0.773559	-0.773825	-0.773977	-0.454651	-0.0605973	-0.466523	-0.759453	-0.685625	-0.662792	-0.605834	1.19642	-0.565211	-0.647047	-0.62441	-0.699536	1.54839	1.30775	0.398303	-0.451647	-0.443675	-0.661554	2.1207	1.84522	1.69314
107839833	1.08148	1.13781	0.672312	-0.492732	-0.574861	0.475815	0.350072	0.721977	0.679354	-1.10401	0.622035	0.931245	-0.338157	-0.411526	0.724811	-0.337363	0.702961	-0.176136	1.01369	0.46909	0.0908666	-2.15002	-1.94316	-2.14556
107863234	-0.922397	-1.20319	-0.915021	-0.113155	-0.339397	-0.0395978	-0.662954	-1.10032	-0.772069	0.0245908	-0.28858	0.0233411	0.0404659	-0.151354	-0.668614	-0.0973776	0.475261	1.52313	-0.108222	0.0362597	-0.998471	2.19902	1.64518	2.41346
107878894	-1.18322	-1.20259	-1.11368	-0.193552	0.355056	-0.0616876	-1.06282	-0.531749	-1.21178	-0.245575	-1.1235	-0.380881	-0.0903525	-0.136498	-0.430109	0.338445	0.427238	1.18125	0.389549	0.557451	-0.207749	1.74597	1.77419	2.4066
107851404	-0.548052	1.26274	0.640656	0.292509	-0.115893	-0.674748	-0.564972	0.168874	1.67304	0.224784	-0.985918	-0.20416	-0.931029	-1.2174	-0.205312	-0.603125	0.238153	-0.659327	-1.58838	-1.05441	0.58735	0.227932	1.51631	2.52038
107863460	0.998266	0.00203324	0.591676	-0.468282	-0.240549	-0.445454	0.767221	0.0218492	-0.469337	-1.87587	0.611655	0.432337	0.66394	1.06086	0.249604	0.948674	-0.549762	-0.333822	2.3817	0.132653	0.237343	-1.34044	-1.91555	-1.46074
107878703	0.122919	-0.314353	0.0436794	-0.717586	-0.853585	-0.728476	-0.0278924	-0.678187	-0.106629	-0.27274	-0.456949	-0.115201	-0.653638	-0.822735	1.14411	0.0444925	-0.573939	-0.673147	-0.595092	-0.504806	-0.167574	1.68909	2.47004	2.7482
107878868	-0.967496	-0.6159	-0.871787	0.113467	0.410442	-0.040418	-0.786312	-0.557776	-0.892146	0.0901643	0.308361	-0.433401	-0.730487	-0.692643	-1.28386	0.818404	0.076361	0.946883	-0.405998	-0.318976	-0.603023	2.06754	2.33282	2.03578
107839294	-0.665377	-0.71086	-0.790736	-0.352969	-0.207213	-0.262466	-0.801438	-0.864623	-0.990369	-0.0985191	-0.496093	-0.816592	-0.0329498	-0.130184	-0.666397	0.0977959	0.497645	0.607986	0.544746	0.369305	-0.95131	1.71503	2.48656	2.51904
107873263	-0.957985	-1.01561	-0.502698	-0.210644	-0.273357	-0.0891387	0.09223	-1.21693	0.158118	1.24669	-0.402624	1.13779	-0.979404	-0.563724	1.78573	-0.336596	-0.381849	-0.311884	-0.241815	-1.03515	-1.06442	1.4475	1.68207	2.0337
107863806	-0.420602	-0.948843	-0.649403	0.0671287	0.239074	-0.31351	-0.875056	-0.610346	-1.18596	0.205341	-0.664281	0.013357	-1.06825	-1.01907	0.753715	0.886287	0.355416	1.54611	0.329393	-1.63255	-0.302902	1.61712	1.74165	1.93618
107852187	-1.25726	-0.997241	-1.10263	1.10149	1.74809	0.588807	-1.17671	-0.459306	-1.00594	0.803963	-0.793313	-0.489334	0.144547	0.160991	-1.3167	0.148235	-0.252494	-0.376296	0.0748278	0.81421	-0.921511	1.56524	1.49712	1.50122
107861979	-0.472404	-0.40153	-0.382184	-0.786976	-0.728597	-0.842791	-0.183273	0.143102	-0.0745217	-0.819524	-0.369924	-0.649663	-0.353441	-0.50537	0.37677	-0.222285	-0.0548187	-0.353902	-0.232952	-0.289052	-0.0415849	1.92878	2.09746	3.21868
107860407	-0.699293	-0.830237	-1.32372	-1.03526	-1.03982	-0.863153	-0.764483	-0.903435	-1.0289	-0.593478	1.11856	-0.600169	-0.575195	-0.476497	0.68685	0.866183	1.67523	0.350998	1.53792	0.627846	-0.00266181	1.71336	1.00024	1.15911
107866307	0.73101	0.123794	0.266093	-0.599783	-0.38606	0.413823	0.247268	-0.330245	-0.364426	-0.243898	-0.550434	-0.0568918	-1.03235	-0.828388	-0.531295	0.605049	0.0214112	-0.844844	-1.34557	-1.23426	-0.407275	2.75361	1.36279	2.23088
107851715	-0.568745	-0.58444	-0.590048	-0.475326	-0.396499	-0.515422	-0.598344	-0.561123	-0.561505	-0.309615	0.36477	-0.349349	-0.501984	-0.536326	-0.429297	-0.38152	2.168	0.0832996	-0.432016	-0.433905	-0.612699	1.42545	2.65919	2.13746
107858982	1.34322	1.21077	1.05858	-0.193511	0.368234	0.354446	0.577986	0.570602	0.864657	-0.599922	0.821605	0.548053	0.450645	0.688137	0.342444	-0.281916	-0.536518	-1.18538	-0.418824	-1.10159	0.644889	-2.13011	-1.03065	-2.36585
107840948	-1.02807	-1.23717	-1.16743	-0.305055	-0.0381263	-0.220152	-1.12558	-1.2975	-1.29058	-0.372861	-0.510148	0.547036	-0.418078	0.0907425	-0.0413447	0.886691	1.19413	-0.131022	0.279291	0.450593	0.0363741	1.8719	2.10175	1.72462
107841896	-0.968867	0.218811	-1.1956	1.1733	0.78585	0.387011	-0.683811	1.97415	-0.437908	0.419373	-1.25047	-0.431916	-0.710788	-0.068854	-0.253287	0.725121	-0.74378	1.12806	1.63098	0.364708	1.45349	-1.2351	-1.14771	-1.13277
107875646	0.00980944	-0.89484	-0.345291	-0.0168643	-0.256685	0.349969	-0.24893	-1.20497	-0.640941	1.85058	-1.27862	-0.137441	-1.01826	-1.09748	-0.223383	0.579126	-0.297585	-0.737076	0.494418	0.0312668	-0.605564	2.01671	1.51316	2.15889
107853745	-0.203133	-0.762062	-0.281592	0.787883	0.921443	1.29246	-0.562998	-0.865112	-0.373345	1.03137	-0.966707	-1.05545	-0.594125	-0.741664	-0.499694	0.171392	0.099077	-1.75596	-0.036128	0.261838	-0.78087	0.889941	1.30442	2.71901
107878620	0.824517	0.915952	-0.0990477	-0.624155	-0.0747978	-0.427117	-0.377907	0.232161	-0.0118745	0.534985	0.433405	-0.844377	-1.01219	-0.817091	0.184883	-0.90156	1.82947	-1.1254	-1.37709	-1.44824	-0.547959	0.948735	1.86728	1.9174
107877485	-0.466725	-0.513657	-0.57346	-0.74633	-0.578905	-0.805379	-0.697777	-0.245467	-0.0511332	-0.65946	0.752455	-0.242013	-0.661217	-0.533509	-0.0871273	-0.409217	0.357413	0.38027	-0.373976	-0.57126	-0.305962	1.66389	2.94027	2.42828
107854807	-0.760638	-0.772157	-0.759815	-0.289782	-0.203516	-0.455323	-0.730726	-0.656275	-0.732474	-0.604481	1.94284	0.134728	-0.591589	-0.622178	-0.719749	-0.166284	0.221333	0.691011	0.53555	-0.391956	-0.88796	1.56505	1.52789	2.72651
107862199	-1.50764	-1.43681	-1.54252	0.393065	0.628977	0.0748475	-1.13602	-0.42331	-0.686178	0.911831	-1.24277	-0.485915	0.0486935	-0.317503	-0.75025	1.1013	-0.267638	1.58422	0.0548803	0.65243	0.0220394	1.42005	1.61289	1.29132
107855235	0.0728403	1.31804	0.6401	1.33984	0.337908	1.61578	0.349778	1.01089	0.960228	-1.21435	0.289991	-1.14726	0.1204	0.355413	-0.47908	-1.28424	-1.80242	0.191135	1.17219	0.24418	-0.496765	-1.35528	-1.28864	-0.950661
107847848	-0.117441	-0.527603	-0.490291	-1.06599	-1.34441	-1.07608	-0.118634	-1.19201	-0.706009	0.739507	-0.510669	-0.101455	-0.564345	-0.474321	-0.230653	0.0592637	0.315754	0.539883	-0.323159	0.967756	-0.000888259	1.54369	1.98075	2.69735
107842795	0.732314	1.65364	1.03616	0.389099	0.841595	0.39173	-0.0107833	1.00571	0.835271	-0.00731412	-1.11026	-1.62014	0.549414	0.468478	-0.0643381	-0.760477	-1.48461	1.12576	-0.0137143	0.425451	0.18385	-1.9331	-1.11657	-1.51716
107843479	-0.488943	-0.172127	-0.698235	0.950817	1.59802	1.07774	-1.02472	-0.164774	-0.49677	1.47143	-1.82241	-1.32382	0.0173347	-0.375829	-0.16351	-0.601117	-0.724949	-0.431853	-1.16171	0.154737	0.0315629	1.21929	1.39035	1.73949
107847479	-0.344595	-0.822834	-0.732189	0.806136	0.867592	0.957554	-1.13205	-0.666378	-0.562589	0.419462	-1.09261	-0.0849019	-0.701329	-0.608148	-0.22644	0.477242	0.27829	-0.965621	-0.919143	-0.323916	-0.683175	2.07304	1.74994	2.23667
107875702	-0.485696	-0.988586	-0.955798	1.10552	1.06141	1.03538	-0.373881	-0.858372	-0.791822	1.07484	-1.0446	-0.250751	-0.313878	-0.999466	-0.654574	-0.380748	-0.169358	0.133324	-0.912387	-0.840587	0.270048	1.126	2.39292	1.82108
107850803	-0.265294	-0.452797	-0.431166	0.131311	0.176888	0.122117	-0.638961	-0.543643	-0.884966	-0.190512	-1.26233	-0.539487	-0.636484	-0.622087	-0.388578	-0.284669	-0.370049	0.0569658	0.232489	0.242691	-0.556896	2.32147	1.82298	2.96101
107875782	-0.196654	0.847415	-0.354825	-0.576039	0.590781	-0.579038	-1.10199	0.153241	-1.18017	-1.25153	1.0661	-1.76228	0.0961461	-0.214256	-0.740016	-1.33152	1.77474	1.07933	0.0524571	-0.424808	0.0285437	1.63991	1.54962	0.834835
107847528	1.60504	1.17985	1.46516	-1.14219	-1.00313	-0.871631	1.22877	0.671968	0.659215	-0.5475	0.172818	-0.152861	0.614462	1.21799	0.049877	-1.42869	0.625144	-0.106631	-0.200591	0.408809	-0.151241	-1.5412	-1.80238	-0.951051
107867621	-0.52453	-0.478871	-0.577207	-0.229068	-0.17413	-0.390592	-0.349649	-0.594737	-0.449942	-0.313429	-0.382004	0.0487653	-0.846877	-0.989552	0.281728	-0.455625	1.4072	-0.242099	-0.427045	-0.251221	-0.90358	1.82552	2.49195	2.52499
107865815	-0.443505	-0.684472	-1.24772	0.491981	0.900351	0.0565733	-1.42548	-0.305091	-0.574442	0.408758	-0.923829	-1.07896	-0.57819	-0.349667	0.0339073	-0.605067	0.52527	1.13083	-0.631457	-0.441585	-0.0792855	1.22267	2.16467	2.43374
107843354	-1.10851	-1.44182	-1.42347	-0.552001	-0.385617	-1.02292	-0.849855	-1.09039	-0.925326	-0.0790639	0.101957	0.779792	-0.279506	-0.0359414	0.195905	0.774579	1.96226	0.0788955	0.803167	0.492347	-0.456947	1.50389	0.997047	1.96154
107873551	0.915542	1.02985	0.895314	0.463542	-0.400543	-0.276297	0.938269	1.41958	0.528094	-1.15549	1.16709	0.213834	0.925334	0.406826	-0.349134	-0.610952	-0.704281	-0.137196	1.05031	-0.571173	-0.15367	-1.82183	-1.95334	-1.81968
107863504	-0.154726	0.438469	0.296538	-0.362874	-0.432201	-0.138477	-0.255795	0.347096	0.445517	0.550262	-0.966709	-0.644157	-0.724166	-0.717289	-0.934692	-1.06533	0.67772	-1.72647	-0.365098	-0.928342	0.729941	1.35442	2.2801	2.29627
107867043	-1.23345	-1.39304	-1.1994	-0.85688	-0.873323	-0.52228	-0.0553818	-0.850751	0.0741285	0.324113	0.139226	0.407866	-0.418026	0.430004	0.677718	-0.176298	1.3035	1.91863	-1.15625	-0.284365	-0.465898	0.726317	2.39209	1.09176
107871049	-0.699696	-0.708237	-0.727217	-0.343875	-0.199783	-0.513145	-0.741665	-0.645455	-0.638178	-0.301164	0.88585	-0.35251	-0.525723	-0.580325	-0.373225	-0.451597	1.68738	-0.135181	-0.188524	-0.345396	-0.554901	1.56158	2.42608	2.46492
107875554	-0.863484	-0.945625	-0.956574	-0.962993	-0.958168	-0.975213	-0.296511	-0.289102	-0.291684	-0.51935	-0.842733	0.0175466	-0.0783191	-0.178654	1.74278	0.000496617	2.47302	0.262568	-0.358312	-0.229373	-0.133473	1.10981	2.06321	1.21014
107867949	-0.813695	-0.653098	-0.577616	0.517043	0.946176	0.80602	-0.450128	-0.132432	-0.567753	1.04309	-1.97635	-1.06595	-0.268467	-0.699443	-0.228116	-0.517211	-0.416016	-0.507679	-0.908651	0.240313	0.807255	1.27272	1.9883	2.16169
107876034	0.422495	0.792673	0.524087	-1.15467	-0.441796	-1.20856	0.44747	0.729821	0.117893	-1.14247	2.39453	0.184788	0.269597	0.406278	0.98967	-0.320442	-1.02873	0.904384	0.110915	-0.374572	1.18511	-0.716068	-0.817454	-2.27495
107845043	0.934024	-0.128324	0.313603	0.794636	0.589941	-0.607755	0.525756	0.929682	0.35089	0.0538825	0.451932	0.729189	1.0496	0.846933	0.0581589	-0.210791	-2.0725	-1.00925	1.29421	-0.894747	0.559979	-2.12123	-0.437763	-2.00005
107860671	-0.776405	-0.814879	-0.778903	-0.638663	-0.772384	-0.602918	-0.580137	-0.837358	-0.509334	-0.0229731	-0.451698	-0.351426	-0.50629	-0.268787	1.01202	-0.159721	0.600743	-0.434104	0.172524	0.150912	-0.276205	2.40029	2.68833	1.75736
107850359	1.47358	1.29889	1.25451	1.06209	0.927756	0.863386	1.04926	0.527368	0.513399	-0.245334	-1.02014	-0.612673	0.659971	0.427502	-0.0872254	-0.829043	-1.7885	-0.89254	-0.556046	-0.39288	0.485587	-1.30876	-1.2547	-1.55547
107867363	-0.770497	-0.889487	-0.937966	0.882544	0.755485	1.48173	-0.602467	-1.06275	-0.947993	0.113425	-1.01046	0.236099	-0.883977	-0.75365	-0.538526	0.798372	0.87696	-0.93154	-0.407323	-0.166227	-0.514838	1.77181	1.93565	1.56563
107850980	0.386441	0.297342	0.0118965	0.338668	-0.114385	-0.64842	0.0380199	0.218494	0.931144	-0.646207	-0.302311	1.2165	1.43754	1.32797	0.660765	-0.434268	-0.472451	-0.837019	1.24358	-0.836539	1.48253	-1.7067	-2.04066	-1.55193
107856401	-0.497342	-0.349166	-0.655715	-0.759953	-0.457104	-0.455064	-0.330905	-0.324525	-0.500527	-0.443102	0.257427	1.08251	-0.622971	-0.302659	-0.612523	-0.159157	0.892952	-1.8142	-0.237172	-0.40728	0.2919	2.22455	1.6739	2.50613
107861761	-0.919423	-1.09649	-0.742693	0.880226	0.518439	0.826425	-0.669356	-1.04303	-1.03776	0.93475	-1.51752	-0.639783	-0.359567	-0.484656	-0.930568	0.366197	0.438802	0.555362	0.279657	0.576498	-0.971571	1.40379	2.4028	1.22947
107842626	0.229837	0.596985	1.32976	0.523479	1.74704	0.915321	1.10207	1.02783	0.998279	0.871251	0.0208324	-0.640753	0.356673	-0.286917	-0.430559	-0.401894	-1.24961	-1.33942	0.143951	-0.499932	-0.379495	-2.04453	-0.871073	-1.71912
107853464	-0.651683	-0.583278	-1.11796	1.57636	1.1118	0.973587	-1.23592	0.394466	-0.945227	1.50144	-0.83389	-1.32879	-1.08804	-0.886833	-1.04044	0.344062	0.891675	-0.0237723	-0.277364	-0.582916	0.161047	0.879071	1.26687	1.49573
107863055	-1.08131	-1.36782	-1.29298	-0.89598	-0.554159	-0.514849	-0.837485	-0.281488	0.20911	-0.764752	-0.391048	-0.109645	-0.176478	-0.470384	0.230468	0.170064	1.55983	1.31952	0.613763	0.796617	-1.11485	1.13841	1.88168	1.93376
107862891	1.84403	1.20909	1.01488	0.757098	0.272813	0.995064	1.29787	1.10386	0.00598226	-0.129956	0.526038	-0.29535	0.303974	0.257589	-0.102845	-0.698679	-1.08729	-1.4	-0.127785	-0.676707	-0.23961	-1.50729	-1.48489	-1.83789
107855889	-0.823559	-0.788642	-0.902197	-0.0928546	0.147014	-0.395637	-0.805969	-0.528145	-0.74264	0.392258	-0.495645	0.0942071	-0.790651	-0.810604	-0.590063	0.749226	2.05606	0.531671	-0.674246	-0.706927	-0.524427	1.85574	1.78209	2.06394
107879382	1.23007	1.66602	1.59474	0.0255423	0.303271	-0.233168	0.388027	1.12029	0.732417	0.372133	-1.61399	-1.55367	0.520131	0.558742	-0.217315	-1.71781	-1.52103	-1.18355	-0.196685	0.691054	0.507795	-0.526482	-0.220949	-0.725578
107839079	1.06798	1.14682	1.61297	0.221013	0.174316	0.482142	1.35043	0.93546	1.00831	0.387258	-0.39509	-0.781398	0.171479	0.964799	-0.630422	-0.516808	-0.770041	-1.04344	0.378757	-0.662358	-0.173641	-1.17449	-2.44889	-1.30517
107843736	1.08906	1.28688	1.1292	1.01586	1.00962	0.95191	0.215192	-0.0670249	0.0371122	-1.09033	0.706865	-0.372456	0.0653166	-0.057847	0.695355	-1.29931	0.18953	-0.845474	0.896357	0.478803	-0.741597	-1.77472	-1.44744	-2.07086
107848158	-0.142857	-0.391555	-0.0951886	-0.606791	-0.599896	-0.569638	-0.0171816	-0.431411	-0.0440538	-0.456487	-0.206718	-0.424695	-0.515633	-0.458795	-0.0146823	-0.326414	-0.404583	-0.439428	-0.471851	-0.372877	-0.578639	2.03457	2.92851	2.60629
107845704	-0.352889	-0.0719995	-0.57368	0.718456	0.277133	0.964675	-0.870436	-0.707823	-0.323142	0.839399	-1.96832	0.46093	-0.740715	-0.675122	0.0128103	0.0784271	-0.474027	-1.94972	-0.360947	0.105829	0.802568	1.8122	0.702141	2.29425
107854228	-0.885249	-1.05853	-0.994974	0.331084	1.10981	0.32646	-0.785069	-0.579634	-0.631618	0.834733	-1.04414	-1.30018	-0.18635	-0.603833	0.258166	0.427898	-0.236125	0.118738	-0.210827	-0.203926	-0.749922	2.09822	1.66823	2.29704
novel.5097	-0.927715	-0.864788	-0.908743	-0.374479	-0.305372	-0.492019	-0.778804	-0.763902	-0.766686	-0.490721	2.14533	0.725887	-0.629224	-0.558856	-0.751835	1.22304	2.29065	0.854236	-0.371609	-0.67569	-0.632752	1.01195	0.80684	1.23527
107850165	-0.38835	0.0141175	-0.142123	0.610913	1.18114	0.658464	-0.704936	-0.223159	-0.27773	0.955222	-1.89547	-1.51856	0.0808915	-0.465018	0.0547727	-0.930773	-1.0717	-0.320178	-1.06556	0.187813	0.00962933	1.82946	1.22128	2.19985
107858651	-0.948067	-0.790725	-0.947254	-0.0974297	0.0680229	-0.355011	-0.879402	-0.374216	-0.840939	-0.556368	0.112457	-0.402519	-0.270659	-0.216849	-0.678888	-0.129668	0.47142	0.48916	-0.0217438	-0.196965	-0.533918	2.1343	2.29859	2.66666
107843637	0.175747	-0.19112	0.0802755	1.11828	1.69294	1.2865	-0.12505	0.00238261	-0.562234	0.922549	-1.73235	-0.659518	-0.359829	-1.0422	-0.519062	0.183752	0.111182	-0.915192	-1.55551	-0.887032	-1.04237	0.907394	1.88158	1.22887
107866782	-1.08614	-0.962567	-1.4316	-0.0225326	0.912451	-0.00588899	-1.00086	-0.0921122	-0.205428	-0.0728271	-1.24571	-0.821262	-0.611493	-0.425647	-0.637265	1.14901	1.10258	0.501769	-0.32266	0.186958	-0.376818	1.76055	2.45583	1.25165
107863302	-0.732147	-0.756981	-0.719738	-0.56601	-0.619318	-0.468508	-0.670402	-0.732313	-0.710872	-0.151624	1.06486	1.04083	-0.705264	-0.70383	-0.615908	0.665722	1.97036	-0.0572193	-0.427923	-0.619244	-0.726475	1.77903	1.11428	2.3487
107848022	-0.970518	-0.993632	-0.467176	-0.347162	0.116087	-0.384547	1.56524	1.12733	0.97837	-0.727574	-0.787024	-0.943862	-0.718323	-0.732088	0.241443	0.0731786	-1.11793	0.506479	-0.182782	-0.119965	-1.20799	2.39691	1.76365	0.931886
107861353	-1.10576	-0.501237	-1.10291	1.07449	0.789977	1.09508	-1.23762	0.576105	-0.922608	0.387431	0.200412	1.28692	1.03276	0.205196	-0.879285	0.36959	-0.84528	-0.248439	1.69548	1.21815	0.703827	-1.45835	-1.53553	-0.798394
107852353	0.304999	0.762477	0.666377	0.0826255	0.660013	0.661236	0.713013	1.73078	-0.195756	0.0566553	-0.34121	-0.850067	0.357758	1.04417	-0.852758	-0.0509152	-0.483681	0.208725	-0.18046	-0.618291	1.81577	-1.44856	-1.56917	-2.47371
107847985	0.639305	1.00878	0.286107	0.471468	1.52339	0.445861	-0.160342	0.576545	-0.279237	-1.33815	1.52999	-2.17221	0.639169	0.791998	-1.48737	0.24326	-0.321919	0.62479	-0.0576633	0.188039	0.656219	-0.850373	-1.2593	-1.69835
107872796	-0.147737	-0.319135	0.633835	-0.028046	-0.242484	-0.328439	-0.922902	-0.340267	0.146394	1.2816	-1.30814	-1.91398	0.860318	0.157379	-0.766162	-1.20422	2.36061	0.772895	-0.486582	0.313681	-1.42625	0.6641	1.15436	1.08917
107864429	-0.837502	-0.898809	-0.998015	-0.187318	-0.35248	-0.0618506	-0.667233	-0.738988	-0.698344	0.319142	-0.743121	-0.683605	-0.0548885	-0.193358	-0.140703	0.0539771	0.859079	-0.28527	-0.322807	0.383326	-0.655854	1.89146	2.39738	2.61578
107863868	0.0940181	0.313101	0.0241543	0.973041	1.14893	1.9139	0.101529	0.485297	0.238175	2.20475	-1.16081	0.807717	-0.472816	-0.145693	-0.0921606	0.30766	-0.606936	-1.03756	-0.261386	-0.77475	0.525149	-1.33928	-1.63043	-1.61561
107840734	-0.856008	-0.689185	-0.944192	0.3769	0.882589	1.14155	-0.099395	-0.382356	-0.827985	-0.0806542	-0.748359	-0.038682	-0.639351	-0.705737	-1.31435	1.44749	-0.404057	0.305512	-1.45297	-0.487905	0.114205	2.03702	1.4545	1.91142
107859339	-0.434364	-0.545315	-0.571262	-0.737518	-0.705166	-0.728845	-0.311634	-0.409374	-0.409698	-0.534427	-0.519829	-0.630577	-0.170094	-0.38968	-0.261112	-0.443496	0.160612	0.0728145	0.0196854	0.515255	-0.341915	2.06408	2.68155	2.6303
107878105	-1.15476	-0.885912	-0.978346	0.0822675	0.193617	-0.10458	-0.907396	-0.621563	-0.898168	-0.470956	0.35129	-0.285119	-0.597813	-0.485867	-0.856881	0.590471	0.890444	0.441932	-0.126722	0.0421329	-0.735609	2.00867	2.29473	2.21413
107840383	-0.481742	-0.494563	-0.497897	-0.49687	-0.496191	-0.499501	-0.478849	-0.459845	-0.431532	-0.467656	-0.258038	-0.337566	-0.448833	-0.408291	-0.399736	-0.0367611	0.240746	0.365592	-0.364773	-0.3719	-0.478902	1.51302	3.23651	2.55358
107858946	-0.833592	-0.452572	-0.854074	-0.220262	0.381332	0.347928	-0.429939	-0.785795	-0.102825	-0.773877	0.719148	-0.444005	-0.794056	-0.914282	-0.61307	1.24658	1.29658	-0.151562	-0.97351	-0.634136	-0.783043	1.91253	1.30681	2.54969
19988959	-1.0853	-0.608633	-0.76701	-0.27075	-0.697944	-0.672613	-1.09991	-0.650745	-0.595554	-0.17102	2.13694	-0.00190766	-0.779074	-0.190626	-0.803469	2.10455	0.784842	-0.220136	0.451248	-0.702856	-0.345245	1.75632	1.08567	1.34321
107839443	-0.945142	-0.945827	-1.11723	0.816447	0.862439	1.20002	-0.955294	-0.678276	-0.956282	0.0151527	-0.615058	0.476572	-0.630371	-0.692849	-0.923238	0.985439	0.478852	0.417051	-0.820092	-0.704047	-0.607859	1.99392	1.61619	1.72947
107850860	-1.17163	-1.1729	-1.12907	-0.828439	-0.766593	-0.850317	-0.795447	-0.426585	-0.58566	-0.169542	0.574371	0.434433	-0.0560601	-0.259947	-0.369855	0.305987	1.17741	2.45247	-0.170169	-0.251024	-0.412597	0.849968	1.68512	1.93608
107858658	-1.08156	-1.15636	-0.805586	0.190841	0.875631	0.144849	-0.86053	-1.10457	-0.966433	-0.359409	1.05035	0.044605	-0.767489	-0.822829	-0.891935	0.860966	0.791514	0.380201	-0.142988	-0.355304	-0.678325	1.96639	1.69733	1.99063
107847741	-0.631596	-0.642802	-0.824278	-0.796427	-0.578671	-0.909634	-0.687072	-0.25384	-0.313594	-0.20937	-0.221515	0.152546	-0.566089	-0.336192	-0.574635	-0.10708	2.65888	-0.154806	-0.276154	-0.215656	-0.147401	1.76067	2.35022	1.52449
107856263	0.703665	1.65315	1.5481	0.109872	0.296623	0.25049	0.857163	1.58012	0.224009	0.498167	-1.66934	-1.62114	0.81921	0.280543	-0.506361	-0.873689	-1.51098	-0.940809	-1.54802	0.626793	0.186797	-0.440731	-0.557344	0.0337087
107842968	0.258846	0.168333	0.44801	-1.12784	-0.141885	-0.383619	1.99967	0.381733	-0.0209305	0.608616	0.685363	0.746906	2.12197	0.900054	-0.0491139	-1.03581	-0.158981	-0.887501	-0.602069	0.979876	-0.546085	-0.985511	-2.05663	-1.3034
107860420	-0.962409	-1.01639	-1.2816	-0.7357	-0.688321	-0.495065	-0.534547	-0.484477	-0.627809	-0.400996	-0.68822	0.0162321	-0.094499	-0.217927	-0.583179	0.821384	0.970517	1.02829	0.441675	-0.349423	-0.291363	1.76608	1.82765	2.5801
107868274	-0.740055	-0.591087	-0.742726	0.272119	0.608467	0.0870094	-0.912775	-0.71707	-0.736538	0.320031	0.0266832	-0.0481893	-0.962968	-0.951545	-0.867356	0.680914	0.845885	-0.627654	-0.504232	-0.655514	-0.230478	2.63368	1.87813	1.93527
107855483	-0.791032	-0.738326	-0.750136	-0.650172	-0.573493	-0.585935	-0.489372	-0.498252	-0.491791	1.36181	-0.511476	-0.16994	-0.437458	-0.475798	-0.361159	0.719847	0.0883719	0.565426	-0.615882	-0.445374	-0.558298	2.14557	2.94511	1.31775
107847781	1.00108	1.60678	0.740949	0.435054	0.16648	-0.797525	0.432953	1.34661	1.19356	0.473286	-1.22615	-0.99478	1.15467	-0.321549	-1.10324	-0.342617	-1.69904	0.754765	-0.0371936	0.393581	0.695179	-1.2408	-1.2929	-1.33914
107858540	0.925107	0.769265	1.13685	0.189699	0.036971	0.476728	0.90069	0.843348	0.609345	0.529563	-1.51506	-1.04256	1.43522	0.9479	0.306838	-1.60025	-0.994889	-1.32869	-0.540175	1.10397	0.41683	-1.28573	-1.30088	-1.02009
107855063	-0.650764	-0.674738	-0.713498	0.390082	0.882148	0.724363	-0.699966	-0.726571	-0.697478	-0.208602	0.383831	-0.54743	-0.725888	-0.707121	-0.701898	-0.200975	0.73315	-0.461545	-0.629618	-0.689019	-0.651813	1.96951	2.1031	2.50074
107853213	0.518229	0.524713	-0.452593	0.232355	0.196674	-1.02957	0.630551	0.765136	0.618544	-0.7452	0.407625	1.30915	0.335736	-0.43919	1.12765	0.975044	0.30427	-1.20012	-0.167079	-1.05356	2.02772	-1.63741	-1.74515	-1.50354
107858310	-0.590613	-0.517591	-0.562776	-0.498118	-0.547581	-0.720212	-0.727436	-0.644922	-0.503479	-0.596184	1.10901	-0.481005	-0.421688	-0.510217	-0.454868	-0.218881	2.32384	-0.354535	-0.206142	-0.199596	-0.503997	1.68591	2.15052	1.99057
107878057	0.380946	-0.611242	-0.277809	1.09485	0.996248	0.681946	-0.77519	0.671889	-0.40887	0.376558	-1.13536	0.680311	1.37716	1.05956	0.0337726	-0.119852	-2.26772	0.821907	1.36863	0.583408	-0.81932	-0.85629	-1.63599	-1.21955
107870629	-0.60389	-0.95177	-0.518086	-0.114185	-0.29016	-0.54249	-0.811605	-0.580619	-1.09273	0.126502	0.801237	-0.165519	-0.56199	-0.836598	-0.863995	-0.0998064	0.750829	1.09012	-0.0439979	0.225838	-1.14215	1.56329	2.29493	2.36684
107870125	0.527894	-0.434199	0.00862083	-0.28867	0.20983	-0.381136	0.670175	-0.118544	-0.265803	-0.790904	1.91158	-0.130753	1.77704	1.56315	-0.0816672	-1.37016	0.660689	0.91918	0.426332	0.395307	-0.233912	-1.75231	-1.5415	-1.68025
107870616	-0.97678	-0.0366466	-0.674261	0.71545	0.972966	0.509163	-0.465017	0.0281264	-0.603411	-0.464253	0.909035	-0.661625	-0.765882	-0.711493	-1.03986	0.0351334	-0.387483	-0.637327	-0.294885	-1.19078	-0.45105	2.52231	2.2085	1.46008
107866959	-0.934889	-0.956227	-0.997866	-0.564525	-0.614155	-0.617845	-0.848155	-0.806165	-0.905586	-0.283647	1.39192	1.21648	-0.535804	-0.48571	-0.835353	1.42857	1.51795	1.1308	-0.163934	-0.379844	-0.818234	1.7506	1.27751	1.0341
107860532	-0.791448	-0.835873	-0.82799	-0.754354	-0.703664	-0.781161	-0.710238	-0.628986	-0.68536	-0.502844	-0.300397	-0.0988981	0.202517	-0.157241	-0.45038	0.0657251	0.94746	0.225284	-0.224538	0.72919	-0.442507	1.71266	2.28914	2.7239
107875879	-0.387967	0.13559	-1.02475	0.794181	0.994686	0.802784	-0.548804	-0.081784	-0.680087	0.309415	-0.358017	-0.147496	-1.61663	-1.28472	0.233084	0.997215	-0.0166397	-1.30629	-0.977909	-1.09058	0.191715	1.17285	1.52299	2.36715
107864423	-0.16384	-0.494389	-1.57097	0.625774	0.785004	0.0118754	-0.517631	0.460813	0.12017	0.614092	-1.58539	-0.212784	-1.04793	-0.842523	-0.526115	1.14232	-0.52018	1.18566	-1.50133	-0.782947	0.0836236	1.38408	2.09254	1.26008
107873720	-0.429436	0.127694	0.354487	0.191937	-0.363068	-0.571522	-0.211388	0.91941	0.719677	0.666254	0.569925	-1.15368	2.10208	0.982895	0.404041	-0.654717	-1.76727	0.440691	0.766188	0.603704	0.888116	-0.961884	-1.54387	-2.08027
107843193	-0.742576	-0.757811	-0.556347	-0.405487	0.135038	-0.516982	-0.488747	0.162636	-0.386104	-0.309133	-0.192945	-1.31438	0.126992	0.221261	-0.262522	-0.739109	-0.0888629	-0.084365	-0.401039	-0.306849	-0.116566	1.56655	2.2135	3.24385
107854885	0.244855	0.932048	1.32214	1.38543	1.07862	1.4437	0.589802	0.168711	0.549511	0.884195	-0.198528	0.694305	-0.521713	-0.827706	1.3249	-0.621066	-0.638262	-1.42524	-0.681379	-0.739268	-0.76578	-1.51646	-1.60778	-1.07503
107859056	-0.976365	-1.02538	-1.00275	0.194762	0.173418	0.0278389	-0.899137	-0.88221	-0.932353	-0.0653575	2.35554	0.324447	-0.755707	-0.732212	-0.805803	0.640018	1.00159	0.863506	-0.379432	-0.767169	-0.753208	1.23147	1.39721	1.76729
107859134	1.01557	0.797214	0.866226	-0.44112	-0.410703	-1.11346	1.10544	0.62707	0.107466	-1.11457	1.92063	-0.866145	1.56587	0.764215	-0.923329	-1.26494	0.08905	0.797604	-0.48778	0.945088	-0.42177	-1.2238	-1.10032	-1.23351
107875995	-0.365905	-0.612597	-0.394249	-0.440674	0.0827098	-0.487991	-0.262373	0.292912	0.653538	-1.024	-0.0713515	-0.920673	-1.13712	-0.72254	0.860114	0.145666	1.37619	-0.83147	-1.03891	-0.673214	-0.311586	2.1706	1.14311	2.56982
107863530	-0.411479	-0.422814	-0.569832	-0.388464	-0.305338	-0.373353	-0.57426	-0.485536	-0.533047	-0.25359	-0.625589	-0.449823	-0.574999	-0.573468	-0.345118	0.207141	0.899134	-0.167263	-0.453429	-0.468799	-0.494872	2.51516	2.53041	2.31922
107847423	0.0561824	0.519022	0.580635	0.679765	1.85957	0.398547	0.416928	0.925456	0.965653	-0.401183	-1.82056	-0.765462	0.498295	0.311414	0.568089	-1.1011	-2.70612	0.341348	-0.72077	0.274858	0.98225	-0.539557	-0.314671	-1.00858
107876107	0.358557	0.510369	-0.00403645	0.0173645	0.0959114	-0.425634	0.757733	0.682632	0.19788	-0.0255002	-1.05832	-0.565481	-1.1952	-1.61044	-0.449138	0.499844	0.465508	-0.996119	-1.31202	-1.60324	0.351163	1.30107	2.20572	1.80137
107862714	0.30612	0.844435	0.706746	0.340021	0.37969	0.778904	0.951824	1.89751	0.353011	-0.951915	0.261514	0.288133	0.845309	0.382267	0.432619	-0.197627	-1.13775	-1.40889	0.629312	-0.686821	0.389283	-1.91549	-1.74948	-1.73873
107848045	1.16352	1.12087	1.46006	-0.123313	0.117974	0.157153	1.08344	0.949617	1.20884	-0.114255	-1.49904	-0.472677	0.22247	0.524084	0.620656	-0.97117	-1.26077	-0.664995	0.283955	0.238805	0.767524	-1.4923	-1.53155	-1.78889
107845441	-0.516264	-0.822386	-0.437572	-0.380798	0.419457	-0.27162	-0.403467	-0.716699	0.497932	0.604741	-0.22489	-0.458508	-0.772503	-0.933195	-0.284069	1.07366	0.388862	0.624353	-1.31673	-1.61547	-0.273968	2.68965	1.31144	1.81805
107843464	-0.925542	-0.919266	-0.916977	-0.885362	-0.872511	-0.925305	-0.900132	-0.524876	-0.708291	-0.76266	0.502854	-0.73841	-0.0486433	-0.125877	-0.00388601	0.629201	1.15194	2.27612	0.0291357	0.0756714	-0.281254	1.31247	1.87138	1.69022
107863841	-0.489379	-0.432997	-0.480044	0.142232	0.663738	0.9109	-0.299921	-0.816112	-0.45884	0.0954223	-1.31718	-0.569786	-0.660922	-0.880411	-0.192157	0.434148	0.192443	-0.963998	-0.552558	-0.276414	-0.646381	2.09374	1.87494	2.62953
107879974	-0.695921	-0.693965	-0.691403	-0.617549	-0.602396	-0.625496	-0.628936	-0.608954	-0.573075	-0.220701	0.257668	-0.315474	-0.497381	-0.393248	-0.139777	-0.203111	1.21338	-0.241112	0.00868377	-0.150377	-0.480415	1.57471	2.98468	2.34017
107842757	-0.841453	-0.835023	-0.807663	-0.47433	-0.168959	-0.374917	-0.567133	-0.507424	-0.643377	-0.0304999	-0.564831	-0.248039	-0.324225	-0.352972	-0.301618	0.0310868	0.0782463	-0.0783067	0.030376	-0.0606702	-0.405668	2.18358	2.78801	2.47581
107842686	-0.243302	-0.642491	-0.735399	0.659104	0.733224	0.845097	-1.05354	-0.487115	-0.618954	0.591657	-1.5275	-0.643329	-0.638206	-0.800919	-0.334526	-0.120627	-0.346359	-0.737966	-0.387275	0.100252	0.0692199	1.84046	2.07624	2.40225
107840378	0.2161	-0.520555	0.277449	-1.15642	-1.59005	-0.984128	1.26817	0.315497	0.570261	0.0398673	1.14254	0.66904	1.45091	0.723723	0.126183	0.285979	-1.17904	0.598455	0.424171	1.42299	0.370616	-0.925094	-1.66996	-1.87671
107862179	-0.6259	-0.661834	-0.613122	-0.696253	-0.705293	-0.704876	-0.432991	-0.139467	-0.217004	-0.61364	-0.399075	-0.365509	0.0447147	-0.110538	0.469016	-0.392795	0.0622105	-0.333141	-0.21399	-0.0740093	-0.464554	1.46965	3.09529	2.62311
107870291	-0.575741	-0.411771	-0.468851	-0.256882	-0.0720161	-0.358883	-0.622473	-0.551606	-0.575857	-0.373146	-0.477126	-0.404929	-0.396734	-0.34557	-0.0813549	-0.547305	-0.436777	0.397101	0.302883	-0.0531029	-0.50974	1.92496	1.1145	3.78041
107862734	-0.435704	-0.261644	-0.396716	1.01962	1.48629	1.11971	-0.881794	-0.580084	-0.862932	0.795864	-1.28397	-0.238768	-0.823541	-0.836385	-0.673039	0.276832	0.00297071	-0.359659	-0.982814	-0.725835	-0.744887	1.52475	1.8347	2.02703
107864552	-0.310683	-0.212841	-0.358667	-0.584039	-0.0115372	-0.4595	-0.455276	-0.413768	-0.617458	0.216502	-0.566097	-0.135706	-0.370573	-0.620543	0.254096	-0.906179	-0.116163	-0.924982	-0.438295	0.349573	-0.627498	2.04019	2.61906	2.65039
107854198	-0.0628563	0.316798	-0.0787843	0.913188	1.7844	0.0464398	-0.123423	-0.151538	-1.50379	-0.612125	0.592533	-1.57566	1.29437	1.09256	-0.97002	-0.514377	-0.563359	1.12197	0.371863	1.66707	0.449005	-0.676627	-1.69527	-1.12236
107860269	-0.845288	-1.05694	-1.01708	-0.60664	-0.395865	-0.451407	-0.380686	-1.31934	-0.864916	0.268382	1.14216	2.04303	-0.693772	-0.898272	-0.0786742	0.470157	1.53886	-0.596008	0.866045	-0.0146846	-1.00291	1.36819	0.975629	1.55004
107861754	-0.182154	-0.517102	-0.401373	-0.451544	-0.30281	-0.32264	-0.398146	-0.60949	-0.753775	-0.0937673	-1.19054	-0.201866	-0.745818	-0.518536	-0.237057	0.0816325	0.1796	-1.09843	0.320406	0.605616	-0.247516	2.2136	2.16274	2.70898
107862305	0.0941782	-0.308896	-0.637723	0.14507	-0.267636	0.243426	-0.379031	0.0615963	-2.00963	-0.212885	-1.76424	0.241705	-0.00616687	0.762005	0.121575	2.38128	-1.00819	-0.965738	0.23692	-0.618351	-0.0698389	1.80964	0.488857	1.66208
107859811	-0.614212	-0.348298	-0.151161	0.0852801	0.516723	0.131397	-1.14259	-0.141412	-0.393633	0.342003	-1.43839	-1.50074	-0.167805	-0.649699	-0.0517316	-0.807215	0.181248	-0.145685	-0.408279	0.125958	-0.0864538	2.08918	2.49686	2.07865
107873179	-0.459552	-0.536683	-0.468795	-0.637637	-0.648106	-0.651738	-0.152474	-0.259602	-0.19519	-0.632254	-0.112013	-0.290675	-0.337295	-0.484596	1.06217	0.505051	-0.444204	-0.379418	-0.313978	-0.394683	-0.654365	1.18608	1.60192	3.69804
107859213	-0.640388	-0.691016	-0.661122	0.28733	0.294943	0.651496	-0.632183	-0.709899	-0.722532	0.0321135	-0.979637	-0.138057	-0.523475	-0.507838	-0.781014	1.02829	-0.537241	-0.41053	-0.584578	-0.302057	-0.289875	2.28094	2.19535	2.34097
107858908	-0.308743	-0.847342	-0.218699	0.030598	0.157711	0.189664	-0.287392	-1.3055	-0.982832	0.778923	-0.998178	-0.161168	-0.385273	-0.814755	0.0477982	-0.0480959	0.187172	-0.715442	-0.277066	0.0955328	-0.772374	2.04041	1.61618	2.97887
107851168	-0.52796	-1.72384	-0.794905	0.41999	0.994971	1.02575	0.0272773	-0.799228	-0.234962	0.338481	-0.850808	-1.08864	0.00623582	-0.211804	-0.459785	-0.30698	0.541836	1.2951	-0.496627	-1.52002	-0.674522	2.17818	1.37302	1.48923
107851594	-0.744587	-0.92845	-0.67868	-0.37295	-0.147063	-0.928131	-0.87513	-0.729148	-0.503086	-0.540581	2.10818	-0.00118547	-0.666039	-0.90985	-0.975528	1.46436	-0.634406	1.09358	1.67017	-0.00745722	-0.482906	1.13462	1.2403	1.41396
107843815	-1.25071	-1.01482	-1.12195	0.45434	0.777114	0.364118	-1.14499	-0.565291	-0.874469	-0.298749	-0.164211	-0.448017	-0.138	-0.198357	-0.90871	0.740202	-0.037445	0.860252	-0.131585	-0.339345	-0.715864	2.11823	1.89072	2.14753
107879700	-0.396208	-0.446867	-0.444987	-0.460895	-0.46613	-0.484495	-0.32928	-0.309768	-0.339512	-0.490635	-0.431463	-0.433764	-0.483269	-0.421029	-0.0267139	-0.360669	-0.0455189	-0.140714	-0.238749	-0.400915	-0.459365	2.68048	1.95817	2.9723
107868011	-0.896656	-1.01206	-1.19559	-0.662631	-0.374105	-0.346574	-1.00631	-0.786923	-0.917827	0.36802	-0.786811	-0.0431677	-0.325262	-0.474402	-0.374294	0.0608676	1.91073	0.128529	0.458786	0.413835	0.117452	2.14477	2.11303	1.48659
107839091	-0.093477	-0.205163	-0.472161	0.594057	1.31102	0.547079	-0.918644	-0.233921	-0.221707	0.737868	-1.38292	-1.3049	-0.812191	-0.978195	0.212843	-0.24399	-0.492257	-1.16237	-0.639261	-0.360451	0.409509	1.43873	1.99706	2.27345
107878893	-0.862752	-0.931983	-1.06516	1.13502	1.15842	0.890886	-0.819043	-0.82377	-0.823219	0.0232111	-0.493486	0.245134	-0.908267	-1.06167	-0.229055	1.24658	0.555176	0.127688	-0.81219	-0.946173	-0.615133	1.37021	1.5196	2.11999
107864466	-0.835344	-0.803701	-0.933296	-0.0134791	-0.029181	-0.260509	-0.701011	-0.541993	-0.666095	-0.615325	-0.075416	-0.588025	-0.498679	-0.546819	-0.598023	0.213886	0.708807	0.638932	0.128852	-0.34016	-0.614332	2.3873	1.99013	2.59348
107847414	0.638623	-0.0921222	-0.094795	0.405004	0.423593	0.146123	-0.366168	-0.245415	-0.297818	0.737871	-1.76183	-0.884675	-0.174867	-1.16502	-0.0622945	0.357491	0.120206	0.0414211	-1.69262	-0.423453	-1.32428	2.14565	1.47805	2.09132
107860674	-0.482171	-1.24923	-1.17416	0.578141	1.45354	-0.171313	-0.584666	-1.07615	-1.12666	0.341931	-0.51381	-0.115037	-1.0718	-1.18527	-0.792631	1.22669	1.05251	-0.111249	-0.0940547	0.011812	0.255112	1.63856	1.07774	2.11215
107867150	-0.684444	-0.684719	-0.68277	-0.53046	-0.422875	-0.496659	-0.667952	-0.651609	-0.647949	-0.586406	0.548213	-0.483692	-0.528019	-0.549787	-0.64607	-0.0787094	1.24471	-0.18311	0.168102	0.172319	-0.489685	2.11129	2.37826	2.39202
107863086	-0.959908	-1.00905	-0.929153	1.17039	0.871578	1.22513	-0.613062	-0.648701	-0.75834	0.996306	-0.983626	0.258151	-0.904202	-0.854795	-0.608481	0.0917857	0.222592	-0.60832	-0.516417	-0.170299	-0.703003	1.45324	2.04744	1.93075
107867235	0.184427	1.71016	0.97276	-0.49283	0.693366	-0.337352	0.673835	1.38578	0.881205	-0.809518	0.917333	0.036222	0.28481	0.3553	0.200945	-0.995962	-0.169573	0.476843	0.713549	-1.07678	-0.0383614	-1.76005	-1.67764	-2.12847
107845498	0.96145	1.62997	1.70623	1.62825	1.1464	0.531321	0.492558	0.574888	0.207093	-0.495816	-0.317246	-0.136828	0.365467	-0.0673394	0.0845528	-0.640372	-0.669734	-1.73846	-0.0511284	0.0899866	-0.93213	-1.50699	-1.37612	-1.48601
107855965	-1.05716	-1.09658	-1.0364	0.117099	0.878607	0.223854	-0.976622	-0.930887	-0.920225	-0.583851	2.25631	-0.438078	-0.525329	-0.432496	-0.335418	0.092895	0.459837	0.541643	-0.214862	-0.146599	-0.754158	0.924269	1.77482	2.17934
107852023	1.04024	1.08129	0.802476	0.163812	0.58573	0.542883	0.731983	1.31226	0.717828	-0.0339241	-1.94459	-1.60933	0.694207	0.753213	0.517482	-0.830253	-1.15002	-0.637016	-0.139705	0.262252	1.05102	-1.51891	-0.882848	-1.51008
107872293	-0.506419	-0.49243	-0.511339	-0.352612	-0.139968	-0.466262	-0.547332	-0.452501	-0.527288	-0.524656	-0.380053	-0.549097	-0.43493	-0.391194	-0.381986	-0.154674	-0.368792	-0.0122246	0.310985	-0.283709	-0.331572	2.89894	1.8202	2.77892
107868020	-0.927869	-0.236817	-0.686767	0.926816	0.736829	1.54167	-1.22183	-1.07464	-1.29667	0.468429	-0.994065	0.165991	-0.428879	-0.408157	-0.778953	-0.0486376	0.213041	0.2689	-0.366969	-0.455135	-0.865876	2.03406	1.54353	1.892
107863382	-0.627973	-0.585833	-0.758854	0.859698	0.294363	0.154076	-0.546769	-0.596792	-0.661091	-0.26304	-1.18273	-0.966937	-0.181452	-0.31573	-0.370361	-0.564075	-0.447041	-0.348799	0.216411	0.427649	-0.385791	2.0368	2.00913	2.80514
107855112	-1.41329	-1.11038	-1.52645	-0.132933	0.164878	-0.164872	-1.3254	-0.49147	0.281904	-0.0138148	-0.666352	-0.0518944	-0.726125	-0.471309	-0.327758	0.477294	0.503714	0.264576	1.58622	-0.065375	-0.428304	1.66367	1.80135	2.17213
107840641	-0.677669	-1.02343	-0.677073	0.596429	0.508951	0.91217	-0.645561	-0.879984	-0.750664	0.591434	-0.410355	0.0557458	-1.00447	-0.894298	-0.757113	0.65269	0.472278	-0.0378923	-0.670297	-0.472008	-0.955078	1.50362	2.16699	2.39558
107840216	-0.785923	-0.889669	-0.904997	1.43025	1.66464	1.66863	-0.873335	-0.672964	-0.903712	-0.0184019	-0.796222	-0.50114	-0.501278	-0.525929	-0.849591	0.926691	-0.326437	0.204624	-0.753102	-0.430289	-0.665609	1.34996	1.52572	1.62809
107870742	-0.184967	-0.429589	-0.145033	0.509484	0.208401	0.216957	-0.468709	-1.0094	-0.55705	1.06244	-0.205988	1.02084	-1.06886	-0.899804	-0.607263	-0.371068	0.0243562	0.03689	-0.888124	-0.914003	-1.0394	1.68162	0.88684	3.14143
107863997	-0.943327	-0.928698	-0.912918	-0.396711	-0.58266	-0.501672	-0.809076	-0.744074	-0.545818	-0.0966185	-0.331072	-0.171902	-0.397052	-0.388004	-0.1609	0.0969683	0.768188	-0.0101947	0.436287	0.0810257	-0.443896	1.99615	2.12639	2.85958
107851827	0.154107	0.0190586	0.111336	-0.47541	-0.639954	-0.43078	-0.0876562	-0.28464	-0.156425	-0.117199	-1.01021	-0.703663	-0.551466	-0.536873	-0.401869	-0.187313	-0.471003	-0.0473425	-0.766887	-0.534743	-0.294388	2.10973	2.72617	2.57741
107866953	-0.351652	-0.386553	-0.334966	-0.210155	-0.331962	-0.132732	-0.332296	-0.378836	-0.397771	-0.420466	-0.403136	-0.390452	-0.331671	-0.384163	-0.411197	-0.32982	-0.406442	-0.34656	-0.411565	-0.381332	-0.412161	1.5248	2.71498	3.24612
107854610	-0.44452	-0.449899	-0.514854	-0.462202	-0.0578651	0.051762	-0.961086	-0.993061	-0.758755	0.00777347	-0.130343	-0.034727	-1.00279	-0.612112	-0.657998	1.18272	0.336431	0.465481	-0.725651	-0.453492	-0.495302	2.00438	2.37184	2.33426
107854062	1.31903	1.20295	1.01269	-0.668924	-0.861203	-0.813905	2.10642	0.922736	0.559136	-0.564481	1.15456	0.264308	0.438516	0.393857	0.48145	-0.177787	-0.667854	-0.798547	-0.290438	-0.595623	0.286324	-1.67204	-1.57883	-1.45234
107859576	0.222293	-0.015899	0.146946	-0.805983	-0.205052	-0.851134	-0.365172	0.0493645	-0.228171	-0.3611	-0.478885	-1.0371	-0.73641	-0.937543	-0.0731836	-0.218581	0.485504	-0.0545523	-0.82666	-0.618663	-0.208138	2.19243	2.71681	2.20889
107866824	-0.616472	-1.01831	-0.631291	-0.52462	-0.882228	-0.141221	0.0985501	-1.05498	-0.263315	0.723947	-0.870425	1.3527	-0.817928	-0.673644	0.247852	0.0914831	0.709903	-0.487348	-0.169428	-0.38906	-0.758676	1.86402	1.48113	2.72935
107844666	-0.50809	-0.614979	-0.867503	0.956494	0.950877	0.357187	-0.897698	-0.294976	-0.896363	1.28355	-0.917666	-0.438527	-0.688417	-0.196014	-1.07347	0.357421	-0.363289	0.778689	-0.599088	-1.05355	-0.739667	1.91611	2.39513	1.15383
107849057	-0.389114	-0.147749	-0.375111	0.313962	1.05531	0.572958	-0.894321	-0.30984	-0.47491	0.868087	-1.95124	-0.409526	-0.669705	-0.779181	-0.217295	-0.126061	-0.020092	-0.403298	-1.31469	-0.178674	-0.108704	1.57714	1.91438	2.46767
107854335	-1.13974	-1.28189	-1.14934	-0.852852	-0.899311	-1.08045	-0.985585	-0.439772	-0.503552	-0.168907	0.0698146	0.344243	-0.144776	-0.0419432	0.0207565	0.698837	1.48404	-0.0430971	0.171354	0.0541839	0.237801	1.32831	2.68759	1.63429
107843314	0.398876	1.21228	-0.0290538	0.813419	0.76311	0.7508	0.0422799	1.35972	0.351849	-0.168465	-1.2711	0.670289	0.916022	1.24131	-0.317599	-1.5095	-0.520483	-0.403107	0.134956	0.436811	0.511355	-1.86365	-2.04544	-1.47467
107851816	-0.463436	-0.460805	-0.441902	-0.333387	-0.471218	-0.143505	-0.510646	-0.456811	-0.619412	-0.500971	-0.257568	-0.493869	-0.489182	-0.584109	-0.625352	0.592194	0.0208204	0.579308	-0.715076	-0.353737	-0.585721	2.18157	2.4258	2.70701
107859188	-0.358288	-0.251883	-0.885937	-0.404868	0.187521	-0.140353	-0.699124	-0.27713	-0.948623	-0.583246	0.55474	-1.1621	-1.0861	-0.782703	-0.727885	1.1593	-0.884573	0.810529	1.20451	-0.267561	0.569198	1.58182	2.94763	0.445139
107879874	0.069673	0.0356862	0.194173	-1.22336	-0.968224	-1.3184	0.523728	2.16564	1.54632	-1.32534	2.01327	-0.141614	1.34318	0.57821	0.0596243	-0.54733	-0.0475333	-0.280457	0.389704	0.149654	-0.336518	-0.840297	-1.05338	-0.98641
107870685	-1.26365	-1.14068	-1.10153	0.103412	0.336119	0.243466	-0.850845	-0.536825	-0.868626	1.34642	-0.320177	0.451746	-0.78347	-0.179277	-0.110788	0.24757	0.638597	0.940372	-0.858309	-0.749503	-1.0703	1.88952	2.11896	1.51781
107878066	-0.53852	-1.10681	-0.905117	-0.850244	-0.660669	-0.552176	-0.5049	-1.60868	-0.645962	-0.436272	1.96419	0.648874	-0.279152	0.367779	-0.631457	1.6867	1.85336	1.80771	0.220661	-0.555763	-0.593422	0.557393	0.406253	0.356221
107867637	-0.59436	-0.592371	-0.612939	-0.56034	-0.52833	-0.579909	-0.597368	-0.474873	-0.526055	-0.543009	-0.391143	-0.439661	-0.403571	-0.413304	-0.278513	-0.29359	0.348589	-0.428455	0.575408	0.217385	-0.21455	2.07712	2.89868	2.35516
107851379	0.830996	-0.563861	0.112904	0.108639	-0.60239	1.18639	-0.810221	-1.10582	-1.01607	0.990132	-1.25067	0.411062	-0.874304	-0.837428	-0.888258	-0.296538	0.428947	-0.740658	-0.409069	-0.00857517	-0.326911	1.38245	1.86152	2.41774
107875692	1.52682	0.228834	1.68411	-0.391721	-0.913383	-0.899964	1.83545	0.041803	0.701912	0.732815	0.536001	0.0928037	0.285205	0.581941	0.55839	-0.703544	-0.896834	-0.0337556	0.0838855	0.256113	-0.0922699	-1.81625	-1.47578	-1.92257
107848177	-0.100321	-0.307883	-0.660731	0.865625	1.15067	0.47348	-0.953438	-0.334225	-0.742553	1.42792	-1.44935	-0.70342	-0.463196	-0.956493	-0.315016	-0.450843	-0.264013	-0.321549	-0.847332	-0.304684	-0.505433	2.21482	1.97869	1.56927
107867634	-0.726164	-1.01626	-0.919275	0.422323	-0.338493	-0.00354581	-0.360351	-0.772459	-0.875362	-0.132613	-0.666824	0.673463	-0.741243	-0.679584	-0.0673059	0.623548	2.02273	-0.42498	-0.545838	-0.417732	-0.657915	1.28672	1.74826	2.5689
107843578	0.324373	-0.101349	-0.210449	-1.23685	-1.15467	-0.747854	-0.279629	-0.284837	-0.323517	-0.36594	-0.687961	0.202949	-0.60317	-0.329311	-0.496504	0.284689	1.93787	-0.980361	0.350356	-0.640317	-0.490515	1.51133	1.61617	2.7055
107856873	-0.94094	-0.968411	-0.924189	-0.256547	-0.232282	-0.575457	-0.386786	-0.442444	-0.640067	-0.588681	0.512868	-0.556499	0.0278272	-0.0343049	-0.405229	0.13493	-0.030013	-0.647674	0.612711	-0.0779903	-0.651758	2.20842	2.64014	2.22238
107854200	-1.16522	-1.15476	-1.33391	-0.294611	-0.553274	-0.307482	-0.892651	-0.978137	-0.773089	0.621588	0.381875	1.69416	-0.777603	-0.28373	-0.285185	2.04571	1.52914	-0.343757	0.230962	-0.335882	-0.601702	1.22891	1.37932	0.969308
107872793	-1.32732	-0.512309	-0.983623	0.874842	1.18827	1.10588	-1.0403	-0.577451	-0.807592	0.467649	-1.20175	0.588884	-0.82384	-0.921036	-0.250778	1.60571	-0.941789	-0.974825	0.297838	-0.359453	0.564819	1.85682	1.38802	0.783338
107859341	-0.32249	1.55985	-0.61114	-0.866246	-1.07855	-1.14302	-0.612505	0.687795	0.161758	-1.24695	0.0667843	0.68787	-1.45778	-0.983414	0.392173	0.15008	1.10562	-0.72433	-0.480334	-0.631807	1.717	1.69654	1.52423	0.408874
107870892	-0.15776	0.268608	-0.96682	0.190705	-0.58944	-0.2687	-0.853586	-0.593859	-1.12091	-0.737054	1.90302	-0.35863	-0.959323	-0.87729	-0.93569	0.555841	1.57754	-0.559631	2.26121	0.364384	-0.880038	1.58887	0.590569	0.557985
107877677	0.617162	-0.100489	-0.217614	-1.36657	-0.389858	-0.855611	0.0846156	0.112294	0.114571	0.0185049	1.04592	0.79297	-0.820815	-0.949807	1.1412	-0.511033	1.22292	-1.91804	-1.1885	-1.47359	0.709654	0.734327	1.58286	1.61493
107853806	-0.370666	-0.852185	-1.08694	0.844413	0.131515	-0.438516	-0.419061	-0.765897	0.218044	1.9647	-1.26898	0.977509	-0.0915209	-0.976647	0.0808094	0.942299	-0.391968	-0.101212	-0.833244	-1.6007	-0.5685	1.2556	1.62649	1.72464
107851251	-0.438768	-0.407743	-0.534449	-0.512347	-0.492645	-0.541478	-0.53684	-0.426308	-0.461965	-0.536053	-0.415123	-0.537202	-0.427645	-0.429886	-0.355478	-0.0267479	0.0646594	-0.223095	-0.00884964	-0.093819	-0.0803285	3.24015	2.49007	1.69189
107859350	-0.719854	-1.11779	-0.985857	0.724799	0.74968	1.19563	-0.732117	-0.458816	-0.880842	0.00767997	-1.41703	-0.367677	-0.739068	-0.706618	-0.596754	0.462973	0.420863	-0.694429	-0.0954067	0.429313	-0.339451	1.94259	1.81037	2.10781
107839943	-0.277199	-0.764514	-0.735816	0.0191095	-0.448729	0.0843863	-0.548375	-0.835519	-0.714706	0.271344	0.698076	1.38735	-0.952463	-1.02005	-0.592207	0.199256	1.71651	-0.554513	-0.475282	-0.915231	-0.963079	1.72496	1.53068	2.16601
107862474	-0.782612	-0.798508	-0.758332	-0.649325	-0.793102	-0.697553	-0.646046	-0.710381	-0.665523	-0.5481	0.111462	-0.401748	-0.322377	-0.369025	-0.343398	-0.144941	2.3112	0.30708	0.470135	-0.0320552	-0.333834	1.39765	2.10102	2.29832
107851332	-1.08297	-1.19252	-1.27046	-0.551219	-0.409406	-1.1397	-0.968772	-0.582017	-0.527983	0.384404	0.0984671	0.694699	-0.208555	-0.361398	0.36612	-0.235717	2.17196	0.127347	-0.269052	0.280888	-0.517329	1.30902	1.78205	2.10216
107862100	-0.117459	-0.699974	-0.203253	-0.644606	-0.468205	-0.660776	0.0957831	-0.215091	0.00130405	-0.182233	-0.381493	0.270147	-0.614178	-0.677753	0.504882	-0.0460722	-0.031049	-0.607612	-0.537217	-0.323853	-0.704522	0.881648	1.34433	4.01725
107848516	-0.713195	-0.715433	-0.715746	-0.663355	-0.659956	-0.660926	-0.671817	-0.642588	-0.577918	-0.119817	-0.0959456	-0.174757	-0.366029	-0.267686	0.552718	-0.26828	0.750358	-0.275986	-0.33882	-0.0964872	-0.318239	1.91143	3.13458	1.9939
107864656	-0.55178	-0.895893	-1.02003	0.19777	0.820292	-0.446804	-0.382877	0.149112	-0.39117	-0.120479	-1.32362	-1.4741	-0.734824	-0.649035	0.258486	0.265844	0.353953	-0.208619	0.159819	0.128102	-0.487317	1.4645	2.58264	2.30603
107862822	-0.732474	-0.771657	-0.741417	-0.304519	-0.245191	-0.298447	-0.734352	-0.747655	-0.708018	-0.125755	0.91676	-0.200671	-0.644415	-0.662562	-0.736607	0.226524	1.12396	1.15499	-0.605838	-0.691777	-0.743824	2.0822	1.99721	2.19354
107866711	-0.639338	-0.645299	-0.693186	-0.397055	-0.450181	-0.539153	-0.395111	-0.417908	-0.126642	-0.503015	-0.0479024	-0.275253	-0.52556	-0.560903	0.0114709	0.253421	0.14141	0.390923	-0.268011	-0.503035	-0.690849	0.987359	2.50426	3.38956
107845465	-0.338144	0.772776	-1.20768	0.523212	0.588784	1.71321	0.608714	2.07184	0.194122	0.371584	-1.58847	-0.198668	0.983252	0.660698	-0.686542	-0.84894	-0.910131	-0.505749	1.07342	0.32856	0.104946	-0.892404	-1.13154	-1.68686
107873032	0.373778	-0.438038	-0.745867	0.239967	0.182925	1.40099	-0.1317	0.0257255	-0.425883	1.43154	-1.79553	-0.543867	-0.601766	-0.673116	-0.647626	-0.445935	-0.438055	-0.567273	-0.8608	-0.803674	-0.187097	1.70856	1.63298	2.30976
107839889	-1.06343	-1.18315	-1.27297	0.24902	0.588416	0.0370403	-1.18543	-0.429217	-1.30479	-0.0255365	-0.293953	-0.45974	-0.153714	-0.443246	-0.500235	0.582017	0.586054	-0.536402	0.80856	0.0509059	-0.0515981	1.48488	1.84285	2.67368
107863911	1.26476	1.33657	0.436795	-0.0107986	-0.552326	-0.340818	0.840911	0.141085	0.287532	0.650555	1.68212	0.52906	0.482598	0.733396	-0.337117	-1.16613	-0.927417	0.0386647	0.335085	0.0352238	0.343378	-1.90311	-2.16822	-1.73181
107846826	-0.829131	-0.734185	-0.977534	0.102836	0.519409	0.194699	-0.869736	-0.524934	-0.831033	-0.722745	0.24389	-0.316352	-0.811327	-0.62565	-0.874516	0.877053	1.15607	0.0116579	-0.364983	-0.682342	-0.260256	2.4358	2.07416	1.80914
107872863	-0.248915	-0.200056	-0.605862	0.0780255	0.302108	-0.3101	-0.533738	0.375232	0.220523	-0.718232	-0.523659	-0.456653	-0.913521	-1.01611	-0.245167	0.249711	-0.419922	-0.905285	-0.372122	-0.275569	-0.51157	2.19816	1.74793	3.08478
107848324	0.826207	1.16857	2.08576	0.625168	0.216899	0.638065	1.24977	0.349445	0.168807	0.481	-1.1842	0.746338	0.632159	0.227731	-0.252517	-0.807242	-1.26268	-1.24277	-0.498531	0.360734	-0.0169662	-1.1114	-1.97592	-1.42443
107867588	-0.760194	-0.272715	-0.254821	0.48399	0.323878	0.839168	0.0877075	-0.4324	0.0553461	1.80085	-1.6208	-0.302948	0.221257	-0.129874	-0.454758	-1.11824	-0.618187	-0.981527	-0.319106	-0.570685	-1.36449	1.94325	1.39814	2.04716
107868296	-0.86589	-0.893295	-0.879743	-0.398027	-0.387174	-0.256848	-0.837417	-0.875628	-0.77893	0.389924	1.8073	0.923954	-0.748179	-0.713446	-0.617168	0.549284	1.83002	-0.452171	-0.121007	-0.646164	-0.637545	1.97695	0.84452	1.78668
107860244	1.18618	1.0055	0.64025	-0.939177	-0.977968	-1.00217	0.200437	-0.114407	0.455293	-0.84177	2.10987	0.730749	-0.246098	-0.29447	1.31626	-0.606851	-0.219426	-0.849301	1.11121	-0.671107	1.55954	-1.09037	-1.33009	-1.13209
107857570	-1.34991	-0.459436	-0.943681	0.216171	0.119162	-0.067278	-1.14527	-0.989673	-1.15009	0.475941	-0.937529	-0.0578077	-0.0127246	-0.74414	-0.50299	0.459623	0.52268	1.104	-0.202758	0.132464	-0.386888	2.45363	1.2132	2.2533
107847358	-0.754984	-0.603543	-0.640497	-0.777502	-0.384806	0.324474	0.157837	-0.83106	-0.532414	-0.415502	1.58462	0.776626	-1.3046	-0.842013	-0.130818	0.375586	2.57131	-1.46166	0.444097	0.079069	-1.01666	0.869845	1.40508	1.10752
107843439	-0.824652	-0.669642	-0.639333	-0.75981	-0.770013	-0.97754	-0.663628	-0.595334	-0.433713	-0.646825	0.1117	-0.581128	-0.22475	-0.489643	-0.239975	0.271815	1.27248	0.146817	0.555612	0.409061	-0.712348	2.19974	1.57283	2.68828
107851019	1.8674	0.777006	0.573476	0.990275	0.875087	1.81243	0.0608602	0.674955	-0.538869	-0.128283	-0.155091	-0.826675	-0.228763	-0.200943	0.472104	-0.735197	-0.675885	-0.240664	0.118405	-0.471985	1.18491	-1.84607	-1.76881	-1.58967
107862265	-0.690158	-0.602993	-0.780441	-0.699478	-0.383837	-0.378728	-0.415674	-0.661241	-0.540405	-0.616792	0.0522637	-1.09323	-0.206852	-0.121732	-0.40409	-0.546115	0.969863	-0.20441	0.487451	0.626187	-0.552964	2.07495	1.81626	2.87217
107859144	-0.431574	-0.489306	-0.440212	-0.301928	-0.430474	-0.361195	-0.561112	-0.545022	-0.524472	-0.204579	0.204979	0.0388753	-0.509179	-0.528897	-0.244205	-0.322238	0.116792	-0.0693902	-0.409534	-0.492353	-0.540573	2.99885	3.11809	0.928656
107851093	1.37374	1.30227	1.40452	-0.804041	-1.13796	-0.00686385	0.565465	0.552304	0.461323	-1.37189	1.15957	1.04325	0.374184	0.513159	0.575338	0.0411413	-0.797168	-0.967859	0.361623	-0.954247	0.710873	-1.4903	-1.60357	-1.30488
107855321	-0.921118	-0.995112	-1.00463	-1.09512	-1.03627	-1.09598	-0.603074	-0.490996	-0.462628	-0.218417	0.590142	0.430837	-0.571538	-0.586267	2.5447	-0.115167	1.89825	0.216254	0.118983	0.0606428	-0.249902	1.02479	1.11258	1.44904
107840531	-1.00905	-1.1623	-1.02187	-0.188253	-0.273927	-0.18446	-0.904792	-0.834562	-0.71909	0.806318	1.02387	0.277043	-0.608693	-0.391813	-0.827203	0.218656	1.82144	0.75121	-0.141355	-0.635216	-1.02183	1.75091	1.08946	2.18551
107861893	0.205119	0.364574	0.51097	-0.931425	-1.14269	-1.0597	0.896998	-0.0241479	0.828421	-0.774039	2.82366	-0.371836	0.490902	0.565155	1.25885	-1.04177	0.785232	-0.429712	0.0979088	0.527752	0.163657	-1.15897	-1.15997	-1.42495
107863311	-1.10741	-1.16016	-1.1019	0.00530608	0.475212	-0.636891	-1.08345	-0.433348	-0.742681	-0.414827	0.598717	-0.86501	-0.18919	-0.250911	-0.529926	0.0634601	2.19549	1.26925	-0.50146	0.178795	-0.583804	1.24113	1.89896	1.67466
107862403	-0.514666	-0.654136	-0.50749	0.425566	-0.0861526	0.38023	-0.627628	-0.789186	-0.642855	0.345444	-0.667525	-0.518951	-0.718848	-0.670364	-0.598733	0.241743	0.880632	0.146201	-0.690377	-0.514139	-0.751312	1.26574	3.13102	2.13578
107878043	-0.915176	-0.995867	-0.955178	-0.915771	-0.883874	-0.97956	-0.698863	-0.42602	-0.442728	0.0125732	0.00313851	0.0792824	-0.110387	-0.27444	0.500924	-0.457602	1.66754	0.326593	-0.0878703	0.161961	-0.694465	1.46865	2.16853	2.44861
107856268	-0.0816811	0.712535	-0.070903	0.585631	0.540322	0.720562	-0.387315	0.228682	0.299254	0.257578	1.95529	-0.149181	0.394933	0.260996	0.636041	0.295579	-0.870413	-1.36455	1.46757	-0.148743	0.538114	-2.07072	-1.82883	-1.92075
107867845	-0.327002	-0.571419	-0.153499	1.33745	1.47441	1.89353	-0.0371318	0.510103	0.240875	-0.35938	-1.25605	-0.180083	1.11059	0.791788	0.578935	-1.45571	-0.48835	-1.61296	0.256794	1.61346	-0.638077	-1.21179	-0.966381	-0.550113
107859446	0.807349	1.16993	0.845783	0.657069	0.00236162	-0.29741	1.50776	1.94311	0.0606604	-0.497783	0.278899	-0.782329	0.444704	0.168575	0.714736	-0.844882	-1.16592	0.495123	0.0710155	-0.606998	0.178794	-1.46554	-1.42101	-2.264
107847779	-1.04755	-1.10367	-1.05379	-0.608398	-0.464798	-0.580586	0.0259143	-0.88971	-0.89372	-0.414271	0.239559	1.50537	-0.530981	-0.447164	-0.668579	0.247113	2.00117	1.53379	0.0714211	-0.415557	-0.759264	0.882107	1.66	1.71159
107846831	-0.633061	-0.603175	-0.676668	-0.481501	-0.460148	-0.556605	-0.621291	-0.546345	-0.503296	-0.571926	0.349579	-0.525788	-0.410779	-0.528075	0.139646	-0.257807	1.48898	-0.0589296	-0.426271	-0.314704	-0.53562	1.56214	2.92169	2.24995
107857602	-0.671499	-0.825908	-0.810102	0.453167	0.3612	0.432555	-0.910152	-0.599475	-0.774354	0.887532	0.0264786	-0.0742531	-0.746188	-0.888713	-0.815438	0.288588	0.746786	0.423031	-0.696086	-0.828637	-1.16326	2.0709	2.04577	2.06806
107870313	-0.550655	-0.629499	-0.652985	-0.433176	-0.416747	-0.49182	-0.572192	-0.559128	-0.598564	0.122708	-0.292926	0.280209	-0.667599	-0.654359	-0.388193	0.181184	0.884074	-0.0163401	-0.493985	-0.398296	-0.675941	1.63697	2.37468	3.01258
107854550	1.3809	0.93043	1.44627	-0.289236	-0.334721	-0.433394	1.34982	0.662403	0.638012	-0.670229	1.16445	-0.256272	1.30459	0.435761	0.424254	-1.21836	-0.311198	-0.66538	-0.187202	-0.186202	0.0225867	-1.67459	-1.80721	-1.72547
107854384	-0.704176	-0.792407	-0.854929	-1.54736	-1.09447	-0.632595	1.02979	-0.348966	-0.0665623	1.66174	-0.197127	-0.739318	-0.845659	-1.47987	-0.0396291	1.71285	0.148145	0.67454	0.624906	0.023469	-0.440524	0.919088	1.94443	1.04462
107860347	-1.21117	-1.42686	-0.917674	-0.0179131	-0.288919	-0.105455	-0.603241	-1.23853	-0.870715	-0.120235	0.643128	0.630606	-0.515767	-0.240238	-0.830566	0.228686	1.63749	0.319591	0.0219422	0.633864	-0.967555	1.12516	2.3405	1.77388
107863872	-1.08111	-1.16196	-1.08007	-0.183941	-0.179392	0.200929	-0.936376	-0.770395	-0.786044	0.853618	-0.854468	0.328223	-0.704193	-0.556852	-0.396634	0.685803	1.43717	0.0673577	-0.369045	-0.172504	-0.274206	1.76199	2.10722	2.06487
107857121	-0.638033	-1.01115	-0.627835	-0.195858	0.0328437	0.0931812	-0.126031	-0.829787	-0.900742	1.15413	-0.0568175	1.37158	-1.07327	-1.05189	-0.731782	1.11917	0.155194	-0.856341	-0.324993	-0.256313	-0.575202	2.05671	0.769763	2.50347
107862819	0.992289	-0.488304	-0.738431	-0.620014	-0.314584	0.19316	0.77204	1.52517	0.614868	0.216292	1.25596	0.0977148	-0.0339227	0.235845	1.12695	1.00265	-0.800541	-0.775584	0.345041	-0.0204197	0.976328	-1.23624	-2.51181	-1.81447
107862411	-0.699644	-0.656868	-0.752241	-0.518543	-0.577745	-0.463011	-0.727565	-0.718589	-0.680839	0.513827	-0.282766	0.63524	-0.617364	-0.598977	-0.602334	0.315119	0.752144	0.296038	-0.401653	-0.431117	-0.598801	1.90867	2.76637	2.14065
107867484	-0.498032	-0.49721	-0.496214	-0.299727	-0.241007	-0.36856	-0.491172	-0.452526	-0.487374	-0.374801	-0.379641	-0.264055	-0.469119	-0.473158	-0.500624	0.205371	0.0978188	-0.297169	-0.491013	-0.383259	-0.472777	2.34213	2.67694	2.61518
107870094	1.01609	-0.363887	-0.157276	0.515281	0.404246	1.00275	0.0374985	0.269141	0.173966	2.15645	-1.94398	-0.648805	0.352971	0.167112	0.361951	-0.000966611	-1.10231	-0.935259	1.4464	1.10532	0.173813	-1.275	-1.00214	-1.75338
107843260	0.321739	0.844992	1.66439	-0.111905	-0.0711674	0.166181	0.263771	1.6061	0.584679	-0.0686762	-1.44381	-1.00311	1.09616	0.990636	-0.0675118	-0.899373	-1.38082	0.825414	-0.263177	0.166378	1.10619	-1.14548	-1.62433	-1.55727
107843767	-0.668809	-0.83178	-0.840077	-0.859666	-0.806329	-0.932158	-0.207122	-0.465209	-0.314881	-0.664619	-0.0895961	-0.364855	-0.152477	-0.13887	0.41744	-0.0150266	3.54647	-0.0178242	-0.143748	0.146122	-0.316696	0.92756	1.75672	1.03543
107877828	0.684686	1.01365	1.0566	0.943008	1.36049	1.54314	0.639338	0.804906	0.860672	-0.0871649	-0.795897	-0.481314	0.197089	0.360071	0.731001	-1.2871	-1.11475	-0.759009	-0.607365	-0.252385	0.0787199	-1.69279	-1.65795	-1.53765
107843994	-0.683327	-0.446029	-0.189331	-0.585638	-0.501725	-0.549374	-0.632962	-0.640372	-0.585964	-0.556358	0.439145	-0.691743	-0.241426	-0.414249	-0.922027	-0.0846797	1.44053	1.14379	-0.905074	-0.280551	-0.444423	1.65923	2.46164	2.21091
107860415	-0.376193	-0.472778	-0.618926	1.369	1.1689	1.35537	-0.92047	-0.718296	-0.812742	0.2454	0.376085	-0.16393	-0.801244	-0.850493	-0.976449	-0.379044	0.0171733	0.0741154	-0.821504	-0.900438	-0.956868	1.53109	2.56169	1.07055
107879788	-0.891192	-0.878405	-0.895679	-0.598004	-0.634124	-0.741972	-0.759141	-0.677433	-0.699072	-0.256912	0.388567	-0.179036	-0.717025	-0.61545	0.480088	-0.107644	1.8162	0.410087	0.169521	-0.249901	-0.416586	1.89686	1.60539	2.55087
107868496	1.05831	0.558827	0.826759	0.60682	0.651191	1.58631	0.707409	0.864074	0.547446	0.821604	-2.46877	-0.138029	0.373158	0.022811	-0.174227	-0.448529	-1.29569	-0.883133	-0.506261	-0.442119	1.16174	-1.11053	-1.74519	-0.573991
107850875	1.40657	1.0168	2.02874	0.440585	0.306431	0.464785	0.558749	0.492986	0.578672	-0.244011	-0.650308	-0.57655	0.874837	1.29493	0.0285158	-0.976991	-0.983356	-1.08982	-0.471972	-0.384127	0.574271	-1.41555	-1.48426	-1.78992
107838809	-0.38441	-0.508684	-0.567424	-0.309651	-0.22493	-0.13951	-0.107131	-0.477554	-0.370784	-0.0583455	-0.807918	0.222146	-0.630054	-0.6596	0.0219172	-0.0801918	0.0691018	-0.655347	-0.604465	-0.497267	-0.700022	2.41065	2.6654	2.39407
107845826	-0.50134	-0.885167	-0.572302	-0.576032	-0.649295	-0.218387	-0.559975	-1.49521	-0.132787	1.36998	-0.164864	0.536975	-0.903913	-1.07346	-0.00434711	0.128615	0.685975	-0.982335	0.514521	0.135174	-0.578002	2.25778	1.50818	2.16023
107876859	2.26319	0.722311	0.733805	-0.912226	-1.43648	-0.62835	0.783533	-0.614038	-0.103385	0.704705	0.0788579	1.55643	-0.220914	0.772956	0.699562	-0.315383	0.0917357	-0.249714	-1.00138	0.30056	1.03397	-1.39139	-1.23103	-1.63733
107873494	-0.79598	-0.786263	-0.77699	0.0300798	0.150056	0.132001	-0.770797	-0.781771	-0.795244	-0.335831	1.29861	-0.624245	-0.607143	-0.738304	-0.731947	0.123601	0.939695	0.0342086	-0.266838	-0.369896	-0.758938	1.91374	2.06584	2.45236
107860355	-0.491196	-0.575681	-0.602643	-0.413115	-0.445529	-0.513379	-0.592395	-0.64068	-0.60947	-0.390648	-0.594798	-0.377652	-0.436908	-0.580758	-0.262546	-0.260184	0.542212	-0.314259	0.405944	0.174535	-0.37523	2.23833	2.27622	2.83984
107878782	-0.806374	-0.851028	-0.937711	-0.425597	-0.653547	-0.8813	-0.779613	-0.995987	-0.723348	-1.38439	0.760251	-0.315157	-0.551866	-0.379981	-0.14433	0.0558972	1.89179	0.323651	2.46632	0.701064	0.401205	0.650464	1.25481	1.32479
107870979	-0.404903	-0.251334	-0.593351	-0.273666	0.146115	-0.653526	-0.177398	-0.419729	-0.768653	-0.639459	0.971878	-0.482401	-0.424328	-0.405424	-0.929607	-0.0836305	0.00732981	0.462224	-0.703804	-0.670272	-0.7358	2.61318	2.11929	2.29727
107867943	-0.675425	-1.65065	-0.71645	0.440697	0.47257	0.859022	-1.06203	-0.554981	-0.88104	2.44469	-0.861548	-0.629104	-0.721944	-1.13762	-0.0626386	-0.165897	-0.0843497	0.440074	-0.293151	0.798835	0.0263824	0.745056	1.90987	1.35964
107839852	-0.810806	-0.830501	-0.773307	-0.276239	-0.154775	-0.290235	-0.55496	-0.721757	-0.684412	0.352623	-0.0502019	0.298991	-0.664769	-0.690639	-0.723667	0.324985	0.965921	0.331831	-0.613127	-0.486308	-0.756606	1.97369	2.41279	2.42148
107841956	-0.816545	-0.865624	-0.64015	-0.556421	-0.176548	0.0838432	-0.130038	-1.00507	-0.699429	0.241556	0.706867	0.886096	-0.793929	-0.777541	-0.739942	0.589833	1.50662	-0.290942	-0.745294	-0.581707	-1.03809	1.86617	1.74058	2.2357
107861788	-0.289481	-0.785059	-0.600022	0.68147	1.2779	0.864648	-0.866422	-0.31031	-1.35548	-0.67207	-0.561757	-1.28594	-0.20944	-0.357806	-0.634491	-0.401157	-0.484328	0.890035	0.193253	-0.153202	-0.767444	1.71071	1.75922	2.35718
107862352	-1.17476	-1.36496	-1.18478	-0.334545	0.035698	-0.0807186	-0.630868	-0.998929	-0.589713	-0.504708	0.38865	-0.234287	-0.810035	-0.411354	-0.410733	0.477355	0.360164	0.876754	1.30207	-0.185972	-0.414858	1.42306	2.26863	2.19885
107870854	-1.32843	-0.618078	-1.02575	0.0449195	0.197318	-0.377719	-0.816004	-1.17592	-1.07232	-0.13599	2.3649	-0.0589999	-0.262004	-0.177606	-0.74633	0.755439	1.26399	-0.150907	0.167268	-0.270852	-1.05341	1.35948	1.41924	1.69777
107863897	-0.955708	-1.23501	-1.09034	-0.856426	-0.862821	-1.02649	-0.519267	-0.821863	-0.774544	-1.08264	1.09082	0.268355	-0.147391	0.171879	0.677863	-0.249272	1.44872	-0.560904	1.42293	1.40627	-0.276012	1.15902	0.907534	1.9053
107855106	1.02143	0.580914	0.659494	1.1275	0.323204	0.935525	1.68964	1.00597	1.41433	0.654662	-1.15143	-1.01123	0.571968	0.272041	-0.558097	-1.30164	-1.21219	-0.667323	-0.0388441	-0.124051	-0.024685	-1.56605	-1.53998	-1.06115
107839393	-0.736322	-0.84315	-0.457473	-1.09113	-1.25975	-1.40877	-0.195031	-0.81722	-1.04244	-0.314663	0.939702	0.0515315	-0.556274	0.156492	-0.649475	-0.00867052	1.98412	1.86624	0.154442	0.392803	-0.178433	1.12572	1.74053	1.14722
107856354	0.856751	1.21781	0.700968	0.0125254	0.446045	-0.177758	0.78235	1.11903	0.948369	-0.912706	-2.08331	-0.982124	1.11773	0.905593	0.0224687	0.0631399	-1.80807	0.562499	-0.508983	0.137399	1.05107	-1.41721	-1.03537	-1.01821
107852885	-0.829445	-0.776638	-0.482019	0.618172	0.704493	0.867736	-0.493815	-0.0537067	-0.582218	0.886191	-1.32539	0.0171825	-0.487932	-1.04329	-0.74792	0.173738	-0.578649	1.41426	-0.87864	-0.790963	-0.852851	1.48747	2.61243	1.1418
107877995	-0.108383	0.201142	-0.589464	0.26798	1.12028	1.61839	-0.743345	0.0123907	-0.34465	1.27909	-1.49282	-0.440789	0.416599	-1.18718	-0.96794	-0.351754	-0.0617724	-0.0604126	-1.66186	-0.989417	-0.447351	1.4467	1.05146	2.03311
107855191	-0.382762	-0.456848	-0.680864	-0.0879866	0.516542	-0.0612404	-0.518865	0.0595426	-0.587218	-0.461099	-1.69651	-0.928121	-0.355855	-0.396587	0.383255	-0.416123	-0.12764	-0.992856	0.225966	-0.0749978	0.339905	1.81283	2.04092	2.84661
107861585	0.690586	0.876153	1.41212	0.424863	0.303225	-0.566357	0.997347	1.97429	0.763527	-0.365627	-0.334433	-1.1908	1.07902	0.370463	0.241417	-1.1791	-1.27138	-0.522226	-0.320945	0.860383	0.170775	-1.47865	-1.35561	-1.57904
107872290	-0.85572	-0.857113	-0.857908	0.614962	1.18707	0.686559	-0.837707	-0.837837	-0.844834	0.6068	-0.336408	-0.0140148	-0.79817	-0.795703	-0.777304	0.134182	0.16976	0.821021	-0.745795	-0.732053	-0.812089	1.92355	1.81121	2.14754
107839675	0.458538	-0.200628	0.535482	-0.563897	-0.767269	-0.148147	1.73349	0.0541721	1.2104	1.68288	-0.504619	0.876102	1.33877	0.865374	0.336272	-1.12643	-0.798973	0.275202	-0.53016	0.501558	-0.359458	-1.557	-1.65518	-1.65648
107854309	-1.1299	-1.10374	-1.07405	-0.912849	-0.863359	-0.969139	-0.5668	-0.889532	-0.875516	-0.227816	-0.331072	1.50576	-0.259538	-0.19562	0.419626	0.657164	1.29574	0.18025	1.22131	0.00994415	-0.588547	2.0371	0.794777	1.8658
107879998	0.826043	1.17811	1.14249	-0.830943	0.0563717	-1.79377	-0.657708	0.0174216	0.342612	0.410798	2.02081	-0.624517	-0.579935	0.429299	1.19305	-0.810854	-0.045812	0.69865	0.993956	-0.44113	0.499449	-0.712801	-1.60422	-1.70739
107876011	1.77466	1.19296	0.987715	0.207679	-0.14357	0.501831	0.752516	1.04641	1.13934	-0.416882	-0.355223	-0.00591753	-0.429929	0.0431686	1.10863	-0.18222	-1.09179	-1.90772	0.278568	-0.205346	0.358688	-1.74284	-1.26247	-1.64827
107852103	-0.388086	-0.607972	0.23857	-0.107987	-0.413675	0.50104	0.545432	0.848901	0.320771	0.535787	0.944065	-0.196169	2.18628	2.24338	-1.66287	-0.176213	-0.807125	0.65789	0.102036	0.0279774	-1.44591	-1.3997	-0.935652	-1.01077
107868146	-0.765352	-0.916999	-1.18205	-0.652742	-0.0525041	-1.24767	-0.649876	-0.539056	-0.571418	-0.35045	0.0565596	-0.328221	-0.107249	-0.291397	0.918359	-0.648733	1.41244	1.86458	0.00144511	0.462426	-1.01848	0.476882	1.86449	2.265
107875742	0.392067	0.332892	0.289493	-0.889988	0.25283	-0.74257	1.19366	-0.157903	1.04493	-0.319457	3.02108	-0.418658	0.391501	0.165485	-0.438506	0.340236	-0.642644	-1.42145	0.222252	-0.353024	1.35009	-1.1418	-1.12569	-1.34481
107854385	-0.887373	-1.42871	-0.997627	-0.841815	-0.625089	-0.899821	-0.658974	-1.21293	-0.904145	0.600655	-0.454475	0.257402	0.469507	0.444522	0.134513	-0.229964	1.58581	-0.262972	0.616224	0.676327	-0.704883	1.68841	1.66823	1.96718
107873195	-0.790225	-1.02107	-0.646009	-0.722365	-0.93346	-0.559451	0.166484	-0.48222	-0.69752	-0.956161	0.258688	0.444959	-0.210706	0.190438	-0.432519	-0.198387	2.08244	1.21561	-0.040643	-0.216354	-1.13254	0.70243	1.14572	2.83284
107871147	-0.990584	-0.693806	-1.14794	-0.0698962	0.158977	-0.126896	-1.0623	-0.730288	-0.197668	-0.507764	-0.589865	-0.480395	-0.42598	-0.556759	-0.548085	1.13074	-0.0756725	1.26246	0.548729	0.306472	-1.12367	2.24242	2.34725	1.33052
107870472	0.547872	0.215849	0.608359	-0.599866	-0.462029	-0.584567	1.13884	-0.178619	0.226068	-0.314639	-0.899358	-0.0617907	-0.850178	-0.80476	0.557881	-0.556941	-0.827665	-0.760776	-0.95204	-0.812539	-0.779552	1.47735	1.81452	2.85858
107872774	-0.937368	-0.83131	-0.58127	-1.35716	-1.34848	-1.32789	-0.459757	-0.353308	-0.311219	0.203042	0.679135	0.717464	-0.283389	-0.125926	-0.104536	0.616692	2.57752	1.03355	-0.315055	-0.661302	-0.637737	1.07878	1.0589	1.67062
107847870	-0.673535	-0.949651	-1.36576	-0.158446	0.530887	-0.521096	-1.4153	-0.76042	-1.04421	-0.665489	1.07941	-0.786365	0.53882	0.50074	-0.872831	0.375605	2.57342	1.43452	-0.197098	0.0705417	-0.575145	0.80569	1.02534	1.05037
107858931	-0.89902	-0.954917	-0.954098	-0.694956	-0.667415	-0.743147	-0.844018	-0.47577	-0.551167	0.30811	0.166575	-0.455739	-0.643166	-0.540144	-0.0210995	-0.131816	1.15034	2.49881	0.0143012	-0.489416	-0.151629	1.48153	1.58037	2.01749
107877297	-0.106347	-0.57366	-0.468246	-0.631944	-0.664133	-0.31157	-0.384691	-0.958188	-0.443561	0.824047	-0.119201	0.721156	-1.03931	-1.15067	-0.169151	0.18885	0.541288	1.15889	-0.13388	-1.00487	-1.09154	2.58288	2.25051	0.983337
107876824	-0.773948	-0.864798	-0.872731	-0.920571	-0.72486	-0.869846	-0.786777	-0.468253	-0.584522	-0.543357	0.332333	-0.204652	-0.665118	-0.560824	-0.317321	0.589026	2.19507	1.6418	0.0409763	-0.110335	-0.46286	1.87588	1.54266	1.51303
107849571	-0.69518	-0.629371	-0.645413	-0.468103	-0.453827	-0.375835	-0.692521	-0.696683	-0.582359	0.0632907	0.277644	-0.0135755	-0.434732	-0.494492	0.429918	-0.614607	1.4872	-0.09264	-0.512106	-0.607164	-0.745027	1.25804	2.45853	2.77902
107840332	-0.52106	-0.494337	-0.511279	-0.368144	-0.250709	-0.30843	-0.477116	-0.430441	-0.429459	-0.445941	-0.311972	-0.427683	-0.439805	-0.392289	-0.381081	-0.26686	0.0377556	-0.236869	-0.196923	-0.385266	-0.35377	2.37718	3.18717	2.02733
107873343	-0.878107	-0.685656	-1.24106	-0.245626	0.110719	-0.318249	-0.880953	-0.425606	-0.656935	-0.522808	0.417549	-0.467961	-0.321265	-0.636567	-0.519849	0.194995	1.39899	0.43785	-0.372147	-0.420902	-0.458467	1.62704	2.523	2.34201
107848390	0.381152	-0.180355	1.09439	-0.737478	-0.519064	-0.269006	1.47132	-1.2401	1.15773	-0.0222471	-0.779842	1.3655	-0.151027	-0.801048	-0.512727	-1.1961	1.15878	-1.02882	-0.724907	-0.493801	-1.5022	0.317754	1.30799	1.90411
107861639	-0.753904	-0.758007	-0.743573	-0.622442	-0.451515	-0.401915	-0.678091	-0.766646	-0.734792	0.846744	-0.27798	1.00114	-0.626205	-0.652995	-0.620668	0.120572	0.853286	1.63335	-0.739053	-0.517934	-0.74095	1.27811	2.37639	1.97707
107872417	-0.884983	-0.916786	-0.892681	-0.915877	-0.924007	-0.901307	-0.568206	-0.674878	-0.477723	-0.0386546	-0.0845899	-0.0675704	-0.460418	-0.438252	1.0521	0.240389	1.58776	0.139018	-0.536589	-0.189467	-0.0850017	1.76416	2.56728	1.70628
107869044	-0.679224	-0.580531	-0.947647	0.423197	2.12956	0.123554	-0.660408	-0.241089	-0.704496	-0.759259	-0.785966	-1.222	-0.117043	-0.512489	-0.505092	-0.0326751	0.5016	-0.458688	-0.497686	-0.0837642	0.0792484	1.53338	1.19274	2.80477
107850879	-0.228889	0.96777	1.27132	1.02818	1.5655	0.890372	-0.71691	0.353863	0.552084	0.648911	-1.48592	-1.57861	0.239707	0.712795	-1.00937	-1.26036	-1.38656	0.803026	1.08246	0.59788	-0.986765	-0.26267	-1.12341	-0.674393
107867349	0.361154	0.980332	0.477599	-1.00526	-0.911885	-0.839085	0.639409	-0.416479	-0.026541	-0.740638	1.87211	-0.0895557	0.686159	0.800547	-0.54146	0.79763	1.36453	-0.932932	1.6694	0.654491	-0.459806	-1.43758	-1.37361	-1.52853
107840287	0.598733	1.26971	0.663475	-0.441658	-0.0716281	-0.752202	0.926845	0.851396	0.769246	-0.44566	1.13266	0.366973	0.870345	0.469055	0.751205	-0.908672	0.206114	-0.825022	-0.4382	0.330234	0.671292	-2.27436	-1.63917	-2.0807
107871421	-0.928261	-1.18984	-1.49561	-0.364107	0.187465	-0.070314	-1.10955	-1.06451	-1.12897	-0.505085	-0.0384099	0.386581	-0.359541	-0.759453	0.0172819	1.44726	0.436626	0.346232	0.660215	-0.447924	0.553135	1.33532	1.87076	2.22069
107855447	-0.888651	-0.902575	-0.962589	-0.575449	-0.393731	-0.563642	-0.826238	-0.516369	-0.77588	-0.0629056	0.0271922	0.615595	-0.503256	-0.3884	-0.326343	0.509717	2.70157	0.0226676	-0.534322	-0.220082	-0.609456	1.57425	1.82383	1.77506
107873388	-0.458397	-0.36975	-0.455967	0.31482	0.341049	0.087578	-0.398182	0.487943	0.952626	-0.22445	0.912819	-0.380989	1.75602	1.49692	-0.81989	-0.0156794	-0.0351234	2.22	0.388997	-0.0941323	-1.47272	-0.803989	-1.94558	-1.48392
107858889	-1.08987	-1.14851	-1.15359	0.336911	0.126405	0.0549868	-0.778468	-0.676422	-0.808625	-0.514242	-0.0468643	-0.324848	-0.136169	-0.430226	-0.764794	0.157394	-0.413432	1.75264	0.668073	0.440848	-1.01205	1.9887	1.61238	2.15977
107867571	-0.558806	-0.54098	-0.554284	-0.371695	-0.216075	-0.465194	-0.536054	-0.453171	-0.361177	-0.527875	-0.111597	-0.293876	-0.505097	-0.501276	-0.527208	0.862374	-0.0630489	-0.195595	-0.430766	-0.51021	-0.500614	2.72423	2.66705	1.97095
107839348	1.09037	0.856365	1.10445	-0.554762	-1.12554	-0.71195	0.96186	0.785952	0.362885	-0.406498	0.996054	0.736086	1.7256	1.57565	-0.483573	-1.3666	-0.249233	-0.956014	-0.351437	0.0424471	0.0716873	-1.35001	-1.62204	-1.13174
107842639	-0.8928	0.759681	-0.788761	0.845566	1.67226	0.579904	-0.340999	0.603062	0.585044	1.07575	0.22196	-2.41898	0.56467	0.601991	-0.595287	-0.693878	1.14352	-0.583093	0.774721	0.311631	0.0670998	-0.439976	-2.05332	-0.99976
107864919	-0.0354454	-0.286938	-0.648029	-0.577628	-0.818858	-0.798093	0.566537	0.861036	-0.0876392	-1.28531	-0.821174	-0.859106	-0.164714	0.335053	0.0218749	-0.423257	-0.775938	0.733696	0.531468	-0.96752	-0.662351	1.28298	2.60418	2.27518
107865803	-0.409289	-0.367446	-0.563779	-0.496568	-0.281258	-0.745639	-0.599691	-0.466699	-0.721512	0.0165679	0.0420655	-0.497708	-0.71056	-0.736847	-0.295305	0.315447	1.43397	2.85649	-0.808993	-0.790997	-0.694459	1.61631	1.22622	1.67969
107843749	0.901523	0.572255	0.454208	-0.193053	-0.440019	-0.692696	1.8079	1.31718	0.231996	0.929643	0.812476	-0.444359	0.476269	0.430474	0.667419	-1.03339	-1.00117	0.29663	0.370997	-0.0114921	0.263334	-2.08582	-1.8317	-1.7986
107870811	0.905863	1.59328	0.370222	0.650509	1.14151	0.782064	0.170847	0.705302	1.05749	1.05527	-0.858478	-0.311235	-0.0354292	0.224256	0.400399	-1.05321	-0.663714	-1.36954	-0.136389	0.298036	0.43026	-1.82671	-1.57258	-1.95803
107852322	0.163401	-0.479105	-0.706013	0.585913	-0.479997	0.726972	0.000510734	-0.942798	-1.13237	-0.153142	-1.9175	0.475693	-0.689855	-0.429249	0.478619	0.162028	0.185164	-1.0775	0.476343	-0.174642	-0.750551	0.940815	2.30568	2.43159
107873356	0.813861	0.360666	0.641531	0.373607	-0.0601914	1.02482	1.36322	0.481817	0.46114	1.41887	-1.23043	0.821406	0.151428	0.236807	0.747545	-0.918049	-0.810631	-1.98103	-0.33442	0.476706	0.630534	-1.44725	-1.52858	-1.69337
107862099	-1.04077	-1.10259	-0.951085	0.920973	0.679955	1.35234	0.00973813	-0.309067	-0.27206	0.0104027	-0.582265	-0.16826	-0.775117	-0.947731	0.277884	0.745382	0.0839095	0.137915	-1.02811	-1.12036	-1.31857	2.12905	1.49788	1.77056
107877502	1.22139	0.636375	0.790646	1.07386	0.204166	0.637029	-0.104986	0.678124	0.840095	1.06137	-1.52037	-0.540481	0.920849	1.09936	0.0460777	-0.843099	-1.30725	-0.155254	-0.316116	0.416323	0.302279	-1.28246	-2.02125	-1.83667
107872354	-0.207703	-0.368042	-0.418392	-0.90388	-0.961825	-0.934568	0.062959	-0.329788	-0.172655	0.317351	-0.972425	0.972986	-0.562071	-0.17439	0.884982	-0.131893	-0.315972	-0.448536	-0.599832	-0.573735	-0.657311	1.95679	1.49413	3.04382
107842951	0.637616	1.49906	0.589709	0.628883	-0.378005	-0.0211306	-0.463935	-0.000830974	0.602615	-0.372212	-0.581682	1.13341	-0.056983	-0.0123634	0.282332	-0.00333125	1.80381	-1.73856	1.12461	-1.10361	0.992471	-1.68795	-1.83304	-1.04088
107843139	-0.196825	-0.113174	-0.328653	-0.516774	-0.468456	-0.546251	-0.143679	-0.0474378	-0.278487	-0.661643	-0.501173	-0.398623	-0.200225	-0.335102	0.0242919	-0.363926	-0.575288	-0.487181	-0.442417	-0.469493	-0.159706	1.21159	2.57973	3.41891
107847600	-0.335618	-0.825034	-0.304018	-0.322392	0.0943575	-0.521224	-0.243504	-0.082499	-0.184157	-0.752271	2.44059	-0.147089	-0.466175	-0.656326	-0.775931	-0.642605	0.636525	0.202444	-0.879306	-0.665124	-1.04882	1.19621	2.31753	1.96444
107867217	0.205603	0.547481	1.94317	-1.71809	-0.769158	-0.474883	0.231777	1.02087	1.0041	-1.33908	0.424295	0.827015	1.38012	0.181766	-0.83796	-0.768557	-0.66722	1.52896	0.247968	0.405598	-0.314916	-0.595519	-0.672886	-1.79045
107864261	-1.54002	-0.836093	-1.68851	1.07415	0.741066	1.28745	-1.43132	0.283075	-0.582689	0.012082	0.107305	-1.45446	-0.717863	-0.00353631	-0.207235	0.763775	-0.277292	-0.486387	1.08947	-0.777178	0.851128	0.969019	1.07656	1.74751
107848521	0.52507	-0.0949325	-0.088983	-0.469493	-0.602698	-0.423202	0.69694	-0.241712	-0.321601	-0.564243	-0.866479	-0.767165	-0.64603	-0.760682	0.755163	0.460066	-0.541808	-0.611111	-0.792663	-0.54039	-0.800288	1.55569	2.55048	2.59007
107862057	-0.782877	-0.596117	-0.790218	-0.528985	-0.365998	-0.504722	-0.647419	-0.415077	-0.705212	-0.731754	2.2469	-0.502357	-0.497074	-0.323444	-0.456529	-0.764522	1.06951	-0.62882	1.81961	0.0988987	-0.594111	1.01793	1.83055	1.75183
107852698	-0.888799	-1.36373	-0.951701	1.09057	0.45264	0.487986	-0.595451	-0.429866	-1.10105	0.769345	-2.69585	0.585215	-0.480428	-0.508885	0.177322	1.04744	0.225722	-0.116157	0.145103	0.157286	0.00995585	1.4236	1.92296	0.636759
107873712	-0.544467	-0.679801	-0.624421	0.37078	0.168492	0.26377	0.0090713	0.589858	0.408944	1.21037	-0.106668	0.764634	1.1773	1.13043	1.46991	-0.0900997	-0.264012	-1.78811	1.40535	0.505245	-0.399306	-2.07967	-1.56565	-1.33195
107867438	-0.429785	-0.89877	-0.914517	-0.446173	-0.212519	0.0383041	-0.437616	-0.74883	-0.984643	0.196346	-0.931406	0.536823	-1.3271	-1.20071	0.669989	0.345165	1.33478	-0.592904	0.107931	0.0633477	-0.0576626	1.69996	1.63756	2.55243
107839242	1.16376	1.33712	1.41658	0.917232	0.392925	0.828673	0.907002	1.13392	1.18207	0.191349	0.558939	-0.355643	0.266215	-0.0874432	-0.487083	-0.991615	-1.01678	-1.03899	-0.658156	-0.531649	-0.232097	-1.53645	-1.66855	-1.69133
107839523	-0.0861026	-0.028855	0.169305	0.619432	1.01004	1.31971	-0.172444	-0.0669394	-0.0906098	0.553794	-1.19829	-0.556004	-0.723952	-0.930972	-0.565831	-0.86699	0.227133	-0.0968515	-1.54098	-1.51598	-0.859615	1.97337	1.81263	1.615
107850251	-0.63394	-1.05965	-1.23112	0.730575	-0.0311674	-0.165666	-1.04813	-1.0297	-1.33284	-0.3092	0.647893	1.63956	-0.835649	-0.974152	-0.441461	0.30571	1.26102	-0.222434	0.915605	-0.708153	-0.0443704	1.25381	1.28253	2.03091
107862024	-0.403017	-0.267923	-0.349432	0.543902	0.29208	0.333856	-0.233036	-0.767375	0.0737	0.554313	-0.581108	0.553737	-1.33762	-1.10183	-0.106966	0.035968	0.040556	-0.820847	-0.639479	-0.872264	-1.2521	1.41745	2.15284	2.7346
novel.5666	1.08391	1.56026	0.553865	0.126209	-0.0626937	0.175132	0.612946	0.445918	1.13954	1.00339	-1.71133	-1.46841	0.436287	0.153743	0.882332	-0.650719	-1.23025	-1.28147	-0.369571	-0.0634739	1.74628	-0.835379	-0.916342	-1.33019
107853343	-0.683214	-0.7192	-0.709989	-0.638407	-0.664038	-0.676874	-0.475664	-0.442328	-0.337281	-0.0651805	-0.139211	-0.204485	-0.366219	-0.475507	-0.170053	-0.0202618	0.557919	0.452228	-0.531359	-0.2877	-0.577995	1.65482	2.87393	2.64607
107871401	-1.15117	-1.2661	-1.31129	-0.118106	-0.466361	0.615263	-1.15431	-0.981421	-1.32589	-0.334601	0.146147	0.756437	-0.376107	-0.376169	-0.891413	1.23835	1.03682	0.663128	0.506475	0.457177	-0.543339	1.3175	1.66188	1.8971
107845456	1.55005	0.888729	1.04506	0.841858	0.971606	0.514213	1.68124	1.24159	0.365247	-0.0738364	-1.60152	-0.790209	-0.0822953	-0.0141409	0.361201	0.513162	-1.36782	-0.623057	-0.766756	-1.04137	0.0480862	-1.66368	-1.04763	-0.949717
107875474	-0.889947	0.603203	1.00003	-0.625371	-0.278622	-0.935663	1.6504	0.768701	0.280607	-1.21529	2.20142	0.744247	1.00367	0.146956	0.240946	-1.07288	-0.141593	-0.405666	1.17922	-1.06068	0.033921	-1.69371	-0.417086	-1.11682
107840483	-0.404516	-0.826173	-0.896445	-0.580395	-0.57602	-0.598313	-0.774449	-0.668623	-0.570966	-0.650879	1.01799	0.143827	-0.510778	-0.639962	0.0823706	-0.328942	1.72828	-0.300066	0.460525	-0.23583	-0.841512	1.96698	1.39071	2.61319
107862345	0.0552225	-0.194155	-0.25877	-0.287146	0.172755	-1.03295	-0.123986	-0.2589	-0.288977	-0.694323	-0.791428	-0.356476	-0.894387	-0.613117	-0.241479	-0.331541	1.13343	0.199857	-0.502193	-0.177227	-1.1384	1.23959	2.81436	2.57024
107867319	-0.872986	-0.871378	-0.87176	-0.291115	-0.473888	-0.466087	-0.892494	-0.756992	-0.811431	-0.200854	2.27591	0.20246	-0.723268	-0.428886	-0.706836	0.154313	1.74342	1.12913	-0.0592846	-0.571796	-0.812784	1.3798	1.1634	1.76341
107866506	-0.141077	0.179123	0.0526685	-0.295239	-0.000493589	-0.493886	-0.559034	-0.14007	-0.379211	-0.557906	-0.1571	-0.415112	-0.752744	-0.736324	-0.736124	-0.176155	0.00954081	-0.00156743	-0.763501	-0.632603	-0.696987	2.12884	2.8415	2.42347
107840793	1.01518	0.0334396	0.726582	0.250389	-0.58418	0.768309	-0.900062	0.909599	0.824718	0.366458	2.07969	-0.160089	0.926022	-0.284079	-1.28835	-1.1577	-0.889043	-0.211744	-0.402975	0.731757	1.3921	-1.89819	-1.35258	-0.895254
107859777	-0.0483139	-0.926467	-0.303092	0.976299	0.456976	1.58982	-0.728236	-1.50166	-0.771793	0.899528	-0.359271	0.603196	-1.53822	-0.96836	-0.497362	0.397404	0.23775	-0.502005	-0.50052	-0.779805	-0.705218	1.71116	1.44839	1.8098
107852305	-0.439459	-0.723388	0.0030904	-0.0716734	0.110671	0.0751199	-0.894558	-1.85336	-0.869559	-0.0813225	1.70205	-0.0595281	-0.312644	-0.773107	-0.833297	-0.525137	1.47954	1.19801	-0.3333	-0.715399	-0.836778	1.23008	1.8781	1.64584
107878760	-0.29941	-0.613891	-0.996346	-0.384806	-0.242115	-0.671103	-0.387237	-0.268684	-0.139817	0.315536	-1.90226	-0.731994	-0.0956118	-0.441819	0.0388526	-0.105693	0.305678	0.103087	-0.354901	0.101962	-0.115172	2.22371	2.5603	2.10174
107842410	0.352354	-0.104576	-0.187579	0.757579	0.737553	0.840149	1.42911	1.35893	0.787903	1.88715	-1.07234	-1.4123	0.669706	0.439693	0.644191	-0.237547	-1.3943	-0.618454	-0.774655	-0.229275	0.18606	-1.02145	-1.46693	-1.57097
107840117	-0.637119	-0.558029	-0.621703	-0.648737	-0.581797	-0.735286	-0.65128	-0.253188	-0.458284	-0.65744	-0.145865	-0.518949	-0.240542	-0.34458	-0.255296	0.00126092	0.0179566	-0.35063	0.433109	0.0761393	-0.268374	2.02559	2.74498	2.62806
107847441	-0.542521	-0.539968	-0.532051	-0.624005	-0.588768	-0.645813	-0.462443	-0.241881	-0.240998	-0.597831	-0.542052	-0.535334	0.0212442	-0.125693	-0.269831	-0.350014	-0.0433775	-0.437986	-0.0834694	0.149435	-0.289207	2.08618	2.89452	2.54187
107873012	-0.439155	-0.655281	-0.754193	0.962888	0.975204	2.23373	-0.238709	-1.0006	-1.01749	0.565818	-1.14403	-0.162385	-0.165016	-0.823108	-0.313758	-0.21889	-0.173923	-0.745823	-0.569829	-0.181365	-1.07841	1.82499	1.42093	1.69842
107851389	0.118592	-0.127053	-0.349193	-0.399432	-0.620457	0.237612	0.2482	-0.768604	-0.192365	2.08861	-1.14751	0.914357	-0.948633	-0.864996	-0.0993484	0.229167	0.310683	-1.02966	-0.978816	-0.73237	-1.16156	1.7926	1.56362	1.91655
107859771	-0.819129	-0.645204	-0.615816	-0.428414	-0.088095	-0.251699	-0.806852	-0.957322	-0.733851	-0.0220295	0.434956	0.348146	-0.828804	-0.816211	-0.318128	-0.0313233	1.39585	-0.288392	0.0181493	0.125098	-1.09563	1.80087	2.64784	1.97598
107848327	-0.662427	-0.670962	-0.684447	-0.682664	-0.664767	-0.680084	-0.53155	-0.521106	-0.521761	-0.60055	-0.55659	-0.402099	-0.0311042	-0.0457296	0.0626436	-0.311438	0.309401	-0.415855	0.196793	0.464174	-0.334857	2.69479	2.09781	2.49238
107867072	1.02535	0.809413	0.387844	-0.00895866	-0.296382	-0.124858	1.22216	1.36152	0.891087	1.39756	-1.79523	-1.08992	0.366114	0.0539063	0.826977	-1.49722	-0.977841	0.111914	0.0721338	0.492067	0.780535	-1.65944	-0.915156	-1.43357
107862699	-0.978793	-0.93844	-0.96059	0.575742	0.917783	1.09873	-0.83562	-0.788525	-0.873351	-0.230438	0.074294	-0.20796	-0.664008	-0.701456	-0.903693	0.8279	0.404201	-0.316461	-0.543438	-0.37929	-0.593633	2.26751	1.79843	1.95111
107853928	-1.26681	-1.5706	-1.19449	0.110143	0.097838	0.872118	0.28883	0.7435	0.229067	0.319888	-0.401174	0.696435	-0.584487	-0.953957	0.466788	-1.07462	0.118213	-0.233773	-0.60871	-0.138473	-0.112959	1.36658	-0.361339	3.19199
107844177	0.883233	0.533495	0.936047	-0.0545064	-0.254971	0.38087	1.2905	1.19008	0.400411	-0.798742	1.67088	0.599695	-0.355172	-0.235299	0.640138	-0.475886	-0.987679	-1.00691	0.477618	-0.612049	1.00073	-1.33268	-2.12092	-1.76888
107863722	-0.702142	-0.665508	-1.0347	-0.155236	0.23141	0.231792	-1.09979	-0.751995	-1.00082	0.754367	-0.701652	-0.118548	-0.625221	-0.615538	-0.319382	0.0272353	0.64062	0.372173	0.278348	-0.903718	-0.32226	1.65046	2.09759	2.73251
107855504	-0.366552	-0.666363	-0.278667	0.306998	0.301251	-0.0705261	-0.200137	0.0346028	-0.163031	0.0318971	-0.937782	-1.19015	-0.0869187	-0.0563989	-0.551618	-0.0606184	-0.614605	0.834063	-0.784672	-0.210958	-0.73509	0.253027	3.93819	1.27405
107877663	-0.873794	-0.899802	-0.825682	-0.701205	-0.766803	-0.76679	-0.537165	-0.455234	-0.283294	-0.60188	-0.00420025	0.455916	-0.777098	-0.699951	0.943634	0.0629514	0.755705	-0.383964	0.591673	-0.140516	-0.652045	1.98383	2.1752	2.40052
107863444	-0.560099	0.3476	-0.734663	0.351175	0.0483083	0.246468	-0.567093	0.0807211	0.604974	-0.221492	-1.81	-0.449147	-0.887474	-0.590055	1.10577	0.545397	-1.04071	-1.35021	1.28224	-1.33954	-0.113294	1.42584	1.82851	1.79677
107840346	0.40912	0.398749	0.305272	-0.196806	-0.515694	-0.611011	0.866326	0.500088	0.70837	-0.576898	1.23414	-0.370022	1.45429	1.6907	0.355696	-0.938211	0.130791	-0.162722	0.577869	0.691916	-0.0660555	-2.0196	-2.01512	-1.85118
107862512	-0.943349	-0.939886	-0.946073	-0.4359	-0.403353	-0.968188	-0.611071	-0.595042	-0.648012	-0.816658	-0.306787	0.0412855	-0.154302	-0.231793	-0.130373	-0.155488	3.14471	1.76802	0.185656	0.205139	0.631323	0.131955	1.84169	0.336492
107848407	0.613747	0.972337	0.705405	0.796831	0.522331	0.375008	0.0131668	0.890643	1.29691	0.99445	-0.37611	-1.14227	0.530229	-0.331441	1.74802	-0.961205	-1.72012	-1.02	0.326907	-0.432235	0.520275	-1.24717	-1.50771	-1.56798
107862412	-0.769793	-0.766822	-0.768118	-0.258751	-0.257409	-0.0172889	-0.754073	-0.733335	-0.715652	0.438452	-0.134101	1.42312	-0.744006	-0.727048	-0.751717	0.225429	1.57415	0.176862	-0.728213	-0.73819	-0.761545	1.90272	2.2676	1.61773
107839003	-0.40143	-0.588259	-0.439974	-0.425488	-0.147209	-0.519299	-0.691858	-0.537296	-0.353626	-0.884619	0.240275	-0.494799	-0.726501	-0.669309	-0.459109	-0.104651	1.74879	0.545308	-0.585758	-0.607234	-0.392856	1.91873	1.91538	2.66079
107873591	0.845149	0.584067	0.410519	1.3374	1.02121	1.32866	0.315077	0.389056	0.376656	-0.56888	-0.939274	-0.46209	0.0569404	0.331899	1.01836	-0.329793	-0.949129	-1.23579	0.00868519	0.0710628	1.60679	-1.86084	-1.67956	-1.67617
107855835	-0.113451	1.0708	1.34659	-0.891601	-1.47926	0.668747	1.12561	-0.166194	0.0153703	-0.976279	0.897253	0.628977	0.305084	1.38555	0.149461	-1.18123	-0.0511819	0.142754	0.055457	0.855164	0.98288	-1.07525	-1.7743	-1.92094
107876575	-1.13022	-1.16048	-1.28513	0.718135	0.327168	0.501198	-0.879375	-0.885149	-0.97137	1.63336	-1.1534	-0.667637	-0.699677	0.179271	-0.609521	1.78359	0.0848628	0.404388	-0.01049	-0.364327	-0.177718	1.14634	1.53547	1.68071
107877805	1.61846	0.859032	1.07035	0.637051	0.634842	0.354773	0.204273	1.31518	1.2165	1.06711	-1.7903	-1.49468	0.791872	0.0369704	0.228313	-0.825488	-1.10789	-0.899891	-0.860638	-0.0162563	0.196019	-1.09147	-0.892607	-1.25153
107842164	-0.577659	-0.491138	-0.707263	-0.426186	-0.193277	-0.700738	-0.702669	-0.468569	-0.428898	-0.659655	-0.230805	-0.611147	-0.365691	-0.391721	-0.383995	-0.0341415	0.703445	0.171589	0.00932082	-0.362656	-0.490615	2.12977	2.63137	2.58134
107863910	0.379109	-0.208234	0.844573	-1.15741	-1.07542	-0.591687	0.367791	-1.0397	0.576357	0.551412	-1.03207	1.71104	-1.1814	-1.16181	-0.218796	-0.218331	0.0614508	-1.28146	-0.300045	-0.239692	0.281463	1.41647	2.26097	1.25542
107850542	-0.693407	-0.454617	-0.730841	-0.398706	-0.0638564	0.00114319	-0.562607	-0.101248	-0.318472	-0.412473	-1.06553	-1.18043	-0.38727	-0.554802	-0.542835	-0.564099	0.00574555	0.209407	0.00388767	0.256562	0.775641	1.92545	1.64522	3.20813
107860335	-0.626426	-0.720044	-0.712562	-0.257052	-0.342882	-0.0242728	-0.257613	-0.791811	-0.485085	0.136209	-0.481075	0.965318	-0.702359	-0.410829	-0.257643	0.147571	0.28666	-0.253187	-0.718308	-0.605882	-0.78504	1.72278	3.10644	2.06709
107851689	-0.389945	-0.78357	-0.840292	0.564646	1.11425	0.407151	-0.430755	-0.732353	-1.12075	1.50443	-1.92364	0.372141	-0.549978	0.108646	-0.342696	0.963206	0.0394143	0.128801	-1.22532	-0.523963	-1.02252	1.53013	1.25197	1.90098
107862094	1.16879	0.261048	-0.22237	-0.445521	-0.141016	-0.559834	0.362404	0.704633	-0.0466054	-0.365283	-1.26145	-0.239556	-1.19598	-1.29406	1.4416	-0.241935	-0.684917	-1.36464	-0.206076	-0.614735	-0.257979	0.917809	1.6496	2.63608
107850899	-1.31481	-1.01018	-1.04283	1.21143	1.34653	1.36014	-1.06427	-0.934154	-1.2031	0.672797	-0.554262	-0.549451	-0.280707	-0.503038	-1.29283	0.159932	0.69065	0.672348	-0.295555	-0.0415962	-0.379908	1.48511	1.50165	1.36611
107852461	-0.93117	-0.813964	-0.770339	0.508293	0.764931	0.512539	-0.852599	-0.872715	-0.920657	0.420481	-0.120271	0.173779	-0.793753	-0.885663	-0.926351	0.736048	0.988915	0.725372	-0.825429	-0.769019	-0.899829	1.55016	1.55099	2.45025
107863273	-0.342238	-0.481667	-0.385242	-0.375021	-0.0146537	-0.481525	-0.38581	-0.550031	-0.433946	-0.492729	-0.364372	-0.602777	-0.582163	-0.580723	-0.442569	0.12442	-0.0611584	-0.00818587	-0.431765	-0.389877	-0.247267	3.08294	2.03515	2.41121
107856207	-1.01721	-1.01954	-0.954955	-0.561496	-0.734708	-0.151793	-0.890092	-1.15892	-0.996218	-0.331669	2.30595	2.10705	0.0507905	-0.507729	-0.299751	0.212465	0.570572	0.0742377	0.624093	0.211405	-0.806288	0.866244	0.61997	1.78759
107862488	1.09252	0.777226	1.41925	-0.124562	-0.380604	-0.228514	1.09365	0.735486	1.29617	0.670133	-1.48249	-1.08951	1.09057	0.667462	-0.221489	-1.26739	-1.64478	-0.721397	-0.667678	1.15254	0.747868	-1.08542	-0.804303	-1.02473
107856907	0.911379	1.36457	-0.133023	0.851643	-0.622178	-0.0279465	0.403105	2.16924	0.269115	-0.577118	0.589188	0.834982	0.509838	0.183236	-1.4802	-0.263382	-1.78426	0.411113	0.350609	0.700292	-0.356244	-1.54969	-1.47005	-1.28422
107859751	0.643	1.01431	0.854183	1.38886	1.35605	1.08548	1.17975	0.648278	0.968297	1.14755	-1.24131	-0.286747	-0.127698	-0.291735	-0.109136	-0.813634	-0.86526	-1.46997	-0.247458	-0.72263	0.0948432	-1.51414	-1.31293	-1.37796
107863869	-0.12192	0.269484	-0.421298	-0.930636	-0.764787	-1.25644	-0.46557	-0.408269	-0.609333	0.0343613	0.947573	0.719075	-0.793676	-0.437457	-1.16609	-0.0482297	1.26793	1.00401	-0.367226	-0.887416	-1.11011	1.49032	1.76768	2.28802
107838826	-1.03489	-1.09961	-1.06185	0.372009	0.323122	0.0303555	-1.0059	-0.811673	-0.887023	-0.662583	1.66744	-0.0637387	-0.350351	-0.273871	-0.978905	0.264836	3.04521	0.845485	0.479751	-0.315367	-0.432132	0.0559754	0.681387	1.21231
107859073	-0.491683	-0.471495	-0.570856	-0.298104	-0.243664	-0.421076	-0.417135	-0.343042	-0.388583	-0.226122	-0.44311	-0.284607	-0.536711	-0.538183	-0.333101	-0.252083	-0.154326	0.0114708	-0.338583	-0.25146	-0.521787	1.66547	2.99239	2.85638
107840037	-0.250296	-0.500893	-0.587671	-0.838159	-0.707879	-0.986527	-0.312074	-0.191532	-0.253035	-0.670488	-0.649543	-0.513669	-0.11928	-0.316795	-0.0162255	-0.32271	2.36926	-0.237303	-0.49707	0.0785354	-0.457266	1.46868	1.98766	2.52429
107858591	-0.339597	-0.951873	-0.534009	0.0557416	-0.11779	0.0997533	0.108999	-0.131447	-1.01796	-0.868078	0.404493	-0.616738	-0.183712	-0.312307	-1.41761	0.499164	0.806584	0.988341	-0.66209	-0.225787	-1.58891	1.70586	1.90287	2.39609
107870274	-0.96428	0.655357	-0.244612	0.220964	-0.570274	-0.518405	-1.01335	0.669683	-0.680995	-0.227933	-0.247352	-1.55951	-0.288663	-0.28717	-1.24769	-0.766391	0.476684	1.62813	-0.507806	-0.56159	0.65851	1.3074	2.40212	1.66718
107858576	-0.42472	-0.516835	-0.297892	0.503953	0.529101	0.473538	-0.723327	-0.522985	-0.713389	2.12966	-0.911712	-0.432282	-0.643148	-0.652578	-0.773332	0.534225	-0.342743	0.103127	-0.890852	-0.865717	-0.582695	2.15962	2.5159	0.345091
107843652	-0.513467	-0.613173	-0.0758984	0.609864	1.40941	1.27686	0.456535	-0.874319	-0.966779	0.466555	-0.144294	-0.501593	-0.677572	-0.868667	-0.970749	-0.396004	-0.299222	0.510673	-1.50542	-0.359175	-1.21599	1.7978	2.06777	1.38686
107870111	1.8322	0.785701	1.35975	-0.9573	-1.03806	-1.03921	0.345117	0.137465	0.533534	-1.02352	2.56768	-0.370419	-0.223726	0.0813712	0.0443771	-0.454851	0.384183	-0.684587	-0.226914	0.0825408	1.14913	-0.953101	-1.25453	-1.07684
107847872	0.162333	0.10039	0.400309	0.52763	0.715326	1.03771	0.0180747	-0.270341	-0.226465	0.640721	-0.853908	-0.0562729	-0.712531	-1.07801	-0.313506	-0.260259	-1.46794	-0.57253	-1.25642	-1.39984	-0.868095	1.98732	1.65881	2.08748
107870618	-0.477191	-0.770128	-0.344633	0.643249	0.34289	1.45321	-0.230238	-0.797566	-0.691771	1.20156	-0.946347	0.834865	-0.70059	-0.78984	-0.742793	0.314055	-0.00305145	-0.809574	-1.0733	-0.710856	-1.01894	1.66418	1.25357	2.39924
107872597	-0.901744	-0.845402	-1.00621	-0.957552	-0.618559	-0.81135	-1.03318	-0.65333	-0.666584	-0.886327	2.59748	-0.675769	-0.36519	-0.276034	0.0295947	-0.0346555	1.38145	0.659323	0.851116	0.64483	-0.07311	1.35967	0.68119	1.60035
107873030	-0.850458	-0.696199	-0.954674	-0.388099	-0.391103	-0.602714	-1.09925	-0.591908	-0.439975	-0.335859	0.635077	-0.91989	-0.264074	-0.620482	-0.0404944	-0.0739787	0.27206	0.196553	0.310612	0.0352895	-0.0913621	1.73155	2.65039	2.52899
107866314	-0.363433	-0.940997	-0.264848	0.108279	-0.415038	0.0448418	0.0271032	-0.620157	-0.46137	0.449628	-0.0412728	0.299086	-0.56008	-0.754171	-0.889603	-0.488845	-0.239425	-0.537827	-0.229302	-0.633133	-0.747016	2.37742	2.48373	2.39642
107850665	0.482812	-0.0415424	-0.393402	-0.583683	-0.745214	-0.745578	0.362559	0.0191622	-0.204474	-0.910347	-0.313574	0.0726066	-0.469572	-0.380907	2.27416	-0.713346	-0.462219	-0.65466	-0.688959	-0.553938	-0.791866	1.6037	0.914796	2.92349
107844449	-0.789954	-0.627068	-0.369205	0.11986	0.77427	0.385864	-0.908984	-0.443548	-0.825942	-0.0976457	-0.818655	-1.16542	-0.4765	-0.510395	-0.91501	-0.375887	-0.14284	1.40991	-0.861872	0.464172	0.00495717	1.9719	2.42146	1.77653
107861814	-0.654106	-0.737517	-0.730698	-0.412776	-0.273024	-0.478168	-0.742292	-0.5395	-0.676645	-0.0689521	-1.18458	-0.344688	-0.455036	-0.409642	-0.160632	-0.157412	0.962453	-0.549321	0.101842	0.447799	0.198486	1.71068	2.78095	2.37279
107877911	0.346929	0.741073	-0.0131487	1.4676	1.13487	1.26224	0.62439	0.987163	0.818931	-0.105502	-0.849656	0.0543383	0.777267	0.0862343	-1.28655	-1.2947	-2.16806	0.356083	0.979395	0.120062	-0.297348	-1.23574	-1.36504	-1.14083
107839787	-0.750126	-0.758878	-0.840324	-0.510632	-0.392057	-0.420014	-0.420888	-0.586795	-0.536797	-0.360756	-0.278614	-0.347525	-0.584749	-0.57101	-0.449132	-0.0965071	0.620682	0.159153	0.570613	-0.235167	-0.383218	2.08606	2.14329	2.94339
107845146	-0.983914	-1.01099	-1.16535	0.0559441	-0.0973546	-0.401366	-0.967637	-0.51815	-1.07968	-0.946374	0.568811	-1.02038	-0.419343	-0.331043	-0.60391	1.02748	2.06994	1.14918	0.55901	0.17263	-0.492916	1.31516	1.1399	1.98036
107853932	0.323815	-0.700053	-0.368545	0.560422	-0.550347	0.666556	-0.952083	0.105481	-1.05035	1.08635	-1.94415	-1.58935	0.647034	-0.0948562	-0.505625	-0.518952	-0.1767	1.32088	-0.711882	0.20818	-0.634134	1.86301	1.54997	1.46533
107850693	-0.54531	-0.727628	-0.540988	-0.00103889	-0.067517	0.19372	-0.368637	-0.78011	-0.536666	0.603697	-0.582537	0.206384	-0.764907	-0.843532	-0.58754	0.792659	0.832009	-0.471389	-0.900306	-0.693625	-0.808007	2.22695	1.70914	2.65518
107873648	-1.14611	-0.398674	-1.27998	0.00930362	1.21039	-0.150695	-1.47905	-0.187996	-0.763768	-0.478731	0.991246	-1.12958	-0.700843	-0.620376	-0.665432	1.02561	0.580164	-0.44349	0.285156	-0.42775	0.562184	1.16327	1.81252	2.23262
107851441	-0.0081479	0.241741	0.913047	0.764426	0.77259	1.66255	1.1101	0.333414	0.627165	1.40905	-0.682007	0.543694	0.877824	1.14745	-1.30375	-0.0207825	-0.741795	-1.2902	-1.11396	-0.835715	-0.490766	-0.964523	-1.8008	-1.15061
107847389	-1.26246	-0.775784	-1.17024	0.389064	1.00164	0.592485	-1.02974	-0.647761	-0.772745	0.80235	-1.33015	-1.27743	-0.0164456	-0.188686	-0.45474	0.130816	-0.174883	-0.283263	0.361013	0.762211	-0.290993	2.00056	1.94231	1.69288
107845709	-1.39424	-1.18541	-0.939111	-0.730149	-0.724155	-0.328096	-1.17095	-0.892768	-0.801937	-0.590971	1.91085	0.128309	0.20323	0.302011	-1.05467	0.420309	1.68851	1.5107	0.324481	0.0362491	-0.186088	1.31149	1.18482	0.977604
107862775	-0.569692	-0.783112	-0.694372	-0.152581	0.680737	0.178107	-0.527525	-0.560549	-0.685801	-0.607663	0.0457753	0.63892	-0.443321	-0.330245	-0.126301	0.216351	-0.650328	0.0829263	-0.749741	-0.58775	-0.857468	2.04764	1.04615	3.38984
107841853	-0.223772	-0.501463	-0.554519	-0.402338	-0.439236	-0.38874	-0.448363	-0.508108	-0.505141	-0.0313604	-0.50634	0.214465	-0.587436	-0.59636	0.713735	-0.0932542	-0.425415	-0.568356	-0.518805	-0.4805	-0.560752	2.38025	2.56515	2.46665
107843744	0.681888	-0.213996	0.601574	-0.992042	-0.78993	-1.46044	1.6695	-0.0965825	1.27339	-0.685756	0.845515	0.46873	0.430166	1.24464	0.511124	-0.404293	1.27602	-0.990525	0.648838	-0.20034	0.349625	-2.33813	-0.724297	-1.10468
107848288	-0.716997	-0.845502	-0.986224	-0.508955	-0.525373	-0.783772	-1.01521	-0.238674	-0.27665	-0.899923	0.97732	-0.441876	-0.508552	-0.308295	-0.446028	0.0536004	0.465341	0.712605	0.791392	-0.49033	-0.324921	1.59424	1.82353	2.89925
107860556	-0.896603	-0.712638	-0.77507	0.646826	0.915117	0.682862	-0.78347	-0.911527	-0.960724	0.204347	-0.887238	-0.158131	-0.537	-0.328906	-0.765074	0.416693	0.657526	-0.681418	-0.610927	-0.321542	-0.484253	1.80266	2.07457	2.41392
107854567	1.15918	0.672697	1.13049	-0.0245732	0.0120571	0.541586	0.987437	0.714324	0.853678	0.111235	-1.02467	0.194356	0.962605	0.724841	0.525671	-1.16892	-1.53736	-1.01217	0.293778	-0.125443	1.07663	-1.7039	-1.59888	-1.76465
107862930	0.121903	0.705654	0.464744	0.727535	0.199165	0.769641	1.23889	1.22887	0.482699	0.796461	-0.265356	1.75107	-0.493587	0.117743	-0.430671	-0.471687	-0.697431	-1.29079	0.49389	0.230754	-0.0256693	-1.47704	-1.9458	-2.23098
107867851	-1.06143	-0.909056	-1.44828	0.33653	0.90977	0.311697	-0.557235	-0.0569545	-0.564817	0.422884	-0.731768	0.253276	-0.991175	-1.02231	-0.30582	0.553139	1.06879	-0.728008	-0.738818	-0.840627	0.426875	2.28427	1.64322	1.74585
107876002	-0.804478	-0.663442	-0.369987	-0.621768	-0.496524	-0.439642	-0.114362	0.80771	0.170807	-0.309586	0.895472	-0.677609	-0.0240275	-0.17123	0.628171	-0.387282	-1.49241	-0.869882	0.052445	0.0273702	-0.809965	0.948242	1.21379	3.50819
107863539	-0.605386	-0.733173	-0.986019	0.555882	0.759729	0.427299	-1.01931	-0.763279	-0.982878	0.213541	-0.778876	0.217786	-0.80488	-0.709978	-0.671727	0.330668	0.631091	0.680074	-1.13495	-0.689718	-0.0391945	1.97805	2.12375	2.00151
107862028	-0.424909	-0.364332	-0.875765	0.0777563	1.43646	0.3788	-1.31201	-0.34153	-0.012848	1.23839	-0.976041	-0.189082	-0.312463	-1.22955	-1.23411	0.260805	-0.414856	1.6113	-1.04883	-0.789818	0.0169889	1.62312	2.09875	0.783776
107873022	-0.587638	-1.08874	-0.592036	1.02822	0.466977	1.09971	-0.547056	-1.28527	-0.67121	1.56635	-0.931888	0.764183	0.050235	0.207775	-1.08128	-0.376327	-0.0511661	-1.26595	0.381316	-0.39259	-1.08937	2.42501	0.818025	1.15272
107878773	-0.520526	-0.49731	-0.538808	-0.567134	-0.560887	-0.569001	-0.434572	-0.394401	-0.415695	-0.469477	-0.484813	-0.202336	-0.537867	-0.541621	-0.0889176	0.181166	0.831692	-0.28873	-0.38158	-0.329534	-0.492511	2.66015	1.8372	2.80551
107858948	-0.546391	-0.186291	-0.45591	-0.439509	-0.482668	0.500925	-0.811711	-0.402165	-0.52059	-0.23886	0.452489	-0.689353	-0.607623	-0.915167	-0.206796	1.64504	1.23131	-0.0448223	-0.874929	-0.743119	-0.640334	-0.0713816	2.46841	2.57944
107858403	-0.411465	-0.351886	-0.28252	-0.607351	-0.55366	-0.600701	-0.508713	-0.373479	-0.361417	-0.417006	-0.619838	-0.592276	-0.427917	-0.517724	-0.358493	0.239379	-0.466925	-0.202539	-0.0900436	-0.0776164	0.102098	3.04874	1.97155	2.4598
107846380	-0.815827	-0.772768	-0.807295	0.393456	0.273573	0.647552	-0.789063	-1.02437	-0.948681	0.695202	0.00445153	0.674183	-0.920839	-0.871047	-0.693299	0.181144	1.7262	-0.630704	-0.353482	-0.50174	-0.850648	1.3609	1.57336	2.44975
novel.5770	-0.358658	-0.243506	-0.296259	-0.530111	-0.432811	-0.532543	-0.57191	-0.407291	-0.413077	0.00758821	-0.254173	0.0398564	-0.489516	-0.62822	-0.50853	-0.299551	1.41144	-0.0250051	-0.866661	-0.848018	-0.666728	1.79239	2.67431	2.44699
107864678	1.13063	0.957354	0.364781	-0.829259	-1.2148	-1.02216	1.23399	-0.832763	-0.269887	-0.997868	-0.756262	0.896058	-1.1552	-1.18339	0.908393	0.299567	0.673936	-1.44693	0.0841161	0.077216	0.0465721	1.11054	-0.361058	2.28642
107867007	-1.21736	-1.26473	-1.28272	-0.396375	-0.588835	0.0136775	-0.620114	-0.643627	-0.473388	2.66839	-0.580805	-0.063834	-0.116028	-0.373254	-0.466741	0.875053	0.261518	-0.0605477	-0.131179	0.055402	-0.37945	1.20696	1.95349	1.6245
107859536	-0.836212	-0.836359	-0.815837	-0.29452	-0.310984	-0.363256	-0.843308	-0.669401	-0.753063	0.00384136	-0.382462	0.180474	-0.625534	-0.494766	-0.688706	0.206661	1.13308	-0.0330407	0.130494	-0.19852	-0.339572	2.08309	1.87663	2.87127
107842667	0.892995	0.771881	1.47983	-0.407776	-0.307779	0.376521	1.57428	0.525834	1.08252	0.633838	-1.31673	0.306952	0.932073	0.229886	0.435251	-0.766743	-1.14112	-1.47053	-0.231509	0.303316	0.648171	-1.24749	-1.41204	-1.89162
107863157	-0.298348	-0.810174	-0.723425	0.0720878	-0.175811	-0.376873	-0.608712	-0.57579	-0.665732	0.194034	1.11936	-0.183104	0.21925	-0.290701	-1.43713	-0.705567	1.15825	0.11261	-0.373187	-0.589787	-1.23531	2.25876	2.31389	1.60141
107877548	-0.0842563	-0.131912	0.28592	1.04859	-0.0667408	0.563125	0.291151	1.08761	0.998366	-0.292668	-0.0607422	-0.581192	0.731379	0.8014	0.166609	-1.25856	-1.74311	0.125025	1.45106	0.28227	1.44789	-1.87858	-1.76861	-1.41403
107873849	-0.853911	-0.92755	-0.926853	0.350318	0.396182	0.0893747	-1.11813	-0.89121	-0.991032	-0.364141	1.15442	-0.604631	-0.581158	-0.631747	-1.02723	0.146806	2.23531	0.426537	0.283542	-0.086373	-0.706458	1.09339	2.20612	1.32843
107858099	-0.549193	-0.554888	-0.568856	-0.440311	-0.421298	-0.412937	-0.553185	-0.552292	-0.557691	-0.0981258	-0.280264	0.0973933	-0.572827	-0.570287	-0.528858	0.470558	1.03054	-0.327368	-0.565233	-0.562492	-0.570748	2.91183	1.98947	2.18706
107860289	-0.0829004	-0.36092	0.328896	0.997784	0.530416	-0.252561	-0.4346	0.476374	1.6665	-1.06645	-0.0925646	-1.13141	-1.46427	-0.660141	1.59115	-0.0174102	-1.48536	-0.350773	-0.96564	-1.16689	-0.0161742	0.570537	1.69686	1.68953
107844747	0.436348	-0.212877	0.232884	-0.764047	-0.416378	0.837564	0.531039	0.246328	0.917397	-1.11325	1.83286	0.167001	1.377	0.0459837	1.10542	-1.32953	-0.785373	1.26917	-0.389918	0.264665	0.369631	-0.979355	-1.38939	-2.25317
107871484	0.497574	-0.218143	0.196831	-0.294091	0.112547	-0.296514	-0.452793	-0.340017	-0.695546	-1.13749	1.82947	-0.138898	-1.42642	-0.996875	-0.739029	-0.0592762	0.388056	-1.49573	1.78613	-0.0282017	-0.864468	1.11566	1.0991	2.15812
107870247	1.96768	0.438228	1.21453	-0.769064	-1.15437	-1.28843	0.500182	-1.21094	-0.0539415	-0.301388	2.12503	0.485989	0.210866	-0.432489	1.29404	0.599437	0.295504	-0.644737	0.255593	0.0299659	-0.0457633	-1.52388	-1.2891	-0.702942
107873635	-0.592054	-0.79441	-0.661208	-0.120246	-0.16978	-0.18002	-0.515136	-0.828209	-0.657155	0.0634157	1.21096	0.407566	-0.938946	-1.00072	-0.705789	0.736346	1.9561	0.116904	-0.635616	-0.912177	-1.0055	1.31553	1.73145	2.1787
107839657	0.530263	-0.480748	-0.00876019	-0.0258165	0.955152	1.36638	0.262091	0.626625	-0.38147	-1.37401	0.779643	1.08835	1.86741	1.00724	-0.424696	-0.467246	-1.75326	0.98896	0.0861532	0.00217457	-0.886552	-1.28755	-0.54032	-1.93002
107860354	-0.606784	-0.724507	-1.1506	0.966817	1.67304	0.87462	-0.995135	-0.12218	-0.6537	0.371294	-1.34682	-0.780738	-0.181375	-0.562988	-0.437757	0.49898	0.116723	-0.575885	-1.12639	-0.51354	0.054783	1.90658	1.16398	2.15157
107862395	-0.964915	-0.971954	-0.855946	-0.146568	0.0787122	-0.550485	-0.797592	-1.02269	-0.731934	-0.942235	2.09912	1.36614	-0.759618	-0.241598	-0.252501	-0.475386	1.91684	0.927885	1.29118	-0.692591	-0.565157	-0.0261855	0.97164	1.34584
107841037	0.332281	0.141896	-0.0853746	-0.611048	-0.772573	-0.620351	-0.820382	-1.02182	-0.935613	-0.587905	1.6026	-0.515749	-1.0497	-1.04	-0.356676	0.744819	0.287148	1.24513	-0.555004	-0.557798	-0.355021	1.45941	2.2253	1.84644
107870104	0.0230781	-0.668702	0.00665213	0.287759	0.408659	0.424181	0.413613	0.693613	1.87652	0.19277	0.501093	0.118789	1.52085	0.672828	-0.80993	0.260117	0.116914	0.655874	0.541365	-0.446106	-0.716175	-1.50696	-2.21353	-2.35327
107848434	-0.632047	-0.905036	-0.514226	-0.614448	-0.506407	-0.398453	-0.757805	-0.659854	-0.672092	0.0883304	2.20678	0.707107	-0.2434	-0.515139	-0.178393	-0.851732	0.158886	0.68605	-0.352908	-0.407036	-1.04068	0.917565	2.37457	2.11037
107842838	0.70834	0.89822	0.913767	-0.381954	0.0388975	-0.884155	0.874555	1.30181	1.21275	0.147614	-0.110452	0.505523	0.949464	0.797001	0.701538	-0.144672	-1.88866	0.129438	-0.106757	-0.28293	0.0261796	-2.15688	-1.46173	-1.78691
107854929	-0.222271	-0.595276	-0.42741	0.0795376	0.138177	0.431647	-0.471502	-0.650815	-0.413062	0.328417	-1.08003	-0.885953	-0.338922	-0.435071	-0.161846	-0.542739	-0.495815	-0.347982	-0.48578	-0.0117165	-0.567352	2.10947	1.97823	3.06806
107867265	-0.45194	-0.480968	-0.394615	0.451132	-0.4373	0.801233	0.440146	-0.129618	-0.95816	-0.3593	0.76217	-1.07444	0.851197	0.955216	-0.519414	1.75837	-0.551426	1.31414	2.19358	0.508106	-0.449387	-1.13454	-1.58695	-1.50724
107851087	-0.626881	-0.622751	-0.611965	-0.0264888	0.369572	-0.10089	-0.613729	-0.255592	-0.446816	-0.545663	0.113165	-0.556466	-0.629648	-0.62238	-0.636686	0.979167	-0.0571412	0.262993	-0.543918	-0.629739	-0.619406	3.64354	1.33556	1.44216
107859062	-0.601078	-0.99454	-1.17658	-0.737846	-1.01999	-1.03909	-0.259849	-0.850364	-0.386193	-0.550734	0.0478873	0.895671	-0.990861	-0.759386	0.328081	1.98285	1.52495	-0.472942	1.094	-0.0422885	-0.243407	1.33816	1.21879	1.69476
107851162	-0.331804	-0.846254	-0.693735	-0.593092	-0.770008	-0.46842	-0.119228	-0.944641	-0.912681	0.126226	-0.310499	1.42783	-0.70337	-0.867581	-0.437834	0.573602	2.93786	-0.45859	-0.0880747	0.327941	-0.714355	1.60501	0.764079	1.49762
107842858	-0.461684	-0.190363	-0.497417	-0.541237	-0.601053	-0.488154	-0.556071	-0.565807	-0.325307	-0.188129	-0.129407	1.80709	-0.760135	-0.709611	1.37446	-0.0524669	-0.357174	-0.75255	-0.689096	-0.676492	-0.726192	1.80396	2.19234	2.0905
novel.2464	0.994192	1.15645	0.965614	0.206755	0.795856	0.649185	-1.02912	-0.0499107	-0.0833421	-1.49227	-0.846328	-0.901737	-0.836909	-0.906457	-0.539825	0.313397	-0.27021	0.380219	-1.22286	-1.25538	-0.86704	1.45479	1.79661	1.58833
107861489	1.77962	0.874243	1.69636	0.7522	-0.0099806	0.867791	0.0396342	-0.16421	0.718873	0.451943	-0.965137	0.167546	0.176218	0.285346	0.772561	-1.22302	-1.2658	-1.23156	0.425097	-0.49605	0.810462	-1.50907	-1.71904	-1.23403
107847659	-0.217635	0.00944515	0.0725591	0.381163	1.45091	1.91535	1.01218	1.56978	0.651941	0.219828	-0.513122	-1.36273	1.11606	0.259443	-0.846295	-1.01408	-1.43144	0.85486	0.226653	-0.160726	-0.404974	-1.05959	-1.46323	-1.26636
107878516	-0.739049	-1.19311	-1.42507	-0.00718173	0.576746	0.25366	-1.2255	-0.100409	-0.155028	0.131047	-0.103066	-1.11885	0.31858	-0.0923409	-1.10922	-0.81077	0.108223	1.98071	-0.504434	0.0565271	-0.0920649	1.23508	2.02169	1.99385
107858958	0.996548	0.200052	0.0775245	-0.918421	-0.71504	0.187601	0.690279	0.594803	0.108336	-1.05062	2.36034	0.15928	0.293153	0.968988	0.879486	-1.22257	0.0634819	-1.65779	0.147242	1.60144	-0.450172	-0.807786	-0.805165	-1.701
107863313	-1.33267	-0.768877	-0.729509	-0.433311	-0.927743	-0.767044	-0.919778	0.44703	-0.561774	-0.0651	0.315012	0.213911	0.148605	-0.605481	-0.417274	0.146035	0.659471	0.799071	-0.153074	-0.966381	-0.55675	2.2065	1.98135	2.28778
107859198	0.661712	0.373837	0.793306	-1.16132	0.10479	0.375564	0.115241	-1.05764	-0.38746	-0.0841994	-0.847972	-0.582192	-1.15415	-0.684832	-0.508587	-0.757866	-0.50024	-0.148557	0.728304	-0.447999	-0.952366	1.6666	2.81755	1.63847
107853815	1.47171	0.909108	1.2707	0.00572454	-0.221465	1.43107	0.47192	1.88294	0.0643629	-1.05707	-1.13934	-0.497291	1.0983	0.773207	0.19803	-0.714014	-1.47752	-0.451981	-1.12172	-0.142118	0.49621	-1.13717	-0.871322	-1.24227
107847763	-0.948216	-1.46941	-1.54319	0.699664	0.953954	0.46117	-0.425979	-0.824968	-0.851507	1.01695	-0.569159	0.896921	-0.644698	-0.29711	-0.691355	0.245752	-0.102917	-0.722937	0.740664	0.0266504	-0.921587	1.3894	1.12808	2.45382
107874246	-0.33945	-0.387934	-0.287625	1.2206	0.684631	0.961652	0.491466	0.93252	1.05763	1.2416	0.0370843	-0.841705	1.5173	0.860273	-0.684373	-0.182344	-1.26559	-0.617103	-0.506638	0.510077	0.590464	-1.08777	-1.74225	-2.16251
107859804	-0.772652	-0.794263	-0.753022	-0.300103	-0.357807	-0.294874	-0.587957	-0.489782	-0.456932	-0.762325	-0.50552	-0.242732	-0.511296	-0.421428	-0.074132	0.120779	0.303079	-0.226764	0.333731	-0.210879	-0.321403	2.53026	1.92608	2.86994
107856534	-1.25004	-1.08712	-1.26208	0.292973	0.306255	-0.732868	-0.455104	-0.711872	-0.924672	-0.213987	2.0264	0.225229	-0.633421	-0.211053	-0.873678	1.15706	1.22737	0.66794	-0.0925783	-0.572517	-0.467223	0.375308	0.648988	2.5607
107851394	0.503471	-0.153664	0.304156	-0.454412	0.261154	-0.904896	0.169734	-0.523629	0.00401658	0.214013	1.4576	0.0878532	-0.934906	-1.16685	-0.321102	-0.921804	1.14176	-0.702295	-0.877389	-0.901225	-1.32687	0.83081	1.34673	2.86774
107840276	-0.634912	-0.590584	-0.611121	-0.427252	-0.395433	-0.363617	-0.630405	-0.635064	-0.629367	-0.454023	-0.0687461	-0.503493	-0.599563	-0.566521	-0.588604	-0.102723	0.755868	-0.479538	0.243096	0.448429	-0.361726	2.33359	2.78356	2.07814
107859112	-0.0316344	-0.768662	0.595411	0.732568	0.786989	1.5512	-0.640251	-0.68424	-0.327168	0.230907	-0.45519	0.863391	-0.674188	-1.00477	-1.05615	0.212834	-0.225941	-1.306	-0.604915	-0.851044	-0.601474	1.21695	0.0105775	3.0308
107859385	-0.575535	-0.602728	-0.594967	-0.542521	-0.561928	-0.562425	-0.639523	-0.527552	-0.515855	-0.502549	-0.131363	-0.532696	-0.263439	-0.301628	-0.115657	-0.430217	1.15167	-0.201268	-0.113871	-0.0835562	-0.490322	1.77939	2.74577	2.61276
107859030	-1.04671	-1.43813	-1.41179	-0.597284	-1.01385	-0.508397	-0.555133	-1.0674	-0.965994	-0.354342	-0.235768	0.870625	-0.310006	0.0449333	-0.304115	0.716986	1.65348	0.783009	1.12789	0.569031	-0.450495	1.09364	1.53548	1.86433
107875564	-0.740064	-1.2333	-1.09077	0.749489	-0.115374	0.593995	-0.468698	-1.25617	-0.576485	0.69233	-1.06977	1.38674	0.296179	-0.138548	-0.727062	-0.328619	0.888224	-0.517557	-0.828264	0.229473	-0.975857	1.20327	1.80138	2.22547
107853900	0.92738	0.817192	0.392199	0.0196485	0.458982	-0.250842	0.697613	1.21085	1.43325	0.80816	-1.95856	-1.50613	0.605759	-0.0575798	0.871506	-0.905241	-1.32144	-0.976368	0.00203882	0.635363	1.25513	-0.63798	-1.44423	-1.07669
107863932	-0.657219	-0.432315	-0.764504	-0.141379	-0.0976841	-0.589859	-0.851428	0.0113263	-0.59901	-0.638826	0.301605	-0.334377	-0.701916	-0.643378	0.548016	0.240476	-0.448361	-0.0536537	-0.234777	-0.342061	-0.785701	2.31112	2.2273	2.67661
107842521	-1.00253	-1.13337	-1.02177	0.926306	0.707639	0.877759	-1.25637	-1.30166	-0.824513	0.841205	0.331258	-0.203909	-0.368141	-0.377973	-0.859118	0.122873	0.489618	0.1955	-0.769237	-0.281181	-0.607439	1.64787	2.2363	1.63088
107860366	-1.18708	-0.569725	-0.670387	0.9582	1.46263	0.348992	-0.413348	-0.237019	-0.522254	0.79341	-1.80963	-1.32736	0.362632	-0.322923	-0.936077	0.00515909	-0.249791	-0.0162875	-1.01814	0.643517	-0.381898	1.62535	1.54961	1.91242
107854914	-0.619654	-0.72068	-0.697491	-0.729652	-0.708829	-0.787397	-0.576652	-0.537462	-0.547632	-0.664287	0.188445	-0.202545	-0.158546	-0.071342	0.0623654	-0.437104	0.312968	0.313917	0.0812977	-0.102101	-0.498685	1.54382	2.82317	2.73407
107850481	-0.434985	-0.417991	-0.445362	-0.374401	-0.346427	-0.344821	-0.441404	-0.396719	-0.399386	-0.375492	-0.389611	-0.424429	-0.394154	-0.413843	-0.401345	-0.219247	0.0847223	-0.233212	-0.337262	-0.270684	-0.393567	2.48384	1.43546	3.45032
107861796	-0.25963	0.229456	-0.457762	-0.720465	-0.676869	-0.76357	-0.168565	-0.0797572	-0.0422173	-0.812991	-0.9338	-0.328495	-0.572012	-0.531525	0.821981	-0.21142	0.173792	-0.79139	-0.260055	-0.434021	-0.186778	1.62843	2.54077	2.8369
107864442	-0.472372	-0.5468	-0.477306	-0.353961	-0.276662	-0.483731	-0.349297	-0.354311	-0.391928	-0.442712	-0.203435	-0.323012	-0.529925	-0.501635	-0.429369	-0.151699	0.311921	-0.00924147	-0.483763	-0.421781	-0.491487	2.45382	1.62367	3.30502
107877921	-0.675198	-0.99366	-0.653305	-0.0869564	0.454847	0.476572	-0.905485	-0.0910834	-0.776495	-0.128195	-1.07376	-0.654102	0.35424	-0.38168	-0.152204	-0.671415	-0.597629	0.841146	-0.388589	0.0886344	-0.576625	1.56017	2.88304	2.14774
107870502	-0.569174	-0.540104	-0.55014	-0.242032	-0.143452	-0.259692	-0.547332	-0.541738	-0.438172	-0.395361	-0.0374346	-0.0771065	-0.519649	-0.556477	-0.527681	0.220926	0.337034	-0.359435	-0.567249	-0.546737	-0.545802	2.01338	2.29685	3.09659
107877394	-0.47177	-0.759561	-0.693657	-0.0201784	0.0917773	0.621372	-0.488507	-1.07882	-0.930545	-0.822187	-0.267903	0.559788	-0.541075	-0.565176	-0.916823	0.195806	0.324491	0.4769	-0.238066	-0.121592	-0.966872	2.35593	1.60167	2.65499
107864220	-0.329998	-0.432037	-0.472649	-0.882484	-0.848829	-0.861915	-0.254552	-0.330882	-0.251037	-0.708728	-0.495952	-0.451398	-0.598324	-0.292018	-0.021002	-0.203852	0.124985	-0.225523	0.662342	-0.213824	-0.177746	2.85896	1.98	2.42646
107851756	-0.0447709	-0.363239	-0.355542	-0.671962	-0.442877	-0.824005	-0.520618	0.310343	0.240076	-0.795027	-0.688546	-0.330246	0.280546	-0.691244	0.18282	-0.769586	-0.23709	-0.27734	-0.356448	0.00325354	-0.632551	1.76563	3.38278	1.83565
107838903	-0.704704	-0.476546	-0.771701	0.733822	0.631267	0.248191	-1.90264	-0.282926	-1.1443	0.677789	-0.952625	-0.267449	-0.314504	-0.65323	0.705654	1.12543	-0.344405	0.137891	-0.134224	-1.07807	0.621408	2.12443	2.36788	-0.346435
107859518	-0.487657	-0.543902	-0.546127	-0.326495	-0.216309	-0.386712	-0.610469	-0.391315	-0.500511	-0.468875	-0.166593	-0.460476	-0.379752	-0.392851	-0.481025	-0.368397	0.52915	0.0512032	-0.29955	-0.266367	-0.586943	1.80934	2.10167	3.38896
107858220	-0.857357	-0.823957	-0.853378	-0.372888	-0.245302	-0.474416	-0.778433	-0.59071	-0.631383	-0.586017	-0.0273039	-0.299938	-0.537968	-0.515853	-0.286017	0.236746	0.810421	0.117917	0.12428	-0.10611	-0.45107	2.28432	2.46546	2.39895
107838744	-0.579634	-0.581005	-0.646434	-0.358252	-0.149864	-0.440952	-0.700667	-0.529984	-0.785555	-0.389329	-0.570616	-0.650447	-0.585307	-0.566942	-0.382974	-0.0204464	0.569694	-0.196596	0.142542	0.40606	-0.209311	1.85604	2.74672	2.62326
107866842	0.236183	0.364736	-0.00216914	1.91796	0.327208	1.09367	0.374369	1.00653	0.450024	-1.74757	0.120134	-1.2385	0.930228	0.77126	-1.36879	-0.204497	-2.03185	0.403268	0.812218	-0.459931	-0.0975619	-0.055215	-1.81036	0.208666
107847979	-0.284664	-0.783594	-0.868772	-1.4698	-1.31382	-1.43647	-0.152495	-0.28551	-0.57543	-1.02323	1.18041	-0.038958	-0.146203	-0.185942	0.433152	0.396419	2.21278	-0.803812	1.13058	1.40605	-0.497004	1.00743	0.876895	1.22199
novel.274	-0.983519	-1.00817	-1.04054	-0.990804	-0.855084	-0.960913	-0.58239	-0.711711	-0.556396	0.472019	0.237594	-0.186639	0.0267984	0.135575	-0.0396898	-0.455191	1.36841	-0.0506958	-0.0598357	0.336558	-0.399469	1.95962	2.46482	1.87966
107843844	0.390825	0.27603	-0.158878	1.36206	1.39168	0.980308	1.8589	1.54256	0.823157	-0.699242	-0.106424	-0.659371	0.28222	0.819697	-0.215198	-0.532201	-0.937506	-0.617863	-0.217773	-0.926063	-0.0722669	-1.093	-1.70911	-1.78254
107859913	0.596176	1.61922	0.507803	0.994181	0.487181	0.438079	1.11116	1.63451	0.746926	-0.224551	-0.117316	0.067281	0.443731	0.579284	0.145373	-0.840144	-1.35164	-0.755213	-0.550823	-1.24509	0.527996	-1.28428	-2.03491	-1.49495
107863325	-0.928096	-0.994989	-0.877009	-0.600108	-0.813251	-0.500953	-0.654601	-0.906311	-0.772903	0.0253399	0.219783	1.21886	-0.311444	0.192673	-0.403785	-0.0139885	2.74889	0.377141	-0.445105	-0.232193	-0.723639	0.901471	1.88142	1.6128
107873438	-0.662383	-0.917431	-0.741378	0.603157	0.455868	0.907152	-0.597825	-0.388331	-0.690535	1.15358	-1.71491	-0.121586	-0.814774	-0.523519	-0.39054	-0.0348219	0.0698822	-0.781845	0.613786	-0.723126	-0.540975	1.59153	1.97661	2.27241
novel.1517	1.19448	0.921519	0.944564	-1.01407	-1.30151	-1.21655	0.394703	0.319738	0.964186	-0.896786	1.93066	-0.171696	0.506852	0.415488	1.70775	-1.29353	0.0197107	-0.682434	0.664054	0.23066	-0.251167	-1.14125	-1.20914	-1.03623
107875684	-0.758263	-0.823659	-0.612113	-0.784193	-0.943268	-0.769159	-0.4726	-0.74958	-0.780645	-0.322677	-0.94941	0.513317	-0.233507	-0.185465	-0.162744	0.088113	1.02701	0.644953	-0.0448871	0.224006	-0.509321	1.87509	2.4309	2.2981
107857112	-1.01173	-1.15813	0.996504	0.334865	0.411694	0.313893	-0.282787	0.123145	-0.730917	0.33821	0.425456	-0.668422	-0.630217	-1.2627	-0.59561	-0.737802	1.01898	-0.819311	-1.25984	0.737298	0.176706	0.63723	3.25082	0.392676
107877849	-0.663521	-0.221155	-0.39559	0.565763	0.303604	0.388009	-1.36442	-0.470896	-0.967644	1.57181	-1.12954	-1.24039	0.595656	-0.632346	-1.13168	-0.303883	-0.401558	-0.298405	0.383899	0.237353	-0.213046	1.26804	2.67836	1.44157
107872605	-0.605305	-0.595879	-0.609189	-0.222618	-0.00286669	-0.286764	-0.603227	-0.533784	-0.555725	-0.153128	-0.072536	-0.458931	-0.515515	-0.48872	-0.497329	-0.0624246	0.147779	0.2385	-0.456867	-0.489407	-0.574069	1.89163	2.4156	3.09078
107839491	-0.968872	-1.04807	-1.11054	0.314132	0.16163	-0.00412678	-0.98307	-0.825139	-0.659187	-0.57394	2.22473	0.0183544	-0.91655	-0.739732	-0.0408672	0.113548	1.91614	1.41799	-0.358285	-0.679521	-0.676193	0.791346	1.1762	1.45002
107869984	1.10514	1.56794	1.37322	0.650481	0.598476	0.455636	0.787528	0.832729	0.695174	0.30796	-1.00542	-0.514871	0.950696	0.460191	0.260877	-1.1321	-1.29651	-0.862768	-0.569459	-0.0925881	0.268385	-1.32402	-1.90976	-1.60693
107842996	-0.0665967	-0.71996	-1.1954	-0.214683	-1.60205	-0.949285	0.613862	0.164672	-0.0527313	0.338141	-0.0959047	1.72781	-0.52326	-0.286989	1.27764	-0.0101172	0.712977	-1.57391	-0.369211	-1.70379	0.377244	1.43016	1.60038	1.121
107877975	1.10812	0.649584	-0.0279263	-0.684635	-0.616493	-0.809974	-0.0736008	0.137799	0.503519	-0.701052	-1.17756	-0.245498	-1.12477	-1.23727	1.82428	-0.0554225	-0.367645	-0.931372	-1.20737	-0.652134	1.13561	1.32482	1.19165	2.03733
107869776	-0.249033	-0.318127	-0.249265	-0.210312	-0.508589	-0.364415	-0.507294	-0.232755	-0.841539	0.655932	-0.232554	-1.22851	-0.43515	-0.999514	0.611899	-1.18515	0.833337	2.40296	0.0142065	-0.633661	-1.02645	1.02449	1.28505	2.39445
107868079	-0.923815	-0.939953	-0.933967	-0.954573	-0.880406	-0.923375	-0.796312	-0.578285	-0.549468	-0.883644	1.36156	-0.636986	-0.159083	0.0503099	0.00800777	0.0943969	1.1998	0.617149	-0.136666	0.933655	-0.42262	1.99331	2.30159	1.15937
107839926	-0.773057	-0.722724	-0.778312	-0.499625	-0.485533	-0.623749	-0.800611	-0.639328	-0.743766	-0.200804	0.0192463	-0.657804	-0.231693	-0.299301	-0.293123	0.201683	2.22986	0.530708	-0.157911	-0.255921	-0.651289	1.22937	2.59921	2.00447
107851080	1.1971	1.10677	1.55047	0.581959	-0.0416219	0.148013	0.925308	0.923297	0.994773	-0.162479	0.536682	-0.777479	0.0813582	-0.125321	1.33781	-0.887411	-1.5017	-1.59029	0.0352433	-0.417662	0.360814	-1.1379	-1.40836	-1.72938
107839653	-0.453379	-1.02832	-1.03109	0.0398603	0.182189	0.866763	-0.798097	-0.491847	-1.10551	0.104496	0.225995	0.338699	-0.352137	-0.73229	-0.694754	-0.446266	0.341767	-0.237564	-0.76951	0.34595	-0.906569	2.07975	2.33848	2.18339
107847472	0.914912	0.429109	1.33198	0.908004	1.21384	0.414092	0.873438	0.894565	0.655816	0.281567	-1.62669	-1.80855	1.01111	0.363935	0.329978	-1.28151	-1.09579	-1.20211	-0.154016	0.589788	0.294955	-1.22721	-1.03547	-1.07575
107847184	-0.387374	-0.709247	-0.514341	-0.672794	0.0350275	-0.698367	-0.783404	-0.329125	-0.776416	-0.892504	0.669421	-0.595904	-0.627298	-0.453898	-0.296002	0.346734	0.98963	0.163854	0.168578	-0.4136	-0.889124	1.79344	2.03361	2.8391
107860493	-1.02728	-1.11718	-1.07135	-0.0631433	0.180464	-0.264611	-0.723129	-0.690574	-0.999077	0.279326	-0.16993	-0.018451	-0.930156	-0.851105	-0.131679	1.3026	1.35886	-0.501864	0.216426	-0.324749	-0.355104	2.04336	2.06671	1.79164
107846398	-1.0937	-1.12652	-1.16625	0.421666	0.627902	0.751013	-1.03816	-0.76075	-0.817924	0.916159	-0.406484	0.171227	-0.571687	-0.636569	-0.960271	0.721551	0.302144	0.699397	-0.568112	-0.448471	-0.713512	1.7299	2.10214	1.86531
107839277	-0.754043	-0.714404	-0.735146	-0.40049	-0.418582	-0.366229	-0.627141	-0.40059	-0.483057	-0.253613	-0.300733	-0.317924	-0.50078	-0.521839	-0.399191	-0.188443	0.0239789	0.00788035	0.800775	-0.0145192	-0.612224	1.97332	2.00841	3.19458
107863554	-0.563347	-0.824512	-0.718278	0.367874	-0.147839	0.403006	-0.930022	-0.69912	-0.752569	0.156473	-0.465206	1.43938	-0.759482	-0.952096	-0.322716	0.999466	1.09525	0.0843309	-1.20639	-0.70261	-0.87642	2.3348	1.10041	1.93961
107870150	1.35119	1.46673	0.53855	-0.220037	-0.0964501	0.24426	1.42448	0.976183	0.993391	0.0947047	-1.24607	-0.641745	1.08602	0.76967	0.412709	-1.02016	-1.46051	-1.00473	-0.714636	0.287197	0.507944	-0.773995	-0.907226	-2.06746
107867486	-0.646984	-0.548036	-0.786874	-0.420203	-0.750587	-0.710652	-0.724209	-0.340131	-0.325669	-0.511137	0.304465	-0.259847	-0.63283	-0.5205	0.457274	-0.402019	0.406228	0.797469	-0.209329	-0.225698	-0.783128	1.53376	2.25696	3.04167
107876694	-0.697203	-0.81308	-0.608995	0.429546	0.770689	1.22439	-0.788814	-0.730678	-0.719286	0.467398	-0.185895	-0.519438	-0.56073	-0.701209	-0.888795	-0.426672	0.0606667	-0.178723	-0.715474	-0.356036	-0.58674	2.06231	2.22506	2.2377
107875516	-0.582071	-0.582788	-0.565972	-0.451521	-0.47306	-0.485664	-0.606894	-0.528929	-0.544033	-0.193267	-0.0155703	-0.367699	-0.52105	-0.576711	-0.335994	0.177631	0.757422	-0.077178	-0.504831	-0.387403	-0.525277	2.50607	2.46309	2.4217
107840094	-0.457871	-0.456418	-0.478286	-0.369966	-0.350113	-0.230249	-0.487697	-0.37179	-0.378066	-0.344422	-0.453983	-0.342783	-0.437464	-0.406572	-0.308388	-0.0797191	-0.134833	-0.317992	-0.425971	-0.40319	-0.38827	3.00477	2.70326	1.91601
107867173	-0.478655	-0.464796	-0.688835	-0.734294	-0.630041	-0.731035	-0.205656	-0.0733377	0.101632	-0.582725	-0.532663	-0.644505	-0.407287	-0.541516	0.417393	-0.289131	-0.086611	0.125648	-0.119028	-0.262825	-0.561389	2.74397	2.15864	2.48705
107862476	-0.720978	-0.762457	-0.604973	0.512082	0.528236	0.149041	-0.639031	-0.947968	-0.57484	2.29389	-1.25175	0.212964	-1.24881	-1.09445	0.15722	-0.0917811	0.104852	-0.422585	1.26389	-0.615786	-0.657658	1.49192	0.919797	1.99918
107860392	-1.23078	-0.761588	-1.08815	0.925385	0.816829	0.576971	-0.843305	0.0959736	-0.708062	-0.391987	-1.21512	-0.584904	0.264117	-0.100093	-0.958357	-0.258544	-0.84911	0.650216	-0.248873	0.42432	-0.481266	2.27289	1.8737	1.81973
107845258	0.883562	1.35459	-0.864375	-0.0323864	-0.416628	0.540482	-1.07182	0.00774878	0.105728	-0.425571	0.78335	-1.06763	-0.945275	-1.14265	-0.456069	-0.498987	-0.101143	-0.67264	-0.558625	-0.475763	-0.0303841	2.18012	0.139329	2.76503
107862280	-0.680841	-0.652837	-0.689667	-0.676952	-0.601481	-0.696387	-0.630689	-0.390844	-0.402135	-0.699703	-0.478782	-0.662708	-0.303594	-0.348146	0.285764	-0.182243	0.402354	-0.0339294	0.193719	0.177157	-0.188127	1.99944	2.51011	2.75053
107847309	1.472	0.372174	2.0175	-0.459849	-0.828189	-1.01297	1.27877	-0.0245915	0.777339	0.637171	1.77694	-0.656686	0.433247	0.166019	0.125025	-0.910716	0.0849892	-0.0994528	-0.926971	0.496138	-0.702177	-1.17531	-0.98726	-1.85315
107856022	-0.596467	-0.682608	-0.649643	-0.567014	-0.602577	-0.670316	-0.549599	-0.5347	-0.492194	-0.654221	-0.62112	-0.306726	-0.578323	-0.535982	-0.0676586	-0.223359	0.611874	0.196832	0.515955	0.264193	-0.238953	1.54861	3.063	2.371
107873278	-1.15873	-1.05948	-1.18187	1.12909	1.28741	0.67267	-1.11967	-0.83018	-1.0502	0.614243	-0.181104	0.0531576	-0.614142	-0.537284	-0.958316	0.307049	0.426842	0.678986	-0.353637	-0.442881	-0.79526	1.40968	1.5572	2.14642
107842730	0.279113	-0.48215	-0.0337484	0.754504	1.28232	0.941399	-0.296326	-0.31827	-0.257669	-0.221952	-0.104845	0.515402	2.82154	1.74511	-0.444937	-0.0431093	-0.852101	-1.54499	0.316923	0.133786	-1.31544	-1.15236	-0.742358	-0.979847
107875767	0.421868	0.693198	0.0629559	1.19095	1.22408	1.68448	0.0973832	0.405104	0.545461	-0.15318	-0.466799	0.939628	0.196985	0.442384	0.720097	-0.0412063	-1.54095	-1.45643	-0.426415	-0.482396	0.939373	-1.94673	-1.526	-1.52384
107871042	0.332384	0.410173	0.507747	-0.82018	-0.739685	-0.751339	-0.599077	-0.627419	-0.0819856	-0.413287	-0.15661	-0.432467	-0.390557	-0.495823	0.0956483	-0.600916	0.231699	-0.834906	-0.460857	-0.63521	-0.586538	2.38556	2.82807	1.83558
107852725	-0.968413	-0.88811	-1.14745	-0.118916	0.0474085	0.349807	-0.571126	-1.16001	-0.991259	0.451125	-0.366533	1.49231	-0.955705	-0.857741	-0.481403	1.24045	1.23759	0.0581454	-0.265892	-0.711847	-0.525257	1.63607	1.73282	1.76395
107864055	0.622184	1.16904	1.62819	-1.03134	-1.2089	-0.0685124	0.773045	0.347005	0.5523	-0.568958	0.347377	1.5965	0.817792	1.10258	-0.593597	-1.00657	-0.77231	0.250971	0.46906	0.674544	-0.562175	-1.59238	-1.10279	-1.84305
107857596	-0.620215	-0.445958	-0.781702	0.706129	1.68705	0.685045	-1.04545	-0.411587	-0.743945	-0.109131	-1.09385	-0.880204	-0.394501	-0.827386	-0.330089	0.355586	0.947032	-0.709941	-0.759835	-0.305734	-0.444362	1.52486	1.4845	2.51369
107875904	1.36319	0.525155	1.55761	-1.07789	-1.4087	-0.887122	1.86194	0.111335	1.32204	-0.69771	0.600931	0.316044	0.384736	-0.325183	1.02277	-0.73068	0.110006	-0.52884	-0.0690854	0.341734	0.39701	-1.25083	-1.31882	-1.61962
107860123	-0.802763	-1.31278	-1.3401	-0.0348252	0.0276435	-0.205974	-0.55439	-0.262554	-0.613471	0.417738	-1.55732	-0.48966	-0.250514	-0.759952	-0.12259	0.659719	1.65313	1.80326	-0.678855	-0.267751	0.161546	0.88837	1.55238	2.08972
107863194	-0.389098	-0.431168	-0.808775	-0.586152	-0.847558	-0.0368692	-1.00905	0.847574	-0.0166646	-0.111633	1.95774	1.40773	1.5994	1.06554	0.224411	0.3952	-0.123286	-0.018992	0.777713	0.878124	0.110819	-1.77078	-1.34158	-1.77263
107853098	0.715299	0.331884	0.545597	-0.676998	-0.313832	-0.682818	0.709819	0.924791	0.289523	0.612464	0.726462	1.5071	0.338858	0.721442	1.49434	0.528115	-1.30601	0.267434	-0.322463	-0.0125521	-0.894187	-1.31397	-2.32575	-1.86455
107864502	0.400532	0.982756	0.775274	0.534179	0.865259	0.404851	0.725459	0.939358	0.784409	0.44545	-0.814476	-0.704213	1.44276	0.901414	-0.0582207	-0.74361	-1.12638	-0.958775	-0.475254	0.131808	0.979161	-1.73351	-1.78133	-1.9169
107868032	0.51026	-0.29386	0.339426	-0.15885	-0.338929	0.0806725	0.520554	-0.837883	0.361269	1.32863	-1.52377	0.809514	-1.14655	-1.05869	-0.452588	0.432524	0.0577144	-1.45576	-1.18949	-0.755839	-0.484748	1.51004	1.6775	2.06886
107843834	-0.304988	0.465013	-0.848471	-0.0318608	-0.26208	-0.454009	0.115313	0.435765	-0.101901	-0.476905	1.0628	0.543878	1.89891	1.04369	-0.0981779	-0.338581	-0.71606	1.03325	0.0492237	0.5489	1.78142	-1.25161	-1.98849	-2.10502
107875631	0.0978815	-0.201691	-0.407459	-0.175072	-1.33203	-0.816052	-0.932565	-0.733178	-0.525411	1.24312	-0.0229457	0.0582257	-0.537415	-0.317725	2.08183	-0.825065	2.29197	-0.344188	-0.552137	-1.13099	-0.367984	0.576251	1.18462	1.68801
107859180	-0.368962	-0.346728	-0.411116	-0.45707	-0.466327	-0.520815	-0.278871	-0.376952	-0.447886	-0.511466	-0.334823	-0.0531198	-0.516492	-0.501835	1.14894	-0.239083	-0.38362	-0.413113	-0.516117	-0.510479	-0.513628	1.44542	2.3123	3.26184
107850478	-0.456683	-0.97373	-0.877607	0.608006	0.821875	0.308415	-0.463861	-0.530097	-0.485452	0.995675	-0.813921	0.455662	-0.862215	-0.985389	-0.0917491	0.316458	0.0304756	-0.191491	-1.09193	-0.740009	-0.962811	1.29676	2.10656	2.58705
107839650	0.118527	0.52717	0.171631	-0.665197	-0.789996	-0.603107	0.0433001	0.0732013	0.208764	-0.309326	-0.538821	-0.494284	-0.834474	-0.838744	0.570976	-0.879497	-0.0462459	-0.806179	-0.566181	-0.707492	-0.406914	1.7769	1.86883	3.12716
novel.4010	-0.449658	-0.609334	-0.565092	-0.472651	-0.448697	-0.494785	-0.624362	-0.266106	0.118075	-0.477148	-0.488976	-0.552527	-0.149937	-0.455498	-0.262418	-0.202657	-0.292885	0.372667	-0.266921	-0.12674	-0.565601	3.12094	1.43793	2.72237
107863255	0.273653	-0.187134	0.347098	-0.688695	-0.896637	0.0204772	2.12889	0.66458	0.890204	0.320928	-0.494236	1.53106	0.769283	0.88349	-0.550462	0.180487	-1.355	0.0993566	-0.38054	-0.276003	1.36347	-1.49484	-1.89511	-1.25433
107862402	-0.748831	-0.784025	-0.71205	0.157362	0.0887597	0.351528	-0.745874	-0.825969	-0.787976	0.402501	0.0352544	0.00723758	-0.810823	-0.726654	-0.796314	0.635438	1.04012	0.126146	-0.755478	-0.778807	-0.835693	2.11025	2.10476	2.24913
107840204	-0.598766	-0.601619	-0.616919	-0.569923	-0.524424	-0.571767	-0.600413	-0.523425	-0.523761	-0.522517	-0.341876	-0.464455	-0.349925	-0.373471	-0.430348	-0.149993	0.403098	0.172811	0.137966	0.129848	-0.441281	1.96694	2.42553	2.9687
107863262	0.21744	0.398447	1.02455	1.35754	0.839026	0.237238	-0.671783	0.19755	-0.325041	-0.84136	1.20698	0.527792	0.898699	0.658515	-1.09711	-1.41508	-0.827053	1.43533	0.704032	-0.853153	0.880196	-1.48072	-1.55527	-1.51677
107841115	-0.594735	-0.701278	-0.612695	-0.145209	-0.409871	-0.4399	-0.577455	-0.797256	-0.595942	-0.120575	1.23268	1.16447	-0.694225	-0.85623	-0.452182	-0.288726	1.46912	0.769314	-0.889239	-0.846922	-0.919913	1.93952	0.927302	2.43994
107854023	-0.729246	-0.655097	-0.762282	0.101161	0.398842	0.265383	-0.797313	-0.767953	-0.761644	-0.288233	0.558927	-0.719755	-0.788204	-0.735404	-0.730863	-0.191457	0.610293	0.00219802	0.0361831	-0.393979	-0.55678	2.20269	2.44745	2.25508
107872221	-0.29141	-0.422709	-0.103484	-0.727011	-0.796638	-0.578002	-0.217866	-0.392469	-0.39643	-0.718658	0.0674125	-0.274881	-0.606108	-0.25877	-0.125355	-0.351135	0.539209	-0.565736	-0.80797	0.117312	-0.293042	3.18303	1.7635	2.25721
107871137	-0.772529	-0.876427	-0.876085	0.931014	1.00899	1.51927	-1.07842	-1.12387	-1.06954	0.770473	-0.892335	0.869209	-0.797899	-0.904898	0.149774	0.60009	-0.552735	-0.540959	0.440972	-0.39635	-0.761984	1.27077	0.760068	2.3234
107877811	-0.717018	-0.751021	-0.806665	0.423639	0.241139	0.274237	-0.524941	-0.710074	-0.708274	0.700797	-0.384803	-0.101241	-0.836211	-0.839997	-0.452783	0.264183	-0.202564	0.856176	-0.67182	-0.754336	-0.889076	1.91664	2.04873	2.62529
107855040	-0.443263	-0.447289	-0.44828	-0.416236	-0.401043	-0.432303	-0.452996	-0.445621	-0.424005	-0.228152	-0.21945	-0.216933	-0.446742	-0.441928	-0.284335	-0.321594	-0.00463847	-0.14875	-0.434264	-0.409877	-0.444824	1.73535	2.50411	3.27306
107855668	-0.510705	-0.239741	-0.661814	-0.161425	0.0866381	-0.0692676	-0.521543	-0.36341	-0.57687	0.226696	-1.04664	-0.820405	-0.603307	-0.692397	-0.257775	-0.48849	-0.191444	-0.0310814	-0.580545	0.215345	-0.0115305	2.57973	2.73737	1.98262
107860608	-1.17978	-1.08597	-1.16943	0.734435	0.356764	1.09888	-0.352861	-1.09543	-0.651747	0.299851	-1.07762	0.54756	-0.517261	-0.658174	-0.733757	0.799788	0.454437	0.434691	-0.057808	-1.1041	-0.541115	1.77129	1.78228	1.94507
107877620	1.06954	1.63762	0.705839	-0.336835	-0.237039	-0.779174	-0.601332	-0.0650768	-0.0708353	-0.731582	-0.297373	-0.227637	-0.611598	-0.679551	1.80395	-1.45116	1.1794	-1.06881	-0.552551	-1.1695	-1.18016	0.598271	1.51014	1.55546
107874693	-0.745581	-0.73858	-0.743299	-0.643909	-0.567087	-0.745919	-0.665462	-0.695183	-0.613593	0.828125	-0.0796532	0.42791	-0.740686	-0.662545	0.494819	-0.14099	3.24199	-0.228529	-0.194718	-0.301269	-0.546021	1.05024	1.48343	1.5265
107840557	-1.53747	-0.816087	-1.71651	0.124072	0.0417064	0.954088	-0.561893	-0.702472	-0.716347	1.12247	-0.655729	0.0580102	0.136794	-1.10187	-0.241042	0.348581	1.04814	-0.556313	0.298659	-0.484109	-0.270873	1.41392	1.3641	2.45018
107846042	0.488676	-0.657251	0.16465	-0.933035	-0.928505	-1.08628	0.348861	-0.746603	-0.5725	-0.475865	-0.380068	0.550119	-0.985071	-1.00858	-0.158186	0.87051	0.518891	-0.183257	0.362704	-0.10995	-0.958628	1.55433	1.21272	3.11232
107866287	-0.683252	-0.760019	-0.576382	-0.0710104	-0.388426	-0.142208	0.139437	-0.806312	-0.637157	0.392337	-0.44428	0.515162	-0.355908	-0.287695	-0.416377	-0.0593477	-0.345432	-0.213175	-0.380504	-0.389541	-0.818086	2.08089	1.07679	3.5705
107868110	-0.775945	-0.476384	-0.819651	-0.533411	-0.122047	-0.465279	0.0154645	-0.830463	-0.353061	-0.201201	-0.986206	0.456807	-0.4728	0.219567	1.392	-0.386867	0.263987	-0.546202	-0.561237	-0.261942	-0.871036	2.14156	1.14414	3.03022
107874755	0.129749	0.0012011	-0.327917	-0.645534	-0.637343	-0.629195	-0.236339	-0.165195	-0.300701	-0.630544	-0.521625	-0.217699	-0.630109	-0.587118	1.18078	-0.236085	-0.264915	-0.569079	-0.532155	-0.565503	-0.582603	1.87768	1.92989	3.16036
107849642	-0.531751	-0.546592	-0.545975	-0.537049	-0.534034	-0.560187	-0.52664	-0.517384	-0.458828	-0.543694	-0.470848	-0.498035	-0.389683	-0.484911	0.193292	-0.452702	0.44945	-0.0631187	0.07764	-0.0913332	-0.313506	1.74446	2.67227	2.92915
107875452	-0.211871	-0.391023	-0.546156	-1.00725	-0.445859	-0.172591	0.207691	-0.140296	-0.422766	0.324265	-1.36448	1.47609	-0.169271	-0.0869426	0.288831	-0.727299	0.735322	-2.03691	0.201062	-0.883315	0.371018	0.825142	1.32217	2.85444
107879360	-0.551809	-0.551956	-0.556243	-0.377393	-0.360401	-0.516673	-0.588653	-0.618585	-0.587773	-0.0447609	-0.245356	-0.195924	-0.62273	-0.597213	-0.568452	0.455401	0.844887	0.382555	-0.618671	-0.60089	-0.592376	2.1492	2.16705	2.79676
107867804	1.21314	-0.483387	0.646748	0.109369	0.0152372	0.535236	0.41879	-0.799302	-0.539358	1.14805	-0.703538	-0.260113	-0.678456	-0.65691	-0.79198	-0.479319	-1.47264	-1.49598	-0.586556	0.103808	-0.82218	1.96803	1.88203	1.72929
107859516	-0.671632	-0.750447	-0.767976	-0.503779	-0.25442	-0.495643	-0.414592	-0.71885	-0.494457	-0.523662	-0.396585	-0.595347	-0.492369	-0.580728	-0.237137	0.144882	0.570458	0.0182128	0.472307	0.474627	-0.637565	1.87479	1.66515	3.31477
107840056	-0.639883	-0.580866	0.0988389	-0.621845	0.00805068	-0.774696	0.283876	0.619847	1.62762	-0.927583	-0.287006	-0.770848	-0.577367	-0.490575	-0.78431	0.754477	-0.874793	2.23403	-0.865913	-0.89339	-0.872792	1.36457	1.98883	0.981734
107861607	-0.741798	-0.75535	-0.75337	-0.438345	-0.382269	-0.462153	-0.693276	-0.434921	-0.543599	0.451236	0.121935	0.08805	-0.486499	-0.650427	-0.380158	-0.192091	1.62991	0.0921168	-0.733869	-0.703399	-0.532062	1.52276	2.62775	2.34982
107842014	-0.43039	-0.433995	-0.427725	-0.323132	-0.227687	-0.39488	-0.431071	-0.435856	-0.430112	-0.348808	-0.397008	-0.34647	-0.437357	-0.429597	-0.429574	-0.0305726	-0.325998	-0.250708	-0.419632	-0.389046	-0.376544	2.61776	2.79617	2.30223
107859938	1.4933	0.809172	1.18536	-1.43233	-1.27227	-1.45531	1.32902	0.455787	0.153829	-0.434472	1.26712	0.740619	0.925493	0.205796	0.572318	-0.120079	-0.426741	-0.659088	0.247377	0.104802	0.584412	-1.06927	-1.47685	-1.72799
107864301	1.0326	0.871249	0.764362	0.638242	0.0857971	1.04181	1.20259	0.788184	0.108575	0.797413	-1.32545	1.72449	0.0482649	-0.495048	-0.680152	0.470182	-0.505598	-1.36778	-0.244461	-0.553929	0.296176	-0.880804	-2.09965	-1.71707
107844785	1.01556	0.464597	0.834036	-0.346807	-0.733672	1.85475	1.02598	0.584306	0.340104	-0.394639	-0.953276	1.46888	-0.0541051	0.166756	-0.186553	-0.227462	-0.838073	-0.0160478	-0.250997	-0.0604643	1.50096	-1.5378	-1.68819	-1.96786
107863414	-0.546136	-0.520816	-0.423151	-0.172195	-0.103937	-0.0776202	-0.421416	-0.523004	-0.518783	-0.631743	-0.485792	-0.471301	-0.310368	-0.361492	-0.724442	-0.681073	0.223508	-0.331674	-0.104309	0.168222	-0.517471	2.44932	2.46021	2.62547
107857912	2.11811	1.2526	0.981739	0.542896	-0.191362	0.254006	0.837347	0.994342	0.610059	-0.780381	-1.28149	1.36437	-0.0826656	0.103677	0.325929	-0.307683	-1.07941	-1.40417	-0.0566557	-0.471551	0.379281	-1.21127	-1.54851	-1.3492
107848955	-0.984126	0.238845	-0.283201	-0.186428	-0.166472	-0.257174	-0.467698	-0.202731	-0.26762	-0.17796	0.553796	0.0583294	-1.10545	-1.20848	-0.207276	0.150957	0.57745	0.590473	-0.900663	-0.896079	-1.25438	1.38435	2.51805	2.49348
107870662	1.11174	1.81153	0.188635	-0.536875	-1.26063	-1.22571	0.22858	-0.0312062	0.57233	-1.3299	1.57101	0.299627	-0.100466	0.159117	-0.0336875	-0.526265	1.1584	0.234063	0.587914	-0.313723	1.55235	-1.37725	-1.09939	-1.6402
107858871	-0.69075	-0.881269	-0.755592	-0.0598389	-0.355876	-0.197757	-0.544538	-0.904977	-0.768175	-0.33932	2.15938	0.44767	-0.941651	-0.716889	-0.34386	0.419937	1.4593	-0.196397	-0.267241	-0.662058	-0.755188	1.0407	2.58571	1.26869
novel.6138	-0.977768	-1.20253	-1.04981	0.873713	0.636746	0.777588	-1.06137	-0.698369	-0.951692	-0.128431	-0.253052	-0.28824	-0.341799	-0.176789	-1.11376	0.238165	0.18902	-0.309493	0.0391831	0.997853	-1.02065	1.77423	2.22976	1.8175
107873926	-0.922807	-1.27429	-0.925296	0.660789	0.210906	0.984725	-1.07177	-0.20285	-0.27461	0.388432	-0.287657	-1.50699	0.420079	0.0551798	-1.00412	-0.667226	0.466136	-0.200915	0.524672	-0.347408	-0.730819	1.92083	1.27028	2.51472
107860396	-1.12679	-1.11403	-1.01956	-0.420954	-0.682517	-0.699716	-0.809211	-0.682902	-0.627011	0.109611	-0.188298	0.129232	-0.156695	-0.136498	-0.235782	0.230646	1.41444	0.696829	-0.520911	0.0499045	-0.541005	1.93844	1.94327	2.44951
107863068	-0.290363	-0.285737	-0.126239	-0.458926	-0.6351	-0.265851	-0.690533	-0.606973	-0.383879	-0.614524	-0.0218174	-0.516654	-0.519725	-0.554011	1.21144	-0.767934	-0.168169	-0.597509	0.293641	-0.354915	-0.654394	2.06477	2.05107	2.89233
107843373	0.525345	1.17862	-0.759688	-0.224139	-0.53207	-0.247141	-0.560038	0.74018	-0.0727049	-0.582695	2.27073	-1.18625	0.388251	1.2129	-0.360967	0.34726	-0.13402	1.5725	0.0807481	-0.344212	1.16766	-1.39893	-1.4039	-1.67743
107875819	-0.0844302	-0.29033	0.281685	0.923366	1.18523	0.780726	-0.501071	-0.217065	-0.0494343	1.60361	-1.04953	-0.667585	-0.519407	-0.609686	-0.847901	-0.473598	-0.658009	-0.114579	-1.63657	-0.7085	-1.33593	1.2897	1.7059	1.9934
107848285	-0.483049	-0.575792	-0.555781	-0.527807	-0.543787	-0.526425	-0.272741	-0.437367	-0.431101	-0.408604	-0.514143	-0.256058	-0.383918	-0.387636	1.2926	-0.223526	-0.142769	-0.324327	-0.436222	-0.407675	-0.523108	2.35574	1.68806	3.02543
107862089	-0.546118	-0.604341	-0.573397	-0.270273	-0.258552	-0.0555189	-0.557574	-0.630447	-0.62034	0.353044	-0.120867	-0.0591356	-0.646	-0.621284	-0.525888	0.154226	0.0766855	-0.2594	-0.54706	-0.568552	-0.545807	2.44667	2.2202	2.75973
107842647	-0.330563	-0.627867	-1.1435	-0.356817	-1.29445	-0.516791	-1.18671	-0.874323	-0.29829	-0.316424	0.292486	-0.964372	0.61428	0.418823	-0.623494	0.301417	1.42142	1.30435	0.199574	-0.371401	-0.438037	0.81479	0.975514	3.00038
107867672	0.221996	0.813123	0.0728345	0.469454	1.12936	0.768265	0.459931	1.76561	0.418308	0.100167	-1.59609	-0.349763	0.550537	0.854093	0.614175	-1.30145	-1.25439	-0.907306	-0.279576	0.277568	1.45852	-1.69105	-1.23898	-1.35533
107842930	-0.0133917	0.199483	-0.375337	2.19099	0.199813	0.359152	-0.00151252	-0.265115	0.271849	-1.24408	0.335373	1.10656	-0.107956	0.712728	0.0459343	1.05555	0.0191361	-0.912643	1.00651	0.655297	0.296053	-1.62802	-1.43296	-2.47341
107848457	-0.699748	-0.756975	-0.740577	-0.703028	-0.694602	-0.747009	-0.629377	-0.397686	-0.39548	-0.602342	-0.209822	-0.497838	-0.378995	-0.287213	-0.0585516	0.470759	0.284739	0.706529	0.166813	-0.507832	-0.429915	2.35043	2.6475	2.11023
107847519	-0.780005	-1.1803	-1.46342	-0.464698	-0.300546	-0.511827	-0.718631	-0.74171	-1.02954	-0.360742	1.80653	0.106803	-0.496203	0.356567	-0.708183	-0.131128	1.11346	-0.00631277	0.905457	0.0407539	-0.712013	1.71878	1.86965	1.68727
107854247	1.08762	0.725232	0.136047	0.685708	-0.0282209	1.46445	1.05341	1.28003	1.1384	0.836826	-1.51106	-0.423775	-0.485428	-0.22447	0.50532	-0.280174	-1.1561	-1.56374	-0.690175	-0.39171	1.43794	-1.16074	-1.08045	-1.35495
107857080	-0.726039	-0.606941	-1.04025	0.193624	0.192667	-0.587205	-0.197889	-0.439489	0.425039	0.748956	-0.110748	1.28876	-0.979028	-0.678445	-0.801624	0.950632	-0.307927	0.188437	-0.345488	-1.39595	-1.34629	1.77594	2.45133	1.34793
107849654	-0.769918	-0.968504	-0.887527	-1.07487	-1.17007	-1.27624	-0.272128	0.167461	0.728349	-0.470647	0.667026	0.186269	-0.4016	-0.224746	0.513208	-0.769546	3.16475	0.371431	0.575426	0.958357	-0.849673	-0.17473	0.90097	1.07695
107878556	-0.542868	-0.648621	-0.570047	-0.213246	-0.872611	-0.0442462	-0.76772	-1.05746	-0.653054	-0.532817	1.64378	1.79907	-1.12437	-0.945831	0.760681	1.28816	0.157166	-0.566498	2.01067	-0.921833	-0.837253	0.606342	0.905048	1.12755
107874221	-0.330147	-0.445509	-0.476196	-0.421948	-0.375773	-0.491202	-0.503573	-0.359876	-0.551109	-0.0308027	-0.0578005	0.280505	-0.749027	-0.848029	-0.597315	0.105305	1.99929	-0.0530906	-0.81711	-0.729678	-0.875538	1.78755	2.18476	2.35632
107851151	-0.432966	-0.473205	-0.466312	-0.481297	-0.461659	-0.480426	-0.477092	-0.433201	-0.445316	-0.477739	-0.464084	-0.484147	-0.43334	-0.411212	-0.232877	-0.40248	-0.0502057	-0.475389	0.218982	-0.131245	-0.116526	2.89975	2.43861	2.27338
107842465	0.929886	1.03561	0.605781	0.0438335	0.774924	0.192721	1.73404	0.898798	1.23466	-0.250194	-0.594222	-0.632432	-0.0703445	0.185261	0.499003	-1.22481	-0.803374	-1.25912	0.0379633	0.640815	1.02986	-1.51529	-1.82285	-1.67053
107873826	-0.860416	-0.863546	-0.877333	-0.812256	-0.81767	-0.833875	-0.81343	-0.723771	-0.659509	-0.746061	0.0849248	-0.284976	-0.269868	-0.312333	0.0431336	-0.433649	2.24512	1.59174	0.159861	0.783573	-0.386747	1.34709	1.71612	1.72388
107842859	-0.343632	-0.577645	-0.536128	-0.64104	-0.494544	-0.671045	-0.67153	-0.454902	-0.512706	-0.400827	-0.2807	-0.595826	-0.580708	-0.537987	0.000402962	-0.595023	1.29177	-0.172959	0.1528	0.0268888	-0.464783	2.09586	2.53604	2.42823
107879256	-0.428868	-0.448211	-0.733766	0.521457	0.881921	0.589219	-0.689525	-0.297602	-0.41123	1.13423	-1.44761	-1.03059	-0.299832	-0.606508	-0.0835929	-0.624227	-0.596501	-0.285629	-0.984311	-0.2818	-0.119245	1.87153	1.96837	2.40233
107857127	-1.68653	-1.43534	-0.981851	-0.622593	-0.150264	-0.0354721	-0.846663	-0.565482	-1.06577	-0.741437	-0.468113	0.560293	-0.575541	-0.774602	-0.20979	1.10939	1.41742	0.86335	0.443233	0.816509	0.700861	1.22084	0.780155	2.24738
107859538	-0.514445	-0.517104	-0.523721	-0.443906	-0.374966	-0.453507	-0.506769	-0.467663	-0.465528	-0.321652	-0.27024	-0.158674	-0.505104	-0.51617	-0.433383	-0.0462834	0.978464	-0.23352	-0.51866	-0.520523	-0.49781	2.13108	2.21118	2.96891
107875783	1.45212	1.60948	1.3837	-1.08697	-0.977038	-1.04683	0.818536	0.80698	0.840643	-0.96354	1.97179	-0.401046	0.523306	0.0669514	-0.11076	-0.649412	-0.200583	-0.25687	-0.853842	-0.152066	0.713481	-1.19571	-1.22489	-1.06741
107856311	-0.920485	-0.8285	-0.979394	0.0827437	0.168029	0.121964	-0.723152	-0.0975722	-0.599632	-0.803959	0.0663965	0.0814563	-0.729664	-0.709133	-0.63053	0.652868	0.824408	0.767767	-0.577449	-0.760591	-0.897198	2.15296	2.25693	2.08173
107849161	-0.546329	-0.659781	0.0570993	0.942512	-0.264436	0.558682	-0.0163659	-0.378353	-0.707261	-0.724455	-1.78532	0.839967	-0.311961	0.111357	-0.875834	-0.596309	0.471267	-0.520071	-0.860844	-0.202725	-0.158584	3.19165	0.868038	1.56806
novel.6996	-0.270101	-0.256423	-0.402823	-0.220824	-0.27331	-0.427078	-0.628321	-0.420484	-0.494919	-0.557758	-0.263653	-0.424214	-0.667455	-0.633728	-0.272778	0.14009	0.458173	0.265473	-0.600566	-0.579646	-0.551958	2.96022	2.93697	1.18511
107874406	-0.0740403	-0.348634	-0.393045	-0.269335	0.266784	-0.885078	0.0208501	0.882161	0.426736	-0.754248	-0.706695	-1.27582	-0.476593	-0.693595	-0.498009	-0.396074	0.879389	-0.61086	-0.238664	-0.45958	-0.866581	1.65328	1.90005	2.9176
107855969	-1.25998	-0.973871	-1.4307	-0.368157	0.405242	-0.598675	-0.702206	0.481646	-0.229176	-0.109828	-0.493078	-0.246509	-0.905482	-0.683836	2.02273	0.440801	2.80425	-0.250923	0.617392	-0.60485	-0.161064	0.0873304	1.24419	0.91475
107847552	-0.214113	0.21751	-0.127155	-0.491961	-1.05844	-1.19671	0.00408818	0.267621	-0.506749	-1.09662	0.38977	0.18041	-0.604884	-0.434464	1.08905	-1.139	2.65873	0.143022	-0.645153	-0.828701	-0.822098	2.00921	1.06384	1.14278
107848504	-0.816675	-0.807351	-0.805376	-0.73473	-0.755339	-0.782238	-0.673523	-0.729856	-0.649249	-0.260572	-0.242679	-0.366313	-0.299947	-0.0626565	2.02104	-0.407738	1.55131	-0.328018	-0.149457	0.0704555	-0.276143	1.54326	2.45497	1.50682
107868335	-0.662652	-0.902108	-0.433072	0.617505	2.13733	-0.0801236	-0.453719	1.33758	0.171908	-0.896196	-0.513752	-1.46354	0.635705	0.77883	-0.290573	0.0561048	-0.338814	1.70177	0.730218	-0.208474	1.55231	-1.44739	-0.767882	-1.26097
107839574	-0.584229	-0.649516	-0.720595	-0.077058	-0.0349559	0.0174734	-0.821041	-0.785737	-0.758542	0.661752	-0.327541	0.488297	-0.912903	-0.971401	-0.694144	1.29357	2.31021	-0.737126	-0.687089	-0.322691	-0.567906	2.11926	1.52739	1.23451
107876043	0.410023	-0.30143	0.61485	-0.193325	-0.981382	0.432835	0.887559	-0.637557	0.34048	0.969574	-0.63461	0.829997	-1.69482	-1.48614	0.953773	-1.1199	0.10275	-1.35492	-0.658191	-0.529223	-0.681363	1.34024	1.59655	1.79423
107851411	-0.753246	-0.523691	-0.784149	-0.401176	0.0436259	-0.302992	-0.524327	-0.0500468	-0.046309	-1.06308	-0.392414	-0.887268	-0.656114	-0.527173	0.217834	0.0754588	0.41075	1.26719	-0.783282	-0.132678	-0.769772	2.40272	1.51199	2.66815
107877232	-0.413064	-0.510089	-0.557243	-0.963841	-1.00059	-0.9662	0.418042	-0.835499	0.0649443	0.69854	-1.02355	1.19472	-0.96331	-1.00562	1.25749	0.639361	0.874064	-0.959706	-0.342492	-0.676226	0.00148021	1.74634	1.02995	2.2925
novel.1292	-0.674733	-0.703959	-0.72209	-0.520024	-0.546012	-0.579618	-0.58261	-0.644497	-0.505947	-0.330573	1.22279	0.412555	-0.627632	-0.641764	-0.0282733	-0.474092	2.52409	-0.294649	-0.515492	-0.436138	-0.613213	1.52275	1.62238	2.13675
107870980	-0.77931	-1.11464	-1.13516	-0.268751	-0.0695365	-0.263717	-0.519288	-0.314919	-0.639737	-0.332847	-0.545465	-0.654248	-0.309739	-0.230458	-0.449593	0.195036	-0.441966	0.246502	0.828036	0.607608	-0.71088	2.38548	2.24842	2.26918
107848111	1.22665	0.180887	0.782451	-0.119097	0.0457311	-0.345537	1.83076	0.565211	0.1267	1.51859	-0.577642	0.226229	0.787639	0.424083	0.780616	-0.846641	-0.686083	-0.946878	0.36302	-0.728009	0.740992	-1.55821	-1.80521	-1.98625
107860815	-0.46606	-0.634341	-0.573571	-0.636184	-0.568518	-0.498183	-0.106714	-0.0125811	-0.320476	-0.79814	-0.585031	-0.545537	-0.238608	-0.323155	-0.372676	-0.492607	0.388531	-0.662585	0.167769	0.153594	-0.232025	2.10025	2.95812	2.29874
107854552	0.963501	0.569428	1.16218	-0.241255	-0.645296	0.943249	0.945258	-0.284249	0.203837	0.0702408	1.60691	0.228838	-0.756277	-0.599374	1.2222	-0.746595	-1.14957	-0.489735	1.95956	-0.580221	0.0580943	-1.25274	-1.62919	-1.5588
107877419	-0.242298	0.219808	-0.73108	0.695543	0.30511	0.0154321	-0.942687	-1.09435	-0.52781	0.276775	-1.72479	-1.10162	-0.745426	-0.623001	-0.866009	0.773427	1.0069	-0.153334	0.123441	-0.0259842	-0.506241	2.15369	1.93721	1.7773
107845999	-0.26835	-0.155347	-0.349718	-0.732435	-0.725068	-0.781309	0.51353	-0.0531606	-0.305168	-0.756142	-0.461784	-0.271765	-0.351075	-0.312355	2.05162	-0.297823	-0.764057	-0.637038	-0.276522	-0.337426	-0.687691	1.25238	1.62057	3.08612
107847740	-0.590875	-0.651266	-0.708508	0.429659	0.0725592	-0.241566	-1.11767	-0.724827	-1.28353	-0.431743	-1.04429	-0.934126	-0.110993	-0.360799	0.0085927	1.04199	0.180847	0.192693	-0.311213	0.817739	-0.357276	1.5544	1.6316	2.93859
107840468	1.29011	0.546967	1.3496	-0.556995	-0.515749	-0.359563	-0.419467	-0.466504	-0.0070952	-0.791284	-0.819292	-0.853947	-0.604913	-0.788646	-0.196883	-0.774054	-0.381002	-0.719601	-0.304903	-0.137596	-0.71744	2.36421	1.68817	2.17588
107861931	-0.902684	-0.585744	-0.449858	0.379573	0.938845	0.452709	-0.68655	0.385303	-0.671037	-0.0735638	-0.593367	-0.653776	0.0214542	-0.557099	-1.22974	-0.56516	0.153087	-0.500393	-0.712993	-0.369295	-0.509705	1.97129	2.26812	2.49058
107863873	-0.364289	-0.511736	-0.555603	-0.0221377	0.162442	0.305463	-0.631855	-0.321586	-0.628798	0.61515	-0.878594	0.0247239	-0.780548	-0.557324	-0.314483	0.503859	-0.316531	-0.330349	-1.09772	-0.628052	-0.480319	2.00916	3.19421	1.60491
107867904	1.02375	0.541158	1.00373	0.58551	-0.214977	0.964857	0.930081	0.481016	0.610472	1.52781	-0.422173	0.0977754	-0.501	0.0764384	0.663959	0.232749	-0.950914	-0.979287	-0.0227153	-0.603869	0.814545	-2.31738	-1.60458	-1.93697
107860668	0.387412	0.397892	0.429142	-0.765507	-0.689966	-0.207255	-0.0483293	0.15445	0.267522	0.975578	-1.70348	0.657455	-0.596414	-0.61616	-0.411499	-0.55626	-1.32077	-1.29775	-0.826712	-0.352342	0.564525	2.43299	1.09046	2.03501
107851270	0.411703	0.941374	0.570676	-0.461161	-0.924368	0.12928	-0.58822	0.654857	-0.0759683	-0.564279	1.28439	0.26755	1.64957	0.712551	1.07451	-1.04665	1.29664	-0.527219	-0.0734672	-0.275742	0.84175	-1.59303	-1.64482	-2.05992
107862848	-0.474574	-0.486663	-0.497481	-0.516327	-0.521648	-0.531011	-0.488362	-0.495076	-0.490802	-0.472684	-0.366432	-0.494616	-0.291774	-0.316701	0.566163	-0.0282988	-0.402537	-0.231882	0.223392	-0.250064	-0.286163	1.82946	1.23563	3.78844
107843934	-0.698083	-0.682441	-0.670642	0.277514	0.00734202	0.0719982	-0.618748	-0.745701	-0.684559	0.0646293	0.0154185	-0.0310922	-0.723942	-0.698582	-0.625992	-0.181339	0.377882	0.538989	-0.595855	-0.673523	-0.72062	1.70926	2.65802	2.63007
107863455	-1.30333	-1.26581	-0.985159	0.558963	0.750944	0.205748	-0.759755	-0.433755	-0.539934	1.72804	-1.72759	-0.489939	-0.197054	-0.305873	-0.492195	0.424026	-0.137076	0.765926	-0.602588	-0.288606	0.197736	1.44857	2.37691	1.0718
107870187	0.890662	1.93373	1.0693	-0.0155953	0.83225	0.4233	1.25759	0.891961	0.777493	0.0905712	-0.60942	-0.0508033	0.646084	0.260931	-0.570225	-0.537858	-1.5134	-0.944824	-0.694561	0.056139	0.640899	-1.42718	-1.51917	-1.88787
107842774	-0.435306	0.119196	-0.0216675	-0.685793	-0.506507	0.112708	0.701886	0.331753	0.53964	-1.12602	0.930584	0.595528	-0.130019	0.763189	0.284814	0.0635272	-0.346761	2.3018	-0.120941	0.37341	1.64651	-1.80948	-1.70178	-1.88026
107839876	-1.10644	-1.00115	-0.991639	-0.392599	0.0275982	-0.360899	-0.62796	-0.708674	-0.638034	0.714776	-0.0270575	1.18444	-0.704067	-0.653222	-0.0085869	-0.20023	1.35727	0.597025	-0.744222	-0.671526	-0.61191	1.27555	1.47101	2.82054
107841773	-0.0999978	-1.42269	-0.405649	-1.27032	-1.53707	-0.996146	-0.23831	-0.662988	-0.650502	0.782527	-0.341396	1.77686	-0.466889	-0.816286	0.264291	0.220012	1.40152	-0.0555351	0.295571	-0.103894	-0.294431	0.963498	2.18545	1.47236
107848483	-0.382972	-0.468723	-0.0254766	1.13204	0.260525	0.332941	-1.13566	-0.0849661	-0.65521	1.3072	-1.77875	-0.949334	0.0419481	-0.0450152	0.178261	-0.797434	-0.252585	-0.434333	-1.35643	-0.114873	-0.428706	1.84578	1.76438	2.04739
107868516	-1.01457	-1.0203	-1.01647	0.854141	1.13868	1.381	-0.808696	-0.619507	-0.954718	1.01904	-0.86303	-0.755869	-0.191521	-0.37769	-0.835763	0.385065	-0.367328	0.389864	-0.329528	-0.442413	-0.762815	1.47052	1.43012	2.2918
107839444	0.256669	1.24281	0.66684	1.07483	1.66973	-0.0142801	0.4443	1.16471	-0.239385	-0.488551	1.66347	-0.59531	-0.0889199	0.501494	-0.468654	-1.50831	-0.804604	-0.576271	0.323191	-0.472888	0.877265	-1.34924	-1.60261	-1.67629
107871175	0.790509	1.52838	0.7406	0.227877	-0.0414904	-0.361946	0.0548474	1.9667	0.736425	-0.162417	-1.23512	-0.0540284	1.42217	1.26635	0.650443	-0.515726	-1.3078	-0.30962	-1.11989	-0.119726	-0.0292516	-1.48194	-0.967686	-1.67767
107870976	-0.595125	-0.618481	-0.311324	-0.62804	-0.735667	-0.573214	-0.380679	-0.468437	-0.340855	-0.159965	-0.132449	0.811609	-0.402221	-0.395412	-0.274606	-0.35136	0.710359	-0.757439	-0.536116	-0.649171	-0.388857	2.2975	2.63867	2.24128
107848338	-0.364325	-0.201748	-0.240185	-1.29905	-0.889543	-0.402074	1.36013	-0.0985363	1.30887	0.108043	0.84153	0.838252	1.90505	0.322007	-0.649924	0.711478	-0.286628	0.556049	1.40709	0.468356	-0.998256	-1.4056	-1.96227	-1.02871
107843074	0.0585807	-0.297346	-0.307238	-0.551209	-1.13153	-1.0406	0.273707	-0.402721	-0.874602	0.820957	1.20272	-0.227204	-0.0884588	-0.851953	-0.821529	-0.739218	2.72656	0.0245784	-0.6513	-0.440057	-0.755076	1.85099	0.610886	1.61107
107870983	-0.605823	-0.62629	-0.695269	-0.6189	-0.658534	-0.608149	-0.657594	-0.669379	-0.693325	-0.539973	-0.0940171	-0.226856	-0.401554	-0.454882	-0.394856	0.0335187	1.15545	-0.00252757	0.171777	-0.0461378	-0.396795	2.44153	1.89444	2.69414
107840921	-0.547481	-0.583554	-0.590001	-0.555649	-0.549607	-0.57801	-0.50381	-0.478092	-0.338498	-0.459356	-0.4833	-0.398169	-0.351369	-0.421977	-0.0520867	-0.312595	0.462494	-0.0113741	-0.224736	-0.0564985	-0.369169	1.74388	2.89123	2.76773
107878736	0.144352	-0.155754	0.804118	-0.69385	-0.880754	-0.548041	0.941245	-0.344652	0.0227017	0.924022	-1.02721	-0.454482	-0.244904	-0.478333	0.116514	-1.0284	-0.630288	-0.869996	-1.24646	1.18257	-1.02836	1.26759	1.58513	2.64326
107847594	-0.330635	-0.620888	-0.883138	0.17345	0.564957	-0.0282303	-0.394368	-0.413658	-0.158191	-0.843346	-0.451589	0.761094	-0.952433	-0.911883	-0.235753	0.594358	-0.598167	-0.44047	-0.821695	-0.494436	-0.329687	1.81092	2.54099	2.46279
107851350	-0.895169	-0.889964	-0.922896	0.432892	0.592451	0.309808	-0.861978	-0.891519	-0.831115	0.21644	0.427364	0.43121	-0.84059	-0.83808	-0.854238	1.05698	0.688641	0.535161	-0.84367	-0.825234	-0.898686	1.62173	1.81167	2.2688
novel.5555	-0.873791	-0.8928	-0.939986	-0.201196	0.31774	-0.8325	-0.873794	-0.771215	-0.203822	0.917133	-0.218851	0.124892	-0.733767	-0.900145	-0.365719	-0.277659	0.316763	1.41923	0.934066	-0.352972	-1.10786	1.94116	0.963055	2.61205
107877822	0.561025	-0.0954284	-1.04574	-0.398656	0.467944	-0.177148	-0.887801	-0.357564	-1.10317	1.04797	-0.938902	0.927317	-1.55881	-0.566137	0.329132	1.11658	-0.191176	-0.302715	0.308569	-2.05432	0.550573	0.714944	2.11233	1.54119
107858807	1.54893	0.637408	0.614366	0.0868021	0.118307	-0.467361	0.0415941	-0.543372	0.519939	-0.139876	-0.856635	-0.801591	-1.27802	-1.2612	0.970057	-1.70275	0.896493	-1.46467	0.12674	-0.0120304	-1.15443	0.755653	1.77473	1.59092
107861215	-0.684637	-0.667189	-0.553735	-0.382408	-0.700458	-0.462047	-0.674524	-0.202385	-0.386946	-0.719647	0.285656	-0.732947	0.0227326	-0.134462	-0.0110578	-0.735989	1.54258	-0.333139	-0.284101	-0.100059	-0.782784	1.76364	2.70172	2.23219
107872143	0.661098	-0.39377	1.10856	0.181668	0.935176	0.288669	0.421267	0.297942	-0.049347	0.0517322	2.04298	-0.77087	0.949345	0.22941	0.449156	-0.783646	0.340679	0.885024	0.0790152	-0.464287	-0.46012	-2.17691	-1.92582	-1.89695
107855110	-0.463887	-0.474518	-0.33125	0.281146	0.754616	0.8457	0.481837	-0.818391	-0.544953	-0.463217	-0.588488	-0.0998488	-0.726942	-0.739026	-0.491974	-0.29403	0.0219668	-0.775103	-0.885356	-0.44761	-0.757685	1.8809	1.46096	3.17516
107843544	-0.399227	-0.425149	1.06128	0.170016	-0.122643	-0.249996	1.06441	1.72832	1.1495	0.201951	-1.81827	-0.443669	-0.0219819	0.490344	-0.765757	0.604816	-1.65833	1.89813	-0.389256	-0.158755	1.19901	-1.02381	-1.19934	-0.891582
107863446	0.411732	0.763425	1.71771	0.219993	1.11982	0.484638	0.691331	-0.850948	0.118221	0.340342	0.583129	-1.2965	1.11382	0.899674	-0.276675	-0.864955	-1.25917	0.224103	0.1296	-0.713338	1.21104	-1.1278	-1.74704	-1.89215
107878613	0.490241	0.310284	0.280275	0.73558	0.296272	-0.0974896	1.27452	1.7551	1.49958	0.835829	-1.29525	-0.876209	-0.276611	-0.00500599	0.572527	-0.495192	-1.7431	-1.09078	0.266934	0.504057	0.886945	-0.492627	-1.82991	-1.50596
107839351	-1.10095	-1.13895	-1.16067	-0.102379	-0.333317	0.243798	-0.81256	-1.08578	-1.09197	-0.884003	1.92782	1.34344	-0.452772	-0.304105	-0.823032	0.847363	1.64149	0.658992	0.924653	-0.187515	-0.993208	1.28298	0.762992	0.83768
107870331	-0.873014	-0.453566	-0.990457	-0.205007	-0.241002	-0.208345	-0.420725	-0.0493309	-0.355553	-0.486381	-0.656438	-1.10592	-0.307542	-0.664579	-0.871042	1.07961	0.407468	1.35325	-0.396723	-0.475193	-0.255565	1.82823	2.88477	1.46306
107850547	1.13809	1.252	0.764131	-1.08207	-0.674925	1.10322	-0.271329	0.670896	0.62476	0.248275	-0.125204	0.422826	1.31097	1.37131	0.3574	0.54356	0.479637	-1.24595	-0.575834	-0.764044	-0.548731	-2.01635	-1.54015	-1.44249
107849702	-0.728703	-0.676729	-0.751569	-0.445939	-0.415272	-0.460658	-0.587248	-0.560005	-0.564194	-0.439445	1.13801	0.177616	-0.734575	-0.691365	-0.455142	-0.0621269	2.20689	0.504098	-0.616668	-0.667391	-0.725098	2.13905	2.06176	1.35471
107872833	0.309482	0.243168	0.018181	0.924356	0.817603	0.372621	-0.610529	-0.603005	-0.594906	-0.388334	0.364286	-0.705655	-0.661732	-0.792316	-0.719842	-1.07388	0.472177	-1.00722	-0.438408	-0.0790694	-1.65097	1.04764	2.42077	2.33558
107877740	-0.0127396	1.27514	1.04328	0.958356	0.163103	1.34671	0.823969	0.602655	0.392656	1.5811	-1.03734	1.3812	0.504462	0.0231239	-0.316763	-0.909804	-1.09004	-0.447176	-0.784809	-1.49083	-0.0533115	-1.69081	-1.22256	-1.03958
107873791	-0.673987	-0.702251	-0.702813	-0.668807	-0.627726	-0.671604	-0.6558	-0.592645	-0.477212	-0.0795685	-0.330014	-0.340796	-0.369847	-0.49183	-0.123865	-0.0502853	2.47239	0.176894	-0.475322	-0.248414	-0.294424	1.52611	1.9842	2.41762
107877544	-1.22516	-1.00666	-1.39446	0.865223	1.0512	1.52091	-0.943036	-0.256518	-1.01663	-0.550273	-0.0600717	-0.498305	-0.315511	-0.296396	-1.26955	-0.367965	-0.110525	0.873168	0.455654	-0.0681264	-0.260549	1.53629	0.993116	2.34417
107858833	0.284462	-0.466516	0.53855	-0.20187	0.0783592	0.121591	-0.689405	-0.737878	-0.242864	-0.0783122	-1.12568	-0.654306	-0.724713	-0.560208	0.142098	-0.0206369	-0.715733	-0.438538	-0.571923	-0.123347	-0.731863	3.16469	2.05833	1.69571
107875619	-0.0952716	0.147631	-0.734657	1.61917	0.926	2.09649	-1.03811	-0.0654832	-0.0120853	-0.740155	-0.722271	0.66454	-0.667117	-0.664464	-1.00734	-1.02998	-0.226986	-0.435778	-0.254062	-0.922881	-1.06459	1.80659	0.703142	1.71766
107855831	-0.629371	-0.691455	-0.887911	-0.250701	0.18622	-0.21402	-0.662067	0.195807	-0.156567	0.453591	-1.12304	-0.626008	-0.0963812	-0.175224	-0.0650192	-0.374671	0.0713115	-0.669247	-0.96369	0.00213998	-0.279763	1.91893	1.87794	3.1592
107843239	-0.433522	-0.366697	-0.484651	0.329017	0.787234	1.08462	-0.246607	-0.767929	-0.466468	0.685455	-1.63817	-0.784325	-0.0492199	-0.349544	-0.523575	-0.0355213	0.564813	-0.384279	-1.56111	-0.0417115	-0.99578	1.35216	1.70472	2.62109
107877342	-1.03494	-1.09532	-0.904567	-1.24341	-1.13142	-1.47525	-0.547298	-0.0626481	-0.391731	0.512021	2.07628	-0.336123	0.214967	0.226665	0.838203	-0.808037	1.50742	-0.0342306	-0.457378	-0.217139	0.595909	0.614331	1.77303	1.38069
107850485	-0.573975	-0.479058	-0.864895	-0.383541	-0.401439	-0.22079	-0.533855	-0.220422	-0.586938	-0.156498	-0.609111	-0.312792	-0.518801	-0.567211	-0.736655	0.578793	1.63614	0.180302	-0.705401	-0.467688	0.036092	0.483699	3.11504	2.309
107856727	-0.713362	-0.864215	-0.820025	-0.822443	-0.785657	-0.762708	-0.655502	-0.552586	-0.608105	-0.398426	1.009	-0.306116	-0.550748	-0.506911	-0.278249	0.64303	3.46717	0.206931	0.0473779	-0.0847999	0.0188309	0.974763	1.19936	1.14338
107861318	1.18816	-0.0459887	0.439655	-0.699803	-0.866554	-0.422046	-0.621448	-0.817265	-0.468003	0.675414	-0.634718	0.900594	-0.818516	-0.859837	0.0233566	-0.547122	1.25738	-0.0643331	-0.886827	-0.897618	-1.01358	1.2072	2.92714	1.04476
107843794	1.42084	1.3589	1.27589	-0.847203	-1.08975	-1.36447	1.26691	0.348898	0.771261	-0.441448	0.465416	0.661106	-0.381673	-0.120186	1.25299	0.105947	-0.0657104	-0.442997	-0.499421	-0.782394	1.33247	-1.25034	-1.45913	-1.51594
107850247	0.775965	0.522216	0.814992	0.636346	-0.279465	0.568425	0.670941	0.46602	0.190951	-0.20623	-0.223807	0.359656	1.66223	0.883532	-0.182869	-1.69358	-0.348654	0.221416	0.919059	-0.0739368	0.198361	-1.6155	-2.64006	-1.62602
107870257	-1.22832	-0.816619	-0.789366	0.32408	0.541899	1.0547	-0.791726	-1.086	-0.357822	0.531048	-2.29028	-0.0832008	0.500279	-0.508287	-0.843269	0.790966	-1.06755	1.78607	-0.12655	1.16224	0.0148862	0.957426	1.33459	0.990815
107863022	1.90995	0.463189	1.30558	-0.668552	-1.07944	-0.530797	1.06913	-0.400547	0.788964	-0.108957	-0.0569558	1.26471	0.420494	1.45862	0.358225	-0.850243	0.344779	-1.19253	0.365631	0.132757	-0.46927	-1.6176	-1.24367	-1.66347
107870498	0.778825	1.53458	1.1129	0.168715	0.796167	0.129654	0.473531	1.68491	0.932206	-0.725474	-1.28644	-0.444095	0.732532	0.374917	-0.140828	-0.963382	-1.13627	-0.960907	0.332628	-0.298299	1.23318	-1.39569	-1.4661	-1.46727
107861427	-0.63006	-0.48225	-0.664924	-0.00760921	0.510067	-0.319764	-0.463662	-0.176849	-0.263764	-0.580678	-0.491503	0.0114804	-0.634953	-0.614086	-0.0209954	-0.209898	-0.477078	-0.506328	-0.339775	-0.592905	-0.49046	2.31278	2.3107	2.82251
107868862	0.91474	0.900738	0.950456	0.961185	0.780831	1.16685	-0.103786	0.697253	0.563022	1.86414	-1.18178	-0.777962	0.851542	0.266284	0.813191	-1.10113	-1.17355	-1.05608	-1.20626	-0.363068	-0.207284	-1.0131	-0.9549	-1.59132
107840196	-0.911944	-0.74826	-0.588428	1.22916	1.26795	1.07277	-0.723727	-1.18402	-0.957471	0.0125558	-0.342188	-1.44923	-0.323387	-0.516795	-0.826765	0.235263	-0.8322	-0.522825	0.200369	1.09131	-0.00944145	1.62919	0.944451	2.25366
107842753	-0.72531	-0.898322	-0.837608	0.208458	0.353543	0.243548	-0.719228	-0.783797	-0.871539	-0.372358	-0.103873	-0.132765	-0.650269	-0.623748	-0.341885	0.0364081	-0.138841	0.0507074	0.400881	-0.345223	-0.801795	2.41407	1.99012	2.64883
107856610	-0.7903	-0.288418	-0.764454	-0.249088	-0.126317	-0.496017	-0.487687	0.505241	-0.170018	0.142354	-0.998859	-0.872951	0.180211	-0.29001	-0.394611	-0.639596	-0.790085	-0.308869	-0.361879	0.198719	-0.117814	2.04132	2.07552	3.00361
107868709	-0.096321	-0.31561	-0.74154	1.3467	1.12128	1.06868	0.254582	0.142275	-0.132486	1.31935	-1.92439	-1.00559	-0.808571	-0.540357	0.00613095	-0.295916	-0.444012	-0.780627	-1.04373	-0.898824	-0.509284	2.23547	0.526311	1.51646
107851586	-1.03144	-0.957652	-1.01602	-0.276491	-0.438186	0.341352	-1.07943	-0.95504	-0.896976	-0.734938	2.28928	0.856751	-0.221181	-0.604844	-0.234555	0.889576	0.714737	-0.0732879	1.68314	-0.499112	-1.05295	1.01329	0.59343	1.69055
107868023	-0.0578305	-0.00900748	-0.519992	-0.59284	0.320505	-0.405595	-0.107382	0.0487065	-0.250047	-0.767691	0.213435	-0.777783	-0.959505	-0.898784	-0.145131	0.118702	-0.088547	0.108142	-0.803227	-0.343847	-0.913859	1.40652	3.3107	2.11436
107840304	-0.730847	-0.782516	-0.807609	-1.1796	-1.00943	-1.05423	-0.249161	-0.218474	-0.123114	-0.235886	-0.0350514	0.014118	-0.627574	-0.342155	1.19688	0.22891	0.684696	-0.0328582	-0.479577	-0.357403	-0.37676	2.51155	1.68697	2.31912
107867299	-0.992814	-0.810135	-1.01911	-0.237131	-0.184939	-0.175368	-0.84188	-0.738576	-0.799337	0.286531	0.441443	0.45795	-0.740354	-0.54332	-0.499664	0.219011	1.0944	-0.081864	-0.439405	-0.221217	-0.466214	2.51831	1.00611	2.76757
107854436	-0.988803	-0.962539	-1.06369	-0.481016	-0.528264	-0.167005	-0.525604	-0.589638	-0.573538	-0.362722	2.02954	0.109317	-0.694132	-0.756709	-0.430673	0.553406	1.74643	0.396481	-0.329595	-0.569993	-0.774643	1.34658	1.62178	1.99502
107859044	0.743645	0.622717	0.866666	1.21903	0.648909	1.74293	0.559662	0.140947	0.456831	1.41887	-0.980219	1.21211	0.180474	0.0179157	0.275202	-0.349178	-0.869623	-0.991354	-1.37849	-0.816347	-0.220264	-1.48305	-1.3642	-1.65318
107842415	0.741107	1.4555	0.263624	0.123739	0.839156	0.386107	1.20685	0.668656	0.615446	0.257579	-1.53158	0.99498	0.767271	0.734931	0.938663	-1.13503	-1.10675	-0.934635	-0.808095	-0.401304	0.560458	-1.59776	-1.60496	-1.43396
107866002	-0.75219	-0.74154	-0.629227	0.329986	0.50939	0.63286	-0.745597	-0.770812	-0.835617	0.676878	0.404006	-0.301291	-0.845009	-0.902767	-0.968706	0.445259	0.336544	0.629181	-0.841147	-0.926631	-0.863137	2.14457	2.09048	1.92451
107839792	0.826725	0.844745	1.02543	-0.38824	-0.13643	-0.137825	1.2129	0.768603	0.933829	0.553008	0.984914	0.2743	1.11857	0.686922	-0.519985	0.2117	-0.641584	-1.5405	-0.733565	0.265053	0.0237832	-2.09368	-1.79674	-1.74193
107845803	-0.438081	-0.328175	0.282014	-0.369262	-0.584423	-0.308026	-0.35496	-0.525235	-0.66726	-0.30035	0.164723	0.501595	-0.818686	-0.870719	-0.404874	-0.246529	0.14438	-0.71379	0.29956	-0.444902	-0.564616	0.650564	2.60848	3.28858
107851783	-0.369967	-0.419501	-0.422103	-0.422454	-0.413653	-0.424173	-0.418668	-0.423805	-0.389555	-0.4191	-0.34297	-0.405523	-0.417129	-0.417558	-0.362984	-0.343119	0.176511	-0.408704	-0.349912	-0.32508	-0.339597	2.9996	2.43655	2.22289
107846243	1.2938	0.140505	1.06074	-1.10836	-1.4592	0.446062	1.99439	-0.07621	0.624883	-0.0962437	0.295236	0.539123	0.427784	0.729114	0.756111	-0.152754	-0.207516	-0.871079	-0.0848655	-0.223033	1.02683	-1.40006	-1.83241	-1.82284
novel.2297	-0.484102	-0.303229	-0.436579	-0.501273	-0.515219	-0.513918	-0.346806	-0.349929	-0.24681	-0.54338	-0.200476	-0.122279	-0.462118	-0.474991	1.00201	-0.457238	-0.0995101	-0.535457	-0.529275	-0.505308	-0.519063	1.52789	3.1121	2.50496
107845411	-0.804238	-0.875991	-0.925572	-0.334776	-0.129665	-0.48402	-0.817379	-0.831073	-0.755283	0.20385	0.717488	-0.32107	-0.602339	-0.616058	-0.293322	-0.0331731	2.22145	0.657093	-0.361013	-0.497116	-0.761572	1.85559	1.94596	1.84224
107854232	0.00741163	0.65077	0.137062	0.300387	2.39984	-0.776518	-0.0292358	1.43622	0.860035	-1.11447	-1.21106	-1.22541	0.360952	0.0565849	0.421987	-0.596626	-1.11367	2.13635	-0.389954	-0.295309	0.393413	-0.964768	-1.07727	-0.36673
107867281	1.15792	1.10935	0.981501	-0.188415	-0.173407	0.731157	0.285901	0.795715	0.402776	1.74552	-0.530785	-0.0852171	0.0521526	-0.0976877	0.44374	-0.53121	-0.575951	-1.78182	-0.234273	-0.759489	1.77476	-1.38054	-1.44507	-1.69662
107874104	0.735551	-0.0264754	0.292418	1.02996	1.09575	0.302491	0.206335	1.0256	1.04814	0.939669	-0.162299	0.522237	0.868381	0.946689	-0.582914	-0.547169	-1.60185	-1.85209	-0.406311	0.818349	0.0192415	-1.32857	-1.37959	-1.96355
107863615	0.812797	0.433	-0.355711	-0.771476	-0.285018	0.168547	0.483014	0.801284	0.109644	-1.78621	1.69295	1.80024	0.115917	-0.383107	1.22017	-0.119763	-0.34421	-0.513565	1.26508	-0.536842	0.666237	-1.60503	-1.24845	-1.6195
107862686	0.448063	0.525315	0.876586	-1.25789	-0.897505	-1.1876	0.099059	0.622783	0.231831	-0.987894	-0.894017	-0.52745	0.0100651	-0.144439	0.577692	-1.1811	1.42371	-1.3265	-0.428406	-0.618374	-0.430205	1.36011	1.38034	2.32581
107851445	0.0302826	0.556075	1.53106	-0.30166	-0.0547214	0.535732	1.11249	0.561166	0.447583	0.442431	-1.89048	1.69881	0.369085	0.861149	0.249994	0.445159	-1.74174	0.175763	-0.334266	-0.550831	0.356678	-1.36286	-1.43909	-1.6978
107846598	1.58525	0.822445	2.14795	-0.216911	-0.713288	0.420622	0.17803	-0.779541	-0.21583	-0.429707	-0.768484	-0.30752	-1.09534	-0.987306	-0.606724	0.0781235	-0.968841	-0.751462	-0.0784614	-1.06224	-0.653206	0.72539	1.90389	1.77316
107851343	-1.23133	-0.388144	-1.12213	0.955801	1.18468	1.87207	-0.502872	-0.406019	-1.12126	-0.0695544	-1.16446	0.758657	-0.20947	-0.311504	-0.368214	0.361118	-0.380047	-1.776	0.729694	-0.157197	-0.561603	2.08782	0.755426	1.06455
107867800	-0.545336	-0.541347	-0.55229	-0.56227	-0.557642	-0.564776	-0.517815	-0.432755	-0.434615	-0.555055	-0.122119	-0.473005	-0.400495	-0.43775	0.174506	-0.315855	0.574253	-0.207124	-0.295432	-0.206299	-0.413583	1.83949	2.91779	2.62952
107850480	-0.358938	-0.377182	-0.459164	-0.429787	-0.334015	-0.449947	-0.549246	-0.294109	-0.387482	-0.515392	0.0784668	-0.411814	-0.510124	-0.505213	-0.376953	0.204968	0.2509	-0.426799	-0.331906	-0.447448	-0.0914605	3.89993	1.95122	0.871494
107838791	-0.141765	-0.684894	-0.675933	-0.709436	-0.885376	-0.715945	0.282379	0.424835	0.756133	-0.740628	1.33014	0.428041	-0.964812	-0.878797	0.252634	-0.298746	0.109393	-0.648175	-0.268645	-0.885859	-1.04027	1.96837	1.33422	2.65314
107862656	0.167007	-0.237373	0.369398	0.133803	-0.288276	-0.545413	-0.591041	0.149353	-0.460838	-0.354666	-0.371823	-0.566014	-0.608628	-0.994564	0.895895	-0.863525	0.708958	0.596865	-1.721	-1.40893	0.112703	1.74431	1.39637	2.73743
107873507	-1.06955	-1.00405	-1.01009	-0.491824	-0.661031	-0.571767	-0.731942	-0.27008	-0.141451	-0.639704	-0.234447	-0.235428	-0.421852	-0.404123	-0.254972	0.767405	-0.172331	0.113521	0.210118	0.310428	-0.0919488	2.17112	2.2057	2.6283
107873469	-0.0816222	-0.214824	-0.18298	-0.711384	-0.717198	-0.702945	-0.229952	-0.504547	-0.210326	-0.326767	-0.599439	-0.458438	-0.519626	-0.53061	0.301304	-0.440783	-0.256263	-0.453933	-0.334458	0.000609409	0.0614255	1.54077	3.57647	1.99552
107876000	0.5252	-0.190089	0.648917	-0.441184	0.363719	-0.663875	0.265582	-0.793629	0.546038	1.07839	-0.575753	-0.76726	-1.45746	-1.12041	1.04427	0.338088	-1.14048	-0.91232	-0.57911	-0.136202	-1.1808	1.16863	1.41231	2.56744
107872288	0.00767115	0.243813	-0.340292	0.20065	0.219842	0.47996	-0.590985	-0.603818	-0.822279	-0.226039	-0.0812795	-0.612934	-0.878049	-0.887774	-0.370829	-0.422482	0.281792	-0.617219	-0.854104	-0.501859	-0.708886	2.18611	2.24472	2.65427
107871112	1.12137	0.89868	0.884853	-0.24906	-0.363859	0.191551	-0.493791	-0.928056	-0.536675	-0.702866	-0.671616	-0.71771	-0.946222	-1.12145	1.13498	-1.28689	0.783296	-1.05233	0.146389	0.115047	-0.921908	0.805548	1.22431	2.68642
107858093	-1.3499	-1.10984	-0.82319	-0.655828	-0.952073	-1.17722	-1.06868	-0.493474	-1.02787	-0.372918	0.832325	0.482387	-0.616236	-0.303202	-0.340359	1.56161	2.18377	0.713273	1.06979	0.458153	0.111515	0.841806	1.5599	0.476255
107866635	-0.535719	-0.556617	-0.643326	-0.415109	-0.420432	-0.465477	-0.632248	-0.600614	-0.464782	-0.455467	-0.265209	-0.370096	-0.487799	-0.574125	-0.286048	0.00879784	-0.370113	0.0247077	0.44836	-0.0749441	-0.210712	3.22448	1.83823	2.28425
107856993	0.133793	-0.582483	0.154068	-0.0177423	1.14635	0.30959	0.0338418	-0.40612	0.572967	-0.0167869	-1.31391	-1.17045	-0.307271	-0.754134	0.0686686	-0.362546	-0.671625	-0.313907	-0.983375	-1.30588	-0.0137845	0.852168	3.03377	1.91479
107840328	0.265832	-0.166365	0.115293	-0.47097	-0.40812	-0.54526	-0.216045	-0.203006	-0.145975	-0.574589	-0.647487	-0.694648	-0.462516	-0.517945	-0.282002	-0.456593	-0.164108	-0.473658	-0.345057	-0.431897	-0.430509	1.67525	3.48747	2.09291
107860027	-1.25559	-1.03242	-1.05222	-0.233629	-0.494384	-0.302728	-0.793266	-1.07274	-1.14234	-0.167513	1.32493	0.559721	-0.350448	-0.523287	-0.85699	1.28193	1.29925	1.19589	0.519774	-0.566354	-0.69912	1.29462	1.12933	1.93759
novel.3789	0.346805	0.466474	0.681267	-0.224514	-0.472566	0.0283055	0.458015	1.01649	0.313406	-0.69305	2.99059	-0.394539	0.340948	-0.470024	0.570114	-0.855968	-0.507378	-0.89103	0.768194	0.622966	0.228621	-0.511748	-1.88717	-1.92421
107858577	-0.371822	-0.556259	-0.190288	-0.839821	0.27029	-0.277517	0.419235	-0.621381	-0.41145	2.2891	-1.22725	0.279652	-0.790257	-1.10074	-0.50576	0.869101	0.366216	-0.306083	-1.10776	-0.884942	-0.442737	1.71668	1.62314	1.80065
107879896	-0.762591	-0.58966	-0.494457	-0.486445	0.400514	-0.467115	-0.474716	-0.652522	-0.375375	-0.744181	0.955536	-0.48546	-0.727146	-0.464769	-0.235579	0.641929	-0.337885	1.37921	-0.795873	-0.79438	-0.746106	1.78075	2.72644	1.74988
107861234	-0.364104	-0.250603	-0.541272	-0.116708	0.131824	-0.118914	-0.850682	-0.780356	-0.799625	-0.989111	1.56716	-0.588913	-0.736188	-0.791981	1.0245	-0.777988	0.246933	-0.727958	0.264069	-0.132323	-0.527305	1.21236	1.74692	2.90026
107870660	1.03224	0.194192	0.369195	-0.605872	-0.414481	-0.378093	-0.385884	-0.579845	-0.596378	-1.17895	0.257977	-1.19529	-1.10804	-0.71496	1.08238	-0.747788	0.433157	-1.19944	-0.0930457	-0.146505	0.484682	2.11998	0.732387	2.63837
107872614	-0.725217	-0.719312	-0.68794	0.370604	0.203767	0.291388	-0.675962	-0.740026	-0.663667	-0.326024	0.675834	-0.612953	-0.659521	-0.734524	-0.696762	-0.32393	1.55167	0.0634972	-0.631298	-0.584949	-0.624004	1.40172	2.33819	2.50942
107849632	-0.726784	-0.657371	-0.713723	-0.722197	-0.721066	-0.728078	-0.696099	-0.53476	-0.546735	-0.375622	-0.0225288	-0.460689	-0.344125	-0.366847	0.131469	-0.182899	0.525089	-0.0310926	0.397464	-0.151623	-0.302461	2.8061	2.31194	2.11264
107866053	-0.342317	0.343039	-0.162183	-0.641734	-0.422361	1.51822	-0.258595	-0.93123	-1.08301	0.0217083	-0.755137	1.99901	-0.533031	-0.113082	-0.998206	-0.212088	-0.758263	0.51622	-0.405183	-0.495492	-1.18972	0.762298	2.13923	2.00192
107845559	0.175266	0.329546	-0.0236014	-0.560764	-0.250352	-0.95332	-0.00406337	1.28072	-0.00963407	0.50955	-1.3652	-0.918747	-0.511439	-0.642891	-0.611103	0.427908	-0.457681	-0.867685	-1.27978	-0.496181	0.158419	1.50015	1.99693	2.57395
107877772	0.749741	0.873922	0.0564986	0.784082	0.263008	1.89353	0.313914	0.827693	-0.281312	0.98255	-0.647338	1.59433	0.622219	0.593009	0.069983	0.220574	-1.61896	-1.36089	-0.693152	-0.430958	-0.418991	-1.25419	-1.52041	-1.61885
107842608	-0.862141	-0.742199	-1.22743	-1.24102	-1.13691	-1.20412	0.165388	-0.248251	-0.259343	-1.1735	0.379044	-0.0582027	-0.676397	-0.463149	0.935398	-0.10503	2.00669	0.966549	0.628551	0.553305	-0.624304	1.82906	1.34635	1.21166
107877741	-0.338695	-1.06848	-0.78644	0.296137	-0.180023	0.277693	-0.769159	-0.440993	0.23238	0.364784	-0.385408	-0.236381	-0.057878	-0.13913	-0.0411642	-0.466076	1.01203	-0.944907	-0.849842	-0.0171112	-1.51951	1.76058	1.09382	3.20377
107865675	-0.361155	-0.57361	0.00428722	-0.380096	-0.323163	-0.615593	-0.324793	-0.800627	-0.381118	-0.426567	0.165241	-0.455108	-0.931291	-0.85902	-0.638795	2.08754	0.853316	0.0892799	-1.09106	-0.977505	0.116382	2.09063	1.86	1.87283
107854756	-0.757412	-1.02743	-1.0893	-0.151784	0.168916	-0.319181	-0.0816044	-1.11029	-0.99054	0.429301	1.34012	0.915435	-0.672625	-0.790148	-0.426912	0.281565	1.04282	1.07789	-0.846798	-0.550162	-0.919003	0.929191	0.682525	2.86544
107862738	-0.519781	-0.46371	-0.778424	-0.912731	-0.489168	0.131926	0.390583	-0.910583	0.360955	-0.110763	0.205669	0.690515	0.343911	2.53153	0.418396	-0.0520663	0.202374	1.75088	0.289318	1.42827	-0.13279	-1.10495	-2.20822	-1.06114
107859729	-0.435154	-0.689959	-0.52475	-0.79292	-0.68308	-0.756093	-0.186072	-0.488291	-0.434644	0.571342	-0.135534	0.592439	-0.521326	-0.62451	-0.616013	0.050091	0.969202	-0.225802	-0.779742	-0.349856	-0.794058	2.27033	1.99498	2.58942
107864578	0.659985	-0.698845	0.778684	-0.717823	-1.06257	0.276356	1.32859	-0.972299	-0.73612	0.791182	-1.42305	0.578799	-0.081226	0.179279	-0.303227	-0.80451	0.738852	-1.08778	-0.935179	0.87785	-1.43105	1.64263	0.271065	2.13041
107848021	-0.602391	-1.12334	-0.260122	-1.48528	-1.83182	-1.398	-0.46921	-0.369273	-0.699231	0.0919098	1.80096	-0.248388	-0.408437	0.163442	-0.481612	0.799125	0.722226	0.468422	1.45909	-0.196894	0.172494	1.12607	0.872903	1.89736
107848844	0.0863438	-0.396845	-0.287712	1.15316	1.06651	-0.238256	-0.504683	0.186572	-1.32341	0.533507	-0.963003	-0.963679	-0.529142	-0.697181	0.192083	-1.01007	0.461112	0.727164	-1.18365	-1.11975	-0.603939	1.12999	2.19503	2.08985
107840028	0.380998	0.995718	0.665107	0.162878	-0.449847	-0.171167	1.41134	1.75695	0.807743	-0.199807	-0.929268	0.0729924	1.23659	0.903712	0.13242	-0.595057	-2.01271	-0.95385	-0.497818	-0.199367	1.25048	-0.941573	-1.65016	-1.17631
107875997	-0.926154	-0.424382	-0.581658	0.751013	0.0798204	0.619611	0.552888	-1.0567	0.115186	-0.0670252	-0.476149	2.33199	0.169284	1.55194	1.29447	0.175327	0.457519	1.03794	0.187099	-0.220021	-1.23815	-1.51296	-1.05683	-1.76408
novel.3258	0.131903	0.201026	-0.341969	-0.353863	-0.353295	-0.501377	-0.494935	-0.462768	-0.395364	-0.115758	-0.420004	-0.108281	-0.724612	-0.691479	-0.159434	-0.230528	-0.21073	-0.463081	-0.674753	-0.569703	-0.571878	2.80293	2.59947	2.10849
107878085	-0.821706	-0.537753	-0.798629	-0.485288	-0.215226	-0.674947	-0.739241	-0.634405	0.0506181	-0.649106	0.0148077	-0.0951757	-0.067589	-0.471057	1.76878	-0.195821	0.449758	-0.591394	-0.025871	-0.383978	-0.786625	1.91594	0.762373	3.21154
107852194	-0.775875	-0.474621	-0.895054	0.943279	1.6976	1.24319	-1.2948	-0.00705987	-0.937286	0.533004	-0.685122	-0.422431	-0.0490026	-0.625428	-0.524594	-0.0064564	-0.677086	0.301066	-1.36499	-0.583564	-0.339233	2.3883	1.10514	1.45102
107847460	-0.24803	-1.05669	-0.0111144	-0.306888	0.704354	0.181999	0.870803	0.0873773	-0.9154	-0.698726	-1.16998	0.352011	0.970368	2.21701	-0.193041	-0.64398	0.592874	1.38384	0.197107	1.27384	0.744316	-0.877566	-1.52003	-1.93445
107856707	1.96802	0.351232	0.568318	0.0665128	0.03505	0.0192654	0.614177	1.089	0.354917	0.154455	1.48016	-0.800575	0.456973	0.239599	0.498301	-0.824178	-1.09227	-0.821408	0.653694	0.477758	0.0691769	-1.70614	-1.72876	-2.12328
107849713	-0.64273	-0.692455	-0.603563	-1.04827	-1.04371	-1.01173	-0.413051	-0.574292	-0.486022	-0.25168	0.252727	-0.363534	-0.440495	0.0200445	1.74673	-0.359599	3.30937	0.195893	0.303032	-0.423954	-0.293952	0.746154	1.2639	0.811198
107875761	-0.16122	-0.152729	-0.167848	-0.500108	-0.68239	-0.139807	0.339351	-0.147087	0.140156	-0.500755	0.972213	0.204785	0.305684	0.378892	0.1181	2.02028	-0.791263	-0.265952	2.4942	0.550541	0.959084	-1.49968	-1.60562	-1.86883
107872827	0.251023	0.122465	-0.771259	-1.05495	-0.890617	-1.19337	0.117603	0.981971	0.904906	-0.462909	-0.485649	-0.81493	-0.966092	-0.874852	1.60792	0.462472	-0.627795	-0.220337	-0.169485	-0.766813	-0.598066	2.02548	1.3887	2.0346
107875635	0.405148	0.350261	0.306415	0.179664	-0.022914	0.281962	1.45806	-0.53558	-0.0794187	-0.838944	2.54389	0.560853	0.944294	0.2472	0.318666	-0.980139	-0.188661	-0.575592	1.31949	0.103039	-1.59537	-1.46249	-1.4862	-1.25365
107852433	-0.819531	-0.794211	-0.864912	0.153053	0.0643513	0.157275	-0.875218	-0.855195	-0.683376	-0.158696	0.294818	1.31505	-0.870627	-0.750571	-0.278816	1.82738	0.387125	-0.164491	-0.692226	-0.786651	-0.778889	0.998128	2.7024	1.47383
107868118	1.81069	0.242753	1.38728	-1.44074	-1.1499	-1.07148	1.06116	0.102127	0.521279	1.07886	1.44027	-0.103199	0.511805	0.207042	0.239652	-1.21983	0.878231	-0.417903	-0.269419	-0.293482	0.303024	-1.09703	-0.821147	-1.90005
novel.7004	1.0221	0.936155	2.21483	0.0314607	0.104851	1.53093	0.172605	-0.0151721	0.460673	0.309049	-0.723216	0.835713	0.128006	0.811854	-0.16727	-0.413484	-1.14266	-1.28733	-1.27603	-0.59168	1.02182	-1.49642	-1.47523	-0.991547
107847991	1.1184	1.94575	0.369039	-0.996457	-0.259302	-0.900041	-0.788206	0.492411	-0.543876	-0.384187	-0.496697	-0.599622	-1.26399	-0.701368	0.913361	-1.25966	-0.233282	-0.0168119	-1.25536	-0.403151	0.815984	1.71427	1.81419	0.91861
107850788	0.751497	0.367818	0.403346	-0.229127	-0.110178	-0.0705735	-0.407351	-0.261721	-0.27647	-0.585477	-0.841979	-0.497014	-0.8679	-0.906052	-0.58441	-0.536082	0.489254	-0.73535	-0.833977	-0.750202	-0.417931	2.63635	2.16841	2.09512
107862047	-0.64909	-0.243803	-0.492443	-0.320137	-0.370168	-0.114249	-0.214002	-0.136171	-0.00464487	0.0433206	-1.23792	-0.602556	-0.331665	0.0890676	0.63259	-0.305058	-0.394005	-1.14615	-0.696801	-0.203747	-0.207547	1.33775	3.03326	2.53417
107862064	-1.70852	-0.991632	-0.990202	1.4299	1.65909	1.84506	-0.738166	-0.232377	-0.91022	1.22372	-1.13395	-0.68503	-0.0584788	0.041633	-0.174756	0.376099	0.239759	-0.416592	0.117217	-0.647537	-0.717795	0.531659	1.89593	0.0451747
107874725	-0.654451	-0.667051	-0.647581	-0.5859	-0.608196	-0.621437	-0.564805	-0.660478	-0.598828	-0.427018	0.973299	0.847418	-0.646558	-0.595438	-0.364009	-0.0844349	2.6119	-0.260757	-0.422844	-0.510457	-0.606772	1.49587	1.39657	2.20196
107856396	-0.853833	-0.908433	-0.899288	-0.0143656	0.0847336	0.0287599	-0.83441	-0.71232	-0.825285	-0.216583	0.934063	0.2413	-0.614478	-0.742589	-0.861929	0.354739	0.670662	-0.128851	-0.236382	-0.215231	-0.824913	2.12357	1.83563	2.61544
107856475	-0.683524	0.737877	0.579283	-0.821852	-1.23358	1.43585	0.421266	1.09537	-0.296266	-0.0680873	0.137458	-0.0992551	2.38124	0.623478	-0.897154	0.47982	0.457935	-0.163908	-0.813161	0.423828	0.354534	-0.334529	-1.31995	-2.39667
107860337	-0.859262	-0.821503	-0.767796	-0.529613	-0.562497	-0.0814274	-0.669418	-0.832377	-0.740553	-0.139862	1.50558	2.26758	-0.60433	-0.408608	-0.108715	0.273448	0.545235	-0.279081	-0.510507	-0.532206	-0.96823	2.38747	1.47542	0.961263
107854260	-0.812081	-0.500296	-0.141443	-0.400189	0.143309	0.330988	-1.00326	-0.64085	-0.406981	-0.609362	-0.890302	-1.03914	0.136555	0.283815	-0.122046	-1.29459	-0.579865	0.730801	0.0151479	0.0756623	-0.0329486	2.05539	2.41555	2.28613
107854243	-1.27633	-1.04814	-0.985252	0.408586	0.904472	0.0162175	-1.01023	-0.183008	-1.02289	-0.791218	-0.0742355	-0.611712	0.438001	-0.274987	-0.913146	0.239125	-0.885186	1.44302	0.501666	0.0178112	-0.519315	2.06657	1.61256	1.94762
107859623	-0.639033	-0.681757	-0.629093	0.00291526	-0.133667	-0.3019	-0.58965	-0.623862	-0.59508	-0.247621	-0.488767	0.382678	-0.625417	-0.630942	-0.493067	-0.207352	1.26117	0.224344	-0.482723	-0.470081	-0.686616	1.33702	2.15333	3.16517
107859235	-0.347778	-0.566507	-0.474286	-0.625132	-0.577767	-0.55701	0.309878	-0.387309	-0.33827	-0.476618	-0.597684	0.298717	-0.465541	-0.294109	1.00178	-0.455497	-0.390143	-0.52256	-0.435239	-0.278342	-0.649744	1.86866	1.52097	3.43953
107864521	-0.800635	-0.803982	-0.799478	-0.660797	-0.544132	-0.686571	-0.773574	-0.731473	-0.688831	-0.360896	0.471003	-0.418577	-0.569875	-0.519669	-0.382753	0.253992	1.10758	1.56477	-0.370382	-0.403871	-0.110104	2.08536	2.14245	2.00044
107843112	0.335546	-0.537698	-0.0672689	-0.685467	-0.790951	-0.597525	0.328542	-0.327483	0.313905	0.0405986	-1.05418	0.878675	-0.927943	-0.974688	0.557553	0.434713	-0.625037	-0.980718	-0.385275	-0.438572	-0.880784	1.7555	1.88476	2.7438
107846727	0.720988	0.622449	0.701312	-1.00801	-0.736206	-0.899681	0.482768	1.23281	1.36825	-1.39133	2.51808	-1.03876	0.423109	0.178954	0.451426	-0.489393	-0.0281149	-0.758754	0.979331	-0.128292	0.245674	-1.21045	-1.21995	-1.01621
107840155	-0.632181	-0.489942	-0.647812	-0.694082	-0.66985	-0.645745	-0.438548	-0.475699	-0.562513	-0.501058	-0.63256	2.79721	-0.175766	-0.0593025	-0.286611	0.905937	-0.43141	-0.0911592	-0.371708	-0.486956	-0.700057	1.80339	1.57629	1.91013
107872278	-0.418789	-1.12869	-1.12178	-0.277907	-0.579185	0.191897	-0.569991	-0.865861	-0.929571	0.103875	-0.820658	0.0497975	-0.0971303	-0.179651	-0.20098	-0.316684	0.252087	-0.344431	0.664673	0.152653	-0.507297	2.31231	2.14387	2.48744
107848493	-0.389642	-0.166426	-0.0617505	-0.130514	-0.307631	0.32156	0.110683	-0.653985	-0.541413	-0.0377159	-0.658724	-0.288703	-0.410349	-0.363357	-0.779058	-0.630427	-0.302226	-0.468265	-0.684119	-0.222301	-0.55819	1.53584	2.40904	3.27767
107863171	-1.07972	-1.02422	-0.672674	-0.819767	-0.676264	-0.720559	-0.423713	-0.731122	-0.931314	-0.271234	2.879	0.30064	-0.348041	-0.390405	1.24597	0.324368	0.592053	-0.0610527	0.0206757	-0.389579	-0.666524	0.919904	0.892441	2.03114
107842662	-0.686022	-0.600176	-0.632982	-0.498332	-0.956762	-0.50889	-0.546076	-1.00475	-0.869995	-1.16762	1.95125	-0.244882	0.256226	0.912178	-0.782285	-0.507059	2.53544	0.218032	1.32416	-0.370178	-0.374238	0.230956	1.27946	1.04253
107860397	-1.08728	-1.23402	-0.087052	-1.18252	-0.500356	-1.06859	-0.752287	-0.862909	-0.865269	-0.97898	0.374039	0.638359	0.519843	-0.473739	-0.0071816	1.52944	2.39454	0.571778	0.499989	0.161823	-0.768197	1.36916	0.330586	1.47883
107868410	1.11958	0.648349	0.688126	1.10605	0.559231	1.30749	0.772851	0.174598	1.50115	0.971048	-1.69682	0.388075	-0.141302	-0.127226	0.000319283	-0.969896	-0.907712	-2.05005	0.802389	-0.497826	-0.300863	-0.986768	-1.23962	-1.12117
107852890	-1.07476	-1.14623	-1.15537	0.242324	0.126806	0.187255	-1.05628	-0.836329	-0.709365	-0.5192	-0.268683	-0.569775	0.585503	0.006992	-0.681983	-0.271746	1.33871	0.440638	-0.653302	1.62251	-0.838429	1.33448	2.17167	1.72456
107842808	-0.684001	-0.729977	-0.739016	0.110857	0.642	-0.202428	-0.814372	-0.590669	-0.489882	-0.337326	0.781897	-0.0291189	-0.858447	-0.819289	-0.497267	0.0548024	1.79146	0.185907	-0.786503	-0.864901	-0.904183	1.5534	1.57686	2.65021
107844014	-0.713143	-0.833139	-0.899742	0.0598528	1.03818	0.393189	-0.659006	-0.426536	-0.707604	0.0411112	-0.552289	-0.259146	-0.903704	-0.86774	-0.658114	1.5523	-0.285997	-0.681113	-0.499134	-0.644484	0.556097	1.6811	1.69261	2.57645
107860809	-0.741955	-0.443394	-1.38753	0.124587	0.016378	0.716046	0.086173	-0.603407	-0.849469	0.29136	-1.20965	-0.531563	-0.714384	-0.47495	-0.0417873	1.74273	0.208199	-0.161464	-0.315831	-0.143501	-1.10586	2.26408	0.863542	2.41165
107867537	-0.53855	-0.539641	-0.811603	0.769744	0.330052	0.671038	-1.04475	-0.39547	-0.555702	1.00293	-0.254842	0.410696	-1.13792	-0.268193	0.210056	0.219839	0.134066	-0.383371	-0.939401	-1.54078	-1.13019	1.91262	1.45426	2.42511
107866432	-0.818057	-0.621806	-0.841932	-0.470933	-0.207146	0.160201	-0.733418	-0.849614	-0.89146	0.295453	0.915419	0.163754	-0.967012	-0.888214	-0.421428	0.583324	1.95129	-0.256232	-0.712231	-0.477574	-0.583002	2.01497	1.77274	1.88291
107875679	-1.22728	-1.18099	-1.11109	-0.0894875	-0.435341	0.00940652	-0.798406	-0.90216	-0.709786	-1.0817	1.9877	0.311414	-0.505832	-0.323375	-0.250052	0.982577	2.32611	0.833083	-0.0144986	-0.0741835	-0.716749	0.776047	0.612172	1.58242
107866773	0.580806	-0.62496	-0.163422	-1.4093	-1.63142	-0.856233	1.46878	-0.547375	-0.393837	0.452763	-0.831151	1.7012	-0.0210248	-0.833054	0.388039	-0.451801	2.27535	-0.0366376	0.0846736	-0.685505	-0.962824	1.50286	0.299324	0.694746
107870923	-0.566715	-0.561604	-0.606648	-0.458569	-0.528451	-0.407131	-0.573677	-0.577994	-0.605559	-0.24069	0.00994538	0.423481	-0.583195	-0.563468	-0.545414	-0.132512	1.69819	-0.112595	-0.555903	-0.535821	-0.539939	1.60769	2.95131	2.00527
107858696	-1.1629	-1.08872	-0.972257	0.42724	1.37502	0.711099	-1.02099	-0.790397	-1.08671	0.297031	-0.0711018	-0.337148	-0.0894754	-0.480651	-0.6734	-0.0321962	0.459154	1.06185	-0.855445	-0.460033	-0.753805	1.59959	1.93716	2.00708
107879811	-0.684347	-0.68324	-0.671497	0.0844921	0.107762	-0.112474	-0.738056	-0.257947	-0.675555	-0.967248	-0.429029	-0.529163	-0.47114	-0.548674	-0.520023	-0.207323	-0.0223149	1.9805	-0.13109	0.427057	-0.556403	0.549852	1.91003	3.14583
107838743	-0.775262	-0.780998	-0.934713	-0.737775	-0.462244	-0.886579	-0.27043	-0.383079	-0.578792	-0.427091	-0.266655	-1.00134	-0.303537	-0.207898	-0.340544	-0.403493	0.633869	0.865499	0.147082	0.0607116	0.189088	1.89875	2.45871	2.50673
107854758	-0.427496	-0.418817	-0.561821	-0.496741	-0.454522	-0.666147	-0.543791	-0.439334	-0.624184	-0.474945	-0.435938	0.0452595	-0.697878	-0.573763	-0.374298	0.562996	0.494228	-0.336403	-0.46012	-0.219283	-0.213466	1.97759	2.53837	2.8005
107862196	-0.671724	-0.715356	-0.556365	-1.05355	-1.01443	-1.02308	0.742498	0.38242	1.53771	-0.843955	-0.441592	-0.309191	-0.632534	-0.526784	1.064	-0.0381447	0.618798	-0.641215	-0.416153	-0.555897	-0.622984	1.91784	2.12832	1.67136
107839137	-0.414929	-0.397074	-0.860894	-0.00856549	0.222811	0.00935166	-0.323777	-0.481079	-0.71314	-0.375366	-0.78693	0.247493	-0.336896	-0.552242	-0.423593	0.395735	0.325493	-0.310194	-0.82555	-0.448405	-0.732668	1.74241	1.50918	3.53882
107869560	-0.492686	-0.564424	-0.541857	-0.128171	-0.0970816	-0.265043	-0.553898	-0.561367	-0.570536	-0.0914831	-0.192356	-0.226707	-0.569466	-0.531783	-0.559041	-0.00130424	0.370074	-0.343291	-0.52247	-0.51323	-0.536867	2.5157	2.86962	2.10766
107851358	1.63102	0.158936	0.295682	1.43419	1.1298	0.589018	1.08649	-0.172406	1.34169	-0.655077	-1.278	-0.237295	0.391293	0.610138	-0.678454	-1.48991	-0.183841	-0.998164	-0.430973	-0.443962	1.39899	-0.472701	-1.37373	-1.65273
107870060	-0.267059	-0.633926	-0.513587	-0.0577149	0.114236	0.277612	-0.223664	-0.362508	-0.579624	1.4818	-1.45916	0.682291	-0.79501	-1.16605	-0.0135129	0.611223	-0.239627	-0.573684	-0.926854	-1.15524	-0.0520813	2.03923	1.41359	2.39932
107842183	-0.981237	-1.05495	-1.03064	0.438388	0.646476	0.36145	-0.838646	-0.601221	-0.761534	-0.110785	-0.25019	-0.347673	-0.081804	-0.30235	-0.74024	0.0385257	0.106511	0.0258001	-0.553821	-0.253685	-0.592951	2.03962	2.39328	2.45168
107839805	-0.836307	-0.912393	-0.972232	0.256908	0.156316	-0.0692989	-0.82315	-0.688991	-0.674973	0.713732	-0.751326	-0.297682	-0.278168	-0.382693	-0.316007	-0.481649	1.7111	0.0175448	-0.488369	-0.328747	-0.699897	1.35458	2.29119	2.50051
107870487	-0.810644	-0.798709	-0.63403	0.5911	1.06255	0.74846	-0.622033	-0.655647	-0.514491	-0.178109	-0.128819	-0.280324	-0.8023	-0.758405	-0.774878	-0.0947251	0.0712605	-0.257711	-0.47504	-0.50354	-0.700511	2.64641	1.3461	2.52403
107848032	0.985055	0.121881	0.698196	0.684781	-0.17306	0.861527	2.03112	0.495008	1.12239	0.796194	-1.351	0.788936	-0.0974428	0.548484	0.862175	-1.19941	-1.1758	-1.62903	-0.292883	-0.618217	0.214407	-1.29356	-1.30633	-1.07341
107869162	0.391587	0.408795	0.00148318	-0.993152	-1.10362	-1.03303	-0.394433	0.286427	-0.0897112	-0.805531	-0.757097	-0.418848	-0.185122	-0.138988	-0.331274	-0.656857	0.0763822	-0.208942	0.0899711	-0.487871	-0.488482	2.09372	3.07822	1.66638
107859512	-0.695157	-0.718821	-0.807046	0.109676	0.525712	-0.436947	-0.489406	-0.651259	-0.366448	-0.212873	-0.435657	-0.249285	-0.784122	-0.891694	-0.409214	0.523269	1.57323	1.44808	-0.894593	-0.80489	-0.902005	1.27583	1.7976	2.49602
107848438	-0.19305	-0.289566	-0.254008	-0.482185	-0.476312	-0.488516	-0.261082	-0.267945	-0.422783	-0.572068	-0.379956	-0.179591	-0.55558	-0.532291	-0.366669	-0.173733	0.303085	-0.395256	-0.507895	-0.582669	-0.409408	1.86231	2.47016	3.155
107856986	0.0403336	-1.4056	0.185504	-1.17228	-0.225178	-1.50701	2.49496	-0.551765	-0.105911	-0.35003	0.445523	-0.345887	-0.612837	0.35297	0.621138	0.226092	0.992888	-0.0360864	-0.24718	-0.82101	-1.08118	2.49485	0.495964	0.111726
107843381	-0.614411	-0.414668	-0.0409724	0.39229	0.624931	0.679121	1.37733	1.53547	0.561194	-0.329551	2.60995	-1.64979	0.418542	0.769312	0.616025	-1.01101	-0.623156	-0.549832	0.0775898	-0.676221	-0.414086	-1.04339	-1.05817	-1.23649
107849418	0.348342	0.638107	-0.0951863	-0.109789	0.182449	0.52857	-0.728451	-0.1545	-0.189255	-0.164642	0.103778	-1.18738	-0.201678	-0.815181	-0.790717	-0.166314	-1.18336	-0.0931292	-0.77817	-1.2533	-0.390719	2.46956	2.64016	1.39082
107840243	-0.47237	-0.616582	0.00392309	-0.354597	-0.644917	-0.194368	0.439769	-0.668741	-0.401706	-0.291824	-0.661775	0.0818668	0.282078	0.217588	-0.357856	-0.64243	-0.178839	-0.346143	0.202883	-0.372715	-0.925116	0.718708	1.06173	4.12144
107870173	-0.730335	-0.904907	-0.843064	0.936761	1.3339	1.57383	-0.836384	-1.03743	-1.00815	0.0668072	0.260909	-0.0750262	-0.829659	-0.750028	-0.714033	-0.381097	0.85403	-0.957296	-0.439283	0.0116915	-0.580767	1.52067	1.36951	2.15935
107877129	0.520976	1.75945	-0.864007	0.112069	-0.116854	2.19431	0.291701	1.4187	0.301305	0.963918	-1.37139	-0.485064	-0.945907	0.919401	0.138741	0.502325	-0.421297	-0.515492	-0.564164	-1.24923	0.348331	-0.255607	-0.75204	-1.93017
107875217	-1.1435	-1.38784	-1.20811	0.0294953	-0.151199	-0.0639311	-0.699561	-1.357	-0.834306	0.238102	0.315219	0.334303	-1.00268	-0.594142	-0.175685	0.667419	1.34025	-0.256943	0.512229	-0.384251	0.219109	1.49146	1.77985	2.33172
107839850	-0.496384	-0.868909	-0.686705	0.348682	-0.0372413	0.932141	-0.599237	-0.840376	-0.797044	1.16766	-0.635495	0.956604	-0.990047	-0.819238	-0.671249	0.556504	0.37691	0.106499	-0.908996	-0.842569	-0.92531	1.51911	1.71932	2.43537
107849619	-0.509331	-0.587578	-0.535229	-0.532821	-0.508169	-0.532685	-0.599173	-0.562851	-0.444841	-0.431272	-0.319835	-0.428203	-0.466179	-0.543443	1.76024	-0.400295	0.743237	-0.514531	-0.252016	-0.245968	-0.458655	1.22983	2.18669	2.95308
107877498	1.01942	1.11425	0.494419	0.165953	0.191154	0.196063	-0.198584	-0.176017	-0.397023	-0.295188	-0.462482	-0.509057	-0.999584	-1.00299	-0.471238	-0.761822	-0.219674	-0.84833	-0.986756	-1.10212	-0.648055	1.02642	1.94461	2.92662
107858698	0.0871979	-0.0385656	0.00959373	0.775299	0.420398	0.315947	-0.685307	-0.663822	-0.423013	-0.142905	-0.877278	-1.17764	0.628605	0.09157	0.783083	-1.1054	-0.00271191	-0.498699	-1.34	0.256047	-1.37028	0.027951	2.94865	1.98129
107847852	-0.00893686	-1.26955	-0.0406665	-0.574784	-0.27049	-0.182627	0.8923	-1.15073	-0.647189	1.16561	-1.58002	1.38988	-1.4623	-1.06124	0.93649	1.27152	0.0785555	-0.996759	0.146717	-0.177134	-0.133512	0.785329	0.736524	2.15302
novel.7201	-0.795437	-0.746512	-0.831255	-0.671966	-0.46427	-0.64733	-0.668321	-0.532395	-0.606684	-0.0545431	-0.154333	-0.35161	-0.542403	-0.536107	-0.464688	0.482373	2.30465	0.346773	-0.659469	-0.236819	-0.0918582	2.02824	2.19973	1.69423
107852647	-0.840302	-0.898346	0.100093	-0.482428	0.444943	0.153768	-0.366023	0.800701	0.567106	-0.667745	-0.387491	0.464376	-0.602632	-0.567535	-0.433394	0.223583	-1.26672	1.63182	-0.846412	-0.153501	-0.816953	-0.450439	3.35041	1.04313
107839194	-0.899269	-0.295669	-0.709418	0.378974	0.880076	0.56362	-0.645355	-0.0896941	-0.862393	-0.114471	-0.780128	-0.36255	-0.760076	-0.850481	-0.439013	-0.0251651	-1.06263	1.49534	-0.126018	-0.195616	-1.11199	1.96168	2.37345	1.6768
107854664	-0.373965	-0.577663	-0.724103	0.917498	-0.68961	-0.939969	-0.873859	-0.540914	-0.152846	-0.677918	-0.610579	0.85462	-0.150419	-0.250448	-0.256986	-0.377361	-1.22288	1.23693	-0.178321	-0.0161169	0.776659	0.707216	0.609164	3.51186
107872301	-0.337639	-0.421867	1.02496	-1.18241	-0.80346	-1.03945	1.29637	0.989083	0.144403	-1.08831	0.80263	0.489937	0.972236	1.45021	0.535522	-1.07739	-0.32633	0.399996	0.824324	0.602211	1.13825	-1.40223	-1.8458	-1.14526
107863656	-0.137813	-0.99221	-0.321899	-0.295691	-0.696814	-0.590198	-0.249432	-0.796247	-0.862106	0.0296826	-0.756643	1.48928	-0.884148	-0.787203	0.359899	0.732174	1.29699	-0.528282	-0.353849	-0.513347	-0.811679	1.92156	1.18518	2.5628
107845140	-0.600411	-0.826049	-0.602209	0.456386	-0.0673894	1.23103	-0.391104	-0.863566	-0.576408	0.802047	-0.457025	0.268146	-0.677824	-0.866171	-0.567628	-0.214241	-0.452749	-0.3349	-0.801743	-0.0785056	-0.877731	2.36936	1.70378	2.42491
107848562	-0.423647	-0.317771	-0.541363	-0.561201	-0.507187	-0.622193	-0.314757	-0.0764702	-0.0728692	-0.60099	-0.454894	-0.593926	-0.30878	-0.357198	-0.0295303	-0.505005	0.122051	-0.282358	-0.400283	0.0178922	-0.618278	1.75539	2.72179	2.97157
107863900	-1.04467	0.558974	0.186926	-0.279748	-0.453447	-0.893804	-0.770355	0.804304	-0.189695	-0.802949	1.31928	-1.00937	-0.302042	-0.558921	0.356672	-1.35876	1.3992	-0.746306	-0.765427	-0.712394	0.754831	0.385	1.51518	2.60752
novel.710	0.178114	0.283232	0.0881551	-0.231154	-0.710974	0.122456	-0.753974	-0.390119	-0.540362	-1.09768	-0.521311	-0.980863	-0.48609	-0.741287	0.522634	-0.799965	0.396564	-0.853421	0.22631	-0.0297542	-0.557511	2.15429	2.12193	2.60077
107867189	-0.119995	0.230904	-0.379138	-0.53759	-0.764652	-0.71705	-0.489561	0.366718	-0.0653043	-0.912731	-0.904564	-0.765947	-0.447793	-0.163597	0.0789261	-0.632852	0.170975	-0.90644	0.0822992	-0.302154	0.00477217	2.2794	2.55561	2.33977
107852882	-0.793041	-0.598863	-0.777744	0.800527	0.373011	-0.0348541	-0.775595	-0.308684	-0.690626	0.973466	-0.36651	0.342057	-0.783879	-0.864748	-0.49253	1.20072	0.120749	-0.918489	-0.570519	-1.02328	-0.405173	1.45828	3.10067	1.03505
107857572	-0.693927	-0.577366	-0.646765	-0.217473	-0.154951	-0.665168	-0.955594	0.477548	-0.674266	0.00664567	-1.38281	-0.871786	0.348811	0.340842	-0.316678	0.0375306	-0.356328	0.563221	-0.458494	0.66687	-0.954257	2.2762	2.6519	1.5563
107847929	-0.802458	-0.885377	-0.845044	-0.690535	-0.401296	-0.593986	-0.724218	-0.429539	-0.295342	-0.698381	0.198025	0.0519283	-0.566023	-0.633794	-0.662579	0.238494	1.01239	-0.0612901	0.677029	-0.459275	-0.251176	2.40222	2.10384	2.31639
107850600	1.04348	1.85348	0.89375	-0.302996	-0.711612	-0.94715	1.19994	0.314635	0.593927	0.843455	0.173957	1.3142	0.84385	-0.319807	0.23307	-0.371354	-1.0468	-0.632617	0.620393	-0.0139117	-0.518552	-1.44779	-1.93527	-1.68028
107866503	-0.605093	-0.647772	-0.60547	-0.668923	-0.643804	-0.642115	-0.628041	-0.642042	-0.649816	-0.55394	0.486949	-0.387778	-0.644004	-0.681129	0.0925089	0.346435	1.90207	1.62127	-0.687761	-0.624348	-0.638104	1.82636	1.69625	1.9783
107864190	-0.48107	-0.466059	-0.473636	-0.338456	-0.396245	-0.302183	-0.46929	-0.453313	-0.478659	-0.321818	-0.454866	0.125057	-0.527806	-0.47016	-0.453745	0.090784	-0.144605	-0.553676	-0.369196	-0.330613	-0.299425	3.07455	2.08306	2.41138
107846944	-0.507066	-0.590762	-0.56875	-0.522529	-0.322772	-0.523198	-0.553068	-0.229676	-0.21701	-0.590124	0.143181	-0.439338	-0.438249	-0.473289	-0.489307	-0.14394	0.457412	-0.135872	-0.324998	-0.438114	-0.577543	2.09384	2.70963	2.68155
107867293	0.631933	-0.428685	0.619115	-0.919057	-1.14693	-0.678998	0.0861814	-0.437035	0.391874	-0.0142687	0.412045	0.844882	-0.779836	-0.773576	-0.139996	0.313257	0.641954	0.448826	-1.37051	-1.43043	-1.40249	0.706312	2.045	2.38043
107860640	-0.128799	-0.307486	-0.29639	-0.451251	-0.572392	-0.339234	-0.0515512	-0.490168	-0.27276	-0.144439	-0.628816	-0.00426723	-0.546954	-0.567607	0.172013	-0.367375	-0.210536	-0.55736	-0.536019	-0.359388	-0.58537	2.1258	1.58728	3.53307
107846977	-0.761486	-0.876524	-0.87413	0.806339	0.0106357	0.534773	-0.859475	-0.866181	-0.877584	0.948278	-0.429357	-0.243944	-0.762719	-0.648988	-0.784094	0.242435	0.580416	0.867258	-0.405239	-0.581946	-0.8871	1.15644	2.19153	2.52067
107847518	1.38777	1.10755	1.01756	0.734832	0.380779	0.939791	0.487179	0.776995	0.802559	1.03099	-1.48485	-0.699139	0.278684	0.182292	0.903203	-0.990239	-1.05007	-1.70203	-0.555477	-0.0765177	0.572556	-1.36142	-1.32746	-1.35555
107853682	1.27741	1.2202	0.962301	0.299054	-0.136149	2.3106	0.782207	0.552528	1.23212	-0.300299	-0.731187	-1.38343	-0.30823	0.0694777	0.0271722	0.0170115	-1.27936	-1.10099	0.212318	0.00760792	0.268079	-1.0325	-1.50816	-1.45777
107873000	-0.685965	-0.738384	-0.743577	-0.887704	-0.827717	-0.653227	-0.366208	-0.724195	-0.662442	-0.249796	0.293978	0.606849	-0.303891	-0.378563	-0.566645	0.312738	2.5207	-0.200121	-0.241522	-0.227578	-0.708815	1.71269	2.31008	1.40931
107859157	-0.942838	-1.13881	-0.788492	-0.79992	-0.985911	-0.757111	-0.799018	-1.03239	-0.578218	-0.490948	1.83642	0.199662	-0.915241	-0.570298	0.185031	0.578718	1.31441	0.371843	1.64317	-0.357453	0.013054	0.968587	2.02933	1.01643
novel.721	-1.1036	-0.409982	-0.816905	-0.554729	-0.616297	-0.278405	-1.08269	-0.858695	-0.47326	-0.261714	0.640588	0.0562167	-1.19038	-0.479955	-0.566341	1.08041	2.01376	-0.0664228	0.219755	-0.858262	0.3268	2.00683	1.41899	1.85429
107850906	-1.14037	-1.13342	-1.22331	0.00823206	0.0697589	0.428971	-0.851795	-0.899414	-1.15001	0.278242	-0.547099	-0.331199	-0.101807	-0.54413	-0.728988	0.112521	1.44188	0.447231	-0.504878	0.548375	-0.0673019	1.88952	1.74444	2.25455
107860248	0.985453	-0.768888	0.352559	-0.703558	-0.571938	-0.782419	-0.657298	-1.17776	-0.534815	1.25257	-0.701489	-0.133134	-1.56039	-1.0652	0.218524	-0.201205	0.400839	-0.610465	0.550638	-0.226497	0.172987	1.81504	1.83512	2.11132
107846750	-0.199263	-1.3664	-0.368977	0.853894	0.864924	2.16064	-0.620302	-0.351349	0.00456011	0.267687	-1.00537	-0.673342	0.0820963	-0.883153	-0.726069	-1.01768	-0.74332	1.15764	-0.0698228	0.0466591	-1.50303	1.76624	0.69305	1.6307
107865874	-0.580325	-1.21949	-1.86727	-0.537847	-0.763365	-0.788355	1.08268	-0.636248	-0.0884073	-0.848696	-0.42954	1.40304	0.76598	-0.0368951	-0.639028	0.748588	-0.08858	0.643785	-0.163668	-0.435452	-0.703685	1.82478	1.48006	1.87793
107847611	-0.458061	-0.00974793	-0.478345	-0.61014	-0.386552	0.289632	-0.917064	-0.404762	-0.605818	-0.023737	-1.5474	-0.0173824	-0.334025	-0.839628	-0.59581	0.160277	1.62748	-0.156795	-0.0538298	-0.317809	-0.478019	2.49526	1.10548	2.5568
107846932	0.770474	0.722845	0.682871	-0.323837	-0.195246	-0.271912	0.354134	0.731618	0.10022	-0.658577	-0.387124	-0.606456	-0.556138	-0.812544	0.148574	-1.43652	-1.29515	-1.42522	-0.875238	-0.860325	0.648516	1.8123	1.30209	2.43065
107867060	-0.738742	-0.815741	-0.592786	-0.591427	-0.13051	-0.559415	-0.691907	-0.665382	-0.577363	-0.295867	0.964079	0.0347176	-0.642752	-0.813382	-0.420902	0.58388	0.924526	0.452565	-0.467341	-0.629604	-0.787128	2.25572	1.52374	2.68101
107853400	0.121175	-0.0522309	-0.0281582	-0.410955	1.39319	-0.883041	-0.587299	0.290139	0.856949	-1.30453	-0.0130093	0.197542	-1.20952	-1.65311	-0.825056	0.854799	-0.541366	1.31543	-1.07849	-1.02616	-0.0599545	1.28589	1.83166	1.52609
107849731	0.56926	0.162576	0.259254	-0.867445	-0.0489981	-0.459897	-0.404498	-1.24428	-0.580497	-0.669398	1.56726	-0.327921	-0.52114	-0.995578	-0.332083	-0.224505	-0.281706	-0.655488	1.72661	-0.570444	-1.11522	0.623271	2.04703	2.34384
107862370	0.434049	0.149652	1.3802	-0.692543	-0.927141	-1.44674	1.6382	1.22238	0.5761	-1.16006	0.68972	1.11174	0.644722	0.876011	1.10168	-0.938549	-0.484892	0.0686743	0.273516	-0.298321	0.0767225	-1.46227	-1.56941	-1.26345
107875173	-0.766477	-0.708598	-0.754949	-0.0426691	-0.249608	0.089373	-0.725283	-0.555711	-0.620422	-0.21371	0.0342869	-0.184881	-0.474527	-0.44989	-0.560515	-0.0940961	-0.105098	0.861763	-0.36893	-0.494669	-0.705884	2.48724	1.66805	2.93521
107859769	0.214809	-0.24871	-0.0400203	-0.72296	-0.762037	-0.69596	0.256702	-0.478177	0.156735	-0.444501	-0.594622	-0.302883	-0.602984	-0.550887	0.409056	-0.474356	-0.349125	-0.778338	-0.322645	-0.306948	-0.462495	1.50345	2.46803	3.12887
107878501	-1.15905	-1.22763	-1.28356	-0.366527	-0.284798	-0.102731	-0.963413	-0.921659	-0.614387	0.282228	0.647484	-0.286733	-0.67058	-0.755553	0.372096	0.657824	2.02436	-0.552526	0.176855	0.173308	-0.379689	1.41478	1.76533	2.05457
107869350	-0.581014	0.0495847	-0.313248	0.582887	0.702213	-0.525317	0.449705	0.506212	-0.157025	1.52315	-1.22568	-0.576572	-0.524979	-0.580083	-0.0278502	-1.07958	-0.656662	-0.343964	-0.399866	-0.438344	-0.832321	-0.47621	3.20006	1.72491
107843399	0.977984	-1.05149	-0.00159796	0.38744	-0.487616	-0.0826363	0.261553	-1.11306	-0.262621	0.387487	-2.08149	1.85069	-1.134	-0.600863	0.473103	0.537079	1.52137	-1.5811	-0.20933	-0.482842	-0.268818	0.267809	1.00111	1.69183
107854034	-0.617736	-0.657071	-0.841929	-0.810809	-0.796381	-0.647545	-0.561833	-0.480094	-0.465104	-0.664542	1.38969	-0.331962	-0.759695	-0.669232	0.250832	0.674147	2.25931	-0.435642	0.88069	-0.539339	-0.597547	2.47183	1.32854	0.621425
107856382	0.67125	0.653943	0.611639	1.3468	0.0106318	1.27782	1.24553	1.00717	0.179441	0.124154	0.824251	-0.357909	0.657769	-0.360071	0.291188	-1.60897	-0.961264	-0.896681	-0.141578	-0.534648	0.994242	-1.94804	-1.36576	-1.7209
107854484	0.391983	0.750086	1.36179	-0.377606	-1.06494	0.387612	1.03112	0.0849602	1.1394	1.17293	-1.95235	1.13864	0.233578	0.226665	0.522856	-0.769994	0.00110289	-1.45039	-0.73865	-0.872542	1.70567	-0.943607	-1.06103	-0.917293
107865882	-0.0638117	-0.109131	0.104849	0.0719513	-0.707555	0.556508	1.28964	-1.17786	-0.156468	-0.500585	-0.6632	-0.126683	-1.44078	-0.895237	1.87253	-0.858167	0.46854	-0.360644	-0.627234	-0.387903	-1.07598	0.619028	2.34354	1.82465
novel.5381	-0.396005	0.123173	0.308488	0.0722551	0.10438	0.0531398	0.40477	-0.754908	0.239652	-0.623969	-0.498858	-0.774936	-0.438537	-0.852783	-0.698555	-0.443926	1.31332	-0.101902	-0.991965	-1.19586	-0.269898	-0.0114285	2.93055	2.50381
107867753	-0.298287	-0.450548	-0.488048	-0.661416	0.0105823	-0.252898	-0.536504	-0.7325	-0.28056	-0.500747	-0.0854732	-0.186591	-0.679377	-0.768233	-0.153226	0.91165	-0.701603	-0.792404	0.0421031	-0.404537	0.197396	3.44321	1.60026	1.76775
107851261	1.2577	0.514178	1.77297	-0.0093645	-0.356708	0.23352	1.22819	0.577893	0.252992	-0.153134	-1.86368	1.01379	0.191307	-0.594763	1.33624	-1.4078	-0.818785	-1.00796	-1.10798	-0.0926216	1.26412	-0.820768	-1.43007	0.0207389
107872540	1.50436	1.07443	0.918974	0.458384	0.446769	1.04455	0.21905	2.09598	0.271858	-0.680532	-1.48347	0.388286	0.542485	0.450749	-0.561135	0.490494	-0.367276	-1.5311	-0.831453	-0.56858	0.0893905	-1.24712	-1.15693	-1.56816
107862138	-1.38743	-1.16652	-1.36193	-0.976017	-0.846302	-0.825775	-0.905759	-0.610068	-0.583694	-1.27042	0.807475	0.141002	0.720857	0.609006	0.411605	-0.0989765	0.423894	1.97536	0.423801	0.330763	0.318632	0.4208	1.62417	1.82553
107849790	-0.288451	-0.630962	-0.647512	0.505841	0.828074	1.17152	-0.8086	-0.372232	-0.446534	0.737128	-0.643148	-0.368418	-0.741308	-0.731388	-0.593992	-0.468596	-0.296301	0.706997	-0.923931	-0.935035	-1.06626	1.43101	2.13949	2.4426
107858085	-0.696558	1.02398	0.305581	-0.235025	-0.0743265	0.319678	0.120447	-1.05805	-0.366059	-0.242106	0.393517	-0.223848	0.44168	0.266749	0.709887	-1.64325	-0.433193	0.0486707	-1.76374	-0.799381	-1.5386	1.7252	1.78859	1.93015
107865674	-0.516284	0.187366	-0.0553598	-0.11666	0.125679	-0.726099	-0.819134	0.308889	-0.568756	-0.750247	-0.0930715	-1.06096	-1.33697	-1.11064	-0.198348	0.668874	0.69372	-0.109976	-0.747866	-0.731296	0.577334	1.78553	2.59819	1.9961
107853603	0.406669	1.05009	2.06631	-1.47935	-1.51938	-0.648698	0.204672	-0.0126083	1.06239	-0.011014	0.747628	0.745056	0.0518223	0.87433	-0.448508	0.739805	-0.931207	0.385877	0.516806	0.471355	0.185747	-1.08542	-2.09827	-1.27409
[truncated: 268 more rows]

## Sheet: purple
Gene ID	cc_0_1	cc_0_2	cc_0_3	cp_0h_1	cp_0h_2	cp_0h_3	cc_L2_1	cc_L2_2	cc_L2_3	cp_L2_1	cp_L2_2	cp_L2_3	cc_L6_1	cc_L6_2	cc_L6_3	cp_L6_1	cp_L6_2	cp_L6_3	cc_L12_1	cc_L12_2	cc_L12_3	cp_L12_1	cp_L12_2	cp_L12_3
[truncated: 623 more rows]

## Sheet: black
Gene ID	cc_0_1	cc_0_2	cc_0_3	cp_0h_1	cp_0h_2	cp_0h_3	cc_L2_1	cc_L2_2	cc_L2_3	cp_L2_1	cp_L2_2	cp_L2_3	cc_L6_1	cc_L6_2	cc_L6_3	cp_L6_1	cp_L6_2	cp_L6_3	cc_L12_1	cc_L12_2	cc_L12_3	cp_L12_1	cp_L12_2	cp_L12_3
[truncated: 1,183 more rows]
