# Supplementary material for: Integrated Transcriptomic and Metabolomic Analyses of Cold-Tolerant and Cold-Sensitive Pepper Species Reveal Key Genes and Essential Metabolic Pathways Involved in Response to Cold Stress
Source: Int J Mol Sci. 2022 Jun 15;23(12):6683. doi: 10.3390/ijms23126683 (PMC9224482; doi:10.3390/ijms23126683)
Supplement: Supplementary file 1 [file ijms-23-06683-s001.zip › S3_DEGs KEGGenrich.xlsx]

## Sheet: cp2vscc0_KEGGenrich
KEGGID	Description	GeneRatio	BgRatio	pvalue	padj	geneID	geneName	keggID	Count	Up	Up_Gene_names	Down	Down_Gene_names
sly04626	Plant-pathogen interaction	27/291	147/4046	3.71024e-06	0.000345052	107860115/107872867/107860522/107842605/107843851/107874660/107860484/107850672/107860951/107839265/107845825/107850465/107855368/107843743/107840155/107862088/107874674/107874972/novel.374/107877796/107861198/107865937/107843864/107861622/107872239/107844095/107872603	LOC107860115/LOC107872867/LOC107860522/LOC107842605/LOC107843851/LOC107874660/LOC107860484/LOC107850672/LOC107860951/LOC107839265/LOC107845825/LOC107850465/LOC107855368/LOC107843743/LOC107840155/LOC107862088/LOC107874674/LOC107874972/-/LOC107877796/LOC107861198/LOC107865937/LOC107843864/LOC107861622/LOC107872239/LOC107844095/LOC107872603	sly:101256237/sly:101255501/sly:101251639/sly:101268787/sly:101266882/sly:101265138/sly:101266887/sly:101256827/sly:101252553/sly:101261749/sly:101256817/sly:101245185/sly:101253387/sly:544131/sly:100191111/sly:543603/sly:101253386/sly:101257476/sly:101256900/sly:101250219/sly:544042/sly:101268854/sly:101249692/sly:543946/sly:101055516/sly:101246110/sly:544041	27	25	107860115/107872867/107860522/107842605/107843851/107874660/107860484/107850672/107860951/107839265/107845825/107855368/107843743/107840155/107862088/107874674/107874972/novel.374/107877796/107861198/107865937/107843864/107861622/107872239/107872603	2	107850465/107844095
sly04075	Plant hormone signal transduction	30/291	207/4046	0.000130692	0.00437366	107862455/107843441/107840891/107850747/novel.6090/107846008/107861681/107843874/107853624/107843865/novel.5058/107861852/107868079/107840155/107840779/107875710/107840207/107859144/107861786/107877900/107851691/107867043/107861622/107870540/novel.7147/107878032/107861707/107874961/107877747/107860330	LOC107862455/LOC107843441/LOC107840891/LOC107850747/-/LOC107846008/LOC107861681/LOC107843874/LOC107853624/LOC107843865/-/LOC107861852/LOC107868079/LOC107840155/LOC107840779/LOC107875710/LOC107840207/LOC107859144/LOC107861786/LOC107877900/LOC107851691/LOC107867043/LOC107861622/LOC107870540/-/LOC107878032/LOC107861707/LOC107874961/LOC107877747/LOC107860330	sly:101260711/sly:101250944/sly:100134911/sly:101261048/sly:101263158/sly:100736479/sly:100301927/sly:101248058/sly:101268417/sly:101245709/sly:101248065/sly:101055548/sly:101267832/sly:100191111/sly:778234/sly:543518/sly:101246970/sly:101265701/sly:101055552/sly:101247936/sly:101260027/sly:101250688/sly:543946/sly:101262506/sly:101248844/sly:544270/sly:100316894/sly:101055592/sly:101055555/sly:1…	30	22	107862455/107843441/107840891/107850747/novel.6090/107846008/107861681/107853624/novel.5058/107861852/107868079/107840155/107840207/107859144/107861786/107877900/107851691/107867043/107861622/107870540/novel.7147/107874961	8	107843874/107843865/107840779/107875710/107878032/107861707/107877747/107860330
sly04016	MAPK signaling pathway - plant	22/291	132/4046	0.000141086	0.00437366	107873437/107872867/107860522/107843441/107842605/107850747/107839265/107853624/107877224/107843743/107840155/107862088/107840779/107875710/107878318/107849571/107850312/107861622/107844095/107864513/107861707/107860330	LOC107873437/LOC107872867/LOC107860522/LOC107843441/LOC107842605/LOC107850747/LOC107839265/LOC107853624/LOC107877224/LOC107843743/LOC107840155/LOC107862088/LOC107840779/LOC107875710/LOC107878318/LOC107849571/LOC107850312/LOC107861622/LOC107844095/LOC107864513/LOC107861707/LOC107860330	sly:543880/sly:101255501/sly:101251639/sly:101250944/sly:101268787/sly:101261048/sly:101261749/sly:101268417/sly:101254612/sly:544131/sly:100191111/sly:543603/sly:778234/sly:543518/sly:101267358/sly:101244245/sly:543990/sly:543946/sly:101246110/sly:101246650/sly:100316894/sly:101251432	22	16	107873437/107872867/107860522/107843441/107842605/107850747/107839265/107853624/107877224/107843743/107840155/107862088/107878318/107849571/107861622/107864513	6	107840779/107875710/107850312/107844095/107861707/107860330
sly00520	Amino sugar and nucleotide sugar metabolism	17/291	106/4046	0.00126816	0.0294847	107875632/107854073/107877663/107873035/107862290/107866396/107840969/107878318/107866897/107840845/107859000/107854241/107861169/107878072/107843748/107864032/107863414	LOC107875632/LOC107854073/LOC107877663/LOC107873035/LOC107862290/LOC107866396/LOC107840969/LOC107878318/LOC107866897/LOC107840845/LOC107859000/LOC107854241/LOC107861169/LOC107878072/LOC107843748/LOC107864032/LOC107863414	sly:101244155/sly:101258487/sly:101257483/sly:101249858/sly:101261402/sly:101266358/sly:778210/sly:101267358/sly:778211/sly:101251855/sly:101267862/sly:101257677/sly:101250823/sly:101253205/sly:543517/sly:101246662/sly:101250671	17	13	107875632/107854073/107877663/107873035/107862290/107878318/107866897/107840845/107859000/107854241/107861169/107843748/107864032	4	107866396/107840969/107878072/107863414
sly00945	Stilbenoid, diarylheptanoid and gingerol biosynthesis	6/291	19/4046	0.00160038	0.029767	107844729/107875407/107844023/107860278/107840863/107845679	LOC107844729/LOC107875407/LOC107844023/LOC107860278/LOC107840863/LOC107845679	sly:101261765/sly:101244196/sly:101262367/sly:101265690/sly:544249/sly:101268615	6	5	107844729/107875407/107844023/107860278/107840863	1	107845679
sly00941	Flavonoid biosynthesis	7/291	29/4046	0.00364241	0.0529646	107844729/107875407/107844023/107860278/107871144/107840863/107871256	LOC107844729/LOC107875407/LOC107844023/LOC107860278/LOC107871144/LOC107840863/LOC107871256	sly:101261765/sly:101244196/sly:101262367/sly:101265690/sly:101266223/sly:544249/sly:778295	7	7	107844729/107875407/107844023/107860278/107871144/107840863/107871256	0
sly00250	Alanine, aspartate and glutamate metabolism	8/291	37/4046	0.00398658	0.0529646	107854073/107870135/107875948/107862809/107850578/107873413/107838791/107875422	LOC107854073/LOC107870135/LOC107875948/LOC107862809/LOC107850578/LOC107873413/LOC107838791/LOC107875422	sly:101258487/sly:543756/sly:101250515/sly:544313/sly:100147722/sly:543875/sly:101259235/sly:101259343	8	6	107854073/107870135/107875948/107862809/107873413/107838791	2	107850578/107875422
sly00500	Starch and sucrose metabolism	16/291	112/4046	0.00578281	0.0672252	107869182/107863145/107852961/107864313/107869091/107878565/107840969/107866897/107864054/107861169/107866217/107876454/107863104/107847384/107852065/107873685	LOC107869182/LOC107863145/LOC107852961/LOC107864313/LOC107869091/LOC107878565/LOC107840969/LOC107866897/LOC107864054/LOC107861169/LOC107866217/LOC107876454/LOC107863104/LOC107847384/LOC107852065/LOC107873685	sly:101255272/sly:101250960/sly:101247621/sly:101055573/sly:101253815/sly:100134910/sly:778210/sly:778211/sly:101253025/sly:101250823/sly:101247993/sly:101261524/sly:101259221/sly:101257661/sly:101268420/sly:101255913	16	11	107863145/107852961/107864313/107869091/107878565/107866897/107861169/107866217/107863104/107852065/107873685	5	107869182/107840969/107864054/107876454/107847384
sly00260	Glycine, serine and threonine metabolism	10/291	60/4046	0.00953086	0.0984855	107845682/107851618/107872895/107839528/107867328/107854965/107867550/107847449/107838766/107855640	LOC107845682/LOC107851618/LOC107872895/LOC107839528/LOC107867328/LOC107854965/LOC107867550/LOC107847449/LOC107838766/LOC107855640	sly:101256422/sly:101252608/sly:101244882/sly:101255433/sly:101264818/sly:101257194/sly:101247124/sly:101266123/sly:101258399/sly:101249833	10	6	107845682/107872895/107839528/107867328/107854965/107867550	4	107851618/107847449/107838766/107855640
sly00630	Glyoxylate and dicarboxylate metabolism	10/291	64/4046	0.0148485	0.138091	107862684/107870135/107845595/107844759/107850312/107858887/107872895/107864181/107867328/107854965	LOC107862684/LOC107870135/LOC107845595/LOC107844759/LOC107850312/LOC107858887/LOC107872895/LOC107864181/LOC107867328/LOC107854965	sly:101267395/sly:543756/sly:100134875/sly:778330/sly:543990/sly:101251259/sly:101244882/sly:101253131/sly:101264818/sly:101257194	10	9	107862684/107870135/107845595/107844759/107858887/107872895/107864181/107867328/107854965	1	107850312
sly00195	Photosynthesis	8/291	54/4046	0.0372423	0.305473	107842516/107872990/107845286/107855007/107872840/107878867/107851664/107868483	LOC107842516/LOC107872990/LOC107845286/LOC107855007/LOC107872840/LOC107878867/LOC107851664/LOC107868483	sly:101245880/sly:101260830/sly:101249865/sly:101263132/sly:101263124/sly:101263732/sly:101245166/sly:101254454	8	7	107842516/107872990/107845286/107855007/107872840/107878867/107851664	1	107868483
sly00430	Taurine and hypotaurine metabolism	3/291	4046-11-01	0.0394158	0.305473	107862809/107850578/107838791	LOC107862809/LOC107850578/LOC107838791	sly:544313/sly:100147722/sly:101259235	3	2	107862809/107838791	1	107850578
sly00760	Nicotinate and nicotinamide metabolism	4/291	20/4046	0.0507922	0.331932	107874740/107845103/107873081/107862603	LOC107874740/LOC107845103/LOC107873081/LOC107862603	sly:101263635/sly:101259795/sly:101261528/sly:101246910	4	4	107874740/107845103/107873081/107862603	0
sly00910	Nitrogen metabolism	4/291	20/4046	0.0507922	0.331932	107870135/107843241/107840295/107867964	LOC107870135/LOC107843241/LOC107840295/LOC107867964	sly:543756/sly:101254722/sly:778325/sly:100736473	4	4	107870135/107843241/107840295/107867964	0
sly00360	Phenylalanine metabolism	7/291	48/4046	0.0535374	0.331932	107879725/107845345/107875407/107854291/107862076/107860278/107847449	LOC107879725/LOC107845345/LOC107875407/LOC107854291/LOC107862076/LOC107860278/LOC107847449	sly:778254/sly:101264863/sly:101244196/sly:101243656/sly:101249624/sly:101265690/sly:101266123	7	6	107879725/107845345/107875407/107854291/107862076/107860278	1	107847449
sly00270	Cysteine and methionine metabolism	10/291	80/4046	0.0588713	0.34219	107845345/107850602/107853805/107844759/107851205/107847415/107864181/107865075/107864513/107838766	LOC107845345/LOC107850602/LOC107853805/LOC107844759/LOC107851205/LOC107847415/LOC107864181/LOC107865075/LOC107864513/LOC107838766	sly:101264863/sly:101247506/sly:544052/sly:778330/sly:101263923/sly:100134880/sly:101253131/sly:543536/sly:101246650/sly:101258399	10	8	107845345/107850602/107853805/107844759/107851205/107847415/107864181/107864513	2	107865075/107838766
sly00400	Phenylalanine, tyrosine and tryptophan biosynthesis	6/291	40/4046	0.0637161	0.348564	107842110/107867463/107845345/107845682/107845710/107839528	LOC107842110/LOC107867463/LOC107845345/LOC107845682/LOC107845710/LOC107839528	sly:101259361/sly:544153/sly:101264863/sly:101256422/sly:101258500/sly:101255433	6	6	107842110/107867463/107845345/107845682/107845710/107839528	0
sly00740	Riboflavin metabolism	3/291	14/4046	0.0741726	0.372692	107840068/107870529/107862848	LOC107840068/LOC107870529/LOC107862848	sly:544238/sly:101260420/sly:101249252	3	3	107840068/107870529/107862848	0
sly00940	Phenylpropanoid biosynthesis	12/291	106/4046	0.0761935	0.372692	107869182/107844729/107860606/107875407/107844023/107854291/107840027/107862076/107860278/107868752/107840863/107850276	LOC107869182/LOC107844729/LOC107860606/LOC107875407/LOC107844023/LOC107854291/LOC107840027/LOC107862076/LOC107860278/LOC107868752/LOC107840863/LOC107850276	sly:101255272/sly:101261765/sly:101244246/sly:101244196/sly:101262367/sly:101243656/sly:544293/sly:101249624/sly:101265690/sly:101253377/sly:544249/sly:101259903	12	10	107844729/107860606/107875407/107844023/107854291/107840027/107862076/107860278/107868752/107840863	2	107869182/107850276
sly00040	Pentose and glucuronate interconversions	9/291	74/4046	0.0814545	0.372692	107861639/107862290/107843830/107875046/107871435/107864051/107874776/107839644/107842557	LOC107861639/LOC107862290/LOC107843830/LOC107875046/LOC107871435/LOC107864051/LOC107874776/LOC107839644/LOC107842557	sly:101245743/sly:101261402/sly:544051/sly:101246061/sly:101264933/sly:101266973/sly:101264436/sly:101260871/sly:101261266	9	8	107861639/107862290/107843830/107875046/107871435/107864051/107874776/107839644	1	107842557
sly00906	Carotenoid biosynthesis	5/291	33/4046	0.0841562	0.372692	107852027/107850059/107868281/107850957/107850430	LOC107852027/LOC107850059/LOC107868281/LOC107850957/LOC107850430	sly:544163/sly:101249565/sly:543988/sly:100322875/sly:543696	5	5	107852027/107850059/107868281/107850957/107850430	0
sly00908	Zeatin biosynthesis	4/291	24/4046	0.0891326	0.376788	107866953/107854914/107842013/107853864	LOC107866953/LOC107854914/LOC107842013/LOC107853864	sly:101055612/sly:100874537/sly:100874543/sly:101263304	4	2	107854914/107842013	2	107866953/107853864
sly00730	Thiamine metabolism	3/291	19/4046	0.152192	0.615387	107859361/107860754/107873461	LOC107859361/LOC107860754/LOC107873461	sly:101247277/sly:101246297/sly:101264726	3	1	107860754	2	107859361/107873461
sly00073	Cutin, suberine and wax biosynthesis	3/291	22/4046	0.20749	0.771863	107838799/107862886/107870644	LOC107838799/LOC107862886/LOC107870644	sly:101245281/sly:101257641/sly:101266813	3	3	107838799/107862886/107870644	0
sly00650	Butanoate metabolism	3/291	22/4046	0.20749	0.771863	107862809/107850578/107838791	LOC107862809/LOC107850578/LOC107838791	sly:544313/sly:100147722/sly:101259235	3	2	107862809/107838791	1	107850578
sly00052	Galactose metabolism	5/291	46/4046	0.233235	0.792417	107840969/107866897/107873305/107840322/107860671	LOC107840969/LOC107866897/LOC107873305/LOC107840322/LOC107860671	sly:778210/sly:778211/sly:101257269/sly:101263843/sly:101257623	5	3	107866897/107840322/107860671	2	107840969/107873305
sly00590	Arachidonic acid metabolism	2/291	13/4046	0.239171	0.792417	107854033/107866862	LOC107854033/LOC107866862	sly:101267727/sly:101268179	2	2	107854033/107866862	0
sly00591	Linoleic acid metabolism	2/291	13/4046	0.239171	0.792417	107861665/107865522	LOC107861665/LOC107865522	sly:544009/sly:101257007	2	2	107861665/107865522	0
sly00561	Glycerolipid metabolism	7/291	71/4046	0.247098	0.792417	107878499/107864034/107850590/107856742/107873305/107877723/107840795	LOC107878499/LOC107864034/LOC107850590/LOC107856742/LOC107873305/LOC107877723/LOC107840795	sly:101247838/sly:101246087/sly:101251763/sly:101268277/sly:101257269/sly:101259856/sly:101263085	7	4	107878499/107864034/107877723/107840795	3	107850590/107856742/107873305
sly00410	beta-Alanine metabolism	4/291	37/4046	0.273989	0.832748	107862809/107850578/107838791/107847449	LOC107862809/LOC107850578/LOC107838791/LOC107847449	sly:544313/sly:100147722/sly:101259235/sly:101266123	4	2	107862809/107838791	2	107850578/107847449
sly01230	Biosynthesis of amino acids	17/291	202/4046	0.2824	0.832748	107870135/107842110/107867463/107845345/107850602/107851945/107848158/107868013/107845682/107845710/novel.1104/107873413/107839528/107867328/107867550/107838766/107866980	LOC107870135/LOC107842110/LOC107867463/LOC107845345/LOC107850602/LOC107851945/LOC107848158/LOC107868013/LOC107845682/LOC107845710/-/LOC107873413/LOC107839528/LOC107867328/LOC107867550/LOC107838766/LOC107866980	sly:543756/sly:101259361/sly:544153/sly:101264863/sly:101247506/sly:101251907/sly:101260137/sly:100301981/sly:101256422/sly:101258500/sly:101266787/sly:543875/sly:101255433/sly:101264818/sly:101247124/sly:101258399/sly:101263020	17	16	107870135/107842110/107867463/107845345/107850602/107851945/107848158/107868013/107845682/107845710/novel.1104/107873413/107839528/107867328/107867550/107866980	1	107838766
sly00960	Tropane, piperidine and pyridine alkaloid biosynthesis	3/291	26/4046	0.286537	0.832748	107845345/107874578/107847449	LOC107845345/LOC107874578/LOC107847449	sly:101264863/sly:101246642/sly:101266123	3	2	107845345/107874578	1	107847449
sly04712	Circadian rhythm - plant	4/291	39/4046	0.307112	0.84772	107850670/107871256/107849675/107872706	LOC107850670/LOC107871256/LOC107849675/LOC107872706	sly:101249698/sly:778295/sly:101259391/sly:101246029	4	4	107850670/107871256/107849675/107872706	0
sly00100	Steroid biosynthesis	3/291	28/4046	0.32703	0.84772	107875519/107839483/107840596	LOC107875519/LOC107839483/LOC107840596	sly:100736533/sly:101252433/sly:101247376	3	3	107875519/107839483/107840596	0
sly00220	Arginine biosynthesis	3/291	28/4046	0.32703	0.84772	107870135/107868013/107866980	LOC107870135/LOC107868013/LOC107866980	sly:543756/sly:100301981/sly:101263020	3	3	107870135/107868013/107866980	0
sly00480	Glutathione metabolism	7/291	78/4046	0.32815	0.84772	107875145/107854335/107854033/107858803/107848053/107859857/107865075	LOC107875145/LOC107854335/LOC107854033/LOC107858803/LOC107848053/LOC107859857/LOC107865075	sly:101268500/sly:101248761/sly:101267727/sly:101268216/sly:101249821/sly:101264583/sly:543536	7	6	107875145/107854335/107854033/107858803/107848053/107859857	1	107865075
sly00670	One carbon pool by folate	2/291	18/4046	0.375288	0.918467	107850886/107867328	LOC107850886/LOC107867328	sly:101255258/sly:101264818	2	2	107850886/107867328	0
sly00950	Isoquinoline alkaloid biosynthesis	2/291	18/4046	0.375288	0.918467	107845345/107847449	LOC107845345/LOC107847449	sly:101264863/sly:101266123	2	1	107845345	1	107847449
sly04130	SNARE interactions in vesicular transport	3/291	33/4046	0.427294	0.999599	107863302/107846179/107843713	LOC107863302/LOC107846179/LOC107843713	sly:101249333/sly:101262338/sly:101247381	3	3	107863302/107846179/107843713	0
sly00062	Fatty acid elongation	3/291	34/4046	0.446807	0.999599	107872813/107849942/107839065	LOC107872813/LOC107849942/LOC107839065	sly:101246151/sly:101257933/sly:101244691	3	2	107872813/107839065	1	107849942
sly00904	Diterpenoid biosynthesis	2/291	21/4046	0.452377	0.999599	107840383/107861895	LOC107840383/LOC107861895	sly:100134888/sly:543504	2	2	107840383/107861895	0
sly04120	Ubiquitin mediated proteolysis	8/291	104/4046	0.475846	0.999599	107845380/107850670/107875215/107859035/107848582/107849675/107870243/novel.1059	LOC107845380/LOC107850670/LOC107875215/LOC107859035/LOC107848582/LOC107849675/LOC107870243/-	sly:101260872/sly:101249698/sly:101247534/sly:101260503/sly:101266186/sly:101259391/sly:101262418/sly:101264868	8	5	107845380/107850670/107859035/107848582/107849675	3	107875215/107870243/novel.1059
sly00600	Sphingolipid metabolism	2/291	22/4046	0.476866	0.999599	107873305/107845766	LOC107873305/LOC107845766	sly:101257269/sly:543709	2	1	107845766	1	107873305
sly00350	Tyrosine metabolism	3/291	36/4046	0.484995	0.999599	107845345/107873127/107847449	LOC107845345/LOC107873127/LOC107847449	sly:101264863/sly:101252525/sly:101266123	3	2	107845345/107873127	1	107847449
sly00240	Pyrimidine metabolism	4/291	50/4046	0.489409	0.999599	107845103/107873081/107844226/107875422	LOC107845103/LOC107873081/LOC107844226/LOC107875422	sly:101259795/sly:101261528/sly:101243930/sly:101259343	4	3	107845103/107873081/107844226	1	107875422
sly00130	Ubiquinone and other terpenoid-quinone biosynthesis	3/291	38/4046	0.521881	0.999599	107845345/107875407/107862076	LOC107845345/LOC107875407/LOC107862076	sly:101264863/sly:101244196/sly:101249624	3	3	107845345/107875407/107862076	0
sly00620	Pyruvate metabolism	6/291	82/4046	0.544672	0.999599	107862684/107851945/107844759/107851205/107864181/107847755	LOC107862684/LOC107851945/LOC107844759/LOC107851205/LOC107864181/LOC107847755	sly:101267395/sly:101251907/sly:778330/sly:101263923/sly:101253131/sly:101249193	6	6	107862684/107851945/107844759/107851205/107864181/107847755	0
sly04122	Sulfur relay system	1/291	4046-11-01	0.560492	0.999599	107859361	LOC107859361	sly:101247277	1	0		1	107859361
sly00710	Carbon fixation in photosynthetic organisms	5/291	69/4046	0.560715	0.999599	107866774/107848158/107844759/107864181/107847755	LOC107866774/LOC107848158/LOC107844759/LOC107864181/LOC107847755	sly:101264004/sly:101260137/sly:778330/sly:101253131/sly:101249193	5	5	107866774/107848158/107844759/107864181/107847755	0
sly01210	2-Oxocarboxylic acid metabolism	3/291	43/4046	0.607346	0.999599	107851945/107868013/107838766	LOC107851945/LOC107868013/LOC107838766	sly:101251907/sly:100301981/sly:101258399	3	2	107851945/107868013	1	107838766
sly00460	Cyanoamino acid metabolism	2/291	28/4046	0.608809	0.999599	107869182/107867328	LOC107869182/LOC107867328	sly:101255272/sly:101264818	2	1	107867328	1	107869182
sly04145	Phagosome	5/291	75/4046	0.636185	0.999599	107863302/novel.3171/107873469/107855885/107863951	LOC107863302/-/LOC107873469/LOC107855885/LOC107863951	sly:101249333/sly:101245021/sly:101262621/sly:543862/sly:778317	5	4	107863302/107873469/107855885/107863951	1	novel.3171
sly00330	Arginine and proline metabolism	3/291	46/4046	0.653512	0.999599	107875948/107860213/107847415	LOC107875948/LOC107860213/LOC107847415	sly:101250515/sly:101254254/sly:100134880	3	3	107875948/107860213/107847415	0
sly00230	Purine metabolism	5/291	82/4046	0.71348	0.999599	107860754/107839860/107873081/107867410/107859270	LOC107860754/LOC107839860/LOC107873081/LOC107867410/LOC107859270	sly:101246297/sly:101265372/sly:101261528/sly:101248507/sly:101268249	5	3	107860754/107873081/107867410	2	107839860/107859270
sly00290	Valine, leucine and isoleucine biosynthesis	1/291	17/4046	0.719589	0.999599	107851945	LOC107851945	sly:101251907	1	1	107851945	0
sly00592	alpha-Linolenic acid metabolism	2/291	35/4046	0.728977	0.999599	107861665/107839143	LOC107861665/LOC107839143	sly:544009/sly:101261255	2	2	107861665/107839143	0
sly00770	Pantothenate and CoA biosynthesis	1/291	18/4046	0.739842	0.999599	107847764	LOC107847764	sly:101263146	1	1	107847764	0
sly00053	Ascorbate and aldarate metabolism	2/291	36/4046	0.743329	0.999599	107862290/107859857	LOC107862290/LOC107859857	sly:101261402/sly:101264583	2	2	107862290/107859857	0
sly00051	Fructose and mannose metabolism	3/291	54/4046	0.757157	0.999599	107859926/107840969/107866897	LOC107859926/LOC107840969/LOC107866897	sly:101265391/sly:778210/sly:778211	3	2	107859926/107866897	1	107840969
sly01200	Carbon metabolism	15/291	241/4046	0.762107	0.999599	107862684/107866774/107848158/107845595/107840969/107844759/107866897/107850312/107872895/107864181/107850886/107867328/107854965/107867550/107847755	LOC107862684/LOC107866774/LOC107848158/LOC107845595/LOC107840969/LOC107844759/LOC107866897/LOC107850312/LOC107872895/LOC107864181/LOC107850886/LOC107867328/LOC107854965/LOC107867550/LOC107847755	sly:101267395/sly:101264004/sly:101260137/sly:100134875/sly:778210/sly:778330/sly:778211/sly:543990/sly:101244882/sly:101253131/sly:101255258/sly:101264818/sly:101257194/sly:101247124/sly:101249193	15	13	107862684/107866774/107848158/107845595/107844759/107866897/107872895/107864181/107850886/107867328/107854965/107867550/107847755	2	107840969/107850312
sly02010	ABC transporters	1/291	21/4046	0.792264	0.999599	107842026	LOC107842026	sly:101246375	1	0		1	107842026
sly00510	N-Glycan biosynthesis	2/291	41/4046	0.805678	0.999599	107860690/107844499	LOC107860690/LOC107844499	sly:101260885/sly:543798	2	1	107860690	1	107844499
sly00790	Folate biosynthesis	1/291	22/4046	0.807283	0.999599	107840068	LOC107840068	sly:544238	1	1	107840068	0
sly00860	Porphyrin and chlorophyll metabolism	2/291	43/4046	0.826606	0.999599	107838934/107840763	LOC107838934/LOC107840763	sly:101248153/sly:101257539	2	2	107838934/107840763	0
sly04070	Phosphatidylinositol signaling system	3/291	62/4046	0.834337	0.999599	107860522/107843743/107875799	LOC107860522/LOC107843743/LOC107875799	sly:101251639/sly:544131/sly:101262819	3	3	107860522/107843743/107875799	0
sly00280	Valine, leucine and isoleucine degradation	2/291	44/4046	0.836293	0.999599	107847843/107841325	LOC107847843/LOC107841325	sly:101252846/sly:543993	2	2	107847843/107841325	0
sly00071	Fatty acid degradation	2/291	45/4046	0.84549	0.999599	107839143/107854884	LOC107839143/LOC107854884	sly:101261255/sly:101268145	2	1	107839143	1	107854884
sly00190	Oxidative phosphorylation	5/291	99/4046	0.850931	0.999599	107863537/107842902/107872840/107855885/107863951	LOC107863537/LOC107842902/LOC107872840/LOC107855885/LOC107863951	sly:101258580/sly:101266444/sly:101263124/sly:543862/sly:778317	5	5	107863537/107842902/107872840/107855885/107863951	0
sly04146	Peroxisome	4/291	82/4046	0.852154	0.999599	107845595/107868316/107850312/107854884	LOC107845595/LOC107868316/LOC107850312/LOC107854884	sly:100134875/sly:101252154/sly:543990/sly:101268145	4	1	107845595	3	107868316/107850312/107854884
sly00380	Tryptophan metabolism	1/291	28/4046	0.877201	0.999599	107850312	LOC107850312	sly:543990	1	0		1	107850312
sly00564	Glycerophospholipid metabolism	4/291	87/4046	0.882333	0.999599	107860821/107878499/107870948/107856742	LOC107860821/LOC107878499/LOC107870948/LOC107856742	sly:101261081/sly:101247838/sly:101245364/sly:101268277	4	3	107860821/107878499/107870948	1	107856742
sly00020	Citrate cycle (TCA cycle)	2/291	50/4046	0.884807	0.999599	107844759/107864181	LOC107844759/LOC107864181	sly:778330/sly:101253131	2	2	107844759/107864181	0
sly00310	Lysine degradation	1/291	30/4046	0.894346	0.999599	107839916	LOC107839916	sly:101244804	1	0		1	107839916
sly00920	Sulfur metabolism	1/291	30/4046	0.894346	0.999599	107859432	LOC107859432	sly:101259503	1	1	107859432	0
sly00970	Aminoacyl-tRNA biosynthesis	2/291	52/4046	0.897774	0.999599	107842419/107858954	LOC107842419/LOC107858954	sly:101267264/sly:101260692	2	1	107842419	1	107858954
sly00010	Glycolysis / Gluconeogenesis	5/291	108/4046	0.898253	0.999599	107840969/107866897/107851205/107859988/107867550	LOC107840969/LOC107866897/LOC107851205/LOC107859988/LOC107867550	sly:778210/sly:778211/sly:101263923/sly:101263563/sly:101247124	5	4	107866897/107851205/107859988/107867550	1	107840969
sly03008	Ribosome biogenesis in eukaryotes	3/291	73/4046	0.905515	0.999599	107853493/107847664/107850743	LOC107853493/LOC107847664/LOC107850743	sly:101258364/sly:101258526/sly:101248085	3	0		3	107853493/107847664/107850743
sly00061	Fatty acid biosynthesis	1/291	35/4046	0.927479	0.999599	107854884	LOC107854884	sly:101268145	1	0		1	107854884
sly00640	Propanoate metabolism	1/291	35/4046	0.927479	0.999599	107851205	LOC107851205	sly:101263923	1	1	107851205	0
sly00562	Inositol phosphate metabolism	2/291	59/4046	0.933216	0.999599	107870994/107875799	LOC107870994/LOC107875799	sly:543809/sly:101262819	2	2	107870994/107875799	0
sly03410	Base excision repair	1/291	38/4046	0.942149	0.999599	107845534	LOC107845534	sly:101258999	1	1	107845534	0
sly03060	Protein export	1/291	39/4046	0.94635	0.999599	107878553	LOC107878553	sly:101266091	1	1	107878553	0
sly01212	Fatty acid metabolism	2/291	63/4046	0.947889	0.999599	107839143/107854884	LOC107839143/LOC107854884	sly:101261255/sly:101268145	2	1	107839143	1	107854884
sly00030	Pentose phosphate pathway	1/291	45/4046	0.965882	0.999599	107848158	LOC107848158	sly:101260137	1	1	107848158	0
sly04144	Endocytosis	6/291	152/4046	0.968234	0.999599	107861758/novel.5844/107847805/107860244/107870749/107840467	LOC107861758/-/LOC107847805/LOC107860244/LOC107870749/LOC107840467	sly:101247200/sly:101260916/sly:101258366/sly:101248063/sly:101266058/sly:104644826	6	4	107861758/107847805/107860244/107840467	2	novel.5844/107870749
sly00900	Terpenoid backbone biosynthesis	1/291	46/4046	0.968363	0.999599	107850614	LOC107850614	sly:101250000	1	0		1	107850614
sly03018	RNA degradation	3/291	93/4046	0.968611	0.999599	107875683/107876019/107850743	LOC107875683/LOC107876019/LOC107850743	sly:101258270/sly:101258664/sly:101248085	3	1	107875683	2	107876019/107850743
sly03440	Homologous recombination	1/291	56/4046	0.985148	0.999599	107863385	LOC107863385	sly:101252104	1	0		1	107863385
sly04141	Protein processing in endoplasmic reticulum	5/291	172/4046	0.995927	0.999599	107845380/107878665/107844894/107870243/107844499	LOC107845380/LOC107878665/LOC107844894/LOC107870243/LOC107844499	sly:101260872/sly:101254012/sly:101261860/sly:101262418/sly:543798	5	3	107845380/107878665/107844894	2	107870243/107844499
sly03040	Spliceosome	4/291	153/4046	0.996562	0.999599	novel.444/107862579/107870132/107839163	-/LOC107862579/LOC107870132/LOC107839163	sly:100134885/sly:101265421/sly:101266210/sly:101250160	4	0		4	novel.444/107862579/107870132/107839163
sly03015	mRNA surveillance pathway	2/291	113/4046	0.998075	0.999599	107870112/novel.3449	LOC107870112/-	sly:101260528/sly:101257116	2	1	novel.3449	1	107870112
sly03013	RNA transport	2/291	131/4046	0.999447	0.999599	107861806/107848021	LOC107861806/LOC107848021	sly:101258447/sly:101247869	2	1	107848021	1	107861806
sly03010	Ribosome	5/291	212/4046	0.999599	0.999599	107856146/107864214/107863532/107875827/107875394	LOC107856146/LOC107864214/LOC107863532/LOC107875827/LOC107875394	sly:101260136/sly:101258785/sly:101259181/sly:101268403/sly:101266952	5	5	107856146/107864214/107863532/107875827/107875394	0

## Sheet: cp6vscc0_KEGGenrich
KEGGID	Description	GeneRatio	BgRatio	pvalue	padj	geneID	geneName	keggID	Count	Up	Up_Gene_names	Down	Down_Gene_names
sly00941	Flavonoid biosynthesis	16/842	31/4036	0.000139942	0.0155336	107871256/107860278/107875407/107844729/107871144/107864266/107869735/107860031/107866341/107875625/107844023/107851884/107862334/107840262/107847144/107840863	LOC107871256/LOC107860278/LOC107875407/LOC107844729/LOC107871144/LOC107864266/LOC107869735/LOC107860031/LOC107866341/LOC107875625/LOC107844023/LOC107851884/LOC107862334/LOC107840262/LOC107847144/LOC107840863	sly:778295/sly:101265690/sly:101244196/sly:101261765/sly:101266223/sly:778294/sly:101249699/sly:544150/sly:101251607/sly:101244961/sly:101262367/sly:100191129/sly:101266618/sly:101260278/sly:100736504/sly:544249	16	15	107871256/107860278/107875407/107844729/107871144/107864266/107869735/107860031/107866341/107844023/107851884/107862334/107840262/107847144/107840863	1	107875625
sly04626	Plant-pathogen interaction	48/842	145/4036	0.000316662	0.0175748	107872867/107860522/107842605/107874660/107862088/107843851/107860115/107850465/107860951/107855368/107872603/107859878/107845825/107852145/107861198/107850672/107839265/107877796/107843864/107843743/107840155/107872239/107868306/107855710/107864242/107870741/107868186/107845709/107840981/107858467/107854436/107878147/107874674/107878173/107871975/107855966/107864861/107853809/107863939/107863411…	LOC107872867/LOC107860522/LOC107842605/LOC107874660/LOC107862088/LOC107843851/LOC107860115/LOC107850465/LOC107860951/LOC107855368/LOC107872603/LOC107859878/LOC107845825/LOC107852145/LOC107861198/LOC107850672/LOC107839265/LOC107877796/LOC107843864/LOC107843743/LOC107840155/LOC107872239/LOC107868306/LOC107855710/LOC107864242/LOC107870741/LOC107868186/LOC107845709/LOC107840981/LOC107858467/LOC107854…	sly:101255501/sly:101251639/sly:101268787/sly:101265138/sly:543603/sly:101266882/sly:101256237/sly:101245185/sly:101252553/sly:101253387/sly:544041/sly:101260391/sly:101256817/sly:101245784/sly:544042/sly:101256827/sly:101261749/sly:101250219/sly:101249692/sly:544131/sly:100191111/sly:101055516/sly:544243/sly:543902/sly:543571/sly:101265816/sly:100316879/sly:101244910/sly:101264408/sly:101256435/…	48	41	107872867/107860522/107842605/107874660/107862088/107843851/107860115/107860951/107855368/107872603/107859878/107845825/107852145/107861198/107850672/107839265/107877796/107843864/107843743/107840155/107872239/107868306/107864242/107870741/107868186/107845709/107858467/107854436/107878147/107874674/107878173/107855966/107853809/107863939/107863411/107860484/107842907/107854437/107844051/107878300…	7	107850465/107855710/107840981/107871975/107864861/107863453/107844095
sly00860	Porphyrin and chlorophyll metabolism	17/842	42/4036	0.00288617	0.106788	107838934/107844048/107840763/107866321/107856090/107845383/107870073/107878895/107840071/107863035/107870054/107870727/107868496/107845435/107862250/107877925/107839766	LOC107838934/LOC107844048/LOC107840763/LOC107866321/LOC107856090/LOC107845383/LOC107870073/LOC107878895/LOC107840071/LOC107863035/LOC107870054/LOC107870727/LOC107868496/LOC107845435/LOC107862250/LOC107877925/LOC107839766	sly:101248153/sly:101257518/sly:101257539/sly:778212/sly:101246744/sly:101255435/sly:101244176/sly:101257684/sly:101259974/sly:543967/sly:101248868/sly:101247019/sly:101251358/sly:101244717/sly:101262299/sly:101258872/sly:101244420	17	4	107838934/107840763/107866321/107877925	13	107844048/107856090/107845383/107870073/107878895/107840071/107863035/107870054/107870727/107868496/107845435/107862250/107839766
sly00750	Vitamin B6 metabolism	7/842	4036-12-01	0.00494846	0.13732	107875470/107858266/107875578/107863057/107876074/107861704/107862447	LOC107875470/LOC107858266/LOC107875578/LOC107863057/LOC107876074/LOC107861704/LOC107862447	sly:101257782/sly:101254553/sly:101254971/sly:101244752/sly:101244777/sly:101260521/sly:101259228	7	3	107875470/107858266/107875578	4	107863057/107876074/107861704/107862447
sly00945	Stilbenoid, diarylheptanoid and gingerol biosynthesis	9/842	21/4036	0.0186082	0.336863	107860278/107875407/107844729/107875625/107844023/107851884/107845679/107840262/107840863	LOC107860278/LOC107875407/LOC107844729/LOC107875625/LOC107844023/LOC107851884/LOC107845679/LOC107840262/LOC107840863	sly:101265690/sly:101244196/sly:101261765/sly:101244961/sly:101262367/sly:100191129/sly:101268615/sly:101260278/sly:544249	9	7	107860278/107875407/107844729/107844023/107851884/107840262/107840863	2	107875625/107845679
sly04144	Endocytosis	42/842	150/4036	0.0207994	0.336863	107847805/107861758/107859654/107867978/107875128/107866274/107851527/novel.5844/107859562/107858497/107840467/107838962/107866184/107840559/107860505/107843415/107878256/107860039/107875543/107877979/107866834/107859864/107861872/107866898/107843485/107848113/107858761/107839855/107871116/107870215/novel.514/107838904/107847347/107842981/107861743/107855593/107870749/107875647/107850339/10786953…	LOC107847805/LOC107861758/LOC107859654/LOC107867978/LOC107875128/LOC107866274/LOC107851527/-/LOC107859562/LOC107858497/LOC107840467/LOC107838962/LOC107866184/LOC107840559/LOC107860505/LOC107843415/LOC107878256/LOC107860039/LOC107875543/LOC107877979/LOC107866834/LOC107859864/LOC107861872/LOC107866898/LOC107843485/LOC107848113/LOC107858761/LOC107839855/LOC107871116/LOC107870215/-/LOC107838904/LOC10…	sly:101258366/sly:101247200/sly:101265393/sly:101251739/sly:101260383/sly:544181/sly:101259697/sly:101260916/sly:101258121/sly:101267752/sly:104644826/sly:101266053/sly:101256646/sly:101263355/sly:101246883/sly:101267950/sly:101259044/sly:101246301/sly:100736433/sly:101265657/sly:101248969/sly:101263663/sly:101251365/sly:101261916/sly:101260680/sly:101245162/sly:101248166/sly:101263852/sly:101259…	42	28	107847805/107861758/107859654/107866274/107851527/107859562/107858497/107840467/107840559/107843415/107860039/107875543/107877979/107866834/107859864/107861872/107866898/107843485/107848113/107839855/107870215/107838904/107847347/107855593/107875647/107850339/107869539/107871007	14	107867978/107875128/novel.5844/107838962/107866184/107860505/107878256/107858761/107871116/novel.514/107842981/107861743/107870749/107839388
sly04075	Plant hormone signal transduction	56/842	210/4036	0.0229044	0.336863	107840891/107843441/107868079/novel.6090/107861681/107862455/107857547/107848380/novel.5097/107861852/107867146/107863499/107877900/107861786/107843874/107866619/107840155/107848541/107861654/107869396/107872884/107877442/107867191/107840207/107850490/107873139/107850747/107874961/107849724/107852411/novel.5058/107846008/107867043/107870881/107871774/107844597/107849967/107847535/107861842/107880…	LOC107840891/LOC107843441/LOC107868079/-/LOC107861681/LOC107862455/LOC107857547/LOC107848380/-/LOC107861852/LOC107867146/LOC107863499/LOC107877900/LOC107861786/LOC107843874/LOC107866619/LOC107840155/LOC107848541/LOC107861654/LOC107869396/LOC107872884/LOC107877442/LOC107867191/LOC107840207/LOC107850490/LOC107873139/LOC107850747/LOC107874961/LOC107849724/LOC107852411/-/LOC107846008/LOC107867043/LOC…	sly:100134911/sly:101250944/sly:101267832/sly:101263158/sly:100301927/sly:101260711/sly:101260897/sly:101244285/sly:543600/sly:101055548/sly:101262109/sly:543911/sly:101247936/sly:101055552/sly:101248058/sly:543712/sly:100191111/sly:101247526/sly:543881/sly:101258256/sly:101267127/sly:101255313/sly:101243703/sly:101246970/sly:101261320/sly:101255303/sly:101261048/sly:101055592/sly:101246907/sly:5…	56	34	107840891/107843441/107868079/novel.6090/107861681/107862455/novel.5097/107861852/107877900/107861786/107866619/107840155/107848541/107869396/107877442/107840207/107850747/107874961/107849724/novel.5058/107846008/107867043/107870881/107849967/107842907/107859326/107863934/107877508/107859144/107839829/107861318/107861622/107840500/107867576	22	107857547/107848380/107867146/107863499/107843874/107861654/107872884/107867191/107850490/107873139/107852411/107871774/107844597/107847535/107861842/107880026/107861707/107875710/107872843/107853277/107840503/107843865
sly00360	Phenylalanine metabolism	16/842	47/4036	0.0242784	0.336863	107879725/107854291/107843343/107860278/107875407/107862076/107843092/107845345/107848444/107865520/107847565/107862932/107851006/107870882/107840262/107848433	LOC107879725/LOC107854291/LOC107843343/LOC107860278/LOC107875407/LOC107862076/LOC107843092/LOC107845345/LOC107848444/LOC107865520/LOC107847565/LOC107862932/LOC107851006/LOC107870882/LOC107840262/LOC107848433	sly:778254/sly:101243656/sly:104644402/sly:101265690/sly:101244196/sly:101249624/sly:101243922/sly:101264863/sly:778256/sly:101254423/sly:101255659/sly:101251363/sly:100736464/sly:101257377/sly:101260278/sly:101249664	16	14	107879725/107854291/107860278/107875407/107862076/107843092/107845345/107848444/107865520/107862932/107851006/107870882/107840262/107848433	2	107843343/107847565
sly04130	SNARE interactions in vesicular transport	12/842	33/4036	0.0288838	0.356233	107846179/107843713/107852770/107863302/107839046/107850543/107839663/107839103/107843753/107864604/107852786/107872830	LOC107846179/LOC107843713/LOC107852770/LOC107863302/LOC107839046/LOC107850543/LOC107839663/LOC107839103/LOC107843753/LOC107864604/LOC107852786/LOC107872830	sly:101262338/sly:101247381/sly:101249033/sly:101249333/sly:101246033/sly:101261994/sly:101265370/sly:101250531/sly:101252340/sly:101268613/sly:101251106/sly:101267714	12	9	107846179/107843713/107863302/107850543/107839663/107839103/107843753/107864604/107872830	3	107852770/107839046/107852786
sly04016	MAPK signaling pathway - plant	36/842	132/4036	0.0445494	0.494498	107872867/107860522/107842605/107843441/107873437/107864513/107862088/107840204/107852145/107839265/107866619/107843743/107840155/107864242/107862854/107872884/107869622/107850747/107840981/107849724/107852411/107872955/107877224/107870881/107849967/107850312/107842907/107861707/107875710/107844051/107878300/107840920/107854865/107878318/107844095/107861622	LOC107872867/LOC107860522/LOC107842605/LOC107843441/LOC107873437/LOC107864513/LOC107862088/LOC107840204/LOC107852145/LOC107839265/LOC107866619/LOC107843743/LOC107840155/LOC107864242/LOC107862854/LOC107872884/LOC107869622/LOC107850747/LOC107840981/LOC107849724/LOC107852411/LOC107872955/LOC107877224/LOC107870881/LOC107849967/LOC107850312/LOC107842907/LOC107861707/LOC107875710/LOC107844051/LOC107878…	sly:101255501/sly:101251639/sly:101268787/sly:101250944/sly:543880/sly:101246650/sly:543603/sly:101262346/sly:101245784/sly:101261749/sly:543712/sly:544131/sly:100191111/sly:543571/sly:543948/sly:101267127/sly:104647127/sly:101261048/sly:101264408/sly:101246907/sly:544228/sly:101249467/sly:101254612/sly:544165/sly:101265792/sly:543990/sly:544123/sly:100316894/sly:543518/sly:101243958/sly:10126434…	36	29	107872867/107860522/107842605/107843441/107873437/107864513/107862088/107840204/107852145/107839265/107866619/107843743/107840155/107864242/107862854/107869622/107850747/107849724/107872955/107877224/107870881/107849967/107842907/107844051/107878300/107840920/107854865/107878318/107861622	7	107872884/107840981/107852411/107850312/107861707/107875710/107844095
sly00400	Phenylalanine, tyrosine and tryptophan biosynthesis	13/842	40/4036	0.0572459	0.577663	107867463/107842110/107867808/107845345/107875636/107839528/107859273/107851006/107842508/107845682/107845710/107873327/107859855	LOC107867463/LOC107842110/LOC107867808/LOC107845345/LOC107875636/LOC107839528/LOC107859273/LOC107851006/LOC107842508/LOC107845682/LOC107845710/LOC107873327/LOC107859855	sly:544153/sly:101259361/sly:543970/sly:101264863/sly:101247331/sly:101255433/sly:101251841/sly:100736464/sly:543548/sly:101256422/sly:101258500/sly:101264432/sly:544273	13	11	107867463/107842110/107867808/107845345/107875636/107839528/107851006/107842508/107845682/107845710/107859855	2	107859273/107873327
sly00710	Carbon fixation in photosynthetic organisms	20/842	69/4036	0.0674076	0.62352	107862248/107848158/107845282/107860923/107869777/107867324/107840104/107867663/107852742/107840119/107858551/107870788/107842298/107847729/107871105/107843118/107870207/107878607/107842361/107876048	LOC107862248/LOC107848158/LOC107845282/LOC107860923/LOC107869777/LOC107867324/LOC107840104/LOC107867663/LOC107852742/LOC107840119/LOC107858551/LOC107870788/LOC107842298/LOC107847729/LOC107871105/LOC107843118/LOC107870207/LOC107878607/LOC107842361/LOC107876048	sly:101258932/sly:101260137/sly:101256813/sly:101246035/sly:101255322/sly:543812/sly:101253137/sly:101266629/sly:101258368/sly:778286/sly:101249787/sly:101248407/sly:101258131/sly:101265236/sly:100316873/sly:101264854/sly:101260332/sly:101267723/sly:101258530/sly:101260239	20	11	107862248/107848158/107845282/107867324/107852742/107858551/107842298/107847729/107870207/107878607/107876048	9	107860923/107869777/107840104/107867663/107840119/107870788/107871105/107843118/107842361
sly00910	Nitrogen metabolism	7/842	20/4036	0.103593	0.80761	107840295/107867964/107858815/107870519/107860201/107843241/107842882	LOC107840295/LOC107867964/LOC107858815/LOC107870519/LOC107860201/LOC107843241/LOC107842882	sly:778325/sly:100736473/sly:101257730/sly:544275/sly:101258424/sly:101254722/sly:101257401	7	6	107840295/107867964/107858815/107870519/107843241/107842882	1	107860201
sly00906	Carotenoid biosynthesis	10/842	32/4036	0.111557	0.80761	107850059/107852027/107868281/107843894/107867833/107846808/107863219/107851558/107850430/107849959	LOC107850059/LOC107852027/LOC107868281/LOC107843894/LOC107867833/LOC107846808/LOC107863219/LOC107851558/LOC107850430/LOC107849959	sly:101249565/sly:544163/sly:543988/sly:101267662/sly:100136887/sly:100316877/sly:544297/sly:101267857/sly:543696/sly:101250828	10	7	107850059/107852027/107868281/107846808/107863219/107850430/107849959	3	107843894/107867833/107851558
sly00620	Pyruvate metabolism	22/842	82/4036	0.115652	0.80761	107862248/107862684/107851945/107862685/107867324/107847964/107846976/107871223/107862877/107871444/107864063/107864665/107840119/107870788/107842298/107847937/107867486/107873262/107878607/107843171/107842361/107851004	LOC107862248/LOC107862684/LOC107851945/LOC107862685/LOC107867324/LOC107847964/LOC107846976/LOC107871223/LOC107862877/LOC107871444/LOC107864063/LOC107864665/LOC107840119/LOC107870788/LOC107842298/LOC107847937/LOC107867486/LOC107873262/LOC107878607/LOC107843171/LOC107842361/LOC107851004	sly:101258932/sly:101267395/sly:101251907/sly:101267103/sly:543812/sly:544161/sly:101254485/sly:544237/sly:101248181/sly:543869/sly:101265278/sly:101261160/sly:778286/sly:101248407/sly:101258131/sly:101254693/sly:101252012/sly:101247226/sly:101267723/sly:101248036/sly:101258530/sly:101265715	22	15	107862248/107862684/107851945/107862685/107867324/107847964/107871223/107862877/107864063/107842298/107847937/107867486/107873262/107878607/107843171	7	107846976/107871444/107864665/107840119/107870788/107842361/107851004
sly01200	Carbon metabolism	58/842	241/4036	0.119815	0.80761	107862248/107867550/107850886/novel.4076/107848158/107858266/107845282/107839921/107862684/107870847/107862685/107860923/107869777/novel.4699/107842526/107840829/107867324/107840104/107871223/107862877/107871444/107867663/107860201/107852742/107861787/107864063/107861682/107864665/107878792/107867453/107840119/107847434/novel.946/107858551/107870788/107842298/107851286/107850312/107847937/1078477…	LOC107862248/LOC107867550/LOC107850886/-/LOC107848158/LOC107858266/LOC107845282/LOC107839921/LOC107862684/LOC107870847/LOC107862685/LOC107860923/LOC107869777/-/LOC107842526/LOC107840829/LOC107867324/LOC107840104/LOC107871223/LOC107862877/LOC107871444/LOC107867663/LOC107860201/LOC107852742/LOC107861787/LOC107864063/LOC107861682/LOC107864665/LOC107878792/LOC107867453/LOC107840119/LOC107847434/-/LOC…	sly:101258932/sly:101247124/sly:101255258/sly:101260070/sly:101260137/sly:101254553/sly:101256813/sly:101250548/sly:101267395/sly:101253277/sly:101267103/sly:101246035/sly:101255322/sly:101249507/sly:101251366/sly:101252984/sly:543812/sly:101253137/sly:544237/sly:101248181/sly:543869/sly:101266629/sly:101258424/sly:101258368/sly:543779/sly:101265278/sly:101255570/sly:101261160/sly:101257583/sly:1…	58	34	107862248/107867550/107850886/107848158/107858266/107845282/107839921/107862684/107870847/107862685/107867324/107871223/107862877/107852742/107864063/107861682/107878792/107867453/107858551/107842298/107851286/107847937/107847729/107845595/107852749/107844927/107870207/107878607/107861619/107843171/107863060/107853880/107870147/107876048	24	novel.4076/107860923/107869777/novel.4699/107842526/107840829/107840104/107871444/107867663/107860201/107861787/107864665/107840119/107847434/novel.946/107870788/107850312/107871105/107843118/107841728/107838932/107842361/107851004/107878013
sly00290	Valine, leucine and isoleucine biosynthesis	6/842	17/4036	0.123688	0.80761	107850416/107851945/107851037/107871259/107841728/107853330	LOC107850416/LOC107851945/LOC107851037/LOC107871259/LOC107841728/LOC107853330	sly:101252944/sly:101251907/sly:101253875/sly:101246533/sly:543983/sly:101247891	6	3	107851945/107851037/107871259	3	107850416/107841728/107853330
sly00520	Amino sugar and nucleotide sugar metabolism	27/842	105/4036	0.13266	0.816399	107854073/107875632/107860470/107852117/107862290/107859000/107850846/107864032/107877663/107845431/107843374/107839422/107840845/107850962/107872499/107866396/107845778/107839408/107861787/107845415/107861169/107840015/107878318/107867403/107864663/107843457/107875763	LOC107854073/LOC107875632/LOC107860470/LOC107852117/LOC107862290/LOC107859000/LOC107850846/LOC107864032/LOC107877663/LOC107845431/LOC107843374/LOC107839422/LOC107840845/LOC107850962/LOC107872499/LOC107866396/LOC107845778/LOC107839408/LOC107861787/LOC107845415/LOC107861169/LOC107840015/LOC107878318/LOC107867403/LOC107864663/LOC107843457/LOC107875763	sly:101258487/sly:101244155/sly:101263958/sly:101247451/sly:101261402/sly:101267862/sly:101265535/sly:101246662/sly:101257483/sly:101260709/sly:101257718/sly:100316902/sly:101251855/sly:101248935/sly:101268802/sly:101266358/sly:101247969/sly:778245/sly:543779/sly:101261310/sly:101250823/sly:543515/sly:101267358/sly:101267885/sly:100316874/sly:100529103/sly:544022	27	21	107854073/107875632/107860470/107852117/107862290/107859000/107850846/107864032/107877663/107845431/107843374/107839422/107840845/107850962/107872499/107839408/107861169/107878318/107867403/107864663/107875763	6	107866396/107845778/107861787/107845415/107840015/107843457
sly00052	Galactose metabolism	13/842	46/4036	0.145089	0.816399	107843684/107840322/107860671/107839109/107863437/107859925/107850962/107845778/107840458/107861787/107859669/107867403/107870147	LOC107843684/LOC107840322/LOC107860671/LOC107839109/LOC107863437/LOC107859925/LOC107850962/LOC107845778/LOC107840458/LOC107861787/LOC107859669/LOC107867403/LOC107870147	sly:543502/sly:101263843/sly:101257623/sly:544236/sly:543992/sly:100316891/sly:101248935/sly:101247969/sly:101261450/sly:543779/sly:101266532/sly:101267885/sly:101245938	13	9	107843684/107840322/107860671/107859925/107850962/107840458/107859669/107867403/107870147	4	107839109/107863437/107845778/107861787
sly00740	Riboflavin metabolism	5/842	14/4036	0.148695	0.816399	107840068/107862848/107870529/107856184/107847006	LOC107840068/LOC107862848/LOC107870529/LOC107856184/LOC107847006	sly:544238/sly:101249252/sly:101260420/sly:101261429/sly:101259864	5	5	107840068/107862848/107870529/107856184/107847006	0
sly00770	Pantothenate and CoA biosynthesis	6/842	18/4036	0.154454	0.816399	107847764/107850416/107852132/107851037/107871259/107853330	LOC107847764/LOC107850416/LOC107852132/LOC107851037/LOC107871259/LOC107853330	sly:101263146/sly:101252944/sly:101267963/sly:101253875/sly:101246533/sly:101247891	6	4	107847764/107852132/107851037/107871259	2	107850416/107853330
sly00630	Glyoxylate and dicarboxylate metabolism	17/842	64/4036	0.163852	0.826706	107858887/107862248/107839921/107862684/107862685/107870519/107871223/107860201/107861682/107840119/107851286/107850312/107847729/107845595/107838932/107842361/107851004	LOC107858887/LOC107862248/LOC107839921/LOC107862684/LOC107862685/LOC107870519/LOC107871223/LOC107860201/LOC107861682/LOC107840119/LOC107851286/LOC107850312/LOC107847729/LOC107845595/LOC107838932/LOC107842361/LOC107851004	sly:101251259/sly:101258932/sly:101250548/sly:101267395/sly:101267103/sly:544275/sly:544237/sly:101258424/sly:101255570/sly:778286/sly:101249417/sly:543990/sly:101265236/sly:100134875/sly:101263138/sly:101258530/sly:101265715	17	11	107858887/107862248/107839921/107862684/107862685/107870519/107871223/107861682/107851286/107847729/107845595	6	107860201/107840119/107850312/107838932/107842361/107851004
sly01230	Biosynthesis of amino acids	47/842	201/4036	0.206504	0.967383	107867463/107842110/107850602/novel.5432/107867808/107867550/107845345/107848158/107875636/107870410/107858266/107845282/107839921/107850416/107840659/107851945/107860923/107839528/107859273/107870519/107876074/107861704/107851037/107852742/107851006/107864665/107878792/novel.1104/107842508/107871259/107858551/107847729/107845682/107843118/107845710/107841728/107870207/107838932/107861619/1078733…	LOC107867463/LOC107842110/LOC107850602/-/LOC107867808/LOC107867550/LOC107845345/LOC107848158/LOC107875636/LOC107870410/LOC107858266/LOC107845282/LOC107839921/LOC107850416/LOC107840659/LOC107851945/LOC107860923/LOC107839528/LOC107859273/LOC107870519/LOC107876074/LOC107861704/LOC107851037/LOC107852742/LOC107851006/LOC107864665/LOC107878792/-/LOC107842508/LOC107871259/LOC107858551/LOC107847729/LOC10…	sly:544153/sly:101259361/sly:101247506/sly:101245890/sly:543970/sly:101247124/sly:101264863/sly:101260137/sly:101247331/sly:101248664/sly:101254553/sly:101256813/sly:101250548/sly:101252944/sly:543751/sly:101251907/sly:101246035/sly:101255433/sly:101251841/sly:544275/sly:101244777/sly:101260521/sly:101253875/sly:101258368/sly:100736464/sly:101261160/sly:101257583/sly:101266787/sly:543548/sly:1012…	47	33	107867463/107842110/107850602/107867808/107867550/107845345/107848158/107875636/107858266/107845282/107839921/107851945/107839528/107870519/107851037/107852742/107851006/107878792/novel.1104/107842508/107871259/107858551/107847729/107845682/107845710/107870207/107861619/107843171/107851677/107853880/107870147/107859855/107876048	14	novel.5432/107870410/107850416/107840659/107860923/107859273/107876074/107861704/107864665/107843118/107841728/107838932/107873327/107853330
sly00380	Tryptophan metabolism	8/842	28/4036	0.214052	0.967383	107843343/107842047/107861847/107847565/107845856/107846976/107850312/107851600	LOC107843343/LOC107842047/LOC107861847/LOC107847565/LOC107845856/LOC107846976/LOC107850312/LOC107851600	sly:104644402/sly:101267265/sly:101244469/sly:101255659/sly:101262573/sly:101254485/sly:543990/sly:101253797	8	4	107842047/107861847/107845856/107851600	4	107843343/107847565/107846976/107850312
sly04145	Phagosome	19/842	76/4036	0.222051	0.967383	novel.3171/107863302/107859654/107873469/107853469/107871474/107854460/107875430/107843763/107867960/107868196/107850543/107859856/107855593/107863951/107850339/107845374/107858894/107862418	-/LOC107863302/LOC107859654/LOC107873469/LOC107853469/LOC107871474/LOC107854460/LOC107875430/LOC107843763/LOC107867960/LOC107868196/LOC107850543/LOC107859856/LOC107855593/LOC107863951/LOC107850339/LOC107845374/LOC107858894/LOC107862418	sly:101245021/sly:101249333/sly:101265393/sly:101262621/sly:101265829/sly:101254490/sly:101252196/sly:101258760/sly:101248630/sly:101259601/sly:101244348/sly:101261994/sly:104645763/sly:101257955/sly:778317/sly:101263553/sly:101245703/sly:101264086/sly:101252165	19	12	107863302/107859654/107873469/107871474/107868196/107850543/107859856/107855593/107863951/107850339/107858894/107862418	7	novel.3171/107853469/107854460/107875430/107843763/107867960/107845374
sly04120	Ubiquitin mediated proteolysis	25/842	103/4036	0.226594	0.967383	107845380/107850670/107875215/107843162/107845655/107842184/107839306/107845146/107843071/107878629/107860548/107878611/107859035/107840439/107843482/107851560/107870243/107839088/novel.3146/107843742/107878858/107851540/107839205/107842658/107864781	LOC107845380/LOC107850670/LOC107875215/LOC107843162/LOC107845655/LOC107842184/LOC107839306/LOC107845146/LOC107843071/LOC107878629/LOC107860548/LOC107878611/LOC107859035/LOC107840439/LOC107843482/LOC107851560/LOC107870243/LOC107839088/-/LOC107843742/LOC107878858/LOC107851540/LOC107839205/LOC107842658/LOC107864781	sly:101260872/sly:101249698/sly:101247534/sly:101250834/sly:101251072/sly:543547/sly:101253831/sly:101265083/sly:101248607/sly:101246723/sly:101258213/sly:101266538/sly:101260503/sly:101267748/sly:101254991/sly:101257937/sly:101262418/sly:101254223/sly:101255653/sly:101254146/sly:101264951/sly:101244826/sly:101265863/sly:101253520/sly:101253514	25	15	107845380/107850670/107842184/107839306/107845146/107843071/107878629/107860548/107878611/107859035/107840439/107843742/107878858/107839205/107864781	10	107875215/107843162/107845655/107843482/107851560/107870243/107839088/novel.3146/107851540/107842658
sly00561	Glycerolipid metabolism	17/842	68/4036	0.238587	0.980858	107878499/107877723/107858578/107867060/107862846/107842839/107877877/107846976/107864034/107842944/107855115/107875629/107840795/107856750/107867147/107870261/107871044	LOC107878499/LOC107877723/LOC107858578/LOC107867060/LOC107862846/LOC107842839/LOC107877877/LOC107846976/LOC107864034/LOC107842944/LOC107855115/LOC107875629/LOC107840795/LOC107856750/LOC107867147/LOC107870261/LOC107871044	sly:101247838/sly:101259856/sly:101256743/sly:101248193/sly:101249534/sly:101256514/sly:101264840/sly:101254485/sly:101246087/sly:101243737/sly:101262422/sly:101261928/sly:101263085/sly:101267988/sly:101261812/sly:101266812/sly:543901	17	12	107878499/107877723/107858578/107867060/107862846/107842839/107877877/107864034/107855115/107840795/107870261/107871044	5	107846976/107842944/107875629/107856750/107867147
sly00908	Zeatin biosynthesis	7/842	25/4036	0.253936	0.991905	107854914/107843843/107843853/107842013/107843844/107847679/107866953	LOC107854914/LOC107843843/LOC107843853/LOC107842013/LOC107843844/LOC107847679/LOC107866953	sly:100874537/sly:101246295/sly:100874536/sly:100874543/sly:101251633/sly:101268254/sly:101055612	7	4	107854914/107843843/107842013/107847679	3	107843853/107843844/107866953
sly00010	Glycolysis / Gluconeogenesis	25/842	107/4036	0.294295	0.991905	107867550/107845282/107842839/107842526/107840829/107867324/107840104/107846976/107871223/107845990/107862877/107867663/107852742/107861787/107864665/107867453/107858551/107847937/107867486/107843118/107870207/107867403/107843171/107851004/107870147	LOC107867550/LOC107845282/LOC107842839/LOC107842526/LOC107840829/LOC107867324/LOC107840104/LOC107846976/LOC107871223/LOC107845990/LOC107862877/LOC107867663/LOC107852742/LOC107861787/LOC107864665/LOC107867453/LOC107858551/LOC107847937/LOC107867486/LOC107843118/LOC107870207/LOC107867403/LOC107843171/LOC107851004/LOC107870147	sly:101247124/sly:101256813/sly:101256514/sly:101251366/sly:101252984/sly:543812/sly:101253137/sly:101254485/sly:544237/sly:101247173/sly:101248181/sly:101266629/sly:101258368/sly:543779/sly:101261160/sly:101244369/sly:101249787/sly:101254693/sly:101252012/sly:101264854/sly:101260332/sly:101267885/sly:101248036/sly:101265715/sly:101245938	25	16	107867550/107845282/107842839/107867324/107871223/107845990/107862877/107852742/107867453/107858551/107847937/107867486/107870207/107867403/107843171/107870147	9	107842526/107840829/107840104/107846976/107867663/107861787/107864665/107843118/107851004
sly00053	Ascorbate and aldarate metabolism	9/842	35/4036	0.298064	0.991905	107860470/107862290/107875751/107839422/107870111/107840121/107846976/107864663/107875512	LOC107860470/LOC107862290/LOC107875751/LOC107839422/LOC107870111/LOC107840121/LOC107846976/LOC107864663/LOC107875512	sly:101263958/sly:101261402/sly:101055572/sly:100316902/sly:544280/sly:101254135/sly:101254485/sly:100316874/sly:101253411	9	7	107860470/107862290/107875751/107839422/107870111/107864663/107875512	2	107840121/107846976
sly00650	Butanoate metabolism	6/842	22/4036	0.302502	0.991905	107857412/107850416/107851288/107841645/107838791/107853330	LOC107857412/LOC107850416/LOC107851288/LOC107841645/LOC107838791/LOC107853330	sly:100134904/sly:101252944/sly:101260619/sly:101259975/sly:101259235/sly:101247891	6	3	107857412/107851288/107838791	3	107850416/107841645/107853330
sly00190	Oxidative phosphorylation	23/842	99/4036	0.315499	0.991905	107863537/107842902/107870847/107847386/107862949/107854242/107871474/107839176/107875430/107851667/107877967/107862934/107870455/107870044/107863951/107871153/107851153/107874626/107864012/107845374/107858894/107851056/107851496	LOC107863537/LOC107842902/LOC107870847/LOC107847386/LOC107862949/LOC107854242/LOC107871474/LOC107839176/LOC107875430/LOC107851667/LOC107877967/LOC107862934/LOC107870455/LOC107870044/LOC107863951/LOC107871153/LOC107851153/LOC107874626/LOC107864012/LOC107845374/LOC107858894/LOC107851056/LOC107851496	sly:101258580/sly:101266444/sly:101253277/sly:101261919/sly:101267099/sly:101258567/sly:101254490/sly:101244808/sly:101258760/sly:101251020/sly:101263827/sly:101244937/sly:101255084/sly:101250008/sly:778317/sly:101268282/sly:101247776/sly:101252593/sly:101252923/sly:101245703/sly:101264086/sly:101246900/sly:101255053	23	20	107863537/107842902/107870847/107847386/107862949/107854242/107871474/107839176/107877967/107862934/107870455/107870044/107863951/107871153/107851153/107874626/107864012/107858894/107851056/107851496	3	107875430/107851667/107845374
sly00500	Starch and sucrose metabolism	26/842	113/4036	0.319502	0.991905	107863145/107869091/107864541/107843684/107859190/107870811/107852961/107863437/107864054/107866823/107850962/107864313/107870503/107861787/107862814/107867836/107863104/107852065/107869182/107861169/107860527/107878565/107878002/107867403/107840883/107875763	LOC107863145/LOC107869091/LOC107864541/LOC107843684/LOC107859190/LOC107870811/LOC107852961/LOC107863437/LOC107864054/LOC107866823/LOC107850962/LOC107864313/LOC107870503/LOC107861787/LOC107862814/LOC107867836/LOC107863104/LOC107852065/LOC107869182/LOC107861169/LOC107860527/LOC107878565/LOC107878002/LOC107867403/LOC107840883/LOC107875763	sly:101250960/sly:101253815/sly:100736451/sly:543502/sly:101245612/sly:101262611/sly:101247621/sly:543992/sly:101253025/sly:101250886/sly:101248935/sly:101055573/sly:101259862/sly:543779/sly:101255377/sly:101254670/sly:101259221/sly:101268420/sly:101255272/sly:101250823/sly:101252941/sly:100134910/sly:101249741/sly:101267885/sly:543961/sly:544022	26	19	107863145/107869091/107864541/107843684/107859190/107852961/107866823/107850962/107864313/107862814/107867836/107863104/107852065/107861169/107878565/107878002/107867403/107840883/107875763	7	107870811/107863437/107864054/107870503/107861787/107869182/107860527
sly00592	alpha-Linolenic acid metabolism	9/842	36/4036	0.329967	0.991905	107861665/107867080/107839143/107854684/107850386/107877738/107840371/107850651/107848240	LOC107861665/LOC107867080/LOC107839143/LOC107854684/LOC107850386/LOC107877738/LOC107840371/LOC107850651/LOC107848240	sly:544009/sly:606711/sly:101261255/sly:544306/sly:101251665/sly:543763/sly:100736436/sly:101248256/sly:101266902	9	7	107861665/107867080/107839143/107854684/107850386/107877738/107840371	2	107850651/107848240
sly00030	Pentose phosphate pathway	11/842	45/4036	0.330349	0.991905	107848158/107840104/107867663/107847434/107858551/107852749/107844927/107867403/107863060/107853880/107870147	LOC107848158/LOC107840104/LOC107867663/LOC107847434/LOC107858551/LOC107852749/LOC107844927/LOC107867403/LOC107863060/LOC107853880/LOC107870147	sly:101260137/sly:101253137/sly:101266629/sly:101264118/sly:101249787/sly:101247915/sly:101247372/sly:101267885/sly:101262229/sly:543623/sly:101245938	11	8	107848158/107858551/107852749/107844927/107867403/107863060/107853880/107870147	3	107840104/107867663/107847434
sly00900	Terpenoid backbone biosynthesis	11/842	45/4036	0.330349	0.991905	107857663/107857412/107863738/107850614/107872939/107859749/107851288/107856323/107850997/107843186/107862250	LOC107857663/LOC107857412/LOC107863738/LOC107850614/LOC107872939/LOC107859749/LOC107851288/LOC107856323/LOC107850997/LOC107843186/LOC107862250	sly:101265292/sly:100134904/sly:543552/sly:101250000/sly:101250227/sly:543702/sly:101260619/sly:101266434/sly:100134900/sly:101246371/sly:101262299	11	9	107857663/107857412/107863738/107872939/107859749/107851288/107856323/107850997/107843186	2	107850614/107862250
sly00600	Sphingolipid metabolism	6/842	23/4036	0.343259	0.991905	107862365/107838845/107873887/107847829/107848076/107866917	LOC107862365/LOC107838845/LOC107873887/LOC107847829/LOC107848076/LOC107866917	sly:778364/sly:101244511/sly:101246439/sly:101252083/sly:101267524/sly:101262727	6	3	107862365/107838845/107866917	3	107873887/107847829/107848076
sly00511	Other glycan degradation	3/842	4036-10-01	0.348314	0.991905	107863528/107847487/107843457	LOC107863528/LOC107847487/LOC107843457	sly:101267007/sly:101249430/sly:100529103	3	0		3	107863528/107847487/107843457
sly00330	Arginine and proline metabolism	11/842	46/4036	0.359344	0.991905	107859655/107843343/107860213/107840486/107870798/107847565/107866830/107846976/107863453/107847876/107867377	LOC107859655/LOC107843343/LOC107860213/LOC107840486/LOC107870798/LOC107847565/LOC107866830/LOC107846976/LOC107863453/LOC107847876/LOC107867377	sly:101264170/sly:104644402/sly:101254254/sly:543960/sly:101249640/sly:101255659/sly:544209/sly:101254485/sly:778272/sly:544141/sly:101246987	11	5	107859655/107860213/107840486/107866830/107847876	6	107843343/107870798/107847565/107846976/107863453/107867377
sly00220	Arginine biosynthesis	7/842	28/4036	0.364105	0.991905	107840659/107860923/107870519/107868058/107863453/107847729/107876048	LOC107840659/LOC107860923/LOC107870519/LOC107868058/LOC107863453/LOC107847729/LOC107876048	sly:543751/sly:101246035/sly:544275/sly:101264119/sly:778272/sly:101265236/sly:101260239	7	3	107870519/107847729/107876048	4	107840659/107860923/107868058/107863453
sly00260	Glycine, serine and threonine metabolism	14/842	60/4036	0.366379	0.991905	107867550/107870410/107858266/107839921/107839528/107865520/107876074/107871223/107861704/107847729/107845682/107841728/107838932/107861619	LOC107867550/LOC107870410/LOC107858266/LOC107839921/LOC107839528/LOC107865520/LOC107876074/LOC107871223/LOC107861704/LOC107847729/LOC107845682/LOC107841728/LOC107838932/LOC107861619	sly:101247124/sly:101248664/sly:101254553/sly:101250548/sly:101255433/sly:101254423/sly:101244777/sly:544237/sly:101260521/sly:101265236/sly:101256422/sly:543983/sly:101263138/sly:101266918	14	9	107867550/107858266/107839921/107839528/107865520/107871223/107847729/107845682/107861619	5	107870410/107876074/107861704/107841728/107838932
sly04070	Phosphatidylinositol signaling system	14/842	61/4036	0.392162	0.999999	107860522/107867978/107843743/107850486/107851080/107870111/107854460/107875799/107867960/107855115/107866973/107844051/107858484/107868461	LOC107860522/LOC107867978/LOC107843743/LOC107850486/LOC107851080/LOC107870111/LOC107854460/LOC107875799/LOC107867960/LOC107855115/LOC107866973/LOC107844051/LOC107858484/LOC107868461	sly:101251639/sly:101251739/sly:544131/sly:101253265/sly:101253363/sly:544280/sly:101252196/sly:101262819/sly:101259601/sly:101262422/sly:101263310/sly:101243958/sly:101251565/sly:101259812	14	9	107860522/107843743/107850486/107870111/107875799/107855115/107866973/107844051/107858484	5	107867978/107851080/107854460/107867960/107868461
sly00270	Cysteine and methionine metabolism	18/842	80/4036	0.40143	0.999999	107864513/107853805/107850602/107862248/107845345/107861847/107863678/107863655/107842189/107840630/107851037/107878792/107840119/107867486/107841366/107838873/107870915/107842361	LOC107864513/LOC107853805/LOC107850602/LOC107862248/LOC107845345/LOC107861847/LOC107863678/LOC107863655/LOC107842189/LOC107840630/LOC107851037/LOC107878792/LOC107840119/LOC107867486/LOC107841366/LOC107838873/LOC107870915/LOC107842361	sly:101246650/sly:544052/sly:101247506/sly:101258932/sly:101264863/sly:101244469/sly:100301940/sly:101263926/sly:101251255/sly:101258894/sly:101253875/sly:101257583/sly:778286/sly:101252012/sly:543506/sly:101266846/sly:101267603/sly:101258530	18	12	107864513/107853805/107850602/107862248/107845345/107861847/107863678/107842189/107851037/107878792/107867486/107838873	6	107863655/107840630/107840119/107841366/107870915/107842361
sly04122	Sulfur relay system	3/842	4036-11-01	0.411255	0.999999	107859361/107863678/107872672	LOC107859361/LOC107863678/LOC107872672	sly:101247277/sly:100301940/sly:101266365	3	2	107863678/107872672	1	107859361
sly00940	Phenylpropanoid biosynthesis	24/842	109/4036	0.419639	0.999999	107851630/107854291/107840027/107860278/107875407/107862076/107868752/107843092/107844729/107874082/107862932/107875625/107860325/107859012/107844023/107851884/107869182/107875336/107840262/107848279/107876528/107863356/107840863/107853838	LOC107851630/LOC107854291/LOC107840027/LOC107860278/LOC107875407/LOC107862076/LOC107868752/LOC107843092/LOC107844729/LOC107874082/LOC107862932/LOC107875625/LOC107860325/LOC107859012/LOC107844023/LOC107851884/LOC107869182/LOC107875336/LOC107840262/LOC107848279/LOC107876528/LOC107863356/LOC107840863/LOC107853838	sly:101260194/sly:101243656/sly:544293/sly:101265690/sly:101244196/sly:101249624/sly:101253377/sly:101243922/sly:101261765/sly:101261260/sly:101251363/sly:101244961/sly:101255060/sly:101265606/sly:101262367/sly:100191129/sly:101255272/sly:101247834/sly:101260278/sly:101266599/sly:101264739/sly:101266098/sly:544249/sly:101249763	24	18	107851630/107854291/107840027/107860278/107875407/107862076/107868752/107843092/107844729/107862932/107860325/107844023/107851884/107875336/107840262/107848279/107840863/107853838	6	107874082/107875625/107859012/107869182/107876528/107863356
sly00563	Glycosylphosphatidylinositol (GPI)-anchor biosynthesis	5/842	21/4036	0.453538	0.999999	107848032/107859837/107869996/107842663/107858818	LOC107848032/LOC107859837/LOC107869996/LOC107842663/LOC107858818	sly:101250029/sly:101248350/sly:101253473/sly:101254419/sly:101256836	5	0		5	107848032/107859837/107869996/107842663/107858818
sly04712	Circadian rhythm - plant	9/842	40/4036	0.460903	0.999999	107850670/107862999/107871256/107845418/107842184/107864266/107838859/107845420/107864177	LOC107850670/LOC107862999/LOC107871256/LOC107845418/LOC107842184/LOC107864266/LOC107838859/LOC107845420/LOC107864177	sly:101249698/sly:101250283/sly:778295/sly:101262866/sly:543547/sly:778294/sly:543733/sly:544176/sly:543596	9	7	107850670/107862999/107871256/107845418/107842184/107864266/107838859	2	107845420/107864177
sly00350	Tyrosine metabolism	8/842	36/4036	0.485731	0.999999	107845345/107842526/107840829/107865520/107879874/107851006/107867453/107870882	LOC107845345/LOC107842526/LOC107840829/LOC107865520/LOC107879874/LOC107851006/LOC107867453/LOC107870882	sly:101264863/sly:101251366/sly:101252984/sly:101254423/sly:101258990/sly:100736464/sly:101244369/sly:101257377	8	6	107845345/107865520/107879874/107851006/107867453/107870882	2	107842526/107840829
sly00073	Cutin, suberine and wax biosynthesis	5/842	22/4036	0.497961	0.999999	107870644/107862886/107838798/107844196/107848464	LOC107870644/LOC107862886/LOC107838798/LOC107844196/LOC107848464	sly:101266813/sly:101257641/sly:101245874/sly:101267647/sly:101255461	5	5	107870644/107862886/107838798/107844196/107848464	0
sly00590	Arachidonic acid metabolism	3/842	13/4036	0.529982	0.999999	107866862/107864929/107854033	LOC107866862/LOC107864929/LOC107854033	sly:101268179/sly:544197/sly:101267727	3	3	107866862/107864929/107854033	0
sly00591	Linoleic acid metabolism	3/842	13/4036	0.529982	0.999999	107861665/107865522/107864114	LOC107861665/LOC107865522/LOC107864114	sly:544009/sly:101257007/sly:101256707	3	3	107861665/107865522/107864114	0
sly04933	AGE-RAGE signaling pathway in diabetic complications	3/842	13/4036	0.529982	0.999999	107868196/107859856/107862418	LOC107868196/LOC107859856/LOC107862418	sly:101244348/sly:104645763/sly:101252165	3	3	107868196/107859856/107862418	0
sly00040	Pentose and glucuronate interconversions	15/842	72/4036	0.549773	0.999999	107860470/107862290/107861639/107842557/107842839/107875046/107850962/107843830/107874776/107867312/107864051/107871435/107870057/107867311/107875945	LOC107860470/LOC107862290/LOC107861639/LOC107842557/LOC107842839/LOC107875046/LOC107850962/LOC107843830/LOC107874776/LOC107867312/LOC107864051/LOC107871435/LOC107870057/LOC107867311/LOC107875945	sly:101263958/sly:101261402/sly:101245743/sly:101261266/sly:101256514/sly:101246061/sly:101248935/sly:544051/sly:101264436/sly:101245156/sly:101266973/sly:101264933/sly:101247806/sly:101244576/sly:101246909	15	12	107860470/107862290/107861639/107842839/107875046/107850962/107843830/107874776/107864051/107871435/107870057/107875945	3	107842557/107867312/107867311
sly00130	Ubiquinone and other terpenoid-quinone biosynthesis	8/842	38/4036	0.552939	0.999999	107875407/107862076/107845345/107848299/107862932/107862393/107870882/107870331	LOC107875407/LOC107862076/LOC107845345/LOC107848299/LOC107862932/LOC107862393/LOC107870882/LOC107870331	sly:101244196/sly:101249624/sly:101264863/sly:101262657/sly:101251363/sly:101246522/sly:101257377/sly:101248379	8	7	107875407/107862076/107845345/107848299/107862932/107870882/107870331	1	107862393
sly00562	Inositol phosphate metabolism	12/842	58/4036	0.565513	0.999999	107867978/107870994/107850486/107851080/107870111/107854460/107875799/107867960/107866973/107858484/107870207/107875475	LOC107867978/LOC107870994/LOC107850486/LOC107851080/LOC107870111/LOC107854460/LOC107875799/LOC107867960/LOC107866973/LOC107858484/LOC107870207/LOC107875475	sly:101251739/sly:543809/sly:101253265/sly:101253363/sly:544280/sly:101252196/sly:101262819/sly:101259601/sly:101263310/sly:101251565/sly:101260332/sly:101255702	12	8	107870994/107850486/107870111/107875799/107866973/107858484/107870207/107875475	4	107867978/107851080/107854460/107867960
sly00480	Glutathione metabolism	16/842	78/4036	0.57603	0.999999	107875145/107854335/107861040/107864929/107842864/107861273/107858803/107848053/107845660/107866830/107842862/107854033/107842166/107878539/107852749/107852922	LOC107875145/LOC107854335/LOC107861040/LOC107864929/LOC107842864/LOC107861273/LOC107858803/LOC107848053/LOC107845660/LOC107866830/LOC107842862/LOC107854033/LOC107842166/LOC107878539/LOC107852749/LOC107852922	sly:101268500/sly:101248761/sly:101267923/sly:544197/sly:101266750/sly:101265881/sly:101268216/sly:101249821/sly:101255036/sly:544209/sly:101265571/sly:101267727/sly:101267638/sly:543817/sly:101247915/sly:101266084	16	15	107875145/107854335/107861040/107864929/107842864/107861273/107858803/107848053/107866830/107842862/107854033/107842166/107878539/107852749/107852922	1	107845660
sly04146	Peroxisome	17/842	83/4036	0.578442	0.999999	novel.6665/107840191/107873722/107852418/107864341/107841645/107861682/107842480/107853104/107848464/107850312/107845595/107875640/107860535/107838930/107878690/107851235	-/LOC107840191/LOC107873722/LOC107852418/LOC107864341/LOC107841645/LOC107861682/LOC107842480/LOC107853104/LOC107848464/LOC107850312/LOC107845595/LOC107875640/LOC107860535/LOC107838930/LOC107878690/LOC107851235	sly:101252586/sly:101243643/sly:101250222/sly:101264646/sly:101249020/sly:101259975/sly:101255570/sly:544054/sly:101248304/sly:101255461/sly:543990/sly:100134875/sly:101248207/sly:101255297/sly:101249636/sly:101247444/sly:101256231	17	8	107840191/107861682/107842480/107853104/107848464/107845595/107838930/107851235	9	novel.6665/107873722/107852418/107864341/107841645/107850312/107875640/107860535/107878690
sly00730	Thiamine metabolism	4/842	19/4036	0.582288	0.999999	107859361/107860754/107842524/107850729	LOC107859361/LOC107860754/LOC107842524/LOC107850729	sly:101247277/sly:101246297/sly:101246176/sly:101254478	4	3	107860754/107842524/107850729	1	107859361
sly00280	Valine, leucine and isoleucine degradation	9/842	44/4036	0.586649	0.999999	107857412/107851288/107846976/107871223/107841645/107851037/107873022/107843533/107878013	LOC107857412/LOC107851288/LOC107846976/LOC107871223/LOC107841645/LOC107851037/LOC107873022/LOC107843533/LOC107878013	sly:100134904/sly:101260619/sly:101254485/sly:544237/sly:101259975/sly:101253875/sly:778303/sly:101263543/sly:101267525	9	4	107857412/107851288/107871223/107851037	5	107846976/107841645/107873022/107843533/107878013
sly01210	2-Oxocarboxylic acid metabolism	9/842	44/4036	0.586649	0.999999	107850416/107840659/107851945/107860923/107851037/107871259/107847729/107853330/107876048	LOC107850416/LOC107840659/LOC107851945/LOC107860923/LOC107851037/LOC107871259/LOC107847729/LOC107853330/LOC107876048	sly:101252944/sly:543751/sly:101251907/sly:101246035/sly:101253875/sly:101246533/sly:101265236/sly:101247891/sly:101260239	9	5	107851945/107851037/107871259/107847729/107876048	4	107850416/107840659/107860923/107853330
sly00020	Citrate cycle (TCA cycle)	10/842	50/4036	0.616065	0.999999	107862248/107870847/107867324/107871223/107862877/107864063/107840119/107847937/107842361/107843004	LOC107862248/LOC107870847/LOC107867324/LOC107871223/LOC107862877/LOC107864063/LOC107840119/LOC107847937/LOC107842361/LOC107843004	sly:101258932/sly:101253277/sly:543812/sly:544237/sly:101248181/sly:101265278/sly:778286/sly:101254693/sly:101258530/sly:101246135	10	8	107862248/107870847/107867324/107871223/107862877/107864063/107847937/107843004	2	107840119/107842361
sly00920	Sulfur metabolism	6/842	30/4036	0.618503	0.999999	107859432/107859594/107863678/107878792/107858434/107859485	LOC107859432/LOC107859594/LOC107863678/LOC107878792/LOC107858434/LOC107859485	sly:101259503/sly:544267/sly:100301940/sly:101257583/sly:101257319/sly:101251352	6	5	107859432/107859594/107863678/107878792/107858434	1	107859485
sly04136	Autophagy - other	7/842	36/4036	0.648654	0.999999	novel.1329/107847727/107868309/107867500/107851185/107870434/107854230	-/LOC107847727/LOC107868309/LOC107867500/LOC107851185/LOC107870434/LOC107854230	sly:101244264/sly:544183/sly:101253062/sly:100736469/sly:101265259/sly:101254295/sly:101251393	7	6	novel.1329/107868309/107867500/107851185/107870434/107854230	1	107847727
sly00904	Diterpenoid biosynthesis	4/842	21/4036	0.666374	0.999999	107840383/107852040/107859548/107845864	LOC107840383/LOC107852040/LOC107859548/LOC107845864	sly:100134888/sly:100037505/sly:101263073/sly:101255340	4	4	107840383/107852040/107859548/107845864	0
sly00250	Alanine, aspartate and glutamate metabolism	7/842	37/4036	0.678734	0.999999	107854073/107860923/107870519/107875422/107847729/107838791/107876048	LOC107854073/LOC107860923/LOC107870519/LOC107875422/LOC107847729/LOC107838791/LOC107876048	sly:101258487/sly:101246035/sly:544275/sly:101259343/sly:101265236/sly:101259235/sly:101260239	7	5	107854073/107870519/107847729/107838791/107876048	2	107860923/107875422
sly00062	Fatty acid elongation	6/842	33/4036	0.714576	0.999999	107872813/107864657/107839065/107849942/107845580/107860042	LOC107872813/LOC107864657/LOC107839065/LOC107849942/LOC107845580/LOC107860042	sly:101246151/sly:101262858/sly:101244691/sly:101257933/sly:101268230/sly:101245220	6	3	107872813/107864657/107839065	3	107849942/107845580/107860042
sly00051	Fructose and mannose metabolism	10/842	54/4036	0.716861	0.999999	107840104/107839408/107867663/107861787/107858551/107845858/107870207/107859926/107875763/107870147	LOC107840104/LOC107839408/LOC107867663/LOC107861787/LOC107858551/LOC107845858/LOC107870207/LOC107859926/LOC107875763/LOC107870147	sly:101253137/sly:778245/sly:101266629/sly:543779/sly:101249787/sly:101261972/sly:101260332/sly:101265391/sly:544022/sly:101245938	10	6	107839408/107858551/107870207/107859926/107875763/107870147	4	107840104/107867663/107861787/107845858
sly03420	Nucleotide excision repair	10/842	54/4036	0.716861	0.999999	107863662/107870731/107870635/107847624/107870498/107847917/107855891/107859397/107856319/107873713	LOC107863662/LOC107870731/LOC107870635/LOC107847624/LOC107870498/LOC107847917/LOC107855891/LOC107859397/LOC107856319/LOC107873713	sly:101251406/sly:101259439/sly:101255630/sly:101260506/sly:101265989/sly:101251472/sly:101244966/sly:101244148/sly:101252794/sly:101255497	10	4	107870635/107847624/107855891/107859397	6	107863662/107870731/107870498/107847917/107856319/107873713
sly00564	Glycerophospholipid metabolism	16/842	86/4036	0.738957	0.999999	107878499/107860821/107866274/107854912/107867060/107850570/107866834/107859018/107842944/107855115/107861743/107856750/107850651/107867147/107871044/107868461	LOC107878499/LOC107860821/LOC107866274/LOC107854912/LOC107867060/LOC107850570/LOC107866834/LOC107859018/LOC107842944/LOC107855115/LOC107861743/LOC107856750/LOC107850651/LOC107867147/LOC107871044/LOC107868461	sly:101247838/sly:101261081/sly:544181/sly:101264154/sly:101248193/sly:101255984/sly:101248969/sly:101256870/sly:101243737/sly:101262422/sly:101244067/sly:101267988/sly:101248256/sly:101261812/sly:543901/sly:101259812	16	9	107878499/107860821/107866274/107854912/107867060/107850570/107866834/107855115/107871044	7	107859018/107842944/107861743/107856750/107850651/107867147/107868461
sly03440	Homologous recombination	10/842	55/4036	0.739177	0.999999	107863385/107870731/107870635/novel.1683/107847917/107855891/107856319/107862405/107839898/107862525	LOC107863385/LOC107870731/LOC107870635/-/LOC107847917/LOC107855891/LOC107856319/LOC107862405/LOC107839898/LOC107862525	sly:101252104/sly:101259439/sly:101255630/sly:101253578/sly:101251472/sly:101244966/sly:101252794/sly:101249165/sly:101256033/sly:101253578	10	5	107870635/novel.1683/107855891/107862405/107839898	5	107863385/107870731/107847917/107856319/107862525
sly00071	Fatty acid degradation	8/842	45/4036	0.750902	0.999999	107839143/107842526/107840829/107852418/107864341/107846976/107867453/107873287	LOC107839143/LOC107842526/LOC107840829/LOC107852418/LOC107864341/LOC107846976/LOC107867453/LOC107873287	sly:101261255/sly:101251366/sly:101252984/sly:101264646/sly:101249020/sly:101254485/sly:101244369/sly:101256710	8	2	107839143/107867453	6	107842526/107840829/107852418/107864341/107846976/107873287
sly00670	One carbon pool by folate	3/842	18/4036	0.757858	0.999999	107850886/107839921/107838932	LOC107850886/LOC107839921/LOC107838932	sly:101255258/sly:101250548/sly:101263138	3	2	107850886/107839921	1	107838932
sly00950	Isoquinoline alkaloid biosynthesis	3/842	18/4036	0.757858	0.999999	107845345/107865520/107851006	LOC107845345/LOC107865520/LOC107851006	sly:101264863/sly:101254423/sly:100736464	3	3	107845345/107865520/107851006	0
sly00195	Photosynthesis	9/842	52/4036	0.786669	0.999999	107868483/107839911/107847776/107875659/107873079/107872990/107866833/107859535/107878908	LOC107868483/LOC107839911/LOC107847776/LOC107875659/LOC107873079/LOC107872990/LOC107866833/LOC107859535/LOC107878908	sly:101254454/sly:778301/sly:101259118/sly:101252890/sly:543978/sly:101260830/sly:544053/sly:543931/sly:778297	9	3	107847776/107875659/107872990	6	107868483/107839911/107873079/107866833/107859535/107878908
sly00531	Glycosaminoglycan degradation	2/842	13/4036	0.789064	0.999999	107875231/107843457	LOC107875231/LOC107843457	sly:101244387/sly:100529103	2	0		2	107875231/107843457
sly00905	Brassinosteroid biosynthesis	2/842	13/4036	0.789064	0.999999	107860427/107873297	LOC107860427/LOC107873297	sly:100037489/sly:101255105	2	1	107873297	1	107860427
sly00960	Tropane, piperidine and pyridine alkaloid biosynthesis	4/842	25/4036	0.797489	0.999999	107845345/107867623/107865520/107851006	LOC107845345/LOC107867623/LOC107865520/LOC107851006	sly:101264863/sly:101263402/sly:101254423/sly:100736464	4	4	107845345/107867623/107865520/107851006	0
sly04141	Protein processing in endoplasmic reticulum	32/842	172/4036	0.798315	0.999999	107845380/107844499/107862224/107842861/107878665/107855710/107859097/107875203/107878074/107861257/107875543/107840482/107838718/107875506/107844894/107871975/107839821/107870243/107870215/107864375/107847347/107842196/107878858/107847930/107858767/107851540/107862794/107845984/107843850/107870693/107866771/107875274	LOC107845380/LOC107844499/LOC107862224/LOC107842861/LOC107878665/LOC107855710/LOC107859097/LOC107875203/LOC107878074/LOC107861257/LOC107875543/LOC107840482/LOC107838718/LOC107875506/LOC107844894/LOC107871975/LOC107839821/LOC107870243/LOC107870215/LOC107864375/LOC107847347/LOC107842196/LOC107878858/LOC107847930/LOC107858767/LOC107851540/LOC107862794/LOC107845984/LOC107843850/LOC107870693/LOC107866…	sly:101260872/sly:543798/sly:101243872/sly:101263239/sly:101254012/sly:543902/sly:101247183/sly:101248688/sly:101252901/sly:101256444/sly:100736433/sly:101248524/sly:101250440/sly:543848/sly:101261860/sly:101264183/sly:101254946/sly:101262418/sly:101055596/sly:101254944/sly:101255164/sly:101250189/sly:101264951/sly:101257830/sly:101251912/sly:101244826/sly:101259924/sly:101258019/sly:101255531/sl…	32	17	107845380/107842861/107878665/107875203/107861257/107875543/107840482/107838718/107844894/107839821/107870215/107847347/107842196/107878858/107858767/107845984/107870693	15	107844499/107862224/107855710/107859097/107878074/107875506/107871975/107870243/107864375/107847930/107851540/107862794/107843850/107866771/107875274
sly03040	Spliceosome	28/842	152/4036	0.80289	0.999999	novel.444/107847671/107859716/107870012/107854861/107855025/107860657/107848904/107862579/107863693/107870500/107875543/107843751/107847121/107856849/107870140/107870215/107863914/107838706/107847347/107845610/107842728/107843221/107839826/107870154/107866982/107854276/107839625	-/LOC107847671/LOC107859716/LOC107870012/LOC107854861/LOC107855025/LOC107860657/LOC107848904/LOC107862579/LOC107863693/LOC107870500/LOC107875543/LOC107843751/LOC107847121/LOC107856849/LOC107870140/LOC107870215/LOC107863914/LOC107838706/LOC107847347/LOC107	sly:100134885/sly:101245917/sly:101246043/sly:101256472/sly:101261183/sly:101265451/sly:101254752/sly:101259321/sly:101265421/sly:101261205/sly:101256343/sly:100736433/sly:101252641/sly:101261199/sly:101256011/sly:101268859/sly:101055596/sly:104649355/sly:101267636/sly:101255164/sly:101265967/sly:101258585/sly:101258986/sly:101256129/sly:101247309/sly:101254580/sly:101248804/sly:101257012	28	14	107860657/107848904/107870500/107875543/107856849/107870215/107863914/107838706/107847347/107845610/107842728/107843221/107866982/107839625	14	novel.444/107847671/107859716/107870012/107854861/107855025/107862579/107863693/107843751/107847121/107870140/107839826/107870154/107854276
sly00510	N-Glycan biosynthesis	7/842	42/4036	0.803509	0.999999	107860690/107844499/107844374/107860595/107862794/107866771/107841768	LOC107860690/LOC107844499/LOC107844374/LOC107860595/LOC107862794/LOC107866771/LOC107841768	sly:101260885/sly:543798/sly:101247658/sly:101266287/sly:101259924/sly:101264927/sly:101245516	7	1	107860690	6	107844499/107844374/107860595/107862794/107866771/107841768
sly00410	beta-Alanine metabolism	6/842	37/4036	0.81461	0.999999	107859655/107870798/107865520/107846976/107838791/107878013	LOC107859655/LOC107870798/LOC107865520/LOC107846976/LOC107838791/LOC107878013	sly:101264170/sly:101249640/sly:101254423/sly:101254485/sly:101259235/sly:101267525	6	3	107859655/107865520/107838791	3	107870798/107846976/107878013
sly03410	Base excision repair	6/842	39/4036	0.853113	0.999999	107845534/107870635/107847624/107869420/107857607/107856319	LOC107845534/LOC107870635/LOC107847624/LOC107869420/LOC107857607/LOC107856319	sly:101258999/sly:101255630/sly:101260506/sly:101250399/sly:101255344/sly:101252794	6	5	107845534/107870635/107847624/107869420/107857607	1	107856319
sly00340	Histidine metabolism	2/842	16/4036	0.877008	0.999999	107846976/107851677	LOC107846976/LOC107851677	sly:101254485/sly:101244621	2	1	107851677	1	107846976
sly00061	Fatty acid biosynthesis	5/842	35/4036	0.883251	0.999999	107841760/107852418/107864341/107871444/107873188	LOC107841760/LOC107852418/LOC107864341/LOC107871444/LOC107873188	sly:101245130/sly:101264646/sly:101249020/sly:543869/sly:101246830	5	2	107841760/107873188	3	107852418/107864341/107871444
sly00640	Propanoate metabolism	5/842	35/4036	0.883251	0.999999	107871223/107871444/107867486/107873022/107878013	LOC107871223/LOC107871444/LOC107867486/LOC107873022/LOC107878013	sly:544237/sly:543869/sly:101252012/sly:778303/sly:101267525	5	2	107871223/107867486	3	107871444/107873022/107878013
sly00100	Steroid biosynthesis	4/842	29/4036	0.883567	0.999999	107875519/107839483/107875679/107851175	LOC107875519/LOC107839483/LOC107875679/LOC107851175	sly:100736533/sly:101252433/sly:101256596/sly:100301930	4	3	107875519/107839483/107875679	1	107851175
sly00460	Cyanoamino acid metabolism	4/842	29/4036	0.883567	0.999999	107839921/107860201/107869182/107838932	LOC107839921/LOC107860201/LOC107869182/LOC107838932	sly:101250548/sly:101258424/sly:101255272/sly:101263138	4	1	107839921	3	107860201/107869182/107838932
sly00565	Ether lipid metabolism	3/842	23/4036	0.887302	0.999999	107866274/107866834/107861743	LOC107866274/LOC107866834/LOC107861743	sly:544181/sly:101248969/sly:101244067	3	2	107866274/107866834	1	107861743
sly03018	RNA degradation	15/842	92/4036	0.891116	0.999999	107875683/107838901/novel.3902/107848258/novel.7135/107876019/107875666/107863914/107873423/107843221/107878815/107852802/107854087/novel.2624/107870147	LOC107875683/LOC107838901/-/LOC107848258/-/LOC107876019/LOC107875666/LOC107863914/LOC107873423/LOC107843221/LOC107878815/LOC107852802/LOC107854087/-/LOC107870147	sly:101258270/sly:101245783/sly:101247633/sly:101268737/sly:101253117/sly:101258664/sly:101254498/sly:104649355/sly:101247127/sly:101258986/sly:101250035/sly:101257075/sly:101263933/sly:101263517/sly:101245938	15	8	107875683/107848258/107863914/107843221/107878815/107854087/novel.2624/107870147	7	107838901/novel.3902/novel.7135/107876019/107875666/107873423/107852802
sly03430	Mismatch repair	5/842	36/4036	0.897876	0.999999	107859401/107870731/107870635/107847917/107855891	LOC107859401/LOC107870731/LOC107870635/LOC107847917/LOC107855891	sly:101246010/sly:101259439/sly:101255630/sly:101251472/sly:101244966	5	2	107870635/107855891	3	107859401/107870731/107847917
sly00310	Lysine degradation	4/842	30/4036	0.899332	0.999999	107839916/107846976/107864555/107844042	LOC107839916/LOC107846976/LOC107864555/LOC107844042	sly:101244804/sly:101254485/sly:101267351/sly:101258606	4	0		4	107839916/107846976/107864555/107844042
sly03050	Proteasome	6/842	43/4036	0.910517	0.999999	107878433/107864141/107839083/107879020/107867598/107862405	LOC107878433/LOC107864141/LOC107839083/LOC107879020/LOC107867598/LOC107862405	sly:101247839/sly:101249580/sly:101267619/sly:101266742/sly:101263071/sly:101249165	6	5	107878433/107864141/107839083/107879020/107862405	1	107867598
sly03022	Basal transcription factors	5/842	37/4036	0.910886	0.999999	107863662/107876068/107859397/107845518/107873713	LOC107863662/LOC107876068/LOC107859397/LOC107845518/LOC107873713	sly:101251406/sly:101245068/sly:101244148/sly:101253325/sly:101255497	5	1	107859397	4	107863662/107876068/107845518/107873713
sly03015	mRNA surveillance pathway	18/842	112/4036	0.920287	0.999999	107840365/107847666/107876108/novel.4691/107870500/novel.3449/107870112/107850914/107853425/107866284/107850911/107840594/107870140/107847727/107878168/107863382/107843643/107862553	LOC107840365/LOC107847666/LOC107876108/-/LOC107870500/-/LOC107870112/LOC107850914/LOC107853425/LOC107866284/LOC107850911/LOC107840594/LOC107870140/LOC107847727/LOC107878168/LOC107863382/LOC107843643/LOC107862553	sly:101268042/sly:101251182/sly:101247241/sly:101252047/sly:101256343/sly:101257116/sly:101260528/sly:101260293/sly:101251329/sly:101247106/sly:101251957/sly:101256045/sly:101268859/sly:544183/sly:101246839/sly:101246111/sly:101246003/sly:101252047	18	5	107870500/novel.3449/107853425/107850911/107840594	13	107840365/107847666/107876108/novel.4691/107870112/107850914/107866284/107870140/107847727/107878168/107863382/107843643/107862553
sly03030	DNA replication	6/842	45/4036	0.931102	0.999999	107870731/107870635/107847624/107847917/107855891/107856319	LOC107870731/LOC107870635/LOC107847624/LOC107847917/LOC107855891/LOC107856319	sly:101259439/sly:101255630/sly:101260506/sly:101251472/sly:101244966/sly:101252794	6	3	107870635/107847624/107855891	3	107870731/107847917/107856319
sly00430	Taurine and hypotaurine metabolism	1/842	4036-12-01	0.93992	0.999999	107838791	LOC107838791	sly:101259235	1	1	107838791	0
sly00909	Sesquiterpenoid and triterpenoid biosynthesis	1/842	4036-12-01	0.93992	0.999999	107851783	LOC107851783	sly:101264374	1	1	107851783	0
sly00760	Nicotinate and nicotinamide metabolism	2/842	20/4036	0.942207	0.999999	107874740/107862603	LOC107874740/LOC107862603	sly:101263635/sly:101246910	2	2	107874740/107862603	0
sly03020	RNA polymerase	4/842	36/4036	0.959978	0.999999	novel.126/107858033/107873487/novel.2383	-/LOC107858033/LOC107873487/-	sly:101265201/sly:544278/sly:101259753/sly:778257	4	1	107873487	3	novel.126/107858033/novel.2383
sly00790	Folate biosynthesis	2/842	22/4036	0.960844	0.999999	107840068/107845624	LOC107840068/LOC107845624	sly:544238/sly:100191135	2	1	107840068	1	107845624
sly00450	Selenocompound metabolism	1/842	14/4036	0.962435	0.999999	107863655	LOC107863655	sly:101263926	1	0		1	107863655
sly03013	RNA transport	20/842	132/4036	0.964044	0.999999	107873154/107860098/107853094/107848021/107870500/107855494/107861806/107857627/107871382/107848322/107862820/107862005/107861662/107863091/107870140/107877765/107840862/107845736/107870843/107843509	LOC107873154/LOC107860098/LOC107853094/LOC107848021/LOC107870500/LOC107855494/LOC107861806/LOC107857627/LOC107871382/LOC107848322/LOC107862820/LOC107862005/LOC107861662/LOC107863091/LOC107870140/LOC107877765/LOC107840862/LOC107845736/LOC107870843/LOC107843509	sly:101245551/sly:101262974/sly:101248882/sly:101247869/sly:101256343/sly:101263957/sly:101258447/sly:101261276/sly:101268762/sly:101250741/sly:101265714/sly:101266921/sly:101251762/sly:101263498/sly:101268859/sly:101246938/sly:101265205/sly:101247963/sly:101261101/sly:101253491	20	5	107848021/107870500/107857627/107845736/107843509	15	107873154/107860098/107853094/107855494/107861806/107871382/107848322/107862820/107862005/107861662/107863091/107870140/107877765/107840862/107870843
sly00240	Pyrimidine metabolism	6/842	50/4036	0.965388	0.999999	107844226/107850302/107875422/107868716/107875281/107847867	LOC107844226/LOC107850302/LOC107875422/LOC107868716/LOC107875281/LOC107847867	sly:101243930/sly:101252471/sly:101259343/sly:101259471/sly:101255711/sly:101244927	6	3	107844226/107868716/107847867	3	107850302/107875422/107875281
sly00230	Purine metabolism	11/842	82/4036	0.970559	0.999999	107861661/107860754/107850729/107864665/107843100/107850302/107868058/107859270/107852502/107867403/107843171	LOC107861661/LOC107860754/LOC107850729/LOC107864665/LOC107843100/LOC107850302/LOC107868058/LOC107859270/LOC107852502/LOC107867403/LOC107843171	sly:101251456/sly:101246297/sly:101254478/sly:101261160/sly:101244800/sly:101252471/sly:101264119/sly:101268249/sly:101246417/sly:101267885/sly:101248036	11	7	107861661/107860754/107850729/107843100/107852502/107867403/107843171	4	107864665/107850302/107868058/107859270
sly00970	Aminoacyl-tRNA biosynthesis	6/842	52/4036	0.974048	0.999999	107860455/107858954/107877813/107858183/novel.2727/107839766	LOC107860455/LOC107858954/LOC107877813/LOC107858183/-/LOC107839766	sly:101256769/sly:101260692/sly:101255211/sly:543755/sly:101247918/sly:101244420	6	1	novel.2727	5	107860455/107858954/107877813/107858183/107839766
sly03060	Protein export	4/842	39/4036	0.975439	0.999999	107852052/107839416/107840647/107841033	LOC107852052/LOC107839416/LOC107840647/LOC107841033	sly:544156/sly:101261162/sly:101250048/sly:101250277	4	2	107852052/107839416	2	107840647/107841033
sly01040	Biosynthesis of unsaturated fatty acids	1/842	17/4036	0.981437	0.999999	107873188	LOC107873188	sly:101246830	1	1	107873188	0
sly01212	Fatty acid metabolism	7/842	63/4036	0.986477	0.999999	107839143/novel.6463/107841760/107852418/107864341/107871444/107873188	LOC107839143/-/LOC107841760/LOC107852418/LOC107864341/LOC107871444/LOC107873188	sly:101261255/sly:101260474/sly:101245130/sly:101264646/sly:101249020/sly:543869/sly:101246830	7	3	107839143/107841760/107873188	4	novel.6463/107852418/107864341/107871444
sly00196	Photosynthesis - antenna proteins	1/842	19/4036	0.988401	0.999999	107845349	LOC107845349	sly:101253628	1	0		1	107845349
sly03010	Ribosome	20/842	212/4036	0.999998	0.999999	107864968/107864214/107875740/107842126/107845404/107870999/107876878/107855577/107873563/107840947/107848249/107872788/novel.2468/107843747/107875580/107877883/107860884/107856053/107879536/107857105	LOC107864968/LOC107864214/LOC107875740/LOC107842126/LOC107845404/LOC107870999/LOC107876878/LOC107855577/LOC107873563/LOC107840947/LOC107848249/LOC107872788/-/LOC107843747/LOC107875580/LOC107877883/LOC107860884/LOC107856053/LOC107879536/LOC107857105	sly:101244648/sly:101258785/sly:101256335/sly:101260624/sly:101261433/sly:101258992/sly:101254712/sly:101263198/sly:101250510/sly:101264703/sly:101262888/sly:101250811/sly:101254078/sly:101259299/sly:101259021/sly:101246068/sly:101247992/sly:544291/sly:101247851/sly:101264827	20	10	107864214/107845404/107840947/107848249/novel.2468/107875580/107877883/107860884/107856053/107857105	10	107864968/107875740/107842126/107870999/107876878/107855577/107873563/107872788/107843747/107879536
sly03008	Ribosome biogenesis in eukaryotes	2/842	72/4036	0.999999	0.999999	107847664/novel.877	LOC107847664/-	sly:101258526/sly:101258943	2	0		2	107847664/novel.877

## Sheet: cp12vscc0_KEGGenrich
KEGGID	Description	GeneRatio	BgRatio	pvalue	padj	geneID	geneName	keggID	Count	Up	Up_Gene_names	Down	Down_Gene_names
sly04016	MAPK signaling pathway - plant	70/1660	131/4052	0.00228586	0.117676	107862088/107860522/107872867/107873437/107842605/107843441/107840204/107864513/107843743/107866619/107878318/107840074/107870881/107840155/107839265/107850747/107852145/107861622/107869622/107870958/107849571/107878300/107855770/107872955/107864242/107861707/107872884/107839975/107840920/107850689/107862854/107877952/107849967/107866338/107855296/107850312/107877224/107840321/107852411/107859787…	LOC107862088/LOC107860522/LOC107872867/LOC107873437/LOC107842605/LOC107843441/LOC107840204/LOC107864513/LOC107843743/LOC107866619/LOC107878318/LOC107840074/LOC107870881/LOC107840155/LOC107839265/LOC107850747/LOC107852145/LOC107861622/LOC107869622/LOC107870958/LOC107849571/LOC107878300/LOC107855770/LOC107872955/LOC107864242/LOC107861707/LOC107872884/LOC107839975/LOC107840920/LOC107850689/LOC107862…	sly:543603/sly:101251639/sly:101255501/sly:543880/sly:101268787/sly:101250944/sly:101262346/sly:101246650/sly:544131/sly:543712/sly:101267358/sly:101245298/sly:544165/sly:100191111/sly:101261749/sly:101261048/sly:101245784/sly:543946/sly:104647127/sly:606712/sly:101244245/sly:101264342/sly:101263667/sly:101249467/sly:543571/sly:100316894/sly:101267127/sly:101263165/sly:543720/sly:543589/sly:54394…	70	55	107862088/107860522/107872867/107873437/107842605/107843441/107840204/107864513/107843743/107866619/107878318/107840074/107870881/107840155/107839265/107850747/107852145/107861622/107869622/107870958/107849571/107878300/107855770/107872955/107864242/107839975/107840920/107850689/107862854/107849967/107866338/107877224/107843193/107860330/107871198/107851395/107858934/107845803/107855207/107858897…	15	107861707/107872884/107877952/107855296/107850312/107840321/107852411/107859787/107840981/107875997/107844095/107850532/107862748/107864851/107839952
sly04626	Plant-pathogen interaction	78/1660	149/4052	0.00278772	0.117676	107862088/107860522/107872867/107842605/107860115/107850672/107845825/107877796/107874660/107843743/107872603/107868186/107859878/107843864/107840074/107843851/107878173/107875343/107840155/107839265/107877607/107852145/107861622/107878300/107855368/107860951/107855770/107864242/107863939/107839975/107868306/107850465/107859623/107855966/107854436/107855710/107871975/107861198/107872239/107845709…	LOC107862088/LOC107860522/LOC107872867/LOC107842605/LOC107860115/LOC107850672/LOC107845825/LOC107877796/LOC107874660/LOC107843743/LOC107872603/LOC107868186/LOC107859878/LOC107843864/LOC107840074/LOC107843851/LOC107878173/LOC107875343/LOC107840155/LOC107839265/LOC107877607/LOC107852145/LOC107861622/LOC107878300/LOC107855368/LOC107860951/LOC107855770/LOC107864242/LOC107863939/LOC107839975/LOC107868…	sly:543603/sly:101251639/sly:101255501/sly:101268787/sly:101256237/sly:101256827/sly:101256817/sly:101250219/sly:101265138/sly:544131/sly:544041/sly:100316879/sly:101260391/sly:101249692/sly:101245298/sly:101266882/sly:100736514/sly:101249560/sly:100191111/sly:101261749/sly:543900/sly:101245784/sly:543946/sly:101264342/sly:101253387/sly:101252553/sly:101263667/sly:543571/sly:101252935/sly:1012631…	78	65	107862088/107860522/107872867/107842605/107860115/107850672/107845825/107877796/107874660/107843743/107872603/107868186/107859878/107843864/107840074/107843851/107878173/107875343/107840155/107839265/107877607/107852145/107861622/107878300/107855368/107860951/107855770/107864242/107863939/107839975/107868306/107859623/107855966/107854436/107861198/107872239/107845709/107875924/107840869/novel.708…	13	107850465/107855710/107871975/107847506/107840981/107875997/107844095/107847903/107863453/107868062/107851076/107860627/107869296
sly00900	Terpenoid backbone biosynthesis	28/1660	45/4052	0.00309674	0.117676	107857412/107857663/107866243/107850997/107863738/107878086/107859749/107850768/107862389/107872939/107839547/107856323/107872863/107854680/107851288/107875743/107850614/107868268/107867046/107847536/107862250/107852315/107875745/107878554/107870097/107851334/107870481/107869556	LOC107857412/LOC107857663/LOC107866243/LOC107850997/LOC107863738/LOC107878086/LOC107859749/LOC107850768/LOC107862389/LOC107872939/LOC107839547/LOC107856323/LOC107872863/LOC107854680/LOC107851288/LOC107875743/LOC107850614/LOC107868268/LOC107867046/LOC107847536/LOC107862250/LOC107852315/LOC107875745/LOC107878554/LOC107870097/LOC107851334/LOC107870481/LOC107869556	sly:100134904/sly:101265292/sly:101249394/sly:100134900/sly:543552/sly:101262830/sly:543702/sly:101251053/sly:543682/sly:101250227/sly:101261961/sly:101266434/sly:101256682/sly:100037490/sly:101260619/sly:544036/sly:101250000/sly:101266490/sly:778360/sly:543704/sly:101262299/sly:544220/sly:543658/sly:101253007/sly:101256172/sly:101252619/sly:778310/sly:101252616	28	20	107857412/107857663/107866243/107850997/107863738/107878086/107859749/107850768/107862389/107872939/107839547/107856323/107872863/107851288/107868268/107867046/107847536/107875745/107878554/107870481	8	107854680/107875743/107850614/107862250/107852315/107870097/107851334/107869556
sly04075	Plant hormone signal transduction	101/1660	204/4052	0.00699321	0.141075	107840891/107861681/107843441/107861852/107870506/107866619/107877900/107868079/107840207/107862455/107870881/107857547/novel.6090/107840155/107850747/107859144/107877442/107861622/107850490/107870958/107864637/107843874/107861707/107878124/107872884/107861786/novel.5097/107863934/107848541/107848380/107839829/107850689/107859326/107846008/107877952/107861318/107863499/107849967/107860970/1078668…	LOC107840891/LOC107861681/LOC107843441/LOC107861852/LOC107870506/LOC107866619/LOC107877900/LOC107868079/LOC107840207/LOC107862455/LOC107870881/LOC107857547/-/LOC107840155/LOC107850747/LOC107859144/LOC107877442/LOC107861622/LOC107850490/LOC107870958/LOC107864637/LOC107843874/LOC107861707/LOC107878124/LOC107872884/LOC107861786/-/LOC107863934/LOC107848541/LOC107848380/LOC107839829/LOC107850689/LOC10…	sly:100134911/sly:100301927/sly:101250944/sly:101055548/sly:543601/sly:543712/sly:101247936/sly:101267832/sly:101246970/sly:101260711/sly:544165/sly:101260897/sly:101263158/sly:100191111/sly:101261048/sly:101265701/sly:101255313/sly:543946/sly:101261320/sly:606712/sly:101055541/sly:101248058/sly:100316894/sly:101255900/sly:101267127/sly:101055552/sly:543600/sly:100736493/sly:101247526/sly:1012442…	101	65	107840891/107861681/107843441/107861852/107870506/107866619/107877900/107868079/107840207/107862455/107870881/novel.6090/107840155/107850747/107859144/107877442/107861622/107870958/107864637/107878124/107861786/novel.5097/107863934/107848541/107839829/107850689/107859326/107846008/107861318/107849967/107860970/107866338/107869396/107867043/107862213/107874961/107843193/107860330/107871198/1078745…	36	107857547/107850490/107843874/107861707/107872884/107848380/107877952/107863499/107866817/107861654/107842089/107840321/107867155/107873705/107878423/107839517/107852411/107861842/107867146/107870546/107875243/107877103/107847535/107877747/107877307/107844597/107859475/107880026/107872843/107843103/107867653/107843865/107873139/107843885/107859256/107871774
sly00510	N-Glycan biosynthesis	25/1660	41/4052	0.00741458	0.141075	107860690/107859093/107878105/107844499/107870753/107860595/107844374/107866798/107870013/107866771/107840392/107878608/107862794/107862527/107860855/107844012/107861598/107842996/107841768/107866840/107850697/107840984/107877746/107870992/107868288	LOC107860690/LOC107859093/LOC107878105/LOC107844499/LOC107870753/LOC107860595/LOC107844374/LOC107866798/LOC107870013/LOC107866771/LOC107840392/LOC107878608/LOC107862794/LOC107862527/LOC107860855/LOC107844012/LOC107861598/LOC107842996/LOC107841768/LOC107866840/LOC107850697/LOC107840984/LOC107877746/LOC107870992/LOC107868288	sly:101260885/sly:101246787/sly:101259650/sly:543798/sly:101268683/sly:101266287/sly:101247658/sly:101257856/sly:101256171/sly:101264927/sly:101245405/sly:101267427/sly:101259924/sly:101250940/sly:101244457/sly:101244134/sly:101264908/sly:101252805/sly:101245516/sly:101267114/sly:101264537/sly:101256652/sly:101244199/sly:101261146/sly:101256748	25	7	107860690/107859093/107878105/107870753/107862527/107861598/107842996	18	107844499/107860595/107844374/107866798/107870013/107866771/107840392/107878608/107862794/107860855/107844012/107841768/107866840/107850697/107840984/107877746/107870992/107868288
sly00330	Arginine and proline metabolism	27/1660	45/4052	0.00742499	0.141075	107859655/107858653/107840486/107843343/107855493/107847415/107855970/107866830/107873263/107860213/107874980/107845928/107847831/107847565/107863265/107858795/107863453/107870798/107841896/107846976/107858632/107839125/107878424/107868214/107838979/107851501/107853213	LOC107859655/LOC107858653/LOC107840486/LOC107843343/LOC107855493/LOC107847415/LOC107855970/LOC107866830/LOC107873263/LOC107860213/LOC107874980/LOC107845928/LOC107847831/LOC107847565/LOC107863265/LOC107858795/LOC107863453/LOC107870798/LOC107841896/LOC107846976/LOC107858632/LOC107839125/LOC107878424/LOC107868214/LOC107838979/LOC107851501/LOC107853213	sly:101264170/sly:101253022/sly:543960/sly:104644402/sly:101268445/sly:100134880/sly:543894/sly:544209/sly:101244293/sly:101254254/sly:101262822/sly:101264873/sly:544177/sly:101255659/sly:101255367/sly:101262682/sly:778272/sly:101249640/sly:101260014/sly:101254485/sly:101244153/sly:101260072/sly:101244094/sly:101267095/sly:544281/sly:101245118/sly:101244118	27	12	107859655/107858653/107840486/107855493/107847415/107855970/107866830/107873263/107860213/107847831/107839125/107838979	15	107843343/107874980/107845928/107847565/107863265/107858795/107863453/107870798/107841896/107846976/107858632/107878424/107868214/107851501/107853213
sly00860	Porphyrin and chlorophyll metabolism	25/1660	43/4052	0.0166635	0.25712	107838934/107870073/107840071/107856090/107856759/107844048/107866321/107863035/107876758/107878895/107845435/107862118/107845383/107868496/107847505/107855028/107862250/107864536/107842746/107838960/107877925/107860669/107842007/107875768/107851663	LOC107838934/LOC107870073/LOC107840071/LOC107856090/LOC107856759/LOC107844048/LOC107866321/LOC107863035/LOC107876758/LOC107878895/LOC107845435/LOC107862118/LOC107845383/LOC107868496/LOC107847505/LOC107855028/LOC107862250/LOC107864536/LOC107842746/LOC107838960/LOC107877925/LOC107860669/LOC107842007/LOC107875768/LOC107851663	sly:101248153/sly:101244176/sly:101259974/sly:101246744/sly:101261158/sly:101257518/sly:778212/sly:543967/sly:101265146/sly:101257684/sly:101244717/sly:101267302/sly:101255435/sly:101251358/sly:543677/sly:543647/sly:101262299/sly:101248918/sly:101247061/sly:101247221/sly:101258872/sly:101257032/sly:101248079/sly:101250511/sly:101268533	25	7	107838934/107856759/107866321/107864536/107838960/107877925/107860669	18	107870073/107840071/107856090/107844048/107863035/107876758/107878895/107845435/107862118/107845383/107868496/107847505/107855028/107862250/107842746/107842007/107875768/107851663
sly00750	Vitamin B6 metabolism	9/1660	4052-12-01	0.0180435	0.25712	107858266/107875470/107862447/107861704/107863057/107878197/107860107/107853207/107862446	LOC107858266/LOC107875470/LOC107862447/LOC107861704/LOC107863057/LOC107878197/LOC107860107/LOC107853207/LOC107862446	sly:101254553/sly:101257782/sly:101259228/sly:101260521/sly:101244752/sly:544179/sly:101259693/sly:101251664/sly:101258934	9	3	107858266/107875470/107862446	6	107862447/107861704/107863057/107878197/107860107/107853207
sly00360	Phenylalanine metabolism	26/1660	49/4052	0.0573903	0.715894	107860278/107875407/107854291/107862076/107843092/107865520/107879725/107843343/107845345/107848444/107851006/107875995/107851104/107845928/107879181/107869755/107847565/107840262/107847449/107845032/107853336/107839125/107878424/107870882/107847568/107848433	LOC107860278/LOC107875407/LOC107854291/LOC107862076/LOC107843092/LOC107865520/LOC107879725/LOC107843343/LOC107845345/LOC107848444/LOC107851006/LOC107875995/LOC107851104/LOC107845928/LOC107879181/LOC107869755/LOC107847565/LOC107840262/LOC107847449/LOC107845032/LOC107853336/LOC107839125/LOC107878424/LOC107870882/LOC107847568/LOC107848433	sly:101265690/sly:101244196/sly:101243656/sly:101249624/sly:101243922/sly:101254423/sly:778254/sly:104644402/sly:101264863/sly:778256/sly:100736464/sly:101248210/sly:101260030/sly:101264873/sly:101263745/sly:101255909/sly:101255659/sly:101260278/sly:101266123/sly:101248029/sly:101252173/sly:101260072/sly:101244094/sly:101257377/sly:101249706/sly:101249664	26	20	107860278/107875407/107854291/107862076/107843092/107865520/107879725/107845345/107848444/107851006/107875995/107851104/107869755/107840262/107847449/107845032/107853336/107839125/107870882/107848433	6	107843343/107845928/107879181/107847565/107878424/107847568
sly00710	Carbon fixation in photosynthetic organisms	35/1660	69/4052	0.0627977	0.715894	107848158/107862248/107845282/107867324/107860923/107870788/107877699/107851146/107864539/107840119/107845307/107840104/107845928/107847755/107871105/107870207/107864181/107847729/107850239/107861641/107858551/107842361/107869777/107878882/107870592/107839125/107858580/107878424/107878622/107843644/107870777/107878843/107861795/107862261/107842003	LOC107848158/LOC107862248/LOC107845282/LOC107867324/LOC107860923/LOC107870788/LOC107877699/LOC107851146/LOC107864539/LOC107840119/LOC107845307/LOC107840104/LOC107845928/LOC107847755/LOC107871105/LOC107870207/LOC107864181/LOC107847729/LOC107850239/LOC107861641/LOC107858551/LOC107842361/LOC107869777/LOC107878882/LOC107870592/LOC107839125/LOC107858580/LOC107878424/LOC107878622/LOC107843644/LOC107870…	sly:101260137/sly:101258932/sly:101256813/sly:543812/sly:101246035/sly:101248407/sly:101253541/sly:101249445/sly:101248141/sly:778286/sly:101261166/sly:101253137/sly:101264873/sly:101249193/sly:100316873/sly:101260332/sly:101253131/sly:101265236/sly:543805/sly:101246328/sly:101249787/sly:101258530/sly:101255322/sly:101254111/sly:101265735/sly:101260072/sly:543974/sly:101244094/sly:778285/sly:1012…	35	17	107848158/107862248/107845282/107867324/107845307/107847755/107870207/107847729/107861641/107858551/107870592/107839125/107858580/107878622/107870777/107861795/107842003	18	107860923/107870788/107877699/107851146/107864539/107840119/107840104/107845928/107871105/107864181/107850239/107842361/107869777/107878882/107878424/107843644/107878843/107862261
sly03040	Spliceosome	72/1660	154/4052	0.080562	0.72731	107848909/107875543/107860657/novel.444/107870140/107848904/107840517/107840813/107838706/107847671/107870500/107863039/107870421/107863693/107864215/107870154/107870012/107851854/107859716/107847383/107856849/107850705/107844696/107855025/107854276/107839826/107845552/107843751/107843339/107859021/107842728/107845610/107864033/107867788/107862291/107846569/107859949/107847326/107871345/107875708…	LOC107848909/LOC107875543/LOC107860657/-/LOC107870140/LOC107848904/LOC107840517/LOC107840813/LOC107838706/LOC107847671/LOC107870500/LOC107863039/LOC107870421/LOC107863693/LOC107864215/LOC107870154/LOC107870012/LOC107851854/LOC107859716/LOC107847383/LOC107856849/LOC107850705/LOC107844696/LOC107855025/LOC107854276/LOC107839826/LOC107845552/LOC107843751/LOC107843339/LOC107859021/LOC107842728/LOC1078…	sly:101253638/sly:100736433/sly:101254752/sly:100134885/sly:101268859/sly:101259321/sly:101267328/sly:101247104/sly:101267636/sly:101245917/sly:101256343/sly:101263601/sly:101250296/sly:101261205/sly:101258490/sly:101247309/sly:101256472/sly:101253458/sly:101246043/sly:101253282/sly:101256011/sly:101265498/sly:101262575/sly:101265451/sly:101248804/sly:101256129/sly:101266564/sly:101252641/sly:101…	72	36	107848909/107875543/107860657/107848904/107840517/107838706/107870500/107870421/107864215/107851854/107856849/107850705/107844696/107843339/107842728/107845610/107864033/107867788/107862291/107847326/107871345/107869995/107843146/107863009/107858861/107859405/107863914/107860556/107872847/107863339/107839656/107858458/novel.5579/107866982/107875846/107878503	36	novel.444/107870140/107840813/107847671/107863039/107863693/107870154/107870012/107859716/107847383/107855025/107854276/107839826/107845552/107843751/107859021/107846569/107859949/107875708/107843117/107843631/107873704/107854861/107864026/novel.952/107858560/107839862/107839163/107842067/107862923/107842520/107847121/107857061/107858504/107876648/107867565
sly00561	Glycerolipid metabolism	34/1660	68/4052	0.0810706	0.72731	107870261/107878499/107877723/107862846/107872293/107855115/107856742/107865980/107867060/107861698/107845447/107871044/107871471/107874980/107839197/107856750/107873305/107842773/107875629/107875831/107857043/107845532/107846976/107878357/107838884/107857605/107843908/107848737/107842762/107864034/107842839/107840924/107877877/107843925	LOC107870261/LOC107878499/LOC107877723/LOC107862846/LOC107872293/LOC107855115/LOC107856742/LOC107865980/LOC107867060/LOC107861698/LOC107845447/LOC107871044/LOC107871471/LOC107874980/LOC107839197/LOC107856750/LOC107873305/LOC107842773/LOC107875629/LOC107875831/LOC107857043/LOC107845532/LOC107846976/LOC107878357/LOC107838884/LOC107857605/LOC107843908/LOC107848737/LOC107842762/LOC107864034/LOC107842…	sly:101266812/sly:101247838/sly:101259856/sly:101249534/sly:101257357/sly:101262422/sly:101268277/sly:101246167/sly:101248193/sly:101259322/sly:101250748/sly:543901/sly:101255399/sly:101262822/sly:101254424/sly:101267988/sly:101257269/sly:101252422/sly:101261928/sly:544126/sly:101262782/sly:101248625/sly:101254485/sly:778260/sly:100301938/sly:101253668/sly:101255254/sly:101246362/sly:101251501/sl…	34	15	107870261/107878499/107877723/107862846/107872293/107855115/107867060/107861698/107845447/107871044/107848737/107842762/107864034/107842839/107877877	19	107856742/107865980/107871471/107874980/107839197/107856750/107873305/107842773/107875629/107875831/107857043/107845532/107846976/107878357/107838884/107857605/107843908/107840924/107843925
sly00410	beta-Alanine metabolism	19/1660	36/4052	0.101535	0.72731	107859655/107858653/107865520/107838791/107855970/107857656/107850578/107874980/107879181/107847831/107847449/107870798/107841896/107843407/107846976/107842329/107852152/107879455/107847669	LOC107859655/LOC107858653/LOC107865520/LOC107838791/LOC107855970/LOC107857656/LOC107850578/LOC107874980/LOC107879181/LOC107847831/LOC107847449/LOC107870798/LOC107841896/LOC107843407/LOC107846976/LOC107842329/LOC107852152/LOC107879455/LOC107847669	sly:101264170/sly:101253022/sly:101254423/sly:101259235/sly:543894/sly:101255253/sly:100147722/sly:101262822/sly:101263745/sly:544177/sly:101266123/sly:101249640/sly:101260014/sly:101248347/sly:101254485/sly:101263879/sly:101267567/sly:101268723/sly:101261880	19	12	107859655/107858653/107865520/107838791/107855970/107857656/107850578/107847831/107847449/107843407/107852152/107847669	7	107874980/107879181/107870798/107841896/107846976/107842329/107879455
sly03013	RNA transport	62/1660	133/4052	0.104741	0.72731	107850889/107872972/107866023/107870140/107861806/107870500/107864405/107862820/107862005/107864428/107848021/107863091/107850542/107870406/107843339/107859377/107850513/107838858/107873154/107840876/107863955/107846569/107861884/107839779/107874054/107846383/107839969/107848322/107839777/107858342/107845540/107861662/107871382/107870843/107853094/107873424/107852527/107847735/107845736/107850954…	LOC107850889/LOC107872972/LOC107866023/LOC107870140/LOC107861806/LOC107870500/LOC107864405/LOC107862820/LOC107862005/LOC107864428/LOC107848021/LOC107863091/LOC107850542/LOC107870406/LOC107843339/LOC107859377/LOC107850513/LOC107838858/LOC107873154/LOC107840876/LOC107863955/LOC107846569/LOC107861884/LOC107839779/LOC107874054/LOC107846383/LOC107839969/LOC107848322/LOC107839777/LOC107858342/LOC107845…	sly:101253905/sly:101244374/sly:101247351/sly:101268859/sly:101258447/sly:101256343/sly:101253626/sly:101265714/sly:101266921/sly:101259786/sly:101247869/sly:101263498/sly:101260210/sly:101256791/sly:101262878/sly:101252350/sly:101261596/sly:101252510/sly:101245551/sly:101248044/sly:101244048/sly:101259772/sly:101253366/sly:101248584/sly:101249952/sly:101245721/sly:101261756/sly:101250741/sly:101…	62	25	107850889/107872972/107866023/107870500/107864405/107848021/107850542/107843339/107874054/107846383/107839777/107858342/107845540/107847735/107845736/107850954/107861846/107860556/107872847/107868902/107843509/107850924/107857627/107847405/107840754	37	107870140/107861806/107862820/107862005/107864428/107863091/107870406/107859377/107850513/107838858/107873154/107840876/107863955/107846569/107861884/107839779/107839969/107848322/107861662/107871382/107870843/107853094/107873424/107852527/107844414/107842644/107863603/107850315/107868097/107843854/107860098/107843054/107851222/107867565/107877414/107862504/107875576
sly00906	Carotenoid biosynthesis	17/1660	32/4052	0.11123	0.72731	107852027/107850059/107868281/107867833/107846808/107870081/107870293/107843894/107854906/107851558/107863219/107855068/107850430/107850957/107839468/107845318/107844820	LOC107852027/LOC107850059/LOC107868281/LOC107867833/LOC107846808/LOC107870081/LOC107870293/LOC107843894/LOC107854906/LOC107851558/LOC107863219/LOC107855068/LOC107850430/LOC107850957/LOC107839468/LOC107845318/LOC107844820	sly:544163/sly:101249565/sly:543988/sly:100136887/sly:100316877/sly:101250535/sly:101254720/sly:101267662/sly:543651/sly:101267857/sly:544297/sly:101254297/sly:543696/sly:100322875/sly:543629/sly:101256252/sly:100313501	17	10	107852027/107850059/107868281/107846808/107870293/107854906/107863219/107855068/107850430/107850957	7	107867833/107870081/107843894/107851558/107839468/107845318/107844820
sly00270	Cysteine and methionine metabolism	39/1660	81/4052	0.112962	0.72731	107862248/107864513/107850602/107853805/107845345/107847415/107878792/107840630/107855970/107839203/107861847/107867486/107865075/107843129/107864539/107840119/107842189/107854610/107851104/107878799/107845928/107847831/107863678/107840524/107851099/107838765/107840956/107861366/107864181/107839536/107842361/107878883/107857536/107839125/107878424/107878622/107863655/107838766/107875564	LOC107862248/LOC107864513/LOC107850602/LOC107853805/LOC107845345/LOC107847415/LOC107878792/LOC107840630/LOC107855970/LOC107839203/LOC107861847/LOC107867486/LOC107865075/LOC107843129/LOC107864539/LOC107840119/LOC107842189/LOC107854610/LOC107851104/LOC107878799/LOC107845928/LOC107847831/LOC107863678/LOC107840524/LOC107851099/LOC107838765/LOC107840956/LOC107861366/LOC107864181/LOC107839536/LOC107842…	sly:101258932/sly:101246650/sly:101247506/sly:544052/sly:101264863/sly:100134880/sly:101257583/sly:101258894/sly:543894/sly:101255033/sly:101244469/sly:101252012/sly:543536/sly:544302/sly:101248141/sly:778286/sly:101251255/sly:101248518/sly:101260030/sly:101253301/sly:101264873/sly:544177/sly:100301940/sly:101256428/sly:543721/sly:101258686/sly:101266998/sly:778292/sly:101253131/sly:543537/sly:10…	39	25	107862248/107864513/107850602/107853805/107845345/107847415/107878792/107855970/107861847/107867486/107865075/107843129/107842189/107854610/107851104/107847831/107863678/107851099/107861366/107839536/107857536/107839125/107878622/107863655/107875564	14	107840630/107839203/107864539/107840119/107878799/107845928/107840524/107838765/107840956/107864181/107842361/107878883/107878424/107838766
sly00310	Lysine degradation	16/1660	30/4052	0.116452	0.72731	107878086/107864555/107864095/107839916/107878272/107874980/107849051/107852488/107879181/107846976/107840794/107870097/novel.511/107853169/107850520/107872914	LOC107878086/LOC107864555/LOC107864095/LOC107839916/LOC107878272/LOC107874980/LOC107849051/LOC107852488/LOC107879181/LOC107846976/LOC107840794/LOC107870097/-/LOC107853169/LOC107850520/LOC107872914	sly:101262830/sly:101267351/sly:101243931/sly:101244804/sly:101244888/sly:101262822/sly:101265751/sly:101245641/sly:101263745/sly:101254485/sly:100134891/sly:101256172/sly:101245641/sly:101268173/sly:101268081/sly:101247436	16	4	107878086/107878272/107852488/107850520	12	107864555/107864095/107839916/107874980/107849051/107879181/107846976/107840794/107870097/novel.511/107853169/107872914
sly00220	Arginine biosynthesis	15/1660	28/4052	0.12194	0.72731	107840659/107860923/107865960/107870519/107845928/107847729/107868013/107848022/107863453/107861641/107840325/107860178/107870684/107839125/107878424	LOC107840659/LOC107860923/LOC107865960/LOC107870519/LOC107845928/LOC107847729/LOC107868013/LOC107848022/LOC107863453/LOC107861641/LOC107840325/LOC107860178/LOC107870684/LOC107839125/LOC107878424	sly:543751/sly:101246035/sly:101245573/sly:544275/sly:101264873/sly:101265236/sly:100301981/sly:101267891/sly:778272/sly:101246328/sly:101252029/sly:101264475/sly:101267549/sly:101260072/sly:101244094	15	10	107865960/107870519/107847729/107868013/107848022/107861641/107840325/107860178/107870684/107839125	5	107840659/107860923/107845928/107863453/107878424
sly04712	Circadian rhythm - plant	20/1660	39/4052	0.124995	0.72731	107845418/107862999/107850670/107842184/107855298/107850365/107863034/107862265/107867504/107838759/107838859/107871256/107870660/107843364/107845420/107854359/107878104/107870943/107860209/107850642	LOC107845418/LOC107862999/LOC107850670/LOC107842184/LOC107855298/LOC107850365/LOC107863034/LOC107862265/LOC107867504/LOC107838759/LOC107838859/LOC107871256/LOC107870660/LOC107843364/LOC107845420/LOC107854359/LOC107878104/LOC107870943/LOC107860209/LOC107850642	sly:101262866/sly:101250283/sly:101249698/sly:543547/sly:101263834/sly:101258346/sly:100736457/sly:101259425/sly:544219/sly:101256908/sly:543733/sly:778295/sly:101255788/sly:101249224/sly:544176/sly:101265040/sly:101259349/sly:101245655/sly:101256338/sly:101268174	20	13	107845418/107862999/107850670/107842184/107855298/107850365/107862265/107838759/107838859/107871256/107870660/107878104/107860209	7	107863034/107867504/107843364/107845420/107854359/107870943/107850642
sly00650	Butanoate metabolism	12/1660	22/4052	0.140102	0.72731	107857412/107866243/107878086/107838791/107878547/107850416/107850578/107879181/107851288/107841645/107864249/107870097	LOC107857412/LOC107866243/LOC107878086/LOC107838791/LOC107878547/LOC107850416/LOC107850578/LOC107879181/LOC107851288/LOC107841645/LOC107864249/LOC107870097	sly:100134904/sly:101249394/sly:101262830/sly:101259235/sly:101253806/sly:101252944/sly:100147722/sly:101263745/sly:101260619/sly:101259975/sly:100147726/sly:101256172	12	7	107857412/107866243/107878086/107838791/107878547/107850578/107851288	5	107850416/107879181/107841645/107864249/107870097
sly00071	Fatty acid degradation	22/1660	44/4052	0.142313	0.72731	107839143/107878086/107854884/107847268/107873287/107855307/107842526/107874980/107840916/107850556/107879181/107840829/107852418/107848605/107863444/107846976/107870097/107868016/107850447/107864341/107867684/107845290	LOC107839143/LOC107878086/LOC107854884/LOC107847268/LOC107873287/LOC107855307/LOC107842526/LOC107874980/LOC107840916/LOC107850556/LOC107879181/LOC107840829/LOC107852418/LOC107848605/LOC107863444/LOC107846976/LOC107870097/LOC107868016/LOC107850447/LOC107864341/LOC107867684/LOC107845290	sly:101261255/sly:101262830/sly:101268145/sly:101246511/sly:101256710/sly:101257097/sly:101251366/sly:101262822/sly:101246995/sly:101263592/sly:101263745/sly:101252984/sly:101264646/sly:101259447/sly:101260960/sly:101254485/sly:101256172/sly:101244443/sly:101265227/sly:101249020/sly:778338/sly:101243641	22	9	107839143/107878086/107854884/107855307/107840916/107848605/107863444/107867684/107845290	13	107847268/107873287/107842526/107874980/107850556/107879181/107840829/107852418/107846976/107870097/107868016/107850447/107864341
sly01210	2-Oxocarboxylic acid metabolism	22/1660	44/4052	0.142313	0.72731	107878547/107850416/107840659/107860923/107865960/107872937/107845928/107850527/107838765/107873175/107847729/107868013/107861641/107840325/107860178/107870684/107843119/107839125/107878424/107856744/107838766/107859795	LOC107878547/LOC107850416/LOC107840659/LOC107860923/LOC107865960/LOC107872937/LOC107845928/LOC107850527/LOC107838765/LOC107873175/LOC107847729/LOC107868013/LOC107861641/LOC107840325/LOC107860178/LOC107870684/LOC107843119/LOC107839125/LOC107878424/LOC107856744/LOC107838766/LOC107859795	sly:101253806/sly:101252944/sly:543751/sly:101246035/sly:101245573/sly:101250813/sly:101264873/sly:101264707/sly:101258686/sly:101245066/sly:101265236/sly:100301981/sly:101246328/sly:101252029/sly:101264475/sly:101267549/sly:101249011/sly:101260072/sly:101244094/sly:101247914/sly:101258399/sly:101253647	22	13	107878547/107865960/107850527/107873175/107847729/107868013/107861641/107840325/107860178/107870684/107843119/107839125/107859795	9	107850416/107840659/107860923/107872937/107845928/107838765/107878424/107856744/107838766
sly00945	Stilbenoid, diarylheptanoid and gingerol biosynthesis	11/1660	20/4052	0.146738	0.72731	107860278/107875407/107848097/107839366/107844729/107875625/107840863/107840262/107844023/107877492/107853336	LOC107860278/LOC107875407/LOC107848097/LOC107839366/LOC107844729/LOC107875625/LOC107840863/LOC107840262/LOC107844023/LOC107877492/LOC107853336	sly:101265690/sly:101244196/sly:101253556/sly:101246092/sly:101261765/sly:101244961/sly:544249/sly:101260278/sly:101262367/sly:101266953/sly:101252173	11	9	107860278/107875407/107848097/107839366/107844729/107840863/107840262/107844023/107853336	2	107875625/107877492
sly00620	Pyruvate metabolism	38/1660	82/4052	0.187387	0.89009	107862248/107871223/107867324/107878086/107851004/107862685/107867486/107862684/107864665/107870788/107843616/107864539/107840119/107845307/107859656/107874980/107871444/107850244/107877384/107870413/107840161/107847755/107864063/107869328/107864181/107856235/107873175/107873430/107850239/107846976/107842361/107870097/107862877/107856624/107878622/107870777/107861795/107842003	LOC107862248/LOC107871223/LOC107867324/LOC107878086/LOC107851004/LOC107862685/LOC107867486/LOC107862684/LOC107864665/LOC107870788/LOC107843616/LOC107864539/LOC107840119/LOC107845307/LOC107859656/LOC107874980/LOC107871444/LOC107850244/LOC107877384/LOC107870413/LOC107840161/LOC107847755/LOC107864063/LOC107869328/LOC107864181/LOC107856235/LOC107873175/LOC107873430/LOC107850239/LOC107846976/LOC107842…	sly:101258932/sly:544237/sly:543812/sly:101262830/sly:101265715/sly:101267103/sly:101252012/sly:101267395/sly:101261160/sly:101248407/sly:101265599/sly:101248141/sly:778286/sly:101261166/sly:101263864/sly:101262822/sly:543869/sly:101250973/sly:101265671/sly:101250010/sly:101259587/sly:101249193/sly:101265278/sly:101263236/sly:101253131/sly:101260691/sly:101245066/sly:101257775/sly:543805/sly:1012…	38	24	107862248/107871223/107867324/107878086/107862685/107867486/107862684/107843616/107845307/107850244/107877384/107870413/107840161/107847755/107864063/107869328/107856235/107873175/107862877/107856624/107878622/107870777/107861795/107842003	14	107851004/107864665/107870788/107864539/107840119/107859656/107874980/107871444/107864181/107873430/107850239/107846976/107842361/107870097
sly00380	Tryptophan metabolism	14/1660	28/4052	0.215897	0.984489	107843343/107878086/107861847/107850312/107859787/107874980/107842047/107879181/107847565/107845856/107846976/107870097/107839093/107850532	LOC107843343/LOC107878086/LOC107861847/LOC107850312/LOC107859787/LOC107874980/LOC107842047/LOC107879181/LOC107847565/LOC107845856/LOC107846976/LOC107870097/LOC107839093/LOC107850532	sly:104644402/sly:101262830/sly:101244469/sly:543990/sly:543585/sly:101262822/sly:101267265/sly:101263745/sly:101255659/sly:101262573/sly:101254485/sly:101256172/sly:101256506/sly:101259333	14	4	107878086/107861847/107842047/107845856	10	107843343/107850312/107859787/107874980/107879181/107847565/107846976/107870097/107839093/107850532
sly04146	Peroxisome	37/1660	82/4052	0.25373	0.999884	novel.6665/107860091/107854884/107840191/107839547/107857656/107850312/107873722/107855307/107873578/107857121/107859787/107840916/107871101/107849051/107845294/107875591/107847498/107852487/107838930/107852418/107853104/107859605/107841645/107860535/107847525/107868016/107850532/107851423/107861908/107850447/107871348/107845823/107864341/107867684/107845290/107870095	-/LOC107860091/LOC107854884/LOC107840191/LOC107839547/LOC107857656/LOC107850312/LOC107873722/LOC107855307/LOC107873578/LOC107857121/LOC107859787/LOC107840916/LOC107871101/LOC107849051/LOC107845294/LOC107875591/LOC107847498/LOC107852487/LOC107838930/LOC107	sly:101252586/sly:101264774/sly:101268145/sly:101243643/sly:101261961/sly:101255253/sly:543990/sly:101250222/sly:101257097/sly:101254098/sly:101250126/sly:543585/sly:101246995/sly:101256779/sly:101265751/sly:101251822/sly:101263821/sly:101249915/sly:101248290/sly:101249636/sly:101264646/sly:101248304/sly:101248834/sly:101259975/sly:101255297/sly:101251251/sly:101244443/sly:101259333/sly:101257154…	37	20	107860091/107854884/107840191/107839547/107857656/107855307/107873578/107857121/107840916/107871101/107845294/107875591/107852487/107838930/107853104/107847525/107851423/107871348/107867684/107845290	17	novel.6665/107850312/107873722/107859787/107849051/107847498/107852418/107859605/107841645/107860535/107868016/107850532/107861908/107850447/107845823/107864341/107870095
sly01200	Carbon metabolism	104/1660	241/4052	0.259126	0.999884	107848158/107862248/107839921/107858266/107845282/107871223/107867324/107878086/107851004/107852749/107862685/107860201/107878792/107871288/107847268/107867550/107839203/107861619/107860923/107843197/107850886/107862684/107861787/107864665/107870788/novel.4076/107850312/107843616/107877699/107851146/107864539/107840119/107842526/novel.1003/107845307/107859787/107866355/107838932/107871444/1078401…	LOC107848158/LOC107862248/LOC107839921/LOC107858266/LOC107845282/LOC107871223/LOC107867324/LOC107878086/LOC107851004/LOC107852749/LOC107862685/LOC107860201/LOC107878792/LOC107871288/LOC107847268/LOC107867550/LOC107839203/LOC107861619/LOC107860923/LOC107843197/LOC107850886/LOC107862684/LOC107861787/LOC107864665/LOC107870788/-/LOC107850312/LOC107843616/LOC107877699/LOC107851146/LOC107864539/LOC1078…	sly:101260137/sly:101258932/sly:101250548/sly:101254553/sly:101256813/sly:544237/sly:543812/sly:101262830/sly:101265715/sly:101247915/sly:101267103/sly:101258424/sly:101257583/sly:101256090/sly:101246511/sly:101247124/sly:101255033/sly:101266918/sly:101246035/sly:544068/sly:101255258/sly:101267395/sly:543779/sly:101261160/sly:101248407/sly:101260070/sly:543990/sly:101265599/sly:101253541/sly:1012…	104	54	107848158/107862248/107839921/107858266/107845282/107871223/107867324/107878086/107852749/107862685/107878792/107871288/107867550/107861619/107843197/107850886/107862684/107843616/novel.1003/107845307/107877384/107870413/107840161/107847755/107864063/107869328/107875306/107870147/107867328/107870847/107870207/107876107/107863539/107847729/107869222/107861641/107858551/107843407/107854867/10786287…	50	107851004/107860201/107847268/107839203/107860923/107861787/107864665/107870788/novel.4076/107850312/107877699/107851146/107864539/107840119/107842526/107859787/107866355/107838932/107871444/107840104/107878799/107845928/107847434/107871105/107840829/107870032/107840956/107864181/novel.946/107873430/107875831/107871175/107850239/107851030/novel.5863/107840969/107842361/107860713/107869777/novel.4…
sly04122	Sulfur relay system	6/1660	4052-11-01	0.26802	0.999884	107859361/107878745/107863678/107875723/107878883/107871449	LOC107859361/LOC107878745/LOC107863678/LOC107875723/LOC107878883/LOC107871449	sly:101247277/sly:101267426/sly:100301940/sly:101243795/sly:100301939/sly:101268304	6	2	107863678/107871449	4	107859361/107878745/107875723/107878883
sly00520	Amino sugar and nucleotide sugar metabolism	47/1660	106/4052	0.268082	0.999884	107854073/107877663/107859000/107875632/107864032/107878318/107845431/107863414/107860470/107875763/107862290/107840845/107878567/107850846/107840015/107839422/107872499/107861787/107862123/107865562/107878514/107845778/107845826/107873035/107860691/107852117/107866265/107870084/107875349/107845415/107876107/107864663/107866396/107860391/107839408/107851696/107840969/107843457/107877950/107843525…	LOC107854073/LOC107877663/LOC107859000/LOC107875632/LOC107864032/LOC107878318/LOC107845431/LOC107863414/LOC107860470/LOC107875763/LOC107862290/LOC107840845/LOC107878567/LOC107850846/LOC107840015/LOC107839422/LOC107872499/LOC107861787/LOC107862123/LOC107865562/LOC107878514/LOC107845778/LOC107845826/LOC107873035/LOC107860691/LOC107852117/LOC107866265/LOC107870084/LOC107875349/LOC107845415/LOC107876…	sly:101258487/sly:101257483/sly:101267862/sly:101244155/sly:101246662/sly:101267358/sly:101260709/sly:101250671/sly:101263958/sly:544022/sly:101261402/sly:101251855/sly:101249663/sly:101265535/sly:543515/sly:100316902/sly:101268802/sly:543779/sly:101266709/sly:101266745/sly:543968/sly:101247969/sly:101254852/sly:101249858/sly:101260589/sly:101247451/sly:101249670/sly:101252577/sly:101250314/sly:1…	47	30	107854073/107877663/107859000/107875632/107864032/107878318/107845431/107863414/107860470/107875763/107862290/107840845/107878567/107850846/107839422/107872499/107878514/107845826/107873035/107852117/107866265/107876107/107864663/107839408/107877950/107843525/107861169/107878072/107863463/107843374	17	107840015/107861787/107862123/107865562/107845778/107860691/107870084/107875349/107845415/107866396/107860391/107851696/107840969/107843457/107869136/107838884/107854571
sly00600	Sphingolipid metabolism	11/1660	23/4052	0.320254	0.999884	107862365/107838845/107847829/107866917/107873305/107868327/107871279/107847409/107877639/107873887/107848076	LOC107862365/LOC107838845/LOC107847829/LOC107866917/LOC107873305/LOC107868327/LOC107871279/LOC107847409/LOC107877639/LOC107873887/LOC107848076	sly:778364/sly:101244511/sly:101252083/sly:101262727/sly:101257269/sly:101263975/sly:101257860/sly:101256611/sly:101248229/sly:101246439/sly:101267524	11	4	107862365/107838845/107866917/107847409	7	107847829/107873305/107868327/107871279/107877639/107873887/107848076
sly00280	Valine, leucine and isoleucine degradation	20/1660	44/4052	0.32239	0.999884	107857412/107866243/107871223/107878086/107874980/107839576/107879181/107851288/107842300/107854372/107841645/107843407/107846976/107843533/107870097/107842329/107850884/107879803/107841325/107879455	LOC107857412/LOC107866243/LOC107871223/LOC107878086/LOC107874980/LOC107839576/LOC107879181/LOC107851288/LOC107842300/LOC107854372/LOC107841645/LOC107843407/LOC107846976/LOC107843533/LOC107870097/LOC107842329/LOC107850884/LOC107879803/LOC107841325/LOC107879455	sly:100134904/sly:101249394/sly:544237/sly:101262830/sly:101262822/sly:101245206/sly:101263745/sly:101260619/sly:101243918/sly:101254327/sly:101259975/sly:101248347/sly:101254485/sly:101263543/sly:101256172/sly:101263879/sly:101267118/sly:101258692/sly:543993/sly:101268723	20	7	107857412/107866243/107871223/107878086/107851288/107854372/107843407	13	107874980/107839576/107879181/107842300/107841645/107846976/107843533/107870097/107842329/107850884/107879803/107841325/107879455
sly00941	Flavonoid biosynthesis	14/1660	30/4052	0.323218	0.999884	107860278/107875407/107848097/107839366/107844729/107875625/107862334/107860031/107871256/107840863/107840262/107844023/107877492/107853336	LOC107860278/LOC107875407/LOC107848097/LOC107839366/LOC107844729/LOC107875625/LOC107862334/LOC107860031/LOC107871256/LOC107840863/LOC107840262/LOC107844023/LOC107877492/LOC107853336	sly:101265690/sly:101244196/sly:101253556/sly:101246092/sly:101261765/sly:101244961/sly:101266618/sly:544150/sly:778295/sly:544249/sly:101260278/sly:101262367/sly:101266953/sly:101252173	14	12	107860278/107875407/107848097/107839366/107844729/107862334/107860031/107871256/107840863/107840262/107844023/107853336	2	107875625/107877492
sly00740	Riboflavin metabolism	7/1660	14/4052	0.33437	0.999884	107840068/107862848/107870529/107856184/107847006/107863918/107871411	LOC107840068/LOC107862848/LOC107870529/LOC107856184/LOC107847006/LOC107863918/LOC107871411	sly:544238/sly:101249252/sly:101260420/sly:101261429/sly:101259864/sly:101248871/sly:101259936	7	6	107840068/107862848/107870529/107856184/107847006/107863918	1	107871411
sly00061	Fatty acid biosynthesis	16/1660	35/4052	0.341348	0.999884	107873188/107854884/107841760/107855307/107862888/107840916/107871444/107850244/107868897/107852418/107853744/107868016/107843945/107863583/107864341/107875344	LOC107873188/LOC107854884/LOC107841760/LOC107855307/LOC107862888/LOC107840916/LOC107871444/LOC107850244/LOC107868897/LOC107852418/LOC107853744/LOC107868016/LOC107843945/LOC107863583/LOC107864341/LOC107875344	sly:101246830/sly:101268145/sly:101245130/sly:101257097/sly:101249057/sly:101246995/sly:543869/sly:101250973/sly:101256463/sly:101264646/sly:101245377/sly:101244443/sly:101252237/sly:101266607/sly:101249020/sly:101249278	16	8	107873188/107854884/107841760/107855307/107862888/107840916/107850244/107853744	8	107871444/107868897/107852418/107868016/107843945/107863583/107864341/107875344
sly00062	Fatty acid elongation	16/1660	35/4052	0.341348	0.999884	107872813/107839065/107864657/107849942/107845580/107858588/107870144/107846850/107846933/107870238/107848634/107858717/107860042/107860712/107847631/107839042	LOC107872813/LOC107839065/LOC107864657/LOC107849942/LOC107845580/LOC107858588/LOC107870144/LOC107846850/LOC107846933/LOC107870238/LOC107848634/LOC107858717/LOC107860042/LOC107860712/LOC107847631/LOC107839042	sly:101246151/sly:101244691/sly:101262858/sly:101257933/sly:101268230/sly:101257332/sly:101245050/sly:101260109/sly:101260402/sly:101263911/sly:101255691/sly:101248828/sly:101245220/sly:101255347/sly:101252875/sly:101266659	16	8	107872813/107839065/107864657/107846850/107858717/107860042/107847631/107839042	8	107849942/107845580/107858588/107870144/107846933/107870238/107848634/107860712
sly04130	SNARE interactions in vesicular transport	15/1660	33/4052	0.360486	0.999884	107846179/107843713/107863302/107852770/107852786/107863860/107839663/107839103/107839046/107878764/107854559/107867412/107858585/107850543/107872818	LOC107846179/LOC107843713/LOC107863302/LOC107852770/LOC107852786/LOC107863860/LOC107839663/LOC107839103/LOC107839046/LOC107878764/LOC107854559/LOC107867412/LOC107858585/LOC107850543/LOC107872818	sly:101262338/sly:101247381/sly:101249333/sly:101249033/sly:101251106/sly:101245764/sly:101265370/sly:101250531/sly:101246033/sly:101262735/sly:101266082/sly:101259211/sly:101246592/sly:101261994/sly:101264019	15	7	107846179/107843713/107863302/107839663/107839103/107854559/107850543	8	107852770/107852786/107863860/107839046/107878764/107867412/107858585/107872818
sly00730	Thiamine metabolism	9/1660	19/4052	0.364609	0.999884	107842524/107860754/107850768/107859361/107842923/107850729/107847931/107852315/107871248	LOC107842524/LOC107860754/LOC107850768/LOC107859361/LOC107842923/LOC107850729/LOC107847931/LOC107852315/LOC107871248	sly:101246176/sly:101246297/sly:101251053/sly:101247277/sly:101261649/sly:101254478/sly:101267706/sly:544220/sly:101263028	9	5	107842524/107860754/107850768/107842923/107850729	4	107859361/107847931/107852315/107871248
sly03015	mRNA surveillance pathway	48/1660	112/4052	0.374565	0.999884	107839633/107870140/107870112/107847727/107870500/107856873/107878168/107850914/107859370/107847874/107839054/107843339/107863382/107850513/107847666/107873814/107850911/107846569/107867265/107842598/107845454/107876942/107843589/107839969/107862553/107843140/107871367/novel.4691/107847557/107852527/107851101/107875978/107840594/107875517/107872847/107842644/107868902/107873196/107878033/10787135…	LOC107839633/LOC107870140/LOC107870112/LOC107847727/LOC107870500/LOC107856873/LOC107878168/LOC107850914/LOC107859370/LOC107847874/LOC107839054/LOC107843339/LOC107863382/LOC107850513/LOC107847666/LOC107873814/LOC107850911/LOC107846569/LOC107867265/LOC107842598/LOC107845454/LOC107876942/LOC107843589/LOC107839969/LOC107862553/LOC107843140/LOC107871367/-/LOC107847557/LOC107852527/LOC107851101/LOC1078…	sly:101258308/sly:101268859/sly:101260528/sly:544183/sly:101256343/sly:101259365/sly:101246839/sly:101260293/sly:101254445/sly:101257170/sly:101263044/sly:101262878/sly:101246111/sly:101261596/sly:101251182/sly:101252803/sly:101251957/sly:101259772/sly:101254896/sly:101252517/sly:101261462/sly:101251795/sly:101268818/sly:101261756/sly:101252047/sly:101257402/sly:101246720/sly:101252047/sly:101266…	48	22	107839633/107870500/107856873/107847874/107839054/107843339/107863382/107873814/107850911/107842598/107847557/107851101/107840594/107875517/107872847/107868902/107873196/107878033/107871357/107850924/107854016/107847405	26	107870140/107870112/107847727/107878168/107850914/107859370/107850513/107847666/107846569/107867265/107845454/107876942/107843589/107839969/107862553/107843140/107871367/novel.4691/107852527/107875978/107842644/novel.164/107866284/107867565/107870910/107850987
sly01040	Biosynthesis of unsaturated fatty acids	8/1660	17/4052	0.390722	0.999884	107873188/107870144/107870238/107850447/107863583/107867684/107860712/107845290	LOC107873188/LOC107870144/LOC107870238/LOC107850447/LOC107863583/LOC107867684/LOC107860712/LOC107845290	sly:101246830/sly:101245050/sly:101263911/sly:101265227/sly:101266607/sly:778338/sly:101255347/sly:101243641	8	3	107873188/107867684/107845290	5	107870144/107870238/107850447/107863583/107860712
sly00052	Galactose metabolism	20/1660	46/4052	0.418491	0.999884	107840322/107860671/107859669/107843684/107859925/107862519/107839109/107861787/107865562/107862221/107845778/107870147/107873305/107876107/107863539/107845532/107840969/107847409/107843525/107840458	LOC107840322/LOC107860671/LOC107859669/LOC107843684/LOC107859925/LOC107862519/LOC107839109/LOC107861787/LOC107865562/LOC107862221/LOC107845778/LOC107870147/LOC107873305/LOC107876107/LOC107863539/LOC107845532/LOC107840969/LOC107847409/LOC107843525/LOC107840458	sly:101263843/sly:101257623/sly:101266532/sly:543502/sly:100316891/sly:101249166/sly:544236/sly:543779/sly:101266745/sly:101253766/sly:101247969/sly:101245938/sly:101257269/sly:543638/sly:101266704/sly:101248625/sly:778210/sly:101256611/sly:101263844/sly:101261450	20	11	107840322/107860671/107859669/107843684/107859925/107870147/107876107/107863539/107847409/107843525/107840458	9	107862519/107839109/107861787/107865562/107862221/107845778/107873305/107845532/107840969
sly01212	Fatty acid metabolism	27/1660	63/4052	0.426454	0.999884	107839143/107878086/107873188/107854884/107841760/107855307/107862888/107840916/107871444/107850244/107850556/107868897/107879181/107870144/107870238/107852418/107853744/107870097/107868016/107843945/107850447/107863583/novel.6463/107864341/107867684/107860712/107845290	LOC107839143/LOC107878086/LOC107873188/LOC107854884/LOC107841760/LOC107855307/LOC107862888/LOC107840916/LOC107871444/LOC107850244/LOC107850556/LOC107868897/LOC107879181/LOC107870144/LOC107870238/LOC107852418/LOC107853744/LOC107870097/LOC107868016/LOC107843945/LOC107850447/LOC107863583/-/LOC107864341/LOC107867684/LOC107860712/LOC107845290	sly:101261255/sly:101262830/sly:101246830/sly:101268145/sly:101245130/sly:101257097/sly:101249057/sly:101246995/sly:543869/sly:101250973/sly:101263592/sly:101256463/sly:101263745/sly:101245050/sly:101263911/sly:101264646/sly:101245377/sly:101256172/sly:101244443/sly:101252237/sly:101265227/sly:101266607/sly:101260474/sly:101249020/sly:778338/sly:101255347/sly:101243641	27	12	107839143/107878086/107873188/107854884/107841760/107855307/107862888/107840916/107850244/107853744/107867684/107845290	15	107871444/107850556/107868897/107879181/107870144/107870238/107852418/107870097/107868016/107843945/107850447/107863583/novel.6463/107864341/107860712
sly00250	Alanine, aspartate and glutamate metabolism	16/1660	37/4052	0.450452	0.999884	107854073/107838791/107860923/107863696/107850578/107870519/107845928/107875422/107847729/107848022/107850647/107861641/107868819/107864249/107839125/107878424	LOC107854073/LOC107838791/LOC107860923/LOC107863696/LOC107850578/LOC107870519/LOC107845928/LOC107875422/LOC107847729/LOC107848022/LOC107850647/LOC107861641/LOC107868819/LOC107864249/LOC107839125/LOC107878424	sly:101258487/sly:101259235/sly:101246035/sly:101264098/sly:100147722/sly:544275/sly:101264873/sly:101259343/sly:101265236/sly:101267891/sly:101259236/sly:101246328/sly:101250934/sly:100147726/sly:101260072/sly:101244094	16	9	107854073/107838791/107850578/107870519/107847729/107848022/107850647/107861641/107839125	7	107860923/107863696/107845928/107875422/107868819/107864249/107878424
sly00920	Sulfur metabolism	13/1660	30/4052	0.464505	0.999884	107859432/107859594/107858434/107878792/107863787/107839203/107878799/107859485/107863678/107840956/107878883/107864673/107848526	LOC107859432/LOC107859594/LOC107858434/LOC107878792/LOC107863787/LOC107839203/LOC107878799/LOC107859485/LOC107863678/LOC107840956/LOC107878883/LOC107864673/LOC107848526	sly:101259503/sly:544267/sly:101257319/sly:101257583/sly:101246318/sly:101255033/sly:101253301/sly:101251352/sly:100301940/sly:101266998/sly:100301939/sly:101259979/sly:101267663	13	8	107859432/107859594/107858434/107878792/107863787/107863678/107864673/107848526	5	107839203/107878799/107859485/107840956/107878883
sly00630	Glyoxylate and dicarboxylate metabolism	27/1660	64/4052	0.468378	0.999884	107858887/107862248/107839921/107871223/107878086/107851004/107862685/107860201/107871288/107862684/107850312/107870519/107864539/107840119/107859787/107866355/107838932/107867328/107864181/107847729/107842361/107854867/107870097/107843119/107850532/107858580/107878622	LOC107858887/LOC107862248/LOC107839921/LOC107871223/LOC107878086/LOC107851004/LOC107862685/LOC107860201/LOC107871288/LOC107862684/LOC107850312/LOC107870519/LOC107864539/LOC107840119/LOC107859787/LOC107866355/LOC107838932/LOC107867328/LOC107864181/LOC107847729/LOC107842361/LOC107854867/LOC107870097/LOC107843119/LOC107850532/LOC107858580/LOC107878622	sly:101251259/sly:101258932/sly:101250548/sly:544237/sly:101262830/sly:101265715/sly:101267103/sly:101258424/sly:101256090/sly:101267395/sly:543990/sly:544275/sly:101248141/sly:778286/sly:543585/sly:101251910/sly:101263138/sly:101264818/sly:101253131/sly:101265236/sly:101258530/sly:101255287/sly:101256172/sly:101249011/sly:101259333/sly:543974/sly:778285	27	15	107858887/107862248/107839921/107871223/107878086/107862685/107871288/107862684/107870519/107867328/107847729/107854867/107843119/107858580/107878622	12	107851004/107860201/107850312/107864539/107840119/107859787/107866355/107838932/107864181/107842361/107870097/107850532
sly00670	One carbon pool by folate	8/1660	18/4052	0.470192	0.999884	107839921/107871288/107850886/107838932/107870346/107867328/107851330/107874073	LOC107839921/LOC107871288/LOC107850886/LOC107838932/LOC107870346/LOC107867328/LOC107851330/LOC107874073	sly:101250548/sly:101256090/sly:101255258/sly:101263138/sly:100316897/sly:101264818/sly:101252648/sly:101265950	8	4	107839921/107871288/107850886/107867328	4	107838932/107870346/107851330/107874073
sly00770	Pantothenate and CoA biosynthesis	8/1660	18/4052	0.470192	0.999884	107847764/107847900/107878547/107850416/107850527/107862528/107852152/107847669	LOC107847764/LOC107847900/LOC107878547/LOC107850416/LOC107850527/LOC107862528/LOC107852152/LOC107847669	sly:101263146/sly:778322/sly:101253806/sly:101252944/sly:101264707/sly:101251764/sly:101267567/sly:101261880	8	7	107847764/107847900/107878547/107850527/107862528/107852152/107847669	1	107850416
sly04120	Ubiquitin mediated proteolysis	43/1660	103/4052	0.473146	0.999884	107845380/107850670/107842184/107859035/107840439/107875215/107842658/107843071/107866314/107843162/107843033/107845655/107839306/107839088/107845146/107851540/107870243/107843482/107851560/107878611/107863955/107862509/107877733/107841216/107848069/107858524/107845523/107861633/107842772/107843653/107855982/novel.36/107878629/107873329/107879370/107875362/novel.3146/107860548/107851222/107860536…	LOC107845380/LOC107850670/LOC107842184/LOC107859035/LOC107840439/LOC107875215/LOC107842658/LOC107843071/LOC107866314/LOC107843162/LOC107843033/LOC107845655/LOC107839306/LOC107839088/LOC107845146/LOC107851540/LOC107870243/LOC107843482/LOC107851560/LOC107878611/LOC107863955/LOC107862509/LOC107877733/LOC107841216/LOC107848069/LOC107858524/LOC107845523/LOC107861633/LOC107842772/LOC107843653/LOC107855…	sly:101260872/sly:101249698/sly:543547/sly:101260503/sly:101267748/sly:101247534/sly:101253520/sly:101248607/sly:101250720/sly:101250834/sly:101257890/sly:101251072/sly:101253831/sly:101254223/sly:101265083/sly:101244826/sly:101262418/sly:101254991/sly:101257937/sly:101266538/sly:101244048/sly:101250809/sly:101248999/sly:101252115/sly:101261295/sly:101267195/sly:101267744/sly:543683/sly:101249757…	43	19	107845380/107850670/107842184/107859035/107840439/107843071/107866314/107839306/107845146/107878611/107862509/107845523/107842772/107855982/107878629/107860548/107854682/107858424/107868103	24	107875215/107842658/107843162/107843033/107845655/107839088/107851540/107870243/107843482/107851560/107863955/107877733/107841216/107848069/107858524/107861633/107843653/novel.36/107873329/107879370/107875362/novel.3146/107851222/107860536
sly00592	alpha-Linolenic acid metabolism	15/1660	35/4052	0.473732	0.999884	107867080/107839143/107861665/107850386/107877738/107854684/107850556/107848240/107849665/107840371/107843908/107850447/107850651/107867684/107845290	LOC107867080/LOC107839143/LOC107861665/LOC107850386/LOC107877738/LOC107854684/LOC107850556/LOC107848240/LOC107849665/LOC107840371/LOC107843908/LOC107850447/LOC107850651/LOC107867684/LOC107845290	sly:606711/sly:101261255/sly:544009/sly:101251665/sly:543763/sly:544306/sly:101263592/sly:101266902/sly:101253743/sly:100736436/sly:101255254/sly:101265227/sly:101248256/sly:778338/sly:101243641	15	10	107867080/107839143/107861665/107850386/107877738/107854684/107849665/107840371/107867684/107845290	5	107850556/107848240/107843908/107850447/107850651
sly00640	Propanoate metabolism	15/1660	35/4052	0.473732	0.999884	107871223/107878086/107857656/107867486/107871444/107850244/107879181/107875306/107854372/107843407/107870097/107842329/107850884/107879803/107879455	LOC107871223/LOC107878086/LOC107857656/LOC107867486/LOC107871444/LOC107850244/LOC107879181/LOC107875306/LOC107854372/LOC107843407/LOC107870097/LOC107842329/LOC107850884/LOC107879803/LOC107879455	sly:544237/sly:101262830/sly:101255253/sly:101252012/sly:543869/sly:101250973/sly:101263745/sly:543863/sly:101254327/sly:101248347/sly:101256172/sly:101263879/sly:101267118/sly:101258692/sly:101268723	15	8	107871223/107878086/107857656/107867486/107850244/107875306/107854372/107843407	7	107871444/107879181/107870097/107842329/107850884/107879803/107879455
sly00565	Ether lipid metabolism	10/1660	23/4052	0.48177	0.999884	107866274/107865980/107839137/107839653/107872567/107852341/107872649/107879269/107859829/107843908	LOC107866274/LOC107865980/LOC107839137/LOC107839653/LOC107872567/LOC107852341/LOC107872649/LOC107879269/LOC107859829/LOC107843908	sly:544181/sly:101246167/sly:101264238/sly:101245304/sly:101267740/sly:544251/sly:543821/sly:101265364/sly:101246303/sly:101255254	10	7	107866274/107839137/107839653/107872567/107872649/107879269/107859829	3	107865980/107852341/107843908
sly00500	Starch and sucrose metabolism	47/1660	113/4052	0.481805	0.999884	107869091/107863145/107864541/107864313/107843684/107875763/107859190/107863438/107838770/107863104/107860527/107870811/107863475/107861787/107866823/107847877/107878514/107878002/107859646/107864054/107870503/107862814/107876107/107838905/107860137/107870854/107874940/107842585/107849925/107878565/107850686/107840969/107851586/107859350/107878744/107843525/107867836/107841367/107861169/107863463…	LOC107869091/LOC107863145/LOC107864541/LOC107864313/LOC107843684/LOC107875763/LOC107859190/LOC107863438/LOC107838770/LOC107863104/LOC107860527/LOC107870811/LOC107863475/LOC107861787/LOC107866823/LOC107847877/LOC107878514/LOC107878002/LOC107859646/LOC107864054/LOC107870503/LOC107862814/LOC107876107/LOC107838905/LOC107860137/LOC107870854/LOC107874940/LOC107842585/LOC107849925/LOC107878565/LOC107850…	sly:101253815/sly:101250960/sly:100736451/sly:101055573/sly:543502/sly:544022/sly:101245612/sly:101246803/sly:101259279/sly:101259221/sly:101252941/sly:101262611/sly:101259777/sly:543779/sly:101250886/sly:101256554/sly:543968/sly:101249741/sly:101266782/sly:101253025/sly:101259862/sly:101255377/sly:543638/sly:101248330/sly:101249596/sly:101257963/sly:778279/sly:101244113/sly:101251494/sly:1001349…	47	34	107869091/107863145/107864541/107864313/107843684/107875763/107859190/107863438/107863104/107860527/107863475/107866823/107847877/107878514/107878002/107862814/107876107/107860137/107870854/107842585/107849925/107878565/107850686/107851586/107859350/107878744/107843525/107867836/107861169/107863463/107857885/107852961/107855205/107852065	13	107838770/107870811/107861787/107859646/107864054/107870503/107838905/107874940/107840969/107841367/107871643/107839778/107855300
sly00230	Purine metabolism	34/1660	82/4052	0.505806	0.999884	107861661/107860754/107843922/107859400/107862601/107842923/107864665/107850729/107843891/107855296/107843616/107877384/107870413/107859270/107870346/107840161/107869328/107861725/107851217/107844177/107864057/107873430/107869222/107851394/107843100/107868819/107860240/107847788/107851330/107864673/107839860/107848351/107850302/107848526	LOC107861661/LOC107860754/LOC107843922/LOC107859400/LOC107862601/LOC107842923/LOC107864665/LOC107850729/LOC107843891/LOC107855296/LOC107843616/LOC107877384/LOC107870413/LOC107859270/LOC107870346/LOC107840161/LOC107869328/LOC107861725/LOC107851217/LOC107844177/LOC107864057/LOC107873430/LOC107869222/LOC107851394/LOC107843100/LOC107868819/LOC107860240/LOC107847788/LOC107851330/LOC107864673/LOC107839…	sly:101251456/sly:101246297/sly:101261672/sly:101245519/sly:101246124/sly:101261649/sly:101261160/sly:101254478/sly:101266279/sly:104648939/sly:101265599/sly:101265671/sly:101250010/sly:101268249/sly:100316897/sly:101259587/sly:101263236/sly:101263094/sly:101250287/sly:101253420/sly:101266068/sly:101257775/sly:101262942/sly:101248066/sly:101244800/sly:101250934/sly:101258302/sly:101254382/sly:101…	34	21	107861661/107860754/107843922/107859400/107862601/107842923/107850729/107843616/107877384/107870413/107840161/107869328/107861725/107864057/107869222/107851394/107843100/107847788/107864673/107848351/107848526	13	107864665/107843891/107855296/107859270/107870346/107851217/107844177/107873430/107868819/107860240/107851330/107839860/107850302
sly00400	Phenylalanine, tyrosine and tryptophan biosynthesis	17/1660	41/4052	0.533887	0.999884	107842110/107875636/107867463/107845682/107848320/107845345/107859273/107842508/107851006/107839528/107867808/107851104/107845928/107859592/107859855/107839125/107878424	LOC107842110/LOC107875636/LOC107867463/LOC107845682/LOC107848320/LOC107845345/LOC107859273/LOC107842508/LOC107851006/LOC107839528/LOC107867808/LOC107851104/LOC107845928/LOC107859592/LOC107859855/LOC107839125/LOC107878424	sly:101259361/sly:101247331/sly:544153/sly:101256422/sly:101247693/sly:101264863/sly:101251841/sly:543548/sly:100736464/sly:101255433/sly:543970/sly:101260030/sly:101264873/sly:101251350/sly:544273/sly:101260072/sly:101244094	17	14	107842110/107875636/107867463/107845682/107848320/107845345/107842508/107851006/107839528/107867808/107851104/107859592/107859855/107839125	3	107859273/107845928/107878424
sly00196	Photosynthesis - antenna proteins	8/1660	19/4052	0.54698	0.999884	107845349/107842738/107863778/107866744/107862252/107839061/107838850/107840025	LOC107845349/LOC107842738/LOC107863778/LOC107866744/LOC107862252/LOC107839061/LOC107838850/LOC107840025	sly:101253628/sly:101249002/sly:101243766/sly:101246628/sly:101268669/sly:101245729/sly:101264376/sly:101256629	8	1	107839061	7	107845349/107842738/107863778/107866744/107862252/107838850/107840025
sly00904	Diterpenoid biosynthesis	8/1660	19/4052	0.54698	0.999884	107840383/107859548/107852040/107845864/107845836/107874554/107853307/107872347	LOC107840383/LOC107859548/LOC107852040/LOC107845864/LOC107845836/LOC107874554/LOC107853307/LOC107872347	sly:100134888/sly:101263073/sly:100037505/sly:101255340/sly:100134890/sly:544303/sly:101261488/sly:101253681	8	8	107840383/107859548/107852040/107845864/107845836/107874554/107853307/107872347	0
sly00950	Isoquinoline alkaloid biosynthesis	8/1660	19/4052	0.54698	0.999884	107865520/107845345/107851006/107851104/107845928/107847449/107839125/107878424	LOC107865520/LOC107845345/LOC107851006/LOC107851104/LOC107845928/LOC107847449/LOC107839125/LOC107878424	sly:101254423/sly:101264863/sly:100736464/sly:101260030/sly:101264873/sly:101266123/sly:101260072/sly:101244094	8	6	107865520/107845345/107851006/107851104/107847449/107839125	2	107845928/107878424
sly03018	RNA degradation	38/1660	93/4052	0.548454	0.999884	107875683/107848258/107841846/107838901/107850743/107843197/107861912/107847543/107875666/107840138/107840917/107850513/107870147/107863539/107875708/107853184/107853072/107863914/107866882/107873478/107851352/107839171/107876060/novel.7135/107870656/107873501/107845325/107874909/107859743/107843834/107873423/107852273/107845472/107861994/107852700/107861675/107875567/107866739	LOC107875683/LOC107848258/LOC107841846/LOC107838901/LOC107850743/LOC107843197/LOC107861912/LOC107847543/LOC107875666/LOC107840138/LOC107840917/LOC107850513/LOC107870147/LOC107863539/LOC107875708/LOC107853184/LOC107853072/LOC107863914/LOC107866882/LOC107873478/LOC107851352/LOC107839171/LOC107876060/-/LOC107870656/LOC107873501/LOC107845325/LOC107874909/LOC107859743/LOC107843834/LOC107873423/LOC1078…	sly:101258270/sly:101268737/sly:101260608/sly:101245783/sly:101248085/sly:544068/sly:101263393/sly:101252746/sly:101254498/sly:101244620/sly:101246693/sly:101261596/sly:101245938/sly:101266704/sly:101267415/sly:101253419/sly:101245924/sly:104649355/sly:101258556/sly:101264125/sly:101268414/sly:101253227/sly:101252597/sly:101253117/sly:101261705/sly:101255403/sly:101249682/sly:101264455/sly:101243…	38	20	107875683/107848258/107841846/107850743/107843197/107861912/107847543/107840138/107870147/107863539/107853184/107853072/107863914/107866882/107873478/107839171/107870656/107874909/107859743/107845472	18	107838901/107875666/107840917/107850513/107875708/107851352/107876060/novel.7135/107873501/107845325/107843834/107873423/107852273/107861994/107852700/107861675/107875567/107866739
sly00053	Ascorbate and aldarate metabolism	14/1660	34/4052	0.555492	0.999884	107875751/107860470/107862290/107839422/107840121/107874980/107860691/107860116/107860653/107864663/107838688/107867450/107846976/107843896	LOC107875751/LOC107860470/LOC107862290/LOC107839422/LOC107840121/LOC107874980/LOC107860691/LOC107860116/LOC107860653/LOC107864663/LOC107838688/LOC107867450/LOC107846976/LOC107843896	sly:101055572/sly:101263958/sly:101261402/sly:100316902/sly:101254135/sly:101262822/sly:101260589/sly:101255942/sly:101253550/sly:100316874/sly:101251411/sly:101263901/sly:101254485/sly:544206	14	7	107875751/107860470/107862290/107839422/107860116/107864663/107838688	7	107840121/107874980/107860691/107860653/107867450/107846976/107843896
sly03022	Basal transcription factors	15/1660	37/4052	0.583512	0.999884	107843121/107845518/107843846/107877504/107850411/107867222/107870275/107862159/107873713/107863662/107859397/107875522/107879906/107876068/107858288	LOC107843121/LOC107845518/LOC107843846/LOC107877504/LOC107850411/LOC107867222/LOC107870275/LOC107862159/LOC107873713/LOC107863662/LOC107859397/LOC107875522/LOC107879906/LOC107876068/LOC107858288	sly:101264247/sly:101253325/sly:101252540/sly:101245072/sly:101254156/sly:101262209/sly:101244946/sly:101259036/sly:101255497/sly:101251406/sly:101244148/sly:101244295/sly:101250226/sly:101245068/sly:101254048	15	8	107843121/107843846/107877504/107850411/107867222/107862159/107859397/107875522	7	107845518/107870275/107873713/107863662/107879906/107876068/107858288
sly03410	Base excision repair	15/1660	37/4052	0.583512	0.999884	107845534/107847760/107857602/107847775/107859781/107840871/107875498/107873211/107847624/107859686/107854834/107869420/107859732/107843789/107870014	LOC107845534/LOC107847760/LOC107857602/LOC107847775/LOC107859781/LOC107840871/LOC107875498/LOC107873211/LOC107847624/LOC107859686/LOC107854834/LOC107869420/LOC107859732/LOC107843789/LOC107870014	sly:101258999/sly:101264323/sly:101255935/sly:101262281/sly:101257131/sly:101267869/sly:544248/sly:101262116/sly:101260506/sly:101262147/sly:101247901/sly:101250399/sly:101246304/sly:101264772/sly:101255875	15	9	107845534/107857602/107847775/107859781/107875498/107847624/107859686/107869420/107859732	6	107847760/107840871/107873211/107854834/107843789/107870014
sly04141	Protein processing in endoplasmic reticulum	70/1660	173/4052	0.584257	0.999884	107845380/107875543/107862224/107859093/107878665/107861257/107847930/107875203/107875506/107847826/107855710/107871975/107844499/107871202/107851540/107850876/107847506/107870243/107843850/107878074/107866771/107862719/107840392/107878174/107875863/107851227/107838916/107842861/107860377/107864375/107843974/107855124/107862794/107873089/107839821/107858767/107845333/107861633/107845403/107842772…	LOC107845380/LOC107875543/LOC107862224/LOC107859093/LOC107878665/LOC107861257/LOC107847930/LOC107875203/LOC107875506/LOC107847826/LOC107855710/LOC107871975/LOC107844499/LOC107871202/LOC107851540/LOC107850876/LOC107847506/LOC107870243/LOC107843850/LOC107878074/LOC107866771/LOC107862719/LOC107840392/LOC107878174/LOC107875863/LOC107851227/LOC107838916/LOC107842861/LOC107860377/LOC107864375/LOC107843…	sly:101260872/sly:100736433/sly:101243872/sly:101246787/sly:101254012/sly:101256444/sly:101257830/sly:101248688/sly:543848/sly:101248267/sly:543902/sly:101264183/sly:543798/sly:101247321/sly:101244826/sly:101258215/sly:101255395/sly:101262418/sly:101255531/sly:101252901/sly:101264927/sly:101247903/sly:101245405/sly:101245776/sly:101243898/sly:101246246/sly:101248399/sly:101263239/sly:101263175/sl…	70	27	107845380/107875543/107859093/107878665/107861257/107875203/107847826/107850876/107875863/107851227/107842861/107839821/107858767/107845333/107842772/107838718/107842196/107855982/107866776/107840991/107844894/107861598/107839924/107876000/107878126/107873370/novel.660	43	107862224/107847930/107875506/107855710/107871975/107844499/107871202/107851540/107847506/107870243/107843850/107878074/107866771/107862719/107840392/107878174/107838916/107860377/107864375/107843974/107855124/107862794/107873089/107861633/107845403/107842479/107859097/107870139/107839862/107878923/107875362/107852031/107853857/107840386/107870806/107852841/107877204/107863089/107866840/107878187…
sly01230	Biosynthesis of amino acids	82/1660	203/4052	0.594765	0.999884	107848158/107842110/107875636/107867463/107839921/107858266/107850602/107845282/107845682/107848320/novel.5432/107845345/107878792/107878547/107871288/107850416/107867550/107839203/107840659/107861619/107860923/107859273/107843197/107870410/107864665/107842508/107851006/107865960/107873263/107861704/107843616/107870519/107839528/107843129/107872937/107867808/107838932/107851104/107878799/10787738…	LOC107848158/LOC107842110/LOC107875636/LOC107867463/LOC107839921/LOC107858266/LOC107850602/LOC107845282/LOC107845682/LOC107848320/-/LOC107845345/LOC107878792/LOC107878547/LOC107871288/LOC107850416/LOC107867550/LOC107839203/LOC107840659/LOC107861619/LOC107860923/LOC107859273/LOC107843197/LOC107870410/LOC107864665/LOC107842508/LOC107851006/LOC107865960/LOC107873263/LOC107861704/LOC107843616/LOC1078…	sly:101260137/sly:101259361/sly:101247331/sly:544153/sly:101250548/sly:101254553/sly:101247506/sly:101256813/sly:101256422/sly:101247693/sly:101245890/sly:101264863/sly:101257583/sly:101253806/sly:101256090/sly:101252944/sly:101247124/sly:101255033/sly:543751/sly:101266918/sly:101246035/sly:101251841/sly:544068/sly:101248664/sly:101261160/sly:543548/sly:100736464/sly:101245573/sly:101244293/sly:1…	82	55	107848158/107842110/107875636/107867463/107839921/107858266/107850602/107845282/107845682/107848320/107845345/107878792/107878547/107871288/107867550/107861619/107843197/107842508/107851006/107865960/107873263/107843616/107870519/107839528/107843129/107867808/107851104/107877384/107870413/107840161/107869328/107850527/107870147/107867328/107870207/107863539/107873175/107847729/107868013/107848022…	27	novel.5432/107850416/107839203/107840659/107860923/107859273/107870410/107864665/107861704/107872937/107838932/107878799/107845928/107838765/107840956/107873430/107871485/107851030/novel.5066/107878882/107878424/107859210/107856744/107843644/107838766/107878843/107862261
sly00760	Nicotinate and nicotinamide metabolism	8/1660	20/4052	0.618759	0.999884	107874740/107862603/107863696/107860287/107875591/107861725/107863875/107867787	LOC107874740/LOC107862603/LOC107863696/LOC107860287/LOC107875591/LOC107861725/LOC107863875/LOC107867787	sly:101263635/sly:101246910/sly:101264098/sly:101264576/sly:101263821/sly:101263094/sly:101245868/sly:101266835	8	6	107874740/107862603/107860287/107875591/107861725/107863875	2	107863696/107867787
sly00940	Phenylpropanoid biosynthesis	43/1660	108/4052	0.633378	0.999884	107860278/107840027/107875407/107854291/107862076/107843092/107851630/107848097/107868752/107839366/107854094/107844729/107875625/107874082/107847877/107860206/107862991/107861887/107875995/107859584/107840010/107840863/107848279/107861303/107869755/107850276/107861980/107840262/107854671/107838905/107844023/107872642/107876528/107856092/107861981/107851230/107877492/107853336/107842218/107860325…	LOC107860278/LOC107840027/LOC107875407/LOC107854291/LOC107862076/LOC107843092/LOC107851630/LOC107848097/LOC107868752/LOC107839366/LOC107854094/LOC107844729/LOC107875625/LOC107874082/LOC107847877/LOC107860206/LOC107862991/LOC107861887/LOC107875995/LOC107859584/LOC107840010/LOC107840863/LOC107848279/LOC107861303/LOC107869755/LOC107850276/LOC107861980/LOC107840262/LOC107854671/LOC107838905/LOC107844…	sly:101265690/sly:544293/sly:101244196/sly:101243656/sly:101249624/sly:101243922/sly:101260194/sly:101253556/sly:101253377/sly:101246092/sly:101245316/sly:101261765/sly:101244961/sly:101261260/sly:101256554/sly:101257228/sly:101251452/sly:101254287/sly:101248210/sly:101253648/sly:101265285/sly:544249/sly:101266599/sly:101267763/sly:101255909/sly:101259903/sly:100125904/sly:101260278/sly:101256157…	43	32	107860278/107840027/107875407/107854291/107862076/107843092/107851630/107848097/107868752/107839366/107854094/107844729/107847877/107860206/107862991/107861887/107875995/107840863/107848279/107861303/107869755/107861980/107840262/107854671/107844023/107872642/107861981/107853336/107842218/107860325/107874883/107855205	11	107875625/107874082/107859584/107840010/107850276/107838905/107876528/107856092/107851230/107877492/107847568
sly00130	Ubiquinone and other terpenoid-quinone biosynthesis	15/1660	38/4052	0.634736	0.999884	107875407/107862076/107845345/107848299/107875995/107851104/107870331/107869755/107859509/107875484/107859040/107870882/107859398/107847568/107870618	LOC107875407/LOC107862076/LOC107845345/LOC107848299/LOC107875995/LOC107851104/LOC107870331/LOC107869755/LOC107859509/LOC107875484/LOC107859040/LOC107870882/LOC107859398/LOC107847568/LOC107870618	sly:101244196/sly:101249624/sly:101264863/sly:101262657/sly:101248210/sly:101260030/sly:101248379/sly:101255909/sly:101245803/sly:101257778/sly:101259906/sly:101257377/sly:101245223/sly:101249706/sly:101245351	15	12	107875407/107862076/107845345/107848299/107875995/107851104/107870331/107869755/107859509/107870882/107859398/107870618	3	107875484/107859040/107847568
sly00100	Steroid biosynthesis	11/1660	28/4052	0.641811	0.999884	107875519/107839483/107840596/107866563/107843191/107875679/107863753/107875372/107843908/107840471/107851175	LOC107875519/LOC107839483/LOC107840596/LOC107866563/LOC107843191/LOC107875679/LOC107863753/LOC107875372/LOC107843908/LOC107840471/LOC107851175	sly:100736533/sly:101252433/sly:101247376/sly:101262546/sly:100750253/sly:101256596/sly:101249150/sly:101259646/sly:101255254/sly:100316899/sly:100301930	11	6	107875519/107839483/107840596/107875679/107863753/107840471	5	107866563/107843191/107875372/107843908/107851175
sly00511	Other glycan degradation	4/1660	4052-10-01	0.641888	0.999884	107863389/107863528/107847409/107843457	LOC107863389/LOC107863528/LOC107847409/LOC107843457	sly:101254568/sly:101267007/sly:101256611/sly:100529103	4	1	107847409	3	107863389/107863528/107843457
sly00010	Glycolysis / Gluconeogenesis	42/1660	106/4052	0.648109	0.999884	107845282/107871223/107867324/107851004/107847268/107867550/107862519/107843197/107867486/107861787/107864665/107843616/107842526/107874980/107840104/107862221/107877384/107870413/107840161/107869328/107874609/107870147/107840829/107870207/107876107/107863539/107845990/107873430/107877951/107851030/107863444/107858551/107840969/107846976/107878882/107862877/107863463/107856624/107842839/107843644…	LOC107845282/LOC107871223/LOC107867324/LOC107851004/LOC107847268/LOC107867550/LOC107862519/LOC107843197/LOC107867486/LOC107861787/LOC107864665/LOC107843616/LOC107842526/LOC107874980/LOC107840104/LOC107862221/LOC107877384/LOC107870413/LOC107840161/LOC107869328/LOC107874609/LOC107870147/LOC107840829/LOC107870207/LOC107876107/LOC107863539/LOC107845990/LOC107873430/LOC107877951/LOC107851030/LOC107863…	sly:101256813/sly:544237/sly:543812/sly:101265715/sly:101246511/sly:101247124/sly:101249166/sly:544068/sly:101252012/sly:543779/sly:101261160/sly:101265599/sly:101251366/sly:101262822/sly:101253137/sly:101253766/sly:101265671/sly:101250010/sly:101259587/sly:101263236/sly:101254910/sly:101245938/sly:101252984/sly:101260332/sly:543638/sly:101266704/sly:101247173/sly:101257775/sly:101265043/sly:1012…	42	23	107845282/107871223/107867324/107867550/107843197/107867486/107843616/107877384/107870413/107840161/107869328/107874609/107870147/107870207/107876107/107863539/107845990/107863444/107858551/107862877/107863463/107856624/107842839	19	107851004/107847268/107862519/107861787/107864665/107842526/107874980/107840104/107862221/107840829/107873430/107877951/107851030/107840969/107846976/107878882/107843644/107855325/107878843
sly00350	Tyrosine metabolism	14/1660	36/4052	0.661182	0.999884	107865520/107845345/107847268/107851006/107842526/107851104/107845928/107842433/107840829/107847449/107863444/107839125/107878424/107870882	LOC107865520/LOC107845345/LOC107847268/LOC107851006/LOC107842526/LOC107851104/LOC107845928/LOC107842433/LOC107840829/LOC107847449/LOC107863444/LOC107839125/LOC107878424/LOC107870882	sly:101254423/sly:101264863/sly:101246511/sly:100736464/sly:101251366/sly:101260030/sly:101264873/sly:543605/sly:101252984/sly:101266123/sly:101260960/sly:101260072/sly:101244094/sly:101257377	14	8	107865520/107845345/107851006/107851104/107847449/107863444/107839125/107870882	6	107847268/107842526/107845928/107842433/107840829/107878424
sly04144	Endocytosis	61/1660	154/4052	0.665928	0.999884	107866274/107861758/107847805/107875543/107840559/107843415/107877979/107859654/107860039/107878256/107866184/107875128/107850466/107851527/107862121/novel.5844/107859864/107875633/novel.514/107867978/107878702/107839855/107853717/107839653/107858761/107838904/107859562/107845482/107871007/107873248/107870749/107875647/107875515/107870222/107878757/107852341/107848567/107863466/107850994/10787264…	LOC107866274/LOC107861758/LOC107847805/LOC107875543/LOC107840559/LOC107843415/LOC107877979/LOC107859654/LOC107860039/LOC107878256/LOC107866184/LOC107875128/LOC107850466/LOC107851527/LOC107862121/-/LOC107859864/LOC107875633/-/LOC107867978/LOC107878702/LOC107839855/LOC107853717/LOC107839653/LOC107858761/LOC107838904/LOC107859562/LOC107845482/LOC107871007/LOC107873248/LOC107870749/LOC107875647/LOC10…	sly:544181/sly:101247200/sly:101258366/sly:100736433/sly:101263355/sly:101267950/sly:101265657/sly:101265393/sly:101246301/sly:101259044/sly:101256646/sly:101260383/sly:101253169/sly:101259697/sly:101246911/sly:101260916/sly:101263663/sly:101246147/sly:101260383/sly:101251739/sly:101244017/sly:101263852/sly:101248300/sly:101245304/sly:101248166/sly:101264460/sly:101258121/sly:101266271/sly:101248…	61	40	107866274/107861758/107847805/107875543/107840559/107843415/107877979/107859654/107860039/107850466/107851527/107862121/107859864/107875633/107878702/107839855/107839653/107838904/107859562/107871007/107873248/107875647/107875515/107878757/107863466/107872649/107861872/107871008/107867723/107843335/107879269/107858497/107866898/107876154/107845049/107859829/107855593/107844788/107840494/107838734	21	107878256/107866184/107875128/novel.5844/novel.514/107867978/107853717/107858761/107845482/107870749/107870222/107852341/107848567/107850994/107843653/107851820/107839862/107850806/107847558/107850491/107867592
sly00591	Linoleic acid metabolism	5/1660	13/4052	0.673583	0.999884	107861665/107865522/107847934/107864114/107843908	LOC107861665/LOC107865522/LOC107847934/LOC107864114/LOC107843908	sly:544009/sly:101257007/sly:543994/sly:101256707/sly:101255254	5	4	107861665/107865522/107847934/107864114	1	107843908
sly00960	Tropane, piperidine and pyridine alkaloid biosynthesis	10/1660	26/4052	0.673584	0.999884	107867623/107865520/107845345/107851006/107851104/107845928/107847449/107839125/107878424/107842827	LOC107867623/LOC107865520/LOC107845345/LOC107851006/LOC107851104/LOC107845928/LOC107847449/LOC107839125/LOC107878424/LOC107842827	sly:101263402/sly:101254423/sly:101264863/sly:100736464/sly:101260030/sly:101264873/sly:101266123/sly:101260072/sly:101244094/sly:101254516	10	8	107867623/107865520/107845345/107851006/107851104/107847449/107839125/107842827	2	107845928/107878424
sly00563	Glycosylphosphatidylinositol (GPI)-anchor biosynthesis	8/1660	21/4052	0.683942	0.999884	107859837/107845456/107848032/107865877/107842663/107869996/107850697/107860608	LOC107859837/LOC107845456/LOC107848032/LOC107865877/LOC107842663/LOC107869996/LOC107850697/LOC107860608	sly:101248350/sly:101249586/sly:101250029/sly:101244104/sly:101254419/sly:101253473/sly:101264537/sly:101244825	8	1	107860608	7	107859837/107845456/107848032/107865877/107842663/107869996/107850697
sly03010	Ribosome	84/1660	213/4052	0.70382	0.999884	novel.3258/107843747/107864968/107875740/107863459/107842126/107855212/19989077/107840301/107848528/107859367/107854701/107848080/107851016/107843430/107875394/107873563/107848099/107844240/107851116/107876878/107845565/107860327/107842963/107861996/107855129/107877883/107873638/107844440/107855577/107852416/107864058/107839078/107867754/107875960/107876080/107843173/107843363/107848475/107848082…	-/LOC107843747/LOC107864968/LOC107875740/LOC107863459/LOC107842126/LOC107855212/rps12/LOC107840301/LOC107848528/LOC107859367/LOC107854701/LOC107848080/LOC107851016/LOC107843430/LOC107875394/LOC107873563/LOC107848099/LOC107844240/LOC107851116/LOC107876878/	sly:101265930/sly:101259299/sly:101244648/sly:101256335/sly:101265413/sly:101260624/sly:101251486/sly:101262684/sly:544096/sly:101248825/sly:101255358/sly:101263197/sly:101258620/sly:101251434/sly:101252133/sly:101266952/sly:101250510/sly:101257063/sly:101268800/sly:101248086/sly:101254712/sly:101264138/sly:101250850/sly:101254027/sly:101268852/sly:101261236/sly:101246068/sly:543752/sly:101258206…	84	15	novel.3258/19989077/107861996/107855129/107877883/107843173/107862288/107843011/107875121/107864214/107875580/19989171/107847690/107875483/107871272	69	107843747/107864968/107875740/107863459/107842126/107855212/107840301/107848528/107859367/107854701/107848080/107851016/107843430/107875394/107873563/107848099/107844240/107851116/107876878/107845565/107860327/107842963/107873638/107844440/107855577/107852416/107864058/107839078/107867754/107875960/107876080/107843363/107848475/107848082/107860182/107850180/107843260/107875304/107843333/107875392…
sly00030	Pentose phosphate pathway	17/1660	45/4052	0.720137	0.999884	107848158/107852749/107878559/107840104/107847434/107870147/107863539/107871175/107869222/107858551/107870592/107844927/107863463/107843644/107863060/107878843/107862261	LOC107848158/LOC107852749/LOC107878559/LOC107840104/LOC107847434/LOC107870147/LOC107863539/LOC107871175/LOC107869222/LOC107858551/LOC107870592/LOC107844927/LOC107863463/LOC107843644/LOC107863060/LOC107878843/LOC107862261	sly:101260137/sly:101247915/sly:101251203/sly:101253137/sly:101264118/sly:101245938/sly:101266704/sly:101258494/sly:101262942/sly:101249787/sly:101265735/sly:101247372/sly:101262594/sly:101262466/sly:101262229/sly:101243907/sly:101264109	17	10	107848158/107852749/107870147/107863539/107869222/107858551/107870592/107844927/107863463/107863060	7	107878559/107840104/107847434/107871175/107843644/107878843/107862261
sly00780	Biotin metabolism	4/1660	4052-11-01	0.726434	0.999884	107868897/107877502/107853744/107843945	LOC107868897/LOC107877502/LOC107853744/LOC107843945	sly:101256463/sly:101244782/sly:101245377/sly:101252237	4	1	107853744	3	107868897/107877502/107843945
sly00908	Zeatin biosynthesis	10/1660	27/4052	0.727151	0.999884	107854914/107843843/107866953/107845171/107843844/107867342/107843853/107845158/107853864/107844699	LOC107854914/LOC107843843/LOC107866953/LOC107845171/LOC107843844/LOC107867342/LOC107843853/LOC107845158/LOC107853864/LOC107844699	sly:100874537/sly:101246295/sly:101055612/sly:101253738/sly:101251633/sly:101263012/sly:100874536/sly:101252238/sly:101263304/sly:101248187	10	5	107854914/107843843/107866953/107845171/107845158	5	107843844/107867342/107843853/107853864/107844699
sly04145	Phagosome	29/1660	76/4052	0.731008	0.999884	107873469/107863302/107853469/107861644/107859654/107859856/107843763/novel.3171/107854460/107858591/107862719/107858888/107875863/107845374/107871474/107867812/107873089/107845403/novel.4666/107851820/107851704/107850543/107864415/107875500/107876000/107867960/107855593/107864404/107868196	LOC107873469/LOC107863302/LOC107853469/LOC107861644/LOC107859654/LOC107859856/LOC107843763/-/LOC107854460/LOC107858591/LOC107862719/LOC107858888/LOC107875863/LOC107845374/LOC107871474/LOC107867812/LOC107873089/LOC107845403/-/LOC107851820/LOC107851704/LOC107850543/LOC107864415/LOC107875500/LOC107876000/LOC107867960/LOC107855593/LOC107864404/LOC107868196	sly:101262621/sly:101249333/sly:101265829/sly:101246905/sly:101265393/sly:104645763/sly:101248630/sly:101245021/sly:101252196/sly:101254357/sly:101247903/sly:101251552/sly:101243898/sly:101245703/sly:101254490/sly:101246756/sly:101245632/sly:101259292/sly:543862/sly:101258647/sly:101248956/sly:101261994/sly:101256222/sly:101262728/sly:101247033/sly:101259601/sly:101257955/sly:101265947/sly:101244…	29	15	107873469/107863302/107861644/107859654/107859856/107858591/107875863/107871474/107851704/107850543/107875500/107876000/107855593/107864404/107868196	14	107853469/107843763/novel.3171/107854460/107862719/107858888/107845374/107867812/107873089/107845403/novel.4666/107851820/107864415/107867960
sly00790	Folate biosynthesis	8/1660	22/4052	0.741647	0.999884	107840068/107850488/107845624/107842594/107845532/107875723/107875989/107870005	LOC107840068/LOC107850488/LOC107845624/LOC107842594/LOC107845532/LOC107875723/LOC107875989/LOC107870005	sly:544238/sly:543912/sly:100191135/sly:101250171/sly:101248625/sly:101243795/sly:101250605/sly:101246415	8	2	107840068/107850488	6	107845624/107842594/107845532/107875723/107875989/107870005
sly00564	Glycerophospholipid metabolism	33/1660	87/4052	0.754495	0.999884	107866274/107878499/107860821/107872293/107855115/107856742/107865980/107862601/107867060/107854912/107871044/107839137/107872943/107839653/107839197/107856750/107872567/107852341/107876040/107850570/107859018/107872649/107879269/107859829/107857605/107843908/107845658/107842762/107850651/107843925/107858880/107878481/107868461	LOC107866274/LOC107878499/LOC107860821/LOC107872293/LOC107855115/LOC107856742/LOC107865980/LOC107862601/LOC107867060/LOC107854912/LOC107871044/LOC107839137/LOC107872943/LOC107839653/LOC107839197/LOC107856750/LOC107872567/LOC107852341/LOC107876040/LOC107850570/LOC107859018/LOC107872649/LOC107879269/LOC107859829/LOC107857605/LOC107843908/LOC107845658/LOC107842762/LOC107850651/LOC107843925/LOC107858…	sly:544181/sly:101247838/sly:101261081/sly:101257357/sly:101262422/sly:101268277/sly:101246167/sly:101246124/sly:101248193/sly:101264154/sly:543901/sly:101264238/sly:543838/sly:101245304/sly:101254424/sly:101267988/sly:101267740/sly:544251/sly:101266950/sly:101255984/sly:101256870/sly:543821/sly:101265364/sly:101246303/sly:101253668/sly:101255254/sly:101257308/sly:101251501/sly:101248256/sly:1012…	33	17	107866274/107878499/107860821/107872293/107855115/107862601/107867060/107854912/107871044/107839137/107839653/107872567/107850570/107872649/107879269/107859829/107842762	16	107856742/107865980/107872943/107839197/107856750/107852341/107876040/107859018/107857605/107843908/107845658/107850651/107843925/107858880/107878481/107868461
sly00290	Valine, leucine and isoleucine biosynthesis	6/1660	17/4052	0.762493	0.999884	107878547/107850416/107872937/107850527/107873175/107856744	LOC107878547/LOC107850416/LOC107872937/LOC107850527/LOC107873175/LOC107856744	sly:101253806/sly:101252944/sly:101250813/sly:101264707/sly:101245066/sly:101247914	6	3	107878547/107850527/107873175	3	107850416/107872937/107856744
sly00910	Nitrogen metabolism	7/1660	20/4052	0.777755	0.999884	107867964/107840295/107860201/107870519/107847814/107853280/107843241	LOC107867964/LOC107840295/LOC107860201/LOC107870519/LOC107847814/LOC107853280/LOC107843241	sly:100736473/sly:778325/sly:101258424/sly:544275/sly:543802/sly:778326/sly:101254722	7	4	107867964/107840295/107870519/107847814	3	107860201/107853280/107843241
sly00430	Taurine and hypotaurine metabolism	4/1660	4052-12-01	0.795044	0.999884	107838791/107850578/107862372/107860549	LOC107838791/LOC107850578/LOC107862372/LOC107860549	sly:101259235/sly:100147722/sly:101267102/sly:101258715	4	2	107838791/107850578	2	107862372/107860549
sly00020	Citrate cycle (TCA cycle)	18/1660	50/4052	0.805326	0.999884	107843004/107862248/107871223/107867324/107864539/107840119/107864063/107875306/107870847/107864181/107842361/107860713/107862877/107843119/107856624/107878622/107859955/107859795	LOC107843004/LOC107862248/LOC107871223/LOC107867324/LOC107864539/LOC107840119/LOC107864063/LOC107875306/LOC107870847/LOC107864181/LOC107842361/LOC107860713/LOC107862877/LOC107843119/LOC107856624/LOC107878622/LOC107859955/LOC107859795	sly:101246135/sly:101258932/sly:544237/sly:543812/sly:101248141/sly:778286/sly:101265278/sly:543863/sly:101253277/sly:101253131/sly:101258530/sly:100736507/sly:101248181/sly:101249011/sly:101256355/sly:778285/sly:101256641/sly:101253647	18	13	107843004/107862248/107871223/107867324/107864063/107875306/107870847/107862877/107843119/107856624/107878622/107859955/107859795	5	107864539/107840119/107864181/107842361/107860713
sly00562	Inositol phosphate metabolism	21/1660	58/4052	0.809186	0.999884	107875799/107862089/107850486/107861644/107870994/107861649/107854460/107867077/107867978/107851080/107858484/107870207/107854132/107867848/107850475/107850725/107850683/107867960/107879455/107873421/107860247	LOC107875799/LOC107862089/LOC107850486/LOC107861644/LOC107870994/LOC107861649/LOC107854460/LOC107867077/LOC107867978/LOC107851080/LOC107858484/LOC107870207/LOC107854132/LOC107867848/LOC107850475/LOC107850725/LOC107850683/LOC107867960/LOC107879455/LOC107873421/LOC107860247	sly:101262819/sly:101247600/sly:101253265/sly:101246905/sly:543809/sly:101248857/sly:101252196/sly:101247013/sly:101251739/sly:101253363/sly:101251565/sly:101260332/sly:101259347/sly:101256545/sly:101248349/sly:101262540/sly:544226/sly:101259601/sly:101268723/sly:100301920/sly:101247275	21	16	107875799/107862089/107850486/107861644/107870994/107861649/107867077/107858484/107870207/107854132/107867848/107850475/107850725/107850683/107873421/107860247	5	107854460/107867978/107851080/107867960/107879455
sly00460	Cyanoamino acid metabolism	10/1660	29/4052	0.815782	0.999884	107839921/107860201/107871288/107839203/107847877/107838932/107867328/107865788/107838905/107855205	LOC107839921/LOC107860201/LOC107871288/LOC107839203/LOC107847877/LOC107838932/LOC107867328/LOC107865788/LOC107838905/LOC107855205	sly:101250548/sly:101258424/sly:101256090/sly:101255033/sly:101256554/sly:101263138/sly:101264818/sly:101250204/sly:101248330/sly:100191127	10	6	107839921/107871288/107847877/107867328/107865788/107855205	4	107860201/107839203/107838932/107838905
sly00590	Arachidonic acid metabolism	4/1660	13/4052	0.849027	0.999884	107866862/107864929/107843908/107875989	LOC107866862/LOC107864929/LOC107843908/LOC107875989	sly:101268179/sly:544197/sly:101255254/sly:101250605	4	2	107866862/107864929	2	107843908/107875989
sly04933	AGE-RAGE signaling pathway in diabetic complications	4/1660	13/4052	0.849027	0.999884	107859856/107858591/107873421/107868196	LOC107859856/LOC107858591/LOC107873421/LOC107868196	sly:104645763/sly:101254357/sly:100301920/sly:101244348	4	4	107859856/107858591/107873421/107868196	0
sly00480	Glutathione metabolism	28/1660	78/4052	0.849961	0.999884	107875145/107842864/107854335/107852749/107845660/107855970/107858803/107852922/107866830/107864929/107861040/107865075/107859660/107838848/107847831/107842862/107843765/107842984/107873717/107871175/107864533/107848053/107867450/107839536/107854742/107842163/107878538/107865894	LOC107875145/LOC107842864/LOC107854335/LOC107852749/LOC107845660/LOC107855970/LOC107858803/LOC107852922/LOC107866830/LOC107864929/LOC107861040/LOC107865075/LOC107859660/LOC107838848/LOC107847831/LOC107842862/LOC107843765/LOC107842984/LOC107873717/LOC107871175/LOC107864533/LOC107848053/LOC107867450/LOC107839536/LOC107854742/LOC107842163/LOC107878538/LOC107865894	sly:101268500/sly:101266750/sly:101248761/sly:101247915/sly:101255036/sly:543894/sly:101268216/sly:101266084/sly:544209/sly:544197/sly:101267923/sly:543536/sly:101263072/sly:543813/sly:544177/sly:101265571/sly:101258000/sly:101246654/sly:101256384/sly:101258494/sly:101250053/sly:101249821/sly:101263901/sly:543537/sly:101266488/sly:101265853/sly:101244013/sly:101259327	28	20	107875145/107842864/107854335/107852749/107855970/107858803/107852922/107866830/107864929/107861040/107865075/107859660/107838848/107847831/107842862/107848053/107839536/107854742/107842163/107878538	8	107845660/107843765/107842984/107873717/107871175/107864533/107867450/107865894
sly03008	Ribosome biogenesis in eukaryotes	26/1660	73/4052	0.855264	0.999884	107850889/107850743/107861777/107863533/107851533/107867738/107843833/107871401/107845407/107874054/107862536/107873424/107866882/107846366/107850954/107864654/107859696/107860398/107870943/novel.1425/107853493/107843054/107875330/107848351/107860209/107878901	LOC107850889/LOC107850743/LOC107861777/LOC107863533/LOC107851533/LOC107867738/LOC107843833/LOC107871401/LOC107845407/LOC107874054/LOC107862536/LOC107873424/LOC107866882/LOC107846366/LOC107850954/LOC107864654/LOC107859696/LOC107860398/LOC107870943/-/LOC107853493/LOC107843054/LOC107875330/LOC107848351/LOC107860209/LOC107878901	sly:101253905/sly:101248085/sly:101252860/sly:101267297/sly:101252008/sly:101258649/sly:101256636/sly:101255995/sly:101259578/sly:101249952/sly:101253879/sly:101253090/sly:101258556/sly:101248232/sly:101252549/sly:101263757/sly:101255259/sly:101249976/sly:101245655/sly:101256636/sly:101258364/sly:101255622/sly:101245772/sly:101055607/sly:101256338/sly:101258878	26	17	107850889/107850743/107863533/107867738/107871401/107845407/107874054/107862536/107866882/107846366/107850954/107864654/107853493/107875330/107848351/107860209/107878901	9	107861777/107851533/107843833/107873424/107859696/107860398/107870943/novel.1425/107843054
sly00260	Glycine, serine and threonine metabolism	21/1660	60/4052	0.860108	0.999884	107839921/107858266/107845682/107871223/107865520/107871288/107867550/107861619/107870410/107861704/107839528/107866355/107838932/107849051/107867328/107838765/107847449/107847729/107851030/107855640/107838766	LOC107839921/LOC107858266/LOC107845682/LOC107871223/LOC107865520/LOC107871288/LOC107867550/LOC107861619/LOC107870410/LOC107861704/LOC107839528/LOC107866355/LOC107838932/LOC107849051/LOC107867328/LOC107838765/LOC107847449/LOC107847729/LOC107851030/LOC107855640/LOC107838766	sly:101250548/sly:101254553/sly:101256422/sly:544237/sly:101254423/sly:101256090/sly:101247124/sly:101266918/sly:101248664/sly:101260521/sly:101255433/sly:101251910/sly:101263138/sly:101265751/sly:101264818/sly:101258686/sly:101266123/sly:101265236/sly:101265817/sly:101249833/sly:101258399	21	12	107839921/107858266/107845682/107871223/107865520/107871288/107867550/107861619/107839528/107867328/107847449/107847729	9	107870410/107861704/107866355/107838932/107849051/107838765/107851030/107855640/107838766
sly04136	Autophagy - other	12/1660	36/4052	0.866226	0.999884	107854230/107847727/107870434/107853293/107873814/novel.1207/107854256/107840514/107870164/107878033/107863575/107867500	LOC107854230/LOC107847727/LOC107870434/LOC107853293/LOC107873814/-/LOC107854256/LOC107840514/LOC107870164/LOC107878033/LOC107863575/LOC107867500	sly:101251393/sly:544183/sly:101254295/sly:101263274/sly:101252803/sly:101253244/sly:101255009/sly:100736470/sly:101248472/sly:101257003/sly:101258340/sly:100736469	12	5	107854230/107870434/107873814/107878033/107863575	7	107847727/107853293/novel.1207/107854256/107840514/107870164/107867500
sly04070	Phosphatidylinositol signaling system	22/1660	63/4052	0.867569	0.999884	107860522/107843743/107840074/107875799/107862089/107850486/107861644/107855115/107854460/107860563/107867077/107867978/107851080/107858484/107844051/107850475/107850725/107867960/107857605/107873421/107860247/107868461	LOC107860522/LOC107843743/LOC107840074/LOC107875799/LOC107862089/LOC107850486/LOC107861644/LOC107855115/LOC107854460/LOC107860563/LOC107867077/LOC107867978/LOC107851080/LOC107858484/LOC107844051/LOC107850475/LOC107850725/LOC107867960/LOC107857605/LOC107873421/LOC107860247/LOC107868461	sly:101251639/sly:544131/sly:101245298/sly:101262819/sly:101247600/sly:101253265/sly:101246905/sly:101262422/sly:101252196/sly:101261282/sly:101247013/sly:101251739/sly:101253363/sly:101251565/sly:101243958/sly:101248349/sly:101262540/sly:101259601/sly:101253668/sly:100301920/sly:101247275/sly:101259812	22	16	107860522/107843743/107840074/107875799/107862089/107850486/107861644/107855115/107860563/107867077/107858484/107844051/107850475/107850725/107873421/107860247	6	107854460/107867978/107851080/107867960/107857605/107868461
sly00450	Selenocompound metabolism	4/1660	14/4052	0.890432	0.999884	107843811/novel.6961/107864673/107863655	LOC107843811/-/LOC107864673/LOC107863655	sly:101254347/sly:101254039/sly:101259979/sly:101263926	4	3	107843811/107864673/107863655	1	novel.6961
sly03430	Mismatch repair	12/1660	37/4052	0.891631	0.999884	107870731/107847917/107859401/107847775/107845741/107859776/107863304/107875498/107873211/107855694/107855430/107877977	LOC107870731/LOC107847917/LOC107859401/LOC107847775/LOC107845741/LOC107859776/LOC107863304/LOC107875498/LOC107873211/LOC107855694/LOC107855430/LOC107877977	sly:101259439/sly:101251472/sly:101246010/sly:101262281/sly:101262086/sly:101258812/sly:101248748/sly:544248/sly:101262116/sly:101258001/sly:100462655/sly:100462656	12	5	107847775/107859776/107863304/107875498/107855430	7	107870731/107847917/107859401/107845741/107873211/107855694/107877977
sly00051	Fructose and mannose metabolism	18/1660	54/4052	0.902286	0.999884	107875763/107861787/107862123/107840104/107870147/107870207/107876107/107863539/107875831/107839408/107877490/107858551/107845532/107840969/107845858/107843644/107878843/107859926	LOC107875763/LOC107861787/LOC107862123/LOC107840104/LOC107870147/LOC107870207/LOC107876107/LOC107863539/LOC107875831/LOC107839408/LOC107877490/LOC107858551/LOC107845532/LOC107840969/LOC107845858/LOC107843644/LOC107878843/LOC107859926	sly:544022/sly:543779/sly:101266709/sly:101253137/sly:101245938/sly:101260332/sly:543638/sly:101266704/sly:544126/sly:778245/sly:101266649/sly:101249787/sly:101248625/sly:778210/sly:101261972/sly:101262466/sly:101243907/sly:101265391	18	9	107875763/107870147/107870207/107876107/107863539/107839408/107858551/107845858/107859926	9	107861787/107862123/107840104/107875831/107877490/107845532/107840969/107843644/107878843
sly00195	Photosynthesis	18/1660	54/4052	0.902286	0.999884	107839911/107847776/107868483/107855007/107844032/107875659/107860359/107873079/107866833/107872990/107859535/107859585/107862342/107851947/107858989/13540179/13540240/19989053	LOC107839911/LOC107847776/LOC107868483/LOC107855007/LOC107844032/LOC107875659/LOC107860359/LOC107873079/LOC107866833/LOC107872990/LOC107859535/LOC107859585/LOC107862342/LOC107851947/LOC107858989/psbA/psaJ/orf353	sly:778301/sly:101259118/sly:101254454/sly:101263132/sly:101259494/sly:101252890/sly:101258321/sly:543978/sly:544053/sly:101260830/sly:543931/sly:101253342/sly:101259227/sly:101268297/sly:101245421/sly:3950408/sly:3950381/sly:3950483	18	6	107847776/107875659/107872990/13540179/13540240/19989053	12	107839911/107868483/107855007/107844032/107860359/107873079/107866833/107859535/107859585/107862342/107851947/107858989
sly00514	Other types of O-glycan biosynthesis	3/1660	4052-12-01	0.926663	0.999884	107856977/107876043/107848026	LOC107856977/LOC107876043/LOC107848026	sly:101260457/sly:101262928/sly:101260693	3	2	107856977/107876043	1	107848026
sly00909	Sesquiterpenoid and triterpenoid biosynthesis	3/1660	4052-12-01	0.926663	0.999884	107851783/107841179/107840471	LOC107851783/LOC107841179/LOC107840471	sly:101264374/sly:101262591/sly:100316899	3	3	107851783/107841179/107840471	0
sly00970	Aminoacyl-tRNA biosynthesis	17/1660	53/4052	0.930339	0.999884	novel.7231/107871447/107858954/107858183/107860455/107875750/107863740/novel.4425/107870342/107842419/107839797/novel.2727/novel.3368/107838711/107871475/novel.3743/107862107	-/LOC107871447/LOC107858954/LOC107858183/LOC107860455/LOC107875750/LOC107863740/-/LOC107870342/LOC107842419/LOC107839797/-/-/LOC107838711/LOC107871475/-/LOC107862107	sly:101263161/sly:101247618/sly:101260692/sly:543755/sly:101256769/sly:101251001/sly:101264294/sly:101263161/sly:101257430/sly:101267264/sly:101251038/sly:101247918/sly:101263161/sly:101268498/sly:101244106/sly:101263161/sly:101268375	17	8	107863740/107870342/107842419/107839797/novel.2727/107871475/novel.3743/107862107	9	novel.7231/107871447/107858954/107858183/107860455/107875750/novel.4425/novel.3368/107838711
sly03060	Protein export	12/1660	39/4052	0.930627	0.999884	107851499/107841033/107847826/107862719/107875863/107867797/107864009/107873089/107845403/107863089/107878553/107847388	LOC107851499/LOC107841033/LOC107847826/LOC107862719/LOC107875863/LOC107867797/LOC107864009/LOC107873089/LOC107845403/LOC107863089/LOC107878553/LOC107847388	sly:101254464/sly:101250277/sly:101248267/sly:101247903/sly:101243898/sly:101256051/sly:101248030/sly:101245632/sly:101259292/sly:101263797/sly:101266091/sly:101263905	12	3	107847826/107875863/107867797	9	107851499/107841033/107862719/107864009/107873089/107845403/107863089/107878553/107847388
sly00340	Histidine metabolism	4/1660	16/4052	0.944436	0.999884	107874980/107871485/107846976/107859210	LOC107874980/LOC107871485/LOC107846976/LOC107859210	sly:101262822/sly:101250407/sly:101254485/sly:101243855	4	0		4	107874980/107871485/107846976/107859210
sly00905	Brassinosteroid biosynthesis	3/1660	13/4052	0.949953	0.999884	107860427/107859954/107842109	LOC107860427/LOC107859954/LOC107842109	sly:100037489/sly:101256342/sly:101256999	3	0		3	107860427/107859954/107842109
sly03020	RNA polymerase	10/1660	35/4052	0.95522	0.999884	novel.126/107843815/107873487/107870079/107872705/107868305/107838856/107859939/107875346/novel.2383	-/LOC107843815/LOC107873487/LOC107870079/LOC107872705/LOC107868305/LOC107838856/LOC107859939/LOC107875346/-	sly:101265201/sly:101260591/sly:101259753/sly:101254374/sly:101257966/sly:101254169/sly:101261746/sly:101256904/sly:101251196/sly:778257	10	5	107843815/107873487/107872705/107838856/107859939	5	novel.126/107870079/107868305/107875346/novel.2383
sly02010	ABC transporters	5/1660	20/4052	0.957818	0.999884	107870255/107855112/107843126/107870765/107862044	LOC107870255/LOC107855112/LOC107843126/LOC107870765/LOC107862044	sly:101265632/sly:101262724/sly:101261549/sly:101247740/sly:101250391	5	2	107870255/107855112	3	107843126/107870765/107862044
sly03440	Homologous recombination	17/1660	56/4052	0.962979	0.999884	107870731/107847917/107863385/107850205/107877119/107845741/novel.111/107866877/107870689/107840440/107873211/novel.1683/107851234/107876036/107847643/107843890/107839674	LOC107870731/LOC107847917/LOC107863385/LOC107850205/LOC107877119/LOC107845741/-/LOC107866877/LOC107870689/LOC107840440/LOC107873211/-/LOC107851234/LOC107876036/LOC107847643/LOC107843890/LOC107839674	sly:101259439/sly:101251472/sly:101252104/sly:101267881/sly:544003/sly:101262086/sly:104645619/sly:101264320/sly:101266032/sly:101266874/sly:101262116/sly:101253578/sly:101261911/sly:101265551/sly:101262415/sly:101255547/sly:101268516	17	5	107877119/novel.1683/107847643/107843890/107839674	12	107870731/107847917/107863385/107850205/107845741/novel.111/107866877/107870689/107840440/107873211/107851234/107876036
sly00040	Pentose and glucuronate interconversions	23/1660	73/4052	0.964002	0.999884	107860470/107861639/107862290/107867312/107843941/107879807/107867311/107875945/107860691/107851416/107871002/107840406/107839642/107877490/107851094/107845532/107843525/107861947/107858260/107875046/107842839/107843830/107862261	LOC107860470/LOC107861639/LOC107862290/LOC107867312/LOC107843941/LOC107879807/LOC107867311/LOC107875945/LOC107860691/LOC107851416/LOC107871002/LOC107840406/LOC107839642/LOC107877490/LOC107851094/LOC107845532/LOC107843525/LOC107861947/LOC107858260/LOC107875046/LOC107842839/LOC107843830/LOC107862261	sly:101263958/sly:101245743/sly:101261402/sly:101245156/sly:101250914/sly:101263475/sly:101244576/sly:101246909/sly:101260589/sly:543587/sly:101245535/sly:101261743/sly:101260576/sly:101266649/sly:101262904/sly:101248625/sly:101263844/sly:101256371/sly:101248642/sly:101246061/sly:101256514/sly:544051/sly:101264109	23	13	107860470/107861639/107862290/107879807/107875945/107839642/107851094/107843525/107861947/107858260/107875046/107842839/107843830	10	107867312/107843941/107867311/107860691/107851416/107871002/107840406/107877490/107845532/107862261
sly00240	Pyrimidine metabolism	14/1660	50/4052	0.980312	0.999884	107840887/107844226/107864480/107855296/107875281/107861725/107879823/107862366/107875422/107859741/107878841/107852152/107850302/107847669	LOC107840887/LOC107844226/LOC107864480/LOC107855296/LOC107875281/LOC107861725/LOC107879823/LOC107862366/LOC107875422/LOC107859741/LOC107878841/LOC107852152/LOC107850302/LOC107847669	sly:101247459/sly:101243930/sly:101266563/sly:104648939/sly:101255711/sly:101263094/sly:544274/sly:101265909/sly:101259343/sly:101244545/sly:101244205/sly:101267567/sly:101252471/sly:101261880	14	7	107840887/107844226/107864480/107861725/107879823/107852152/107847669	7	107855296/107875281/107862366/107875422/107859741/107878841/107850302
sly00531	Glycosaminoglycan degradation	2/1660	4052-12-01	0.983414	0.999884	107862297/107843457	LOC107862297/LOC107843457	sly:101258638/sly:100529103	2	0		2	107862297/107843457
sly00190	Oxidative phosphorylation	30/1660	97/4052	0.984955	0.999884	107863537/107842902/107875939/107840811/107851667/107877967/107873396/107845374/107871474/107870847/107867812/107860743/107861637/107859585/19989172/107877668/107860713/107878661/107864415/107854242/19989043/107852833/107860179/107866031/107847986/107859955/107856684/107851663/107864404/107860600	LOC107863537/LOC107842902/LOC107875939/LOC107840811/LOC107851667/LOC107877967/LOC107873396/LOC107845374/LOC107871474/LOC107870847/LOC107867812/LOC107860743/LOC107861637/LOC107859585/cox2/LOC107877668/LOC107860713/LOC107878661/LOC107864415/LOC107854242/atp6/LOC107852833/LOC107860179/LOC107866031/LOC107847986/LOC107859955/LOC107856684/LOC107851663/LOC107864404/LOC107860600	sly:101258580/sly:101266444/sly:543660/sly:101247697/sly:101251020/sly:101263827/sly:101258660/sly:101245703/sly:101254490/sly:101253277/sly:101246756/sly:101248061/sly:101259414/sly:101253342/sly:101264997/sly:101249063/sly:100736507/sly:101255513/sly:101256222/sly:101258567/sly:101259827/sly:101249170/sly:101264166/sly:101247948/sly:101246346/sly:101256641/sly:101248453/sly:101268533/sly:101265…	30	14	107863537/107842902/107840811/107877967/107871474/107870847/19989172/107877668/107878661/107854242/19989043/107859955/107856684/107864404	16	107875939/107851667/107873396/107845374/107867812/107860743/107861637/107859585/107860713/107864415/107852833/107860179/107866031/107847986/107851663/107860600
sly00073	Cutin, suberine and wax biosynthesis	5/1660	23/4052	0.98509	0.999884	107857121/107848605/107862886/107844188/107876102	LOC107857121/LOC107848605/LOC107862886/LOC107844188/LOC107876102	sly:101250126/sly:101259447/sly:101257641/sly:101267934/sly:101249297	5	5	107857121/107848605/107862886/107844188/107876102	0
sly03420	Nucleotide excision repair	14/1660	55/4052	0.994787	0.999884	107852603/107870731/107847917/107870498/107847775/107873713/107863662/107859397/107875498/107873211/107847624/107870806/107858809/107858424	LOC107852603/LOC107870731/LOC107847917/LOC107870498/LOC107847775/LOC107873713/LOC107863662/LOC107859397/LOC107875498/LOC107873211/LOC107847624/LOC107870806/LOC107858809/LOC107858424	sly:101252814/sly:101259439/sly:101251472/sly:101265989/sly:101262281/sly:101255497/sly:101251406/sly:101244148/sly:544248/sly:101262116/sly:101260506/sly:101249452/sly:101260299/sly:544135	14	7	107852603/107847775/107859397/107875498/107847624/107858809/107858424	7	107870731/107847917/107870498/107873713/107863662/107873211/107870806
sly03030	DNA replication	9/1660	46/4052	0.999458	0.999884	107870731/107847917/107847775/107845741/107875498/107873211/107847624/107844063/107853571	LOC107870731/LOC107847917/LOC107847775/LOC107845741/LOC107875498/LOC107873211/LOC107847624/LOC107844063/LOC107853571	sly:101259439/sly:101251472/sly:101262281/sly:101262086/sly:544248/sly:101262116/sly:101260506/sly:101244042/sly:101243636	9	4	107847775/107875498/107847624/107844063	5	107870731/107847917/107845741/107873211/107853571
sly03050	Proteasome	7/1660	43/4052	0.999884	0.999884	107864544/107850730/107877917/107877889/novel.5979/novel.684/107867598	LOC107864544/LOC107850730/LOC107877917/LOC107877889/-/-/LOC107867598	sly:101264976/sly:101263403/sly:101248875/sly:101258384/sly:101251952/sly:101251952/sly:101263071	7	5	107850730/107877917/107877889/novel.5979/novel.684	2	107864544/107867598

## Sheet: cc2vscc0_KEGGenrich
KEGGID	Description	GeneRatio	BgRatio	pvalue	padj	geneID	geneName	keggID	Count	Up	Up_Gene_names	Down	Down_Gene_names
sly04626	Plant-pathogen interaction	35/439	149/4047	5.1947e-06	0.000372238	107860115/107872867/107860522/107872603/107843743/107842605/107845825/107875924/107862088/107843851/107843864/107874660/107861622/107861198/107877796/107842906/107850465/107854436/novel.2194/107868186/107872239/107839975/107842907/107878147/107860951/107840017/107878126/107850672/107868062/107848005/107877218/107858934/107869296/107867989/107840074	LOC107860115/LOC107872867/LOC107860522/LOC107872603/LOC107843743/LOC107842605/LOC107845825/LOC107875924/LOC107862088/LOC107843851/LOC107843864/LOC107874660/LOC107861622/LOC107861198/LOC107877796/LOC107842906/LOC107850465/LOC107854436/-/LOC107868186/LOC107872239/LOC107839975/LOC107842907/LOC107878147/LOC107860951/LOC107840017/LOC107878126/LOC107850672/LOC107868062/LOC107848005/LOC107877218/LOC1078…	sly:101256237/sly:101255501/sly:101251639/sly:544041/sly:544131/sly:101268787/sly:101256817/sly:101256979/sly:543603/sly:101266882/sly:101249692/sly:101265138/sly:543946/sly:544042/sly:101250219/sly:101266151/sly:101245185/sly:101245247/sly:101248077/sly:100316879/sly:101055516/sly:101263165/sly:544123/sly:101252097/sly:101252553/sly:100736531/sly:101254814/sly:101256827/sly:101260188/sly:1012470…	35	30	107860115/107872867/107860522/107872603/107843743/107842605/107845825/107875924/107862088/107843851/107843864/107874660/107861622/107861198/107877796/107842906/107854436/107868186/107872239/107839975/107842907/107878147/107860951/107840017/107878126/107850672/107848005/107858934/107867989/107840074	5	107850465/novel.2194/107868062/107877218/107869296
sly04075	Plant hormone signal transduction	45/439	216/4047	7.44476e-06	0.000372238	107880011/107840891/107843874/107861681/107867191/107861622/107843441/107840207/107874569/107868079/107861852/107863844/107842906/107877442/107843885/107877900/107850747/107867146/107861318/107839300/107867043/107875521/107848380/107848541/107859144/novel.2451/107865243/107873139/107861654/novel.6090/107842907/107857547/107855965/107862455/107869397/novel.5058/107869800/107861842/107840017/107851…	LOC107880011/LOC107840891/LOC107843874/LOC107861681/LOC107867191/LOC107861622/LOC107843441/LOC107840207/LOC107874569/LOC107868079/LOC107861852/LOC107863844/LOC107842906/LOC107877442/LOC107843885/LOC107877900/LOC107850747/LOC107867146/LOC107861318/LOC107839300/LOC107867043/LOC107875521/LOC107848380/LOC107848541/LOC107859144/-/LOC107865243/LOC107873139/LOC107861654/-/LOC107842907/LOC107857547/LOC10…	sly:101245895/sly:100134911/sly:101248058/sly:100301927/sly:101243703/sly:543946/sly:101250944/sly:101246970/sly:101055542/sly:101267832/sly:101055548/sly:543540/sly:101266151/sly:101255313/sly:101247174/sly:101247936/sly:101261048/sly:101262109/sly:101256828/sly:101255336/sly:101250688/sly:101244003/sly:101244285/sly:101247526/sly:101265701/sly:101260773/sly:100316895/sly:101255303/sly:543881/sl…	45	26	107840891/107861681/107861622/107843441/107840207/107874569/107868079/107861852/107863844/107842906/107877442/107877900/107850747/107839300/107867043/107848541/107865243/novel.6090/107842907/107855965/107862455/novel.5058/107840017/107851395/107855162/107870506	19	107880011/107843874/107867191/107843885/107867146/107861318/107875521/107848380/107859144/novel.2451/107873139/107861654/107857547/107869397/107869800/107861842/107840321/107867653/107859475
sly04016	MAPK signaling pathway - plant	28/439	133/4047	0.000350891	0.0116964	107872867/107860522/107843743/107842605/107862088/107873437/107864513/107861622/107843441/107869622/107842906/107859787/107850747/107875521/107862854/107865243/107839975/107842907/novel.1313/107855965/107840017/107851395/107840321/107858934/107872955/107853534/107867989/107840074	LOC107872867/LOC107860522/LOC107843743/LOC107842605/LOC107862088/LOC107873437/LOC107864513/LOC107861622/LOC107843441/LOC107869622/LOC107842906/LOC107859787/LOC107850747/LOC107875521/LOC107862854/LOC107865243/LOC107839975/LOC107842907/-/LOC107855965/LOC107840017/LOC107851395/LOC107840321/LOC107858934/LOC107872955/LOC107853534/LOC107867989/LOC107840074	sly:101255501/sly:101251639/sly:544131/sly:101268787/sly:543603/sly:543880/sly:101246650/sly:543946/sly:101250944/sly:104647127/sly:101266151/sly:543585/sly:101261048/sly:101244003/sly:543948/sly:100316895/sly:101263165/sly:544123/sly:544148/sly:101249794/sly:100736531/sly:101258886/sly:101268620/sly:101260980/sly:101249467/sly:101254919/sly:101258272/sly:101245298	28	24	107872867/107860522/107843743/107842605/107862088/107873437/107864513/107861622/107843441/107869622/107842906/107850747/107862854/107865243/107839975/107842907/107855965/107840017/107851395/107858934/107872955/107853534/107867989/107840074	4	107859787/107875521/novel.1313/107840321
sly00360	Phenylalanine metabolism	14/439	49/4047	0.000477116	0.0119279	107879725/107854291/107843092/107848433/107862076/107860278/107875407/107843343/107862932/107863937/107848444/107851006/107845345/107842494	LOC107879725/LOC107854291/LOC107843092/LOC107848433/LOC107862076/LOC107860278/LOC107875407/LOC107843343/LOC107862932/LOC107863937/LOC107848444/LOC107851006/LOC107845345/LOC107842494	sly:778254/sly:101243656/sly:101243922/sly:101249664/sly:101249624/sly:101265690/sly:101244196/sly:104644402/sly:101251363/sly:101249824/sly:778256/sly:100736464/sly:101264863/sly:101244707	14	11	107879725/107854291/107843092/107848433/107862076/107860278/107875407/107862932/107863937/107848444/107851006	3	107843343/107845345/107842494
sly00520	Amino sugar and nucleotide sugar metabolism	22/439	106/4047	0.0018107	0.0362141	107877663/107854073/107840845/107859000/107864032/107878151/107854241/107845431/107875632/107864663/107856611/107839422/107840421/107862290/107865562/107878072/107850846/107862761/107851333/107854571/107871848/107840015	LOC107877663/LOC107854073/LOC107840845/LOC107859000/LOC107864032/LOC107878151/LOC107854241/LOC107845431/LOC107875632/LOC107864663/LOC107856611/LOC107839422/LOC107840421/LOC107862290/LOC107865562/LOC107878072/LOC107850846/LOC107862761/LOC107851333/LOC107854571/LOC107871848/LOC107840015	sly:101257483/sly:101258487/sly:101251855/sly:101267862/sly:101246662/sly:101246311/sly:101257677/sly:101260709/sly:101244155/sly:100316874/sly:101258640/sly:100316902/sly:544283/sly:101261402/sly:101266745/sly:101253205/sly:101265535/sly:101257145/sly:101248179/sly:101262269/sly:101245341/sly:543515	22	15	107877663/107854073/107840845/107859000/107864032/107854241/107845431/107875632/107840421/107862290/107878072/107850846/107862761/107851333/107854571	7	107878151/107864663/107856611/107839422/107865562/107871848/107840015
sly00730	Thiamine metabolism	7/439	19/4047	0.00265206	0.0442009	107856341/107850729/107842524/107859361/107850768/107860754/107873461	LOC107856341/LOC107850729/LOC107842524/LOC107859361/LOC107850768/LOC107860754/LOC107873461	sly:101257192/sly:101254478/sly:101246176/sly:101247277/sly:101251053/sly:101246297/sly:101264726	7	5	107856341/107850729/107842524/107850768/107860754	2	107859361/107873461
sly00053	Ascorbate and aldarate metabolism	9/439	38/4047	0.0177244	0.237082	107878151/107873361/107873435/107864663/107839422/107862290/107875751/107868078/107870111	LOC107878151/LOC107873361/LOC107873435/LOC107864663/LOC107839422/LOC107862290/LOC107875751/LOC107868078/LOC107870111	sly:101246311/sly:778229/sly:778224/sly:100316874/sly:100316902/sly:101261402/sly:101055572/sly:778341/sly:544280	9	3	107873435/107862290/107875751	6	107878151/107873361/107864663/107839422/107868078/107870111
sly01230	Biosynthesis of amino acids	33/439	212/4047	0.0189665	0.237082	107875636/107842110/107867463/novel.5223/novel.4074/107839203/107860120/107845682/107873413/107848022/107850602/novel.5432/107870519/107845759/107845282/107848320/107867550/107862261/107843197/107870413/107867374/107869328/107873029/107859905/107859795/107860178/107851006/107861704/107854836/107877384/107845345/107870781/107840161	LOC107875636/LOC107842110/LOC107867463/-/-/LOC107839203/LOC107860120/LOC107845682/LOC107873413/LOC107848022/LOC107850602/-/LOC107870519/LOC107845759/LOC107845282/LOC107848320/LOC107867550/LOC107862261/LOC107843197/LOC107870413/LOC107867374/LOC107869328/LOC107873029/LOC107859905/LOC107859795/LOC107860178/LOC107851006/LOC107861704/LOC107854836/LOC107877384/LOC107845345/LOC107870781/LOC107840161	sly:101247331/sly:101259361/sly:544153/sly:101251709/sly:101253321/sly:101255033/sly:101254439/sly:101256422/sly:543875/sly:101267891/sly:101247506/sly:101245890/sly:544275/sly:101245503/sly:101256813/sly:101247693/sly:101247124/sly:101264109/sly:544068/sly:101250010/sly:101255089/sly:101263236/sly:543977/sly:101250853/sly:101253647/sly:101264475/sly:100736464/sly:101260521/sly:101254617/sly:1012…	33	21	107875636/107842110/107867463/107845682/107848022/107850602/107870519/107845282/107848320/107867550/107843197/107870413/107867374/107869328/107873029/107859905/107859795/107860178/107851006/107877384/107840161	12	novel.5223/novel.4074/107839203/107860120/107873413/novel.5432/107845759/107862261/107861704/107854836/107845345/107870781
sly00250	Alanine, aspartate and glutamate metabolism	9/439	40/4047	0.0244808	0.272008	107854073/107873413/107848022/107857603/107838791/107870519/107850292/107850578/107867374	LOC107854073/LOC107873413/LOC107848022/LOC107857603/LOC107838791/LOC107870519/LOC107850292/LOC107850578/LOC107867374	sly:101258487/sly:543875/sly:101267891/sly:101253148/sly:101259235/sly:544275/sly:101055519/sly:100147722/sly:101255089	9	6	107854073/107848022/107838791/107870519/107850578/107867374	3	107873413/107857603/107850292
sly00400	Phenylalanine, tyrosine and tryptophan biosynthesis	9/439	43/4047	0.0377691	0.338205	107875636/107842110/107867463/107845682/107848320/107873029/107851006/107845345/107870781	LOC107875636/LOC107842110/LOC107867463/LOC107845682/LOC107848320/LOC107873029/LOC107851006/LOC107845345/LOC107870781	sly:101247331/sly:101259361/sly:544153/sly:101256422/sly:101247693/sly:543977/sly:100736464/sly:101264863/sly:101265030	9	7	107875636/107842110/107867463/107845682/107848320/107873029/107851006	2	107845345/107870781
sly04070	Phosphatidylinositol signaling system	12/439	64/4047	0.0396426	0.338205	107860522/107843743/107875799/107867306/107851383/107871226/107873421/107850811/107870111/107855115/107867989/107840074	LOC107860522/LOC107843743/LOC107875799/LOC107867306/LOC107851383/LOC107871226/LOC107873421/LOC107850811/LOC107870111/LOC107855115/LOC107867989/LOC107840074	sly:101251639/sly:544131/sly:101262819/sly:101246342/sly:101243786/sly:101255650/sly:100301920/sly:101255550/sly:544280/sly:101262422/sly:101258272/sly:101245298	12	10	107860522/107843743/107875799/107867306/107851383/107873421/107850811/107855115/107867989/107840074	2	107871226/107870111
sly00940	Phenylpropanoid biosynthesis	18/439	108/4047	0.0405847	0.338205	107854291/107843092/107840027/107839366/107862076/107860278/107875407/107861887/107859563/107862991/107862932/107863937/107860206/107868752/107874093/107871140/107860047/107874082	LOC107854291/LOC107843092/LOC107840027/LOC107839366/LOC107862076/LOC107860278/LOC107875407/LOC107861887/LOC107859563/LOC107862991/LOC107862932/LOC107863937/LOC107860206/LOC107868752/LOC107874093/LOC107871140/LOC107860047/LOC107874082	sly:101243656/sly:101243922/sly:544293/sly:101246092/sly:101249624/sly:101265690/sly:101244196/sly:101254287/sly:101257526/sly:101251452/sly:101251363/sly:101249824/sly:101257228/sly:101253377/sly:544084/sly:101264425/sly:101254970/sly:101261260	18	17	107854291/107843092/107840027/107839366/107862076/107860278/107875407/107861887/107859563/107862991/107862932/107863937/107860206/107868752/107874093/107871140/107874082	1	107860047
sly00500	Starch and sucrose metabolism	19/439	117/4047	0.04544	0.349539	107863475/107843684/107864541/107859563/107838770/107867836/107864313/107869091/107840883/107840421/107866823/107867323/107859646/107877529/107852961/107839778/107842585/107863145/107860137	LOC107863475/LOC107843684/LOC107864541/LOC107859563/LOC107838770/LOC107867836/LOC107864313/LOC107869091/LOC107840883/LOC107840421/LOC107866823/LOC107867323/LOC107859646/LOC107877529/LOC107852961/LOC107839778/LOC107842585/LOC107863145/LOC107860137	sly:101259777/sly:543502/sly:100736451/sly:101257526/sly:101259279/sly:101254670/sly:101055573/sly:101253815/sly:543961/sly:544283/sly:101250886/sly:778304/sly:101266782/sly:100135703/sly:101247621/sly:544032/sly:101244113/sly:101250960/sly:101249596	19	13	107863475/107843684/107864541/107859563/107867836/107840883/107840421/107866823/107867323/107852961/107842585/107863145/107860137	6	107838770/107864313/107869091/107859646/107877529/107839778
sly01200	Carbon metabolism	34/439	240/4047	0.0587862	0.38267	novel.5398/107840119/107839203/107860120/107862248/107869777/107859787/107867663/107847268/107850292/novel.946/107845759/107851146/107845282/107867550/novel.5863/107844759/107842812/107862261/107842329/107843197/107850433/107870413/107869328/107859905/107844405/107871105/107853311/107859795/107854836/107877384/107859603/107847937/107840161	-/LOC107840119/LOC107839203/LOC107860120/LOC107862248/LOC107869777/LOC107859787/LOC107867663/LOC107847268/LOC107850292/-/LOC107845759/LOC107851146/LOC107845282/LOC107867550/-/LOC107844759/LOC107842812/LOC107862261/LOC107842329/LOC107843197/LOC107850433/LO	sly:543522/sly:778286/sly:101255033/sly:101254439/sly:101258932/sly:101255322/sly:543585/sly:101266629/sly:101246511/sly:101055519/sly:101258424/sly:101245503/sly:101249445/sly:101256813/sly:101247124/sly:101257857/sly:778330/sly:101260852/sly:101264109/sly:101263879/sly:544068/sly:101260070/sly:101250010/sly:101263236/sly:101250853/sly:101264273/sly:100316873/sly:101259749/sly:101253647/sly:1012…	34	13	107862248/107845282/107867550/107842329/107843197/107870413/107869328/107859905/107853311/107859795/107877384/107847937/107840161	21	novel.5398/107840119/107839203/107860120/107869777/107859787/107867663/107847268/107850292/novel.946/107845759/107851146/novel.5863/107844759/107842812/107862261/107850433/107844405/107871105/107854836/107859603
sly00480	Glutathione metabolism	14/439	83/4047	0.0606338	0.38267	107866830/107864929/107873717/107842864/107858803/107873361/107873435/107861040/107854335/107859660/107875145/novel.834/107868078/107852922	LOC107866830/LOC107864929/LOC107873717/LOC107842864/LOC107858803/LOC107873361/LOC107873435/LOC107861040/LOC107854335/LOC107859660/LOC107875145/-/LOC107868078/LOC107852922	sly:544209/sly:544197/sly:101256384/sly:101266750/sly:101268216/sly:778229/sly:778224/sly:101267923/sly:101248761/sly:101263072/sly:101268500/sly:101261142/sly:778341/sly:101266084	14	11	107866830/107864929/107873717/107842864/107858803/107873435/107861040/107854335/107859660/107875145/107852922	3	107873361/novel.834/107868078
sly04712	Circadian rhythm - plant	8/439	40/4047	0.0615582	0.38267	107845418/107862999/107850365/107850670/107850219/107849675/107838759/107878104	LOC107845418/LOC107862999/LOC107850365/LOC107850670/LOC107850219/LOC107849675/LOC107838759/LOC107878104	sly:101262866/sly:101250283/sly:101258346/sly:101249698/sly:101254785/sly:101259391/sly:101256908/sly:101259349	8	7	107845418/107862999/107850365/107850670/107850219/107838759/107878104	1	107849675
sly00710	Carbon fixation in photosynthetic organisms	12/439	69/4047	0.065054	0.38267	107840119/107862248/107869777/107867663/107851146/107845282/107844759/107842812/107862261/107859905/107844405/107871105	LOC107840119/LOC107862248/LOC107869777/LOC107867663/LOC107851146/LOC107845282/LOC107844759/LOC107842812/LOC107862261/LOC107859905/LOC107844405/LOC107871105	sly:778286/sly:101258932/sly:101255322/sly:101266629/sly:101249445/sly:101256813/sly:778330/sly:101260852/sly:101264109/sly:101250853/sly:101264273/sly:100316873	12	3	107862248/107845282/107859905	9	107840119/107869777/107867663/107851146/107844759/107842812/107862261/107844405/107871105
sly00908	Zeatin biosynthesis	6/439	28/4047	0.0752412	0.406778	107847679/107843843/107853864/107838882/novel.2497/107854914	LOC107847679/LOC107843843/LOC107853864/LOC107838882/-/LOC107854914	sly:101268254/sly:101246295/sly:101263304/sly:101258827/sly:101259234/sly:100874537	6	3	107847679/107843843/107854914	3	107853864/107838882/novel.2497
sly00270	Cysteine and methionine metabolism	14/439	86/4047	0.0772878	0.406778	107853805/107864513/107840119/107842189/107839203/107862248/107850602/107845759/107844759/107864144/107863655/107854836/107847415/107845345	LOC107853805/LOC107864513/LOC107840119/LOC107842189/LOC107839203/LOC107862248/LOC107850602/LOC107845759/LOC107844759/LOC107864144/LOC107863655/LOC107854836/LOC107847415/LOC107845345	sly:544052/sly:101246650/sly:778286/sly:101251255/sly:101255033/sly:101258932/sly:101247506/sly:101245503/sly:778330/sly:101251816/sly:101263926/sly:101254617/sly:100134880/sly:101264863	14	6	107853805/107864513/107842189/107862248/107850602/107847415	8	107840119/107839203/107845759/107844759/107864144/107863655/107854836/107845345
sly00592	alpha-Linolenic acid metabolism	7/439	36/4047	0.0879951	0.439975	107861665/107842456/107854684/107877738/107850386/107867080/107843433	LOC107861665/LOC107842456/LOC107854684/LOC107877738/LOC107850386/LOC107867080/LOC107843433	sly:544009/sly:101262853/sly:544306/sly:543763/sly:101251665/sly:606711/sly:101250354	7	6	107861665/107842456/107854684/107877738/107850386/107867080	1	107843433
sly00904	Diterpenoid biosynthesis	5/439	23/4047	0.0957291	0.455853	107863880/107840383/107861129/107861895/107852040	LOC107863880/LOC107840383/LOC107861129/LOC107861895/LOC107852040	sly:101246085/sly:100134888/sly:101249786/sly:543504/sly:100037505	5	4	107863880/107840383/107861129/107861895	1	107852040
sly00910	Nitrogen metabolism	5/439	24/4047	0.110709	0.491057	107870519/107852264/107847814/107855211/107875607	LOC107870519/LOC107852264/LOC107847814/LOC107855211/LOC107875607	sly:544275/sly:101246028/sly:543802/sly:101268239/sly:101259260	5	3	107870519/107855211/107875607	2	107852264/107847814
sly00630	Glyoxylate and dicarboxylate metabolism	11/439	68/4047	0.112943	0.491057	107858887/107840119/107860120/107862248/107859787/107870519/107850292/107844759/107852264/107850433/107859603	LOC107858887/LOC107840119/LOC107860120/LOC107862248/LOC107859787/LOC107870519/LOC107850292/LOC107844759/LOC107852264/LOC107850433/LOC107859603	sly:101251259/sly:778286/sly:101254439/sly:101258932/sly:543585/sly:544275/sly:101055519/sly:778330/sly:101246028/sly:101260070/sly:101249137	11	3	107858887/107862248/107870519	8	107840119/107860120/107859787/107850292/107844759/107852264/107850433/107859603
sly00195	Photosynthesis	9/439	55/4047	0.135594	0.564973	107868483/107878908/107859585/107859876/107863280/13540179/107839911/107846834/107844032	LOC107868483/LOC107878908/LOC107859585/LOC107859876/LOC107863280/psbA/LOC107839911/LOC107846834/LOC107844032	sly:101254454/sly:778297/sly:101253342/sly:101261284/sly:101243864/sly:3950408/sly:778301/sly:101245163/sly:101259494	9	1	13540179	8	107868483/107878908/107859585/107859876/107863280/107839911/107846834/107844032
sly00920	Sulfur metabolism	5/439	30/4047	0.220348	0.862209	107859432/107839203/107858434/107845759/107854836	LOC107859432/LOC107839203/LOC107858434/LOC107845759/LOC107854836	sly:101259503/sly:101255033/sly:101257319/sly:101245503/sly:101254617	5	1	107859432	4	107839203/107858434/107845759/107854836
sly00052	Galactose metabolism	7/439	46/4047	0.226502	0.862209	107859925/107843684/107839109/107865562/107867323/107851333/107840322	LOC107859925/LOC107843684/LOC107839109/LOC107865562/LOC107867323/LOC107851333/LOC107840322	sly:100316891/sly:543502/sly:544236/sly:101266745/sly:778304/sly:101248179/sly:101263843	7	5	107859925/107843684/107867323/107851333/107840322	2	107839109/107865562
sly00906	Carotenoid biosynthesis	5/439	31/4047	0.241185	0.862209	107850059/107852027/107873401/107868281/107851558	LOC107850059/LOC107852027/LOC107873401/LOC107868281/LOC107851558	sly:101249565/sly:544163/sly:544133/sly:543988/sly:101267857	5	3	107850059/107852027/107868281	2	107873401/107851558
sly00280	Valine, leucine and isoleucine degradation	7/439	47/4047	0.243313	0.862209	107842456/107847843/107840271/107841325/107857412/107842329/107839576	LOC107842456/LOC107847843/LOC107840271/LOC107841325/LOC107857412/LOC107842329/LOC107839576	sly:101262853/sly:101252846/sly:101262668/sly:543993/sly:100134904/sly:101263879/sly:101245206	7	3	107842456/107857412/107842329	4	107847843/107840271/107841325/107839576
sly00561	Glycerolipid metabolism	10/439	72/4047	0.25004	0.862209	107878499/107858867/107872465/107877723/107851383/107862846/107856389/107850590/107861698/107855115	LOC107878499/LOC107858867/LOC107872465/LOC107877723/LOC107851383/LOC107862846/LOC107856389/LOC107850590/LOC107861698/LOC107855115	sly:101247838/sly:101245720/sly:101257361/sly:101259856/sly:101243786/sly:101249534/sly:101267419/sly:101251763/sly:101259322/sly:101262422	10	7	107878499/107858867/107872465/107877723/107851383/107862846/107855115	3	107856389/107850590/107861698
sly00900	Terpenoid backbone biosynthesis	7/439	49/4047	0.278025	0.883023	107863738/107857412/107867046/107872939/107850614/107850768/107850997	LOC107863738/LOC107857412/LOC107867046/LOC107872939/LOC107850614/LOC107850768/LOC107850997	sly:543552/sly:100134904/sly:778360/sly:101250227/sly:101250000/sly:101251053/sly:100134900	7	6	107863738/107857412/107867046/107872939/107850768/107850997	1	107850614
sly00230	Purine metabolism	11/439	84/4047	0.299611	0.883023	107861661/107850729/107857603/107870413/107865390/107869328/107860754/107851217/107857653/107877384/107840161	LOC107861661/LOC107850729/LOC107857603/LOC107870413/LOC107865390/LOC107869328/LOC107860754/LOC107851217/LOC107857653/LOC107877384/LOC107840161	sly:101251456/sly:101254478/sly:101253148/sly:101250010/sly:101256508/sly:101263236/sly:101246297/sly:101250287/sly:101246321/sly:101265671/sly:101259587	11	7	107861661/107850729/107870413/107869328/107860754/107877384/107840161	4	107857603/107865390/107851217/107857653
sly00020	Citrate cycle (TCA cycle)	7/439	51/4047	0.313887	0.883023	107840119/107843004/107862248/107844759/107853311/107859795/107847937	LOC107840119/LOC107843004/LOC107862248/LOC107844759/LOC107853311/LOC107859795/LOC107847937	sly:778286/sly:101246135/sly:101258932/sly:778330/sly:101259749/sly:101253647/sly:101254693	7	5	107843004/107862248/107853311/107859795/107847937	2	107840119/107844759
sly00062	Fatty acid elongation	5/439	36/4047	0.351129	0.883023	107872813/107839065/107864657/107858717/107845580	LOC107872813/LOC107839065/LOC107864657/LOC107858717/LOC107845580	sly:101246151/sly:101244691/sly:101262858/sly:101248828/sly:101268230	5	5	107872813/107839065/107864657/107858717/107845580	0
sly00562	Inositol phosphate metabolism	8/439	63/4047	0.374592	0.883023	107875799/107867306/107871226/107873421/107850683/107850811/107870111/107861649	LOC107875799/LOC107867306/LOC107871226/LOC107873421/LOC107850683/LOC107850811/LOC107870111/LOC107861649	sly:101262819/sly:101246342/sly:101255650/sly:100301920/sly:544226/sly:101255550/sly:544280/sly:101248857	8	6	107875799/107867306/107873421/107850683/107850811/107861649	2	107871226/107870111
sly00430	Taurine and hypotaurine metabolism	2/439	4047-12-01	0.379882	0.883023	107838791/107850578	LOC107838791/LOC107850578	sly:101259235/sly:100147722	2	2	107838791/107850578	0
sly00750	Vitamin B6 metabolism	2/439	4047-12-01	0.379882	0.883023	107863057/107861704	LOC107863057/LOC107861704	sly:101244752/sly:101260521	2	0		2	107863057/107861704
sly00970	Aminoacyl-tRNA biosynthesis	6/439	46/4047	0.381836	0.883023	novel.2727/107877813/107880061/107860455/107878157/107840658	-/LOC107877813/LOC107880061/LOC107860455/LOC107878157/LOC107840658	sly:101247918/sly:101255211/sly:101243628/sly:101256769/sly:101249471/sly:101259201	6	1	novel.2727	5	107877813/107880061/107860455/107878157/107840658
sly00380	Tryptophan metabolism	4/439	29/4047	0.387113	0.883023	107859787/107843343/107853311/107842494	LOC107859787/LOC107843343/LOC107853311/LOC107842494	sly:543585/sly:104644402/sly:101259749/sly:101244707	4	1	107853311	3	107859787/107843343/107842494
sly00010	Glycolysis / Gluconeogenesis	13/439	108/4047	0.38882	0.883023	107867663/107847268/107845282/107867550/107842812/107843197/107870413/107869328/107859905/107844405/107877384/107847937/107840161	LOC107867663/LOC107847268/LOC107845282/LOC107867550/LOC107842812/LOC107843197/LOC107870413/LOC107869328/LOC107859905/LOC107844405/LOC107877384/LOC107847937/LOC107840161	sly:101266629/sly:101246511/sly:101256813/sly:101247124/sly:101260852/sly:544068/sly:101250010/sly:101263236/sly:101250853/sly:101264273/sly:101265671/sly:101254693/sly:101259587	13	9	107845282/107867550/107843197/107870413/107869328/107859905/107877384/107847937/107840161	4	107867663/107847268/107842812/107844405
sly00945	Stilbenoid, diarylheptanoid and gingerol biosynthesis	3/439	21/4047	0.402343	0.883023	107839366/107860278/107875407	LOC107839366/LOC107860278/LOC107875407	sly:101246092/sly:101265690/sly:101244196	3	3	107839366/107860278/107875407	0
sly00950	Isoquinoline alkaloid biosynthesis	3/439	21/4047	0.402343	0.883023	107851006/107845345/107842494	LOC107851006/LOC107845345/LOC107842494	sly:100736464/sly:101264863/sly:101244707	3	1	107851006	2	107845345/107842494
sly00220	Arginine biosynthesis	4/439	30/4047	0.412769	0.883023	107848022/107870519/107867374/107860178	LOC107848022/LOC107870519/LOC107867374/LOC107860178	sly:101267891/sly:544275/sly:101255089/sly:101264475	4	4	107848022/107870519/107867374/107860178	0
sly00130	Ubiquinone and other terpenoid-quinone biosynthesis	5/439	39/4047	0.418668	0.883023	107862076/107875407/107859398/107862932/107845345	LOC107862076/LOC107875407/LOC107859398/LOC107862932/LOC107845345	sly:101249624/sly:101244196/sly:101245223/sly:101251363/sly:101264863	5	3	107862076/107875407/107862932	2	107859398/107845345
sly00350	Tyrosine metabolism	5/439	39/4047	0.418668	0.883023	107847268/107879874/107851006/107845345/107842494	LOC107847268/LOC107879874/LOC107851006/LOC107845345/LOC107842494	sly:101246511/sly:101258990/sly:100736464/sly:101264863/sly:101244707	5	2	107879874/107851006	3	107847268/107845345/107842494
sly03060	Protein export	5/439	39/4047	0.418668	0.883023	107847655/107863089/107847826/107840647/107875863	LOC107847655/LOC107863089/LOC107847826/LOC107840647/LOC107875863	sly:101257139/sly:101263797/sly:101248267/sly:101250048/sly:101243898	5	3	107863089/107847826/107875863	2	107847655/107840647
sly00591	Linoleic acid metabolism	2/439	13/4047	0.419883	0.883023	107861665/107865522	LOC107861665/LOC107865522	sly:544009/sly:101257007	2	2	107861665/107865522	0
sly00330	Arginine and proline metabolism	6/439	48/4047	0.422337	0.883023	107866830/107859655/107840486/107843343/107860213/107847415	LOC107866830/LOC107859655/LOC107840486/LOC107843343/LOC107860213/LOC107847415	sly:544209/sly:101264170/sly:543960/sly:104644402/sly:101254254/sly:100134880	6	5	107866830/107859655/107840486/107860213/107847415	1	107843343
sly00620	Pyruvate metabolism	10/439	84/4047	0.428065	0.883023	107840119/107862248/107844759/107850244/107870413/107869328/novel.1199/107877384/107847937/107840161	LOC107840119/LOC107862248/LOC107844759/LOC107850244/LOC107870413/LOC107869328/-/LOC107877384/LOC107847937/LOC107840161	sly:778286/sly:101258932/sly:778330/sly:101250973/sly:101250010/sly:101263236/sly:101262949/sly:101265671/sly:101254693/sly:101259587	10	7	107862248/107850244/107870413/107869328/107877384/107847937/107840161	3	107840119/107844759/novel.1199
sly00650	Butanoate metabolism	3/439	22/4047	0.432681	0.883023	107838791/107857412/107850578	LOC107838791/LOC107857412/LOC107850578	sly:101259235/sly:100134904/sly:100147722	3	3	107838791/107857412/107850578	0
sly00590	Arachidonic acid metabolism	2/439	14/4047	0.458523	0.917046	107866862/107864929	LOC107866862/LOC107864929	sly:101268179/sly:544197	2	2	107866862/107864929	0
sly00260	Glycine, serine and threonine metabolism	7/439	60/4047	0.479878	0.940938	107860120/107845682/107850292/107867550/107850433/107861704/107859603	LOC107860120/LOC107845682/LOC107850292/LOC107867550/LOC107850433/LOC107861704/LOC107859603	sly:101254439/sly:101256422/sly:101055519/sly:101247124/sly:101260070/sly:101260521/sly:101249137	7	2	107845682/107867550	5	107860120/107850292/107850433/107861704/107859603
sly04144	Endocytosis	16/439	144/4047	0.499795	0.961145	107861758/107840559/107853717/107847805/107870215/107875543/107860039/107851820/107840494/107839862/107875128/107862121/107866274/107859845/107870749/107877979	LOC107861758/LOC107840559/LOC107853717/LOC107847805/LOC107870215/LOC107875543/LOC107860039/LOC107851820/LOC107840494/LOC107839862/LOC107875128/LOC107862121/LOC107866274/LOC107859845/LOC107870749/LOC107877979	sly:101247200/sly:101263355/sly:101248300/sly:101258366/sly:101055596/sly:100736433/sly:101246301/sly:101258647/sly:101265874/sly:101265681/sly:101260383/sly:101246911/sly:544181/sly:101250180/sly:101266058/sly:101265657	16	10	107861758/107840559/107847805/107870215/107875543/107860039/107840494/107866274/107859845/107877979	6	107853717/107851820/107839862/107875128/107862121/107870749
sly01040	Biosynthesis of unsaturated fatty acids	2/439	16/4047	0.531071	1	107842456/107843433	LOC107842456/LOC107843433	sly:101262853/sly:101250354	2	1	107842456	1	107843433
sly00030	Pentose phosphate pathway	5/439	46/4047	0.568718	1	107867663/107842812/107862261/107859905/107844405	LOC107867663/LOC107842812/LOC107862261/LOC107859905/LOC107844405	sly:101266629/sly:101260852/sly:101264109/sly:101250853/sly:101264273	5	1	107859905	4	107867663/107842812/107862261/107844405
sly00670	One carbon pool by folate	2/439	18/4047	0.596713	1	107860120/107859603	LOC107860120/LOC107859603	sly:101254439/sly:101249137	2	0		2	107860120/107859603
sly00410	beta-Alanine metabolism	4/439	38/4047	0.603216	1	107859655/107838791/107850578/107842329	LOC107859655/LOC107838791/LOC107850578/LOC107842329	sly:101264170/sly:101259235/sly:100147722/sly:101263879	4	4	107859655/107838791/107850578/107842329	0
sly00460	Cyanoamino acid metabolism	3/439	29/4047	0.623549	1	107839203/107860120/107859563	LOC107839203/LOC107860120/LOC107859563	sly:101255033/sly:101254439/sly:101257526	3	1	107859563	2	107839203/107860120
sly00760	Nicotinate and nicotinamide metabolism	2/439	19/4047	0.626857	1	107874740/107870650	LOC107874740/LOC107870650	sly:101263635/sly:101255294	2	1	107874740	1	107870650
sly00941	Flavonoid biosynthesis	3/439	30/4047	0.646969	1	107839366/107860278/107875407	LOC107839366/LOC107860278/LOC107875407	sly:101246092/sly:101265690/sly:101244196	3	3	107839366/107860278/107875407	0
sly00564	Glycerophospholipid metabolism	9/439	91/4047	0.667439	1	107878499/107872465/107854912/107851383/107856389/107860821/107866274/107842339/107855115	LOC107878499/LOC107872465/LOC107854912/LOC107851383/LOC107856389/LOC107860821/LOC107866274/LOC107842339/LOC107855115	sly:101247838/sly:101257361/sly:101264154/sly:101243786/sly:101267419/sly:101261081/sly:544181/sly:101261489/sly:101262422	9	7	107878499/107872465/107854912/107851383/107860821/107866274/107855115	2	107856389/107842339
sly00770	Pantothenate and CoA biosynthesis	2/439	21/4047	0.681842	1	107852132/107847900	LOC107852132/LOC107847900	sly:101267963/sly:778322	2	1	107847900	1	107852132
sly00790	Folate biosynthesis	2/439	21/4047	0.681842	1	107840068/107854219	LOC107840068/LOC107854219	sly:544238/sly:101250507	2	1	107840068	1	107854219
sly04122	Sulfur relay system	1/439	4047-10-01	0.68323	1	107859361	LOC107859361	sly:101247277	1	0		1	107859361
sly00310	Lysine degradation	3/439	32/4047	0.690655	1	107877934/novel.511/107853311	LOC107877934/-/LOC107853311	sly:101261722/sly:101245641/sly:101259749	3	1	107853311	2	107877934/novel.511
sly00051	Fructose and mannose metabolism	5/439	53/4047	0.696211	1	107867663/107856611/107842812/107859905/107844405	LOC107867663/LOC107856611/LOC107842812/LOC107859905/LOC107844405	sly:101266629/sly:101258640/sly:101260852/sly:101250853/sly:101264273	5	1	107859905	4	107867663/107856611/107842812/107844405
sly00905	Brassinosteroid biosynthesis	1/439	4047-11-01	0.717676	1	107860427	LOC107860427	sly:100037489	1	0		1	107860427
sly00860	Porphyrin and chlorophyll metabolism	4/439	44/4047	0.718675	1	107838934/107870073/107855028/107840658	LOC107838934/LOC107870073/LOC107855028/LOC107840658	sly:101248153/sly:101244176/sly:543647/sly:101259201	4	1	107838934	3	107870073/107855028/107840658
sly04130	SNARE interactions in vesicular transport	3/439	34/4047	0.730155	1	107843713/107846179/107852786	LOC107843713/LOC107846179/LOC107852786	sly:101247381/sly:101262338/sly:101251106	3	2	107843713/107846179	1	107852786
sly00514	Other types of O-glycan biosynthesis	1/439	4047-12-01	0.748385	1	107867033	LOC107867033	sly:101253890	1	1	107867033	0
sly00071	Fatty acid degradation	4/439	46/4047	0.751151	1	107842456/107847268/107873287/107843433	LOC107842456/LOC107847268/LOC107873287/LOC107843433	sly:101262853/sly:101246511/sly:101256710/sly:101250354	4	1	107842456	3	107847268/107873287/107843433
sly04146	Peroxisome	7/439	79/4047	0.769136	1	107842456/107842480/107878690/107859787/107850292/novel.6665/107843433	LOC107842456/LOC107842480/LOC107878690/LOC107859787/LOC107850292/-/LOC107843433	sly:101262853/sly:544054/sly:101247444/sly:543585/sly:101055519/sly:101252586/sly:101250354	7	2	107842456/107842480	5	107878690/107859787/107850292/novel.6665/107843433
sly00740	Riboflavin metabolism	1/439	13/4047	0.77576	1	107840068	LOC107840068	sly:544238	1	1	107840068	0
sly04141	Protein processing in endoplasmic reticulum	16/439	176/4047	0.811792	1	107845380/107838718/107859097/107873433/107870215/107875543/107863089/107847826/107839862/107869421/107878126/107875863/107843113/107861257/107872999/107875274	LOC107845380/LOC107838718/LOC107859097/LOC107873433/LOC107870215/LOC107875543/LOC107863089/LOC107847826/LOC107839862/LOC107869421/LOC107878126/LOC107875863/LOC107843113/LOC107861257/LOC107872999/LOC107875274	sly:101260872/sly:101250440/sly:101247183/sly:101257158/sly:101055596/sly:100736433/sly:101263797/sly:101248267/sly:101265681/sly:101257163/sly:101254814/sly:101243898/sly:101266255/sly:101256444/sly:101262222/sly:101253501	16	12	107845380/107838718/107870215/107875543/107863089/107847826/107869421/107878126/107875863/107843113/107861257/107872999	4	107859097/107873433/107839862/107875274
sly00450	Selenocompound metabolism	1/439	15/4047	0.821916	1	107863655	LOC107863655	sly:101263926	1	0		1	107863655
sly00960	Tropane, piperidine and pyridine alkaloid biosynthesis	2/439	28/4047	0.824034	1	107851006/107845345	LOC107851006/LOC107845345	sly:100736464/sly:101264863	2	1	107851006	1	107845345
sly00240	Pyrimidine metabolism	4/439	52/4047	0.831344	1	107875281/107874589/107859741/107852748	LOC107875281/LOC107874589/LOC107859741/LOC107852748	sly:101255711/sly:101255503/sly:101244545/sly:101249548	4	1	107874589	3	107875281/107859741/107852748
sly04933	AGE-RAGE signaling pathway in diabetic complications	1/439	16/4047	0.841305	1	107873421	LOC107873421	sly:100301920	1	1	107873421	0
sly03008	Ribosome biogenesis in eukaryotes	5/439	69/4047	0.883234	1	107867739/107850743/107847664/107875330/107867252	LOC107867739/LOC107850743/LOC107847664/LOC107875330/LOC107867252	sly:101258362/sly:101248085/sly:101258526/sly:101245772/sly:101256087	5	3	107850743/107875330/107867252	2	107867739/107847664
sly00196	Photosynthesis - antenna proteins	1/439	19/4047	0.887722	1	107845349	LOC107845349	sly:101253628	1	0		1	107845349
sly01212	Fatty acid metabolism	4/439	60/4047	0.903758	1	107842456/107841760/107850244/107843433	LOC107842456/LOC107841760/LOC107850244/LOC107843433	sly:101262853/sly:101245130/sly:101250973/sly:101250354	4	3	107842456/107841760/107850244	1	107843433
sly00061	Fatty acid biosynthesis	2/439	35/4047	0.906448	1	107841760/107850244	LOC107841760/LOC107850244	sly:101245130/sly:101250973	2	2	107841760/107850244	0
sly00640	Propanoate metabolism	2/439	36/4047	0.914734	1	107850244/107842329	LOC107850244/LOC107842329	sly:101250973/sly:101263879	2	2	107850244/107842329	0
sly00600	Sphingolipid metabolism	1/439	22/4047	0.920584	1	107862365	LOC107862365	sly:778364	1	1	107862365	0
sly02010	ABC transporters	1/439	22/4047	0.920584	1	107870255	LOC107870255	sly:101265632	1	1	107870255	0
sly00510	N-Glycan biosynthesis	2/439	40/4047	0.941466	1	107860690/107870753	LOC107860690/LOC107870753	sly:101260885/sly:101268683	2	2	107860690/107870753	0
sly00565	Ether lipid metabolism	1/439	25/4047	0.943844	1	107866274	LOC107866274	sly:544181	1	1	107866274	0
sly04120	Ubiquitin mediated proteolysis	7/439	104/4047	0.944898	1	107845380/107854682/107850670/107859035/107849675/novel.2132/107839088	LOC107845380/LOC107854682/LOC107850670/LOC107859035/LOC107849675/-/LOC107839088	sly:101260872/sly:101249877/sly:101249698/sly:101260503/sly:101259391/sly:101258213/sly:101254223	7	3	107845380/107850670/107859035	4	107854682/107849675/novel.2132/107839088
sly04145	Phagosome	4/439	73/4047	0.964374	1	107851820/107853469/novel.3365/107875863	LOC107851820/LOC107853469/-/LOC107875863	sly:101258647/sly:101265829/sly:101246756/sly:101243898	4	1	107875863	3	107851820/107853469/novel.3365
sly01210	2-Oxocarboxylic acid metabolism	2/439	46/4047	0.967154	1	107859795/107860178	LOC107859795/LOC107860178	sly:101253647/sly:101264475	2	2	107859795/107860178	0
sly03020	RNA polymerase	1/439	30/4047	0.968501	1	107839851	LOC107839851	sly:101246067	1	1	107839851	0
sly03018	RNA degradation	5/439	88/4047	0.969532	1	107875683/107848258/107838901/107843197/107850743	LOC107875683/LOC107848258/LOC107838901/LOC107843197/LOC107850743	sly:101258270/sly:101268737/sly:101245783/sly:544068/sly:101248085	5	4	107875683/107848258/107843197/107850743	1	107838901
sly00100	Steroid biosynthesis	1/439	31/4047	0.971944	1	107857986	LOC107857986	sly:101254144	1	0		1	107857986
sly03022	Basal transcription factors	1/439	36/4047	0.984277	1	107838874	LOC107838874	sly:101264035	1	0		1	107838874
sly03430	Mismatch repair	1/439	37/4047	0.985998	1	107877977	LOC107877977	sly:100462656	1	0		1	107877977
sly00040	Pentose and glucuronate interconversions	3/439	73/4047	0.989335	1	107878151/107862290/107862261	LOC107878151/LOC107862290/LOC107862261	sly:101246311/sly:101261402/sly:101264109	3	1	107862290	2	107878151/107862261
sly03040	Spliceosome	9/439	156/4047	0.99127	1	107848904/novel.444/107870215/107875543/107855025/107839862/107840032/107839625/107859716	LOC107848904/-/LOC107870215/LOC107875543/LOC107855025/LOC107839862/LOC107840032/LOC107839625/LOC107859716	sly:101259321/sly:100134885/sly:101055596/sly:100736433/sly:101265451/sly:101265681/sly:101257217/sly:101257012/sly:101246043	9	5	107848904/107870215/107875543/107840032/107839625	4	novel.444/107855025/107839862/107859716
sly03015	mRNA surveillance pathway	4/439	108/4047	0.99826	1	107875901/107862553/107850914/107871351	LOC107875901/LOC107862553/LOC107850914/LOC107871351	sly:101256096/sly:101252047/sly:101260293/sly:101251680	4	2	107862553/107871351	2	107875901/107850914
sly03013	RNA transport	4/439	137/4047	0.999889	1	107866023/novel.4898/107842629/107870843	LOC107866023/-/LOC107842629/LOC107870843	sly:101247351/sly:101253396/sly:101258299/sly:101261101	4	2	107866023/107842629	2	novel.4898/107870843
sly00190	Oxidative phosphorylation	2/439	101/4047	0.999893	1	107859585/107877967	LOC107859585/LOC107877967	sly:101253342/sly:101263827	2	1	107877967	1	107859585
sly03010	Ribosome	4/439	214/4047	1	1	107839182/107864968/novel.3258/107870624	LOC107839182/LOC107864968/-/LOC107870624	sly:101268719/sly:101244648/sly:101265930/sly:101254152	4	0		4	107839182/107864968/novel.3258/107870624

## Sheet: cc6vscc0_KEGGenrich
KEGGID	Description	GeneRatio	BgRatio	pvalue	padj	geneID	geneName	keggID	Count	Up	Up_Gene_names	Down	Down_Gene_names
sly00195	Photosynthesis	33/1189	54/4055	1.04237e-06	0.000117788	107844032/107868483/107859585/107839911/107873079/107858989/107866881/107878908/107846834/107866833/107856476/107878867/107861831/107860359/107875374/107855007/107862342/107845875/107876125/107851947/107874570/107858690/107859535/107848242/107842516/107875316/107845286/107875659/107839909/107859876/107875667/107863280/107859036	LOC107844032/LOC107868483/LOC107859585/LOC107839911/LOC107873079/LOC107858989/LOC107866881/LOC107878908/LOC107846834/LOC107866833/LOC107856476/LOC107878867/LOC107861831/LOC107860359/LOC107875374/LOC107855007/LOC107862342/LOC107845875/LOC107876125/LOC107851947/LOC107874570/LOC107858690/LOC107859535/LOC107848242/LOC107842516/LOC107875316/LOC107845286/LOC107875659/LOC107839909/LOC107859876/LOC107875…	sly:101259494/sly:101254454/sly:101253342/sly:778301/sly:543978/sly:101245421/sly:101266666/sly:778297/sly:101245163/sly:544053/sly:544077/sly:101263732/sly:101264609/sly:101258321/sly:101265249/sly:101263132/sly:101259227/sly:101256723/sly:101248983/sly:101268297/sly:101257676/sly:544299/sly:543931/sly:101255222/sly:101245880/sly:101266426/sly:101249865/sly:101252890/sly:101248335/sly:101261284/…	33	2	107875659/107859036	31	107844032/107868483/107859585/107839911/107873079/107858989/107866881/107878908/107846834/107866833/107856476/107878867/107861831/107860359/107875374/107855007/107862342/107845875/107876125/107851947/107874570/107858690/107859535/107848242/107842516/107875316/107845286/107839909/107859876/107875667/107863280
sly00196	Photosynthesis - antenna proteins	15/1189	19/4055	1.0417e-05	0.000588559	107845349/107840893/107838850/107842738/107840025/107862252/107857025/107872234/107878133/107863778/107871477/107879833/107841969/107855767/107878708	LOC107845349/LOC107840893/LOC107838850/LOC107842738/LOC107840025/LOC107862252/LOC107857025/LOC107872234/LOC107878133/LOC107863778/LOC107871477/LOC107879833/LOC107841969/LOC107855767/LOC107878708	sly:101253628/sly:101252151/sly:101264376/sly:101249002/sly:101256629/sly:101268669/sly:101267774/sly:101253380/sly:543975/sly:101243766/sly:544310/sly:101257186/sly:543976/sly:101263969/sly:101268123	15	0		15	107845349/107840893/107838850/107842738/107840025/107862252/107857025/107872234/107878133/107863778/107871477/107879833/107841969/107855767/107878708
sly00860	Porphyrin and chlorophyll metabolism	25/1189	44/4055	0.000119764	0.00451112	107838934/107844048/107862250/107855028/107845383/107870073/107862118/107856090/107863035/107840071/107866321/107872994/107845435/107870054/107840658/107878895/107875768/107867325/107867750/107842746/107851663/107870727/107868082/107839766/107877925	LOC107838934/LOC107844048/LOC107862250/LOC107855028/LOC107845383/LOC107870073/LOC107862118/LOC107856090/LOC107863035/LOC107840071/LOC107866321/LOC107872994/LOC107845435/LOC107870054/LOC107840658/LOC107878895/LOC107875768/LOC107867325/LOC107867750/LOC107842746/LOC107851663/LOC107870727/LOC107868082/LOC107839766/LOC107877925	sly:101248153/sly:101257518/sly:101262299/sly:543647/sly:101255435/sly:101244176/sly:101267302/sly:101246744/sly:543967/sly:101259974/sly:778212/sly:101261422/sly:101244717/sly:101248868/sly:101259201/sly:101257684/sly:101250511/sly:101266935/sly:101252980/sly:101247061/sly:101268533/sly:101247019/sly:101244441/sly:101244420/sly:101258872	25	3	107838934/107866321/107877925	22	107844048/107862250/107855028/107845383/107870073/107862118/107856090/107863035/107840071/107872994/107845435/107870054/107840658/107878895/107875768/107867325/107867750/107842746/107851663/107870727/107868082/107839766
sly04075	Plant hormone signal transduction	87/1189	215/4055	0.000216334	0.00611144	107840207/107861852/107861622/107868079/107874569/107840891/107843874/107861681/107880011/107855965/107866619/107865243/107874961/107857547/107863844/107861786/107848541/107864089/107867191/107862455/107843441/107873139/107877508/novel.5058/107871198/107877442/107877900/107848380/107867043/107843885/107842906/novel.1349/107840500/107839300/107840017/107867155/107864637/107839295/107855162/1078507…	LOC107840207/LOC107861852/LOC107861622/LOC107868079/LOC107874569/LOC107840891/LOC107843874/LOC107861681/LOC107880011/LOC107855965/LOC107866619/LOC107865243/LOC107874961/LOC107857547/LOC107863844/LOC107861786/LOC107848541/LOC107864089/LOC107867191/LOC107862455/LOC107843441/LOC107873139/LOC107877508/-/LOC107871198/LOC107877442/LOC107877900/LOC107848380/LOC107867043/LOC107843885/LOC107842906/-/LOC10…	sly:101246970/sly:101055548/sly:543946/sly:101267832/sly:101055542/sly:100134911/sly:101248058/sly:100301927/sly:101245895/sly:101249794/sly:543712/sly:100316895/sly:101055592/sly:101260897/sly:543540/sly:101055552/sly:101247526/sly:100736445/sly:101243703/sly:101260711/sly:101250944/sly:101255303/sly:101245668/sly:101248065/sly:101248778/sly:101255313/sly:101247936/sly:101244285/sly:101250688/sl…	87	63	107840207/107861852/107861622/107868079/107874569/107840891/107861681/107855965/107866619/107865243/107874961/107863844/107861786/107848541/107864089/107862455/107843441/107877508/novel.5058/107871198/107877442/107877900/107867043/107842906/novel.1349/107839300/107840017/107864637/107855162/107850747/107867576/107839377/107855207/novel.3410/107863934/107870881/107839829/novel.5097/107840155/10785…	24	107843874/107880011/107857547/107867191/107873139/107848380/107843885/107840500/107867155/107839295/107859475/107867653/107861654/novel.2451/107867146/107840499/107863146/107869397/107869800/107844928/107854316/107860330/107872884/107861318
sly00710	Carbon fixation in photosynthetic organisms	33/1189	69/4055	0.000816039	0.0184425	107840119/107862248/107867663/107878843/107870368/107869777/107878881/107851146/107857557/107840104/107866774/107878607/107867324/107845282/107862261/107840477/107852742/107859905/107858619/107862704/107852345/107861641/107839152/107842298/107871105/107870788/107842812/107861340/107877699/107858580/107844759/107844405/107859004	LOC107840119/LOC107862248/LOC107867663/LOC107878843/LOC107870368/LOC107869777/LOC107878881/LOC107851146/LOC107857557/LOC107840104/LOC107866774/LOC107878607/LOC107867324/LOC107845282/LOC107862261/LOC107840477/LOC107852742/LOC107859905/LOC107858619/LOC107862704/LOC107852345/LOC107861641/LOC107839152/LOC107842298/LOC107871105/LOC107870788/LOC107842812/LOC107861340/LOC107877699/LOC107858580/LOC107844…	sly:778286/sly:101258932/sly:101266629/sly:101243907/sly:101266713/sly:101255322/sly:101253805/sly:101249445/sly:101245299/sly:101253137/sly:101264004/sly:101267723/sly:543812/sly:101256813/sly:101264109/sly:101246870/sly:101258368/sly:101250853/sly:101249428/sly:100736499/sly:101266063/sly:101246328/sly:101246962/sly:101258131/sly:100316873/sly:101248407/sly:101260852/sly:101268337/sly:101253541…	33	12	107862248/107878607/107867324/107845282/107852742/107859905/107858619/107862704/107852345/107861641/107839152/107842298	21	107840119/107867663/107878843/107870368/107869777/107878881/107851146/107857557/107840104/107866774/107862261/107840477/107871105/107870788/107842812/107861340/107877699/107858580/107844759/107844405/107859004
sly04016	MAPK signaling pathway - plant	55/1189	134/4055	0.00212142	0.0399533	107860522/107842605/107873437/107872867/107864513/107861622/107862088/107869622/107859787/107855965/107866619/107865243/107843743/107872955/107840204/107843441/107839265/107839975/107871198/107842906/107859801/107878300/107840017/107858934/107839295/107850747/107839377/107855207/107870881/107840155/107854865/107840074/107864851/107862854/107875997/107840920/107851395/107863146/107875867/107863244…	LOC107860522/LOC107842605/LOC107873437/LOC107872867/LOC107864513/LOC107861622/LOC107862088/LOC107869622/LOC107859787/LOC107855965/LOC107866619/LOC107865243/LOC107843743/LOC107872955/LOC107840204/LOC107843441/LOC107839265/LOC107839975/LOC107871198/LOC107842906/LOC107859801/LOC107878300/LOC107840017/LOC107858934/LOC107839295/LOC107850747/LOC107839377/LOC107855207/LOC107870881/LOC107840155/LOC107854…	sly:101251639/sly:101268787/sly:543880/sly:101255501/sly:101246650/sly:543946/sly:543603/sly:104647127/sly:543585/sly:101249794/sly:543712/sly:100316895/sly:544131/sly:101249467/sly:101262346/sly:101250944/sly:101261749/sly:101263165/sly:101248778/sly:101266151/sly:544149/sly:101264342/sly:100736531/sly:101260980/sly:101245105/sly:101261048/sly:543680/sly:101248690/sly:544165/sly:100191111/sly:10…	55	46	107860522/107842605/107873437/107872867/107864513/107861622/107862088/107869622/107855965/107866619/107865243/107843743/107872955/107840204/107843441/107839265/107839975/107871198/107842906/107859801/107878300/107840017/107858934/107850747/107839377/107855207/107870881/107840155/107854865/107840074/107862854/107875997/107840920/107851395/107863244/107858897/107872267/107849571/107855732/107843193…	9	107859787/107839295/107864851/107863146/107875867/novel.1313/107864886/107860330/107872884
sly04626	Plant-pathogen interaction	60/1189	152/4055	0.00400987	0.0647307	107860522/107842605/107874660/107845825/107872867/107860115/107843864/107877796/107861622/107843851/107861198/107862088/107875924/107868186/107843743/107860951/107872239/107839265/107839975/107872603/107850672/107842906/107855368/107865937/107878147/107877218/107868062/107869296/107850465/107878300/107840017/107859878/107858934/107855966/107878873/107840155/107862040/novel.2194/107840074/10785443…	LOC107860522/LOC107842605/LOC107874660/LOC107845825/LOC107872867/LOC107860115/LOC107843864/LOC107877796/LOC107861622/LOC107843851/LOC107861198/LOC107862088/LOC107875924/LOC107868186/LOC107843743/LOC107860951/LOC107872239/LOC107839265/LOC107839975/LOC107872603/LOC107850672/LOC107842906/LOC107855368/LOC107865937/LOC107878147/LOC107877218/LOC107868062/LOC107869296/LOC107850465/LOC107878300/LOC107840…	sly:101251639/sly:101268787/sly:101265138/sly:101256817/sly:101255501/sly:101256237/sly:101249692/sly:101250219/sly:543946/sly:101266882/sly:544042/sly:543603/sly:101256979/sly:100316879/sly:544131/sly:101252553/sly:101055516/sly:101261749/sly:101263165/sly:544041/sly:101256827/sly:101266151/sly:101253387/sly:101268854/sly:101252097/sly:101256200/sly:101260188/sly:101259993/sly:101245185/sly:1012…	60	50	107860522/107842605/107874660/107845825/107872867/107860115/107843864/107877796/107861622/107843851/107861198/107862088/107875924/107868186/107843743/107860951/107872239/107839265/107839975/107872603/107850672/107842906/107855368/107865937/107878147/107878300/107840017/107859878/107858934/107855966/107878873/107840155/107840074/107854436/107875997/107878126/107860484/107863939/107878173/107864403…	10	107877218/107868062/107869296/107850465/107862040/novel.2194/107850948/107860627/novel.430/novel.342
sly04712	Circadian rhythm - plant	19/1189	40/4055	0.0111181	0.157044	107862999/107850670/107845418/107850365/107867504/107871256/107850219/107838759/novel.651/107843364/107864266/107849675/107878104/107862265/107838859/107842184/107850642/107838719/107860209	LOC107862999/LOC107850670/LOC107845418/LOC107850365/LOC107867504/LOC107871256/LOC107850219/LOC107838759/-/LOC107843364/LOC107864266/LOC107849675/LOC107878104/LOC107862265/LOC107838859/LOC107842184/LOC107850642/LOC107838719/LOC107860209	sly:101250283/sly:101249698/sly:101262866/sly:101258346/sly:544219/sly:778295/sly:101254785/sly:101256908/sly:101246108/sly:101249224/sly:778294/sly:101259391/sly:101259349/sly:101259425/sly:543733/sly:543547/sly:101268174/sly:100736520/sly:101256338	19	14	107862999/107850670/107845418/107850365/107871256/107850219/107838759/107843364/107864266/107878104/107862265/107838859/107842184/107860209	5	107867504/novel.651/107849675/107850642/107838719
sly00941	Flavonoid biosynthesis	14/1189	29/4055	0.0236765	0.287728	107875407/107844729/107860031/107871256/107860278/107875625/107871144/107864266/107862334/107866341/107840863/107852750/107851884/107844023	LOC107875407/LOC107844729/LOC107860031/LOC107871256/LOC107860278/LOC107875625/LOC107871144/LOC107864266/LOC107862334/LOC107866341/LOC107840863/LOC107852750/LOC107851884/LOC107844023	sly:101244196/sly:101261765/sly:544150/sly:778295/sly:101265690/sly:101244961/sly:101266223/sly:778294/sly:101266618/sly:101251607/sly:544249/sly:101249265/sly:100191129/sly:101262367	14	14	107875407/107844729/107860031/107871256/107860278/107875625/107871144/107864266/107862334/107866341/107840863/107852750/107851884/107844023	0
sly01200	Carbon metabolism	85/1189	242/4055	0.0256347	0.287728	107839921/novel.5398/107840119/107859787/107862248/107839203/107859795/107867663/107878843/107870368/novel.5863/107845759/107869777/107878881/107871444/107870847/107851146/107857557/107840104/107859603/107839482/107866774/107870413/107843171/107854965/107878607/107867324/107845282/107840161/107862261/107861683/107867550/107847937/107853880/107840477/107877384/107852742/107869328/107847275/1078617…	LOC107839921/-/LOC107840119/LOC107859787/LOC107862248/LOC107839203/LOC107859795/LOC107867663/LOC107878843/LOC107870368/-/LOC107845759/LOC107869777/LOC107878881/LOC107871444/LOC107870847/LOC107851146/LOC107857557/LOC107840104/LOC107859603/LOC107839482/LOC107866774/LOC107870413/LOC107843171/LOC107854965/LOC107878607/LOC107867324/LOC107845282/LOC107840161/LOC107862261/LOC107861683/LOC107867550/LOC10…	sly:101250548/sly:543522/sly:778286/sly:543585/sly:101258932/sly:101255033/sly:101253647/sly:101266629/sly:101243907/sly:101266713/sly:101257857/sly:101245503/sly:101255322/sly:101253805/sly:543869/sly:101253277/sly:101249445/sly:101245299/sly:101253137/sly:101249137/sly:101246283/sly:101264004/sly:101250010/sly:101248036/sly:101257194/sly:101267723/sly:543812/sly:101256813/sly:101259587/sly:1012…	85	42	107839921/107862248/107859795/107870847/107870413/107843171/107878607/107867324/107845282/107840161/107867550/107847937/107853880/107877384/107852742/107869328/107872898/107858266/107860713/107864063/107843197/107878086/107843616/107843119/107859905/107858619/107862704/107868504/107852345/107861641/107863060/107839152/107842298/107851138/107859955/107855661/107870082/107861619/107869516/107838817…	43	novel.5398/107840119/107859787/107839203/107867663/107878843/107870368/novel.5863/107845759/107869777/107878881/107871444/107851146/107857557/107840104/107859603/107839482/107866774/107854965/107862261/107861683/107840477/107847275/107861722/107860120/novel.946/107860201/107878064/107844443/107841728/107871105/107840829/107870788/107864096/107866355/107842812/107861340/107877699/107858580/1078447…
sly00030	Pentose phosphate pathway	20/1189	46/4055	0.028009	0.287728	107867663/107878843/107857557/107840104/107862261/107853880/107840477/107872898/107866750/107859905/107868504/107852345/107878064/107863060/107851138/107870082/107842812/107844405/107859004/107878178	LOC107867663/LOC107878843/LOC107857557/LOC107840104/LOC107862261/LOC107853880/LOC107840477/LOC107872898/LOC107866750/LOC107859905/LOC107868504/LOC107852345/LOC107878064/LOC107863060/LOC107851138/LOC107870082/LOC107842812/LOC107844405/LOC107859004/LOC107878178	sly:101266629/sly:101243907/sly:101245299/sly:101253137/sly:101264109/sly:543623/sly:101246870/sly:101244195/sly:101245455/sly:101250853/sly:101253589/sly:101266063/sly:101268121/sly:101262229/sly:101268243/sly:101253771/sly:101260852/sly:101264273/sly:101266787/sly:101245182	20	10	107853880/107872898/107866750/107859905/107868504/107852345/107863060/107851138/107870082/107878178	10	107867663/107878843/107857557/107840104/107862261/107840477/107878064/107842812/107844405/107859004
sly00750	Vitamin B6 metabolism	7/1189	4055-12-01	0.0339793	0.319972	107863057/107862446/107858266/107875470/107861704/107876074/107870897	LOC107863057/LOC107862446/LOC107858266/LOC107875470/LOC107861704/LOC107876074/LOC107870897	sly:101244752/sly:101258934/sly:101254553/sly:101257782/sly:101260521/sly:101244777/sly:101248203	7	3	107862446/107858266/107875470	4	107863057/107861704/107876074/107870897
sly04070	Phosphatidylinositol signaling system	25/1189	63/4055	0.0491011	0.426802	107860522/107875799/107843743/107867306/107855115/107871226/107867978/107876583/107870111/107868461/107861644/107864327/107839935/107840074/107851478/107850475/107862895/107862289/107873209/107870845/107851383/107870646/107864626/107842366/107848429	LOC107860522/LOC107875799/LOC107843743/LOC107867306/LOC107855115/LOC107871226/LOC107867978/LOC107876583/LOC107870111/LOC107868461/LOC107861644/LOC107864327/LOC107839935/LOC107840074/LOC107851478/LOC107850475/LOC107862895/LOC107862289/LOC107873209/LOC107870845/LOC107851383/LOC107870646/LOC107864626/LOC107842366/LOC107848429	sly:101251639/sly:101262819/sly:544131/sly:101246342/sly:101262422/sly:101255650/sly:101251739/sly:101260244/sly:544280/sly:101259812/sly:101246905/sly:100301919/sly:101254537/sly:101245298/sly:101267407/sly:101248349/sly:101262094/sly:101256961/sly:100301922/sly:101263796/sly:101243786/sly:101260812/sly:101244032/sly:100301941/sly:544171	25	14	107860522/107875799/107843743/107867306/107855115/107861644/107864327/107839935/107840074/107850475/107862895/107862289/107851383/107864626	11	107871226/107867978/107876583/107870111/107868461/107851478/107873209/107870845/107870646/107842366/107848429
sly00970	Aminoacyl-tRNA biosynthesis	19/1189	46/4055	0.0543694	0.438839	novel.2727/107877813/107871447/107860455/107844145/107870342/107840658/107873105/107878157/107880061/107842328/107862189/107838711/107860102/107847885/107839766/107878658/107840260/107863740	-/LOC107877813/LOC107871447/LOC107860455/LOC107844145/LOC107870342/LOC107840658/LOC107873105/LOC107878157/LOC107880061/LOC107842328/LOC107862189/LOC107838711/LOC107860102/LOC107847885/LOC107839766/LOC107878658/LOC107840260/LOC107863740	sly:101247918/sly:101255211/sly:101247618/sly:101256769/sly:101250918/sly:101257430/sly:101259201/sly:101268820/sly:101249471/sly:101243628/sly:101249760/sly:101267504/sly:101268498/sly:101261082/sly:101251979/sly:101244420/sly:101255220/sly:101251229/sly:101264294	19	3	novel.2727/107870342/107847885	16	107877813/107871447/107860455/107844145/107840658/107873105/107878157/107880061/107842328/107862189/107838711/107860102/107839766/107878658/107840260/107863740
sly01230	Biosynthesis of amino acids	73/1189	213/4055	0.0616457	0.464398	107842110/107875636/107839921/107850602/107867463/novel.5223/107839203/107859795/107878843/novel.4074/107845759/107870410/107878881/107870781/107857557/107839482/107870413/107843171/107845282/novel.6385/107842830/novel.5432/107840161/107862261/107851006/107867550/107853880/107840477/107877384/107852742/107869328/107850308/107860120/107872898/107858266/107860819/107870519/107838765/107843197/10784…	LOC107842110/LOC107875636/LOC107839921/LOC107850602/LOC107867463/-/LOC107839203/LOC107859795/LOC107878843/-/LOC107845759/LOC107870410/LOC107878881/LOC107870781/LOC107857557/LOC107839482/LOC107870413/LOC107843171/LOC107845282/-/LOC107842830/-/LOC107840161/LOC107862261/LOC107851006/LOC107867550/LOC107853880/LOC107840477/LOC107877384/LOC107852742/LOC107869328/LOC107850308/LOC107860120/LOC107872898/L…	sly:101259361/sly:101247331/sly:101250548/sly:101247506/sly:544153/sly:101251709/sly:101255033/sly:101253647/sly:101243907/sly:101253321/sly:101245503/sly:101248664/sly:101253805/sly:101265030/sly:101245299/sly:101246283/sly:101250010/sly:101248036/sly:101256813/sly:101248036/sly:101265440/sly:101245890/sly:101259587/sly:101264109/sly:100736464/sly:101247124/sly:543623/sly:101246870/sly:101265671…	73	41	107842110/107875636/107839921/107850602/107867463/107859795/107870413/107843171/107845282/novel.6385/107840161/107851006/107867550/107853880/107877384/107852742/107869328/107872898/107858266/107870519/107843197/107845682/107843616/107843119/107858927/107859905/107867808/107843129/107862704/107865960/107852345/107861641/107860909/107864577/107867374/107851138/107855661/107870082/107878340/10786161…	32	novel.5223/107839203/107878843/novel.4074/107845759/107870410/107878881/107870781/107857557/107839482/107842830/novel.5432/107862261/107840477/107850308/107860120/107860819/107838765/107850416/107878064/107844443/107873131/107841728/107840659/107851945/107861704/107864096/107853897/107876074/107838948/107859004/107853524
sly00760	Nicotinate and nicotinamide metabolism	9/1189	19/4055	0.0734254	0.518567	107874740/107870650/107862603/107863875/107867787/107860287/107863696/107840108/107861725	LOC107874740/LOC107870650/LOC107862603/LOC107863875/LOC107867787/LOC107860287/LOC107863696/LOC107840108/LOC107861725	sly:101263635/sly:101255294/sly:101246910/sly:101245868/sly:101266835/sly:101264576/sly:101264098/sly:101251614/sly:101263094	9	6	107874740/107862603/107863875/107860287/107840108/107861725	3	107870650/107867787/107863696
sly00562	Inositol phosphate metabolism	23/1189	62/4055	0.11363	0.731155	107875799/107867306/107871226/107850683/107867978/107867848/107876583/107870111/107861644/107864327/107839935/107851478/107870994/107875475/107850475/107862895/107876100/107873209/107861649/107871120/107870845/107870646/107842366	LOC107875799/LOC107867306/LOC107871226/LOC107850683/LOC107867978/LOC107867848/LOC107876583/LOC107870111/LOC107861644/LOC107864327/LOC107839935/LOC107851478/LOC107870994/LOC107875475/LOC107850475/LOC107862895/LOC107876100/LOC107873209/LOC107861649/LOC107871120/LOC107870845/LOC107870646/LOC107842366	sly:101262819/sly:101246342/sly:101255650/sly:544226/sly:101251739/sly:101256545/sly:101260244/sly:544280/sly:101246905/sly:100301919/sly:101254537/sly:101267407/sly:543809/sly:101255702/sly:101248349/sly:101262094/sly:101263222/sly:100301922/sly:101248857/sly:101260052/sly:101263796/sly:101260812/sly:100301941	23	14	107875799/107867306/107850683/107867848/107861644/107864327/107839935/107870994/107875475/107850475/107862895/107876100/107861649/107871120	9	107871226/107867978/107876583/107870111/107851478/107873209/107870845/107870646/107842366
sly00360	Phenylalanine metabolism	19/1189	50/4055	0.116467	0.731155	107843092/107863937/107875407/107843343/107862932/107879725/107862076/107854291/107860278/107851006/107842494/107848444/107869755/107878340/107865520/107853897/107838948/107876335/107853524	LOC107843092/LOC107863937/LOC107875407/LOC107843343/LOC107862932/LOC107879725/LOC107862076/LOC107854291/LOC107860278/LOC107851006/LOC107842494/LOC107848444/LOC107869755/LOC107878340/LOC107865520/LOC107853897/LOC107838948/LOC107876335/LOC107853524	sly:101243922/sly:101249824/sly:101244196/sly:104644402/sly:101251363/sly:778254/sly:101249624/sly:101243656/sly:101265690/sly:100736464/sly:101244707/sly:778256/sly:101255909/sly:101250231/sly:101254423/sly:101260925/sly:101261642/sly:543808/sly:101249935	19	14	107843092/107863937/107875407/107862932/107879725/107862076/107854291/107860278/107851006/107848444/107869755/107878340/107865520/107876335	5	107843343/107842494/107853897/107838948/107853524
sly00920	Sulfur metabolism	12/1189	30/4055	0.13892	0.826209	107859594/107839203/107859432/107845759/107839482/107854050/107851478/107858434/107859485/107864096/107864673/107863787	LOC107859594/LOC107839203/LOC107859432/LOC107845759/LOC107839482/LOC107854050/LOC107851478/LOC107858434/LOC107859485/LOC107864096/LOC107864673/LOC107863787	sly:544267/sly:101255033/sly:101259503/sly:101245503/sly:101246283/sly:101055609/sly:101267407/sly:101257319/sly:101251352/sly:101244415/sly:101259979/sly:101246318	12	5	107859594/107859432/107858434/107864673/107863787	7	107839203/107845759/107839482/107854050/107851478/107859485/107864096
sly00053	Ascorbate and aldarate metabolism	14/1189	37/4055	0.167468	0.869189	107862290/107873361/107878151/107875751/107839422/107868078/107870111/107875512/107842932/107873435/107876100/107860470/107864663/107867450	LOC107862290/LOC107873361/LOC107878151/LOC107875751/LOC107839422/LOC107868078/LOC107870111/LOC107875512/LOC107842932/LOC107873435/LOC107876100/LOC107860470/LOC107864663/LOC107867450	sly:101261402/sly:778229/sly:101246311/sly:101055572/sly:100316902/sly:778341/sly:544280/sly:101253411/sly:101258987/sly:778224/sly:101263222/sly:101263958/sly:100316874/sly:101263901	14	7	107862290/107875751/107875512/107842932/107873435/107876100/107860470	7	107873361/107878151/107839422/107868078/107870111/107864663/107867450
sly00906	Carotenoid biosynthesis	12/1189	31/4055	0.169112	0.869189	107850059/107852027/107868281/107851558/107846808/107855067/107863219/107849564/107839468/107872934/107840923/107840293	LOC107850059/LOC107852027/LOC107868281/LOC107851558/LOC107846808/LOC107855067/LOC107863219/LOC107849564/LOC107839468/LOC107872934/LOC107840923/LOC107840293	sly:101249565/sly:544163/sly:543988/sly:101267857/sly:100316877/sly:101254591/sly:544297/sly:100750250/sly:543629/sly:100322877/sly:544129/sly:101266767	12	6	107850059/107852027/107868281/107846808/107863219/107849564	6	107851558/107855067/107839468/107872934/107840923/107840293
sly00908	Zeatin biosynthesis	11/1189	28/4055	0.169223	0.869189	107847679/107854914/107853864/107838882/107843843/107853867/107867342/107879647/107857008/novel.2497/107878068	LOC107847679/LOC107854914/LOC107853864/LOC107838882/LOC107843843/LOC107853867/LOC107867342/LOC107879647/LOC107857008/-/LOC107878068	sly:101268254/sly:100874537/sly:101263304/sly:101258827/sly:101246295/sly:101262709/sly:101263012/sly:101244307/sly:101259193/sly:101259234/sly:101254402	11	5	107847679/107854914/107843843/107857008/107878068	6	107853864/107838882/107853867/107867342/107879647/novel.2497
sly00010	Glycolysis / Gluconeogenesis	36/1189	107/4055	0.186479	0.916178	107867663/107878843/107878881/107840104/107859988/107870413/107843171/107867324/107845282/107840161/107867550/107847937/107840477/107877384/107852742/107869328/107845990/107866750/107843197/107843616/107855325/107859905/107862704/107852345/107878064/107877951/107851138/107870082/107840829/107842812/107842839/107871120/107869516/107844405/107876107/107878178	LOC107867663/LOC107878843/LOC107878881/LOC107840104/LOC107859988/LOC107870413/LOC107843171/LOC107867324/LOC107845282/LOC107840161/LOC107867550/LOC107847937/LOC107840477/LOC107877384/LOC107852742/LOC107869328/LOC107845990/LOC107866750/LOC107843197/LOC107843616/LOC107855325/LOC107859905/LOC107862704/LOC107852345/LOC107878064/LOC107877951/LOC107851138/LOC107870082/LOC107840829/LOC107842812/LOC107842…	sly:101266629/sly:101243907/sly:101253805/sly:101253137/sly:101263563/sly:101250010/sly:101248036/sly:543812/sly:101256813/sly:101259587/sly:101247124/sly:101254693/sly:101246870/sly:101265671/sly:101258368/sly:101263236/sly:101247173/sly:101245455/sly:544068/sly:101265599/sly:101265664/sly:101250853/sly:100736499/sly:101266063/sly:101268121/sly:101265043/sly:101268243/sly:101253771/sly:101252984…	36	23	107870413/107843171/107867324/107845282/107840161/107867550/107847937/107877384/107852742/107869328/107845990/107866750/107843197/107843616/107859905/107862704/107852345/107851138/107870082/107842839/107871120/107869516/107878178	13	107867663/107878843/107878881/107840104/107859988/107840477/107855325/107878064/107877951/107840829/107842812/107844405/107876107
sly00900	Terpenoid backbone biosynthesis	17/1189	48/4055	0.217094	0.950043	107872939/107862250/107857663/107867046/107859749/107851334/107852925/107852315/107850997/107850614/107878086/107854680/107870370/107853522/107856323/107863738/107858709	LOC107872939/LOC107862250/LOC107857663/LOC107867046/LOC107859749/LOC107851334/LOC107852925/LOC107852315/LOC107850997/LOC107850614/LOC107878086/LOC107854680/LOC107870370/LOC107853522/LOC107856323/LOC107863738/LOC107858709	sly:101250227/sly:101262299/sly:101265292/sly:778360/sly:543702/sly:101252619/sly:101244138/sly:544220/sly:100134900/sly:101250000/sly:101262830/sly:100037490/sly:101267014/sly:101251334/sly:101266434/sly:543552/sly:101256248	17	9	107872939/107857663/107867046/107859749/107850997/107878086/107856323/107863738/107858709	8	107862250/107851334/107852925/107852315/107850614/107854680/107870370/107853522
sly00230	Purine metabolism	28/1189	83/4055	0.218594	0.950043	107861661/107857603/107850729/107870413/107843171/107851217/107857653/107840161/107860754/107877384/107869328/107872898/107868058/107843922/107843616/107865390/107858882/107851994/107875867/107867410/107852502/107856002/107870346/107848351/107843100/107861725/107847788/107864673	LOC107861661/LOC107857603/LOC107850729/LOC107870413/LOC107843171/LOC107851217/LOC107857653/LOC107840161/LOC107860754/LOC107877384/LOC107869328/LOC107872898/LOC107868058/LOC107843922/LOC107843616/LOC107865390/LOC107858882/LOC107851994/LOC107875867/LOC107867410/LOC107852502/LOC107856002/LOC107870346/LOC107848351/LOC107843100/LOC107861725/LOC107847788/LOC107864673	sly:101251456/sly:101253148/sly:101254478/sly:101250010/sly:101248036/sly:101250287/sly:101246321/sly:101259587/sly:101246297/sly:101265671/sly:101263236/sly:101244195/sly:101264119/sly:101261672/sly:101265599/sly:101256508/sly:101266592/sly:100037732/sly:101262221/sly:101248507/sly:101246417/sly:101246464/sly:100316897/sly:101055607/sly:101244800/sly:101263094/sly:101254382/sly:101259979	28	19	107861661/107850729/107870413/107843171/107840161/107860754/107877384/107869328/107872898/107843922/107843616/107851994/107852502/107856002/107848351/107843100/107861725/107847788/107864673	9	107857603/107851217/107857653/107868058/107865390/107858882/107875867/107867410/107870346
sly00620	Pyruvate metabolism	28/1189	83/4055	0.218594	0.950043	107840119/107862248/107871444/novel.1199/107870413/107843171/107878607/107867324/107839025/107850244/107840161/107847937/107877384/107869328/107864063/107878086/107852146/107843616/107858619/107873262/107839152/107859593/107842298/107851945/107870788/107844759/107847964/107859656	LOC107840119/LOC107862248/LOC107871444/-/LOC107870413/LOC107843171/LOC107878607/LOC107867324/LOC107839025/LOC107850244/LOC107840161/LOC107847937/LOC107877384/LOC107869328/LOC107864063/LOC107878086/LOC107852146/LOC107843616/LOC107858619/LOC107873262/LOC107839152/LOC107859593/LOC107842298/LOC107851945/LOC107870788/LOC107844759/LOC107847964/LOC107859656	sly:778286/sly:101258932/sly:543869/sly:101262949/sly:101250010/sly:101248036/sly:101267723/sly:543812/sly:101259466/sly:101250973/sly:101259587/sly:101254693/sly:101265671/sly:101263236/sly:101265278/sly:101262830/sly:101266523/sly:101265599/sly:101249428/sly:101247226/sly:101246962/sly:101251054/sly:101258131/sly:101251907/sly:101248407/sly:778330/sly:544161/sly:101263864	28	19	107862248/107870413/107843171/107878607/107867324/107850244/107840161/107847937/107877384/107869328/107864063/107878086/107852146/107843616/107858619/107873262/107839152/107859593/107842298	9	107840119/107871444/novel.1199/107839025/107851945/107870788/107844759/107847964/107859656
sly00520	Amino sugar and nucleotide sugar metabolism	35/1189	106/4055	0.228006	0.954248	107854073/107875632/107862290/107859000/107854241/107840845/107851696/107878151/107856611/107839422/107864032/107859801/107852117/107850846/107840015/107841023/107845431/107850962/107862123/107877663/107843457/107851333/107845778/107860470/107862761/107839408/107875763/107840421/107872499/107878567/107877852/107878072/107864663/107876107/107865562	LOC107854073/LOC107875632/LOC107862290/LOC107859000/LOC107854241/LOC107840845/LOC107851696/LOC107878151/LOC107856611/LOC107839422/LOC107864032/LOC107859801/LOC107852117/LOC107850846/LOC107840015/LOC107841023/LOC107845431/LOC107850962/LOC107862123/LOC107877663/LOC107843457/LOC107851333/LOC107845778/LOC107860470/LOC107862761/LOC107839408/LOC107875763/LOC107840421/LOC107872499/LOC107878567/LOC107877…	sly:101258487/sly:101244155/sly:101261402/sly:101267862/sly:101257677/sly:101251855/sly:101247369/sly:101246311/sly:101258640/sly:100316902/sly:101246662/sly:544149/sly:101247451/sly:101265535/sly:543515/sly:544039/sly:101260709/sly:101248935/sly:101266709/sly:101257483/sly:100529103/sly:101248179/sly:101247969/sly:101263958/sly:101257145/sly:778245/sly:544022/sly:544283/sly:101268802/sly:1012496…	35	24	107854073/107875632/107862290/107859000/107854241/107840845/107851696/107864032/107859801/107852117/107850846/107845431/107850962/107877663/107851333/107860470/107862761/107839408/107875763/107840421/107872499/107878567/107877852/107878072	11	107878151/107856611/107839422/107840015/107841023/107862123/107843457/107845778/107864663/107876107/107865562
sly00051	Fructose and mannose metabolism	19/1189	55/4055	0.236575	0.954749	107867663/107878843/107856611/107840104/107840477/107859926/107866750/107862123/107859905/107852345/107878064/107851138/107870082/107839408/107875763/107842812/107844405/107876107/107878178	LOC107867663/LOC107878843/LOC107856611/LOC107840104/LOC107840477/LOC107859926/LOC107866750/LOC107862123/LOC107859905/LOC107852345/LOC107878064/LOC107851138/LOC107870082/LOC107839408/LOC107875763/LOC107842812/LOC107844405/LOC107876107/LOC107878178	sly:101266629/sly:101243907/sly:101258640/sly:101253137/sly:101246870/sly:101265391/sly:101245455/sly:101266709/sly:101250853/sly:101266063/sly:101268121/sly:101268243/sly:101253771/sly:778245/sly:544022/sly:101260852/sly:101264273/sly:543638/sly:101245182	19	9	107859926/107866750/107859905/107852345/107851138/107870082/107839408/107875763/107878178	10	107867663/107878843/107856611/107840104/107840477/107862123/107878064/107842812/107844405/107876107
sly00052	Galactose metabolism	16/1189	46/4055	0.252248	0.982897	107859925/107860671/107840322/107850962/107839109/107878064/107851333/107845778/107851138/107847409/107870082/107862569/107859669/107876107/107840458/107865562	LOC107859925/LOC107860671/LOC107840322/LOC107850962/LOC107839109/LOC107878064/LOC107851333/LOC107845778/LOC107851138/LOC107847409/LOC107870082/LOC107862569/LOC107859669/LOC107876107/LOC107840458/LOC107865562	sly:100316891/sly:101257623/sly:101263843/sly:101248935/sly:544236/sly:101268121/sly:101248179/sly:101247969/sly:101268243/sly:101256611/sly:101253771/sly:101262300/sly:101266532/sly:543638/sly:101261450/sly:101266745	16	10	107859925/107860671/107840322/107850962/107851333/107851138/107870082/107862569/107859669/107840458	6	107839109/107878064/107845778/107847409/107876107/107865562
sly00960	Tropane, piperidine and pyridine alkaloid biosynthesis	10/1189	28/4055	0.288882	0.999988	107851006/107867623/107854568/107878340/107865520/107853897/107875334/107838948/107876335/107853524	LOC107851006/LOC107867623/LOC107854568/LOC107878340/LOC107865520/LOC107853897/LOC107875334/LOC107838948/LOC107876335/LOC107853524	sly:100736464/sly:101263402/sly:101265293/sly:101250231/sly:101254423/sly:101260925/sly:101247232/sly:101261642/sly:543808/sly:101249935	10	7	107851006/107867623/107854568/107878340/107865520/107875334/107876335	3	107853897/107838948/107853524
sly00561	Glycerolipid metabolism	23/1189	70/4055	0.296176	0.999988	107878499/107862846/107877723/107850590/107855115/107861698/107872465/107873296/107858867/107871471/107862040/107855051/107865980/107862289/107872293/107842839/107843908/107851383/107867147/107860088/107852913/107875629/107848429	LOC107878499/LOC107862846/LOC107877723/LOC107850590/LOC107855115/LOC107861698/LOC107872465/LOC107873296/LOC107858867/LOC107871471/LOC107862040/LOC107855051/LOC107865980/LOC107862289/LOC107872293/LOC107842839/LOC107843908/LOC107851383/LOC107867147/LOC107860088/LOC107852913/LOC107875629/LOC107848429	sly:101247838/sly:101249534/sly:101259856/sly:101251763/sly:101262422/sly:101259322/sly:101257361/sly:101246145/sly:101245720/sly:101255399/sly:101259139/sly:101259602/sly:101246167/sly:101256961/sly:101257357/sly:101256514/sly:101255254/sly:101243786/sly:101261812/sly:101260497/sly:101249508/sly:101261928/sly:544171	23	12	107878499/107862846/107877723/107855115/107872465/107858867/107855051/107862289/107872293/107842839/107851383/107852913	11	107850590/107861698/107873296/107871471/107862040/107865980/107843908/107867147/107860088/107875629/107848429
sly00730	Thiamine metabolism	7/1189	19/4055	0.3103	0.999988	107842524/107850729/107856341/107859361/107852315/107860754/107873461	LOC107842524/LOC107850729/LOC107856341/LOC107859361/LOC107852315/LOC107860754/LOC107873461	sly:101246176/sly:101254478/sly:101257192/sly:101247277/sly:544220/sly:101246297/sly:101264726	7	4	107842524/107850729/107856341/107860754	3	107859361/107852315/107873461
sly00904	Diterpenoid biosynthesis	8/1189	23/4055	0.354179	0.999988	107861895/107840383/107878924/107861129/107868331/107859548/107862827/107845836	LOC107861895/LOC107840383/LOC107878924/LOC107861129/LOC107868331/LOC107859548/LOC107862827/LOC107845836	sly:543504/sly:100134888/sly:101252605/sly:101249786/sly:101262489/sly:101263073/sly:101250428/sly:100134890	8	6	107861895/107840383/107878924/107861129/107859548/107845836	2	107868331/107862827
sly03022	Basal transcription factors	12/1189	36/4055	0.356219	0.999988	107838874/107850411/107877504/107876068/107867222/107843121/107870275/107863662/107838732/107843846/107872836/107864765	LOC107838874/LOC107850411/LOC107877504/LOC107876068/LOC107867222/LOC107843121/LOC107870275/LOC107863662/LOC107838732/LOC107843846/LOC107872836/LOC107864765	sly:101264035/sly:101254156/sly:101245072/sly:101245068/sly:101262209/sly:101264247/sly:101244946/sly:101251406/sly:101254627/sly:101252540/sly:101268876/sly:101253215	12	7	107850411/107877504/107867222/107843121/107843846/107872836/107864765	5	107838874/107876068/107870275/107863662/107838732
sly00630	Glyoxylate and dicarboxylate metabolism	22/1189	69/4055	0.361811	0.999988	107839921/107840119/107858887/107859787/107862248/107859603/107854965/107861683/107847275/107861722/107860120/107860201/107870519/107878086/107843119/107858619/107855661/107866355/107861340/107858580/107844759/107838817	LOC107839921/LOC107840119/LOC107858887/LOC107859787/LOC107862248/LOC107859603/LOC107854965/LOC107861683/LOC107847275/LOC107861722/LOC107860120/LOC107860201/LOC107870519/LOC107878086/LOC107843119/LOC107858619/LOC107855661/LOC107866355/LOC107861340/LOC107858580/LOC107844759/LOC107838817	sly:101250548/sly:778286/sly:101251259/sly:543585/sly:101258932/sly:101249137/sly:101257194/sly:101256164/sly:544250/sly:100147725/sly:101254439/sly:101258424/sly:544275/sly:101262830/sly:101249011/sly:101249428/sly:101260902/sly:101251910/sly:101268337/sly:543974/sly:778330/sly:101246162	22	9	107839921/107858887/107862248/107870519/107878086/107843119/107858619/107855661/107838817	13	107840119/107859787/107859603/107854965/107861683/107847275/107861722/107860120/107860201/107866355/107861340/107858580/107844759
sly00945	Stilbenoid, diarylheptanoid and gingerol biosynthesis	7/1189	20/4055	0.36594	0.999988	107875407/107844729/107860278/107875625/107840863/107851884/107844023	LOC107875407/LOC107844729/LOC107860278/LOC107875625/LOC107840863/LOC107851884/LOC107844023	sly:101244196/sly:101261765/sly:101265690/sly:101244961/sly:544249/sly:100191129/sly:101262367	7	7	107875407/107844729/107860278/107875625/107840863/107851884/107844023	0
sly00130	Ubiquinone and other terpenoid-quinone biosynthesis	13/1189	40/4055	0.385625	0.999988	107875407/107862932/107862076/107859398/107878470/107859509/107845297/107859040/107848299/107869755/107878340/107863754/107853524	LOC107875407/LOC107862932/LOC107862076/LOC107859398/LOC107878470/LOC107859509/LOC107845297/LOC107859040/LOC107848299/LOC107869755/LOC107878340/LOC107863754/LOC107853524	sly:101244196/sly:101251363/sly:101249624/sly:101245223/sly:101257784/sly:101245803/sly:101247015/sly:101259906/sly:101262657/sly:101255909/sly:101250231/sly:101263675/sly:101249935	13	8	107875407/107862932/107862076/107878470/107859509/107848299/107869755/107878340	5	107859398/107845297/107859040/107863754/107853524
sly00260	Glycine, serine and threonine metabolism	19/1189	60/4055	0.391008	0.999988	107839921/107870410/107859603/107854965/107867550/107860120/107858266/107838765/107845682/107844443/107873131/107841728/107855640/107861619/107865520/107861704/107866355/107876074/107876335	LOC107839921/LOC107870410/LOC107859603/LOC107854965/LOC107867550/LOC107860120/LOC107858266/LOC107838765/LOC107845682/LOC107844443/LOC107873131/LOC107841728/LOC107855640/LOC107861619/LOC107865520/LOC107861704/LOC107866355/LOC107876074/LOC107876335	sly:101250548/sly:101248664/sly:101249137/sly:101257194/sly:101247124/sly:101254439/sly:101254553/sly:101258686/sly:101256422/sly:100037737/sly:101247807/sly:543983/sly:101249833/sly:101266918/sly:101254423/sly:101260521/sly:101251910/sly:101244777/sly:543808	19	8	107839921/107867550/107858266/107845682/107855640/107861619/107865520/107876335	11	107870410/107859603/107854965/107860120/107838765/107844443/107873131/107841728/107861704/107866355/107876074
sly00270	Cysteine and methionine metabolism	27/1189	87/4055	0.401152	0.999988	107850602/107840119/107864513/107853805/107862248/107839203/107842189/107845759/107839482/107840524/107840630/107847831/107838765/107845758/107847415/107861847/107843129/107858619/107839536/107853488/107878340/107864096/107865075/107838948/107844759/107839239/107853524	LOC107850602/LOC107840119/LOC107864513/LOC107853805/LOC107862248/LOC107839203/LOC107842189/LOC107845759/LOC107839482/LOC107840524/LOC107840630/LOC107847831/LOC107838765/LOC107845758/LOC107847415/LOC107861847/LOC107843129/LOC107858619/LOC107839536/LOC107853488/LOC107878340/LOC107864096/LOC107865075/LOC107838948/LOC107844759/LOC107839239/LOC107853524	sly:101247506/sly:778286/sly:101246650/sly:544052/sly:101258932/sly:101255033/sly:101251255/sly:101245503/sly:101246283/sly:101256428/sly:101258894/sly:544177/sly:101258686/sly:101266369/sly:100134880/sly:101244469/sly:544302/sly:101249428/sly:543537/sly:101265352/sly:101250231/sly:101244415/sly:543536/sly:101261642/sly:778330/sly:606304/sly:101249935	27	14	107850602/107864513/107853805/107862248/107842189/107847831/107847415/107861847/107843129/107858619/107839536/107853488/107878340/107839239	13	107840119/107839203/107845759/107839482/107840524/107840630/107838765/107845758/107864096/107865075/107838948/107844759/107853524
sly00910	Nitrogen metabolism	8/1189	24/4055	0.406261	0.999988	107860201/107870519/107867964/107864216/107860643/107875607/107855211/107842882	LOC107860201/LOC107870519/LOC107867964/LOC107864216/LOC107860643/LOC107875607/LOC107855211/LOC107842882	sly:101258424/sly:544275/sly:100736473/sly:101259288/sly:543803/sly:101259260/sly:101268239/sly:101257401	8	6	107870519/107867964/107864216/107875607/107855211/107842882	2	107860201/107860643
sly00511	Other glycan degradation	4/1189	4055-11-01	0.410515	0.999988	107863528/107843457/107847409/107839845	LOC107863528/LOC107843457/LOC107847409/LOC107839845	sly:101267007/sly:100529103/sly:101256611/sly:101261555	4	1	107839845	3	107863528/107843457/107847409
sly00400	Phenylalanine, tyrosine and tryptophan biosynthesis	14/1189	44/4055	0.412694	0.999988	107842110/107875636/107867463/107870781/107842830/107851006/107850308/107860819/107845682/107867808/107878340/107853897/107838948/107853524	LOC107842110/LOC107875636/LOC107867463/LOC107870781/LOC107842830/LOC107851006/LOC107850308/LOC107860819/LOC107845682/LOC107867808/LOC107878340/LOC107853897/LOC107838948/LOC107853524	sly:101259361/sly:101247331/sly:544153/sly:101265030/sly:101265440/sly:100736464/sly:544152/sly:101260492/sly:101256422/sly:543970/sly:101250231/sly:101260925/sly:101261642/sly:101249935	14	7	107842110/107875636/107867463/107851006/107845682/107867808/107878340	7	107870781/107842830/107850308/107860819/107853897/107838948/107853524
sly00770	Pantothenate and CoA biosynthesis	7/1189	21/4055	0.422142	0.999988	107847764/107847900/107852152/107852132/107850416/107860909/107851610	LOC107847764/LOC107847900/LOC107852152/LOC107852132/LOC107850416/LOC107860909/LOC107851610	sly:101263146/sly:778322/sly:101267567/sly:101267963/sly:101252944/sly:101261134/sly:101246107	7	4	107847764/107847900/107852152/107860909	3	107852132/107850416/107851610
sly00950	Isoquinoline alkaloid biosynthesis	7/1189	21/4055	0.422142	0.999988	107851006/107842494/107878340/107865520/107838948/107876335/107853524	LOC107851006/LOC107842494/LOC107878340/LOC107865520/LOC107838948/LOC107876335/LOC107853524	sly:100736464/sly:101244707/sly:101250231/sly:101254423/sly:101261642/sly:543808/sly:101249935	7	4	107851006/107878340/107865520/107876335	3	107842494/107838948/107853524
sly00380	Tryptophan metabolism	9/1189	28/4055	0.440884	0.999988	107859787/107843343/107873630/107842494/107878086/107861847/107863974/107842047/107852754	LOC107859787/LOC107843343/LOC107873630/LOC107842494/LOC107878086/LOC107861847/LOC107863974/LOC107842047/LOC107852754	sly:543585/sly:104644402/sly:101260940/sly:101244707/sly:101262830/sly:101244469/sly:101261658/sly:101267265/sly:101247616	9	4	107873630/107878086/107861847/107842047	5	107859787/107843343/107842494/107863974/107852754
sly04120	Ubiquitin mediated proteolysis	31/1189	103/4055	0.468221	0.999988	107845380/107850670/107859035/107840439/107841216/107845146/107854682/107849675/107858665/novel.2593/107842184/107845424/107878578/107848069/107862509/107875215/107864781/novel.2132/107858524/107878858/107839205/107873058/107875818/107864869/107873729/107839033/107878629/107875201/107842722/107841361/107875859	LOC107845380/LOC107850670/LOC107859035/LOC107840439/LOC107841216/LOC107845146/LOC107854682/LOC107849675/LOC107858665/-/LOC107842184/LOC107845424/LOC107878578/LOC107848069/LOC107862509/LOC107875215/LOC107864781/-/LOC107858524/LOC107878858/LOC107839205/LOC107873058/LOC107875818/LOC107864869/LOC107873729/LOC107839033/LOC107878629/LOC107875201/LOC107842722/LOC107841361/LOC107875859	sly:101260872/sly:101249698/sly:101260503/sly:101267748/sly:101252115/sly:101265083/sly:101249877/sly:101259391/sly:101260701/sly:101264868/sly:543547/sly:101254242/sly:778329/sly:101261295/sly:101250809/sly:101247534/sly:101253514/sly:101258213/sly:101267195/sly:101264951/sly:101265863/sly:101266831/sly:544292/sly:101244602/sly:101245577/sly:101253813/sly:101246723/sly:101263446/sly:101265575/sl…	31	18	107845380/107850670/107859035/107840439/107845146/107858665/107842184/107845424/107878578/107862509/107864781/107878858/107839205/107875818/107878629/107875201/107842722/107875859	13	107841216/107854682/107849675/novel.2593/107848069/107875215/novel.2132/107858524/107873058/107864869/107873729/107839033/107841361
sly00480	Glutathione metabolism	25/1189	83/4055	0.477743	0.999988	107864929/107866830/107854335/107861040/107873361/107858803/107842864/107875145/107856402/107868078/107843765/107847831/107873717/107859660/107866415/107842932/107873435/107868504/novel.834/107861273/107839536/107865075/107851197/107860662/107867450	LOC107864929/LOC107866830/LOC107854335/LOC107861040/LOC107873361/LOC107858803/LOC107842864/LOC107875145/LOC107856402/LOC107868078/LOC107843765/LOC107847831/LOC107873717/LOC107859660/LOC107866415/LOC107842932/LOC107873435/LOC107868504/-/LOC107861273/LOC107839536/LOC107865075/LOC107851197/LOC107860662/LOC107867450	sly:544197/sly:544209/sly:101248761/sly:101267923/sly:778229/sly:101268216/sly:101266750/sly:101268500/sly:101244300/sly:778341/sly:101258000/sly:544177/sly:101256384/sly:101263072/sly:101261142/sly:101258987/sly:778224/sly:101253589/sly:101261142/sly:101265881/sly:543537/sly:543536/sly:101258241/sly:101255848/sly:101263901	25	17	107864929/107866830/107854335/107861040/107858803/107842864/107875145/107847831/107873717/107859660/107842932/107873435/107868504/107861273/107839536/107851197/107860662	8	107873361/107856402/107868078/107843765/107866415/novel.834/107865075/107867450
sly00600	Sphingolipid metabolism	7/1189	22/4055	0.477769	0.999988	107862365/107838845/107871279/107873887/107847409/107839845/107868370	LOC107862365/LOC107838845/LOC107871279/LOC107873887/LOC107847409/LOC107839845/LOC107868370	sly:778364/sly:101244511/sly:101257860/sly:101246439/sly:101256611/sly:101261555/sly:101251446	7	4	107862365/107838845/107839845/107868370	3	107871279/107873887/107847409
sly03060	Protein export	12/1189	39/4055	0.48128	0.999988	107847655/107847826/107843250/107840647/107851499/107875863/107841771/107878553/107873338/107853328/107839416/107855786	LOC107847655/LOC107847826/LOC107843250/LOC107840647/LOC107851499/LOC107875863/LOC107841771/LOC107878553/LOC107873338/LOC107853328/LOC107839416/LOC107855786	sly:101257139/sly:101248267/sly:101251215/sly:101250048/sly:101254464/sly:101243898/sly:101262891/sly:101266091/sly:101257600/sly:101248563/sly:101261162/sly:101266477	12	5	107847826/107875863/107841771/107839416/107855786	7	107847655/107843250/107840647/107851499/107878553/107873338/107853328
sly00510	N-Glycan biosynthesis	12/1189	40/4055	0.522275	0.999988	107860690/107844374/107870753/107844499/107860595/107845131/107843045/107844599/107861255/107878105/107870013/107862527	LOC107860690/LOC107844374/LOC107870753/LOC107844499/LOC107860595/LOC107845131/LOC107843045/LOC107844599/LOC107861255/LOC107878105/LOC107870013/LOC107862527	sly:101260885/sly:101247658/sly:101268683/sly:543798/sly:101266287/sly:101261758/sly:101252919/sly:101253423/sly:101261568/sly:101259650/sly:101256171/sly:101250940	12	7	107860690/107870753/107845131/107843045/107844599/107878105/107862527	5	107844374/107844499/107860595/107861255/107870013
sly00100	Steroid biosynthesis	9/1189	30/4055	0.536449	0.999988	107875679/107860934/107859691/107851175/107857986/107866563/107867693/107843908/107858990	LOC107875679/LOC107860934/LOC107859691/LOC107851175/LOC107857986/LOC107866563/LOC107867693/LOC107843908/LOC107858990	sly:101256596/sly:101256156/sly:101256443/sly:100301930/sly:101254144/sly:101262546/sly:100147715/sly:101255254/sly:101244831	9	3	107875679/107860934/107858990	6	107859691/107851175/107857986/107866563/107867693/107843908
sly03008	Ribosome biogenesis in eukaryotes	20/1189	68/4055	0.539795	0.999988	107850743/107850889/107855501/107867739/107871401/107863533/107858476/107878901/107853754/107858602/107860209/107848351/107874054/107846487/107843833/107866882/107855472/107839710/107861877/107875330	LOC107850743/LOC107850889/LOC107855501/LOC107867739/LOC107871401/LOC107863533/LOC107858476/LOC107878901/LOC107853754/LOC107858602/LOC107860209/LOC107848351/LOC107874054/LOC107846487/LOC107843833/LOC107866882/LOC107855472/LOC107839710/LOC107861877/LOC107875330	sly:101248085/sly:101253905/sly:101268734/sly:101258362/sly:101255995/sly:101267297/sly:101255078/sly:101258878/sly:101246325/sly:101247688/sly:101256338/sly:101055607/sly:101249952/sly:101253657/sly:101256636/sly:101258556/sly:101259128/sly:101250547/sly:101252265/sly:101245772	20	18	107850743/107850889/107855501/107871401/107863533/107858476/107878901/107853754/107858602/107860209/107848351/107874054/107846487/107866882/107855472/107839710/107861877/107875330	2	107867739/107843833
sly00020	Citrate cycle (TCA cycle)	15/1189	51/4055	0.547627	0.999988	107840119/107862248/107859795/107870847/107867324/107847937/107843004/107860713/107864063/107843119/107858619/107859955/107855661/107844759/107860662	LOC107840119/LOC107862248/LOC107859795/LOC107870847/LOC107867324/LOC107847937/LOC107843004/LOC107860713/LOC107864063/LOC107843119/LOC107858619/LOC107859955/LOC107855661/LOC107844759/LOC107860662	sly:778286/sly:101258932/sly:101253647/sly:101253277/sly:543812/sly:101254693/sly:101246135/sly:100736507/sly:101265278/sly:101249011/sly:101249428/sly:101256641/sly:101260902/sly:778330/sly:101255848	15	13	107862248/107859795/107870847/107867324/107847937/107843004/107860713/107864063/107843119/107858619/107859955/107855661/107860662	2	107840119/107844759
sly00290	Valine, leucine and isoleucine biosynthesis	6/1189	20/4055	0.557634	0.999988	107850416/107860909/107864577/107844443/107841728/107851945	LOC107850416/LOC107860909/LOC107864577/LOC107844443/LOC107841728/LOC107851945	sly:101252944/sly:101261134/sly:101244614/sly:100037737/sly:543983/sly:101251907	6	2	107860909/107864577	4	107850416/107844443/107841728/107851945
sly00591	Linoleic acid metabolism	4/1189	13/4055	0.558267	0.999988	107861665/107843908/107841392/107858689	LOC107861665/LOC107843908/LOC107841392/LOC107858689	sly:544009/sly:101255254/sly:101244618/sly:543818	4	1	107861665	3	107843908/107841392/107858689
sly00740	Riboflavin metabolism	4/1189	13/4055	0.558267	0.999988	107840068/107862848/107848460/107870529	LOC107840068/LOC107862848/LOC107848460/LOC107870529	sly:544238/sly:101249252/sly:101263281/sly:101260420	4	3	107840068/107862848/107870529	1	107848460
sly04146	Peroxisome	23/1189	79/4055	0.559371	0.999988	107859787/novel.6665/107878690/107842456/107871101/107861683/107868096/107860091/107842480/107855307/107845294/107857656/107839318/107843433/107851423/107840191/107872660/107861908/107838817/107853104/107860662/107871348/107841645	LOC107859787/-/LOC107878690/LOC107842456/LOC107871101/LOC107861683/LOC107868096/LOC107860091/LOC107842480/LOC107855307/LOC107845294/LOC107857656/LOC107839318/LOC107843433/LOC107851423/LOC107840191/LOC107872660/LOC107861908/LOC107838817/LOC107853104/LOC107860662/LOC107871348/LOC107841645	sly:543585/sly:101252586/sly:101247444/sly:101262853/sly:101256779/sly:101256164/sly:101255436/sly:101264774/sly:544054/sly:101257097/sly:101251822/sly:101255253/sly:101246288/sly:101250354/sly:101257154/sly:101243643/sly:101266867/sly:101251367/sly:101246162/sly:101248304/sly:101255848/sly:101252586/sly:101259975	23	16	107842456/107871101/107860091/107842480/107855307/107845294/107857656/107839318/107851423/107840191/107872660/107861908/107838817/107853104/107860662/107871348	7	107859787/novel.6665/107878690/107861683/107868096/107843433/107841645
sly01210	2-Oxocarboxylic acid metabolism	14/1189	48/4055	0.564284	0.999988	107859795/107838765/107843119/107850416/107865960/107861641/107860909/107864577/107840659/107855661/107851945/107838948/107860662/107858598	LOC107859795/LOC107838765/LOC107843119/LOC107850416/LOC107865960/LOC107861641/LOC107860909/LOC107864577/LOC107840659/LOC107855661/LOC107851945/LOC107838948/LOC107860662/LOC107858598	sly:101253647/sly:101258686/sly:101249011/sly:101252944/sly:101245573/sly:101246328/sly:101261134/sly:101244614/sly:543751/sly:101260902/sly:101251907/sly:101261642/sly:101255848/sly:101244179	14	9	107859795/107843119/107865960/107861641/107860909/107864577/107855661/107860662/107858598	5	107838765/107850416/107840659/107851945/107838948
sly00460	Cyanoamino acid metabolism	9/1189	31/4055	0.581951	0.999988	107839921/107839203/107859563/107860120/107860201/107838905/107864787/107855205/107858598	LOC107839921/LOC107839203/LOC107859563/LOC107860120/LOC107860201/LOC107838905/LOC107864787/LOC107855205/LOC107858598	sly:101250548/sly:101255033/sly:101257526/sly:101254439/sly:101258424/sly:101248330/sly:543698/sly:100191127/sly:101244179	9	4	107839921/107859563/107855205/107858598	5	107839203/107860120/107860201/107838905/107864787
sly00350	Tyrosine metabolism	11/1189	39/4055	0.621039	0.999988	107851006/107842494/107851284/107878340/107840829/107865520/107853897/107838948/107869516/107876335/107853524	LOC107851006/LOC107842494/LOC107851284/LOC107878340/LOC107840829/LOC107865520/LOC107853897/LOC107838948/LOC107869516/LOC107876335/LOC107853524	sly:100736464/sly:101244707/sly:101254443/sly:101250231/sly:101252984/sly:101254423/sly:101260925/sly:101261642/sly:101244075/sly:543808/sly:101249935	11	6	107851006/107851284/107878340/107865520/107869516/107876335	5	107842494/107840829/107853897/107838948/107853524
sly00670	One carbon pool by folate	5/1189	18/4055	0.644571	0.999988	107839921/107859603/107860120/107860102/107870346	LOC107839921/LOC107859603/LOC107860120/LOC107860102/LOC107870346	sly:101250548/sly:101249137/sly:101254439/sly:101261082/sly:100316897	5	1	107839921	4	107859603/107860120/107860102/107870346
sly00330	Arginine and proline metabolism	13/1189	47/4055	0.653175	0.999988	107840486/107859655/107866830/107843343/107860213/107855493/107851501/107847831/107878076/107847415/107858927/107840963/107838948	LOC107840486/LOC107859655/LOC107866830/LOC107843343/LOC107860213/LOC107855493/LOC107851501/LOC107847831/LOC107878076/LOC107847415/LOC107858927/LOC107840963/LOC107838948	sly:543960/sly:101264170/sly:544209/sly:104644402/sly:101254254/sly:101268445/sly:101245118/sly:544177/sly:101252005/sly:100134880/sly:101261090/sly:101266198/sly:101261642	13	9	107840486/107859655/107866830/107860213/107855493/107847831/107847415/107858927/107840963	4	107843343/107851501/107878076/107838948
sly00073	Cutin, suberine and wax biosynthesis	6/1189	22/4055	0.662103	0.999988	107844188/107876102/107868096/107851578/107879240/107838799	LOC107844188/LOC107876102/LOC107868096/LOC107851578/LOC107879240/LOC107838799	sly:101267934/sly:101249297/sly:101255436/sly:101268663/sly:101262353/sly:101245281	6	4	107844188/107876102/107851578/107838799	2	107868096/107879240
sly00500	Starch and sucrose metabolism	33/1189	118/4055	0.662655	0.999988	107863145/107863475/107864313/107866823/107864541/107852961/107840883/107859190/107867836/107859563/107860137/107859646/107841023/107850962/107842585/107854535/107858464/107838770/107838905/107851586/107878413/107871051/107864787/107877529/107869091/107855766/107875763/107840421/107855205/107867882/107863104/107876107/107864053	LOC107863145/LOC107863475/LOC107864313/LOC107866823/LOC107864541/LOC107852961/LOC107840883/LOC107859190/LOC107867836/LOC107859563/LOC107860137/LOC107859646/LOC107841023/LOC107850962/LOC107842585/LOC107854535/LOC107858464/LOC107838770/LOC107838905/LOC107851586/LOC107878413/LOC107871051/LOC107864787/LOC107877529/LOC107869091/LOC107855766/LOC107875763/LOC107840421/LOC107855205/LOC107867882/LOC107863…	sly:101250960/sly:101259777/sly:101055573/sly:101250886/sly:100736451/sly:101247621/sly:543961/sly:101245612/sly:101254670/sly:101257526/sly:101249596/sly:101266782/sly:544039/sly:101248935/sly:101244113/sly:543710/sly:101253841/sly:101259279/sly:101248330/sly:101263696/sly:101267327/sly:543996/sly:543698/sly:100135703/sly:101253815/sly:100316881/sly:544022/sly:544283/sly:100191127/sly:101252851/…	33	19	107863145/107863475/107866823/107864541/107852961/107840883/107859190/107867836/107859563/107860137/107850962/107842585/107851586/107871051/107875763/107840421/107855205/107867882/107863104	14	107864313/107859646/107841023/107854535/107858464/107838770/107838905/107878413/107864787/107877529/107869091/107855766/107876107/107864053
sly00564	Glycerophospholipid metabolism	25/1189	90/4055	0.666252	0.999988	107878499/107860821/107855115/107872465/107866274/107854912/107868461/107873315/107858892/107876040/107842339/107870033/novel.2320/107865980/107862289/107872293/107852341/107843908/107851383/107867147/107860088/107876031/107864626/107879269/107848429	LOC107878499/LOC107860821/LOC107855115/LOC107872465/LOC107866274/LOC107854912/LOC107868461/LOC107873315/LOC107858892/LOC107876040/LOC107842339/LOC107870033/-/LOC107865980/LOC107862289/LOC107872293/LOC107852341/LOC107843908/LOC107851383/LOC107867147/LOC107860088/LOC107876031/LOC107864626/LOC107879269/LOC107848429	sly:101247838/sly:101261081/sly:101262422/sly:101257361/sly:544181/sly:101264154/sly:101259812/sly:101253092/sly:101264888/sly:101266950/sly:101261489/sly:101260923/sly:543681/sly:101246167/sly:101256961/sly:101257357/sly:544251/sly:101255254/sly:101243786/sly:101261812/sly:101260497/sly:543819/sly:101244032/sly:101265364/sly:544171	25	14	107878499/107860821/107855115/107872465/107866274/107854912/107858892/107876040/107862289/107872293/107851383/107876031/107864626/107879269	11	107868461/107873315/107842339/107870033/novel.2320/107865980/107852341/107843908/107867147/107860088/107848429
sly00410	beta-Alanine metabolism	10/1189	37/4055	0.680583	0.999988	107859655/107850578/107847831/107852152/107878076/107857656/107865520/107840963/107876335/107843407	LOC107859655/LOC107850578/LOC107847831/LOC107852152/LOC107878076/LOC107857656/LOC107865520/LOC107840963/LOC107876335/LOC107843407	sly:101264170/sly:100147722/sly:544177/sly:101267567/sly:101252005/sly:101255253/sly:101254423/sly:101266198/sly:543808/sly:101248347	10	9	107859655/107850578/107847831/107852152/107857656/107865520/107840963/107876335/107843407	1	107878076
sly00592	alpha-Linolenic acid metabolism	10/1189	37/4055	0.680583	0.999988	107861665/107854684/107867080/107850386/107842456/107839143/107869411/107877738/107843433/107843908	LOC107861665/LOC107854684/LOC107867080/LOC107850386/LOC107842456/LOC107839143/LOC107869411/LOC107877738/LOC107843433/LOC107843908	sly:544009/sly:544306/sly:606711/sly:101251665/sly:101262853/sly:101261255/sly:101264819/sly:543763/sly:101250354/sly:101255254	10	8	107861665/107854684/107867080/107850386/107842456/107839143/107869411/107877738	2	107843433/107843908
sly04144	Endocytosis	41/1189	147/4055	0.681197	0.999988	107847805/107840559/107861758/107840494/107875543/107853717/107860039/107851527/107839862/107877979/107866274/107867978/107838962/107870215/107843415/107875128/107859864/107842981/107870570/107859562/107851820/107839935/107870749/107870162/107838904/107859013/107859654/107861872/107875647/107878757/107852341/107839855/107858497/107878256/novel.1811/107868199/107876031/107847347/107876154/10787926…	LOC107847805/LOC107840559/LOC107861758/LOC107840494/LOC107875543/LOC107853717/LOC107860039/LOC107851527/LOC107839862/LOC107877979/LOC107866274/LOC107867978/LOC107838962/LOC107870215/LOC107843415/LOC107875128/LOC107859864/LOC107842981/LOC107870570/LOC107859562/LOC107851820/LOC107839935/LOC107870749/LOC107870162/LOC107838904/LOC107859013/LOC107859654/LOC107861872/LOC107875647/LOC107878757/LOC107852…	sly:101258366/sly:101263355/sly:101247200/sly:101265874/sly:100736433/sly:101248300/sly:101246301/sly:101259697/sly:101265681/sly:101265657/sly:544181/sly:101251739/sly:101266053/sly:101055596/sly:101267950/sly:101260383/sly:101263663/sly:101251611/sly:101254375/sly:101258121/sly:101258647/sly:101254537/sly:101266058/sly:101247904/sly:101264460/sly:104645908/sly:101265393/sly:101251365/sly:101256…	41	30	107847805/107840559/107861758/107840494/107875543/107860039/107851527/107877979/107866274/107870215/107843415/107859864/107870570/107859562/107839935/107870162/107838904/107859013/107859654/107861872/107875647/107878757/107839855/107858497/107868199/107876031/107847347/107876154/107879269/107872889	11	107853717/107839862/107867978/107838962/107875128/107842981/107851820/107870749/107852341/107878256/novel.1811
sly04933	AGE-RAGE signaling pathway in diabetic complications	4/1189	15/4055	0.683397	0.999988	107864327/107868196/107873209/107842366	LOC107864327/LOC107868196/LOC107873209/LOC107842366	sly:100301919/sly:101244348/sly:100301922/sly:100301941	4	1	107864327	3	107868196/107873209/107842366
sly04130	SNARE interactions in vesicular transport	9/1189	34/4055	0.704229	0.999988	107846179/107843713/107852786/107872818/107850543/107864073/107858585/novel.1807/107839103	LOC107846179/LOC107843713/LOC107852786/LOC107872818/LOC107850543/LOC107864073/LOC107858585/-/LOC107839103	sly:101262338/sly:101247381/sly:101251106/sly:101264019/sly:101261994/sly:101263154/sly:101246592/sly:101259553/sly:101250531	9	4	107846179/107843713/107850543/107839103	5	107852786/107872818/107864073/107858585/novel.1807
sly00905	Brassinosteroid biosynthesis	3/1189	4055-12-01	0.730966	0.999988	107860427/107859954/107861879	LOC107860427/LOC107859954/LOC107861879	sly:100037489/sly:101256342/sly:100736544	3	1	107861879	2	107860427/107859954
sly03015	mRNA surveillance pathway	29/1189	109/4055	0.767773	0.999988	107862553/107850911/107863384/107875901/107851101/107871367/107861910/107871351/107870112/107843339/107873196/107859884/107847874/107842644/107843589/107848129/107847405/107840594/107856873/107870910/novel.4691/107870705/107853425/107839054/107867321/107876108/107878033/107850914/107868902	LOC107862553/LOC107850911/LOC107863384/LOC107875901/LOC107851101/LOC107871367/LOC107861910/LOC107871351/LOC107870112/LOC107843339/LOC107873196/LOC107859884/LOC107847874/LOC107842644/LOC107843589/LOC107848129/LOC107847405/LOC107840594/LOC107856873/LOC107870910/-/LOC107870705/LOC107853425/LOC107839054/LOC107867321/LOC107876108/LOC107878033/LOC107850914/LOC107868902	sly:101252047/sly:101251957/sly:101244332/sly:101256096/sly:101256441/sly:101246720/sly:101244963/sly:101251680/sly:101260528/sly:101262878/sly:101249463/sly:101258611/sly:101257170/sly:101263053/sly:101268818/sly:101245749/sly:101253276/sly:101256045/sly:101259365/sly:101244838/sly:101252047/sly:101260240/sly:101251329/sly:101263044/sly:101249356/sly:101247241/sly:101257003/sly:101260293/sly:101…	29	18	107862553/107850911/107851101/107861910/107871351/107843339/107873196/107859884/107847874/107847405/107840594/107856873/107853425/107839054/107867321/107876108/107878033/107868902	11	107863384/107875901/107871367/107870112/107842644/107843589/107848129/107870910/novel.4691/107870705/107850914
sly00062	Fatty acid elongation	9/1189	36/4055	0.771657	0.999988	107872813/107864657/107839065/107858717/107846933/107873145/107870144/107839042/107847631	LOC107872813/LOC107864657/LOC107839065/LOC107858717/LOC107846933/LOC107873145/LOC107870144/LOC107839042/LOC107847631	sly:101246151/sly:101262858/sly:101244691/sly:101248828/sly:101260402/sly:101250807/sly:101245050/sly:101266659/sly:101252875	9	8	107872813/107864657/107839065/107858717/107873145/107870144/107839042/107847631	1	107846933
sly00565	Ether lipid metabolism	6/1189	25/4055	0.786634	0.999988	107866274/107865980/107852341/107843908/107876031/107879269	LOC107866274/LOC107865980/LOC107852341/LOC107843908/LOC107876031/LOC107879269	sly:544181/sly:101246167/sly:544251/sly:101255254/sly:543819/sly:101265364	6	3	107866274/107876031/107879269	3	107865980/107852341/107843908
sly00940	Phenylpropanoid biosynthesis	28/1189	107/4055	0.79656	0.999988	107843092/107863937/107875407/107862932/107844729/107862076/107863896/107854291/107860278/107875625/107851630/107859563/107868752/107860047/107854094/107862991/107860206/107838905/107852745/107861887/107872642/107869755/107864787/107840863/107859012/107851884/107844023/107855205	LOC107843092/LOC107863937/LOC107875407/LOC107862932/LOC107844729/LOC107862076/LOC107863896/LOC107854291/LOC107860278/LOC107875625/LOC107851630/LOC107859563/LOC107868752/LOC107860047/LOC107854094/LOC107862991/LOC107860206/LOC107838905/LOC107852745/LOC107861887/LOC107872642/LOC107869755/LOC107864787/LOC107840863/LOC107859012/LOC107851884/LOC107844023/LOC107855205	sly:101243922/sly:101249824/sly:101244196/sly:101251363/sly:101261765/sly:101249624/sly:101248236/sly:101243656/sly:101265690/sly:101244961/sly:101260194/sly:101257526/sly:101253377/sly:101254970/sly:101245316/sly:101251452/sly:101257228/sly:101248330/sly:101248973/sly:101254287/sly:101249969/sly:101255909/sly:543698/sly:544249/sly:101265606/sly:100191129/sly:101262367/sly:100191127	28	24	107843092/107863937/107875407/107862932/107844729/107862076/107863896/107854291/107860278/107875625/107851630/107859563/107868752/107854094/107862991/107860206/107852745/107861887/107872642/107869755/107840863/107851884/107844023/107855205	4	107860047/107838905/107864787/107859012
sly03050	Proteasome	10/1189	41/4055	0.806081	0.999988	107871486/107864037/107878433/107854199/107844049/107867138/107878375/107877889/107864141/107839083	LOC107871486/LOC107864037/LOC107878433/LOC107854199/LOC107844049/LOC107867138/LOC107878375/LOC107877889/LOC107864141/LOC107839083	sly:101250118/sly:101249287/sly:101247839/sly:101244518/sly:101256141/sly:101259629/sly:101252199/sly:101258384/sly:101249580/sly:101267619	10	10	107871486/107864037/107878433/107854199/107844049/107867138/107878375/107877889/107864141/107839083	0
sly00220	Arginine biosynthesis	7/1189	30/4055	0.821305	0.999988	107868058/107870519/107865960/107861641/107867374/107840659/107838948	LOC107868058/LOC107870519/LOC107865960/LOC107861641/LOC107867374/LOC107840659/LOC107838948	sly:101264119/sly:544275/sly:101245573/sly:101246328/sly:101255089/sly:543751/sly:101261642	7	4	107870519/107865960/107861641/107867374	3	107868058/107840659/107838948
sly00590	Arachidonic acid metabolism	3/1189	14/4055	0.826039	0.999988	107864929/107866862/107843908	LOC107864929/LOC107866862/LOC107843908	sly:544197/sly:101268179/sly:101255254	3	2	107864929/107866862	1	107843908
sly04122	Sulfur relay system	2/1189	4055-10-01	0.840175	0.999988	107859361/107871449	LOC107859361/LOC107871449	sly:101247277/sly:101268304	2	1	107871449	1	107859361
sly00650	Butanoate metabolism	5/1189	23/4055	0.849437	0.999988	107850578/107861722/107878086/107850416/107841645	LOC107850578/LOC107861722/LOC107878086/LOC107850416/LOC107841645	sly:100147722/sly:100147725/sly:101262830/sly:101252944/sly:101259975	5	2	107850578/107878086	3	107861722/107850416/107841645
sly00450	Selenocompound metabolism	3/1189	15/4055	0.861699	0.999988	novel.3884/107853488/107864673	-/LOC107853488/LOC107864673	sly:101254039/sly:101265352/sly:101259979	3	2	107853488/107864673	1	novel.3884
sly03020	RNA polymerase	7/1189	32/4055	0.871458	0.999988	107873487/107843815/107869967/107838856/107875698/107873112/107854235	LOC107873487/LOC107843815/LOC107869967/LOC107838856/LOC107875698/LOC107873112/LOC107854235	sly:101259753/sly:101260591/sly:101255881/sly:101261746/sly:101264016/sly:101267531/sly:101258274	7	5	107873487/107843815/107838856/107875698/107873112	2	107869967/107854235
sly01040	Biosynthesis of unsaturated fatty acids	3/1189	16/4055	0.890767	0.999988	107842456/107870144/107843433	LOC107842456/LOC107870144/LOC107843433	sly:101262853/sly:101245050/sly:101250354	3	2	107842456/107870144	1	107843433
sly00790	Folate biosynthesis	4/1189	21/4055	0.904277	0.999988	107840068/107848460/107854219/107847437	LOC107840068/LOC107848460/LOC107854219/LOC107847437	sly:544238/sly:101263281/sly:101250507/sly:101263512	4	1	107840068	3	107848460/107854219/107847437
sly02010	ABC transporters	4/1189	21/4055	0.904277	0.999988	107870255/107855112/107870765/107870035	LOC107870255/LOC107855112/LOC107870765/LOC107870035	sly:101265632/sly:101262724/sly:101247740/sly:101266927	4	4	107870255/107855112/107870765/107870035	0
sly00240	Pyrimidine metabolism	11/1189	50/4055	0.906394	0.999988	107875281/107844226/107852748/107852152/107840887/107874589/107875867/107868716/107859195/107861725/107863492	LOC107875281/LOC107844226/LOC107852748/LOC107852152/LOC107840887/LOC107874589/LOC107875867/LOC107868716/LOC107859195/LOC107861725/LOC107863492	sly:101255711/sly:101243930/sly:101249548/sly:101267567/sly:101247459/sly:101255503/sly:101262221/sly:101259471/sly:101249602/sly:101263094/sly:101267587	11	7	107844226/107852152/107840887/107874589/107868716/107859195/107861725	4	107875281/107852748/107875867/107863492
sly00430	Taurine and hypotaurine metabolism	2/1189	4055-12-01	0.907433	0.999988	107850578/107862372	LOC107850578/LOC107862372	sly:100147722/sly:101267102	2	1	107850578	1	107862372
sly00531	Glycosaminoglycan degradation	2/1189	4055-12-01	0.907433	0.999988	107843457/107843440	LOC107843457/LOC107843440	sly:100529103/sly:101256537	2	0		2	107843457/107843440
sly00061	Fatty acid biosynthesis	7/1189	35/4055	0.924432	0.999988	107871444/107850244/107841760/107855307/107839318/107862888/107846207	LOC107871444/LOC107850244/LOC107841760/LOC107855307/LOC107839318/LOC107862888/LOC107846207	sly:543869/sly:101250973/sly:101245130/sly:101257097/sly:101246288/sly:101249057/sly:101249116	7	5	107850244/107841760/107855307/107839318/107862888	2	107871444/107846207
sly03040	Spliceosome	38/1189	155/4055	0.925591	0.999988	107848904/novel.444/107875543/107839862/107855025/107870215/107866982/107859716/107863693/107864215/107870012/107839625/107858560/107843339/107847383/107838706/107842067/107854276/107842728/107870421/107858861/107840032/107877847/107847326/107859949/107847634/107843739/107843023/107862291/107859021/107848164/107863009/107853990/107847347/107843221/107863914/107870199/107847671	LOC107848904/-/LOC107875543/LOC107839862/LOC107855025/LOC107870215/LOC107866982/LOC107859716/LOC107863693/LOC107864215/LOC107870012/LOC107839625/LOC107858560/LOC107843339/LOC107847383/LOC107838706/LOC107842067/LOC107854276/LOC107842728/LOC107870421/LOC107858861/LOC107840032/LOC107877847/LOC107847326/LOC107859949/LOC107847634/LOC107843739/LOC107843023/LOC107862291/LOC107859021/LOC107848164/LOC1078…	sly:101259321/sly:100134885/sly:100736433/sly:101265681/sly:101265451/sly:101055596/sly:101254580/sly:101246043/sly:101261205/sly:101258490/sly:101256472/sly:101257012/sly:101250657/sly:101262878/sly:101253282/sly:101267636/sly:101246661/sly:101248804/sly:101258585/sly:101250296/sly:101267079/sly:101257217/sly:101257670/sly:101264721/sly:101254653/sly:101246991/sly:101254436/sly:101266446/sly:101…	38	22	107848904/107875543/107870215/107866982/107864215/107839625/107843339/107838706/107842728/107870421/107840032/107847326/107847634/107843739/107843023/107862291/107848164/107863009/107853990/107847347/107843221/107863914	16	novel.444/107839862/107855025/107859716/107863693/107870012/107858560/107847383/107842067/107854276/107858861/107877847/107859949/107859021/107870199/107847671
sly00310	Lysine degradation	6/1189	31/4055	0.92769	0.999988	107878086/novel.511/107852488/107875209/107872914/107878272	LOC107878086/-/LOC107852488/LOC107875209/LOC107872914/LOC107878272	sly:101262830/sly:101245641/sly:101245641/sly:101250245/sly:101247436/sly:101244888	6	5	107878086/107852488/107875209/107872914/107878272	1	novel.511
sly00250	Alanine, aspartate and glutamate metabolism	8/1189	40/4055	0.934791	0.999988	107854073/107857603/107850578/107870519/107861641/107863696/107867374/107838948	LOC107854073/LOC107857603/LOC107850578/LOC107870519/LOC107861641/LOC107863696/LOC107867374/LOC107838948	sly:101258487/sly:101253148/sly:100147722/sly:544275/sly:101246328/sly:101264098/sly:101255089/sly:101261642	8	5	107854073/107850578/107870519/107861641/107867374	3	107857603/107863696/107838948
sly03410	Base excision repair	7/1189	37/4055	0.94813	0.999988	107845534/107869722/107843734/107871275/107859781/107875498/107857607	LOC107845534/LOC107869722/LOC107843734/LOC107871275/LOC107859781/LOC107875498/LOC107857607	sly:101258999/sly:101254462/sly:101256637/sly:101251710/sly:101257131/sly:544248/sly:101255344	7	6	107845534/107843734/107871275/107859781/107875498/107857607	1	107869722
sly04145	Phagosome	16/1189	74/4055	0.948452	0.999988	107853469/107843763/107860145/107876583/107840802/107861644/107851820/107868196/107859654/107875863/107850543/107870845/novel.3365/107870646/107875500/107864404	LOC107853469/LOC107843763/LOC107860145/LOC107876583/LOC107840802/LOC107861644/LOC107851820/LOC107868196/LOC107859654/LOC107875863/LOC107850543/LOC107870845/-/LOC107870646/LOC107875500/LOC107864404	sly:101265829/sly:101248630/sly:101248155/sly:101260244/sly:101264594/sly:101246905/sly:101258647/sly:101244348/sly:101265393/sly:101243898/sly:101261994/sly:101263796/sly:101246756/sly:101260812/sly:101262728/sly:101265947	16	6	107860145/107861644/107859654/107875863/107850543/107864404	10	107853469/107843763/107876583/107840802/107851820/107868196/107870845/novel.3365/107870646/107875500
sly00071	Fatty acid degradation	9/1189	46/4055	0.952729	0.999988	107842456/107839143/107878086/107855307/107839318/107843433/107873287/107840829/107869516	LOC107842456/LOC107839143/LOC107878086/LOC107855307/LOC107839318/LOC107843433/LOC107873287/LOC107840829/LOC107869516	sly:101262853/sly:101261255/sly:101262830/sly:101257097/sly:101246288/sly:101250354/sly:101256710/sly:101252984/sly:101244075	9	6	107842456/107839143/107878086/107855307/107839318/107869516	3	107843433/107873287/107840829
sly03018	RNA degradation	20/1189	91/4055	0.956022	0.999988	107848258/107875683/107838901/107850743/107861912/107852751/107859743/107843197/107847543/107878064/107870339/107864528/107851138/107860664/107870082/novel.4860/107853990/107843221/107863914/107866882	LOC107848258/LOC107875683/LOC107838901/LOC107850743/LOC107861912/LOC107852751/LOC107859743/LOC107843197/LOC107847543/LOC107878064/LOC107870339/LOC107864528/LOC107851138/LOC107860664/LOC107870082/-/LOC107853990/LOC107843221/LOC107863914/LOC107866882	sly:101268737/sly:101258270/sly:101245783/sly:101248085/sly:101263393/sly:101250405/sly:101243936/sly:544068/sly:101252746/sly:101268121/sly:101257555/sly:101250927/sly:101268243/sly:101256146/sly:101253771/sly:101265516/sly:101256523/sly:101258986/sly:104649355/sly:101258556	20	15	107848258/107875683/107850743/107861912/107859743/107843197/107847543/107864528/107851138/107860664/107870082/107853990/107843221/107863914/107866882	5	107838901/107852751/107878064/107870339/novel.4860
sly01212	Fatty acid metabolism	12/1189	61/4055	0.96894	0.999988	107842456/107871444/107839143/107850244/107841760/107878086/107855307/107839318/107870144/107843433/107862888/107846207	LOC107842456/LOC107871444/LOC107839143/LOC107850244/LOC107841760/LOC107878086/LOC107855307/LOC107839318/LOC107870144/LOC107843433/LOC107862888/LOC107846207	sly:101262853/sly:543869/sly:101261255/sly:101250973/sly:101245130/sly:101262830/sly:101257097/sly:101246288/sly:101245050/sly:101250354/sly:101249057/sly:101249116	12	9	107842456/107839143/107850244/107841760/107878086/107855307/107839318/107870144/107862888	3	107871444/107843433/107846207
sly00300	Lysine biosynthesis	1/1189	4055-10-01	0.969037	0.999988	107838765	LOC107838765	sly:101258686	1	0		1	107838765
sly00909	Sesquiterpenoid and triterpenoid biosynthesis	1/1189	4055-10-01	0.969037	0.999988	107841776	LOC107841776	sly:100529102	1	1	107841776	0
sly04136	Autophagy - other	6/1189	36/4055	0.974184	0.999988	107843444/107870434/107870918/107878033/novel.2613/107868309	LOC107843444/LOC107870434/LOC107870918/LOC107878033/-/LOC107868309	sly:101266988/sly:101254295/sly:101259616/sly:101257003/sly:101246793/sly:101253062	6	4	107870434/107870918/107878033/107868309	2	107843444/novel.2613
sly00280	Valine, leucine and isoleucine degradation	8/1189	46/4055	0.979088	0.999988	107839576/107842456/107878086/107841325/107847843/107840271/107841645/107843407	LOC107839576/LOC107842456/LOC107878086/LOC107841325/LOC107847843/LOC107840271/LOC107841645/LOC107843407	sly:101245206/sly:101262853/sly:101262830/sly:543993/sly:101252846/sly:101262668/sly:101259975/sly:101248347	8	3	107842456/107878086/107843407	5	107839576/107841325/107847843/107840271/107841645
sly03430	Mismatch repair	6/1189	37/4055	0.979227	0.999988	107865808/107859401/107877977/107843734/107847917/107875498	LOC107865808/LOC107859401/LOC107877977/LOC107843734/LOC107847917/LOC107875498	sly:101267918/sly:101246010/sly:100462656/sly:101256637/sly:101251472/sly:544248	6	3	107865808/107843734/107875498	3	107859401/107877977/107847917
sly00040	Pentose and glucuronate interconversions	14/1189	73/4055	0.983102	0.999988	107862290/107878151/107861639/107859556/107862261/107861638/107850962/107867311/107843941/107860470/107842949/107842839/107842557/107869773	LOC107862290/LOC107878151/LOC107861639/LOC107859556/LOC107862261/LOC107861638/LOC107850962/LOC107867311/LOC107843941/LOC107860470/LOC107842949/LOC107842839/LOC107842557/LOC107869773	sly:101261402/sly:101246311/sly:101245743/sly:101260787/sly:101264109/sly:544016/sly:101248935/sly:101244576/sly:101250914/sly:101263958/sly:101244802/sly:101256514/sly:101261266/sly:101265207	14	8	107862290/107861639/107850962/107843941/107860470/107842949/107842839/107869773	6	107878151/107859556/107862261/107861638/107867311/107842557
sly00190	Oxidative phosphorylation	20/1189	99/4055	0.985911	0.999988	107859585/107870847/107877967/107842902/107840802/107860713/107851663/107847386/107855843/107859955/107839176/107847986/107857432/107875939/107860094/107878661/107862934/107850552/107870455/107864404	LOC107859585/LOC107870847/LOC107877967/LOC107842902/LOC107840802/LOC107860713/LOC107851663/LOC107847386/LOC107855843/LOC107859955/LOC107839176/LOC107847986/LOC107857432/LOC107875939/LOC107860094/LOC107878661/LOC107862934/LOC107850552/LOC107870455/LOC107864404	sly:101253342/sly:101253277/sly:101263827/sly:101266444/sly:101264594/sly:100736507/sly:101268533/sly:101261919/sly:101255896/sly:101256641/sly:101244808/sly:101246346/sly:101268593/sly:543660/sly:101264167/sly:101255513/sly:101244937/sly:101263481/sly:101255084/sly:101265947	20	12	107870847/107877967/107842902/107860713/107847386/107859955/107839176/107860094/107878661/107862934/107870455/107864404	8	107859585/107840802/107851663/107855843/107847986/107857432/107875939/107850552
sly03420	Nucleotide excision repair	10/1189	57/4055	0.986316	0.999988	107852603/107865808/107869722/107843734/107863662/107847917/107858809/107875498/107842722/107864765	LOC107852603/LOC107865808/LOC107869722/LOC107843734/LOC107863662/LOC107847917/LOC107858809/LOC107875498/LOC107842722/LOC107864765	sly:101252814/sly:101267918/sly:101254462/sly:101256637/sly:101251406/sly:101251472/sly:101260299/sly:544248/sly:101265575/sly:101253215	10	7	107852603/107865808/107843734/107858809/107875498/107842722/107864765	3	107869722/107863662/107847917
sly00340	Histidine metabolism	1/1189	13/4055	0.989105	0.999988	107853897	LOC107853897	sly:101260925	1	0		1	107853897
sly00640	Propanoate metabolism	5/1189	36/4055	0.991301	0.999988	107871444/107850244/107878086/107857656/107843407	LOC107871444/LOC107850244/LOC107878086/LOC107857656/LOC107843407	sly:543869/sly:101250973/sly:101262830/sly:101255253/sly:101248347	5	4	107850244/107878086/107857656/107843407	1	107871444
sly00563	Glycosylphosphatidylinositol (GPI)-anchor biosynthesis	2/1189	22/4055	0.995188	0.999988	107859837/107863855	LOC107859837/LOC107863855	sly:101248350/sly:101245572	2	0		2	107859837/107863855
sly03440	Homologous recombination	8/1189	55/4055	0.996914	0.999988	107847643/107843734/107847917/107866877/107870689/novel.1683/107850205/107871287	LOC107847643/LOC107843734/LOC107847917/LOC107866877/LOC107870689/-/LOC107850205/LOC107871287	sly:101262415/sly:101256637/sly:101251472/sly:101264320/sly:101266032/sly:101253578/sly:101267881/sly:101256382	8	4	107847643/107843734/novel.1683/107871287	4	107847917/107866877/107870689/107850205
sly04141	Protein processing in endoplasmic reticulum	34/1189	174/4055	0.998996	0.999988	107845380/107838718/107875543/107842861/107842196/107847826/107873433/107839862/107864375/107875274/107847930/107870215/107862224/107840482/107859097/107861257/107843113/107858767/107875203/107878146/107844499/107839821/107878126/107875863/107850876/107845131/107878858/107868237/107847347/107878074/107861255/107841934/107870906/107859628	LOC107845380/LOC107838718/LOC107875543/LOC107842861/LOC107842196/LOC107847826/LOC107873433/LOC107839862/LOC107864375/LOC107875274/LOC107847930/LOC107870215/LOC107862224/LOC107840482/LOC107859097/LOC107861257/LOC107843113/LOC107858767/LOC107875203/LOC107878146/LOC107844499/LOC107839821/LOC107878126/LOC107875863/LOC107850876/LOC107845131/LOC107878858/LOC107868237/LOC107847347/LOC107878074/LOC107861…	sly:101260872/sly:101250440/sly:100736433/sly:101263239/sly:101250189/sly:101248267/sly:101257158/sly:101265681/sly:101254944/sly:101253501/sly:101257830/sly:101055596/sly:101243872/sly:101248524/sly:101247183/sly:101256444/sly:101266255/sly:101251912/sly:101248688/sly:101251489/sly:543798/sly:101254946/sly:101254814/sly:101243898/sly:101258215/sly:101261758/sly:101264951/sly:101265008/sly:101255…	34	24	107845380/107838718/107875543/107842861/107842196/107847826/107870215/107840482/107861257/107843113/107858767/107875203/107878146/107839821/107878126/107875863/107850876/107845131/107878858/107868237/107847347/107841934/107870906/107859628	10	107873433/107839862/107864375/107875274/107847930/107862224/107859097/107844499/107878074/107861255
sly03030	DNA replication	5/1189	48/4055	0.999604	0.999988	107865808/107869722/107843734/107847917/107875498	LOC107865808/LOC107869722/LOC107843734/LOC107847917/LOC107875498	sly:101267918/sly:101254462/sly:101256637/sly:101251472/sly:544248	5	3	107865808/107843734/107875498	2	107869722/107847917
sly03013	RNA transport	23/1189	137/4055	0.999805	0.999988	107866023/107850889/107843339/107861846/107872972/107875700/107868097/107870843/107871382/107842644/novel.4898/107846383/107847405/107857627/107860098/107868670/107862820/107861662/107850315/107874054/107848199/107842629/107868902	LOC107866023/LOC107850889/LOC107843339/LOC107861846/LOC107872972/LOC107875700/LOC107868097/LOC107870843/LOC107871382/LOC107842644/-/LOC107846383/LOC107847405/LOC107857627/LOC107860098/LOC107868670/LOC107862820/LOC107861662/LOC107850315/LOC107874054/LOC107848199/LOC107842629/LOC107868902	sly:101247351/sly:101253905/sly:101262878/sly:101243871/sly:101244374/sly:101254930/sly:101262288/sly:101261101/sly:101268762/sly:101263053/sly:101253396/sly:101245721/sly:101253276/sly:101261276/sly:101262974/sly:101256616/sly:101265714/sly:101251762/sly:101266108/sly:101249952/sly:101265995/sly:101258299/sly:101257199	23	14	107866023/107850889/107843339/107861846/107872972/107875700/107846383/107847405/107857627/107861662/107874054/107848199/107842629/107868902	9	107868097/107870843/107871382/107842644/novel.4898/107860098/107868670/107862820/107850315
sly03010	Ribosome	38/1189	218/4055	0.999988	0.999988	107864968/107839182/107872788/107879536/107859367/107843747/107867075/107845732/107868310/107870335/107851116/107860650/107878639/107864058/107861832/107861286/107870624/107842126/107876878/107848528/107875392/107862020/107875394/107877503/107873353/novel.268/107871352/107851228/107876001/107843173/107875960/107863532/107859079/107845565/107843430/107848080/novel.5377/107878571	LOC107864968/LOC107839182/LOC107872788/LOC107879536/LOC107859367/LOC107843747/LOC107867075/LOC107845732/LOC107868310/LOC107870335/LOC107851116/LOC107860650/LOC107878639/LOC107864058/LOC107861832/LOC107861286/LOC107870624/LOC107842126/LOC107876878/LOC107848528/LOC107875392/LOC107862020/LOC107875394/LOC107877503/LOC107873353/-/LOC107871352/LOC107851228/LOC107876001/LOC107843173/LOC107875960/LOC1078…	sly:101244648/sly:101268719/sly:101250811/sly:101247851/sly:101255358/sly:101259299/sly:101246242/sly:101248722/sly:101245574/sly:101256669/sly:101248086/sly:101252943/sly:101261139/sly:101249844/sly:101264910/sly:101261681/sly:101254152/sly:101260624/sly:101254712/sly:101248825/sly:101267247/sly:101262501/sly:101266952/sly:778217/sly:101244736/sly:3950427/sly:101251184/sly:101250874/sly:10125240…	38	5	107877503/107873353/107876001/107843173/107859079	33	107864968/107839182/107872788/107879536/107859367/107843747/107867075/107845732/107868310/107870335/107851116/107860650/107878639/107864058/107861832/107861286/107870624/107842126/107876878/107848528/107875392/107862020/107875394/novel.268/107871352/107851228/107875960/107863532/107845565/107843430/107848080/novel.5377/107878571

## Sheet: cc12vscc0_KEGGenrich
KEGGID	Description	GeneRatio	BgRatio	pvalue	padj	geneID	geneName	keggID	Count	Up	Up_Gene_names	Down	Down_Gene_names
sly00860	Porphyrin and chlorophyll metabolism	28/1472	45/4048	0.000348085	0.0400298	107838934/107862250/107862118/107878895/107844048/107870073/107867750/107867325/107845435/107842746/107845383/107856090/107840071/107851663/107855028/107854916/107875768/107863035/107872994/107844092/107868082/107856759/107866321/107876758/107839766/107877925/107864536/107875610	LOC107838934/LOC107862250/LOC107862118/LOC107878895/LOC107844048/LOC107870073/LOC107867750/LOC107867325/LOC107845435/LOC107842746/LOC107845383/LOC107856090/LOC107840071/LOC107851663/LOC107855028/LOC107854916/LOC107875768/LOC107863035/LOC107872994/LOC107844092/LOC107868082/LOC107856759/LOC107866321/LOC107876758/LOC107839766/LOC107877925/LOC107864536/LOC107875610	sly:101248153/sly:101262299/sly:101267302/sly:101257684/sly:101257518/sly:101244176/sly:101252980/sly:101266935/sly:101244717/sly:101247061/sly:101255435/sly:101246744/sly:101259974/sly:101268533/sly:543647/sly:101266160/sly:101250511/sly:543967/sly:101261422/sly:101251220/sly:101244441/sly:101261158/sly:778212/sly:101265146/sly:101244420/sly:101258872/sly:101248918/sly:778324	28	6	107838934/107844092/107856759/107866321/107877925/107864536	22	107862250/107862118/107878895/107844048/107870073/107867750/107867325/107845435/107842746/107845383/107856090/107840071/107851663/107855028/107854916/107875768/107863035/107872994/107868082/107876758/107839766/107875610
sly00196	Photosynthesis - antenna proteins	14/1472	19/4048	0.00102088	0.0587005	107862252/107841969/107872234/107840025/107867983/107879833/107863778/107845349/107838850/107840893/107842738/107857025/107871477/107878133	LOC107862252/LOC107841969/LOC107872234/LOC107840025/LOC107867983/LOC107879833/LOC107863778/LOC107845349/LOC107838850/LOC107840893/LOC107842738/LOC107857025/LOC107871477/LOC107878133	sly:101268669/sly:543976/sly:101253380/sly:101256629/sly:101256006/sly:101257186/sly:101243766/sly:101253628/sly:101264376/sly:101252151/sly:101249002/sly:101267774/sly:544310/sly:543975	14	0		14	107862252/107841969/107872234/107840025/107867983/107879833/107863778/107845349/107838850/107840893/107842738/107857025/107871477/107878133
sly04712	Circadian rhythm - plant	24/1472	40/4048	0.00190094	0.0728695	107862999/107845418/107850365/107850219/107838759/107850670/107849675/107843364/107878104/novel.651/107838859/107867504/107860209/107849676/107842184/107862265/107879110/107855298/107871009/107870943/107838719/107871256/107864266/107850642	LOC107862999/LOC107845418/LOC107850365/LOC107850219/LOC107838759/LOC107850670/LOC107849675/LOC107843364/LOC107878104/-/LOC107838859/LOC107867504/LOC107860209/LOC107849676/LOC107842184/LOC107862265/LOC107879110/LOC107855298/LOC107871009/LOC107870943/LOC107838719/LOC107871256/LOC107864266/LOC107850642	sly:101250283/sly:101262866/sly:101258346/sly:101254785/sly:101256908/sly:101249698/sly:101259391/sly:101249224/sly:101259349/sly:101246108/sly:543733/sly:544219/sly:101256338/sly:101249977/sly:543547/sly:101259425/sly:101262847/sly:101263834/sly:101245619/sly:101245655/sly:100736520/sly:778295/sly:778294/sly:101268174	24	17	107862999/107845418/107850365/107850219/107838759/107850670/107843364/107878104/107838859/107860209/107849676/107842184/107862265/107855298/107871009/107871256/107864266	7	107849675/novel.651/107867504/107879110/107870943/107838719/107850642
sly04626	Plant-pathogen interaction	72/1472	152/4048	0.00296887	0.085355	107842605/107872867/107860522/107845825/107860115/107862088/107877796/107874660/107868186/107875924/107861622/107843851/107843743/107872239/107875343/107858934/107872603/107861198/107843864/107860951/107840074/107839265/107840869/107855966/107850465/107877218/107878300/107878147/107878873/107859878/107850672/107840017/107878173/107855368/107845709/107844061/107860484/107865937/107873410/107839975…	LOC107842605/LOC107872867/LOC107860522/LOC107845825/LOC107860115/LOC107862088/LOC107877796/LOC107874660/LOC107868186/LOC107875924/LOC107861622/LOC107843851/LOC107843743/LOC107872239/LOC107875343/LOC107858934/LOC107872603/LOC107861198/LOC107843864/LOC107860951/LOC107840074/LOC107839265/LOC107840869/LOC107855966/LOC107850465/LOC107877218/LOC107878300/LOC107878147/LOC107878873/LOC107859878/LOC107850…	sly:101268787/sly:101255501/sly:101251639/sly:101256817/sly:101256237/sly:543603/sly:101250219/sly:101265138/sly:100316879/sly:101256979/sly:543946/sly:101266882/sly:544131/sly:101055516/sly:101249560/sly:101260980/sly:544041/sly:544042/sly:101249692/sly:101252553/sly:101245298/sly:101261749/sly:101267093/sly:101250084/sly:101245185/sly:101256200/sly:101264342/sly:101252097/sly:778199/sly:1012603…	72	61	107842605/107872867/107860522/107845825/107860115/107862088/107877796/107874660/107868186/107875924/107861622/107843851/107843743/107872239/107875343/107858934/107872603/107861198/107843864/107860951/107840074/107839265/107840869/107855966/107878300/107878147/107878873/107859878/107850672/107840017/107878173/107855368/107845709/107844061/107860484/107865937/107873410/107839975/107878833/107863939…	11	107850465/107877218/107862040/107868062/107869296/107866845/novel.2194/novel.430/novel.342/107860627/107850948
sly00195	Photosynthesis	30/1472	56/4048	0.00603257	0.138749	107868483/107855007/107839911/107844032/107874570/107860359/107862342/107842516/107846834/107876125/107866833/107851947/107847776/107845286/107845875/107848242/107875667/107859535/107858989/107878867/107859585/107859036/107873079/107856476/107875374/107875316/107866881/107858690/107861831/107839909	LOC107868483/LOC107855007/LOC107839911/LOC107844032/LOC107874570/LOC107860359/LOC107862342/LOC107842516/LOC107846834/LOC107876125/LOC107866833/LOC107851947/LOC107847776/LOC107845286/LOC107845875/LOC107848242/LOC107875667/LOC107859535/LOC107858989/LOC107878867/LOC107859585/LOC107859036/LOC107873079/LOC107856476/LOC107875374/LOC107875316/LOC107866881/LOC107858690/LOC107861831/LOC107839909	sly:101254454/sly:101263132/sly:778301/sly:101259494/sly:101257676/sly:101258321/sly:101259227/sly:101245880/sly:101245163/sly:101248983/sly:544053/sly:101268297/sly:101259118/sly:101249865/sly:101256723/sly:101255222/sly:101254806/sly:543931/sly:101245421/sly:101263732/sly:101253342/sly:101268044/sly:543978/sly:544077/sly:101265249/sly:101266426/sly:101266666/sly:544299/sly:101264609/sly:1012483…	30	2	107847776/107859036	28	107868483/107855007/107839911/107844032/107874570/107860359/107862342/107842516/107846834/107876125/107866833/107851947/107845286/107845875/107848242/107875667/107859535/107858989/107878867/107859585/107873079/107856476/107875374/107875316/107866881/107858690/107861831/107839909
sly04075	Plant hormone signal transduction	92/1472	212/4048	0.0180506	0.345969	107848541/novel.1349/107861622/novel.2451/107861852/107867146/107840207/107880011/107855162/107868079/107848380/107865243/107874569/107867191/107857547/107840891/107843874/107855965/107861318/107843885/107839377/107862455/107843441/107839829/107877508/107867184/107861786/107864637/107867576/107873139/107851395/107864089/107855207/107877442/107851770/107840017/107851448/107863844/107861794/1078616…	LOC107848541/-/LOC107861622/-/LOC107861852/LOC107867146/LOC107840207/LOC107880011/LOC107855162/LOC107868079/LOC107848380/LOC107865243/LOC107874569/LOC107867191/LOC107857547/LOC107840891/LOC107843874/LOC107855965/LOC107861318/LOC107843885/LOC107839377/LOC107862455/LOC107843441/LOC107839829/LOC107877508/LOC107867184/LOC107861786/LOC107864637/LOC107867576/LOC107873139/LOC107851395/LOC107864089/LOC10…	sly:101247526/sly:101055592/sly:543946/sly:101260773/sly:101055548/sly:101262109/sly:101246970/sly:101245895/sly:543697/sly:101267832/sly:101244285/sly:100316895/sly:101055542/sly:101243703/sly:101260897/sly:100134911/sly:101248058/sly:101249794/sly:101256828/sly:101247174/sly:543680/sly:101260711/sly:101250944/sly:100736509/sly:101245668/sly:543723/sly:101055552/sly:101055541/sly:101265431/sly:1…	92	57	107848541/novel.1349/107861622/107861852/107840207/107855162/107868079/107865243/107874569/107840891/107855965/107839377/107862455/107843441/107839829/107877508/107861786/107864637/107867576/107851395/107864089/107855207/107877442/107840017/107851448/107863844/107861794/107861681/107839300/107864636/novel.5097/novel.5058/107866619/107877900/107878124/107845604/107867461/107858976/107871198/107857…	35	novel.2451/107867146/107880011/107848380/107867191/107857547/107843874/107861318/107843885/107867184/107873139/107851770/107846940/107869800/107870540/107861654/107872884/107867653/107878423/107867155/107859475/107877952/107877103/107839415/107869397/107839295/107863146/107872843/107845611/107850490/107840499/107854316/107840503/107844928/107875521
sly00500	Starch and sucrose metabolism	53/1472	118/4048	0.0324484	0.533081	107863145/107864541/107840421/107863475/107842585/107859190/107859646/107866823/107869091/107875711/107840883/107862814/107851575/107860137/107847877/107871051/107841023/107838905/107867882/107843683/107867836/107864313/107840474/107875763/107870058/107850962/107861717/107852961/107854535/107878514/107870503/107855205/107863437/107876837/107849925/107859350/107855300/107875222/107864787/107863438…	LOC107863145/LOC107864541/LOC107840421/LOC107863475/LOC107842585/LOC107859190/LOC107859646/LOC107866823/LOC107869091/LOC107875711/LOC107840883/LOC107862814/LOC107851575/LOC107860137/LOC107847877/LOC107871051/LOC107841023/LOC107838905/LOC107867882/LOC107843683/LOC107867836/LOC107864313/LOC107840474/LOC107875763/LOC107870058/LOC107850962/LOC107861717/LOC107852961/LOC107854535/LOC107878514/LOC107870…	sly:101250960/sly:100736451/sly:544283/sly:101259777/sly:101244113/sly:101245612/sly:101266782/sly:101250886/sly:101253815/sly:101266947/sly:543961/sly:101255377/sly:101247302/sly:101249596/sly:101256554/sly:543996/sly:544039/sly:101248330/sly:101252851/sly:544175/sly:101254670/sly:101055573/sly:101245995/sly:544022/sly:101247513/sly:101248935/sly:101264195/sly:101247621/sly:543710/sly:543968/sly…	53	26	107863145/107864541/107840421/107863475/107842585/107859190/107866823/107840883/107862814/107860137/107871051/107867882/107867836/107875763/107850962/107852961/107878514/107855205/107859350/107875222/107863438/107874940/107843265/107845360/107847550/107863104	27	107859646/107869091/107875711/107851575/107847877/107841023/107838905/107843683/107864313/107840474/107870058/107861717/107854535/107870503/107863437/107876837/107849925/107855300/107864787/107855766/107864053/107838770/107860527/107878685/107878413/107877184/107877529
sly00460	Cyanoamino acid metabolism	15/1472	30/4048	0.0873555	0.918621	107839921/107871033/107875711/107847877/107838905/107850203/107870058/107855205/107876837/107875222/107864787/107839203/107860201/107878685/107840942	LOC107839921/LOC107871033/LOC107875711/LOC107847877/LOC107838905/LOC107850203/LOC107870058/LOC107855205/LOC107876837/LOC107875222/LOC107864787/LOC107839203/LOC107860201/LOC107878685/LOC107840942	sly:101250548/sly:101250409/sly:101266947/sly:101256554/sly:101248330/sly:101267301/sly:101247513/sly:100191127/sly:101256510/sly:101248047/sly:543698/sly:101255033/sly:101258424/sly:101245862/sly:101263185	15	5	107839921/107850203/107855205/107875222/107840942	10	107871033/107875711/107847877/107838905/107870058/107876837/107864787/107839203/107860201/107878685
sly00591	Linoleic acid metabolism	8/1472	14/4048	0.0920519	0.918621	107861665/107847934/107858689/107841392/107874182/107877999/107874197/107843863	LOC107861665/LOC107847934/LOC107858689/LOC107841392/LOC107874182/LOC107877999/LOC107874197/LOC107843863	sly:544009/sly:543994/sly:543818/sly:101244618/sly:100301936/sly:101252788/sly:544008/sly:101263951	8	1	107861665	7	107847934/107858689/107841392/107874182/107877999/107874197/107843863
sly00750	Vitamin B6 metabolism	7/1472	4048-12-01	0.101478	0.918621	107861704/107875470/107858266/107876074/107862446/107863057/107875578	LOC107861704/LOC107875470/LOC107858266/LOC107876074/LOC107862446/LOC107863057/LOC107875578	sly:101260521/sly:101257782/sly:101254553/sly:101244777/sly:101258934/sly:101244752/sly:101254971	7	4	107875470/107858266/107862446/107875578	3	107861704/107876074/107863057
sly00561	Glycerolipid metabolism	31/1472	70/4048	0.103971	0.918621	107878499/107856389/107877723/107862846/107855115/107872465/107862289/107870261/107872293/107877860/107845447/107862040/107865980/107848429/107875629/107855051/107857605/107860088/107858867/107850590/107842762/107842839/107861698/107870415/107843863/107873296/107846976/107862757/107851383/107857043/107839197	LOC107878499/LOC107856389/LOC107877723/LOC107862846/LOC107855115/LOC107872465/LOC107862289/LOC107870261/LOC107872293/LOC107877860/LOC107845447/LOC107862040/LOC107865980/LOC107848429/LOC107875629/LOC107855051/LOC107857605/LOC107860088/LOC107858867/LOC107850590/LOC107842762/LOC107842839/LOC107861698/LOC107870415/LOC107843863/LOC107873296/LOC107846976/LOC107862757/LOC107851383/LOC107857043/LOC107839…	sly:101247838/sly:101267419/sly:101259856/sly:101249534/sly:101262422/sly:101257361/sly:101256961/sly:101266812/sly:101257357/sly:101258674/sly:101250748/sly:101259139/sly:101246167/sly:544171/sly:101261928/sly:101259602/sly:101253668/sly:101260497/sly:101245720/sly:101251763/sly:101251501/sly:101256514/sly:101259322/sly:101249542/sly:101263951/sly:101246145/sly:101254485/sly:778277/sly:101243786…	31	16	107878499/107877723/107862846/107855115/107872465/107862289/107870261/107872293/107877860/107845447/107855051/107857605/107858867/107842762/107842839/107851383	15	107856389/107862040/107865980/107848429/107875629/107860088/107850590/107861698/107870415/107843863/107873296/107846976/107862757/107857043/107839197
sly00730	Thiamine metabolism	10/1472	19/4048	0.109194	0.918621	107856341/107842524/107860754/107859361/107852315/107850729/107842923/107855698/107850768/107852342	LOC107856341/LOC107842524/LOC107860754/LOC107859361/LOC107852315/LOC107850729/LOC107842923/LOC107855698/LOC107850768/LOC107852342	sly:101257192/sly:101246176/sly:101246297/sly:101247277/sly:544220/sly:101254478/sly:101261649/sly:101250050/sly:101251053/sly:101260957	10	7	107856341/107842524/107860754/107850729/107842923/107855698/107852342	3	107859361/107852315/107850768
sly03040	Spliceosome	64/1472	155/4048	0.112735	0.918621	107848904/novel.444/107839625/107848909/107843339/107866982/107864033/107847634/107838706/107839361/107877847/107863693/107842728/107845610/107864215/107870215/107862291/107843739/107870421/107847671/107850526/107848164/novel.5179/107858861/107843221/107863009/107840983/107847347/107847326/107839862/107859405/107840032/107867788/107858560/107864040/107839180/107843023/107860456/107863914/10787554…	LOC107848904/-/LOC107839625/LOC107848909/LOC107843339/LOC107866982/LOC107864033/LOC107847634/LOC107838706/LOC107839361/LOC107877847/LOC107863693/LOC107842728/LOC107845610/LOC107864215/LOC107870215/LOC107862291/LOC107843739/LOC107870421/LOC107847671/LOC107850526/LOC107848164/-/LOC107858861/LOC107843221/LOC107863009/LOC107840983/LOC107847347/LOC107847326/LOC107839862/LOC107859405/LOC107840032/LOC10…	sly:101259321/sly:100134885/sly:101257012/sly:101253638/sly:101262878/sly:101254580/sly:101246377/sly:101246991/sly:101267636/sly:101245499/sly:101257670/sly:101261205/sly:101258585/sly:101265967/sly:101258490/sly:101055596/sly:101265017/sly:101254436/sly:101250296/sly:101245917/sly:101246008/sly:101266050/sly:101250425/sly:101267079/sly:101258986/sly:101247702/sly:101256945/sly:101255164/sly:101…	64	49	107848904/107839625/107848909/107843339/107866982/107864033/107847634/107838706/107839361/107842728/107845610/107864215/107870215/107862291/107843739/107870421/107850526/107848164/novel.5179/107843221/107863009/107840983/107847347/107847326/107859405/107840032/107867788/107864040/107839180/107843023/107860456/107863914/107875543/107853990/107839656/107851126/107871345/107864235/107856849/10785845…	15	novel.444/107877847/107863693/107847671/107858861/107839862/107858560/107859021/107870012/107876648/107844690/107855025/107840813/107845971/107859716
sly00030	Pentose phosphate pathway	21/1472	46/4048	0.123168	0.918621	107863060/107878559/107872898/107869222/107859905/107878843/107870082/107868504/107866750/107852345/107840104/107857557/107878064/107851138/107853880/107878178/107840477/107850669/107867663/107848158/107847434	LOC107863060/LOC107878559/LOC107872898/LOC107869222/LOC107859905/LOC107878843/LOC107870082/LOC107868504/LOC107866750/LOC107852345/LOC107840104/LOC107857557/LOC107878064/LOC107851138/LOC107853880/LOC107878178/LOC107840477/LOC107850669/LOC107867663/LOC107848158/LOC107847434	sly:101262229/sly:101251203/sly:101244195/sly:101262942/sly:101250853/sly:101243907/sly:101253771/sly:101253589/sly:101245455/sly:101266063/sly:101253137/sly:101245299/sly:101268121/sly:101268243/sly:543623/sly:101245182/sly:101246870/sly:101262700/sly:101266629/sly:101260137/sly:101264118	21	11	107863060/107872898/107859905/107870082/107868504/107866750/107852345/107851138/107853880/107878178/107850669	10	107878559/107869222/107878843/107840104/107857557/107878064/107840477/107867663/107848158/107847434
sly04070	Phosphatidylinositol signaling system	28/1472	64/4048	0.13453	0.918621	107860522/107867306/107843743/107855115/107871226/107875799/107840074/107862289/107867978/107850811/107839935/107864327/107861644/107864626/107848429/107851478/107857605/107842366/107876583/107870646/107850475/107870845/107850486/107870050/107851383/107844051/107858484/107845996	LOC107860522/LOC107867306/LOC107843743/LOC107855115/LOC107871226/LOC107875799/LOC107840074/LOC107862289/LOC107867978/LOC107850811/LOC107839935/LOC107864327/LOC107861644/LOC107864626/LOC107848429/LOC107851478/LOC107857605/LOC107842366/LOC107876583/LOC107870646/LOC107850475/LOC107870845/LOC107850486/LOC107870050/LOC107851383/LOC107844051/LOC107858484/LOC107845996	sly:101251639/sly:101246342/sly:544131/sly:101262422/sly:101255650/sly:101262819/sly:101245298/sly:101256961/sly:101251739/sly:101255550/sly:101254537/sly:100301919/sly:101246905/sly:101244032/sly:544171/sly:101267407/sly:101253668/sly:100301941/sly:101260244/sly:101260812/sly:101248349/sly:101263796/sly:101253265/sly:101253180/sly:101243786/sly:101243958/sly:101251565/sly:101247767	28	19	107860522/107867306/107843743/107855115/107875799/107840074/107862289/107850811/107839935/107864327/107861644/107864626/107857605/107850475/107850486/107851383/107844051/107858484/107845996	9	107871226/107867978/107848429/107851478/107842366/107876583/107870646/107870845/107870050
sly00360	Phenylalanine metabolism	22/1472	49/4048	0.136099	0.918621	107863937/107879725/107843343/107843092/107860278/107844958/107862076/107875407/107862932/107878340/107854291/107845345/107851006/107853336/107869755/107840262/107870882/107853897/107845437/107848444/107878648/107865520	LOC107863937/LOC107879725/LOC107843343/LOC107843092/LOC107860278/LOC107844958/LOC107862076/LOC107875407/LOC107862932/LOC107878340/LOC107854291/LOC107845345/LOC107851006/LOC107853336/LOC107869755/LOC107840262/LOC107870882/LOC107853897/LOC107845437/LOC107848444/LOC107878648/LOC107865520	sly:101249824/sly:778254/sly:104644402/sly:101243922/sly:101265690/sly:101255350/sly:101249624/sly:101244196/sly:101251363/sly:101250231/sly:101243656/sly:101264863/sly:100736464/sly:101252173/sly:101255909/sly:101260278/sly:101257377/sly:101260925/sly:101245039/sly:778256/sly:101257879/sly:101254423	22	16	107863937/107879725/107843092/107860278/107862076/107875407/107862932/107878340/107854291/107851006/107869755/107840262/107870882/107848444/107878648/107865520	6	107843343/107844958/107845345/107853336/107853897/107845437
sly00941	Flavonoid biosynthesis	14/1472	30/4048	0.16163	0.918621	107844729/107860278/107875407/107860031/107853336/107871144/107839366/107840262/107840069/107875625/107871256/107864266/107840863/107852750	LOC107844729/LOC107860278/LOC107875407/LOC107860031/LOC107853336/LOC107871144/LOC107839366/LOC107840262/LOC107840069/LOC107875625/LOC107871256/LOC107864266/LOC107840863/LOC107852750	sly:101261765/sly:101265690/sly:101244196/sly:544150/sly:101252173/sly:101266223/sly:101246092/sly:101260278/sly:101055588/sly:101244961/sly:778295/sly:778294/sly:544249/sly:101249265	14	12	107844729/107860278/107875407/107860031/107871144/107839366/107840262/107875625/107871256/107864266/107840863/107852750	2	107853336/107840069
sly00510	N-Glycan biosynthesis	18/1472	40/4048	0.164318	0.918621	107860690/107860595/107859093/107844499/107844374/107862527/107870013/107878105/107840392/107845131/107861255/107840984/107868288/107871483/107844599/107872871/107844012/107870753	LOC107860690/LOC107860595/LOC107859093/LOC107844499/LOC107844374/LOC107862527/LOC107870013/LOC107878105/LOC107840392/LOC107845131/LOC107861255/LOC107840984/LOC107868288/LOC107871483/LOC107844599/LOC107872871/LOC107844012/LOC107870753	sly:101260885/sly:101266287/sly:101246787/sly:543798/sly:101247658/sly:101250940/sly:101256171/sly:101259650/sly:101245405/sly:101261758/sly:101261568/sly:101256652/sly:101256748/sly:101250991/sly:101253423/sly:101255206/sly:101244134/sly:101268683	18	9	107860690/107859093/107862527/107878105/107845131/107844599/107872871/107844012/107870753	9	107860595/107844499/107844374/107870013/107840392/107861255/107840984/107868288/107871483
sly03008	Ribosome biogenesis in eukaryotes	29/1472	68/4048	0.168492	0.918621	107850743/107850889/107858476/107863533/107871401/107841110/107860209/107846487/107875330/107874054/107850954/107846366/107839449/107839710/107867252/107853493/107861877/107864654/107855501/107843147/107870943/107850717/107867739/107878901/107839647/107848351/107843833/107845971/107862536	LOC107850743/LOC107850889/LOC107858476/LOC107863533/LOC107871401/LOC107841110/LOC107860209/LOC107846487/LOC107875330/LOC107874054/LOC107850954/LOC107846366/LOC107839449/LOC107839710/LOC107867252/LOC107853493/LOC107861877/LOC107864654/LOC107855501/LOC107843147/LOC107870943/LOC107850717/LOC107867739/LOC107878901/LOC107839647/LOC107848351/LOC107843833/LOC107845971/LOC107862536	sly:101248085/sly:101253905/sly:101255078/sly:101267297/sly:101255995/sly:778289/sly:101256338/sly:101253657/sly:101245772/sly:101249952/sly:101252549/sly:101248232/sly:101266977/sly:101250547/sly:101256087/sly:101258364/sly:101252265/sly:101263757/sly:101268734/sly:101257021/sly:101245655/sly:101258943/sly:101258362/sly:101258878/sly:101254131/sly:101055607/sly:101256636/sly:101267649/sly:101253…	29	25	107850743/107850889/107858476/107863533/107871401/107841110/107860209/107846487/107875330/107874054/107850954/107846366/107839449/107839710/107867252/107853493/107861877/107864654/107855501/107843147/107850717/107878901/107839647/107848351/107862536	4	107870943/107867739/107843833/107845971
sly00562	Inositol phosphate metabolism	27/1472	63/4048	0.17128	0.918621	107867306/107871226/107875799/107867848/107850683/107867978/107875475/107850811/107839935/107864327/107861644/107851478/107861649/107879455/107842366/107870207/107876583/107870646/107850475/107870845/107850486/107870050/107871120/107858484/107876100/107845996/107852518	LOC107867306/LOC107871226/LOC107875799/LOC107867848/LOC107850683/LOC107867978/LOC107875475/LOC107850811/LOC107839935/LOC107864327/LOC107861644/LOC107851478/LOC107861649/LOC107879455/LOC107842366/LOC107870207/LOC107876583/LOC107870646/LOC107850475/LOC107870845/LOC107850486/LOC107870050/LOC107871120/LOC107858484/LOC107876100/LOC107845996/LOC107852518	sly:101246342/sly:101255650/sly:101262819/sly:101256545/sly:544226/sly:101251739/sly:101255702/sly:101255550/sly:101254537/sly:100301919/sly:101246905/sly:101267407/sly:101248857/sly:101268723/sly:100301941/sly:101260332/sly:101260244/sly:101260812/sly:101248349/sly:101263796/sly:101253265/sly:101253180/sly:101260052/sly:101251565/sly:101263222/sly:101247767/sly:101246286	27	17	107867306/107875799/107867848/107850683/107875475/107850811/107839935/107864327/107861644/107861649/107870207/107850475/107850486/107871120/107858484/107876100/107845996	10	107871226/107867978/107851478/107879455/107842366/107876583/107870646/107870845/107870050/107852518
sly00900	Terpenoid backbone biosynthesis	21/1472	48/4048	0.178445	0.918621	107870481/107862250/107857663/107857412/107854680/107878086/107859749/107872939/107850614/107852315/107850997/107871418/107854916/107851288/107867046/107878554/107851334/107852925/107858709/107850768/107852342	LOC107870481/LOC107862250/LOC107857663/LOC107857412/LOC107854680/LOC107878086/LOC107859749/LOC107872939/LOC107850614/LOC107852315/LOC107850997/LOC107871418/LOC107854916/LOC107851288/LOC107867046/LOC107878554/LOC107851334/LOC107852925/LOC107858709/LOC107850768/LOC107852342	sly:778310/sly:101262299/sly:101265292/sly:100134904/sly:100037490/sly:101262830/sly:543702/sly:101250227/sly:101250000/sly:544220/sly:100134900/sly:100134905/sly:101266160/sly:101260619/sly:778360/sly:101253007/sly:101252619/sly:101244138/sly:101256248/sly:101251053/sly:101260957	21	12	107857663/107857412/107878086/107859749/107872939/107850997/107871418/107851288/107867046/107878554/107858709/107852342	9	107870481/107862250/107854680/107850614/107852315/107854916/107851334/107852925/107850768
sly00908	Zeatin biosynthesis	13/1472	28/4048	0.179647	0.918621	107843843/107838882/107847679/107854914/107854634/107853867/107867342/107872877/107853864/107842013/107845158/107879647/107866953	LOC107843843/LOC107838882/LOC107847679/LOC107854914/LOC107854634/LOC107853867/LOC107867342/LOC107872877/LOC107853864/LOC107842013/LOC107845158/LOC107879647/LOC107866953	sly:101246295/sly:101258827/sly:101268254/sly:100874537/sly:101259234/sly:101262709/sly:101263012/sly:101265039/sly:101263304/sly:100874543/sly:101252238/sly:101244307/sly:101055612	13	4	107843843/107847679/107854914/107842013	9	107838882/107854634/107853867/107867342/107872877/107853864/107845158/107879647/107866953
sly00710	Carbon fixation in photosynthetic organisms	29/1472	69/4048	0.193997	0.918621	107866774/107878607/107862704/107862248/107859905/107867324/107878843/107842298/107845282/107852345/107861340/107840104/107870788/107878881/107857557/107870368/107840119/107851146/107839152/107870207/107861641/107858619/107840477/107869777/107850669/107867663/107848158/107852742/107852518	LOC107866774/LOC107878607/LOC107862704/LOC107862248/LOC107859905/LOC107867324/LOC107878843/LOC107842298/LOC107845282/LOC107852345/LOC107861340/LOC107840104/LOC107870788/LOC107878881/LOC107857557/LOC107870368/LOC107840119/LOC107851146/LOC107839152/LOC107870207/LOC107861641/LOC107858619/LOC107840477/LOC107869777/LOC107850669/LOC107867663/LOC107848158/LOC107852742/LOC107852518	sly:101264004/sly:101267723/sly:100736499/sly:101258932/sly:101250853/sly:543812/sly:101243907/sly:101258131/sly:101256813/sly:101266063/sly:101268337/sly:101253137/sly:101248407/sly:101253805/sly:101245299/sly:101266713/sly:778286/sly:101249445/sly:101246962/sly:101260332/sly:101246328/sly:101249428/sly:101246870/sly:101255322/sly:101262700/sly:101266629/sly:101260137/sly:101258368/sly:101246286	29	14	107878607/107862704/107862248/107859905/107867324/107842298/107845282/107852345/107839152/107870207/107861641/107858619/107850669/107852742	15	107866774/107878843/107861340/107840104/107870788/107878881/107857557/107870368/107840119/107851146/107840477/107869777/107867663/107848158/107852518
sly00052	Galactose metabolism	20/1472	46/4048	0.195393	0.918621	107859925/107860671/107840322/107859669/107860544/107843683/107870082/107850962/107861717/107839109/107855295/107862519/107863437/107878064/107851138/107870415/107840458/107865562/107843265/107862757	LOC107859925/LOC107860671/LOC107840322/LOC107859669/LOC107860544/LOC107843683/LOC107870082/LOC107850962/LOC107861717/LOC107839109/LOC107855295/LOC107862519/LOC107863437/LOC107878064/LOC107851138/LOC107870415/LOC107840458/LOC107865562/LOC107843265/LOC107862757	sly:100316891/sly:101257623/sly:101263843/sly:101266532/sly:101256341/sly:544175/sly:101253771/sly:101248935/sly:101264195/sly:544236/sly:101254509/sly:101249166/sly:543992/sly:101268121/sly:101268243/sly:101249542/sly:101261450/sly:101266745/sly:543713/sly:778277	20	10	107859925/107860671/107840322/107859669/107870082/107850962/107855295/107851138/107840458/107843265	10	107860544/107843683/107861717/107839109/107862519/107863437/107878064/107870415/107865562/107862757
sly00592	alpha-Linolenic acid metabolism	16/1472	36/4048	0.1997	0.918621	107861665/107867080/107839143/107848240/107850386/107845801/107854684/107874182/107877738/107840371/107869411/107877999/107874197/107843433/107843863/107863949	LOC107861665/LOC107867080/LOC107839143/LOC107848240/LOC107850386/LOC107845801/LOC107854684/LOC107874182/LOC107877738/LOC107840371/LOC107869411/LOC107877999/LOC107874197/LOC107843433/LOC107843863/LOC107863949	sly:544009/sly:606711/sly:101261255/sly:101266902/sly:101251665/sly:101247264/sly:544306/sly:100301936/sly:543763/sly:100736436/sly:101264819/sly:101252788/sly:544008/sly:101250354/sly:101263951/sly:543642	16	7	107861665/107867080/107839143/107850386/107854684/107877738/107869411	9	107848240/107845801/107874182/107840371/107877999/107874197/107843433/107843863/107863949
sly00590	Arachidonic acid metabolism	7/1472	14/4048	0.214002	0.946546	107866862/107864929/107871033/107875737/107877999/107843863/107840942	LOC107866862/LOC107864929/LOC107871033/LOC107875737/LOC107877999/LOC107843863/LOC107840942	sly:101268179/sly:544197/sly:101250409/sly:544261/sly:101252788/sly:101263951/sly:101263185	7	4	107866862/107864929/107875737/107840942	3	107871033/107877999/107843863
sly00053	Ascorbate and aldarate metabolism	16/1472	37/4048	0.239039	0.998006	107878151/107873361/107867450/107875751/107859858/107860470/107868078/107862290/107875512/107879723/107840121/107839422/107846976/107860116/107876100/107873435	LOC107878151/LOC107873361/LOC107867450/LOC107875751/LOC107859858/LOC107860470/LOC107868078/LOC107862290/LOC107875512/LOC107879723/LOC107840121/LOC107839422/LOC107846976/LOC107860116/LOC107876100/LOC107873435	sly:101246311/sly:778229/sly:101263901/sly:101055572/sly:101264282/sly:101263958/sly:778341/sly:101261402/sly:101253411/sly:101261840/sly:101254135/sly:100316902/sly:101254485/sly:101255942/sly:101263222/sly:778224	16	7	107875751/107860470/107862290/107875512/107860116/107876100/107873435	9	107878151/107873361/107867450/107859858/107868078/107879723/107840121/107839422/107846976
sly04120	Ubiquitin mediated proteolysis	41/1472	103/4048	0.262058	0.998006	107845380/107850670/107859035/107849675/107840439/107864781/107845146/novel.2593/107839205/107842722/107864869/107862509/107878611/107848069/novel.2132/107878858/107869038/107875201/107842670/107858665/107842184/107841216/107878578/107870216/107867044/107845424/107851560/107875215/107858524/107875793/107855303/107858424/107860188/107843071/107864235/107862956/107878629/107875818/107854682/1078506…	LOC107845380/LOC107850670/LOC107859035/LOC107849675/LOC107840439/LOC107864781/LOC107845146/-/LOC107839205/LOC107842722/LOC107864869/LOC107862509/LOC107878611/LOC107848069/-/LOC107878858/LOC107869038/LOC107875201/LOC107842670/LOC107858665/LOC107842184/LOC107841216/LOC107878578/LOC107870216/LOC107867044/LOC107845424/LOC107851560/LOC107875215/LOC107858524/LOC107875793/LOC107855303/LOC107858424/LOC10…	sly:101260872/sly:101249698/sly:101260503/sly:101259391/sly:101267748/sly:101253514/sly:101265083/sly:101264868/sly:101265863/sly:101265575/sly:101244602/sly:101250809/sly:101266538/sly:101261295/sly:101258213/sly:101264951/sly:101265515/sly:101263446/sly:101244411/sly:101260701/sly:543547/sly:101252115/sly:778329/sly:101262710/sly:543810/sly:101254242/sly:101257937/sly:101247534/sly:101267195/sl…	41	29	107845380/107850670/107859035/107840439/107864781/107845146/107839205/107842722/107862509/107878611/107878858/107875201/107842670/107858665/107842184/107878578/107870216/107867044/107845424/107875793/107855303/107858424/107860188/107843071/107864235/107878629/107875818/107850698/107866954	12	107849675/novel.2593/107864869/107848069/novel.2132/107869038/107841216/107851560/107875215/107858524/107862956/107854682
sly00945	Stilbenoid, diarylheptanoid and gingerol biosynthesis	9/1472	20/4048	0.279377	0.998006	107844729/107860278/107875407/107853336/107839366/107840262/107840069/107875625/107840863	LOC107844729/LOC107860278/LOC107875407/LOC107853336/LOC107839366/LOC107840262/LOC107840069/LOC107875625/LOC107840863	sly:101261765/sly:101265690/sly:101244196/sly:101252173/sly:101246092/sly:101260278/sly:101055588/sly:101244961/sly:544249	9	7	107844729/107860278/107875407/107839366/107840262/107875625/107840863	2	107853336/107840069
sly00940	Phenylpropanoid biosynthesis	43/1472	110/4048	0.305518	0.998006	107863937/107844729/107843092/107860278/107851630/107868752/107875711/107867212/107847877/107856092/107838905/107840027/107860047/107862076/107875407/107842218/107863896/107862932/107870058/107862991/107854291/107872642/107855938/107859012/107853336/107874093/107839366/107869755/107859584/107855205/107848279/107840262/107840069/107876837/107845437/107875222/107864787/107861980/107875625/107854094…	LOC107863937/LOC107844729/LOC107843092/LOC107860278/LOC107851630/LOC107868752/LOC107875711/LOC107867212/LOC107847877/LOC107856092/LOC107838905/LOC107840027/LOC107860047/LOC107862076/LOC107875407/LOC107842218/LOC107863896/LOC107862932/LOC107870058/LOC107862991/LOC107854291/LOC107872642/LOC107855938/LOC107859012/LOC107853336/LOC107874093/LOC107839366/LOC107869755/LOC107859584/LOC107855205/LOC107848…	sly:101249824/sly:101261765/sly:101243922/sly:101265690/sly:101260194/sly:101253377/sly:101266947/sly:101263035/sly:101256554/sly:101247048/sly:101248330/sly:544293/sly:101254970/sly:101249624/sly:101244196/sly:101251503/sly:101248236/sly:101251363/sly:101247513/sly:101251452/sly:101243656/sly:101249969/sly:101252368/sly:101265606/sly:101252173/sly:544084/sly:101246092/sly:101255909/sly:101253648…	43	28	107863937/107844729/107843092/107860278/107851630/107868752/107840027/107862076/107875407/107842218/107863896/107862932/107862991/107854291/107872642/107855938/107839366/107869755/107859584/107855205/107848279/107840262/107875222/107861980/107875625/107854094/107861887/107840863	15	107875711/107867212/107847877/107856092/107838905/107860047/107870058/107859012/107853336/107874093/107840069/107876837/107845437/107864787/107878685
sly00904	Diterpenoid biosynthesis	10/1472	23/4048	0.305858	0.998006	107861129/107845836/107859548/107861895/107878924/107840383/107863880/107868331/107872656/107852040	LOC107861129/LOC107845836/LOC107859548/LOC107861895/LOC107878924/LOC107840383/LOC107863880/LOC107868331/LOC107872656/LOC107852040	sly:101249786/sly:100134890/sly:101263073/sly:543504/sly:101252605/sly:100134888/sly:101246085/sly:101262489/sly:100134907/sly:100037505	10	8	107861129/107845836/107859548/107861895/107878924/107840383/107872656/107852040	2	107863880/107868331
sly00310	Lysine degradation	13/1472	31/4048	0.318323	0.998006	107878086/107877934/novel.511/107878272/107849051/107853311/107839916/107875209/107872914/107852488/107850520/107853169/107846976	LOC107878086/LOC107877934/-/LOC107878272/LOC107849051/LOC107853311/LOC107839916/LOC107875209/LOC107872914/LOC107852488/LOC107850520/LOC107853169/LOC107846976	sly:101262830/sly:101261722/sly:101245641/sly:101244888/sly:101265751/sly:101259749/sly:101244804/sly:101250245/sly:101247436/sly:101245641/sly:101268081/sly:101268173/sly:101254485	13	8	107878086/107878272/107853311/107875209/107872914/107852488/107850520/107853169	5	107877934/novel.511/107849051/107839916/107846976
sly00480	Glutathione metabolism	33/1472	84/4048	0.324316	0.998006	107842864/107856402/107854335/107873361/107864929/107866830/107871033/107839536/107867450/107861040/107858803/107855428/107875145/107849334/107847831/107842853/107868504/107842862/107875737/107866415/107861273/107859858/novel.834/107842135/107868078/107845660/107838848/107860662/107843765/107840942/107878538/107859660/107873435	LOC107842864/LOC107856402/LOC107854335/LOC107873361/LOC107864929/LOC107866830/LOC107871033/LOC107839536/LOC107867450/LOC107861040/LOC107858803/LOC107855428/LOC107875145/LOC107849334/LOC107847831/LOC107842853/LOC107868504/LOC107842862/LOC107875737/LOC107866415/LOC107861273/LOC107859858/-/LOC107842135/LOC107868078/LOC107845660/LOC107838848/LOC107860662/LOC107843765/LOC107840942/LOC107878538/LOC1078…	sly:101266750/sly:101244300/sly:101248761/sly:778229/sly:544197/sly:544209/sly:101250409/sly:543537/sly:101263901/sly:101267923/sly:101268216/sly:543816/sly:101268500/sly:101259958/sly:544177/sly:543814/sly:101253589/sly:101265571/sly:544261/sly:101261142/sly:101265881/sly:101264282/sly:101261142/sly:101264963/sly:778341/sly:101255036/sly:543813/sly:101255848/sly:101258000/sly:101263185/sly:10124…	33	20	107842864/107854335/107864929/107866830/107839536/107861040/107858803/107855428/107875145/107849334/107847831/107868504/107875737/107861273/107838848/107860662/107840942/107878538/107859660/107873435	13	107856402/107873361/107871033/107867450/107842853/107842862/107866415/107859858/novel.834/107842135/107868078/107845660/107843765
sly00130	Ubiquinone and other terpenoid-quinone biosynthesis	16/1472	39/4048	0.325531	0.998006	107875943/107862076/107875407/107878470/107859398/107845297/107862932/107878340/107863754/107845345/107848299/107869755/107870882/107845437/107862393/107852586	LOC107875943/LOC107862076/LOC107875407/LOC107878470/LOC107859398/LOC107845297/LOC107862932/LOC107878340/LOC107863754/LOC107845345/LOC107848299/LOC107869755/LOC107870882/LOC107845437/LOC107862393/LOC107852586	sly:778225/sly:101249624/sly:101244196/sly:101257784/sly:101245223/sly:101247015/sly:101251363/sly:101250231/sly:101263675/sly:101264863/sly:101262657/sly:101255909/sly:101257377/sly:101245039/sly:101246522/sly:101255068	16	8	107862076/107875407/107878470/107862932/107878340/107848299/107869755/107870882	8	107875943/107859398/107845297/107863754/107845345/107845437/107862393/107852586
sly00770	Pantothenate and CoA biosynthesis	9/1472	21/4048	0.341253	0.998006	107847900/107847764/107860909/107878547/107852132/107850416/107862856/107852152/107851610	LOC107847900/LOC107847764/LOC107860909/LOC107878547/LOC107852132/LOC107850416/LOC107862856/LOC107852152/LOC107851610	sly:778322/sly:101263146/sly:101261134/sly:101253806/sly:101267963/sly:101252944/sly:543719/sly:101267567/sly:101246107	9	6	107847900/107847764/107860909/107878547/107862856/107852152	3	107852132/107850416/107851610
sly04016	MAPK signaling pathway - plant	51/1472	133/4048	0.345321	0.998006	107842605/107872867/107860522/107864513/107873437/107862088/107861622/107869622/107872955/107843743/107859787/107865243/107840204/107858934/107855965/107839377/107840074/107839265/107843441/107878300/107851395/107855207/107875867/107858897/107840017/107854865/107866619/107839975/107867461/107872884/novel.4963/107863244/107869341/107871198/107864242/107877952/107872267/107850689/107839295/10786314…	LOC107842605/LOC107872867/LOC107860522/LOC107864513/LOC107873437/LOC107862088/LOC107861622/LOC107869622/LOC107872955/LOC107843743/LOC107859787/LOC107865243/LOC107840204/LOC107858934/LOC107855965/LOC107839377/LOC107840074/LOC107839265/LOC107843441/LOC107878300/LOC107851395/LOC107855207/LOC107875867/LOC107858897/LOC107840017/LOC107854865/LOC107866619/LOC107839975/LOC107867461/LOC107872884/-/LOC1078…	sly:101268787/sly:101255501/sly:101251639/sly:101246650/sly:543880/sly:543603/sly:543946/sly:104647127/sly:101249467/sly:544131/sly:543585/sly:100316895/sly:101262346/sly:101260980/sly:101249794/sly:543680/sly:101245298/sly:101261749/sly:101250944/sly:101264342/sly:101258886/sly:101248690/sly:101262221/sly:101263483/sly:100736531/sly:101255059/sly:543712/sly:101263165/sly:101262107/sly:101267127/…	51	42	107842605/107872867/107860522/107864513/107873437/107862088/107861622/107869622/107872955/107843743/107865243/107840204/107858934/107855965/107839377/107840074/107839265/107843441/107878300/107851395/107855207/107858897/107840017/107854865/107866619/107839975/107867461/novel.4963/107863244/107869341/107871198/107864242/107872267/107850689/107855732/107850532/107850747/107866963/107871359/10787831…	9	107859787/107875867/107872884/107877952/107839295/107863146/107864851/107838925/107875521
sly03050	Proteasome	16/1472	40/4048	0.371423	0.998006	107871486/107877889/107850730/107864141/107854199/107878375/107855500/107844049/107864037/107840898/107853912/107840561/107867138/107848074/107839083/107873557	LOC107871486/LOC107877889/LOC107850730/LOC107864141/LOC107854199/LOC107878375/LOC107855500/LOC107844049/LOC107864037/LOC107840898/LOC107853912/LOC107840561/LOC107867138/LOC107848074/LOC107839083/LOC107873557	sly:101250118/sly:101258384/sly:101263403/sly:101249580/sly:101244518/sly:101252199/sly:101258917/sly:101256141/sly:101249287/sly:101250370/sly:101249344/sly:544128/sly:101259629/sly:101251952/sly:101267619/sly:101268289	16	15	107871486/107877889/107850730/107864141/107854199/107878375/107855500/107844049/107864037/107840898/107840561/107867138/107848074/107839083/107873557	1	107853912
sly00760	Nicotinate and nicotinamide metabolism	8/1472	19/4048	0.381523	0.998006	107874740/107863875/107862603/107870650/107860287/107840108/107867787/107861725	LOC107874740/LOC107863875/LOC107862603/LOC107870650/LOC107860287/LOC107840108/LOC107867787/LOC107861725	sly:101263635/sly:101245868/sly:101246910/sly:101255294/sly:101264576/sly:101251614/sly:101266835/sly:101263094	8	6	107874740/107863875/107862603/107860287/107840108/107861725	2	107870650/107867787
sly00970	Aminoacyl-tRNA biosynthesis	18/1472	46/4048	0.40098	0.998006	novel.2727/107871447/107860455/107877813/107860102/107873105/107844145/107870342/107880061/107878157/107862107/107842328/107847885/107840260/107871475/107839766/107850645/107845564	-/LOC107871447/LOC107860455/LOC107877813/LOC107860102/LOC107873105/LOC107844145/LOC107870342/LOC107880061/LOC107878157/LOC107862107/LOC107842328/LOC107847885/LOC107840260/LOC107871475/LOC107839766/LOC107850645/LOC107845564	sly:101247918/sly:101247618/sly:101256769/sly:101255211/sly:101261082/sly:101268820/sly:101250918/sly:101257430/sly:101243628/sly:101249471/sly:101268375/sly:101249760/sly:101251979/sly:101251229/sly:101244106/sly:101244420/sly:101244069/sly:101249307	18	5	novel.2727/107870342/107862107/107847885/107871475	13	107871447/107860455/107877813/107860102/107873105/107844145/107880061/107878157/107842328/107840260/107839766/107850645/107845564
sly00650	Butanoate metabolism	9/1472	22/4048	0.404893	0.998006	107857412/107878086/107850578/107861722/107878547/107850416/107851288/107878648/107841810	LOC107857412/LOC107878086/LOC107850578/LOC107861722/LOC107878547/LOC107850416/LOC107851288/LOC107878648/LOC107841810	sly:100134904/sly:101262830/sly:100147722/sly:100147725/sly:101253806/sly:101252944/sly:101260619/sly:101257879/sly:100147724	9	7	107857412/107878086/107850578/107878547/107851288/107878648/107841810	2	107861722/107850416
sly00230	Purine metabolism	32/1472	84/4048	0.409772	0.998006	107867410/107870413/107861661/107860754/107857603/107865390/107875867/107872898/107851994/107869222/107877384/107843922/107869328/107840161/107856002/107847788/107851217/107857653/107864673/107850729/107851394/107846688/107843616/107842729/107842923/107868552/107868058/107870346/107861725/107848351/107858882/107864665	LOC107867410/LOC107870413/LOC107861661/LOC107860754/LOC107857603/LOC107865390/LOC107875867/LOC107872898/LOC107851994/LOC107869222/LOC107877384/LOC107843922/LOC107869328/LOC107840161/LOC107856002/LOC107847788/LOC107851217/LOC107857653/LOC107864673/LOC107850729/LOC107851394/LOC107846688/LOC107843616/LOC107842729/LOC107842923/LOC107868552/LOC107868058/LOC107870346/LOC107861725/LOC107848351/LOC107858…	sly:101248507/sly:101250010/sly:101251456/sly:101246297/sly:101253148/sly:101256508/sly:101262221/sly:101244195/sly:100037732/sly:101262942/sly:101265671/sly:101261672/sly:101263236/sly:101259587/sly:101246464/sly:101254382/sly:101250287/sly:101246321/sly:101259979/sly:101254478/sly:101248066/sly:101262543/sly:101265599/sly:101251711/sly:101261649/sly:101248901/sly:101264119/sly:100316897/sly:101…	32	18	107870413/107861661/107860754/107872898/107851994/107877384/107843922/107869328/107840161/107856002/107847788/107864673/107850729/107843616/107842729/107842923/107861725/107848351	14	107867410/107857603/107865390/107875867/107869222/107851217/107857653/107851394/107846688/107868552/107868058/107870346/107858882/107864665
sly00010	Glycolysis / Gluconeogenesis	40/1472	106/4048	0.419306	0.998006	107870413/107862704/107860544/107840829/107877384/107867550/107859905/107867324/107878843/107870082/107869328/107866750/107845282/107859988/107840161/107847937/107852345/107840104/107878881/107842526/107848810/107845990/107862519/107843197/107870207/107878064/107842839/107851138/107843616/107878178/107840477/107850669/107862877/107867663/107874609/107846976/107871120/107852742/107864665/107852518	LOC107870413/LOC107862704/LOC107860544/LOC107840829/LOC107877384/LOC107867550/LOC107859905/LOC107867324/LOC107878843/LOC107870082/LOC107869328/LOC107866750/LOC107845282/LOC107859988/LOC107840161/LOC107847937/LOC107852345/LOC107840104/LOC107878881/LOC107842526/LOC107848810/LOC107845990/LOC107862519/LOC107843197/LOC107870207/LOC107878064/LOC107842839/LOC107851138/LOC107843616/LOC107878178/LOC107840…	sly:101250010/sly:100736499/sly:101256341/sly:101252984/sly:101265671/sly:101247124/sly:101250853/sly:543812/sly:101243907/sly:101253771/sly:101263236/sly:101245455/sly:101256813/sly:101263563/sly:101259587/sly:101254693/sly:101266063/sly:101253137/sly:101253805/sly:101251366/sly:101245444/sly:101247173/sly:101249166/sly:544068/sly:101260332/sly:101268121/sly:101256514/sly:101268243/sly:101265599…	40	26	107870413/107862704/107877384/107867550/107859905/107867324/107870082/107869328/107866750/107845282/107840161/107847937/107852345/107848810/107845990/107843197/107870207/107842839/107851138/107843616/107878178/107850669/107862877/107874609/107871120/107852742	14	107860544/107840829/107878843/107859988/107840104/107878881/107842526/107862519/107878064/107840477/107867663/107846976/107864665/107852518
sly01200	Carbon metabolism	89/1472	240/4048	0.430488	0.998006	novel.5398/107870413/107859787/107839921/107859795/107878086/107866774/107847275/107870847/107878607/107863060/107861722/107862704/107840829/107862248/107872898/107845759/107869222/107877384/novel.5863/107867550/107850203/107859905/107867324/107878843/107862684/107842298/107870082/107869328/107868504/107845282/107840161/107847937/107858266/107852345/107861340/107871444/novel.4076/107840104/107870…	-/LOC107870413/LOC107859787/LOC107839921/LOC107859795/LOC107878086/LOC107866774/LOC107847275/LOC107870847/LOC107878607/LOC107863060/LOC107861722/LOC107862704/LOC107840829/LOC107862248/LOC107872898/LOC107845759/LOC107869222/LOC107877384/-/LOC107867550/LOC1	sly:543522/sly:101250010/sly:543585/sly:101250548/sly:101253647/sly:101262830/sly:101264004/sly:544250/sly:101253277/sly:101267723/sly:101262229/sly:100147725/sly:100736499/sly:101252984/sly:101258932/sly:101244195/sly:101245503/sly:101262942/sly:101265671/sly:101257857/sly:101247124/sly:101267301/sly:101250853/sly:543812/sly:101243907/sly:101267395/sly:101258131/sly:101253771/sly:101263236/sly:1…	89	49	107870413/107839921/107859795/107878086/107870847/107878607/107863060/107862704/107862248/107872898/107877384/107867550/107850203/107859905/107867324/107842298/107870082/107869328/107868504/107845282/107840161/107847937/107858266/107852345/107864063/107861619/107860713/107848810/107853311/107878229/107843197/107839152/107838817/107870207/107861641/107851138/107855661/107850532/107843616/107878792…	40	novel.5398/107859787/107866774/107847275/107861722/107840829/107845759/107869222/novel.5863/107878843/107862684/107861340/107871444/novel.4076/107840104/107870788/107878881/107845595/107857557/107842526/107871423/107870368/107879455/107840119/107851146/107878064/107844443/107839203/107866355/107854965/107860201/107840477/107869777/novel.946/107867663/107848158/107859603/107847434/107864665/107852…
sly00062	Fatty acid elongation	14/1472	36/4048	0.437451	0.998006	107872813/107839065/107858717/107848397/107864657/107870144/107856569/107860042/107873145/107847631/107848634/107846933/107839042/107858588	LOC107872813/LOC107839065/LOC107858717/LOC107848397/LOC107864657/LOC107870144/LOC107856569/LOC107860042/LOC107873145/LOC107847631/LOC107848634/LOC107846933/LOC107839042/LOC107858588	sly:101246151/sly:101244691/sly:101248828/sly:101262214/sly:101262858/sly:101245050/sly:101262991/sly:101245220/sly:101250807/sly:101252875/sly:101255691/sly:101260402/sly:101266659/sly:101257332	14	9	107872813/107839065/107858717/107864657/107870144/107860042/107873145/107847631/107839042	5	107848397/107856569/107848634/107846933/107858588
sly00531	Glycosaminoglycan degradation	5/1472	4048-12-01	0.456498	0.998006	107847901/107843457/107862297/107855392/107843440	LOC107847901/LOC107843457/LOC107862297/LOC107855392/LOC107843440	sly:101254841/sly:100529103/sly:101258638/sly:101257181/sly:101256537	5	1	107847901	4	107843457/107862297/107855392/107843440
sly03020	RNA polymerase	12/1472	31/4048	0.459444	0.998006	107873487/107838856/107843815/107842958/107869967/107839851/107875698/107854235/107845642/107873112/107858033/novel.6909	LOC107873487/LOC107838856/LOC107843815/LOC107842958/LOC107869967/LOC107839851/LOC107875698/LOC107854235/LOC107845642/LOC107873112/LOC107858033/-	sly:101259753/sly:101261746/sly:101260591/sly:101259186/sly:101255881/sly:101246067/sly:101264016/sly:101258274/sly:101248458/sly:101267531/sly:544278/sly:101256121	12	10	107873487/107838856/107843815/107842958/107839851/107875698/107845642/107873112/107858033/novel.6909	2	107869967/107854235
sly00670	One carbon pool by folate	7/1472	18/4048	0.499804	0.998006	107839921/107850203/107860102/107871423/107874896/107870346/107859603	LOC107839921/LOC107850203/LOC107860102/LOC107871423/LOC107874896/LOC107870346/LOC107859603	sly:101250548/sly:101267301/sly:101261082/sly:101261413/sly:101251299/sly:100316897/sly:101249137	7	2	107839921/107850203	5	107860102/107871423/107874896/107870346/107859603
sly03015	mRNA surveillance pathway	40/1472	109/4048	0.507495	0.998006	107862553/107850911/107843339/107861910/107851101/107848129/107847405/novel.4691/107873196/107839859/107870910/107853425/107871351/107847557/107859884/107864245/107875901/107840594/107878033/107870705/107847874/107870112/107876108/107839160/107859345/107839054/107862120/107868902/107850914/107863303/107842586/107863384/107878162/107863382/107867936/novel.1611/107856873/107845503/107842644/1078636…	LOC107862553/LOC107850911/LOC107843339/LOC107861910/LOC107851101/LOC107848129/LOC107847405/-/LOC107873196/LOC107839859/LOC107870910/LOC107853425/LOC107871351/LOC107847557/LOC107859884/LOC107864245/LOC107875901/LOC107840594/LOC107878033/LOC107870705/LOC107847874/LOC107870112/LOC107876108/LOC107839160/LOC107859345/LOC107839054/LOC107862120/LOC107868902/LOC107850914/LOC107863303/LOC107842586/LOC1078…	sly:101252047/sly:101251957/sly:101262878/sly:101244963/sly:101256441/sly:101245749/sly:101253276/sly:101252047/sly:101249463/sly:101264766/sly:101244838/sly:101251329/sly:101251680/sly:101266027/sly:101258611/sly:101260765/sly:101256096/sly:101256045/sly:101257003/sly:101260240/sly:101257170/sly:101260528/sly:101247241/sly:101243899/sly:101265747/sly:101263044/sly:101267011/sly:101257199/sly:101…	40	27	107862553/107850911/107843339/107861910/107851101/107847405/107873196/107839859/107853425/107871351/107847557/107859884/107864245/107840594/107878033/107847874/107876108/107859345/107839054/107862120/107868902/107863303/107842586/107863382/107867936/novel.1611/107856873	13	107848129/novel.4691/107870910/107875901/107870705/107870112/107839160/107850914/107863384/107878162/107845503/107842644/107863623
sly00051	Fructose and mannose metabolism	20/1472	54/4048	0.510401	0.998006	107856611/107859905/107878843/107875763/107870082/107866750/107852345/107840104/107839408/107878370/107870207/107845858/107878064/107851138/107878178/107840477/107850669/107867663/107859926/107852518	LOC107856611/LOC107859905/LOC107878843/LOC107875763/LOC107870082/LOC107866750/LOC107852345/LOC107840104/LOC107839408/LOC107878370/LOC107870207/LOC107845858/LOC107878064/LOC107851138/LOC107878178/LOC107840477/LOC107850669/LOC107867663/LOC107859926/LOC107852518	sly:101258640/sly:101250853/sly:101243907/sly:544022/sly:101253771/sly:101245455/sly:101266063/sly:101253137/sly:778245/sly:101245376/sly:101260332/sly:101261972/sly:101268121/sly:101268243/sly:101245182/sly:101246870/sly:101262700/sly:101266629/sly:101265391/sly:101246286	20	12	107859905/107875763/107870082/107866750/107852345/107839408/107870207/107845858/107851138/107878178/107850669/107859926	8	107856611/107878843/107840104/107878370/107878064/107840477/107867663/107852518
sly00740	Riboflavin metabolism	5/1472	13/4048	0.541276	0.998006	107840068/107862848/107848460/107863918/107871411	LOC107840068/LOC107862848/LOC107848460/LOC107863918/LOC107871411	sly:544238/sly:101249252/sly:101263281/sly:101248871/sly:101259936	5	3	107840068/107862848/107863918	2	107848460/107871411
sly00630	Glyoxylate and dicarboxylate metabolism	25/1472	69/4048	0.554899	0.998006	107858887/107859787/107839921/107878086/107847275/107861722/107862248/107870519/107850203/107862684/107861340/107845595/107848810/107840119/107878229/107838817/107855661/107866355/107874896/107850532/107858619/107854965/107860201/107841810/107859603	LOC107858887/LOC107859787/LOC107839921/LOC107878086/LOC107847275/LOC107861722/LOC107862248/LOC107870519/LOC107850203/LOC107862684/LOC107861340/LOC107845595/LOC107848810/LOC107840119/LOC107878229/LOC107838817/LOC107855661/LOC107866355/LOC107874896/LOC107850532/LOC107858619/LOC107854965/LOC107860201/LOC107841810/LOC107859603	sly:101251259/sly:543585/sly:101250548/sly:101262830/sly:544250/sly:100147725/sly:101258932/sly:544275/sly:101267301/sly:101267395/sly:101268337/sly:100134875/sly:101245444/sly:778286/sly:101248455/sly:101246162/sly:101260902/sly:101251910/sly:101251299/sly:101259333/sly:101249428/sly:101257194/sly:101258424/sly:100147724/sly:101249137	25	13	107858887/107839921/107878086/107862248/107870519/107850203/107848810/107878229/107838817/107855661/107850532/107858619/107841810	12	107859787/107847275/107861722/107862684/107861340/107845595/107840119/107866355/107874896/107854965/107860201/107859603
sly00906	Carotenoid biosynthesis	11/1472	30/4048	0.555051	0.998006	107850059/107852027/107851558/107868281/107872934/107846808/107840923/107870293/107839011/107850430/107850257	LOC107850059/LOC107852027/LOC107851558/LOC107868281/LOC107872934/LOC107846808/LOC107840923/LOC107870293/LOC107839011/LOC107850430/LOC107850257	sly:101249565/sly:544163/sly:101267857/sly:543988/sly:100322877/sly:100316877/sly:544129/sly:101254720/sly:101254620/sly:543696/sly:101253762	11	6	107850059/107852027/107868281/107846808/107870293/107839011	5	107851558/107872934/107840923/107850430/107850257
sly00330	Arginine and proline metabolism	17/1472	47/4048	0.566172	0.998006	107859655/107843343/107866830/107851501/107840486/107868214/107847831/107870798/107855493/107860213/107847415/107858927/107850940/107840963/107858653/107846976/107841896	LOC107859655/LOC107843343/LOC107866830/LOC107851501/LOC107840486/LOC107868214/LOC107847831/LOC107870798/LOC107855493/LOC107860213/LOC107847415/LOC107858927/LOC107850940/LOC107840963/LOC107858653/LOC107846976/LOC107841896	sly:101264170/sly:104644402/sly:544209/sly:101245118/sly:543960/sly:101267095/sly:544177/sly:101249640/sly:101268445/sly:101254254/sly:100134880/sly:101261090/sly:101267493/sly:101266198/sly:101253022/sly:101254485/sly:101260014	17	12	107859655/107866830/107840486/107847831/107855493/107860213/107847415/107858927/107850940/107840963/107858653/107841896	5	107843343/107851501/107868214/107870798/107846976
sly03022	Basal transcription factors	13/1472	36/4048	0.575359	0.998006	107876068/107838874/107877504/107850411/107843121/107867222/107875522/107872836/107861091/107863662/107839383/107839582/107861693	LOC107876068/LOC107838874/LOC107877504/LOC107850411/LOC107843121/LOC107867222/LOC107875522/LOC107872836/LOC107861091/LOC107863662/LOC107839383/LOC107839582/LOC107861693	sly:101245068/sly:101264035/sly:101245072/sly:101254156/sly:101264247/sly:101262209/sly:101244295/sly:101268876/sly:104645911/sly:101251406/sly:101268093/sly:101248768/sly:101258141	13	9	107877504/107850411/107843121/107867222/107875522/107872836/107839383/107839582/107861693	4	107876068/107838874/107861091/107863662
sly04144	Endocytosis	52/1472	146/4048	0.607106	0.998006	107861758/107847805/107840559/107840494/107860039/107866274/107877979/107859864/107859562/107839855/107843415/107870749/107867978/107875647/107851527/107852341/107878757/107858497/107870215/107850466/107870162/107839935/107838904/107867723/107858584/107853717/107868199/107876154/107870570/107875612/107866184/107859654/107840467/107847347/107871008/107839862/107871007/107876031/107878256/107875543…	LOC107861758/LOC107847805/LOC107840559/LOC107840494/LOC107860039/LOC107866274/LOC107877979/LOC107859864/LOC107859562/LOC107839855/LOC107843415/LOC107870749/LOC107867978/LOC107875647/LOC107851527/LOC107852341/LOC107878757/LOC107858497/LOC107870215/LOC107850466/LOC107870162/LOC107839935/LOC107838904/LOC107867723/LOC107858584/LOC107853717/LOC107868199/LOC107876154/LOC107870570/LOC107875612/LOC107866…	sly:101247200/sly:101258366/sly:101263355/sly:101265874/sly:101246301/sly:544181/sly:101265657/sly:101263663/sly:101258121/sly:101263852/sly:101267950/sly:101266058/sly:101251739/sly:101256349/sly:101259697/sly:544251/sly:101258096/sly:101267752/sly:101055596/sly:101253169/sly:101247904/sly:101254537/sly:101264460/sly:101264116/sly:101247094/sly:101248300/sly:101243768/sly:101246065/sly:101254375…	52	41	107861758/107847805/107840559/107840494/107860039/107866274/107877979/107859864/107859562/107839855/107843415/107875647/107851527/107878757/107858497/107870215/107850466/107870162/107839935/107838904/107867723/107858584/107868199/107876154/107870570/107875612/107859654/107840467/107847347/107871008/107871007/107876031/107875543/107843335/107868328/107861872/107843340/107872889/107847558/107853612…	11	107870749/107867978/107852341/107853717/107866184/107839862/107878256/107838962/107875128/107870050/107854017
sly00410	beta-Alanine metabolism	13/1472	37/4048	0.622894	0.998006	107859655/107850578/107847831/107870798/107857656/107879455/107840963/107858653/107862856/107852152/107846976/107841896/107865520	LOC107859655/LOC107850578/LOC107847831/LOC107870798/LOC107857656/LOC107879455/LOC107840963/LOC107858653/LOC107862856/LOC107852152/LOC107846976/LOC107841896/LOC107865520	sly:101264170/sly:100147722/sly:544177/sly:101249640/sly:101255253/sly:101268723/sly:101266198/sly:101253022/sly:543719/sly:101267567/sly:101254485/sly:101260014/sly:101254423	13	10	107859655/107850578/107847831/107857656/107840963/107858653/107862856/107852152/107841896/107865520	3	107870798/107879455/107846976
sly00564	Glycerophospholipid metabolism	31/1472	88/4048	0.628194	0.998006	107878499/107866274/107856389/107855115/107858830/107860821/107854912/107872465/107862289/107872293/107858892/107873315/107852341/107842339/107864626/107876040/107865980/107848429/107870033/107857605/107860088/107877999/107876031/107842762/novel.2320/107850570/107854150/107843863/107878481/107851383/107839197	LOC107878499/LOC107866274/LOC107856389/LOC107855115/LOC107858830/LOC107860821/LOC107854912/LOC107872465/LOC107862289/LOC107872293/LOC107858892/LOC107873315/LOC107852341/LOC107842339/LOC107864626/LOC107876040/LOC107865980/LOC107848429/LOC107870033/LOC107857605/LOC107860088/LOC107877999/LOC107876031/LOC107842762/-/LOC107850570/LOC107854150/LOC107843863/LOC107878481/LOC107851383/LOC107839197	sly:101247838/sly:544181/sly:101267419/sly:101262422/sly:101253049/sly:101261081/sly:101264154/sly:101257361/sly:101256961/sly:101257357/sly:101264888/sly:101253092/sly:544251/sly:101261489/sly:101244032/sly:101266950/sly:101246167/sly:544171/sly:101260923/sly:101253668/sly:101260497/sly:101252788/sly:543819/sly:101251501/sly:543681/sly:101255984/sly:543681/sly:101263951/sly:101255115/sly:1012437…	31	16	107878499/107866274/107855115/107860821/107854912/107872465/107862289/107872293/107858892/107864626/107876040/107857605/107876031/107842762/107850570/107851383	15	107856389/107858830/107873315/107852341/107842339/107865980/107848429/107870033/107860088/107877999/novel.2320/107854150/107843863/107878481/107839197
sly00620	Pyruvate metabolism	29/1472	83/4048	0.64758	0.998006	107870413/107878086/novel.1199/107878607/107839025/107862248/107877384/107867324/107862684/107842298/107869328/107859593/107850244/107840161/107847937/107871444/107870788/107864063/107848810/107852146/107840119/107873262/107839152/107843616/107856235/107858619/107862877/107846976/107864665	LOC107870413/LOC107878086/-/LOC107878607/LOC107839025/LOC107862248/LOC107877384/LOC107867324/LOC107862684/LOC107842298/LOC107869328/LOC107859593/LOC107850244/LOC107840161/LOC107847937/LOC107871444/LOC107870788/LOC107864063/LOC107848810/LOC107852146/LOC107840119/LOC107873262/LOC107839152/LOC107843616/LOC107856235/LOC107858619/LOC107862877/LOC107846976/LOC107864665	sly:101250010/sly:101262830/sly:101262949/sly:101267723/sly:101259466/sly:101258932/sly:101265671/sly:543812/sly:101267395/sly:101258131/sly:101263236/sly:101251054/sly:101250973/sly:101259587/sly:101254693/sly:543869/sly:101248407/sly:101265278/sly:101245444/sly:101266523/sly:778286/sly:101247226/sly:101246962/sly:101265599/sly:101260691/sly:101249428/sly:101248181/sly:101254485/sly:101261160	29	21	107870413/107878086/107878607/107862248/107877384/107867324/107842298/107869328/107859593/107850244/107840161/107847937/107864063/107848810/107852146/107873262/107839152/107843616/107856235/107858619/107862877	8	novel.1199/107839025/107862684/107871444/107870788/107840119/107846976/107864665
sly00380	Tryptophan metabolism	10/1472	29/4048	0.651396	0.998006	107843343/107859787/107878086/107861847/107853311/107839093/107873630/107842047/107850532/107846976	LOC107843343/LOC107859787/LOC107878086/LOC107861847/LOC107853311/LOC107839093/LOC107873630/LOC107842047/LOC107850532/LOC107846976	sly:104644402/sly:543585/sly:101262830/sly:101244469/sly:101259749/sly:101256506/sly:101260940/sly:101267265/sly:101259333/sly:101254485	10	7	107878086/107861847/107853311/107839093/107873630/107842047/107850532	3	107843343/107859787/107846976
sly03018	RNA degradation	31/1472	90/4048	0.686471	0.998006	107875683/107848258/107850743/107838901/107861912/107860664/107847543/107859743/107870082/107874909/107840138/107853072/107843221/107871481/107864528/107843197/107863914/107853990/107851126/107878064/107851138/107839270/107876060/107845347/107870656/107878815/novel.3903/107875369/107863923/107841846/107841828	LOC107875683/LOC107848258/LOC107850743/LOC107838901/LOC107861912/LOC107860664/LOC107847543/LOC107859743/LOC107870082/LOC107874909/LOC107840138/LOC107853072/LOC107843221/LOC107871481/LOC107864528/LOC107843197/LOC107863914/LOC107853990/LOC107851126/LOC107878064/LOC107851138/LOC107839270/LOC107876060/LOC107845347/LOC107870656/LOC107878815/-/LOC107875369/LOC107863923/LOC107841846/LOC107841828	sly:101258270/sly:101268737/sly:101248085/sly:101245783/sly:101263393/sly:101256146/sly:101252746/sly:101243936/sly:101253771/sly:101264455/sly:101244620/sly:101245924/sly:101258986/sly:101252182/sly:101250927/sly:544068/sly:104649355/sly:101256523/sly:101264277/sly:101268121/sly:101268243/sly:101250449/sly:101252597/sly:101251630/sly:101261705/sly:101250035/sly:101247633/sly:101259346/sly:101267…	31	26	107875683/107848258/107850743/107861912/107860664/107847543/107859743/107870082/107874909/107840138/107853072/107843221/107871481/107864528/107843197/107863914/107853990/107851126/107851138/107839270/107845347/107870656/107878815/novel.3903/107863923/107841846	5	107838901/107878064/107876060/107875369/107841828
sly00020	Citrate cycle (TCA cycle)	17/1472	50/4048	0.686811	0.998006	107859795/107843004/107870847/107862248/107867324/107847937/107864063/107860713/107848810/107853311/107840119/107878229/107855661/107860662/107858619/107862877/107859955	LOC107859795/LOC107843004/LOC107870847/LOC107862248/LOC107867324/LOC107847937/LOC107864063/LOC107860713/LOC107848810/LOC107853311/LOC107840119/LOC107878229/LOC107855661/LOC107860662/LOC107858619/LOC107862877/LOC107859955	sly:101253647/sly:101246135/sly:101253277/sly:101258932/sly:543812/sly:101254693/sly:101265278/sly:100736507/sly:101245444/sly:101259749/sly:778286/sly:101248455/sly:101260902/sly:101255848/sly:101249428/sly:101248181/sly:101256641	17	16	107859795/107843004/107870847/107862248/107867324/107847937/107864063/107860713/107848810/107853311/107878229/107855661/107860662/107858619/107862877/107859955	1	107840119
sly02010	ABC transporters	7/1472	21/4048	0.69131	0.998006	107855112/107870255/107870035/107843126/107870765/107842653/novel.2722	LOC107855112/LOC107870255/LOC107870035/LOC107843126/LOC107870765/LOC107842653/-	sly:101262724/sly:101265632/sly:101266927/sly:101261549/sly:101247740/sly:101249958/sly:101246375	7	5	107855112/107870255/107870035/107870765/107842653	2	107843126/novel.2722
sly00910	Nitrogen metabolism	8/1472	24/4048	0.693742	0.998006	107858813/107870519/107867964/107843241/107864216/107860201/107855211/107852706	LOC107858813/LOC107870519/LOC107867964/LOC107843241/LOC107864216/LOC107860201/LOC107855211/LOC107852706	sly:100147727/sly:544275/sly:100736473/sly:101254722/sly:101259288/sly:101258424/sly:101268239/sly:544015	8	5	107870519/107867964/107864216/107855211/107852706	3	107858813/107843241/107860201
sly01230	Biosynthesis of amino acids	74/1472	212/4048	0.69923	0.998006	107873413/novel.4074/107875636/107842110/107870413/107839921/107859795/novel.5223/novel.5432/107860909/107870410/107850602/107867463/107862704/107842830/107861704/107872898/107868126/107870519/107845759/107869222/107877384/107867550/107850203/107859905/107878843/107870082/107869328/107878340/107867808/107845282/107840161/107878547/107858266/107845710/107852345/107879648/107845345/107851006/107856…	LOC107873413/-/LOC107875636/LOC107842110/LOC107870413/LOC107839921/LOC107859795/-/-/LOC107860909/LOC107870410/LOC107850602/LOC107867463/LOC107862704/LOC107842830/LOC107861704/LOC107872898/LOC107868126/LOC107870519/LOC107845759/LOC107869222/LOC107877384/LOC107867550/LOC107850203/LOC107859905/LOC107878843/LOC107870082/LOC107869328/LOC107878340/LOC107867808/LOC107845282/LOC107840161/LOC107878547/LOC…	sly:543875/sly:101253321/sly:101247331/sly:101259361/sly:101250010/sly:101250548/sly:101253647/sly:101251709/sly:101245890/sly:101261134/sly:101248664/sly:101247506/sly:544153/sly:100736499/sly:101265440/sly:101260521/sly:101244195/sly:101250558/sly:544275/sly:101245503/sly:101262942/sly:101265671/sly:101247124/sly:101267301/sly:101250853/sly:101243907/sly:101253771/sly:101263236/sly:101250231/sl…	74	44	107875636/107842110/107870413/107839921/107859795/107860909/107850602/107867463/107862704/107872898/107870519/107877384/107867550/107850203/107859905/107870082/107869328/107878340/107867808/107845282/107840161/107878547/107858266/107852345/107851006/107856612/107861619/107858927/107845682/107864577/107878229/novel.6385/107843197/107870207/107861641/107851138/107855661/107843616/107878792/10785388…	30	107873413/novel.4074/novel.5223/novel.5432/107870410/107842830/107861704/107868126/107845759/107869222/107878843/107845710/107879648/107845345/107870781/107878881/107876074/107850416/107857557/107856744/107853897/107878064/107844443/107839203/107860819/107840477/107851677/107848158/107864665/107852518
sly04136	Autophagy - other	12/1472	36/4048	0.705982	0.998006	107843444/107854230/107870434/107878033/107868309/107874490/107870918/107842845/novel.2613/107873375/107857534/107863575	LOC107843444/LOC107854230/LOC107870434/LOC107878033/LOC107868309/LOC107874490/LOC107870918/LOC107842845/-/LOC107873375/LOC107857534/LOC107863575	sly:101266988/sly:101251393/sly:101254295/sly:101257003/sly:101253062/sly:101249673/sly:101259616/sly:101247744/sly:101246793/sly:101249556/sly:101261376/sly:101258340	12	10	107854230/107870434/107878033/107868309/107874490/107870918/107842845/107873375/107857534/107863575	2	107843444/novel.2613
sly00600	Sphingolipid metabolism	7/1472	22/4048	0.743268	0.998006	107862365/107838845/107839845/107870415/107868327/107862757/107871279	LOC107862365/LOC107838845/LOC107839845/LOC107870415/LOC107868327/LOC107862757/LOC107871279	sly:778364/sly:101244511/sly:101261555/sly:101249542/sly:101263975/sly:778277/sly:101257860	7	3	107862365/107838845/107839845	4	107870415/107868327/107862757/107871279
sly00340	Histidine metabolism	4/1472	13/4048	0.755493	0.998006	107853897/107851301/107851677/107846976	LOC107853897/LOC107851301/LOC107851677/LOC107846976	sly:101260925/sly:101266222/sly:101244621/sly:101254485	4	1	107851301	3	107853897/107851677/107846976
sly00300	Lysine biosynthesis	3/1472	4048-10-01	0.767168	0.998006	107868126/107879648/107856612	LOC107868126/LOC107879648/LOC107856612	sly:101250558/sly:101258465/sly:101252192	3	1	107856612	2	107868126/107879648
sly04122	Sulfur relay system	3/1472	4048-10-01	0.767168	0.998006	107859361/107860362/107871449	LOC107859361/LOC107860362/LOC107871449	sly:101247277/sly:101259389/sly:101268304	3	2	107860362/107871449	1	107859361
sly03060	Protein export	12/1472	39/4048	0.814267	0.998006	107847826/107843250/107853328/107878553/107877602/107841033/107851499/107847655/107855786/107863217/107864009/107875863	LOC107847826/LOC107843250/LOC107853328/LOC107878553/LOC107877602/LOC107841033/LOC107851499/LOC107847655/LOC107855786/LOC107863217/LOC107864009/LOC107875863	sly:101248267/sly:101251215/sly:101248563/sly:101266091/sly:101266797/sly:101250277/sly:101254464/sly:101257139/sly:101266477/sly:101257737/sly:101248030/sly:101243898	12	4	107847826/107877602/107855786/107875863	8	107843250/107853328/107878553/107841033/107851499/107847655/107863217/107864009
[truncated: 45 more rows]

## Sheet: cp0vscc0_KEGGenrich
KEGGID	Description	GeneRatio	BgRatio	pvalue	padj	geneID	geneName	keggID	Count	Up	Up_Gene_names	Down	Down_Gene_names
[truncated: 115 more rows]

## Sheet: cp2vscc2_KEGGenrich
KEGGID	Description	GeneRatio	BgRatio	pvalue	padj	geneID	geneName	keggID	Count	Up	Up_Gene_names	Down	Down_Gene_names
[truncated: 115 more rows]

## Sheet: cp6vscc6_KEGGenrich
KEGGID	Description	GeneRatio	BgRatio	pvalue	padj	geneID	geneName	keggID	Count	Up	Up_Gene_names	Down	Down_Gene_names
[truncated: 115 more rows]

[truncated: 1 more sheets: cp12vscc12_KEGGenrich]
