# Supplementary material for: Integrated Transcriptomic and Metabolomic Analyses of Cold-Tolerant and Cold-Sensitive Pepper Species Reveal Key Genes and Essential Metabolic Pathways Involved in Response to Cold Stress
Source: Int J Mol Sci. 2022 Jun 15;23(12):6683. doi: 10.3390/ijms23126683 (PMC9224482; doi:10.3390/ijms23126683)
Supplement: Supplementary file 1 [file ijms-23-06683-s001.zip › S4_DAMs All comparisons.xlsx]

## Sheet: cp6vscp0_DAMs
ID	Name_des	Formula	Molecular Weight	RT [min]	ChemSpider_Results	mzCloud_Results	TCM_Results	pos_DGL6_1	pos_DGL6_2	pos_DGL6_3	pos_DGL6_4	pos_DGL6_5	pos_DGL6_6	pos_DG_1	pos_DG_2	pos_DG_3	pos_DG_4	pos_DG_5	pos_DG_6	FC	log2FC	Pvalue	ROC	VIP
Com_1001_pos	phenylamine	C6 H7 N	93.0577	1.265	Full match	No results	No results	966582	977809	809352	843562	934705	958395	840246	777099	757988	419954	825185	813567	1.23824	0.308291	0.0833735	0.916667	0.314789
Com_1002_pos	Phenylacetylglycine dimethylamide	C12 H16 N2 O2	220.121	5.656	Full match	No results	No results	19457.9	35556.6	64330.6	50310.6	41432	39252.7	214802	185726	196789	266550	200607	237061	0.192343	-2.37825	5.81612e-05	1	2.23762
Com_1009_pos	Phenylacetylene	C8 H6	102.047	7.74	Full match	Invalid mass	No results	276905	297518	325710	307217	242521	245573	384183	324606	426515	245799	237354	381293	0.847828	-0.238156	0.230918	0.694444	0.203237
Com_1013_pos	Phenyl{[4-(4,4,5,5-tetramethyl-1,3,2-dioxaborolan-2-yl)phenyl]amino}acetonitrile	C20 H23 B N2 O2	334.184	1.337	Full match	Invalid mass	No results	1.39478e+07	1.63757e+07	8.08721e+06	9.98498e+06	1.64574e+07	3.41305e+06	1.50403e+07	1.86272e+07	3.09956e+07	2.43007e+07	1.10136e+07	1.76116e+07	0.580548	-0.784512	0.0638223	0.861111	0.810868
Com_1014_pos	Phenyl(3-phenylpropyl)silane	C15 H18 Si	226.118	6.916	Full match	No results	No results	208183	237465	164154	163214	317335	225134	54050.9	253660	163731	141488	79685.7	124377	1.61015	0.687199	0.0537493	0.833333	0.746653
Com_1015_pos	Phenyl sulfoxide	C12 H10 O S	202.045	1.388	Full match	No results	No results	444856	387298	368552	517323	307470	439586	205034	253881	180552	231897	207512	111279	2.07123	1.05049	0.000610668	1	0.981767
Com_1016_pos	Phenyl salicylate	C13 H10 O3	214.063	8.036	Full match	No results	No results	8937.88	5292.73	2395.91	6687.75	7572.77	6284.02	2330.97	2185.95	2401.63	1664.61	2710.63	2922.33	2.61471	1.38665	0.00351539	0.916667	1.18944
Com_1019_pos	Phenyl 3,4,6-tri-O-benzyl-1-thio-beta-D-galactopyranoside	C33 H34 O5 S	542.213	10.752	Full match	No results	No results	9417.08	10812.9	13364.7	12631	9359.04	10733.3	52384.1	73730.4	158013	44523.9	11582.4	76572.3	0.15911	-2.6519	0.00605642	0.944444	2.10391
Com_1020_pos	Phenyl 2-(1,9-diazatetracyclo[7.7.1.0~2,7~.0~10,15~]heptadeca-2,4,6,10,12,14-hexaen-5-yl)-3-methylbenzoate	C29 H24 N2 O2	432.186	1.324	Full match	No results	No results	86460.1	115788	82162.9	80172.7	74262.4	78518.4	161143	99429	75985.7	147503	80877.9	95299.4	0.783604	-0.351804	0.175283	0.722222	0.284526
Com_1021_pos	Phenyl (1R,2S,4R)-5,6-bis(4-hydroxyphenyl)-7-oxabicyclo[2.2.1]hept-5-ene-2-sulfonate	C24 H20 O6 S	436.097	8.097	Full match	No results	No results	14144.2	8835.19	23574.7	19209.3	15279.7	10811.2	25574.3	11877.1	21081.8	114723	12451.5	20011.8	0.446502	-1.16326	0.221606	0.722222	0.695093
Com_1022_pos	Phenprocoumon	C18 H16 O3	280.109	8.439	Full match	No results	No results	2168.02	1663.18	1897.39	1471.15	2038.9	6121.78	8061.96	9185.9	4060.9	2764.97	2335.75	5528.76	0.480941	-1.05607	0.0377332	0.888889	0.974252
Com_1023_pos	phenprobamate	C10 H13 N O2	179.094	7.042	Full match	No results	No results	35678.3	32278.5	38309.6	33626.5	33952.7	35774	91266.6	81084.4	90203.4	88404	91569.4	118708	0.373497	-1.42083	5.45089e-07	1	1.28689
Com_1025_pos	Phenol, 3-(2-(1,1-dimethylethyl)-3-methyl-5-oxazolidinyl)-	C14 H21 N O2	235.157	9.782	Full match	Invalid mass	No results	563461	479630	233058	236627	349599	326630	143968	391770	109483	91356.7	247967	167964	1.89934	0.925498	0.024997	0.833333	0.956713
Com_1026_pos	Phenol, 2-(3,7-dimethylocta-2,6-dienyl)-	C16 H22 O	230.167	10.085	Full match	No results	No results	10051.8	5340.64	7819.73	5635.17	5821.77	6991.26	8895.64	7561.62	7784.74	10725.2	8873.5	7836.28	0.806168	-0.310848	0.0720548	0.805556	0.306708
Com_1028_pos	Phenol	C6 H6 O	94.0417	12.303	Full match	Invalid mass	No results	1.85052e+06	1.38042e+06	1.85841e+06	2.05348e+06	1.86318e+06	1.99486e+06	1.10915e+06	2.34251e+06	1.69736e+06	1.32676e+06	933330	1.65464e+06	1.21372	0.279438	0.160268	0.777778	0.307057
Com_1034_pos	Phenobarbital	C12 H12 N2 O3	232.084	7.429	Full match	No results	No results	105627	78920.8	166180	53465	128773	67823	6028.46	7768.03	5815.8	9772.44	5547.52	5586.97	14.8272	3.89018	1.23124e-06	1	3.48395
Com_1035_pos	Phenethylamine	C8 H11 N	121.089	5.541	Full match	No results	No results	43727.5	35768	44876.7	46967.1	33390.7	50981.4	59070.5	55591.3	47159.9	41792	57294.1	49478	0.823851	-0.279546	0.0461841	0.833333	0.265018
Com_1038_pos	Phenanthrene	C14 H10	178.078	13.072	Full match	No results	No results	2.84373e+06	2.65301e+06	2.6374e+06	2.7337e+06	2.66615e+06	2.7886e+06	3.18438e+06	2.50989e+06	2.86109e+06	3.02089e+06	2.50408e+06	2.81426e+06	0.966143	-0.0496918	0.485376	0.638889	0.0484757
Com_1042_pos	Phellamurin	C26 H30 O11	518.178	9.487	Full match	Invalid mass	No results	107541	104943	69182.2	98406.7	101237	211344	39313	35547.6	26427	23994.2	40193.6	31056.1	3.52439	1.81737	0.000101328	1	1.60115
Com_1043_pos	Phebaclavin A	C16 H16 O6	304.094	12.69	Full match	Invalid mass	No results	1.29883e+06	1.13953e+06	1.85643e+06	2.19971e+06	2.09571e+06	1.94896e+06	1.91595e+06	1.84071e+06	1.88349e+06	2.45443e+06	1.15934e+06	1.82429e+06	0.951342	-0.0719646	0.716296	0.527778	0.122223
Com_1044_pos	Phaseolin	C20 H18 O4	322.12	8.196	Full match	No results	No results	86319.4	67015.5	61623.7	84507	75614.7	93199.5	175520	109034	57191	121835	66124.3	50113.6	0.807632	-0.308229	0.584074	0.527778	0.160685
Com_1045_pos	Phaseolic acid	C13 H12 O8	296.052	7.882	Full match	No results	No results	44053.7	54713	72314.2	72889.5	45103.5	40712.9	90853.4	96810.7	81848.6	55653.3	46030.8	67761.3	0.751295	-0.412549	0.108799	0.805556	0.373752
Com_1047_pos	PH 51-07	C8 H5 Cl N2 O S2	243.954	0.977	Full match	No results	No results	1.80385e+06	1.85268e+06	1.63164e+06	1.42014e+06	1.62658e+06	1.70701e+06	2.32344e+06	2.01855e+06	1.84752e+06	1.93535e+06	2.23597e+06	1.97991e+06	0.813719	-0.297397	0.0029167	0.972222	0.272678
Com_1050_pos	Petrobactin	C34 H50 N6 O11	718.355	13.83	Full match	No results	No results	45604.6	41890.7	53063.7	47741.2	82313.7	74582.6	140136	169131	166700	103385	75128.9	75896.1	0.472627	-1.08122	0.00377719	0.944444	0.956211
Com_1051_pos	perthamide C	C43 H64 N10 O14	944.456	12.583	Full match	No results	No results	4.99606e+07	3.66929e+07	4.28653e+07	2.72996e+07	4.36253e+07	4.57679e+07	1.94302e+07	2.34075e+07	1.17902e+07	1.47091e+07	3.99858e+07	1.60227e+07	1.96427	0.97399	0.006281	0.944444	0.981689
Com_1052_pos	Perrottetinene	C24 H28 O2	348.208	13.035	Full match	Invalid mass	No results	566727	370980	447012	417898	532854	429149	491017	787818	579036	455119	411878	837865	0.775983	-0.365903	0.135165	0.75	0.299205
Com_1053_pos	Perphenazine	C21 H26 Cl N3 O S	403.147	6.063	Full match	No results	No results	18556.6	11725.2	6875.88	9367.29	18632.4	5418.19	6033.31	9316.67	11510.7	6421.46	6330.05	6816.18	1.5201	0.604162	0.18116	0.75	0.452459
Com_1054_pos	Peridinin	C39 H50 O7	630.358	11.722	Full match	No results	No results	19687.7	32665.9	29174.6	39351.6	28812.5	32377.2	12926	21644.4	10210.6	10103.5	11166.9	13770	2.28096	1.18964	0.000261683	0.972222	1.10489
Com_1055_pos	Periciazine	C21 H23 N3 O S	365.158	7.05	Full match	No results	No results	20609.9	23029.4	26587.3	25432.2	17463.5	15107.2	10485.5	10267.8	10153.2	8304.91	7880.95	7440.15	2.35143	1.23354	3.18135e-05	1	1.11246
Com_1058_pos	Peptidoglycan(N-acetyl-D-glucosamine)	C34 H60 N8 O18	868.399	12.469	Full match	No results	No results	383594	114686	69694.5	67130.6	56625.7	213356	38661.1	51337.8	45137.1	33045.7	188452	45540.6	2.25049	1.17024	0.0877208	0.888889	1.05655
Com_105_pos	Vanillic acid	C8 H8 O4	168.042	13.954	Full match	Invalid mass	No results	7.5204e+06	6.29941e+06	1.10714e+07	5.89247e+06	6.67258e+06	5.29151e+06	4.48857e+06	6.01788e+06	6.98545e+06	3.97297e+06	3.87564e+06	8.99081e+06	1.24515	0.316322	0.203595	0.694444	0.332754
Com_1060_pos	pentenylbenzene	C11 H14	146.109	11.535	Full match	Invalid mass	No results	595574	627919	893471	639728	695967	598130	547423	616430	648065	414774	277398	387714	1.40078	0.486233	0.0398764	0.833333	0.502292
Com_106_pos	Valpromide	C8 H17 N O	143.131	10.711	Full match	No results	No results	21963.1	24223.4	24276.9	24612.7	28827.7	30626.5	22859.6	19012.7	22548.3	20833.6	18061.8	23892.3	1.21478	0.280697	0.017725	0.916667	0.258688
Com_1073_pos	Pentafluorobenzyl 2-methyloctanoate	C16 H19 F5 O2	338.129	9.96	Full match	No results	No results	164618	157074	223074	205374	91054.1	135182	77987.8	51639.1	43288.3	66706.6	122040	52705.3	2.3563	1.23653	0.00145621	0.972222	1.15649
Com_1075_pos	penicitrinol F	C15 H20 O4	264.135	7.244	Full match	No results	No results	102875	114318	121795	101407	99730.8	106313	106235	61030.1	71135.6	57001.7	46078.8	78997.2	1.53739	0.620481	0.00991675	0.916667	0.619072
Com_1076_pos	Penicillin F	C14 H20 N2 O4 S	312.114	6.057	Full match	No results	No results	216986	260101	228504	305699	258260	223808	137675	156779	73548.1	110876	245748	161832	1.68463	0.752435	0.0154371	0.916667	0.773792
Com_1077_pos	Penfluridol	C28 H27 Cl F5 N O	523.172	7.406	Full match	No results	No results	126750	51997.9	114447	51456.6	65228.3	62076.4	193964	54128.9	84221.1	89635.2	29226.2	77458.4	0.892784	-0.163616	0.943299	0.555556	0.249648
Com_107_pos	Valine	C5 H11 N O2	117.079	1.394	Not the top hit	Full match	Full match	2.67387e+07	2.5778e+07	2.07828e+07	3.01395e+07	2.60398e+07	2.13613e+07	1.63243e+07	1.70917e+07	1.65051e+07	1.51666e+07	1.89957e+07	1.06016e+07	1.59307	0.671812	0.00111488	1	0.623353
Com_1080_pos	Pelretin	C23 H28 O2	336.208	14.826	Full match	No results	No results	11982.7	14904.4	21309.9	20328.6	17364	15514	23339.7	25674.1	26305.4	22169.4	16796.4	19727.7	0.756671	-0.402261	0.0290804	0.861111	0.38126
Com_1082_pos	pelargonidin 3-O-(6-O-caffeoyl-beta-D-glucoside) 5-O-beta-D-glucoside betaine	C36 H36 O18	756.188	10.065	Full match	No results	No results	18492.6	20198.4	13751.2	12752.5	13374.8	14210.3	25556.6	17956.5	16352.6	16594	16350.7	17149.6	0.84376	-0.245095	0.133149	0.722222	0.225892
Com_1084_pos	PEG-4	C8 H18 O5	194.115	10.981	Full match	No results	No results	3951.73	3363.56	3403.87	9640.21	3303.26	8957.84	6466.51	6973.94	5904.96	6629.89	5074.44	6168.63	0.876462	-0.190237	0.302154	0.666667	0.324533
Com_1086_pos	Pectolinarigenin	C17 H14 O6	314.078	9.392	Full match	No results	No results	7938.96	7325.16	9816.97	8425.66	6986.32	8798.55	7663.44	7021.6	7451.46	7344.58	8188.32	7498.43	1.0913	0.126047	0.181282	0.666667	0.107806
Com_1089_pos	P-DMEA	C4 H12 N O4 P	169.05	5.543	Full match	No results	No results	82065.1	65664.4	55926.2	70443.2	69085	69157.2	73479.5	53812.1	71952.4	60391.3	46020	69542.1	1.099	0.136188	0.293647	0.583333	0.141565
Com_108_pos	Valienamine	C7 H13 N O4	175.084	1.9	Full match	Invalid mass	No results	4.45845e+06	3.7373e+06	3.99867e+06	2.90952e+06	3.61909e+06	3.22612e+06	2.34296e+06	2.87385e+06	2.56904e+06	2.93065e+06	1.57318e+06	3.66979e+06	1.37531	0.459752	0.0336037	0.888889	0.46129
Com_1090_pos	PD-169316	C20 H13 F N4 O2	360.102	6.242	Full match	Invalid mass	No results	135300	84052.7	111101	88387.7	84060.8	94845.8	108782	122073	114758	98576.1	72936.5	58407.9	1.0386	0.0546343	0.706643	0.5	0.0793663
Com_1092_pos	p-cymene	C10 H14	134.109	8.894	Full match	Invalid mass	No results	541656	354850	347793	256917	347295	343180	1.44318e+06	358382	768635	1.92275e+06	1.02075e+06	978222	0.337603	-1.5666	0.00682021	0.972222	1.29746
Com_10_pos	a-Eleostearic acid	C18 H30 O2	278.224	13.754	Not the top hit	Full match	Full match	2.93129e+06	5.76582e+06	3.79731e+06	5.15522e+06	3.3381e+06	3.95331e+06	729814	957743	632817	990644	1.38367e+06	695846	4.62682	2.21002	2.30507e-06	1	2.02518
Com_1100_pos	P-COUMARYL ALCOHOL 4-GLUCOSIDE	C15 H20 O7	312.122	9.945	Full match	No results	No results	10533	7767.85	8726.65	8020.83	7584.92	12113.7	12184.1	21515.9	11420.1	11882.3	10890	11987.7	0.685365	-0.545057	0.019709	0.888889	0.479524
Com_1102_pos	p-coumaroylputrescine	C13 H18 N2 O2	234.136	6.343	Full match	Invalid mass	No results	5.00114e+06	6.20361e+06	8.64502e+06	1.22972e+07	7.74505e+06	7.88176e+06	8.08775e+06	1.13257e+07	9.89778e+06	1.68086e+07	1.4217e+07	1.07843e+07	0.671725	-0.574058	0.0323503	0.861111	0.538474
Com_1103_pos	p-coumaroylagmatine	C14 H20 N4 O2	276.158	7.112	Full match	Invalid mass	No results	9090.53	7162.62	7911.27	7379.49	7161.14	8928.21	9575.55	9129.09	8285.37	10018	13025.3	8680.76	0.811276	-0.301736	0.0310645	0.888889	0.275859
Com_1104_pos	PCB-126	C12 H5 Cl5	323.883	1.083	Full match	No results	No results	90360.8	127195	113677	110080	108533	117962	105834	89651.2	98417.4	123688	68373.7	152705	1.04562	0.0643613	0.581114	0.638889	0.140705
Com_1105_pos	PC(22:0/18:3(9Z,12Z,15Z))	C48 H90 N O8 P	839.642	11.346	Full match	No results	No results	1832.81	414.441	3374.15	445.309	397.354	1733.65	2554.55	3009.52	1069.2	3650.78	8622.49	753.145	0.416981	-1.26195	0.111101	0.777778	1.22665
Com_1106_pos	p-Bromophenylboric acid	C6 H6 B Br O2	199.965	1.029	Full match	No results	No results	9.5175e+07	9.39613e+07	8.31922e+07	7.97387e+07	6.70165e+07	8.48232e+07	8.53542e+07	6.61206e+07	8.71024e+07	1.04278e+08	6.08525e+07	9.60874e+07	1.00823	0.011821	0.850294	0.555556	0.0783957
Com_1107_pos	Patrinoside	C21 H34 O11	462.208	14.578	Full match	No results	No results	208003	192599	224754	210962	145069	212604	198864	230415	203665	226699	216439	215923	0.924138	-0.113819	0.249107	0.722222	0.115352
Com_1108_pos	Parishin B	C32 H40 O19	728.22	8.383	Full match	No results	No results	11606.1	15170.6	14636.4	15558	13280.2	23611.2	18582	11797.4	11723	15127.1	8617.1	19830.6	1.09554	0.131637	0.527714	0.583333	0.170804
Com_1109_pos	Parbendazole	C13 H17 N3 O2	247.132	6.913	Full match	Invalid mass	No results	184874	189527	216078	242960	159558	240406	129847	216805	198748	132032	170938	223515	1.15069	0.202493	0.233167	0.666667	0.2019
Com_1111_pos	Paramethadione	C7 H11 N O3	157.074	1.344	Full match	No results	No results	414814	1.10132e+06	1.14373e+06	1.43264e+06	1.04363e+06	1.24807e+06	879585	1.18632e+06	993967	563684	1.44473e+06	2.16925e+06	0.882096	-0.180992	0.694588	0.472222	0.147227
Com_1112_pos	paralemnanol D	C17 H26 O3	278.187	13.89	Full match	Invalid mass	No results	50928.5	63156.4	70940.7	49875.3	62542.6	58541.2	21783.1	27079.1	19357	26829.8	16036.7	28849.7	2.54392	1.34705	2.20258e-05	1	1.25081
Com_1114_pos	Paradol	C17 H26 O3	278.187	12.777	Full match	No results	No results	27580.9	26640.9	27455.1	23854.2	27924	27683.5	11324.2	10932	17046.3	12004.8	13757.8	10742.1	2.12564	1.0879	5.09711e-05	1	1.00801
Com_1116_pos	pantoic acid	C6 H12 O4	148.073	3.428	Full match	Invalid mass	No results	100077	122252	105943	120793	80783.5	113837	98401.3	90260	92846	165032	93809.5	84616.6	1.02995	0.0425801	0.694984	0.694444	0.0691951
Com_1119_pos	Paeonolide	C20 H28 O12	460.157	7.452	Full match	Invalid mass	No results	18459.6	18300.8	17199.2	18622.2	17970.5	21754.9	23933.4	19190.6	19288.4	22390.3	22388	17854.4	0.898135	-0.154996	0.100496	0.805556	0.139339
Com_111_pos	Validamycin A	C20 H35 N O13	497.212	8.765	Full match	Invalid mass	No results	6327.82	5210.45	5444.67	12039.3	5792.89	6154.29	11306.2	5617.85	5742.04	6374.36	6236.26	5807.46	0.997209	-0.00403248	0.931092	0.583333	0.0312347
Com_1123_pos	OXYNITIDINE	C21 H17 N O5	363.109	1.409	Full match	No results	No results	107458	106261	81455.1	139583	93391.4	110365	242101	98849.9	214364	173210	206687	123191	0.603279	-0.729102	0.0205077	0.861111	0.620736
Com_1124_pos	oxymesterone	C20 H30 O3	318.219	0.612	Full match	No results	No results	90998.8	77721.6	76393.9	90492.4	105363	113022	122361	102582	105336	121888	105313	102096	0.839921	-0.251674	0.0386987	0.777778	0.239097
Com_1126_pos	Oxymatrine	C15 H24 N2 O2	264.187	13.146	No results	Invalid mass	No results	7.97675e+06	6.70535e+06	6.39931e+06	6.66835e+06	5.965e+06	6.58575e+06	6.33063e+06	6.38354e+06	6.47125e+06	6.98224e+06	6.1603e+06	7.90299e+06	1.00173	0.00249184	0.979565	0.583333	0.00373615
Com_1127_pos	Oxybuprocaine	C17 H28 N2 O3	308.21	14.381	Full match	No results	No results	26846.3	23692	37755.5	26818.4	18396.1	28675.3	40187	81893.4	62472.8	79808.3	49979.3	61117.6	0.431962	-1.21102	0.000229746	1	1.09381
Com_112_pos	valganciclovir	C14 H22 N6 O5	354.165	10.938	Full match	No results	No results	328153	365205	287960	398843	327259	293910	151326	406996	374886	107464	120491	186885	1.48461	0.570087	0.0727654	0.694444	0.694036
Com_1131_pos	Oxoadipate	C6 H6 O5	158.021	1.326	Not the top hit	No results	No results	519959	509363	613579	542593	486591	621574	7.83589e+06	7.1953e+06	6.77301e+06	7.00292e+06	5.84927e+06	7.40123e+06	0.078313	-3.6746	8.97987e-13	1	3.34806
Com_1134_pos	oxiracetam	C6 H10 N2 O3	158.069	1.198	Full match	Invalid mass	No results	117308	49167	94529.7	59810.8	86919.9	108219	81405.3	104907	99137.8	91623	205794	126334	0.727515	-0.458951	0.137845	0.694444	0.432491
Com_1135_pos	Oxindole	C8 H7 N O	133.053	6.307	Full match	Invalid mass	No results	40588.6	46098.3	41948.4	38836.9	35045	40265.2	41728.8	38834.9	55848.9	44246.6	63289.2	49554.7	0.827189	-0.273711	0.0699544	0.777778	0.237268
Com_1136_pos	oxidized dinoflagellate luciferin	C33 H38 N4 O7	602.273	11.647	Full match	No results	No results	28623.5	25331.3	23508.9	16381.9	20646.8	21041.5	31298.6	29641	23350	31100.7	26847.5	37770.6	0.752931	-0.40941	0.0191572	0.888889	0.378612
Com_1138_pos	oxeladin	C20 H33 N O3	335.245	9.626	Full match	No results	No results	12730.9	12136.2	12980.7	13000.9	12906.8	12241.8	15958.4	12888.1	14040.6	14546.4	13145.6	14859.2	0.889499	-0.168935	0.0148816	0.916667	0.152292
Com_1139_pos	oxandrolone	C19 H30 O3	306.219	11.668	Full match	No results	No results	236306	388324	456772	424949	336103	301138	58604.6	58058.9	32162.9	45505	86357.9	23163.4	7.05471	2.81859	2.17411e-05	1	2.65156
Com_1143_pos	oxamniquine	C14 H21 N3 O3	279.158	8.388	Full match	Invalid mass	No results	632001	584355	602749	652069	709823	595410	558606	607396	496043	584840	267007	533622	1.23918	0.309382	0.108405	0.888889	0.340923
Com_1144_pos	Oxaceprol	C7 H11 N O4	173.069	1.819	Full match	Invalid mass	No results	427096	484912	514623	813943	508240	513479	624532	561281	689967	555826	804251	616159	0.846906	-0.239727	0.127039	0.833333	0.242509
Com_1146_pos	Ouabain	C29 H44 O12	584.28	12.1	Full match	No results	No results	36271.3	35556.8	39912.3	53886.2	38992.8	65874.4	18108.4	44682.1	25761.4	14855.9	19360.1	19901	1.89596	0.922925	0.00594087	0.888889	0.896426
Com_1147_pos	Ouabagenin	C23 H34 O8	438.225	8.956	Full match	No results	No results	23871.3	32009.1	24497.1	14097.1	33878.4	14932.5	30087.6	28183.6	17989.5	39924.4	24876.9	13010.4	0.929989	-0.104715	0.776231	0.555556	0.0919306
Com_1153_pos	ostruthin	C19 H22 O3	298.156	13.108	Full match	No results	No results	25740.7	24352.9	36158.2	34606.5	27442.1	36335.9	25637	31222.7	22989.9	18415.9	29261.6	21985.5	1.23492	0.304419	0.0791726	0.805556	0.283097
Com_1155_pos	Osthenol-7-O-beta-D-gentiobioside	C26 H34 O13	554.201	12.135	Full match	No results	No results	43042.3	48029.1	53294.7	31818.7	50239.4	38604.7	31187.3	63190.1	23440.1	28021.8	37905.7	31077.1	1.23371	0.303008	0.15949	0.805556	0.329983
Com_1156_pos	Oryzanol A	C40 H58 O4	602.433	12.318	Full match	No results	No results	325433	352293	511208	518779	374834	414640	289147	492015	403991	219471	233997	376702	1.2391	0.309292	0.15327	0.722222	0.320278
Com_1158_pos	ortho-Phthalaldehyde	C8 H6 O2	134.037	7.566	Full match	Invalid mass	No results	107787	285470	92745.1	85380.8	163232	100208	168055	116100	137285	200705	168432	160984	0.877319	-0.188826	0.324383	0.75	0.284628
Com_115_pos	Valeroidine	C13 H23 N O3	241.167	7.505	Full match	No results	No results	230976	195944	53361.7	113569	153802	54441.9	244271	130822	100283	404095	71914.4	108244	0.756956	-0.401718	0.517382	0.416667	0.331968
Com_1160_pos	Orientin	C21 H20 O11	448.1	7.286	Full match	Full match	Full match	343210	499365	943795	945731	738557	584686	1.10697e+06	1.32619e+06	1.40381e+06	541931	370580	868045	0.721909	-0.470112	0.323033	0.694444	0.404625
Com_1163_pos	Ophiopogonin B	C39 H62 O12	722.422	14.295	Full match	No results	No results	187482	151182	163751	193742	188801	233299	49637.9	148616	181256	137384	78420.5	69302.6	1.68256	0.750654	0.0306748	0.944444	0.807261
Com_1166_pos	onchidionol	C37 H56 O9	644.391	14.803	Full match	No results	No results	20328.2	16022.8	36001	26186.4	21725.2	21513.1	18303.3	51301.7	42896.1	35874.4	44495.5	49906.4	0.583978	-0.776015	0.0247538	0.833333	0.681527
Com_1167_pos	onchidione	C37 H54 O9	642.375	13.9	Full match	No results	No results	203955	89447.3	184503	111927	131656	236537	43796.9	130682	119624	110101	62688.9	103133	1.68067	0.749037	0.0473016	0.833333	0.69989
Com_1168_pos	Omeprazole	C17 H19 N3 O3 S	345.116	1.327	Full match	No results	No results	154525	111472	114793	149662	132286	129234	101133	148885	125007	142797	100425	114124	1.08138	0.112875	0.368949	0.694444	0.108699
Com_1169_pos	Ombuin	C17 H14 O7	330.073	8.594	Full match	Invalid mass	No results	401147	296948	571434	628871	473172	552838	228994	203021	124421	102246	218716	202107	2.70903	1.43777	0.000238323	1	1.32771
Com_1174_pos	Olivetol	C11 H16 O2	180.115	12.397	Full match	No results	No results	586298	430858	506675	471185	442915	449054	980847	702066	560069	536691	901438	1.04954e+06	0.610273	-0.712474	0.00908356	0.944444	0.615527
Com_1177_pos	oleoyl-lysophosphatidylcholine	C26 H52 N O7 P	521.347	14.654	Full match	Invalid mass	No results	6.08231e+06	1.11461e+07	1.25556e+07	1.81766e+07	1.21522e+07	1.19945e+07	2.81343e+06	4.84294e+06	3.00601e+06	2.21802e+06	6.74041e+06	3.87716e+06	3.06866	1.61761	0.000415869	0.972222	1.50471
Com_1178_pos	Oleoylethanolamide	C20 H39 N O2	325.297	14.83	Full match	No results	No results	149894	169129	148196	107327	94898	133728	89781.1	75468.3	55685.5	189327	62349.3	49078.7	1.53956	0.622517	0.0470409	0.833333	0.696668
Com_117_pos	Valerenic acid	C15 H22 O2	234.161	9.542	Full match	No results	No results	87554.4	88499	93434.9	73738.1	85985.6	95945.5	88858.8	72917.8	103719	93656.3	58885.9	89081.7	1.03557	0.0504247	0.615828	0.527778	0.118591
Com_1184_pos	Oleandrin	C32 H48 O9	576.329	13.127	Full match	Invalid mass	No results	7.23054e+07	7.38122e+07	6.5504e+07	9.89975e+07	7.0308e+07	6.2305e+07	5.2804e+07	7.15331e+07	7.19375e+07	6.59498e+07	6.42686e+07	5.69557e+07	1.15591	0.209029	0.126907	0.75	0.184989
Com_1185_pos	oleandolide	C20 H34 O7	386.229	14.081	Full match	No results	No results	812574	982504	1.1989e+06	939975	949191	574957	547956	358542	717574	339869	200611	495883	2.05158	1.03674	0.00626128	0.972222	1.04131
Com_1186_pos	Oleamide	C18 H35 N O	281.271	14.895	Full match	Full match	No results	1.09151e+09	1.2811e+09	8.6759e+08	1.0221e+09	1.09217e+09	6.19319e+08	1.17374e+09	1.06876e+09	1.02456e+09	1.12376e+09	1.64182e+09	9.97931e+08	0.849689	-0.234993	0.208177	0.666667	0.239308
Com_1187_pos	Olaparib	C24 H23 F N4 O3	434.176	8.282	Full match	No results	No results	142954	65473.2	126104	56678.8	138436	139128	181537	69130.3	62165.9	113371	40699	34366.5	1.33416	0.415931	0.237148	0.694444	0.539574
Com_1189_pos	O-Demethylpuromycin	C21 H27 N7 O5	457.209	9.362	Full match	No results	No results	43320.6	38010.7	41228.9	40094.9	39112.3	42402.8	33905.1	31210.7	36780	32151.2	42726	37242.8	1.1409	0.19017	0.0331894	0.861111	0.180833
Com_118_pos	val-arg	C11 H23 N5 O3	273.18	11.093	Full match	No results	No results	23982.5	21791.5	17891.8	19240.8	17553.4	19563.2	6476.39	6860.95	6498.36	8070.16	4507.6	6952.02	3.04895	1.60831	1.45508e-06	1	1.47936
Com_1190_pos	Odanacatib	C25 H27 F4 N3 O3 S	525.171	11.362	Full match	No results	No results	10014.4	8742.06	10235.1	8894.85	8758.21	9244.61	11381.4	10285.4	9989.9	10419	10084.7	9152.58	0.91154	-0.133622	0.044853	0.833333	0.121746
Com_1195_pos	octyl methoxycinnamate	C18 H26 O3	290.187	11.285	Full match	No results	No results	400896	367163	359021	349841	351228	323879	492776	340838	441267	557582	291209	346943	0.87105	-0.199173	0.322099	0.555556	0.170824
Com_1196_pos	Octyl cyanoacrylate	C12 H19 N O2	209.141	11.944	Full match	Invalid mass	No results	106358	93215	138323	104892	87879.1	103403	150695	120203	120319	191894	201264	158009	0.672837	-0.57167	0.00668782	0.944444	0.508727
Com_1197_pos	Octyl alpha-D-glucopyranoside	C14 H28 O6	292.188	11.74	Full match	Invalid mass	No results	1.31366e+07	1.19797e+07	1.11433e+07	1.14225e+07	1.05905e+07	1.19368e+07	1.0124e+07	8.62014e+06	8.07901e+06	1.00757e+07	1.48917e+07	1.09401e+07	1.11922	0.162495	0.207807	0.805556	0.185213
Com_1198_pos	Octyl (4xi)-2-deoxy-2-[(Z)-(1-hydroxyethylidene)amino]-alpha-D-xylo-hexopyranoside	C16 H31 N O6	333.214	11.707	Full match	No results	No results	221262	269487	341906	548988	359861	494638	187136	231776	176278	115886	108173	166890	2.26757	1.18115	0.00156895	0.972222	1.05829
Com_11_pos	Zuclopenthixol	C22 H25 Cl N2 O S	400.136	12.32	Full match	No results	No results	992124	1.34083e+06	1.15257e+06	955630	653893	1.47283e+06	607966	859413	790328	480285	741178	742544	1.55574	0.637598	0.0169154	0.888889	0.560943
Com_1200_pos	octocrylene	C24 H27 N O2	361.203	8.201	Full match	Invalid mass	No results	90760.8	73755.9	79606.5	104485	71431.6	82722.3	15871.1	9699.75	8018.55	10513.4	14453.1	7164.51	7.65001	2.93546	1.83324e-06	1	2.71765
Com_1201_pos	ocinaplon	C17 H11 N5 O	301.098	7.402	Full match	No results	No results	34867.7	15759.1	35158.6	29894.8	32199.3	20875.1	32710.9	39157.7	27859.9	36051.6	14295.8	17552.8	1.00672	0.00965864	0.888894	0.472222	0.114725
Com_1202_pos	obyanamide	C30 H41 N5 O6 S	599.276	11.498	Full match	Invalid mass	No results	233033	145585	194173	66112.6	188453	111179	129222	170943	71082.8	84749.4	225704	120720	1.16963	0.22605	0.563221	0.611111	0.23033
Com_1204_pos	Obeticholic acid	C26 H44 O4	420.323	15.297	Full match	Invalid mass	No results	14181.4	8645.42	11323.2	12799	10449.7	12931.3	14589.7	12431.9	15288	19114.5	14461.7	12388	0.796725	-0.327846	0.0415216	0.833333	0.301234
Com_1205_pos	O-beta-D-glucosyl-trans-zeatin	C16 H23 N5 O6	381.164	5.944	Full match	No results	No results	36516.5	29961.4	30541.9	38833	39664.8	42232.1	40185.5	28241.4	33303.1	59459.6	50683.3	41247	0.860263	-0.217151	0.335109	0.666667	0.171778
Com_1206_pos	OA-6129 B2	C20 H31 N3 O8 S	473.183	7.825	Full match	No results	No results	66272.6	49229.6	42540.5	31034.2	46927.2	47435.3	60361.6	44606.9	41942.9	55751.2	46910.8	51537.1	0.941314	-0.0872527	0.52181	0.555556	0.101612
Com_120_pos	Valaciclovir	C13 H20 N6 O4	324.154	9.64	Full match	No results	No results	1.4099e+06	334162	642724	530660	817728	578869	16091.8	17662.2	13869.3	14857.8	33421.9	18591	37.6792	5.2357	1.47872e-07	1	4.70027
Com_1210_pos	nygerone A	C24 H22 N2 O5	418.155	9.672	Full match	No results	No results	26593.2	22979.2	24687.9	26031.5	25827.2	27169.9	345129	28832.5	80756.3	121899	25677.3	27911	0.243237	-2.03957	0.0828827	0.888889	1.23585
Com_1211_pos	Nudicauline	C38 H50 N2 O11	710.338	10.296	Full match	No results	No results	10488.7	13770.8	5075.1	7155.72	11793.6	9659.89	2873.26	2467.62	2551.23	2801.59	2600.04	2711.46	3.62031	1.85611	0.000339053	1	1.62568
Com_1212_pos	N-tert-Butyl-.alpha.-phenylnitrone	C11 H15 N O	177.115	15.403	Full match	No results	No results	5572	7423.92	7481.1	5244.4	4613.54	7881.62	6259.76	9828.6	6440.94	7791.38	11837.3	7663.14	0.767076	-0.382558	0.0861433	0.777778	0.352051
Com_1214_pos	N-tert-Butoxycarbonyl-DL-alanine	C8 H15 N O4	189.101	5.733	Full match	No results	No results	2627.77	2155.42	2269.36	2205.49	2142.38	2447.79	7387.76	7406.31	5789.11	5249.51	9686.46	5971.8	0.333765	-1.5831	2.25062e-05	1	1.42441
Com_1216_pos	N-Succinyl Lysine	C10 H18 N2 O5	246.122	8.486	Full match	No results	No results	7165.62	6644.99	7933.06	8288.05	6974.22	7208.08	8479.49	7766.23	8395.39	8869.62	7751.9	6305.61	0.929486	-0.105495	0.272647	0.722222	0.092696
Com_1218_pos	N-Propyl-4'-(trifluoromethyl)-2-biphenylcarboxamide	C17 H16 F3 N O	307.119	1.48	Full match	Invalid mass	No results	6113.83	7154.44	6628.05	16335.1	6200.19	7299.55	14168.9	5760.68	14158.1	6166.7	31709.7	6206.03	0.636191	-0.652468	0.353337	0.527778	0.461405
Com_1220_pos	n-Propyl GalIate	C10 H12 O5	212.068	5.88	Full match	No results	No results	167109	48909	62902.8	79098.8	103866	116166	181006	94141.1	96450	181541	74404.3	51960.6	0.850698	-0.233281	0.611196	0.583333	0.187962
Com_1223_pos	N-Phenyl-L-glutamine	C11 H14 N2 O3	222.1	6.411	Full match	No results	No results	212782	236909	196583	261415	179059	196987	35350.9	30720.2	28100.6	29292.7	50960.3	26365.3	6.39342	2.67659	1.80212e-07	1	2.46181
Com_1225_pos	NPC	C28 H30 N4 O6	518.218	12.038	Full match	No results	No results	37074.7	45444.5	30815.2	32599.5	34843.2	38968	25577.9	28520.3	20591.5	14849.6	35441.6	26341.6	1.45216	0.538204	0.0205113	0.916667	0.535292
Com_1226_pos	nostopeptolide A2	C52 H78 N10 O14	1066.57	14.049	Full match	No results	No results	11244	16179.4	13549.5	20130.2	7232.89	24527.5	4342.92	4297.98	4435.17	4297.72	4343.08	4903.6	3.48842	1.80257	0.00110435	1	1.54588
Com_1229_pos	nostocyclamide	C20 H22 N6 O4 S2	474.115	7.842	Full match	No results	No results	10116	12514.8	11309.2	15579.8	11975.9	12711	14328.6	11703.4	10499.5	8085.25	8035.34	10832.8	1.16888	0.225133	0.156792	0.75	0.222597
Com_1230_pos	nortrachelogenin	C20 H22 O7	374.136	8.164	Full match	No results	No results	9742.94	10097.9	8696.86	10818.7	9934.48	11107.8	11514.1	10357.5	9232.39	7782.82	5972.66	6768.45	1.16988	0.226366	0.149059	0.694444	0.239914
Com_1233_pos	Norgestrel	C21 H28 O2	312.208	13.106	Partial match	Full match	No results	1.27234e+07	1.13623e+07	1.25067e+07	1.20657e+07	1.20812e+07	1.24342e+07	1.14105e+07	1.22309e+07	1.12887e+07	1.06861e+07	1.05828e+07	1.1408e+07	1.08234	0.114147	0.0154859	0.861111	0.104787
Com_1236_pos	norfenefrine	C8 H11 N O2	153.079	1.574	Full match	Invalid mass	No results	5.01914e+06	409685	5.27742e+06	8.2102e+06	3.27169e+06	5.2694e+06	3.82029e+06	3.23589e+06	5.53169e+06	3.09947e+06	4.95103e+06	3.9109e+06	1.11847	0.161522	0.72917	0.638889	0.225769
Com_1237_pos	Norethisterone acetate	C22 H28 O3	340.203	13.213	Full match	No results	No results	639836	458566	505731	505776	637266	464183	516293	479083	495222	488447	548880	548979	1.0437	0.0617035	0.615467	0.5	0.0478829
Com_1241_pos	Norethindrone	C20 H26 O2	298.193	0.563	Full match	No results	No results	12504.8	6994.59	10502.5	13219.5	13215.9	15274.3	36876.9	13339.8	17674.2	16202.9	15905.8	11283.3	0.644408	-0.633954	0.0861958	0.861111	0.51108
Com_1243_pos	Norcapillene	C11 H8	140.062	13.091	Full match	Invalid mass	No results	1.05816e+07	8.12779e+06	1.08312e+07	1.09291e+07	1.01909e+07	1.10251e+07	1.05835e+07	1.06401e+07	1.03484e+07	9.93706e+06	1.04788e+07	9.63709e+06	1.00099	0.00142178	0.943727	0.666667	0.0109553
Com_1245_pos	noradrenaline	C8 H11 N O3	169.074	1.33	Full match	No results	No results	580783	546789	586318	633359	513116	701633	350894	482739	454189	320803	509720	430032	1.39775	0.483108	0.00416455	1	0.454129
Com_1247_pos	nopol	C11 H18 O	166.136	11.184	Full match	Invalid mass	No results	368784	336174	424579	547354	381221	539270	396297	348490	358783	311930	290173	293673	1.29912	0.37753	0.0321277	0.861111	0.329842
Com_1248_pos	NOP	C13 H12 O3	216.078	9.07	Full match	No results	No results	186603	137225	193492	202440	223394	194358	289900	195174	210556	390150	155389	184056	0.798128	-0.325308	0.263114	0.638889	0.260927
Com_1251_pos	Nootkatone	C15 H22 O	218.167	10.882	Partial match	Full match	No results	810380	613513	999273	584027	761556	667374	772458	690508	716229	684514	422525	552158	1.15572	0.208797	0.257451	0.638889	0.225987
Com_1253_pos	Nonivamide	C17 H27 N O3	293.198	9.192	Full match	No results	No results	11935.2	11935.5	6153.15	11124.7	7428.86	16201	6843.48	56575.3	6379.51	7242.52	6032.61	5436.48	0.731877	-0.450327	0.778468	0.75	0.226235
Com_1254_pos	Nonanoic acid	C9 H18 O2	158.13	9.754	Full match	No results	No results	282608	386884	267106	279051	418403	224432	208299	122314	322618	238201	241050	217351	1.37683	0.461346	0.0680494	0.833333	0.445416
Com_1255_pos	Nonactin	C40 H64 O12	736.436	14.594	Full match	No results	No results	1.23218e+06	1.46312e+06	1.16152e+06	1.86193e+06	1.45305e+06	1.3093e+06	1.96178e+06	3.38118e+06	2.04923e+06	2.67417e+06	2.93607e+06	4.14649e+06	0.494556	-1.0158	0.00104371	1	0.900387
Com_1257_pos	nogalamycin	C39 H49 N O16	787.309	14.095	Full match	No results	No results	74380.3	87165.1	126137	131642	109602	62973.5	59913.5	77859.2	74333.2	58696.1	34348.3	108268	1.43172	0.51775	0.085476	0.833333	0.52311
Com_1259_pos	Nodakenin	C20 H24 O9	408.141	6.252	Full match	No results	No results	33673.3	24190.8	32599.8	25221.1	33239.2	33419.6	22288.2	21274.3	27749.6	28259.3	19190.1	18995.4	1.32366	0.404536	0.0139726	0.888889	0.379555
Com_1262_pos	Nobiletin	C21 H22 O8	402.13	7.401	Full match	No results	No results	69668.9	69628.9	76502.3	84732.9	74732.7	99481.6	82558.8	66726.6	87626	75511.7	52123	56171.5	1.12842	0.174308	0.234245	0.666667	0.183935
Com_1263_pos	nobilamide C	C38 H54 N6 O9	738.393	11.968	Full match	No results	No results	7055.53	15889	20472	27001.4	7766.74	29707.1	6564.66	6400.75	7174.45	6287.55	6271.86	6148.26	2.77731	1.47369	0.0173047	0.972222	1.15701
Com_1264_pos	N-Nitrosoguvacoline	C7 H10 N2 O3	170.069	1.325	Full match	No results	No results	202367	186654	190211	179140	195305	218239	148936	157817	215173	162165	127408	189541	1.1707	0.227371	0.075922	0.805556	0.2317
Com_1266_pos	N-Methylvalyl-N-[2-(1H-indol-3-yl)ethyl]-Nalpha-methylphenylalaninamide	C26 H34 N4 O2	434.266	11.525	Full match	No results	No results	144881	117072	167683	105205	98340.4	94750.3	104749	100588	90270.1	47255.4	40272.9	61256	1.63805	0.711975	0.023243	0.888889	0.716574
Com_126_pos	UV Absorber-4	C14 H20 O	204.151	7.88	Full match	No results	No results	31947.1	22419.5	32027.2	30645.4	40286.8	36538.7	34695.2	27675	31556.5	43347	30147.5	29595.1	0.984004	-0.0232643	0.846813	0.583333	0.0458669
Com_1271_pos	N-Methyl-L-valyl-N-[(3R,5S)-1-{(2S)-2-[(1R,2R)-3-{[(1S,2R)-1-hydroxy-1-phenyl-2-propanyl]amino}-1-methoxy-2-methyl-3-oxopropyl]-1-pyrrolidinyl}-3-methoxy-5-methyl-1-oxo-4-heptanyl]-N-methyl-L-valinamide	C39 H67 N5 O7	717.503	13.173	Full match	No results	No results	1.7999e+06	1.2638e+06	1.49179e+06	1.06579e+06	1.46089e+06	1.04166e+06	2.50165e+06	1.68892e+06	1.93e+06	2.00103e+06	2.19064e+06	2.37322e+06	0.640405	-0.642943	0.00193672	0.972222	0.599072
Com_1272_pos	N-Methylcaprolactam	C7 H13 N O	127.099	1.315	Partial match	Full match	No results	8.32107e+06	7.32113e+06	522517	3.16467e+06	4.58575e+06	1.32524e+06	2.10491e+06	2.11232e+06	765894	2.98456e+06	806432	847055	2.62342	1.39145	0.175898	0.75	0.984829
Com_1274_pos	nivazol	C28 H31 F N2 O	430.242	7.495	Full match	No results	No results	165201	146589	147569	163380	134780	120903	30557.7	30254	20885.8	14343.9	45123.2	14039.2	5.65979	2.50075	0.000126042	1	2.3892
Com_1275_pos	Nitroarginine	C6 H13 N5 O4	219.097	9.444	Full match	No results	No results	57649.8	40846.7	49284	34872.6	44931.7	28623.2	31280.7	18347	18235.4	16558.6	14554.3	18755.4	2.17621	1.12182	0.000346686	0.972222	1.0344
Com_1277_pos	Nitrendipine	C18 H20 N2 O6	360.131	5.818	Full match	Invalid mass	No results	258839	287760	265605	292612	260467	261406	492675	279242	363938	395666	268988	268417	0.786248	-0.346943	0.0904534	0.833333	0.287863
Com_1278_pos	Nisoldipine	C20 H24 N2 O6	388.163	9.723	Full match	Invalid mass	No results	34562	22808.6	63643.5	168412	38218.6	44683.8	81288.4	17725.9	20953.6	22409.6	15667.4	20303	2.08765	1.06188	0.0903885	0.861111	0.928369
Com_1279_pos	Nipradilol	C15 H22 N2 O6	326.149	8.75	Full match	No results	No results	3894.73	3187.88	3352.59	3363.89	3402.49	3713.37	5227.67	3474.67	3551.47	3697.1	3801.81	3535.45	0.898093	-0.155063	0.199128	0.75	0.130294
Com_127_pos	usambarensine	C29 H28 N4	432.233	11.511	Full match	Invalid mass	No results	203571	205090	225653	193888	187502	172258	139102	110747	218366	118349	144329	225237	1.24247	0.313209	0.0988976	0.722222	0.3386
Com_1280_pos	Nipecotic acid	C6 H11 N O2	129.079	1.913	Full match	Invalid mass	No results	505671	451929	514576	352056	449341	451019	368884	467529	294400	499888	280506	330928	1.21518	0.281167	0.0961734	0.75	0.284016
Com_1281_pos	ningalin B	C25 H19 N O8	461.111	8.389	Full match	Invalid mass	No results	55986.8	13294.3	9758.25	71302.2	4176.48	51669.7	45908.6	13281	8202.71	28755.3	21346.4	27445.9	1.42257	0.508504	0.93195	0.583333	0.225204
Com_1283_pos	Nilestriol	C25 H32 O3	380.234	12.951	Full match	No results	No results	859311	720202	896360	771092	803791	949236	897763	383970	792396	702070	785369	522921	1.22414	0.29177	0.133839	0.75	0.313615
Com_1287_pos	Nigakilactone E	C24 H34 O8	450.225	12.473	Full match	Invalid mass	No results	13445.4	13655	14757.1	14731.4	15082.6	14099.3	18511.2	27345.7	21584.1	15020.6	18454.3	21805.1	0.698909	-0.516823	0.00817878	0.972222	0.45008
Com_1292_pos	Nifedipine	C17 H18 N2 O6	346.116	8.436	Full match	No results	No results	50389.2	43436.5	54826.3	45681.9	53846.8	66387.5	52381.7	34135.2	44420.8	50318.9	41295.9	31722.2	1.23712	0.306985	0.0613092	0.833333	0.292573
Com_1294_pos	Nicotinoyl azide	C6 H4 N4 O	148.038	1.546	Full match	Invalid mass	No results	16898.9	21845.5	20893.8	13263.7	15810.9	17864.8	18192.7	11858.1	13392	16191.4	15552.8	16516.1	1.1622	0.216864	0.168972	0.722222	0.198839
Com_1297_pos	Nicotinic acid	C6 H5 N O2	123.032	1.331	Full match	Full match	Full match	1.07222e+07	1.01231e+07	9.1189e+06	1.09538e+07	8.84718e+06	7.99266e+06	4.52547e+06	3.66299e+06	4.27771e+06	3.24183e+06	6.20058e+06	4.70506e+06	2.17023	1.11785	7.46132e-05	1	1.0388
Com_1299_pos	Nicotinamide ribotide	C11 H15 N2 O8 P	334.056	1.309	Full match	Invalid mass	No results	136432	189052	187119	153703	182471	193359	142881	76179.9	220670	321034	205660	157409	0.927304	-0.108886	0.970889	0.416667	0.0864514
Com_129_pos	urobilinogen	C33 H44 N4 O6	592.324	0.588	Full match	No results	No results	34433.7	32469.8	33333.2	55135.7	52964.7	39761.5	78822.1	62144.9	48870.2	71430.1	85456.9	43182.4	0.636303	-0.652215	0.0126656	0.888889	0.594641
Com_1301_pos	nicotianamine	C12 H21 N3 O6	303.142	1.177	Full match	No results	No results	141563	136989	155457	169820	154606	138990	76840.2	158020	94400.6	109869	259894	137225	1.07315	0.101857	0.439876	0.666667	0.252568
Com_1302_pos	Nicomol	C34 H32 N4 O9	640.215	11.015	Full match	No results	No results	33664.6	26670.5	26521.5	27646.2	20726.6	22175.7	39260.3	38124.7	26355.6	36356.4	25038.5	30283.4	0.805475	-0.312089	0.0726866	0.75	0.280253
Com_1303_pos	Niceritrol	C29 H24 N4 O8	556.16	10.894	Full match	No results	No results	8304.54	6957.35	7785.18	6751.54	7277.76	8915.72	8530.45	8641.14	11805.9	9740.72	7824.58	8078.83	0.842012	-0.248087	0.0558983	0.833333	0.221577
Com_1304_pos	N'-Hydroxy-4-pentylbenzenecarboximidamide	C12 H18 N2 O	206.142	6.538	Partial match	Full match	No results	3.44245e+06	3.20911e+06	3.46726e+06	2.99685e+06	3.20861e+06	3.59028e+06	3.51887e+06	2.54655e+06	3.37538e+06	2.43712e+06	1.88552e+06	2.11451e+06	1.25423	0.326799	0.0566736	0.777778	0.339993
Com_1305_pos	N-Hydroxy-2-(2-hydroxyphenyl)-N-[2-(1H-imidazol-5-yl)ethyl]-3-methyl-1,3-oxazolidine-4-carboxamide	C16 H20 N4 O4	332.148	7.018	Full match	No results	No results	89621.9	92438.9	92754.1	64733.8	63630.9	77913.9	21935.4	14782.3	9245.85	15177.4	48649.9	10002.8	4.01601	2.00576	0.00107379	1	2.04484
Com_1306_pos	n-Hexanamide	C6 H13 N O	115.1	1.323	Full match	Invalid mass	No results	51003.7	55021	108145	64304.5	53950	60070.9	43102	80060.4	50196.8	50144.1	66576.1	83193.9	1.05149	0.0724396	0.779772	0.416667	0.0599555
Com_1309_pos	nhatrangin A	C21 H32 O8	412.208	10.435	Full match	No results	No results	127957	103373	164732	148300	126022	130898	43991.5	46284.5	53703.4	53474.9	56091.6	54442.4	2.60167	1.37944	1.05159e-06	1	1.24903
Com_1313_pos	N-Feruloylserotonin	C20 H20 N2 O4	352.141	9.203	Full match	No results	No results	162209	65214.2	67376.3	49226.8	76377	57409.3	38025.2	62450.2	51588.7	110044	63121	27079	1.35624	0.439608	0.251677	0.722222	0.417272
Com_1315_pos	N-feruloylglycine	C12 H13 N O5	251.079	8.699	Full match	Invalid mass	No results	779884	289102	539282	322681	286699	281469	246962	256343	180523	543168	196153	139790	1.59899	0.677158	0.0883191	0.861111	0.643908
Com_1317_pos	N-Ethylaniline	C8 H11 N	121.089	8.12	Full match	Invalid mass	No results	15091.1	12295.3	130555	16957.9	15604.9	13154.4	153366	149631	20694.9	89982.1	12129.4	13745.5	0.463336	-1.10987	0.256815	0.666667	1.02129
Com_1319_pos	Neostigmine	C12 H19 N2 O2	223.145	13.512	Full match	Invalid mass	No results	3.73924e+06	4.47091e+06	4.5499e+06	5.34253e+06	4.06329e+06	3.94214e+06	955115	859863	737217	765270	1.79417e+06	1.18177e+06	4.14847	2.05258	3.64345e-05	1	1.92781
Com_131_pos	Uric acid	C5 H4 N4 O3	168.028	1.373	Full match	Full match	No results	862091	1.93173e+06	1.79199e+06	4.21012e+06	2.07068e+06	2.55406e+06	714149	2.08291e+06	1.6292e+06	1.63807e+06	8.21851e+06	4.90295e+06	0.699511	-0.515582	0.732577	0.5	0.333015
Com_1322_pos	Neosolaniol	C19 H26 O8	364.151	10.548	No match	Invalid mass	No results	1.34762e+06	1.48001e+06	918593	1.04968e+06	900083	741141	1.50241e+06	4.15602e+06	2.15057e+06	904620	1.12373e+06	1.57451e+06	0.564073	-0.826046	0.094105	0.833333	0.619567
Com_1323_pos	neomarinone	C26 H32 O5	424.224	10.677	Full match	Invalid mass	No results	21960.8	16400.3	23840.4	17708.7	16030.9	17634	25295.8	20525.1	19416	21585.5	20725.1	21607.2	0.879371	-0.185455	0.110738	0.722222	0.180083
Com_1324_pos	Neoisostegane	C23 H26 O7	414.167	8.287	Full match	No results	No results	160226	112288	106520	114383	147649	102599	99843.1	99654.9	159038	107641	55259.2	65530.1	1.26697	0.341378	0.144327	0.805556	0.384343
Com_1325_pos	Neoandrographolide	C26 H40 O8	497.298	12.422	No results	Invalid mass	No results	4.71392e+06	2.52683e+06	3.56995e+06	1.86858e+06	3.21313e+06	2.48936e+06	2.10721e+06	3.14297e+06	1.025e+06	1.38102e+06	4.32229e+06	1.38309e+06	1.37572	0.460186	0.159074	0.75	0.561859
Com_1326_pos	Nelarabine	C11 H15 N5 O5	297.106	1.33	Full match	No results	No results	59318.3	55466.7	61681.9	69021.6	54880.4	60822.8	71239.6	38286.5	58392.1	60234.3	41497.8	54404.7	1.1146	0.156526	0.255139	0.694444	0.186815
Com_1329_pos	N-DesmethylZolmitriptan	C15 H19 N3 O2	273.147	6.411	Full match	No results	No results	38977.4	36841.5	34812.7	44641.7	33425.9	38514.9	10118.3	8350.38	5208.01	9182.92	12611.6	6593.77	4.36405	2.12567	2.94706e-05	1	1.98347
Com_132_pos	Urdamycin B	C37 H44 O13	696.276	11.037	Full match	No results	No results	46713	18828.1	58363.3	202392	33385.8	41737.5	160663	13583.2	92846.7	54333.9	9177.94	9343.75	1.18083	0.239796	0.471976	0.611111	0.682289
Com_1331_pos	N-Cyclopentyl-4-({2,4-dioxo-1-[(4-oxo-4H-pyrido[1,2-a]pyrimidin-2-yl)methyl]-1,4-dihydro-3(2H)-quinazolinyl}methyl)benzamide	C30 H27 N5 O4	521.205	8.735	Full match	No results	No results	101910	61692.6	84724.5	69819.9	84953.9	77730.8	87252.1	94925.5	73716.4	84373.5	65341	78781.4	0.992654	-0.0106375	0.889153	0.527778	0.0278566
Com_1332_pos	N-Cyclohexyl-6-methyl-5-(4-phenyl-1,3-thiazol-2-yl)-2-(trifluoromethyl)nicotinamide	C23 H22 F3 N3 O S	445.142	11.521	Full match	No results	No results	14188.2	12557.6	15633.6	13085.9	12772	13968.3	13943.4	14160	12723.6	13013.2	11885.6	11559.3	1.06367	0.0890471	0.221809	0.722222	0.0835359
Com_1333_pos	N-Cyclohexyl-1-[4-(trifluoromethyl)-2-pyrimidinyl]-4-piperidinecarboxamide	C17 H23 F3 N4 O	356.182	11.971	Full match	No results	No results	374686	211667	234725	149968	613765	127210	132774	25846.4	33431.2	56702	142614	92593.6	3.53751	1.82274	0.00648273	0.944444	1.71687
Com_1334_pos	N-COUMAROYL SEROTONIN	C19 H18 N2 O3	322.131	9.091	Full match	Invalid mass	No results	116242	77997.9	114735	138859	79346.3	71150.1	117832	131087	108086	97873.9	135867	111799	0.851662	-0.231647	0.173531	0.666667	0.251748
Com_1337_pos	N-Caffeoylputrescine	C13 H18 N2 O3	250.131	5.64	Full match	Invalid mass	No results	1.47586e+06	4.86222e+06	1.52841e+07	9.65383e+06	7.71629e+06	5.20866e+06	7.26502e+07	6.37858e+07	7.5959e+07	1.24528e+08	7.31064e+07	8.59054e+07	0.0891266	-3.488	0.000287148	1	3.43584
Com_1338_pos	N-Butyrylhomoserine	C8 H15 N O4	189.1	6.509	Full match	Invalid mass	No results	17490.1	19745.4	22153.8	22926.3	9793.64	27756.2	12257.3	18906.5	22954.6	16297.1	11075.1	13460.7	1.26239	0.336154	0.270003	0.694444	0.291008
Com_1339_pos	N-Butyl-N-ethyl-2,4,6-triisopropylbenzenecarbothioamide	C22 H37 N S	347.266	9.74	Full match	No results	No results	852105	719557	681058	466173	495428	553737	565417	451085	539117	544571	493504	608823	1.17659	0.234615	0.213143	0.694444	0.193448
Com_1344_pos	N-Benzylformamide	C8 H9 N O	135.068	1.324	Partial match	Full match	No results	319000	292474	269861	318987	298937	330313	265415	582947	248480	193436	380345	349765	0.905554	-0.143127	0.827241	0.5	0.139801
Com_1346_pos	N-Benzyl-4-piperidone	C12 H15 N O	189.115	6.536	Partial match	Full match	No results	4.13254e+06	3.8698e+06	4.17624e+06	3.60376e+06	3.88259e+06	4.30486e+06	4.19842e+06	3.07078e+06	4.04644e+06	2.92023e+06	2.25484e+06	2.53899e+06	1.2596	0.332966	0.0531945	0.777778	0.345386
Com_1347_pos	N-Benzyl-4-[3-(dibenzylamino)propoxy]-N-[(6-methoxy-3-pyridinyl)methyl]-3-methyl-1-butanamine	C36 H45 N3 O2	551.354	13.917	Full match	No results	No results	50384.6	34829.7	57094.6	68788.4	55833.9	83433.7	20477.3	66753.2	81762.7	68276	40146	57242.7	1.04693	0.0661713	0.684915	0.5	0.135722
Com_1348_pos	navenone B	C16 H16 O	224.12	13.08	Full match	Invalid mass	No results	2.14601e+06	1.91402e+06	1.77091e+06	1.91865e+06	1.73776e+06	2.00838e+06	1.89613e+06	1.82796e+06	2.07781e+06	1.8717e+06	1.73679e+06	1.83249e+06	1.02249	0.0320876	0.610795	0.638889	0.0281089
Com_1349_pos	Naveglitazar	C25 H26 O6	422.171	8.101	Full match	No results	No results	132440	101855	133521	139389	98487.2	126204	78434.9	102590	69439.3	55300.9	80798.6	117668	1.45151	0.53755	0.014635	0.888889	0.518325
Com_134_pos	Urate D-ribonucleotide	C10 H13 N4 O10 P	380.038	1.183	Full match	No results	No results	347720	417816	369968	492780	501849	515095	281473	330138	269419	314810	335067	713822	1.17842	0.23685	0.224302	0.833333	0.282531
Com_1350_pos	Natamycin	C33 H47 N O13	665.308	10.635	Full match	No results	No results	229010	165011	137001	175539	179282	242178	54957.5	165208	171360	129764	109600	92706.2	1.55891	0.640535	0.0366179	0.888889	0.648626
Com_1351_pos	Narirutin	C27 H32 O14	580.178	8.926	Full match	Invalid mass	No results	367161	459870	409838	384857	575341	561381	789227	659410	595877	682283	493695	681164	0.706994	-0.500229	0.0063638	0.944444	0.464682
Com_1353_pos	Naringenin	C15 H12 O5	272.068	9.079	Partial match	Full match	Not the top hit	6.19005e+06	6.06308e+06	8.92349e+06	9.84388e+06	7.86894e+06	8.52062e+06	2.81357e+06	2.24731e+06	1.3079e+06	918662	1.98877e+06	1.66309e+06	4.33392	2.11567	5.69823e-05	1	1.98916
Com_1354_pos	Narceine	C23 H27 N O8	445.173	8.596	Full match	Invalid mass	No results	2.9552e+07	1.38764e+07	1.20336e+07	8.65497e+06	1.79696e+07	1.05569e+07	8.46936e+06	2.35427e+07	1.13858e+07	7.58194e+06	2.06154e+07	1.97803e+07	1.01388	0.0198805	0.930816	0.472222	0.169094
Com_1355_pos	Napyradiomycin A1	C25 H30 Cl2 O5	480.146	11.871	Full match	No results	No results	2851.61	2830.92	2395.71	2167.76	2157.29	2261.42	3355.2	3187.69	7107.98	15405.5	3830.78	6592.63	0.371449	-1.42877	0.0193094	1	1.09532
Com_1356_pos	Naproxen	C14 H14 O3	230.094	7.759	Full match	No results	No results	17771.1	13275.9	18612.6	16241.2	13434.6	19983.7	21613.2	17458.2	15726.4	18114.3	15304.3	21768.6	0.903024	-0.147163	0.289513	0.638889	0.139393
Com_1360_pos	Naphthalene	C10 H8	128.062	11.534	Full match	Invalid mass	No results	302594	264014	400217	270421	286907	299569	330644	300677	274396	299904	261812	270717	1.04923	0.069333	0.574766	0.527778	0.0719511
Com_1361_pos	Nandrolone cyclotate	C28 H38 O3	422.281	12.557	Full match	No results	No results	151264	128714	153422	197954	134733	139766	81218.8	163752	97875.2	59698.3	158042	88369.7	1.39586	0.481157	0.0624155	0.722222	0.528381
Com_1362_pos	Nalpha-[(3,5-Difluorophenyl)acetyl]-N-[1-(dihydroxyboryl)-3-(methylsulfanyl)propyl]tryptophanamide	C23 H26 B F2 N3 O4 S	489.169	1.196	Full match	No results	No results	52220.4	33966.5	35056.1	90459.7	30793.6	41706.9	112746	146902	123261	125612	191654	192694	0.318303	-1.65153	0.000218461	1	1.58317
Com_1364_pos	N-Allyl-N-benzylacrylamide	C13 H15 N O	201.115	8.26	Full match	Invalid mass	No results	2.20266e+06	2.91517e+06	3.77189e+06	4.42452e+06	3.8566e+06	3.00297e+06	1.79081e+06	2.63189e+06	2.76699e+06	2.95979e+06	3.35284e+06	5.16921e+06	1.08046	0.111643	0.569228	0.638889	0.135514
Com_1366_pos	N-Allyl-4-methyl-N-[(1-methyl-3-oxocyclobutyl)methyl]benzenesulfonamide	C16 H21 N O3 S	307.123	7.623	Full match	No results	No results	143579	113161	79178.3	81115.8	119217	72409.2	87326.5	56603	55850.2	153699	47300	52528.5	1.34271	0.425146	0.132084	0.75	0.480621
Com_1368_pos	Nadifloxacin	C19 H21 F N2 O4	360.15	11.16	Full match	No results	No results	2418.98	4363.24	7261.68	9414.33	7386.83	5629.13	3309.08	6987.27	2630.76	2459.86	8061.06	3968.07	1.33039	0.411853	0.307388	0.666667	0.426737
Com_1369_pos	NADH(2-)	C21 H27 N7 O14 P2	663.108	1.325	Full match	No results	No results	337059	350368	412737	553765	414362	623457	960915	818425	891407	698951	1.18625e+06	1.28426e+06	0.4609	-1.11747	0.000210403	1	1.02715
Com_136_pos	Uracil	C4 H4 N2 O2	112.027	1.514	Full match	Full match	No results	6.83812e+06	9.3653e+06	6.82444e+06	8.43684e+06	6.79202e+06	6.40723e+06	1.62944e+06	2.57173e+06	1.96426e+06	2.00908e+06	3.41635e+06	2.774e+06	3.10925	1.63657	1.89699e-05	1	1.51903
Com_1370_pos	N-Acetyltyramine	C10 H13 N O2	179.094	6.191	Partial match	Full match	No results	295486	242697	221925	199292	271993	235669	120006	268260	119173	167483	359189	327900	1.07713	0.107193	0.464559	0.555556	0.266673
Com_1372_pos	N-Acetylnorvaline	C7 H13 N O3	159.089	1.419	Full match	Invalid mass	No results	724468	776600	799565	775728	785852	832760	699497	709887	712104	1.03102e+06	602571	697724	1.05439	0.0764023	0.415512	0.833333	0.103551
Com_1374_pos	N-Acetyl-L-phenylalanine	C11 H13 N O3	207.089	7.591	Full match	Invalid mass	No results	111417	45514.8	53816.3	33178.2	58373.4	55881	40599.5	31820.2	36119.4	36807.6	28347.4	30144.1	1.75718	0.813265	0.0261606	0.916667	0.659372
Com_1375_pos	N-Acetyl-L-leucine	C8 H15 N O3	173.105	1.329	Full match	Full match	No results	6.91038e+06	2.22676e+06	1.82446e+06	1.28251e+06	3.90144e+06	2.91697e+06	1.80113e+06	2.66764e+06	3.98782e+06	1.75212e+06	938088	3.27312e+06	1.32196	0.402677	0.493265	0.611111	0.322782
Com_1379_pos	N-Acetyl-L-glutamic acid	C7 H11 N O5	189.063	1.795	Full match	No results	No results	103234	130327	156542	271026	129948	102797	186361	103520	287067	114977	271931	130142	0.817072	-0.291465	0.455874	0.666667	0.24202
Com_137_pos	unnarmicin C	C38 H54 N4 O6	662.402	14.397	Full match	Invalid mass	No results	2.11595e+06	2.21566e+06	3.40467e+06	2.46171e+06	2.64e+06	2.58872e+06	3.35419e+06	5.33416e+06	7.50498e+06	5.54502e+06	5.30281e+06	6.83124e+06	0.455436	-1.13468	0.000382376	0.972222	1.00981
Com_1380_pos	N-acetylleukotriene E4	C25 H39 N O6 S	481.252	9.173	Full match	No results	No results	223101	211220	152401	222819	193801	298453	12806.1	15212.6	14093.8	12541	18320	19848.2	14.0247	3.8099	9.91829e-10	1	3.46404
Com_1384_pos	N-Acetylleucylleucylleucylleucyltyrosinamide	C35 H58 N6 O7	674.436	14.826	Full match	No results	No results	11741.8	9183.41	11919.9	12895.6	9139.31	7688.93	53370.1	11751.5	14372.6	9193.17	9670.76	9429.39	0.580483	-0.784673	0.322098	0.694444	0.415422
Com_1385_pos	N-Acetylleucylleucine	C14 H26 N2 O4	286.188	10.265	Full match	Invalid mass	No results	195726	142256	128279	131468	97058.6	140817	34704	30330.7	33186.3	32489.8	36925.6	31200.9	4.20246	2.07123	6.30533e-06	1	1.86143
Com_1388_pos	N-acetyl-L-2-aminoadipic acid	C8 H13 N O5	203.079	1.188	Full match	No results	No results	63919.5	21407	30407.2	45903.4	33342.8	26076	37266.5	30238.5	54305.6	47017.7	42298.5	40511.5	0.878467	-0.18694	0.348552	0.666667	0.239912
Com_1390_pos	N-Acetyl-b-D-glucosamine	C8 H15 N O6	221.09	7.959	Full match	No results	No results	144910	241121	187779	217974	302626	216428	101144	102715	268432	80683.5	145770	194477	1.46754	0.553401	0.0680851	0.777778	0.590388
Com_1392_pos	N-Acetylanthranilic acid	C9 H9 N O3	179.058	7.428	Full match	Invalid mass	No results	304611	649595	526715	622473	536917	472685	340230	763594	561699	218815	390247	375623	1.17462	0.232197	0.341403	0.638889	0.276264
Com_1393_pos	N6-Acetyl-L-lysine	C8 H16 N2 O3	188.116	1.371	Full match	Full match	No results	650934	622301	521871	776398	672558	698897	543270	375347	383676	424483	423575	192095	1.68327	0.751263	0.00958286	0.972222	0.734396
Com_1394_pos	N6,N6,N6-Trimethyl-L-lysine	C9 H20 N2 O2	188.152	1.117	Full match	Full match	No results	3.41327e+06	1.2506e+07	7.94707e+06	1.07601e+07	8.61075e+06	5.69899e+06	4.66175e+06	8.89679e+06	5.52399e+06	4.77185e+06	1.03239e+07	1.07302e+07	1.08969	0.123915	0.799271	0.583333	0.112286
Com_1395_pos	N6-(PYRIDOXAL PHOSPHATE)LYSINE	C14 H22 N3 O7 P	375.118	11.904	Full match	No results	No results	109352	31068.1	89216.6	52883.4	49167.6	35215.9	84819.2	55646	66901.5	48451.2	97420.4	51632.9	0.906224	-0.142061	0.488739	0.611111	0.230423
Com_1396_pos	N4-(beta-N-Acetyl-D-glucosaminyl)-L-asparagine	C12 H21 N3 O8	335.132	1.186	Full match	No results	No results	23998.1	22696.9	28228.4	33690.3	22504.2	25851.2	29777	31560.3	35120.2	30108.1	35886.9	39858.8	0.775879	-0.366096	0.00910656	0.916667	0.340656
Com_1397_pos	N-3-oxo-dodecanoyl-L-Homoserine lactone	C16 H27 N O4	297.193	8.319	Full match	No results	No results	14528.9	6794.61	7058.34	7147.14	7234.39	7776.72	8843.85	7714.98	7953.34	7550.48	7014.59	7145.63	1.0934	0.128822	0.68968	0.583333	0.0705822
Com_1398_pos	N2-Succinyl-L-glutamic acid 5-semialdehyde	C9 H13 N O6	231.074	1.332	Full match	No results	No results	459416	664273	529442	640114	469662	595580	517760	500023	878026	466569	296041	454732	1.07881	0.109435	0.474944	0.694444	0.190516
Com_13_pos	ZR BQ DVO1	C8 H9 N O3	167.058	6.572	Full match	No results	No results	45751	72084.1	59885.9	80754	73446.2	70454.2	51081.6	81359	76225.8	46962.2	53389.1	63960.4	1.07882	0.109451	0.528737	0.555556	0.106298
Com_1403_pos	N~6~-Acryloyl-N~2~-[(benzyloxy)carbonyl]lysine	C17 H22 N2 O5	334.154	11.961	Full match	No results	No results	70109.6	92709.3	111056	87883.7	78916.3	125664	202088	174697	182384	215824	194606	166409	0.498534	-1.00423	0.000158815	1	0.93525
Com_1404_pos	N~6~-{[(2-Methyl-2-cyclopropen-1-yl)methoxy]carbonyl}lysine	C12 H20 N2 O4	256.142	8.399	Full match	No results	No results	77784.8	91611	99594.2	115685	85822	95166.7	120061	113138	107653	104352	148755	163352	0.746939	-0.420938	0.0131471	0.916667	0.377269
Com_1405_pos	N~6~-[(Allyloxy)carbonyl]lysine	C10 H18 N2 O4	230.128	10.294	Full match	No results	No results	15897	12731.2	13653.2	13324.4	12851.3	14351.5	17468.6	41741.8	26009.4	17023	15362.5	16474.3	0.617608	-0.695236	0.0466792	0.972222	0.545534
Com_1407_pos	N~6~-[(2R)-3,4-Dihydro-2H-pyrrol-2-ylcarbonyl]-L-lysine	C11 H19 N3 O3	241.142	5.589	Full match	No results	No results	85490.4	99272.6	104726	149386	113334	83369	11588.6	10658.5	11949	12415	23410.3	17290.5	7.2794	2.86382	3.31289e-07	1	2.63666
Com_1408_pos	N~6~-[(2-Propyn-1-yloxy)carbonyl]lysine	C10 H16 N2 O4	228.11	5.415	Full match	No results	No results	358314	373929	316769	448011	370187	304692	46433.8	44266.9	29608	41026.6	63225.4	40264.7	8.20126	3.03585	9.42932e-08	1	2.78796
Com_140_pos	Union carbide UC 21149	C7 H14 N2 O2 S	190.078	12.985	Full match	No results	No results	31391.3	51251.1	42725.6	33833.3	40160.1	52017.9	37680.1	32836.1	49592.1	40911.6	35748.2	37023.8	1.07523	0.104641	0.553536	0.611111	0.104573
Com_1411_pos	N~6~-(5-Oxo-D-isoleucyl)-L-lysine	C12 H23 N3 O4	273.168	6.838	Full match	No results	No results	126445	97558.4	84787.2	109091	94395.9	102665	25121.7	12122.9	12376	12682.2	21190	11316.4	6.48611	2.69735	6.80839e-06	1	2.51369
Com_1413_pos	N~4~-Benzyl-N~2~-(3-fluorophenyl)-2,4-quinazolinediamine	C21 H17 F N4	344.144	10.548	Full match	No results	No results	373584	354367	283319	303164	256515	55790.6	441415	979711	605848	311211	364840	455129	0.515092	-0.957098	0.0600391	0.916667	0.968642
Com_1415_pos	N~2~-Formyl-L-glutaminyl-N-[(2S,6S,9S,12S,16S,19E)-6-[(2S)-2-butanyl]-16-[(5-hydroxy-1H-indol-3-yl)methyl]-2-(methoxymethyl)-9-methyl-4,5,8,11,15,18-hexaoxo-23-thia-3,7,10,14,17,24-hexaazabicyclo[19.2.1]tetracosa-1(24),19,21-trien-12-yl]-L-isoleucinamide	C45 H61 N11 O12 S	979.426	11.537	Full match	No results	No results	7718.91	11170.4	7227.35	5811.39	6551.58	4584.92	3102.24	7165.73	4472.68	2263.13	2600.46	3111.25	1.89582	0.922824	0.0100784	0.916667	0.896487
Com_1417_pos	N~2~-Acetyl-N~6~-{5-[(3aS,4S,6aR)-2-oxohexahydro-1H-thieno[3,4-d]imidazol-4-yl]pentanoyl}-L-lysyl-N-[6-({(2S)-1-carboxy-4-[(2,6-dimethylbenzoyl)oxy]-3-oxo-2-butanyl}amino)-6-oxohexyl]-L-tyrosinamide	C47 H65 N7 O12 S	951.443	10.746	Full match	No results	No results	18777.1	18916.5	22392.9	20485.5	25113.9	19120.1	26103	24846.4	22763.6	21083.2	20430	22397.9	0.906861	-0.141046	0.134191	0.777778	0.133768
Com_1418_pos	N~2~-Acetyl-L-ornithine	C7 H14 N2 O3	174.1	1.323	Full match	No results	No results	264062	1.0032e+06	1.02047e+06	1.32858e+06	944494	1.11405e+06	738534	1.09467e+06	842455	367522	1.24215e+06	2.01974e+06	0.900047	-0.151928	0.805105	0.5	0.124132
Com_1419_pos	N~2~-{(2R)-2-[(1S)-1-Hydroxy-2-(hydroxyamino)-2-oxoethyl]-4-methylpentanoyl}-L-asparaginyl-4-benzoyl-L-phenylalanyl-N~6~-5-hexynoyllysinamide	C40 H53 N7 O10	791.386	11.689	Full match	No results	No results	39655.1	38627.1	41625.9	35594.7	50671.7	48899.7	49720.7	92973.4	38199.2	40310.8	44525.4	63172.1	0.775533	-0.366739	0.19803	0.694444	0.28073
Com_141_pos	UNII:OUT5YHB7BO	C18 H35 N O2	297.266	12.98	Full match	No results	No results	422148	424882	397747	342032	334011	483128	528122	381457	589701	555794	515629	379369	0.814878	-0.295344	0.072175	0.777778	0.260352
Com_1421_pos	N~2~-[2-Hydroxy-3-(triphenylsilyl)benzyl]-N,N-dimethylvalinamide	C32 H36 N2 O2 Si	508.253	8.602	Full match	No results	No results	9029.33	6566.8	9904.55	18655.6	11962.7	9838.39	26589.2	22220.8	30216.7	25638.7	37804.7	44821	0.352164	-1.50568	0.000171275	1	1.40445
Com_1422_pos	N~2~-[(9H-Fluoren-9-ylmethoxy)carbonyl]-N~6~-[4-(trityloxy)butanoyl]lysine	C44 H44 N2 O6	696.319	11.301	Full match	No results	No results	46077.9	34032.2	20796.9	22082.1	24295.9	36319.2	6309.03	15512.6	17327.1	12244.3	13684.8	7481.6	2.5304	1.33936	0.00134018	1	1.24979
Com_1423_pos	N~2~-[(3,5-Dichlorophenyl)acetyl]-N-[1-(dihydroxyboryl)-3-(methylsulfanyl)propyl]lysinamide	C18 H28 B Cl2 N3 O4 S	463.127	8.434	Full match	No results	No results	117658	110190	27246.1	118717	132525	98584	175325	66339.7	32661.4	211510	33672.4	42881.4	1.07562	0.105173	0.549616	0.555556	0.341598
Com_1424_pos	N~2~,N~6~-Bis{[(2-methyl-2-propanyl)oxy]carbonyl}lysine	C16 H30 N2 O6	346.211	13.493	Full match	No results	No results	211775	205619	147220	161180	161475	255859	132089	118806	91656.4	83981.6	71478.7	94804.2	1.9283	0.94733	0.000393723	1	0.866569
Com_1425_pos	N~2~,N~6~-Bis(2,3-dihydroxybenzoyl)-L-lysinamide	C20 H23 N3 O7	417.154	9.068	Full match	No results	No results	83246.3	52962.1	78834.2	80993.8	103087	95689.2	111491	108475	101878	123792	125364	130340	0.705525	-0.503231	0.00978622	0.972222	0.481642
Com_1426_pos	N~2~-(3-Chloro-4-methoxyphenyl)-N-(2,6-difluorophenyl)-N~2~-(methylsulfonyl)glycinamide	C16 H15 Cl F2 N2 O4 S	404.042	1.219	Full match	No results	No results	2.36458e+06	1.47391e+06	1.99077e+06	1.34498e+06	1.29523e+06	1.54104e+06	2.46934e+06	1.73666e+06	1.85003e+06	2.45769e+06	1.85655e+06	1.21478e+06	0.864089	-0.210748	0.344845	0.666667	0.189131
Com_1427_pos	N~2~-(3-{2-[2-(2-Azidoethoxy)ethoxy]ethoxy}propanoyl)-N~5~-{N-[(2,2,4,6,7-pentamethyl-2,3-dihydro-1-benzofuran-5-yl)sulfonyl]carbamimidoyl}ornithylglycyl-N~6~-{[(2-methyl-2-propanyl)oxy]carbonyl}lysine	C41 H68 N10 O13 S	940.469	14.532	Full match	No results	No results	62946.7	108476	81446.8	64940.4	65478.6	86654.5	44446.9	133337	98912.6	88017	125783	88872.3	0.81113	-0.301995	0.374113	0.75	0.24108
Com_1429_pos	N~1~-{7-[(1-Acetylcyclopropyl)amino]-5,7-dioxo-2-heptanyl}-N~2~-tetradecanoylaspartamide	C30 H52 N4 O6	564.391	9.378	Full match	No results	No results	49424.9	45677.9	45815.4	47590.3	37487.4	60353.3	15180	17304.7	7936.59	12891.8	55550.4	20736.9	2.20948	1.1437	0.0128596	0.861111	1.30836
Com_1430_pos	N-{9-[(2R,6S)-6-(Hydroxymethyl)-2-morpholinyl]-6-oxo-6,9-dihydro-3H-purin-2-yl}-2-methylpropanamide	C14 H20 N6 O4	336.156	12.924	Full match	No results	No results	35644.6	27595.6	41242.3	48861.5	45070.3	48957.6	47064.2	31928.8	30145	48374.2	31829.5	35314.1	1.10112	0.138966	0.459649	0.666667	0.13227
Com_1433_pos	N-{6-[5-(Phenylsulfamoyl)-3-pyridinyl][1,2,4]triazolo[1,5-a]pyridin-2-yl}acetamide	C19 H16 N6 O3 S	408.102	7.486	Full match	Invalid mass	No results	331585	134595	302363	127954	177546	99812.2	1.21576e+06	371620	502410	1.7191e+06	705546	349470	0.24134	-2.05086	0.00268503	1	1.7648
Com_1435_pos	N-{6-[5-(Butylsulfamoyl)-3-pyridinyl][1,2,4]triazolo[1,5-a]pyridin-2-yl}acetamide	C17 H20 N6 O3 S	388.134	7.653	Full match	No results	No results	100881	78128.6	145359	149465	84742.7	127225	170825	71068.9	183626	67262	51705.7	61979.4	1.13081	0.177361	0.399519	0.666667	0.333396
Com_143_pos	Undecylic acid	C11 H22 O2	186.162	13.799	Full match	No results	No results	333128	194322	232305	512623	326768	384186	271392	227155	336913	201050	158754	329697	1.30058	0.379154	0.213312	0.694444	0.328396
Com_1440_pos	N-{4-[(4-Hydroxybenzoyl)amino]butyl}-1,3-dimethyl-2,4-dioxo-1,2,3,4-tetrahydro-6-pteridinecarboxamide	C20 H22 N6 O5	426.164	11.327	Full match	No results	No results	81409.8	60458.4	69299.7	59218.3	65229	72831	40537	28773.8	18627	34869.1	51315.3	29348.1	2.0074	1.00533	0.00237248	1	0.972817
Com_1441_pos	N-{4-[(3-Chloro-4-fluorophenyl)amino]-7-(tetrahydro-3-furanyloxy)-6-quinazolinyl}-4-(dimethylamino)butanamide	C24 H27 Cl F N5 O3	487.177	11.429	Full match	No results	No results	10673.9	10038.5	11623.2	10399.9	9821.77	10825	17467.3	11309.1	11411.6	11596.4	11278.9	11001.2	0.855771	-0.224704	0.110928	0.861111	0.188766
Com_1442_pos	N-{4-[(3-Chloro-4-fluorophenyl)amino]-7-(2-propyn-1-yloxy)-6-quinazolinyl}-4-(dimethylamino)butanamide	C23 H23 Cl F N5 O2	455.155	5.963	Full match	No results	No results	41336.1	36702.1	31952	37243.1	30159.1	22367.9	15089.1	15673.4	8303.29	11223.2	76440.9	32489	1.25463	0.327257	0.183814	0.75	0.733515
Com_1443_pos	N-{4-[(2-Chlorobenzyl)oxy]phenyl}-6-ethoxy-2-methyl-4-quinolinamine	C25 H23 Cl N2 O2	418.146	12.31	Full match	No results	No results	1.95483e+06	2.38572e+06	2.00563e+06	1.44013e+06	1.85272e+06	2.18544e+06	1.14723e+06	1.55522e+06	1.35669e+06	898041	1.2739e+06	1.42921e+06	1.54361	0.626304	0.0021467	0.972222	0.574558
Com_1444_pos	N-{4-[({2-Amino-5-[(E)-iminomethyl]-4-oxo-1,4,5,6,7,8-hexahydro-6-pteridinyl}methyl)amino]benzoyl}glutamic acid	C20 H24 N8 O6	472.182	10.992	Full match	No results	No results	48231.9	46685.9	40239.4	42311	45738.2	40740.2	174916	66622.7	74370.3	69653.1	47143.4	61863.6	0.53369	-0.905926	0.0316468	0.972222	0.705297
Com_1445_pos	N-{3-[Benzyl(isopropyl)amino]propyl}-4-(2-chloro-6-fluorobenzyl)-3-oxo-3,4-dihydro-2H-1,4-benzothiazine-6-carboxamide	C29 H31 Cl F N3 O2 S	539.182	8.529	Full match	Invalid mass	No results	1.09577e+06	1.80766e+06	1.89554e+06	2.20203e+06	1.47543e+06	2.41123e+06	3.08407e+06	1.89509e+06	1.97779e+06	2.1679e+06	1.52686e+06	1.7882e+06	0.87522	-0.192283	0.377085	0.583333	0.196624
Com_1446_pos	N-{2-[Bis(diethylamino)phosphino]-1,3-thiazol-4-yl}-2,2-dimethylpropanamide	C16 H31 N4 O P S	358.196	10.465	Full match	Invalid mass	No results	673148	643288	634460	449257	710420	581295	393444	207242	409456	345809	524156	362604	1.64616	0.719107	0.00668455	0.972222	0.689201
Com_1448_pos	N-{2-[2-(2-{2-[(N-Methyl-beta-alanyl)amino]ethoxy}ethoxy)ethoxy]ethyl}-6-(5-methyl-2-oxo-4-imidazolidinyl)hexanamide	C22 H43 N5 O6	473.321	7.291	Full match	No results	No results	29085.3	26853.1	32204.6	31398.7	32458.1	30073.8	19164	18703.2	8534.63	14574.4	38597.1	12642.4	1.62253	0.698246	0.0342511	0.833333	0.797335
Com_1449_pos	N-{2-[([1-(2-Pentanyl)-4-piperidinyl]{[3-(trifluoromethyl)phenyl]carbamoyl}amino)methyl]phenyl}propanamide	C28 H37 F3 N4 O2	518.285	11.798	Full match	No results	No results	152260	202951	132062	152905	159692	108169	62237.8	110499	76028.2	51519.8	91396	96510	1.86001	0.89531	0.00172619	0.972222	0.837014
Com_1452_pos	N-{[1-({1-({(Z)-[(4R,5R)-5-(2,4-Dioxo-3,4-dihydro-1(2H)-pyrimidinyl)-4-hydroxydihydro-2(3H)-furanylidene]methyl}amino)-3-[(3-hydroxyphenylalanyl)(methyl)amino]-1-oxo-2-butanyl}amino)-4-(methylsulfanyl)-1-oxo-2-butanyl]carbamoyl}-3-hydroxyphenylalanine	C38 H48 N8 O12 S	840.315	12.679	Full match	No results	No results	6341.74	5991.52	6974.15	7244.93	6631.01	7113.49	7252.93	8441.04	7886.99	10272	6237.3	6781.08	0.859732	-0.218041	0.118291	0.777778	0.187498
Com_1453_pos	N-{[1-({1-({(E)-[5-(2,4-Dioxo-3,4-dihydro-1(2H)-pyrimidinyl)-4-hydroxydihydro-2(3H)-furanylidene]methyl}amino)-3-[(3-hydroxyphenylalanyl)(methyl)amino]-1-oxo-2-butanyl}amino)-4-methyl-1-oxo-2-pentanyl]carbamoyl}tryptophan	C41 H51 N9 O11	845.373	11.504	Full match	No results	No results	47371.7	23271.9	46360.2	20056	40273.4	27373.7	43611.4	72949.1	39669.3	19635.9	21904	33042.2	0.8869	-0.173157	0.763194	0.472222	0.113999
Com_1455_pos	N-{(2R)-2-[(1S)-1-Hydroxy-2-(hydroxyamino)-2-oxoethyl]-4-methylpentanoyl}glycyl-4-benzoyl-L-phenylalanyl-N~6~-5-hexynoyllysinamide	C38 H50 N6 O9	734.364	13.872	Full match	No results	No results	54475.8	65862.7	54068.5	102817	57033	93563.5	20031.6	28596.7	33307.3	36920.8	19429.9	24554.2	2.62724	1.39355	0.000125959	1	1.26276
Com_1456_pos	N-{(2E,4E)-5-[(2S,4E,6E,8S,11Z,13E,16S,17E,19R,20E)-8,16-Dimethoxy-3,12,19,21-tetramethyl-22-oxooxacyclodocosa-4,6,11,13,17,20-hexaen-2-yl]-2-methyl-2,4-hexadien-1-yl}-N~2~-formyl-L-serinamide	C38 H56 N2 O7	652.41	14.727	Full match	No results	No results	76089.9	74700.5	87444.4	80123.1	89189.2	73167	153494	179668	223466	192046	214930	186617	0.417932	-1.25866	6.06586e-07	1	1.14109
Com_1457_pos	N-{(2E,4E)-5-[(2S,3S,4E,6E,8S,11Z,13E,16S,17E,19E,21R,22E)-8,16-Dimethoxy-3,12,18,21,23-pentamethyl-24-oxooxacyclotetracosa-4,6,11,13,17,19,22-heptaen-2-yl]-2-methyl-2,4-hexadien-1-yl}-N~2~-formyl-L-serinamide	C41 H60 N2 O7	692.439	14.715	Full match	No results	No results	40297.1	43915	68610.8	58520	52214.1	64710.8	69352.1	115574	120837	92893.8	99303.4	122144	0.529375	-0.917639	0.000443142	1	0.835958
Com_1458_pos	N-{(1Z,3E)-5-[(2S,4R,7S,10S,13E,15R,16R,17R,19R)-15,16-Dihydroxy-2,7,14,15,24-pentamethyl-6,9,12-trioxo-11,18,27,28,29-pentaoxapentacyclo[21.3.1.1~1,4~.1~20,24~.0~17,19~]nonacos-13-en-10-yl]-1,3-pentadien-1-yl}butanamide	C38 H55 N O11	701.375	12.684	Full match	No results	No results	114487	53006.4	83465	83365.1	90493.3	63886.2	30588.1	22748.1	28173	17534.2	73353.6	38189.8	2.32067	1.21454	0.00408619	0.944444	1.21886
Com_145_pos	ubiquinone-6	C39 H58 O4	590.432	12.324	Full match	No results	No results	74815.7	139624	115590	160364	140248	190820	70974.1	160908	90111	43790.1	74221.6	114535	1.48134	0.566904	0.0846448	0.805556	0.571297
Com_1461_pos	N-[6-(Dinaphtho[2,1-d:1',2'-f][1,3,2]dioxaphosphepin-4-yl)-2-pyridinyl]-2,2-dimethylpropanamide	C30 H25 N2 O3 P	492.16	7.056	Full match	No results	No results	73817.6	55412.2	60914.3	65052.1	72002.7	88835.3	70830.3	37796.7	46326.3	47412.5	37631.7	22386.9	1.58559	0.66502	0.0202367	0.916667	0.66733
Com_1462_pos	N-[5-Benzyl-15-(3-carbamimidamidopropyl)-21-hydroxy-2-isobutyl-8-isopropyl-4,11-dimethyl-3,6,9,13,16,22-hexaoxo-10-oxa-1,4,7,14,17-pentaazabicyclo[16.3.1]docos-12-yl]-N~2~-hexanoyl-alpha-asparagine	C46 H72 N10 O12	956.529	14.446	Full match	No results	No results	386346	387875	582614	539241	490383	452675	382354	634456	478947	346317	595822	679273	0.910805	-0.134786	0.593926	0.583333	0.107322
Com_1463_pos	N-[4-Cyano-3-(trifluoromethyl)phenyl]-2-diazo-N-(2-methoxyethyl)-3-oxobutanamide	C15 H13 F3 N4 O3	354.094	9.507	Full match	Invalid mass	No results	5643.1	5514.39	5888.98	5726.12	5430.7	5505.95	6449.76	6012.96	5757.16	5379.35	5243.28	5888.17	0.97059	-0.0430662	0.431487	0.611111	0.0394486
Com_1464_pos	N-[4-Chloro-1-oxo-3-(2-phenylethoxy)-1H-isochromen-7-yl]-6-({5-[(3aR,4R,6aS)-2-oxohexahydro-1H-thieno[3,4-d]imidazol-4-yl]pentanoyl}amino)hexanamide	C33 H39 Cl N4 O6 S	654.228	8.811	Full match	No results	No results	73868.1	74492.9	89037.2	78514.7	87269.5	99505.7	81470.7	72235.6	69124.4	112349	59079.6	89114.8	1.03996	0.0565236	0.610851	0.611111	0.108172
Com_1465_pos	N-[4-(8-Amino-3-isopropylimidazo[1,5-a]pyrazin-1-yl)-1-naphthyl]-3-(trifluoromethyl)benzamide	C27 H22 F3 N5 O	489.178	7.574	Full match	No results	No results	51397.1	30791.2	40743.2	44113.8	30340.5	58914.7	63036.1	49865.7	41714	40768	30092.8	43796.4	0.951824	-0.0712332	0.721201	0.527778	0.0752555
Com_1466_pos	N-[4-(2-Methyl-2-propanyl)phenyl]-6-nitro-4-quinazolinamine	C18 H18 N4 O2	322.142	10.388	Full match	No results	No results	35539.8	47265.3	35104.2	16705.2	13398.3	21208.2	30784.8	39310.3	45387.2	269371	86888	40323.8	0.330467	-1.59742	0.0530775	0.833333	1.14359
Com_1467_pos	N-[3,5-Bis(sulfanylmethyl)benzyl]asparagine	C13 H18 N2 O3 S2	314.076	6.985	Full match	Invalid mass	No results	7183.08	6246.07	5293.37	5825.43	6339.57	5863.54	6880.84	6220.8	5884	6943.51	9678.46	5925.74	0.884857	-0.176484	0.236019	0.694444	0.168433
Com_1468_pos	N-[3-(3,4-Dihydro-2(1H)-isoquinolinyl)-2-hydroxypropyl]-6-(3-oxetanylamino)-4-pyrimidinecarboxamide	C20 H25 N5 O3	383.196	14.898	Full match	No results	No results	879836	1.00769e+06	580273	610004	708272	792244	953959	722978	660324	780797	1.02631e+06	650350	0.954866	-0.0666294	0.679372	0.583333	0.0968964
Com_146_pos	Ubenimex	C16 H24 N2 O4	308.173	6.128	Full match	No results	No results	4326.02	5256.42	4930.64	11244.2	3848.26	4412.86	4887.6	4586.65	4495.37	5243.3	4997	4331.67	1.19189	0.253247	0.54228	0.527778	0.141765
Com_1470_pos	N-[3-(2-Amino-5-methoxyphenyl)-3-oxopropyl]acetamide	C12 H16 N2 O3	236.116	5.68	Full match	No results	No results	456237	429177	369935	529305	376638	363507	57190.9	40352.8	32618.5	30978.3	103840	42986.1	8.19828	3.03532	2.56393e-05	1	2.87749
Com_1471_pos	N-[3-(1-Piperidinyl)propyl]-2-[3-(trifluoromethyl)phenyl]-4-quinolinamine	C24 H26 F3 N3	413.207	11.893	Full match	No results	No results	353543	492086	278978	183559	114139	49994.8	229681	170918	204499	124196	238422	157198	1.30881	0.388257	0.890088	0.583333	0.0693191
Com_1472_pos	N-[3-(1H-Imidazol-1-yl)propyl]hexanamide	C12 H21 N3 O	223.168	14.567	Full match	No results	No results	7848.91	6779.4	7198.7	7147.3	7416.88	7364.62	8414.32	7993.95	7358.54	8603	8922.55	7435.35	0.897966	-0.155268	0.0222168	0.888889	0.14178
Com_1473_pos	N-[2-(4-Methoxyphenyl)ethyl]-N'-{4-[4-(2-propyn-1-yloxy)benzoyl]phenyl}ethanediamide	C27 H24 N2 O5	456.166	10.032	Full match	No results	No results	335918	249668	192902	227804	224504	366078	227298	343546	213849	194688	220064	185678	1.15288	0.205236	0.335662	0.722222	0.196057
Com_1474_pos	N-[2-(4-Amino-5,8-difluoro-1,2-dihydro-2-quinazolinyl)ethyl]-3-furamide	C15 H14 F2 N4 O2	320.107	1.352	Full match	No results	No results	1.23704e+06	1.1528e+06	1.19723e+06	1.24014e+06	1.56282e+06	945668	1.91595e+06	3.30691e+06	3.31584e+06	955772	1.11385e+06	746049	0.646068	-0.630243	0.345097	0.555556	0.36687
Com_1476_pos	N-[2-({[2-Acetyl-5-(2-oxiranylmethoxy)phenoxy]acetyl}amino)ethyl]-7-(diethylamino)-2-oxo-2H-chromene-3-carboxamide	C29 H33 N3 O8	551.226	9.901	Full match	No results	No results	48490.3	30139.7	287094	1.68131e+06	109121	370407	2.99949e+06	48976.3	123491	362738	39823	43740.6	0.698281	-0.518121	0.871771	0.527778	0.412921
Com_1477_pos	N-[12,14-Diazahexacyclo[11.7.4.0~1,13~.0~2,11~.0~3,8~.0~15,20~]tetracosa-2(11),3(8),4,6,9,15,17,19-octaen-12-yl]benzamide	C29 H25 N3 O	431.201	6.86	Full match	No results	No results	74139.1	51882.3	64589.7	68066.6	58283.8	55829.2	12687.2	5969.36	6380.4	12042.3	35172.9	11801.7	4.43514	2.14898	0.0011059	1	2.2003
Com_1479_pos	N-[1-(Dihydroxyboryl)-3-(methylsulfanyl)propyl]-N~2~-[(6-phenyl-2-pyridinyl)carbonyl]lysinamide	C22 H31 B N4 O4 S	458.214	10.279	Full match	Invalid mass	No results	283391	229287	285398	277385	301823	306565	1.68009e+06	1.56412e+06	2.13279e+06	1.83739e+06	443684	1.11561e+06	0.19192	-2.38142	0.00100658	1	2.03793
Com_1480_pos	N-[1-(Dihydroxyboryl)-3-(methylsulfanyl)propyl]-N~2~-(phenylacetyl)lysinamide	C18 H30 B N3 O4 S	395.205	8.015	Full match	No results	No results	152959	110463	130917	125061	98268.8	108592	20682.6	27282.2	13177.2	19404.7	21013.9	18377.9	6.05527	2.59819	1.10669e-07	1	2.38243
Com_1481_pos	N-[1-(Dihydroxyboryl)-3-(methylsulfanyl)propyl]-N~2~-(4-pyrimidinylcarbonyl)lysinamide	C15 H26 B N5 O4 S	383.178	9.384	Full match	No results	No results	49104.2	45216.8	48627.5	46416.8	45024.1	50882.9	256578	214538	311743	344695	140796	189174	0.195724	-2.35311	6.36895e-05	1	2.08732
Com_1482_pos	N-[1-(Dihydroxyboryl)-3-(methylsulfanyl)propyl]-N~2~-(4-morpholinylacetyl)lysinamide	C16 H33 B N4 O5 S	404.225	15.353	Full match	No results	No results	23009	63342.1	25839.1	36796.1	32950.5	25986.8	85860.1	63777.1	68425	53778.8	79652.2	39743.9	0.531451	-0.911991	0.00632026	0.944444	0.875491
Com_1483_pos	N-[1-(Dihydroxyboryl)-3-(methylsulfanyl)propyl]-N~2~-(3-pyridinylcarbonyl)lysinamide	C16 H27 B N4 O4 S	382.183	14.566	Full match	No results	No results	3683.58	3894	5240.9	3076.73	2877.32	4387.75	5925.29	3209.22	3248.28	5447.73	5451.62	7580.02	0.750443	-0.414185	0.157316	0.777778	0.342952
Com_1484_pos	N'-[(E)-1H-Imidazol-2-ylmethylene]-4-methylbenzenesulfonohydrazide	C11 H12 N4 O2 S	264.068	6.818	Full match	Invalid mass	No results	25966	17734.5	28718.4	35273.6	31483.1	29724.3	43726.4	39122.8	43968.2	54383.4	39940.4	31316.6	0.669022	-0.579874	0.00798866	0.944444	0.539079
Com_1485_pos	N-[(Benzyloxy)carbonyl]-L-phenylalanyl-N~6~-(6-{2-[(1E,3E,5Z)-5-(1-ethyl-3,3-dimethyl-5-sulfo-1,3-dihydro-2H-indol-2-ylidene)-1,3-pentadien-1-yl]-3,3-dimethyl-5-sulfo-3H-indolium-1-yl}hexanoyl)-L-lysinamide	C56 H69 N6 O11 S2	1065.44	12.671	Full match	No results	No results	27080.2	7670.34	8144.78	5976.79	7040.51	7514.69	5863.65	9938.31	6506.46	5441.25	20014.6	5385.65	1.19337	0.255037	0.644535	0.694444	0.31984
Com_1488_pos	N-[(5-{[(3-Chlorophenyl)(methyl)amino]methyl}-2-thienyl)carbonyl]-3-cyclohexylalanyl-N-(2-methoxyethyl)valinamide	C30 H43 Cl N4 O4 S	590.269	13.213	Full match	Invalid mass	No results	899430	1.27583e+06	1.26497e+06	1.11207e+06	1.65006e+06	1.20981e+06	6.61748e+06	1.07267e+07	6.49741e+06	6.30438e+06	4.79623e+06	7.89947e+06	0.173013	-2.53105	3.57728e-07	1	2.28652
Com_1494_pos	N-[(3Z,6S,9R,12R,15R,16R)-3-Ethylidene-6-(4-hydroxybenzyl)-12-isobutyl-9-isopropyl-16-methyl-2,5,8,11,14-pentaoxo-1-oxa-4,7,10,13-tetraazacyclohexadecan-15-yl]-2,4,6-trimethylnonanamide	C40 H63 N5 O8	741.465	13.883	Full match	No results	No results	88649.1	97349.3	83256.2	89860.4	105495	115568	34752.3	78587.6	82001.5	77573.5	57200.6	95157.7	1.36425	0.448107	0.0649228	0.916667	0.465032
Com_1495_pos	N-[(3r)-Adamantan-1-yl]-3',4'-difluoro-2-biphenylcarboxamide	C23 H23 F2 N O	367.173	8.5	Full match	No results	No results	8998.62	14432.5	11702.5	8440.37	9088.63	11970.7	8751.56	8245.79	8729.89	9327.03	6129.88	8287.08	1.30648	0.385689	0.0371674	0.861111	0.35076
Com_1498_pos	N-[(2S,3R,4S)-1-Cyclohexyl-3,4-dihydroxy-6-methyl-2-heptanyl]-N~2~-{(2S)-2-[(4-methyl-1-piperazinyl)sulfonyl]-3-phenylpropanoyl}-3-(1,3-thiazol-4-yl)-L-alaninamide	C34 H53 N5 O6 S2	691.34	11.533	Full match	No results	No results	61829.2	69519.7	89234.2	79813.2	74769.7	84420.1	27798.1	18856.9	34440.4	16830.5	36031.8	21731.4	2.95195	1.56167	0.000117297	1	1.46752
Com_1499_pos	N-[(2R)-2-Benzyl-4-(hydroxyamino)-4-oxobutanoyl]-L-tryptophyl-4-benzoyl-L-phenylalanyl-N~6~-5-hexynoyllysinamide	C50 H55 N7 O8	881.411	15.895	Full match	No results	No results	18781.2	27085.6	27541.5	27424.4	21867.4	18919	42405.2	50273.1	50629	36278.9	29289.9	42622.3	0.563102	-0.828532	0.000542071	1	0.751987
Com_149_pos	U-50488	C19 H26 Cl2 N2 O	368.144	9.079	Full match	Full match	No results	552945	939035	1.32431e+06	895596	856299	956975	895505	1.31097e+06	1.56658e+06	660060	357561	714508	1.00363	0.0052257	0.749119	0.583333	0.221621
Com_1500_pos	N-[(1S,9aS)-Octahydro-2H-quinolizin-1-yl]acetamide	C11 H20 N2 O	196.157	7.468	Full match	No results	No results	82279.2	89630.7	94954.5	93521.8	50732.4	116715	104232	61290.7	96341.3	113322	71721.1	84866.5	0.992593	-0.0107261	0.921378	0.472222	0.0704609
Com_1502_pos	N-[(1R,11S,14S,17S,20S,23S,33R)-23-Benzyl-17-isobutyl-14-methyl-12,15,18,21,24-pentaoxo-2,13,16,19,22,25-hexaazaheptacyclo[18.11.1.1~1,22~.1~2,9~.0~3,8~.0~25,33~.0~26,31~]tetratriaconta-3,5,7,9(34),26,28,30-heptaen-11-yl]-L-phenylalaninamide	C49 H52 N8 O6	848.404	6.853	Full match	No results	No results	722679	591539	792121	672824	477594	397723	494598	218600	128602	231868	922152	288315	1.59994	0.678018	0.0707675	0.777778	0.874939
Com_1503_pos	N-[(1E,3S)-5-Phenyl-1-(phenylsulfonyl)-1-penten-3-yl]-L-alaninamide	C20 H24 N2 O3 S	372.152	7.432	Full match	No results	No results	32232.8	62703.5	45724	68420.5	59635.6	64084.3	31137	74619.1	64120.5	18539.2	42099.7	34303.6	1.25671	0.329652	0.243605	0.638889	0.399223
Com_1504_pos	N-[(12E)-1-(beta-D-Glucopyranosyloxy)-3,4-dihydroxy-12-icosen-2-yl]-2-hydroxyoctadecanamide	C44 H85 N O10	787.617	1.134	Full match	No results	No results	2.25753e+06	1.88497e+06	1.84388e+06	2.04271e+06	2.19897e+06	1.98557e+06	2.474e+06	320020	2.21546e+06	2.37541e+06	2.66027e+06	2.56769e+06	0.968348	-0.046403	0.679108	0.805556	0.211724
Com_1505_pos	N,N-Dimethylsphingosine	C20 H41 N O2	309.302	15.345	No results	Invalid mass	No results	2.62526e+07	8.86293e+07	2.28854e+07	3.71945e+07	3.39643e+07	2.4519e+07	9.74016e+07	7.66571e+07	7.41908e+07	5.3549e+07	8.68867e+07	3.47158e+07	0.551357	-0.858941	0.0282377	0.833333	0.8805
Com_1510_pos	N,N-Dimethyl-2-{2-[(1S,9R,10S,15R,16R)-12,14,14,19-tetramethyl-8,19-diazapentacyclo[7.7.3.0~1,9~.0~2,7~.0~10,15~]nonadeca-2,4,6,11-tetraen-16-yl]-1H-indol-3-yl}ethanamine	C33 H42 N4	494.343	10.398	Full match	No results	No results	6020.43	5077.26	5339.43	5149.39	5091.48	5242.4	6073.96	5630.57	5978.95	5757.83	5537.6	5635.96	0.922158	-0.116914	0.0263951	0.861111	0.108111
Com_1512_pos	N,N-Dimethyl-2-[(pentafluorophenyl)boryl]aniline	C14 H11 B F5 N	299.091	8.891	Full match	Invalid mass	No results	111296	134359	85837.1	129104	119275	99494.1	146936	137230	122191	139707	103302	109425	0.895326	-0.159515	0.236554	0.722222	0.149456
Com_1513_pos	N,N'-Dihydroxyoctanediamide	C8 H16 N2 O4	204.111	1.32	Full match	No results	No results	519066	744022	657668	1.00964e+06	588608	749847	439460	556324	583620	438196	636444	665732	1.28588	0.362761	0.0720752	0.805556	0.32049
Com_1517_pos	N,N-Dihydroxy-L-tryptophan	C11 H12 N2 O4	236.079	6.297	Full match	No results	No results	12509.7	14393.8	19110	15976.6	12622.9	11829	10207.8	16758.6	17607.7	17663.9	22930.1	18085.9	0.837176	-0.256397	0.243077	0.722222	0.219339
Com_1518_pos	N,N-Dibenzyl-1-(4-fluorophenyl)ethanamine	C22 H22 F N	319.173	6.886	Full match	No results	No results	90117.6	69453.9	65075.4	86607.4	83390	88850.3	9646.96	6806.85	9168.59	9311.59	15654.1	8440.38	8.19087	3.03402	3.45844e-07	1	2.79772
Com_151_pos	U-47700	C16 H22 Cl2 N2 O	328.113	6.884	No results	Invalid mass	No results	115390	79970.6	74350.7	66403.9	104565	84570.3	221071	86378.4	140645	196233	130307	99178.7	0.601102	-0.734318	0.026252	0.888889	0.620235
Com_1521_pos	N,N-diacetyllegionaminic acid	C13 H22 N2 O8	334.137	9.49	Full match	No results	No results	139199	145355	187835	150600	156311	179706	250530	178464	241593	237722	96125.3	118243	0.854214	-0.22733	0.589762	0.611111	0.200204
Com_1522_pos	N,N'-Bis(5,7-dimethyl-6-oxido-6,7-dihydro-5H-dibenzo[d,f][1,3,2]diazaphosphepin-6-yl)-N,N'-dimethyl-1,5-pentanediamine	C35 H44 N6 O2 P2	642.302	13.551	Full match	No results	No results	1.71595e+07	9.97613e+06	1.34605e+07	1.5161e+07	1.46884e+07	1.94483e+07	1.46292e+07	8.67893e+06	1.36935e+07	9.42068e+06	8.87617e+06	1.36118e+07	1.30451	0.383503	0.0768101	0.833333	0.358233
Com_1524_pos	N,N'-Bis(1-pyrenylmethyl)isophthalamide	C42 H28 N2 O2	592.213	8.725	Full match	No results	No results	41026.1	27630.4	52359.8	191952	127057	40669.3	272821	359247	234132	176726	106896	180824	0.361249	-1.46893	0.00944974	0.888889	1.57564
Com_1526_pos	N,N-Bis(1-phenylethyl)dinaphtho[2,1-d:1',2'-f][1,3,2]dioxaphosphepin-4-amine	C36 H30 N O2 P	539.2	10.605	Full match	No results	No results	10301.8	9885.96	10977.8	10195.9	9876.03	10665.5	12308.5	12852.5	15455.2	12357.2	11695.9	24806.4	0.691841	-0.531487	0.0353368	1	0.436674
Com_1527_pos	N,N'-1,2-Ethanediylbis(2-{7-(3,5-dimethyl-1,2-oxazol-4-yl)-8-methoxy-2-oxo-1-[1-(2-pyridinyl)ethyl]-1,2-dihydro-3H-imidazo[4,5-c]quinolin-3-yl}acetamide)	C52 H50 N12 O8	970.386	14.522	Full match	No results	No results	7186.29	3163.53	5065.15	4655.71	8572.19	13728.2	10234.1	5121.12	4765.89	5215.21	8891.08	17080	0.825826	-0.27609	0.533496	0.666667	0.257115
Com_1528_pos	N,N'-[6,6'-Bis(allyloxy)-3,3'-biphenyldiyl]bis[1-(2,2-dimethylpropanoyl)-2-pyrrolidinecarboxamide] (non-preferred name)	C38 H50 N4 O6	658.371	13.935	Full match	No results	No results	455265	439713	298786	331154	377751	589127	215955	350502	569258	264715	242901	298488	1.28323	0.359777	0.141645	0.805556	0.367226
Com_152_pos	U0126	C18 H16 N6 S2	380.086	9.589	Full match	No results	No results	8934.16	8551.64	9276.49	8645.71	8433.95	8353.75	10761.7	9401.07	9592.2	9937.81	8864.42	10632.6	0.881836	-0.181417	0.00754621	0.944444	0.164707
Com_1531_pos	N,N,N',N'-Tetrakis[4-(allyloxy)phenyl]-4,4'-biphenyldiamine	C48 H44 N2 O4	712.327	14.079	Full match	No results	No results	6.11793e+06	9.82717e+06	7.54791e+06	4.57722e+06	5.51936e+06	3.33547e+06	3.23904e+06	3.08985e+06	2.64973e+06	4.52235e+06	2.38305e+06	4.5055e+06	1.81098	0.856772	0.0151638	0.944444	0.755315
Com_1538_pos	N,N',N'',N'''-(Oxybis{[(1R,2S,3S,3aS,6aS,7aR,10aR,10bS)-5,9-diamino-10a-hydroxy-2,3,4,6a,7a,10,10a,10b-octahydro-1H-cyclopenta[3,4]imidazo[4',5':5,6]pyrano[2,3-d]imidazole-3,1,2-triyl]bis(methylene)})tetrakis(4,5-dibromo-1H-pyrrole-2-carboxamide)	C44 H46 Br8 N20 O9	1629.73	15.542	Full match	No results	No results	1728.48	1511.81	1509.84	1624.38	1491.72	1487.27	4601.84	1970.61	1943.99	1804.62	2476.28	4963.69	0.52663	-0.925137	0.0304806	1	0.725973
Com_1539_pos	N,3,4,5-Tetramethoxy-N-methylbenzamide	C12 H17 N O5	255.11	1.33	Full match	Invalid mass	No results	23395.7	11042.1	16615.3	17229.2	11013.5	19850.8	12997.3	12876.2	12985.2	16471.5	12040.2	11668.5	1.2544	0.326999	0.196119	0.666667	0.255787
Com_1540_pos	N-(Tetrahydrofuran-2-ylmethyl)quinoline-8-sulfonamide	C14 H16 N2 O3 S	292.092	7.842	No match	Invalid mass	No results	5.5307e+06	3.92561e+06	3.41618e+06	3.81149e+06	5.35409e+06	4.54532e+06	2.37965e+06	2.57003e+06	2.60599e+06	2.78452e+06	2.71718e+06	2.7343e+06	1.68338	0.751362	0.000949182	1	0.665467
Com_1541_pos	N-(tert-Butoxycarbonyl)-L-leucine	C11 H21 N O4	231.147	7.907	Full match	No results	No results	79630.6	63128.7	56478.3	51382.2	55364.5	45431.3	34871.1	36409	36080.3	40513.6	26891.8	33653.6	1.6861	0.753688	0.000464096	1	0.678223
Com_1544_pos	N(alpha)-citryl-N(epsilon)-acetyl-N(epsilon)-hydroxylysine	C14 H22 N2 O10	378.128	7.299	Full match	No results	No results	36653.6	31279	45148.3	22115.6	32222	40268.5	24059.4	13413.9	20390.4	28267.4	13929.1	17579	1.76546	0.820042	0.00454446	0.944444	0.780681
Com_1545_pos	N-(9-Ethyl-9H-carbazol-3-yl)-2-{4-[(4-methoxyphenyl)sulfonyl]-1-piperazinyl}acetamide	C27 H30 N4 O4 S	506.197	11.347	Full match	No results	No results	43109.2	25240.3	29466.9	43095.1	28261.5	27293.9	31773	29162.2	30631.9	97527.1	29713.9	33976.7	0.777209	-0.363625	0.478582	0.694444	0.21523
Com_1546_pos	N'-(9-Acridinyl)-N-(1-naphthylmethyl)-N-(2-pyridinylmethyl)-1,2-ethanediamine	C32 H28 N4	468.233	10.352	Full match	No results	No results	54600.2	48267.5	55883.9	40552.2	49184.6	42789.7	89159.7	69777.2	69980	76585.6	78375.2	64263.6	0.649969	-0.621557	0.000112169	1	0.567773
Com_1548_pos	N-(6-Methoxybenzo[d]thiazol-2-yl)-2-(4-methylpiperidin-1-yl)acetamide	C16 H21 N3 O2 S	319.137	1.334	Full match	No results	No results	84981.9	88564.2	142438	208302	134677	165152	283300	191743	133062	62648.7	180251	140032	0.831569	-0.266092	0.594239	0.583333	0.201447
Com_1549_pos	N(6)-[(indol-3-yl)acetyl]-L-lysine	C16 H21 N3 O3	303.157	14.89	Full match	Invalid mass	No results	192075	191721	138656	134411	144309	132220	272067	254539	209120	277377	314912	165157	0.625106	-0.677828	0.00352282	0.944444	0.611966
Com_1552_pos	N(6)-(dimethylallyl)adenosine 5'-monophosphate	C15 H22 N5 O7 P	415.126	8.664	Full match	No results	No results	112224	143169	188661	127332	211501	144851	143801	58391.5	96478.3	78001	25565.2	68687.6	1.97004	0.978223	0.0200648	0.916667	1.0665
Com_1554_pos	N-(4-Oxobutyl)-L-glutamine	C9 H16 N2 O4	216.111	1.328	Full match	No results	No results	729763	385178	315095	469273	307216	518912	478024	322666	276193	620316	340814	331925	1.15	0.201639	0.483374	0.583333	0.17637
Com_1555_pos	N-(4-Ethyl-2-pyridinyl)-3,4-dimethoxybenzenesulfonamide	C15 H18 N2 O4 S	322.102	6.714	No results	Invalid mass	No results	679359	804051	1.04286e+06	987625	1.11984e+06	587662	789093	520489	965808	478413	304956	564696	1.441	0.527069	0.0700123	0.861111	0.564771
Com_1556_pos	N-(4-Chlorobenzyl)-2-[(8E)-5,12-dioxo-2-phenyl-1-oxa-4-azacyclododec-8-en-6-yl]acetamide	C25 H27 Cl N2 O4	454.168	8.239	Full match	No results	No results	102565	77738.8	74140.5	83823.9	92787.9	89888.7	185845	78728.9	145691	130849	46033.8	56234.7	0.809696	-0.304548	0.706118	0.555556	0.197347
Com_1557_pos	N-(4-Ammonio-4-carboxylatobutanoyl)-S-[(1Z)-N-hydroxy-2-phenylethanimidoyl]cysteinylglycine	C18 H24 N4 O7 S	440.135	11.724	Full match	No results	No results	13558.7	15389.4	14509.3	14942.8	13563.6	14761.3	112346	155965	205343	91282.3	36293.2	120055	0.120237	-3.05605	0.000415924	1	2.62376
Com_1559_pos	N-(4-Amino-1-carboxybutyl)glutamic acid	C10 H18 N2 O6	262.117	7.038	Full match	No results	No results	149262	82630.2	26455.2	51371.7	103173	20520.4	77569.2	18727.1	24929.3	185668	40172.1	25558	1.16314	0.218021	0.579622	0.638889	0.361882
Com_155_pos	Tyrosol	C8 H10 O2	138.068	11.537	Full match	No results	No results	69282	53184.4	59395.2	59039.8	62805.9	70420.7	75768.3	51765.4	62066.7	71505.4	63151.5	62797.4	0.966602	-0.0490057	0.659349	0.611111	0.0430967
Com_1560_pos	N-(4-{[(5R)-7-Chloro-5-hydroxy-2,3,4,5-tetrahydro-1H-1-benzazepin-1-yl]carbonyl}-3-methylphenyl)-2-methylbenzamide	C26 H25 Cl N2 O3	448.157	10.031	Full match	No results	No results	323137	200636	201559	239625	299041	414925	263588	311916	193323	169032	85692.3	192550	1.38058	0.465274	0.131996	0.805556	0.481676
Com_1563_pos	N-(4-{[(2-Amino-4-oxo-1,4,5,6,7,8-hexahydro-6-pteridinyl)methyl]amino}benzoyl)-gamma-glutamylglutamic acid	C24 H30 N8 O9	574.215	8.058	Full match	No results	No results	7451.69	6580.31	7008.47	6947.86	6931.72	7780.95	7975.25	7298.23	7593.49	7759.45	7512.64	7547.75	0.934646	-0.0975078	0.0379481	0.833333	0.0902826
Com_1564_pos	N-(4-{[(2-Amino-4-oxo-1,4,5,6,7,8-hexahydro-6-pteridinyl)methyl](formyl)amino}benzoyl)-gamma-glutamylglutamic acid	C25 H30 N8 O10	602.21	6.607	Full match	No results	No results	5712.81	4727.46	5239.05	5480.65	5271.56	6012.39	6154.51	5884.76	5882.93	5912.08	6054.21	5789.78	0.909347	-0.137098	0.0329503	0.888889	0.1294
Com_1565_pos	N-(4,5,7-Tricarboxyheptanoyl)-gamma-glutamyl-N-[2-(4-{[5-(aminomethyl)-3-furyl]methoxy}phenyl)ethyl]glutamine	C34 H44 N4 O15	748.28	14.293	Full match	Invalid mass	No results	110902	97017.2	80931.1	93355.3	79019.9	73047.7	62246.5	51337.3	110381	69017.7	40287.1	78586.9	1.29723	0.375438	0.0948117	0.833333	0.413596
Com_1567_pos	N(4)-phosphoagmatine	C5 H15 N4 O3 P	210.088	10.265	Full match	No results	No results	6978.78	5111.12	5700.45	7189.56	6414.92	8827.78	29724.4	12062.4	17093.5	21543.9	9747.64	5363.97	0.421021	-1.24803	0.0304359	0.861111	0.969947
Com_1569_pos	N-(4-(4-(10-Hydroxy-7,7-dimethyl-1,3-dioxochromeno[4,3-c][1,2,4]triazolo[1,2-a]pyridazin-2(1H,3H,5H,7H,12bH)-yl)benzoyl)phenyl)hex-5-ynamide	C34 H30 N4 O6	590.216	8.573	Full match	No results	No results	9110.5	6568.32	7233.25	7321.35	7822.4	7489.99	339622	9064.38	86621.3	154311	8060.68	7868.64	0.0752142	-3.73285	0.069792	0.916667	2.13335
Com_1570_pos	N-(3-Methylphenyl)-4,5,6,7-tetrahydro-1H-pyrazolo[4,3-c]pyridine-3-carboxamide	C14 H16 N4 O	256.131	6.48	Full match	No results	No results	22202.3	25012	27404.9	18768.7	27101.6	24569.6	71201.2	80247.9	62158.5	57249.8	35140.4	59223.9	0.39718	-1.33213	0.000173997	1	1.18559
Com_1571_pos	N-(3-Carboxypropanoyl)glutamic acid	C9 H13 N O7	247.07	8.814	Full match	No results	No results	1959.87	4231.1	6755.27	5111.97	4335.51	51742	2702.18	2084.98	2693.92	3061.49	2741.65	3609.46	4.38837	2.13369	0.12957	0.833333	1.08488
Com_1572_pos	N-(3-Carboxypropanoyl)-5-hydroxynorvaline	C9 H15 N O6	233.089	1.293	Full match	No results	No results	358747	365824	272764	356092	364317	398080	273323	231432	267148	282072	204323	224364	1.42704	0.513031	0.000747912	0.944444	0.46894
Com_1573_pos	N-(3-Azidopropyl)-4-(4-(6-(4-methylpiperazin-1-yl)-1H-benzo[d]imidazol-2-yl)phenoxy)butanamide-fluorescein conjugate	C50 H49 N9 O5	855.386	11.63	Full match	No results	No results	10767.8	16065.2	14589.4	10004.5	9085.08	9942.02	12265.4	12026	10061.5	9793.6	21210	22081.1	0.805762	-0.311574	0.327822	0.666667	0.248651
Com_1575_pos	N-(3-Acetylphenyl)-3-amino-4,6-dimethylthieno[2,3-b]pyridine-2-carboxamide	C18 H17 N3 O2 S	339.103	8.082	Full match	No results	No results	18135.3	12440	13249.4	13134.8	13104.3	14709.7	18672	13797.2	20523.8	16743.6	14202.5	14268.9	0.863204	-0.212226	0.133356	0.805556	0.190552
Com_1576_pos	N-(3,4-Dihydro-2H-chromen-6-yl)-2-methyl-1-oxo-1,2-dihydro-4-isoquinolinecarboxamide	C20 H18 N2 O3	334.131	9.16	Full match	No results	No results	155029	126292	93000.5	153124	119678	116414	14322.8	15435.6	13824.9	13601.5	17199.9	14682.7	8.57259	3.09973	4.45849e-08	1	2.8081
Com_1577_pos	N-(2-Oxotetrahydrofuran-3-yl)octanamide	C12 H21 N O3	227.152	6.344	Full match	No results	No results	22340.9	24876.6	11866.3	18041.2	14298.7	11648.6	23708.4	22337.8	10831.3	67988.2	13403.2	13056.4	0.681131	-0.553995	0.519187	0.527778	0.272942
Com_1580_pos	N-(2-Oxotetrahydro-3-furanyl)hexanamide	C10 H17 N O3	199.121	8.02	Full match	No results	No results	23655.8	21446.8	18842.8	16229.2	15811.6	22294.5	25578.3	15221.9	25584.5	10788.3	27194.2	24406.5	0.918517	-0.122621	0.800455	0.666667	0.0782234
Com_1581_pos	N-(2-Methyl-2-propanyl)-5-[2-({[2-(1H-1,2,4-triazol-1-yl)ethyl]carbamoyl}amino)[1,2,4]triazolo[1,5-a]pyridin-6-yl]-3-pyridinesulfonamide	C20 H24 N10 O3 S	484.176	12.56	Full match	Invalid mass	No results	32056.1	34113.4	37535.9	38548.2	35000.4	32741.9	29142.1	42452.4	33499.7	37420.1	37449.6	34945.3	0.977137	-0.0333671	0.761329	0.527778	0.0312993
Com_1582_pos	N-(2-Furylmethyl)-4-({2-[(4-nitrobenzyl)sulfanyl]-4-oxo-3(4H)-quinazolinyl}methyl)cyclohexanecarboxamide	C28 H28 N4 O5 S	532.176	9.119	Full match	No results	No results	37446.6	32624.5	43017.5	35786.4	34237.5	33078.6	14351.3	36616.3	20628.5	25602.1	26107	33210.1	1.38128	0.466004	0.0461704	0.833333	0.478078
Com_1583_pos	N-(2-Cyclopentyl-2-propen-1-yl)-4-methyl-N-[(1-methyl-3-oxocyclobutyl)methyl]benzenesulfonamide	C21 H29 N O3 S	375.186	11.022	Full match	No results	No results	8039.08	19096.4	7382.86	7027.49	6871.84	7659.39	8205.37	15208.9	18460.2	15923.6	16237	6908.21	0.692794	-0.529501	0.13187	0.722222	0.503446
Com_1584_pos	N-(2-Carbamoylphenyl)-2-(2,5-dimethoxyphenyl)-4-quinolinecarboxamide	C25 H21 N3 O4	427.152	8.418	Full match	No results	No results	41950	38268.7	49296.1	58160	50219.9	53281.6	58790	46257.9	56269	65537.9	45323.9	43198.2	0.923264	-0.115185	0.424822	0.638889	0.110015
Com_1586_pos	N-(2-Aminoethyl)-3-{[1-(4-chloro-2-fluoro-3-phenoxyphenyl)propyl]amino}butanamide	C21 H27 Cl F N3 O2	407.179	7.086	Full match	No results	No results	17027.5	14598.3	14593.9	21578.5	18228.5	16145.9	12100.3	7763.79	9512.15	12668.2	7094.2	9057.5	1.75566	0.812013	0.00075231	1	0.761119
Com_1587_pos	N-(2-Acetylphenyl)formamide	C9 H9 N O2	163.063	8.87	Full match	No results	No results	178280	107439	132202	108175	165670	279964	144670	83585.6	88228.5	274266	65929.5	81632.8	1.31615	0.396324	0.215615	0.777778	0.476149
Com_1589_pos	N-(2,6-Dimethoxy-4-pyrimidinyl)-4-(5,5-dimethyl-1,3,2-dioxaborinan-2-yl)-N-methylbenzenesulfonamide	C18 H24 B N3 O6 S	421.148	6.482	Full match	No results	No results	3606.56	3242.05	3473.24	3480.24	3070.27	4001.35	3964.04	3771.24	3794	4018.21	3955.56	3667.95	0.900854	-0.150634	0.0333069	0.861111	0.141768
Com_158_pos	Typhasterol	C28 H48 O4	448.354	15.12	Full match	No results	No results	793175	755173	1.08367e+06	1.00844e+06	889686	928309	933940	452530	771242	554008	372613	420028	1.55762	0.63934	0.019187	0.861111	0.661927
Com_1590_pos	N-(2,3-Dihydro-1,4-benzodioxin-6-yl)-2-(3,4-dimethylphenyl)-1-oxo-1,2-dihydro-4-isoquinolinecarboxamide	C26 H22 N2 O4	426.156	5.825	Full match	No results	No results	11739.4	8140.71	11724.3	9161.55	8917.94	8224.83	18892.7	18983.6	11190.7	26970.4	21180.8	11669.4	0.531821	-0.910988	0.00642524	0.888889	0.784106
Com_1591_pos	N-(1-Methoxy-2,2,6-trimethyl-6-pentyl-4-piperidinyl)-7-nitro-2,1,3-benzoxadiazol-4-amine	C20 H31 N5 O4	405.236	8.544	Full match	No results	No results	83828.7	76630.1	82538.4	73121.1	78817.9	81059.6	111072	70595.6	92108.2	80904.4	31283.2	38456.9	1.12152	0.165454	0.356245	0.583333	0.320423
Com_1592_pos	N-(17-Amino-3,6,9,12,15-pentaoxaheptadec-1-yl)-3-(6-{[4-(trifluoromethoxy)phenyl]amino}-4-pyrimidinyl)benzamide	C30 H38 F3 N5 O7	637.275	10.257	Full match	No results	No results	1709.59	1435.86	1539.84	1502.77	1370.5	1618.61	1970.16	1793.35	1703.03	1755.41	1732.62	1858.01	0.848748	-0.236592	0.00242143	0.972222	0.21763
Com_1593_pos	N-(15-Benzyl-10-sec-butyl-3,7,13,13-tetramethyl-2,5,9,12,14-pentaoxo-1,4,8,11-tetraoxacyclopentadecan-6-yl)benzamide	C33 H39 N O10	609.256	8.749	Full match	No results	No results	10882.6	5763.78	7138.94	10103.8	10665.3	10566.7	7133.77	6282.29	6421.17	6754.39	6973.84	6392.19	1.37949	0.464131	0.0416571	0.833333	0.389471
Com_1594_pos	N-(1,3-Benzothiazol-2-yl)-2,2-diphenylacetamide	C21 H16 N2 O S	344.098	8.505	Full match	Invalid mass	No results	118340	156649	124692	150438	98983	107757	145681	99058.6	90207.5	93612.4	104732	90972.6	1.2124	0.277868	0.0941208	0.833333	0.254401
Com_1595_pos	N-({3-Oxo-2-[(2E)-2-penten-1-yl]cyclopentyl}acetyl)glutamine	C17 H26 N2 O5	338.183	6.598	Full match	No results	No results	37697.8	25058.4	32841.3	24012.9	27380.8	32821.5	49024.4	46169.5	35082.4	43594.3	29905.1	34307.3	0.755252	-0.40497	0.0276578	0.861111	0.366557
Com_1598_pos	Myxopyronin B	C24 H33 N O6	431.23	12.579	Full match	Invalid mass	No results	1.03431e+06	398669	806289	783642	452674	1.41296e+06	1.95002e+06	656917	1.25253e+06	2.70004e+06	732393	1.31684e+06	0.567859	-0.816396	0.101796	0.722222	0.71605
Com_1599_pos	myrtine	C10 H17 N O	167.131	8.184	Full match	No results	No results	94776.3	80400.8	107188	74648.9	64267.2	107783	158660	93352.8	99750.8	99786.8	71627.9	100960	0.847672	-0.238422	0.280588	0.611111	0.217279
Com_15_pos	zopiclone	C17 H17 Cl N6 O3	388.104	10.612	Full match	No results	No results	14562.8	12150.6	13220.4	19306	9357.25	12242.7	50269.3	32027.4	53687.1	35881.7	15237.7	37377.2	0.360119	-1.47345	0.00185325	0.972222	1.28226
Com_1602_pos	Myristicin	C11 H12 O3	192.078	11.944	Full match	No results	No results	14707.8	10628.7	10231.5	11681.5	9431.67	11935.2	17286.7	8775.98	10494.3	12615.3	8610.5	12473.5	0.97666	-0.0340721	0.973816	0.5	0.046982
Com_1605_pos	Myristamide	C14 H29 N O	227.224	14.261	Full match	No results	No results	1.24255e+07	1.0723e+07	1.08119e+07	9.64762e+06	1.00102e+07	1.24578e+07	1.25216e+07	9.18673e+06	8.7399e+06	1.24788e+07	1.52104e+07	1.03489e+07	0.964805	-0.05169	0.828539	0.555556	0.0587637
Com_1607_pos	Mycalolide B	C52 H74 N4 O17	1026.51	12.661	Full match	No results	No results	2.44386e+06	2.48554e+06	2.65139e+06	1.95166e+06	2.3722e+06	1.94959e+06	1.3145e+07	9.13332e+06	1.24119e+07	1.21793e+07	8.66294e+06	1.44269e+07	0.198033	-2.33619	1.16731e-07	1	2.11494
Com_1608_pos	Mycalamide A	C24 H41 N O10	503.272	11.588	Full match	No results	No results	5276.68	4179.09	4357.98	5560.47	3030.5	4631.07	11825.3	11594.7	26463.4	9488.96	3419.09	8538.43	0.379025	-1.39964	0.0277377	0.861111	1.08411
Com_160_pos	tutin	C15 H18 O6	294.11	10.547	Full match	No results	No results	55164.3	72305.7	57873.2	62191	16498.1	44444.6	62429.1	169082	82940.1	48182.5	43926.4	60798.9	0.660042	-0.59937	0.211738	0.666667	0.520092
Com_1610_pos	muramic acid	C9 H17 N O7	251.1	1.198	Full match	No results	No results	162754	153042	190095	200574	167205	144763	178454	153255	182357	137733	125145	165992	1.08007	0.11112	0.341164	0.638889	0.118068
Com_1611_pos	multiplolide A	C10 H14 O5	214.084	12.328	Full match	Invalid mass	No results	273966	234026	278928	296796	256952	246672	186583	267683	211096	160255	222793	187163	1.2847	0.36143	0.0135055	0.916667	0.344512
Com_1612_pos	mugineic acid	C12 H20 N2 O8	320.122	9.537	Full match	No results	No results	269660	245496	218603	187611	210875	267558	138375	127808	81177.7	114727	169016	130846	1.83714	0.877458	0.000624098	1	0.821005
Com_1617_pos	Morphine 6-beta-D-glucopyranosiduronide	C23 H27 N O9	461.168	7.349	Full match	No results	No results	113182	69528.4	48777.9	33492.5	111086	33942.2	53735.4	506269	33583.6	39014.7	236923	312639	0.34683	-1.5277	0.250262	0.666667	0.94855
Com_161_pos	tubiferal A	C30 H42 O5	482.302	12.56	Full match	No results	No results	643093	646659	825638	825321	893019	454555	407198	792431	544109	270125	678450	640540	1.28667	0.363642	0.170133	0.777778	0.38244
Com_1620_pos	moroxydine	C6 H13 N5 O	171.113	12.385	Full match	No results	No results	85289.3	76325.1	80458	97217	61264.1	71920.6	63613.4	84733.9	69641.7	53036.6	56152.2	60050.9	1.22014	0.287049	0.0582777	0.833333	0.264446
Com_1622_pos	Monuron	C9 H11 Cl N2 O	198.056	1.757	Full match	Invalid mass	No results	1.45054e+06	1.67406e+06	2.05751e+06	1.02852e+06	1.38294e+06	1.35082e+06	1.6254e+06	1.7589e+06	1.17893e+06	2.2483e+06	1.09131e+06	2.10051e+06	0.894139	-0.161428	0.534866	0.638889	0.170143
Com_1624_pos	Montiporyne A	C15 H20 O	216.151	7.798	Full match	Invalid mass	No results	13139.1	9055.58	12781.9	14053.1	10502.4	12345.2	14436	11183.1	10592.7	13631	12017	12184	0.970741	-0.0428411	0.682213	0.472222	0.0456583
Com_1625_pos	Monoxerutin	C29 H34 O17	654.182	7.767	Full match	No results	No results	4224.44	3781.79	3837.68	3987.21	3788.58	4069.06	4653.7	4104.74	7425.39	4598.01	4226.71	4070.37	0.814637	-0.29577	0.109136	0.944444	0.241112
Com_1626_pos	monotropein	C16 H22 O11	390.115	8.318	Full match	No results	No results	23754	34557.9	38022.3	33208.4	32973.8	32900.4	24803.3	22530.1	32422.1	16711	12643.3	22781.7	1.48165	0.567204	0.0233804	0.944444	0.57846
Com_1627_pos	monodechloroaminopyrrolnitrin	C10 H9 Cl N2	192.045	1.665	Full match	Invalid mass	No results	38010.6	34407.5	31596.8	53485.2	49173.7	46722.5	31101.7	18685.8	32987.6	30381	25285.4	32634.4	1.48119	0.566758	0.0103243	0.944444	0.518213
Com_1628_pos	Monocerin	C16 H20 O6	308.125	9.595	Full match	No results	No results	11460.4	10367.3	11944.6	12227.6	10224.6	10127.4	16882.7	11397.1	11628.8	12047.8	10746.5	15125.2	0.852545	-0.230151	0.108699	0.75	0.19799
Com_1629_pos	Monobutyl phthalate	C12 H14 O4	222.089	10.61	Partial match	Full match	No results	255235	295125	380534	419961	300742	351337	306728	213839	287272	219480	279675	386054	1.18304	0.242493	0.16859	0.722222	0.231475
Com_1633_pos	Monobenzone	C13 H12 O2	200.083	9.731	Full match	No results	No results	14123.6	12535.1	14615.6	11879.9	9678.55	12749.9	14016.1	11952.4	14084.9	15576	10468.2	10792.2	0.982998	-0.0247392	0.868917	0.5	0.0598242
Com_1634_pos	moniliformin	C4 H2 O3	98.0002	0.076	Full match	No results	No results	5492.27	10809	13080.5	18439.7	80389.5	41040	6755.61	16741.8	14143.4	35279	17007.3	36509.9	1.33862	0.420745	0.918222	0.5	0.0891779
Com_1635_pos	Mometasone furoate	C27 H30 Cl2 O6	520.142	12.251	Full match	No results	No results	95836.2	137076	266342	100748	161339	152974	427443	543071	579997	374014	286336	474737	0.340451	-1.55448	0.000206618	1	1.46493
Com_1636_pos	MOM	C45 H71 N O17	897.475	14.19	Full match	No results	No results	48235.7	50124.1	74606.4	102187	77648.4	63110.2	64716.4	95742	79677.6	83391.3	108594	97411	0.785431	-0.348443	0.0927054	0.805556	0.349228
Com_1637_pos	molassamide	C48 H66 N8 O13	962.476	12.223	Full match	No results	No results	98059.7	84243.4	91001.3	85746	100271	92366.8	73831.5	44000.1	64763.6	69149.7	60379.3	90088.8	1.37163	0.455893	0.0165637	0.944444	0.447154
Com_1638_pos	Mofezolac	C19 H17 N O5	339.11	8.711	Full match	No results	No results	30213.3	29559.7	30302	22139	19043.5	22356.8	27482.1	23222.5	25772.2	28234.7	46675.4	90035.7	0.636288	-0.652249	0.181958	0.666667	0.447485
Com_163_pos	Tsar	C10 H20 N O4 P S	281.086	8.484	Full match	Invalid mass	No results	14808	10405.1	12438	9033.22	18150.4	10377.2	17564.8	16686.5	15086.1	9553.94	14916.6	25107.1	0.760369	-0.395229	0.144446	0.75	0.345961
Com_1640_pos	modiolide A	C10 H14 O4	198.089	12.57	Full match	Invalid mass	No results	37068.9	21503.6	35830.2	42087.2	33356.8	27472.7	26204.3	34402.9	31894.8	27254.7	30485	23611.3	1.13498	0.182664	0.356067	0.722222	0.14915
Com_1641_pos	Mitratapide	C36 H41 Cl N8 O4 S	716.264	13.414	Full match	Invalid mass	No results	729580	767700	705547	367375	702211	323098	409510	546006	450282	327272	415182	728833	1.24971	0.321588	0.332448	0.638889	0.266025
Com_1644_pos	Mitoxantrone	C22 H28 N4 O6	444.202	13.919	Full match	No results	No results	21165.9	16603.7	11192.7	6750.61	11079.8	14918.3	74247.9	54960.5	65346.9	38635.7	41301.7	58613.1	0.2453	-2.02738	5.13528e-05	1	1.89362
Com_1645_pos	Mirabegron	C21 H24 N4 O2 S	396.162	10.54	Full match	No results	No results	13071.9	10198.1	9873.67	9500.94	11308	9236.8	15058.3	228511	158001	58493	10099.9	98617.4	0.111096	-3.17012	0.0224087	0.916667	2.21618
Com_1646_pos	Miproxifene phosphate	C29 H36 N O5 P	509.231	11.278	Full match	No results	No results	11503.3	10634.6	14262.3	15923.1	12085.7	16278.8	45678.1	50815.7	99319.3	37940.6	13217.3	61859.1	0.261269	-1.93639	0.00635134	0.916667	1.58224
Com_1647_pos	Minoxidil	C9 H15 N5 O	209.128	12.738	Full match	No results	No results	20610	14573.7	18879.1	17198.3	18459.4	21954.5	23145.7	25530.3	25325.2	18190	16459.7	21072.1	0.860873	-0.216128	0.15482	0.722222	0.192136
Com_1649_pos	Minocycline	C23 H27 N3 O7	457.184	8.305	Full match	No results	No results	24629.6	26535.8	26834.4	42346.5	38496.7	36149.4	6457.37	5936.26	5637.44	5692.35	8887.31	5339.26	5.13814	2.36125	1.426e-07	1	2.14244
Com_164_pos	Tryptophol	C10 H11 N O	161.084	8.705	Full match	Invalid mass	No results	1.02954e+06	901771	1.12174e+06	1.20294e+06	822505	944855	1.03093e+06	1.08888e+06	659587	1.19542e+06	2.16819e+06	1.48062e+06	0.790089	-0.339912	0.337015	0.694444	0.270901
Com_1650_pos	Milbemycin A3	C31 H44 O7	528.309	12.427	Full match	No results	No results	23135.9	28893.1	33766.1	34326.9	24516.6	42118	30243.6	37424.3	33956.4	24163.1	33162.9	33080.2	0.972536	-0.0401766	0.724625	0.527778	0.0581305
Com_1651_pos	Miglitol	C8 H17 N O5	207.11	7.273	Full match	No results	No results	189722	265876	285088	271863	276416	186154	105706	150347	170753	143799	143812	295280	1.46095	0.546908	0.0319266	0.833333	0.550852
Com_1652_pos	Mifepristone	C29 H35 N O2	429.267	15.677	Full match	No results	No results	479190	674738	806371	884002	750108	582279	855755	1.01563e+06	1.25249e+06	826233	647933	915631	0.757514	-0.400655	0.0559652	0.833333	0.372827
Com_1653_pos	Midostaurin	C35 H30 N4 O4	570.228	8.231	Full match	No results	No results	24118.4	11008	19068.4	21367.7	16022.8	18575	8309.49	10257.2	6150.66	6563.44	5838.39	6343.74	2.53458	1.34175	9.09537e-05	1	1.21168
Com_1655_pos	microsclerodermin A	C47 H62 N8 O16	994.428	11.768	Full match	No results	No results	113697	183050	213168	153995	139833	76159	127528	197045	124191	56862.4	94931.5	205597	1.09148	0.126285	0.62721	0.583333	0.169856
Com_1656_pos	Micronomicin	C20 H41 N5 O7	463.3	12.955	Full match	No results	No results	884162	814171	1.13491e+06	954041	904863	943979	1.05803e+06	2.03075e+06	2.21195e+06	1.60036e+06	1.36316e+06	2.25873e+06	0.535602	-0.900766	0.00359174	0.972222	0.78009
Com_1658_pos	microcin SF608	C32 H44 N6 O6	608.331	13.741	Full match	No results	No results	15896.8	14768	16999.4	15693.2	16600.9	14479.2	16299.3	15026.2	16451.9	14448.1	12654.8	28047.4	0.917512	-0.124201	0.664308	0.555556	0.0910885
Com_165_pos	Tryptamine	C10 H12 N2	160.1	6.497	Full match	No results	No results	81032.9	85170.8	74777.1	130100	71291.6	59048.2	95895.1	156450	151855	67459.3	135251	144189	0.667582	-0.582983	0.0482555	0.833333	0.526308
Com_1661_pos	Michelalbine	C17 H15 N O3	281.105	8.543	Full match	Invalid mass	No results	790588	400916	117848	171677	230775	171442	199519	412682	81404.7	103295	227955	494610	1.23941	0.309657	0.640862	0.444444	0.344246
Com_1663_pos	MHPG	C9 H12 O4	184.073	9.709	Full match	No results	No results	134381	150377	196690	255912	196788	272864	395919	317987	240160	144848	214759	242027	0.775865	-0.366122	0.219733	0.694444	0.313312
Com_1666_pos	Mezerein	C38 H38 O10	654.25	9.164	Full match	No results	No results	46893.5	32349.4	38778.1	38236.9	45823.6	57317.3	56021.5	29292.1	38982.8	77981.1	27991.8	41391.7	0.954862	-0.0666365	0.984298	0.527778	0.110744
Com_1667_pos	Mexoryl SX	C28 H34 O8 S2	562.168	8.918	Full match	No results	No results	363013	449206	399075	382634	413927	404188	389939	378209	308327	323672	224965	330688	1.23328	0.302497	0.0386664	0.916667	0.300747
Com_1668_pos	Mexiletine	C11 H17 N O	179.131	8.183	Full match	No results	No results	7855.3	6699.92	6886.9	6865.45	6562.79	7234.45	8555.9	6686.14	7482.66	7401.03	7989.94	7475.25	0.923535	-0.114762	0.0988738	0.777778	0.103787
Com_1669_pos	mexazolam	C18 H16 Cl2 N2 O2	362.06	6.558	Full match	No results	No results	302215	189630	294980	252941	106048	362597	32153.8	41549.4	31926.8	69570.7	31780.3	21847.6	6.59188	2.72069	1.59916e-05	1	2.47347
Com_1670_pos	Metynodiol Diacetate	C25 H34 O4	398.245	12.315	Full match	No results	No results	839700	1.04003e+06	956556	729638	705264	690046	447925	667339	516616	383323	539324	497760	1.62542	0.700809	0.000824243	1	0.641027
Com_1672_pos	Metoprolol	C15 H25 N O3	267.183	11.107	Full match	No results	No results	352600	893623	490351	582567	768397	325775	28463.7	95011.5	58294.8	88444.7	121997	231856	5.46946	2.4514	0.000582678	1	2.39894
Com_1673_pos	metominostrobin	C16 H16 N2 O3	284.116	14.046	Full match	No results	No results	162020	120686	130983	171939	138466	140457	64097.5	64862.7	22957.5	45268.9	118733	111871	2.02097	1.01505	0.0193707	1	1.10791
Com_1674_pos	METOFLUTHRIN, CIS-(E)-	C18 H20 F4 O3	360.135	8.097	Full match	Invalid mass	No results	176417	273805	259334	311644	218213	399144	15344	68083.5	33176.4	31959.6	77339.9	62012.5	5.69109	2.50871	0.000286257	1	2.42616
Com_1675_pos	Metitepine	C20 H24 N2 S2	356.137	8.242	Full match	No results	No results	15204.7	11397.5	11796.5	10337.7	13309	23656.9	13199.1	7714.73	13402.1	17003.4	8423.7	10352.6	1.22265	0.290009	0.280068	0.638889	0.277073
Com_1676_pos	Metirosine	C10 H13 N O3	195.089	8.142	Full match	No results	No results	13766	8988.4	90670.7	11750.5	102088	10048.1	11393.9	99731.1	10684.8	11206.6	7723.62	10530	1.56879	0.649654	0.503491	0.638889	0.579548
Com_167_pos	Trp-Ala	C14 H17 N3 O3	275.126	7.05	Full match	No results	No results	46660.8	59598.5	55099.8	65319.8	47911.3	34727.2	5617.14	4938.5	6510.94	5462.05	10273	6753.22	7.81997	2.96716	5.12341e-08	1	2.71638
Com_1680_pos	METIPRANOLOL	C17 H27 N O4	309.193	8.089	Full match	No results	No results	51361.4	57596.2	6752.05	21115.1	36144.8	7523.84	20666	23786.4	10588.5	14532.5	7237.77	7271.6	2.14662	1.10206	0.237841	0.694444	0.737064
Com_1684_pos	methyprylon	C10 H17 N O2	183.126	8.776	Full match	No results	No results	3368.09	1737.08	2722.05	2720.42	1639.36	3406.57	2600.72	7806.74	4254.88	2674.29	3092.46	3580.24	0.64948	-0.622644	0.0953521	0.722222	0.522997
Com_1687_pos	methylpropiolate	C4 H4 O2	84.021	1.311	Full match	Invalid mass	No results	1.22687e+07	1.48927e+07	1.44923e+07	1.40396e+07	1.42181e+07	1.39806e+07	1.97229e+07	1.86432e+07	1.44405e+07	1.72919e+07	1.37902e+07	1.45246e+07	0.852446	-0.230319	0.0593247	0.777778	0.200975
Com_168_pos	Troxipide	C15 H22 N2 O4	294.157	7.053	Full match	Invalid mass	No results	458943	557301	821941	426373	848922	387564	2.65854e+06	1.98434e+06	1.89844e+06	2.57752e+06	796930	2.40331e+06	0.284197	-1.81504	0.000402997	0.944444	1.63775
Com_1697_pos	Methylphosphonic acid	C H5 O3 P	95.9975	0.556	Full match	No results	No results	2699.67	2499.57	2890.09	3757.12	2886.61	2743.31	3408.62	3255.14	3812.95	3972.76	2823.42	3339.54	0.847857	-0.238107	0.0515038	0.833333	0.222398
Com_1699_pos	Methylphloroglucinol	C7 H8 O3	140.047	13.394	Full match	Invalid mass	No results	749504	788084	936324	1.1975e+06	1.17156e+06	852665	1.1469e+06	1.23481e+06	1.26072e+06	1.24205e+06	1.1988e+06	1.18439e+06	0.783696	-0.351633	0.0234734	0.916667	0.341702
Com_16_pos	Ziprasidone	C21 H21 Cl N4 O S	412.113	11.003	Full match	No results	No results	125327	140186	170833	152151	417401	158155	70965.6	95998.9	52577	88567.2	137542	131841	2.01571	1.01129	0.018047	0.944444	0.867865
Com_1701_pos	Methylphenidate	C14 H19 N O2	233.141	8.749	Full match	No results	No results	2604.49	2725.94	1942.71	1900.45	2205.45	2088.95	2286.34	1957.8	2057.95	2142.34	2203.01	2048.67	1.0608	0.0851482	0.466858	0.555556	0.0674144
Com_1702_pos	METHYLPHENANTHRENE	C15 H12	192.094	13.011	Full match	Invalid mass	No results	424910	477828	378445	428995	355487	520829	440350	400484	520842	434338	436029	410016	0.978969	-0.030665	0.715659	0.611111	0.0345209
Com_1707_pos	Methylenesuccinate	C5 H4 O4	128.013	1.044	Full match	Invalid mass	No results	1.09681e+06	992733	1.21618e+06	1.21289e+06	957866	1.0739e+06	1.24533e+06	1.16776e+06	1.20011e+06	1.18912e+06	947369	1.08693e+06	0.958132	-0.0617038	0.470971	0.583333	0.0666645
Com_1711_pos	methylbenzoate	C8 H8 O2	136.052	1.356	Full match	Invalid mass	No results	373805	289114	381266	297672	330921	282879	611663	414904	459107	644470	549997	420039	0.630821	-0.664698	0.00108181	1	0.594712
Com_1714_pos	Methyl vinyl ketone	C4 H6 O	70.0418	12.344	Full match	No results	No results	1.98751e+06	1.78583e+06	1.94976e+06	1.33435e+06	1.79745e+06	623585	1.12124e+06	1.78791e+06	1.44837e+06	1.11435e+06	1.29065e+06	1.39802e+06	1.1615	0.215993	0.642089	0.722222	0.127387
Com_1720_pos	Methyl palmitate	C17 H34 O2	270.255	14.314	Full match	Invalid mass	No results	166999	100778	156407	153244	167047	124110	24975.7	38592.1	25959	28932.2	44142.6	28043.4	4.55603	2.18778	3.00047e-07	1	2.00232
Com_1721_pos	Methyl N~2~-[(benzyloxy)carbonyl]-N~6~-{[(2-methyl-2-propanyl)oxy]carbonyl}-L-lysyl-D-alanyl-N~6~-{[(2-methyl-2-propanyl)oxy]carbonyl}-L-lysyl-D-alaninate	C37 H60 N6 O11	764.43	14.52	Full match	Invalid mass	No results	1.28256e+06	1.49498e+06	1.12511e+06	1.26506e+06	1.80772e+06	1.85122e+06	429431	1.0923e+06	1.00212e+06	171740	653958	431256	2.33459	1.22317	0.0143132	1	1.31554
Com_1724_pos	Methyl N~2~-[(2R)-2-{[(2S)-2-hydroxy-3-methylbutanoyl]oxy}-3-methylbutanoyl]-N~2~-methyl-L-glutaminylisoleucyl-L-alanyl-N-methyl-D-phenylalanyl-L-prolinate	C41 H64 N6 O11	816.462	14.555	Full match	No results	No results	181279	279744	231267	245385	249975	347196	201070	477770	656686	645426	420441	335236	0.560853	-0.834305	0.0352963	0.833333	0.686517
Com_1728_pos	Methyl N-{[(2-methyl-2-propanyl)oxy]carbonyl}alanylglycinate	C11 H20 N2 O5	260.137	5.931	Full match	No results	No results	809001	812983	719291	967021	694692	663009	79180.5	99253.7	71039.9	71035.1	142724	102967	8.24089	3.0428	3.01576e-07	1	2.80329
Com_1729_pos	Methyl N-(2-azido-2-methylpropanoyl)-2-methylalanyl-2-methylalanyl-2-methylalanyl-2-methylalanyl-2-methylalanyl-2-methylalanyl-2-methylalanyl-2-methylalanyl-2-methylalanyl-2-methyl(3-~13~C)alaninate	C44 [13]C H79 N13 O12	994.6	13.003	Full match	No results	No results	677022	495260	569458	643782	459029	531405	520013	507911	448609	435768	537567	339986	1.21008	0.275107	0.0644357	0.805556	0.257784
Com_172_pos	Tropinone	C8 H13 N O	139.1	1.332	Full match	Full match	No results	135338	73137.4	47878	58886.2	47394.7	91356	91509.6	208121	117635	86822	143918	121279	0.590146	-0.760856	0.0265106	0.861111	0.753901
Com_1730_pos	Methyl Jasmonate	C13 H20 O3	224.141	13.221	Full match	No results	No results	14257.1	21736.1	17904.6	19403.3	15520.4	14479.9	17912.6	11918	15046.5	12158.2	20106.5	15677.4	1.11293	0.154365	0.329606	0.611111	0.149617
Com_1733_pos	methyl indole-3-acetate	C11 H11 N O2	189.079	6.723	Full match	No results	No results	457738	288707	159780	380396	388087	696258	188058	63919.3	183821	173293	97453.2	152609	2.75965	1.46449	0.00425494	0.916667	1.30388
Com_1739_pos	Methyl cinnamate	C10 H10 O2	162.068	8.711	Not the top hit	Full match	No results	288037	249781	215528	164394	231765	187462	296757	290769	210220	302204	140435	152867	0.959602	-0.0594925	0.95232	0.555556	0.0765542
Com_173_pos	Tropine	C8 H15 N O	141.115	1.328	Full match	Full match	No results	3.27838e+06	3.14953e+06	666658	2.31058e+06	1.69505e+06	991500	277284	115083	443057	271022	485384	633954	5.43255	2.44163	0.000945264	1	2.19682
Com_1743_pos	Methyl alpha-aspartylphenylalaninate	C14 H18 N2 O5	294.121	5.268	Full match	No results	No results	50185.3	47274.9	46072.7	76779.3	53920.1	39574.9	20287.4	12192.3	11523.1	9042.73	18352.5	8177.97	3.94349	1.97947	3.57839e-05	1	1.84902
Com_1747_pos	Methyl acetoxy{(2R,3R,8R,9R,10R,11R,12R,13S,17S)-9,10,17-triacetoxy-8-[(S)-acetoxy(3-furyl)methyl]-1,11,16-trihydroxy-5-isopropyl-8,12,14-trimethyl-4,18-dioxahexacyclo[12.2.1.1~2,5~.0~3,7~.0~3,11~.0~12,16~]octadec-13-yl}acetate	C40 H52 O18	820.315	9.633	Full match	No results	No results	44385.9	30521.8	43974.6	23302.7	29738.8	96268.2	25232.7	29398.5	19555.6	178445	10466.3	11098.5	0.9781	-0.0319457	0.388793	0.777778	0.610054
Com_174_pos	tritoniopsin A	C24 H38 O5	406.273	10.636	Full match	Invalid mass	No results	13837.2	13278.7	16957.6	18233.5	13265.4	15700.1	16532.6	16982.7	15783.1	16598.1	15709.7	16210.8	0.933094	-0.099906	0.229035	0.694444	0.100636
Com_1752_pos	Methyl 5-oxo-1-cyclopentene-1-carboxylate	C7 H8 O3	140.047	12.956	Full match	Invalid mass	No results	1.77482e+06	1.71874e+06	1.29808e+06	2.10713e+06	2.51216e+06	1.06639e+06	1.90664e+06	2.59155e+06	2.52257e+06	2.32489e+06	2.15654e+06	4.86811e+06	0.64002	-0.64381	0.0406285	0.888889	0.571947
Com_1753_pos	Methyl 5-oxo-10-[2-oxo-2-(8-quinolinylamino)ethyl]-4-azabicyclo[9.2.2]pentadeca-1(13),11,14-triene-3-carboxylate	C27 H29 N3 O4	459.218	10.342	Full match	No results	No results	55324.8	46445.6	53276.7	55323.3	50146.1	59975.8	285501	222997	294848	282181	78562.7	178651	0.238685	-2.06682	0.00110001	1	1.77693
Com_1754_pos	Methyl 5-methyl-3-(1H-naphtho[1,8-de][1,3,2]diazaborinin-2(3H)-yl)-4-hexenoate	C18 H21 B N2 O2	308.17	10.255	Full match	No results	No results	136715	85451.3	77447.6	73356.3	59705.2	103482	12789.4	11621.5	12749.9	12859	17072.8	12055	6.77415	2.76004	1.5651e-06	1	2.47745
Com_1756_pos	Methyl 4-amino-2-(2,3-dihydroxy-3-methylbutyl)benzoate	C13 H19 N O4	253.131	5.552	Full match	Invalid mass	No results	333145	76545.8	72163.7	119570	177246	204370	250999	27680.1	70552.8	338385	50679.8	23024.1	1.29123	0.368746	0.267532	0.694444	0.825463
Com_1757_pos	Methyl 4-[3-(trifluoromethyl)cyclohexyl]benzoate	C15 H17 F3 O2	286.117	10.331	Full match	Invalid mass	No results	540094	515644	238826	224740	494031	127111	512611	530717	774743	563711	385853	447067	0.66583	-0.586774	0.0914506	0.75	0.676811
Com_1758_pos	Methyl 4-[(3-{[3-(4-morpholinyl)phenoxy]methyl}benzyl)oxy]benzoate	C26 H27 N O5	433.187	9.743	Full match	No results	No results	7056.93	6427.69	10130	8520.45	6955.88	6591.27	22528.5	14848.9	14821	17806.2	19365.6	19380.9	0.420062	-1.25133	5.19063e-06	1	1.14295
Com_1759_pos	Methyl 4-(cyclohexylcarbamoyl)benzoate	C15 H19 N O3	261.136	7.692	Full match	No results	No results	60463.5	92963.9	9520.99	35561	48903.7	10492.7	12012.6	17542.7	8957.97	11261.4	10167.3	13700	3.50215	1.80824	0.0534933	0.75	1.27298
Com_1760_pos	Methyl 4-(4-{2-[(2-{2-[(6-chlorohexyl)oxy]ethoxy}ethyl)amino]-2-oxoethoxy}benzoyl)benzoate	C27 H34 Cl N O7	519.2	11.037	Full match	No results	No results	61995	48952.7	134620	433067	58322.8	116358	352573	31110	220490	114539	14650.5	15319.6	1.13976	0.188726	0.471431	0.638889	0.758285
Com_1761_pos	Methyl 4-(2-fluoropropyl)benzoate	C11 H13 F O2	196.09	11.499	Full match	No results	No results	11714.7	8523.16	4990.81	10502.2	7883.92	10497.7	11061.2	11052.3	12015	13190.8	6724.99	8846.53	0.86042	-0.216887	0.336108	0.722222	0.214415
Com_1762_pos	Methyl 4-(2-benzylbenzoyl)-2,5-dimethyl-1H-pyrrole-3-carboxylate	C22 H21 N O3	347.151	6.181	Full match	No results	No results	62890.7	45101.7	46409.4	70387.8	40933	64812.9	4701.95	4341.85	4267.13	4724.53	4813.93	4234.51	12.2041	3.6093	4.43083e-07	1	3.26164
Com_1764_pos	Methyl 3-oxochola-1,4-dien-24-oate	C25 H36 O3	384.265	13.082	Full match	Invalid mass	No results	1.52158e+07	2.18417e+07	2.66096e+07	2.23145e+07	1.99714e+07	2.42062e+07	2.05322e+07	1.92543e+07	1.98496e+07	1.85928e+07	1.81904e+07	1.99674e+07	1.11833	0.161351	0.274883	0.805556	0.137493
Com_1765_pos	Methyl 3-methyl-7-oxo-4,5,6,7,8,9-hexahydro-1H-benzo[7]annulene-2-carboxylate	C14 H18 O3	234.125	10.051	Full match	Invalid mass	No results	36562.2	33913.4	30347.8	32571.6	27321.6	29451.2	23419.9	24123.6	24047.7	30738.9	18254.2	20064.9	1.35207	0.435171	0.00627167	0.916667	0.41122
Com_1766_pos	Methyl 3-methyl-2-{[(4-methylphenyl)sulfonyl]amino}-3-butenoate	C13 H17 N O4 S	283.087	9.223	Full match	Invalid mass	No results	345180	97410.3	216369	39938.5	139304	119126	79277.6	69844.7	34262.8	106841	26665.7	24526.5	2.80397	1.48747	0.0321371	0.888889	1.30604
Com_1768_pos	Methyl 3-anilino-2-(1,7-dimethyl-1H-indol-3-yl)-2,3-diphenylpropanoate	C32 H30 N2 O2	474.232	7.956	Full match	No results	No results	70732.3	44593.1	46728.6	58304.5	67543.2	45156	9306.24	6105.51	6135.53	11151.7	6503.04	6107.24	7.35077	2.8779	7.68368e-08	1	2.63953
Com_1769_pos	Methyl 3-{4-[(5E)-7-hydroxy-6-methyl-5-hepten-2-yl]-3a,6a-dimethyl-10-methylene-9-oxododecahydro-1H-cyclopenta[7,8]cyclopropa[4,4a]naphtho[2,3-b]furan-10b(2H)-yl}propanoate	C31 H46 O5	498.334	13.534	Full match	No results	No results	100879	67183.1	87200.8	98415.4	72984.3	49424.2	113840	150302	276974	236902	97563.2	183892	0.449362	-1.15405	0.0044765	0.944444	1.00411
Com_1771_pos	Methyl 3-{2-hydroxy-4-methoxy-5-[(1R,2R,5R)-5-methyl-4-oxo-3,6-dioxabicyclo[3.1.0]hex-2-yl]phenyl}propanoate	C16 H18 O7	322.104	10.286	Full match	Invalid mass	No results	141596	251528	349269	232643	293840	142214	62833.1	88070.7	52107.8	54329.6	60811.2	72611.1	3.61111	1.85244	0.000123697	1	1.63837
Com_1775_pos	Methyl 3-[3-(diethoxymethyl)phenyl]-3-(1H-naphtho[1,8-de][1,3,2]diazaborinin-2(3H)-yl)propanoate	C25 H29 B N2 O4	432.221	7.549	Full match	No results	No results	212781	153895	176455	231295	193560	221125	6440.62	10411.1	5756.81	6530.33	18037.5	5902.27	22.4028	4.48561	2.62061e-06	1	4.20111
Com_1777_pos	Methyl 3-[3-(2-azidoethyl)-3H-diaziren-3-yl]-N-{[(2-methyl-2-propanyl)oxy]carbonyl}alaninate	C12 H20 N6 O4	312.154	9.913	Full match	No results	No results	159633	80381.7	142109	133280	147314	92646.2	26381.2	38243	41943	25492	25920.3	26565.2	4.09311	2.0332	3.2601e-06	1	1.84217
Com_1779_pos	Methyl 3-[(2R,3R)-6-[(3-isopropenyl-2,2-dimethylcyclobutyl)methyl]-5-methoxy-2,3-dimethyl-6-(3-methyl-2-buten-1-yl)-4,7-dioxo-3,4,6,7-tetrahydro-2H-chromen-8-yl]hexanoate	C34 H50 O6	554.359	13.894	Full match	No results	No results	33171.4	21364.9	26810.6	26851.4	28504.1	28389.8	25980.5	44323.3	84113.4	93176.6	41853.9	64250.6	0.46676	-1.09925	0.0168168	0.861111	0.893607
Com_177_pos	Tris(2-butoxyethyl) phosphate	C18 H39 O7 P	398.245	11.508	Full match	No results	No results	8800.01	10196.8	8983.01	9295.16	9659.18	9774.1	13380.5	11452.8	8280.4	8572.37	8152.15	7522.71	0.98862	-0.016512	0.922049	0.666667	0.013724
Com_1780_pos	Methyl 3-(isobutyryloxy)-2-{[(2-pyridinylcarbonyl)amino]methyl}benzoate	C19 H20 N2 O5	356.136	8.968	Full match	No results	No results	51964	38902.6	45310.4	65973.8	59692.2	93035.9	152073	13958.6	39756.2	34743.9	8427.59	8661.54	1.37752	0.462076	0.126952	0.805556	1.14382
Com_1784_pos	Methyl 3-(2-{[(4-methylphenyl)sulfonyl]amino}-1,2,3,4-tetrahydro-1-isoquinolinyl)-3-phenylpropanoate	C26 H28 N2 O4 S	464.179	10.403	Full match	No results	No results	149514	156796	140219	143874	96208.3	123037	195511	123165	153807	209674	279805	214356	0.68829	-0.538911	0.0320284	0.861111	0.46825
Com_1785_pos	Methyl 3-(1H-naphtho[1,8-de][1,3,2]diazaborinin-2(3H)-yl)-4-phenyl-4-pentenoate	C22 H21 B N2 O2	356.17	10.577	Full match	No results	No results	116531	99704.1	49287.6	138530	114218	99394.4	15935.4	21383.8	28784.6	10323.5	15601.7	19159.9	5.5551	2.47381	7.44583e-06	1	2.25607
Com_1787_pos	methyl 2-acetyl-3,5-dihydroxyphenylacetate	C11 H12 O5	224.068	13.057	Full match	Invalid mass	No results	2.25522e+06	1.53477e+06	1.47449e+06	1.05642e+06	1.52422e+06	1.21404e+06	2.3117e+06	2.10356e+06	1.41156e+06	1.64395e+06	2.22256e+06	2.23308e+06	0.759589	-0.396709	0.0584455	0.777778	0.382279
Com_1789_pos	Methyl 2-{1-[5-fluoro-2-(2-methyl-2-propanyl)-1H-indol-3-yl]-2-naphthyl}hydrazinecarboxylate	C24 H24 F N3 O2	405.183	14.54	Full match	No results	No results	3068.48	2970.29	3388.94	3017.83	5673.07	5524.31	3548.08	3397.28	3425.07	3652.44	3582.29	3294.76	1.13124	0.177911	0.541956	0.638889	0.109068
Com_178_pos	Triphenylsilanol	C18 H16 O Si	276.097	7.855	Full match	No results	No results	129758	118844	121498	172309	93393.2	274077	32637	46201	19568.3	20815	35922.2	41463.4	4.62791	2.21036	3.1056e-05	1	1.9962
Com_1790_pos	Methyl 2-{1-[5-chloro-2-(2-methyl-2-propanyl)-1H-indol-3-yl]-6-methyl-2-naphthyl}hydrazinecarboxylate	C25 H26 Cl N3 O2	435.173	7.681	Full match	Invalid mass	No results	5603.78	4911	4943.25	5149.45	4911.39	6690	11234	7723.06	23412.6	11332.1	5895.97	30888.7	0.355953	-1.49024	0.0198711	0.972222	1.14938
Com_1791_pos	Methyl 2-[(E)-2-(2-naphthyl)vinyl]-2-[(trifluoromethyl)sulfanyl]-4-pentenoate	C19 H17 F3 O2 S	366.092	6.997	Full match	No results	No results	59877.5	79318.3	73254.1	67706.8	66355.4	77397.4	210895	98076.1	141543	176854	95065.5	108376	0.510236	-0.970763	0.00425742	1	0.833844
Com_1793_pos	Methyl 2-[(E)-2-(2-methylphenyl)vinyl]-2-[(trifluoromethyl)sulfanyl]-4-pentenoate	C16 H17 F3 O2 S	330.092	6.898	Full match	Invalid mass	No results	77102.1	46252.1	68215.6	75119	65083.3	59803.3	107995	98710.1	189173	118823	38496.3	66571.7	0.631809	-0.66244	0.175559	0.75	0.500093
Com_1794_pos	Methyl 2-[(E)-2-(2-fluorophenyl)vinyl]-2-[(trifluoromethyl)sulfanyl]-4-pentenoate	C15 H14 F4 O2 S	334.066	1.27	Full match	Invalid mass	No results	1.63085e+06	1.54026e+06	1.48127e+06	1.91098e+06	1.43873e+06	2.09278e+06	2.44386e+06	2.19809e+06	2.10117e+06	2.44515e+06	2.14108e+06	1.67737e+06	0.776128	-0.365633	0.0120421	0.944444	0.337112
Com_1795_pos	Methyl 2-[(4-methylbenzoyl)amino]-5,6,7,8-tetrahydro-4H-cyclohepta[b]thiophene-3-carboxylate	C19 H21 N O3 S	343.126	7.378	Full match	Invalid mass	No results	1.71724e+06	1.57449e+06	2.3432e+06	2.94936e+06	2.14969e+06	1.59863e+06	3.55494e+06	2.2739e+06	2.53445e+06	1.40215e+06	1.49926e+06	2.66389e+06	0.885417	-0.175571	0.59999	0.555556	0.14408
Com_1799_pos	Methyl 2-(allylsulfanyl)-2-[(E)-2-phenylvinyl]-4-pentenoate	C17 H20 O2 S	288.117	6.123	Full match	No results	No results	50025.5	44205.8	51307.7	55642.9	47389.8	53285.8	70940.6	43008	60013.2	61194.7	53474.8	48642.1	0.894993	-0.160051	0.250916	0.694444	0.134724
Com_1800_pos	Methyl 13-chloro-5,12-dihydroindolo[2',3':5,6]cycloocta[1,2-b]indole-6-carboxylate	C22 H15 Cl N2 O2	374.084	12.252	Full match	Invalid mass	No results	74051.8	115819	136636	109592	154411	76054.9	344918	545537	482315	321039	275687	433859	0.277348	-1.85023	1.43171e-05	1	1.69681
Com_1804_pos	Methyl 11-(6-oxabicyclo[3.1.0]hex-2-yl)undecanoate	C17 H30 O3	282.219	13.755	Full match	Invalid mass	No results	1.14818e+06	912898	1.4752e+06	1.42797e+06	1.53078e+06	1.57337e+06	895180	992351	963730	1.24022e+06	1.08327e+06	1.40902e+06	1.2255	0.293368	0.107096	0.805556	0.261385
Com_1805_pos	Methyl [1-(2-aminophenyl)-2-isopropyl-3H-benzo[e]indol-3-yl]carbamate	C23 H23 N3 O2	373.178	11.217	Full match	No results	No results	19132.3	15207.4	23419.9	18602.4	7637.49	21432.3	26427.5	34458.9	127241	37156.8	13603.1	32001.2	0.389207	-1.36139	0.0592158	0.861111	1.00428
Com_1806_pos	Methyl [(2R,4S,6R)-6-allyl-4-hydroxytetrahydro-2H-pyran-2-yl]acetate	C11 H18 O4	214.12	8.237	Full match	No results	No results	130755	155285	98453.2	169263	153587	175879	228243	120921	115239	188182	53230.6	78273	1.12643	0.17176	0.393454	0.611111	0.312689
Com_1807_pos	Methyl [(2R,3R,4R,5S,6Z,9R,15S,16S,18S,19S)-2,3,16-triacetoxy-4-[(S)-acetoxy(3-furyl)methyl]-19-(acetoxymethyl)-15-hydroxy-6-(1-hydroxypropylidene)-4,12,17-trimethyl-7-oxo-8,11,13,20-tetraoxaheptacyclo[10.7.1.1~14,17~.0~1,10~.0~5,10~.0~9,15~.0~14,19~]henicos-18-yl]acetate	C42 H50 O20	874.293	10.558	Full match	No results	No results	44786.5	22844.6	21036.5	26899.4	48567.3	141947	7115.64	19634.5	7371.61	40399.6	10548.7	7138.26	3.31946	1.73095	0.0157245	0.916667	1.56614
Com_1810_pos	Methyl (9Z)-8,11,12-trihydroxy-9-octadecenoate	C19 H36 O5	344.255	14.592	Full match	Invalid mass	No results	1.5565e+07	1.42721e+07	1.45979e+07	1.35162e+07	1.79456e+07	1.03677e+07	9.42793e+06	5.64347e+06	8.04904e+06	1.11256e+07	3.62568e+06	1.21239e+07	1.72544	0.786966	0.0206434	0.944444	0.830472
Com_1811_pos	Methyl (8-fluoro-6-{5-[(2-methyl-2-propanyl)sulfamoyl]-3-pyridinyl}[1,2,4]triazolo[1,5-a]pyridin-2-yl)carbamate	C17 H19 F N6 O4 S	422.118	8.773	Full match	Invalid mass	No results	2.38453e+06	1.90534e+06	3.55175e+06	2.96375e+06	4.43261e+06	1.87826e+06	1.79126e+06	2.92959e+06	2.8218e+06	1.514e+06	2.31374e+06	2.81561e+06	1.20656	0.270899	0.377138	0.694444	0.220599
Com_1813_pos	Methyl (7alpha,17beta,19alpha)-17-hydroxy-19-methyl-2-oxo-16,17-dihydroformosanan-16-carboxylate	C21 H26 N2 O5	386.183	8.664	Full match	No results	No results	294461	223489	160412	208314	241021	239806	214385	173341	151492	199823	104970	139361	1.39063	0.475737	0.0311005	0.888889	0.45051
Com_1814_pos	Methyl (5Z,8Z,11Z)-14,15-dihydroxy-5,8,11-icosatrienoate	C21 H36 O4	352.26	14.039	Full match	Invalid mass	No results	2.1834e+07	1.81226e+07	1.77038e+07	1.49689e+07	1.8831e+07	1.87035e+07	8.3736e+06	9.41325e+06	6.5087e+06	5.59436e+06	1.25375e+07	8.03641e+06	2.18303	1.12633	0.000402761	1	1.06527
Com_1816_pos	Methyl (5Z,14Z)-9-oxoprosta-5,10,14-trien-1-oate	C21 H32 O3	332.234	12.861	Full match	Invalid mass	No results	672025	479671	614586	259079	580760	253043	699418	865438	458254	372245	554922	724379	0.778076	-0.362016	0.229407	0.694444	0.373483
Com_1817_pos	Methyl (5aR,6R,7S,7aS,7bR,9aS,12R,13aS,13bS,15aS,15bS)-6-acetoxy-7,12,13a-trihydroxy-5a-[(1R)-1-hydroxyethyl]-7b,9a,12,15a-tetramethyl-3-oxo-5,5a,6,7,7a,7b,8,9,9a,10,11,12,13,13a,14,15,15a,15b-octadecahydrochryseno[2,1-c]oxepine-13b(3H)-carboxylate	C32 H48 O10	592.324	13.283	Full match	Invalid mass	No results	1.32572e+08	1.28104e+08	1.39235e+08	1.21765e+08	2.45678e+07	1.12373e+08	1.52655e+07	2.47915e+07	4.19573e+07	7.24277e+07	2.14639e+07	2.71892e+07	3.2429	1.69728	0.00806389	0.888889	1.55592
Com_1820_pos	Methyl (5alpha,12beta,19alpha)-15-[(12R,13bS)-1-ethyl-5,6,12,13,13a,13b-hexahydro-3H-indolo[3,2,1-de]pyrido[3,2,1-ij][1,5]naphthyridin-12-yl]-16-hydroxy-2,3,6,7-tetradehydroaspidospermidine-3-carboxylate	C40 H44 N4 O3	628.344	12.308	Full match	Invalid mass	No results	6.39841e+06	7.10393e+06	8.36078e+06	8.61867e+06	8.77235e+06	8.34066e+06	5.03058e+06	8.16791e+06	6.39842e+06	5.06367e+06	7.24258e+06	7.15176e+06	1.21866	0.285299	0.0621629	0.805556	0.274696
Com_1821_pos	Methyl (3S,4R)-3-acetoxy-4-[(1R,3aS,5R,6S,7R,7aR)-6-(formyloxy)-3a-hydroxy-7-(3-hydroxy-4-methyl-2-oxohexyl)-1-(5-hydroxy-2-oxo-2,5-dihydro-3-furanyl)-7a-methyl-4-methylene-3-oxooctahydro-1H-inden-5-yl]-4-[(2S,3R)-2-(hydroxymethyl)-2-methyl-5-oxotetrahydro-3-furanyl]pentanoate	C37 H50 O16	750.313	12.062	Full match	No results	No results	12902.8	12485.5	16169.1	23581.4	11139.2	12682.6	65365.8	32338.4	22446.3	16848.8	11666.1	18728.2	0.531446	-0.912006	0.105572	0.777778	0.661213
Com_1822_pos	Methyl (3R,3aS,5aS,5bS,7aS,8S,11aR,12aS,12bR)-5b-acetoxy-8-(3-furyl)-4,4,7a,12b-tetramethyl-1,5,10-trioxotetradecahydro-1H-furo[3,4-g]pyrano[4',3':1,5]cyclopenta[1,2-b][1]benzofuran-3-carboxylate	C28 H32 O11	544.192	8.615	Full match	No results	No results	164505	188213	200510	209691	185066	136413	284881	217731	228795	186068	111258	154239	0.916674	-0.12552	0.730494	0.611111	0.128901
Com_1823_pos	Methyl (3beta,5xi,7beta,13E,14alpha)-3-acetoxy-7-hydroxy-13-(2-methoxy-2-oxoethylidene)-14-methyl-6-oxopodocarpan-16-oate	C24 H34 O8	450.224	11.78	Full match	Invalid mass	No results	71172.6	80613.4	74361.3	71549.8	70344.1	79873.2	156275	162587	335855	125452	67110.5	143141	0.452246	-1.14482	0.0228481	0.833333	0.906753
Com_1824_pos	Methyl (3aR,5Z,9E,11aS)-10-methyl-3-methylene-2-oxo-2,3,3a,4,7,8,11,11a-octahydrocyclodeca[b]furan-6-carboxylate	C16 H20 O4	276.135	11.539	Full match	No results	No results	2488.98	1249.25	1582.26	1282.61	1267.75	1523.61	1536.05	1408.66	1250.36	1185.35	1111.06	1093.37	1.23858	0.308688	0.156272	0.777778	0.249817
Com_1827_pos	Methyl (3aR,4aS,7aR,9aR,9bR)-3-(4-hydroxy-3-methoxybenzyl)-2-oxooctahydro-2H,4aH-1,4,5-trioxadicyclopenta[a,hi]indene-7-carboxylate	C21 H24 O8	404.146	9.732	Full match	No results	No results	219287	175088	196450	218941	225342	204903	259872	197095	193565	251645	143682	162245	1.02641	0.0376081	0.675428	0.583333	0.0843859
Com_1828_pos	Methyl (2Z,3E)-2-(2-oxopropylidene)-3-hexadecenoate	C20 H34 O3	322.25	12.054	Full match	Invalid mass	No results	3.29607e+06	5.19458e+06	5.69206e+06	5.34111e+06	4.51654e+06	4.31692e+06	3.98035e+06	5.64836e+06	4.45315e+06	2.41104e+06	3.10041e+06	3.48806e+06	1.22858	0.296991	0.154879	0.75	0.299179
Com_1830_pos	Methyl (2Z)-2-[(1aR,1bS,2R,4bR,8aS,9R,9aS,10aR,10bS,10cS,11aS,11bS)-9-(acetoxymethyl)-11a-hydroperoxy-2-hydroxy-7-(hydroxymethyl)-1b,10b-dimethyl-3,6-dioxo-1a,1b,2,3,6,8,8a,9,9a,10,10a,10b,10c,11,11a,11b-hexadecahydrocyclopropa[4,5]cyclopropa[4',5']cyclopenta[1',2':7,8]acephenanthryleno[10a,10-b]furan-4(1H)-ylidene]propanoate	C33 H38 O11	610.241	11.032	Full match	No results	No results	92811.8	79211.5	157255	424357	59797.3	104259	403244	60590.4	295846	185723	56734.7	48168.2	0.873738	-0.194728	0.950369	0.444444	0.227393
Com_1831_pos	Methyl (2S,4aR,6aS,7R,8S,10bR)-2-(3-furyl)-7-hydroxy-6a,10b-dimethyl-8-[(R)-methylsulfinyl]-4-oxo-1,4,4a,5,6,6a,7,8,9,10b-decahydro-2H-benzo[f]isochromene-7-carboxylate	C22 H28 O7 S	436.157	12.323	Full match	No results	No results	823554	882878	892761	525539	1.23106e+06	737518	544406	752660	589286	391334	557996	661790	1.45628	0.542291	0.0321037	0.833333	0.478835
Com_1832_pos	Methyl (2S,3S,4R)-3,4,6-trihydroxy-2-methyl-5-oxo-3,4-dihydro-2H,5H-thiopyrano[2,3-b]chromene-4-carboxylate	C15 H14 O7 S	338.047	7.973	Full match	Invalid mass	No results	25825.3	18236.3	18820.9	19455.7	15139.4	18110.1	29799.1	14778	15409.9	22921.7	24133.1	14829.6	0.948441	-0.0763696	0.853325	0.472222	0.0516671
Com_1833_pos	Methyl (2S)-6-(beta-D-erythro-hexopyranosyloxy)-5-hydroxy-1-[(2E)-3-(4-hydroxy-3-methoxyphenyl)-2-propenoyl]-2-indolinecarboxylate	C26 H29 N O12	547.169	8.02	Full match	No results	No results	22411.6	24546.7	29733.8	34349.9	31412.4	22733.7	19539.6	16530.7	19680.7	11083.4	6365.11	13771.2	1.89935	0.925507	0.00875617	1	0.930617
Com_1834_pos	Methyl (2S)-2-{6-[6-(2,2-dimethyl-6-methylenecyclohexyl)-4-methylhexyl]-6-methyl-1,2-dioxan-3-yl}propanoate	C25 H44 O4	408.323	14.777	Full match	No results	No results	7.33524e+06	4.64408e+06	6.05139e+06	6.67862e+06	6.81436e+06	7.06767e+06	3.58725e+06	2.24609e+06	2.88055e+06	2.19689e+06	1.41248e+06	2.66364e+06	2.57501	1.36458	0.000197181	1	1.28712
Com_1836_pos	Methyl (2R)-2-(6-{2-[(1R,2S,4aR,5S,8aS)-8a-hydroxy-1,2,4a,5-tetramethyldecahydro-1-naphthalenyl]ethyl}-6-methyl-1,2-dioxan-3-yl)propanoate	C25 H44 O5	424.318	15.031	Full match	Invalid mass	No results	47051.4	67825.4	180336	42543.9	46050.5	45981.1	194177	191765	102126	264376	439346	164380	0.316914	-1.65784	0.0025924	0.944444	1.58812
Com_1837_pos	Methyl (2E)-3-[4-amino-7-(3-hydroxypropyl)-5-(4-methylphenyl)-7H-pyrrolo[2,3-d]pyrimidin-6-yl]acrylate	C20 H22 N4 O3	366.171	11.661	Full match	No results	No results	279682	390963	324960	388802	293815	297734	32462.4	38013.6	16455.6	31213.4	110601	29143	7.66205	2.93773	0.000225482	1	2.91501
Com_1838_pos	Methyl (2E)-2-(1-hydroxy-2-oxopropyl)-2-hexadecenoate	C20 H36 O4	340.26	15.041	Full match	No results	No results	67015.8	203243	124525	88066.7	125336	35007.5	60288.9	18780.7	44573.3	83463.7	22225.4	48245.4	2.31717	1.21236	0.0360478	0.861111	1.13545
Com_1839_pos	Methyl (2alpha,3beta,5xi,9xi,18xi)-2,3,19-trihydroxyurs-12-en-28-oate	C31 H50 O5	502.365	14.647	Full match	No results	No results	1.32336e+06	1.96023e+06	3.23695e+06	2.51847e+06	2.11778e+06	1.85876e+06	1.81147e+06	3.41322e+06	3.11242e+06	3.28402e+06	2.78121e+06	3.91569e+06	0.710532	-0.493028	0.0581445	0.805556	0.464788
Com_183_pos	TRIP	C50 H57 O4 P	752.396	12.88	Full match	No results	No results	24749.7	36499.1	26559.1	32699.2	39228.5	40485.4	30950.3	41662.6	62109.6	32258.6	38330	47226	0.792838	-0.334902	0.134642	0.722222	0.289693
Com_1841_pos	Methyl (2,2-dimethyl-1,3-dioxolan-4-yl)(hydroxy)acetate	C8 H14 O5	190.084	6.159	Full match	No results	No results	15831.6	15746.7	18959.5	24170.2	18924.4	21969.1	14053.5	17602	10006.6	20759.1	18506.8	18414.2	1.16367	0.21868	0.23243	0.722222	0.222739
Com_1843_pos	Methyl (1S,4aS,7R,7aS)-1-(beta-D-glucopyranosyloxy)-4'-(4-hydroxy-3-methoxybenzoyl)-5'-oxo-4a,7a-dihydro-1H,5'H-spiro[cyclopenta[c]pyran-7,2'-furan]-4-carboxylate	C27 H28 O14	576.15	8.174	Full match	Invalid mass	No results	22139.3	19561.1	16237.8	22681.9	25497.3	23266.4	48099.1	32111.5	22993.2	49221.7	21834.9	10192	0.701448	-0.511591	0.38349	0.666667	0.309694
Com_1845_pos	Methyl (1S,2S)-2-hexadecyl-2-hydroxy-5-oxo-3-cyclopentene-1-carboxylate	C23 H40 O4	380.292	14.371	Full match	No results	No results	1.86593e+06	1.52016e+06	1.58654e+06	1.65226e+06	1.89835e+06	1.46351e+06	794352	728136	665670	546114	218901	559318	2.84321	1.50752	0.00170251	1	1.4775
Com_1847_pos	Methyl (1S,11S,17R,18S)-18-{(2R,4S)-5-[(2R,12bS)-3-(methoxycarbonyl)-1,2,6,7,12,12b-hexahydroindolo[2,3-a]quinolizin-2-yl]-4-methyl-3,4-dihydro-2H-pyran-2-yl}-8,14-diazapentacyclo[9.5.2.0~1,9~.0~2,7~.0~14,17~]octadeca-2,4,6,9-tetraene-10-carboxylate	C41 H44 N4 O5	672.332	14.072	Full match	No results	No results	5.54443e+06	3.89981e+06	3.52229e+06	3.40199e+06	3.85639e+06	3.39329e+06	3.46265e+06	2.41984e+06	2.79186e+06	3.52839e+06	2.90042e+06	3.96237e+06	1.23879	0.308932	0.0731542	0.722222	0.280202
Com_1849_pos	Methyl (1R,8R,9S,14R,16S,18S,19S,20S,22R)-8,14-dihydroxy-16,29-dimethyl-6,24-dioxo-5,13,17,25,30-pentaoxaoctacyclo[20.6.2.1~3,7~.0~1,20~.0~9,18~.0~10,15~.0~19,31~.0~23,28~]hentriaconta-2,7(31),10(15),23(28)-tetraene-9-carboxylate	C30 H32 O11	568.196	10.839	Full match	No results	No results	42590.5	48566	40154.3	23258.4	44295.1	35470	29885.1	17270.6	25237.3	16108.7	12902.5	10674.7	2.0908	1.06405	0.00313756	0.944444	1.0281
Com_184_pos	Trioxsalen	C14 H12 O3	228.078	7.826	Full match	No results	No results	152366	121804	140827	135306	131361	124492	192758	143910	166086	183067	131592	155464	0.828631	-0.271199	0.0279751	0.888889	0.243401
Com_1850_pos	Methyl (1R,6R,10R,11R)-10,13-dihydroxy-6-methyl-3,9-dioxo-8,12-dioxatetracyclo[9.2.1.0~1,5~.0~6,10~]tetradec-4-ene-13-carboxylate	C15 H16 O8	324.084	6.719	Full match	Invalid mass	No results	592238	354267	259147	418258	509829	929829	218618	84484.8	212012	117781	95729.5	146141	3.50216	1.80824	0.000485676	1	1.62801
Com_1851_pos	Methyl (1R,2R,6R,10R,11R)-10,13-dihydroxy-2,6-dimethyl-3,9-dioxo-8,12-dioxatetracyclo[9.2.1.0~1,5~.0~6,10~]tetradec-4-ene-13-carboxylate	C16 H18 O8	338.099	9.206	Full match	Invalid mass	No results	175412	154961	166601	162942	156094	165421	142787	133741	124217	138424	229140	127689	1.09535	0.13139	0.278011	0.833333	0.17077
Com_1853_pos	Methyl (1aS,1bS,2R,3S,3bR,4S,5R,5aR,10aS,10bS,12aR,12bS,14aR)-2,3,4,5-tetraacetoxy-5a-[(1R)-1-acetoxyethyl]-1b,10b,12b-trimethyl-14-methylene-8-oxo-2,3,3a,3b,4,5,5a,6,8,10a,10b,11,12,12a,12b,13,14,14a-octadecahydrooxireno[7,8]chryseno[2,1-c]oxepine-1a(1bH)-carboxylate	C40 H52 O15	772.333	13.453	Full match	No results	No results	4887.08	4680.61	4772.48	4910.66	4691.83	4803.42	5190.94	5336.53	5701.44	5078.42	4624.74	5727.89	0.907963	-0.139295	0.0335179	0.833333	0.124808
Com_1854_pos	Methyl (1aR,4E,6S,7S,7aR,10aS,10bS)-6-acetoxy-7-{[2-hydroxy-2-methyl-3-({[(3aR,4R,6E,10E,11aR)-10-methyl-4-{[(2Z)-2-methyl-2-butenoyl]oxy}-3-methylene-2-oxo-2,3,3a,4,5,8,9,11a-octahydrocyclodeca[b]furan-6-yl]carbonyl}oxy)butanoyl]oxy}-1a-methyl-8-methylene-9-oxo-1a,2,3,6,7,7a,8,9,10a,10b-decahydrooxireno[9,10]cyclodeca[1,2-b]furan-5-carboxylate	C43 H52 O16	824.329	15.247	Full match	No results	No results	1916.11	2050.84	1872.38	1991.51	1824.86	1838.48	2784.49	3501.8	2569.73	2210.12	2263.66	3634.91	0.677534	-0.561634	0.00713936	1	0.487812
Com_1855_pos	Methyl (17Z)-3,11-dioxopregna-4,17-dien-21-oate	C22 H28 O4	356.198	13.006	Full match	No results	No results	43653.5	30843.3	26701.2	29624.3	44716.8	38900.5	46533.1	30702.2	33630	39305.7	35579.3	41081	0.94537	-0.0810491	0.55317	0.611111	0.0874464
Com_1856_pos	Methyl (13alpha,17alpha,23R,24E)-9,23-dihydroxy-4,4,17-trimethyl-3,15-dioxocholesta-8(14),24-dien-26-oate	C31 H46 O6	514.329	13.944	Full match	Invalid mass	No results	1.73736e+06	1.37961e+06	1.21436e+06	1.38756e+06	1.5589e+06	2.37695e+06	527938	1.52998e+06	1.57695e+06	1.54841e+06	1.04238e+06	864804	1.36165	0.44536	0.11976	0.722222	0.466942
Com_1857_pos	methoxyphenone	C16 H16 O2	240.115	13.011	Full match	No results	No results	39571.6	38326.9	28179	40544.1	26801.4	31564.3	35738.6	23887.4	31847.5	21308.2	25486.9	22073.8	1.27843	0.354379	0.0508778	0.833333	0.329442
Com_1858_pos	Methohexital	C14 H18 N2 O3	262.131	8.386	Full match	Invalid mass	No results	319146	323763	313490	336817	379281	296033	278760	307943	233016	291424	129472	259875	1.31192	0.391684	0.0665795	0.972222	0.416892
Com_1860_pos	Methionine sulfoxide	C5 H11 N O3 S	165.046	1.52	Full match	Full match	No results	7.07552e+06	6.72629e+06	7.91021e+06	4.16283e+06	4.60377e+06	7.52982e+06	6.79954e+06	6.87241e+06	4.50305e+06	7.50531e+06	6.18589e+06	8.14112e+06	0.950037	-0.073944	0.658561	0.472222	0.0859416
Com_1861_pos	Methionine	C5 H11 N O2 S	149.051	1.527	Full match	Full match	No results	6.61027e+06	6.85236e+06	6.40029e+06	1.04929e+07	6.58344e+06	6.83702e+06	2.09956e+06	1.51537e+06	2.71557e+06	2.26869e+06	5.03961e+06	2.61695e+06	2.69297	1.4292	0.000607383	1	1.37552
Com_1862_pos	Methdilazine	C18 H20 N2 S	296.134	8.501	Full match	No results	No results	460417	473380	504810	420726	272719	385133	45780	32739.7	24928.4	85141.5	61149	33370.9	8.89121	3.15238	8.98755e-06	1	2.96318
Com_1869_pos	Metenolone enanthate	C27 H42 O3	414.312	13.886	Full match	Partial match	No results	4.22756e+06	4.16248e+06	6.14905e+06	5.18205e+06	5.03838e+06	5.10037e+06	8.60641e+06	4.7914e+06	5.26014e+06	5.99933e+06	4.8182e+06	7.28534e+06	0.812274	-0.299961	0.128553	0.722222	0.263187
Com_186_pos	Trinexapac-ethyl	C13 H16 O5	252.099	7.841	Full match	No results	No results	253606	168381	176538	175316	246404	222303	142877	137823	156952	166148	125252	155636	1.40451	0.490062	0.00533949	1	0.434921
Com_1870_pos	Metalaxyl	C15 H21 N O4	279.146	6.829	Full match	No results	No results	26402.2	8696.88	15171.9	9126.36	12485.9	10851.9	14650.6	12465.9	11597.8	40836	20701.4	7944.54	0.764676	-0.387079	0.503202	0.583333	0.26281
Com_1871_pos	Mesuximide	C12 H13 N O2	203.094	5.641	Full match	Invalid mass	No results	13288.6	27309.9	48112.9	32478.9	32682.8	30478.1	166968	143604	178948	243899	164796	188472	0.169645	-2.55941	3.35406e-05	1	2.40104
Com_1872_pos	Mesterolone	C20 H32 O2	304.239	12.055	Partial match	Full match	No results	3.75074e+06	5.64405e+06	6.21027e+06	5.23544e+06	5.30594e+06	4.63582e+06	3.93106e+06	5.90789e+06	4.9441e+06	2.93111e+06	3.45987e+06	3.65104e+06	1.23997	0.310302	0.101682	0.777778	0.30516
Com_1875_pos	Meropenem	C17 H25 N3 O5 S	383.151	6.713	Full match	No results	No results	86761	51867	70832.2	78717.9	85337	95388.8	57409.2	45160.7	40426.1	116477	43517.7	62161.4	1.28413	0.360795	0.135307	0.777778	0.405269
Com_1876_pos	meprobamate	C9 H18 N2 O4	218.126	6.72	Full match	No results	No results	5020.19	4878.41	4845.6	4346.02	4262.37	4139.13	1630.75	1967.14	3041.81	2931.44	1650.03	4172	1.78597	0.836707	0.00861896	0.972222	0.849112
Com_1879_pos	Menadione	C11 H8 O2	172.052	6.981	Full match	Invalid mass	No results	27422.1	17414.9	22309.8	20359.5	18695.2	19389	27872.5	35732.4	26557.6	40519.1	28998.3	24911.1	0.680372	-0.555604	0.00377954	0.944444	0.501547
Com_1882_pos	Menadiol	C11 H10 O2	174.068	11.945	Full match	No results	No results	12931	18086.4	14063.7	14787.2	12673.9	15835.9	20199.5	15778.1	16624.6	16234.1	16851.8	10680.7	0.917081	-0.124879	0.470019	0.694444	0.101581
Com_1889_pos	melosuavine H	C42 H46 N4 O5	686.349	10.798	Full match	No results	No results	72793.6	68414.9	96838.6	100679	100092	82291.9	51986.6	34558.1	34403.6	43690.4	14642	21587.1	2.59429	1.37534	0.00207614	1	1.3623
Com_188_pos	Trimethylolpropane trimethacrylate	C18 H26 O6	338.172	10.745	Full match	No results	No results	118818	156424	131400	151818	99881.6	97639.8	233027	514054	288826	145356	106698	160418	0.52195	-0.938018	0.0714776	0.833333	0.694917
Com_1890_pos	Melilotoside	C15 H18 O8	326.099	7.428	Full match	No results	No results	47263.6	59802.9	121389	119108	82364.9	68815.9	73967.7	60806.2	76090.5	45521.8	34481.9	55062	1.44175	0.52782	0.11468	0.75	0.475488
Com_1891_pos	melicopicine	C18 H19 N O5	329.126	9.196	Full match	No results	No results	12277.3	6263.52	7734.45	8218.8	7039.37	8510.14	6725.55	6258.84	3991.28	10872.1	7821.3	5380.57	1.2191	0.285815	0.215886	0.75	0.297726
Com_1892_pos	Melatonin	C13 H16 N2 O2	232.121	5.82	Full match	No results	No results	231252	177878	15706.6	75663.1	157847	14520.2	58591.9	26276.6	17941.6	52278	14941.9	18687.1	3.56548	1.8341	0.136464	0.694444	1.23255
Com_1894_pos	Megestrol acetate	C24 H32 O4	384.229	11.221	Full match	No results	No results	105194	95856.1	110162	115838	122574	131430	75151.6	76660.5	94155.3	69904.4	29827.4	40025.5	1.76565	0.820197	0.0159269	1	0.851648
Com_1895_pos	Megestrol	C22 H30 O3	342.218	11.536	Full match	No results	No results	35908.9	24789.2	42365.4	38223.2	38099	33358.4	50229.1	32145.5	42576.3	26488.7	28924.3	34239.8	0.991335	-0.0125556	0.983639	0.527778	0.0562858
Com_1898_pos	Medrysone	C22 H32 O3	344.234	12.316	Not the top hit	Full match	No results	5.51248e+06	6.4781e+06	4.7767e+06	7.05579e+06	4.72821e+06	7.32089e+06	3.70738e+06	5.17497e+06	3.7987e+06	2.92635e+06	4.19267e+06	4.0932e+06	1.50135	0.586261	0.00406607	0.944444	0.536423
Com_1899_pos	Medroxyprogesterone 17-acetate	C24 H34 O4	386.244	14.323	Full match	No results	No results	5382.03	3617.2	5178.56	9884.79	3852.08	6313.7	5767.28	6086.87	5119.93	5822.43	5127.47	4635.26	1.05126	0.0721248	0.97872	0.5	0.0445815
Com_189_pos	Trimethylolpropane triacrylate	C15 H20 O6	296.125	8.757	Full match	No results	No results	77686.9	60304.9	58015.6	37742.8	52168.4	49230.3	105143	55069.6	106805	169098	75658	74897	0.571272	-0.807749	0.0228597	0.861111	0.687792
Com_1902_pos	Medrogestone	C23 H32 O2	340.239	14.819	Full match	No results	No results	2282.65	5021.72	6669.55	7602.13	6683.62	3044.04	7200.09	6219.35	7848.85	9719.47	4550.54	3754.04	0.796687	-0.327915	0.307556	0.666667	0.375129
Com_1906_pos	mebutamate	C10 H20 N2 O4	232.142	5.85	Full match	No results	No results	515375	578068	479774	655620	577681	456041	72274.7	88689.7	48725.2	61916.6	145807	61819.1	6.80789	2.76721	1.5904e-05	1	2.59934
Com_1907_pos	Mebeverine	C25 H35 N O5	429.25	12.178	Full match	No results	No results	58629.4	41731.2	46692.7	27991.1	41622	37347.7	44983.2	66767.9	26050.3	62080.8	76433.8	84688.1	0.703632	-0.507106	0.169882	0.777778	0.415224
Com_1908_pos	Mebendazole	C16 H13 N3 O3	295.096	8.624	Full match	No results	No results	6323.58	9013.16	8555.88	7161.17	12237	8543.77	7127.52	10616.2	13995.4	8364.2	4822.32	6885.81	1.00045	0.000642534	0.843451	0.583333	0.135377
Com_1909_pos	MDPBP	C15 H19 N O3	261.136	6.859	Partial match	Full match	No results	1.10602e+06	2.52396e+06	141797	1.09696e+06	1.97904e+06	125700	225615	385633	288651	229398	264388	459868	3.76222	1.91158	0.181746	0.666667	1.10871
Com_1910_pos	Matricin	C17 H22 O5	306.146	12.714	Full match	No results	No results	41205.5	38021.5	40922.4	29169.2	36159.7	41352.6	45711.4	67842.4	50659.7	46864	28112.1	38129.8	0.81794	-0.289932	0.231817	0.75	0.235598
Com_1911_pos	Masitinib	C28 H30 N6 O S	498.221	10.62	Full match	No results	No results	14692.8	10774.5	11964.5	11112.3	10763.7	11624.2	13414.8	13780	12806.6	13467.9	18171.9	13153.6	0.836513	-0.25754	0.0323494	0.861111	0.242245
Com_1913_pos	marrubin	C20 H28 O4	332.198	12.544	Full match	No results	No results	129388	158668	179010	153307	169605	159171	130624	199951	135574	115764	137614	139821	1.1045	0.143395	0.246102	0.722222	0.143874
Com_1916_pos	marinomycin A	C58 H76 O14	996.521	1.13	Full match	No results	No results	143459	114826	302392	152421	158142	213604	358863	206422	280958	285428	188864	96777	0.765424	-0.38567	0.331531	0.666667	0.33294
Com_1917_pos	marinisporolide A	C38 H58 O10	674.401	14.324	Full match	No results	No results	38547.5	49664	48565.2	40440.5	55314.7	49150.2	20325.8	37476.8	42187.7	31220.8	39737.7	40264.1	1.33364	0.41537	0.0424246	0.888889	0.405458
Com_1918_pos	Marimastat	C15 H29 N3 O5	331.21	8.965	Full match	No results	No results	310752	279181	290261	315278	244619	252903	43998.5	37294.9	21880.9	28590.9	47726.4	34994	7.89328	2.98063	1.82286e-06	1	2.75208
Com_1923_pos	Marasmic acid	C15 H18 O4	262.12	8.12	Full match	Invalid mass	No results	184811	168186	185960	122109	149918	195445	115817	104210	141808	115423	77724.9	120192	1.49062	0.575911	0.00425694	0.972222	0.540819
Com_1924_pos	Mansonone C	C15 H16 O2	228.115	8.324	Full match	Invalid mass	No results	313822	356308	404275	426065	356644	426401	262779	269782	330468	231389	119979	311501	1.4965	0.581597	0.029893	0.972222	0.605037
Com_1925_pos	Manoalide	C25 H36 O5	416.255	11.56	Full match	No results	No results	24170.2	29750.8	34703.2	29525.7	31135.9	30757	26683.3	13913.9	22177.2	16953.8	22191.6	28005.9	1.38574	0.470653	0.023065	0.944444	0.46309
Com_1926_pos	Mannopine	C11 H22 N2 O8	310.139	8.784	Full match	No results	No results	82322	68494.7	68167.5	62108.3	63688.2	62389.1	81427.1	49261.4	56256.8	61590.4	34176.1	42849.8	1.25067	0.322701	0.0946044	0.861111	0.351889
Com_1927_pos	Maltol	C6 H6 O3	126.031	5.311	Not the top hit	Full match	Partial match	1.60535e+07	1.96339e+07	1.74844e+07	1.81509e+07	1.84362e+07	1.43906e+07	1.70885e+07	1.34291e+07	1.66372e+07	1.10062e+07	1.16868e+07	1.38625e+07	1.24417	0.315181	0.0288211	0.888889	0.302405
Com_1929_pos	malonylgenistin	C24 H22 O13	518.105	9.949	Full match	Invalid mass	No results	8.62284e+06	1.29926e+07	1.35284e+07	1.06708e+07	7.05416e+06	3.70551e+06	2.86329e+07	3.22397e+07	2.2343e+07	1.99522e+07	2.85474e+07	2.79895e+07	0.354243	-1.49719	0.00157882	1	1.4585
Com_1932_pos	Malonylapiin	C29 H30 O17	650.147	9.561	Full match	Invalid mass	No results	3.13302e+07	2.63004e+07	5.26953e+07	2.78498e+07	3.01868e+07	3.33682e+07	3.75861e+07	2.95857e+07	3.17038e+07	3.09709e+07	4.32523e+07	3.64416e+07	0.962729	-0.0547979	0.636723	0.666667	0.0772351
Com_1936_pos	Malonic acid	C3 H4 O4	104.011	2.393	Full match	No results	No results	3404.19	5281.37	6893.54	5616.68	4980.04	7218.68	3029.67	3539.26	2996.85	2563.72	4030.59	2555.77	1.78429	0.835349	0.00229381	0.944444	0.741195
Com_1940_pos	Malondialdehyde	C3 H4 O2	72.021	1.321	Full match	Invalid mass	No results	8.77395e+06	8.78668e+06	9.7037e+06	1.11816e+07	9.26308e+06	9.13386e+06	1.07772e+07	8.18336e+06	8.36134e+06	7.8318e+06	6.12106e+06	7.03346e+06	1.17667	0.234711	0.0806201	0.861111	0.235548
Com_1945_pos	Mallotophenone	C21 H24 O8	404.146	7.029	Full match	No results	No results	31396.1	15724.7	20391.5	22443.1	24853.5	24426.5	32147.2	19171.8	22661.6	38634.5	16650.2	19478.8	0.936073	-0.0953064	0.810035	0.5	0.0875496
Com_1947_pos	Maleimide	C4 H3 N O2	97.0162	0.549	Full match	No results	No results	6279.45	1685.43	4137.02	7989.49	6566.73	6922.33	8159.18	4421.44	10163.9	5852.95	10213.7	7779.95	0.720748	-0.472434	0.183365	0.75	0.526794
Com_1948_pos	malayscaphiol	C15 H14 O5	274.084	6.977	Full match	No results	No results	14450.8	11187.6	15004	10372.2	10600.9	7217.17	17048.7	15597.6	11803.8	14879.8	14906.9	12966.8	0.789332	-0.341295	0.0691815	0.833333	0.33848
Com_1949_pos	Makisterone A	C28 H46 O7	494.324	12.778	Full match	No results	No results	85273.4	79594.9	146160	121146	112751	119950	118867	228656	288161	199237	213140	304276	0.491649	-1.0243	0.0026521	0.916667	0.90485
Com_194_pos	Trimethyl(1-(2-(trimethylsilyloxy)cyclohex-1-enyl)vinyloxy)silane	C14 H28 O2 Si2	284.162	8.805	Full match	No results	No results	231090	195529	160764	228840	178344	234824	13994.3	11181.5	11415.3	13639.2	17916.5	11983.5	15.3424	3.93945	8.81132e-11	1	3.59287
Com_1950_pos	majusculoic acid	C15 H23 Br O2	314.087	1.177	Full match	No results	No results	62682.6	67764.3	65009.8	84403.5	69152.9	94275.7	115635	54251.2	55085.7	24491.2	31015.9	46500.9	1.35571	0.439045	0.117912	0.833333	0.555628
Com_1954_pos	Macrozamin	C13 H24 N2 O11	384.139	7.047	Full match	No results	No results	46115	38830.4	33842.4	38593.2	44027.6	46742.2	40990.1	32815.9	32492.9	33793.6	19962.7	37351.2	1.25706	0.330048	0.0662568	0.888889	0.331957
Com_1957_pos	machilusmarin	C36 H40 O6	568.285	12.798	Full match	No results	No results	44769.2	40948.2	32864.1	38291.9	42289.9	72172.2	53575.5	45292	40720.2	55771.7	32348.3	46086.2	0.991021	-0.0130123	0.853835	0.611111	0.0448225
Com_1959_pos	macarpine	C22 H18 N O6	392.112	7.885	Full match	No results	No results	126736	167997	297232	346839	182361	143633	261666	257414	372080	157801	124262	455534	0.776542	-0.364865	0.405543	0.611111	0.334155
Com_195_pos	Trimethoprim	C14 H18 N4 O3	290.137	8.059	Full match	Full match	No results	542355	523228	591227	623431	583685	617883	290315	532998	506534	380161	387755	477777	1.35188	0.434963	0.0170506	0.972222	0.421
Com_1961_pos	LysoPC(18:3(9Z,12Z,15Z))	C26 H48 N O7 P	517.316	14.022	Full match	Invalid mass	No results	1.11185e+07	1.20916e+07	1.15047e+07	1.40933e+07	1.29359e+07	1.5367e+07	8.30736e+06	7.17442e+06	5.24063e+06	7.43426e+06	1.32906e+07	7.48168e+06	1.57598	0.656249	0.00882521	0.888889	0.649464
Com_1962_pos	lycorenine	C18 H23 N O4	317.162	8.007	Full match	No results	No results	6023.42	5039.27	5360.98	5766.98	5245.58	6130.32	6150.17	5631.44	5810.15	6075.16	6156.72	5702.49	0.944841	-0.0818564	0.147631	0.75	0.0792578
Com_1964_pos	lycopsamine	C15 H25 N O5	299.173	8.324	Full match	Invalid mass	No results	860134	934998	1.10236e+06	1.05778e+06	942883	1.1538e+06	884718	789263	902755	652493	358860	757262	1.39274	0.477927	0.0464436	0.944444	0.505392
Com_1968_pos	luteolin 7-O-(6-O-malonyl-beta-D-glucoside)	C24 H22 O14	534.1	9.221	Full match	Invalid mass	No results	254793	314022	219291	249199	257223	172841	387814	398547	387896	261988	159867	338666	0.758418	-0.398935	0.179604	0.805556	0.335694
Com_1969_pos	Luteolin	C15 H10 O6	286.047	9.677	Partial match	Full match	Full match	1.77142e+06	1.81756e+06	1.86441e+06	1.99261e+06	1.87798e+06	1.42807e+06	2.7791e+06	2.2349e+06	2.4185e+06	2.04868e+06	1.21079e+06	2.64979e+06	0.805894	-0.311338	0.202726	0.833333	0.267447
Com_196_pos	trimethobenzamide	C21 H28 N2 O5	388.199	8.603	Full match	Invalid mass	No results	553109	426791	415218	397322	403072	407297	381388	187142	244085	324255	164764	206420	1.72594	0.78738	0.00548124	1	0.776328
Com_1974_pos	Lupulone	C26 H38 O4	414.276	12.268	Full match	No results	No results	391230	298799	347576	355201	389956	464385	278283	411911	318018	250574	224227	344008	1.22995	0.298602	0.0762363	0.805556	0.287686
Com_1975_pos	lumutinine A	C42 H48 N4 O4	672.368	14.413	Full match	No results	No results	190479	73276.8	42952.2	75146.2	220025	73966.9	63777.9	27565	68130.5	19949.4	20849.1	19749.2	3.07173	1.61905	0.0107038	0.944444	1.45039
Com_1977_pos	Lucentamycin A	C28 H42 N6 O5	542.324	11.605	Full match	No results	No results	57672.7	78309	71875.9	21297.3	33791.6	43681.4	18098.8	34176.4	23874.2	13615.6	11020.6	24139.5	2.45449	1.29543	0.00806329	0.888889	1.16023
Com_1980_pos	L-Threonine	C4 H9 N O3	119.058	1.192	Not the top hit	Full match	Full match	1.72787e+06	1.82575e+06	1.71742e+06	1.80835e+06	1.6683e+06	2.12244e+06	1.49639e+06	1.56684e+06	1.63426e+06	1.71977e+06	2.46959e+06	1.98206e+06	1.00011	0.000162218	0.888906	0.638889	0.0641572
Com_1982_pos	L-Saccharopine	C11 H20 N2 O6	276.131	1.185	Full match	Full match	No results	509016	461884	502060	639884	667368	672664	912422	483395	443159	191334	216745	338119	1.33565	0.417537	0.13793	0.805556	0.556022
Com_1986_pos	L-Pyroglutamic acid	C5 H7 N O3	129.042	1.192	Full match	Full match	No results	4.11693e+06	4.48376e+06	3.98492e+06	3.65296e+06	4.13673e+06	4.87827e+06	1.284e+07	1.25605e+07	1.43578e+07	1.82246e+07	1.89329e+07	1.82378e+07	0.265398	-1.91377	6.1726e-07	1	1.73091
Com_1988_pos	L-Proline	C5 H9 N O2	115.063	1.079	Full match	No results	No results	14598.2	23664.2	24663.8	25479.4	41371.9	37202	24726.5	699420	21628.3	29329	533846	473116	0.0937	-3.41581	0.0844834	0.722222	2.05997
Com_1989_pos	L-Phenylalanine	C9 H11 N O2	165.079	4.535	Full match	Full match	Full match	3.57244e+07	2.94818e+07	2.59041e+07	2.72771e+07	2.53347e+07	2.96986e+07	1.75534e+07	1.08819e+07	1.32886e+07	1.87933e+07	2.27125e+07	2.05758e+07	1.67063	0.740394	0.00365135	1	0.706426
Com_198_pos	TRIMETHAPHAN	C22 H25 N2 O S	365.168	9.378	Full match	No results	No results	38441.1	32564	32784.6	33888.9	31438	36596.4	246637	194637	317552	350954	121289	183068	0.145469	-2.78122	5.51292e-05	1	2.45707
Com_1992_pos	Loxoprofen	C15 H18 O3	246.125	12.609	Full match	No results	No results	44767.4	40582.3	45658.3	36933.3	43811.2	41481	23183.6	33529.7	36410.2	25306.1	31745.5	30251.3	1.40353	0.489059	0.00275589	1	0.458022
Com_1994_pos	Lovastatin	C24 H36 O5	404.254	14.489	Full match	No results	No results	16360.7	17421.1	19602.9	15607.4	23262	17834.2	18120.5	13894.2	18261.1	17584.9	13252.6	20606.7	1.08227	0.114058	0.390793	0.444444	0.141809
Com_1998_pos	Loratadine	C22 H23 Cl N2 O2	382.143	11.68	Full match	No results	No results	105743	113474	149202	159217	109287	122955	14944.1	14825.4	11697.5	13386.6	26388.9	14295.2	7.95369	2.99163	1.98767e-07	1	2.75678
Com_1_pos	d-Valerolactam	C5 H9 N O	99.0683	1.221	Partial match	Full match	No results	1.02449e+08	1.10428e+08	1.10519e+08	1.02852e+08	1.08279e+08	1.21382e+08	7.88227e+07	9.28094e+07	8.34842e+07	8.31541e+07	7.17554e+07	8.52918e+07	1.32422	0.405141	0.000100892	1	0.372262
Com_2002_pos	Loperamide	C29 H33 Cl N2 O2	476.223	11.019	Full match	No results	No results	193750	806891	252112	820320	129580	826225	329248	50585.4	79986.8	272900	53964.5	32342	3.69814	1.8868	0.0204233	0.833333	1.89267
Com_2003_pos	longipedumin A	C31 H32 O8	532.212	11.494	Full match	No results	No results	75004.1	59263.9	44028.3	49184.4	87110.3	52059.5	74069.3	71161.5	91540.4	81578.4	36676.1	26649.4	0.960635	-0.05794	0.92939	0.527778	0.0834047
Com_2004_pos	Lonazolac	C17 H13 Cl N2 O2	312.068	7.308	Full match	No results	No results	48154.5	41433	53205.2	45140.1	46641.6	49205.6	48936	41793.2	53809.1	31167.8	47116.6	35688.6	1.09775	0.134546	0.278079	0.611111	0.141389
Com_2005_pos	lonaprisan	C28 H29 F5 O3	508.204	10.85	Full match	No results	No results	10258.7	9108.43	10190.8	9096.53	9186.87	11209.6	11709.4	10946.3	10628.2	12480.2	9640.97	15433.7	0.833598	-0.262577	0.0508994	0.861111	0.230506
Com_2007_pos	Lomibuvir	C25 H35 N O4 S	445.23	7.26	Full match	No results	No results	21655.9	21645.5	20771.8	27929.3	22250.9	25062.6	8447.25	9873.23	8444.15	9284.65	10891.9	7764.38	2.54665	1.3486	8.80708e-08	1	1.2298
Com_2013_pos	loliolide	C11 H16 O3	196.11	14.434	Full match	No results	No results	40047.7	50012.9	42238.4	39069.1	43373.7	45313.9	20749.3	29743.7	32225.9	28448.7	26501.1	27363.7	1.57579	0.656072	0.000182196	1	0.605601
Com_2014_pos	Loganin pentaacetate	C27 H36 O15	600.204	12.706	Full match	No results	No results	37857.3	25777.6	47882.3	46014	41218.5	55743.5	38123	50068.1	36124	24408.5	26511.6	20918.4	1.29742	0.375643	0.138225	0.75	0.365018
Com_2015_pos	Loganin	C17 H26 O10	390.152	11.205	Full match	Invalid mass	No results	40975	25780.3	21134.7	24356.7	45095.5	21206	18577.9	29277.9	51691.9	24131.1	8573.49	19360	1.17766	0.235925	0.385128	0.666667	0.374707
Com_2016_pos	Loganetin	C11 H16 O5	228.099	12.33	Full match	No results	No results	441506	407185	437094	332264	486040	456852	281101	420556	306672	251444	348967	359624	1.30105	0.379677	0.0172946	0.888889	0.356175
Com_2017_pos	loganate	C16 H24 O10	376.136	12.642	Full match	No results	No results	399510	398081	406684	229023	434030	368176	246488	315576	257975	263208	234306	264985	1.41261	0.498359	0.0165274	0.833333	0.43574
Com_2018_pos	Lofepramine	C26 H27 Cl N2 O	418.183	10.744	Full match	Invalid mass	No results	1.06196e+07	1.11526e+07	1.01099e+07	1.06669e+07	8.38242e+06	8.65778e+06	1.65043e+07	4.68506e+07	2.58546e+07	1.17501e+07	8.54659e+06	1.48032e+07	0.479363	-1.06081	0.0661305	0.861111	0.759849
Com_201_pos	Trimazosin	C20 H29 N5 O6	435.21	10.741	Full match	No results	No results	579224	479641	646444	598487	574537	428148	1.08946e+06	2.46891e+06	1.40661e+06	589843	432045	700984	0.494401	-1.01625	0.093281	0.805556	0.712027
Com_2020_pos	L-Norvalyl-3-{[(2E)-4-methoxy-4-oxo-2-butenoyl]amino}-L-alanine	C13 H21 N3 O6	315.142	5.726	Full match	No results	No results	169194	153510	144720	214064	118556	137755	12331.8	11088.2	11626	11642.4	14865	13061.5	12.5685	3.65174	7.87701e-09	1	3.31014
Com_2023_pos	L-METHIONINE-S,R-SULFOXIMINE	C5 H12 N2 O3 S	180.056	8.29	Full match	No results	No results	4876.63	6473.36	4134.36	4228.33	4448.67	4709.94	5238.03	4687.12	4339.43	4602.18	3827.24	4228.04	1.0724	0.100847	0.451463	0.611111	0.0848982
Com_2024_pos	L-lupinic acid	C13 H18 N6 O3	306.143	0.553	Full match	No results	No results	2866.79	688.889	3134.23	3465.65	3065.3	2854.27	3619.62	2838.83	3833.58	3500.6	8644.23	3587.47	0.617696	-0.69503	0.115012	0.861111	0.700248
Com_2026_pos	L-Lombricine	C6 H15 N4 O6 P	270.073	11.525	Full match	Invalid mass	No results	20059.4	18830.3	22486.6	19917.4	18057.1	19748.5	23326.9	20019.5	21104.8	19248.5	16803.9	18467.1	1.00108	0.00155852	0.942704	0.5	0.0409501
Com_2029_pos	liquiritigenin	C15 H12 O4	256.073	6.984	Full match	No results	No results	7390.39	6426.33	7479	6756.24	6522.53	6032.77	8470.32	9681.66	6053.82	10690.1	6607.11	6096.76	0.853098	-0.229217	0.246984	0.638889	0.17951
Com_202_pos	Triisopropyl{8,8,8-tris[3,5-bis(2-methyl-2-propanyl)phenyl]-3-(dibromomethylene)-1,4,6-octatriyn-1-yl}silane	C60 H84 Br2 Si	990.466	12.491	Full match	No results	No results	29058.2	46888.5	81467.5	38084.5	70727	64205.9	142471	236715	215150	100255	135525	222677	0.313862	-1.6718	0.000294316	1	1.54284
Com_2030_pos	LIPIDYL PSEUDOPTERANE A	C37 H54 O8	626.38	14.388	Full match	No results	No results	105448	113580	133841	138151	114720	84711.2	144193	285951	335133	244464	223479	297018	0.451206	-1.14814	0.000577786	1	1.01761
Com_2032_pos	Linolenic acid ethyl ester	C20 H34 O2	306.255	14.536	Partial match	Full match	Full match	583865	646830	630958	435470	492999	445144	386374	459722	274443	793887	227004	287103	1.33219	0.413798	0.110094	0.777778	0.497935
Com_2034_pos	Linoleic acid-biotin	C28 H48 N4 O3 S	542.324	12.557	No match	Invalid mass	No results	2.10461e+06	3.08623e+06	3.11997e+06	3.15927e+06	2.82435e+06	2.114e+06	1.89455e+06	2.77043e+06	1.88117e+06	890262	2.94856e+06	2.82468e+06	1.24215	0.312845	0.216065	0.777778	0.372089
Com_2035_pos	limonoic acid	C26 H34 O10	506.214	9.378	Full match	No results	No results	74403.8	53551.5	59016.6	54989.3	59374.7	47583.6	43440.2	48527.9	47407.7	63626.3	45799.4	36035.4	1.22498	0.292759	0.0584908	0.833333	0.27363
Com_2036_pos	likonide B	C22 H28 O3	340.203	13.688	Full match	Invalid mass	No results	157985	114285	152685	169156	143301	136020	190069	171816	192180	152586	129397	204576	0.839335	-0.252682	0.0876854	0.777778	0.227884
Com_2039_pos	lignarenone-B	C15 H16 O	212.12	13.112	Full match	Invalid mass	No results	6.82899e+06	7.0902e+06	6.16641e+06	6.93564e+06	5.98933e+06	4.5553e+06	6.76826e+06	6.6002e+06	7.52305e+06	7.2746e+06	7.5594e+06	7.61677e+06	0.866726	-0.206352	0.0760677	0.833333	0.200204
Com_203_pos	Triisopropyl{[5-(1-pyrenyl)-1-pentyn-1-yl]oxy}silane	C30 H36 O Si	440.251	12.611	Full match	No results	No results	111342	93224.4	111379	92505.9	78964.3	88033.3	41803.1	56160.1	26380.4	33930.2	98310.4	62486	1.80352	0.850815	0.0155195	0.888889	0.899314
Com_2041_pos	lidoflazine	C30 H35 F2 N3 O	491.274	8.549	Full match	No results	No results	29073.1	40704.7	43676.8	39746.2	34198	31092.3	7692.37	7112.42	6758.38	6408.71	10312.8	6465.7	4.88244	2.2876	1.97282e-08	1	2.08833
Com_2043_pos	Licoricone	C22 H22 O6	382.141	11.399	Full match	No results	No results	16219.2	15712.8	17041.4	14987.9	14750.1	22833.2	18433.2	17481.8	16767.3	17295.2	16333.1	16051.8	0.992011	-0.0115726	0.797189	0.722222	0.024746
Com_2047_pos	L-homomethionine	C6 H13 N O2 S	163.066	1.095	Full match	No results	No results	422998	380173	397107	436609	426908	432964	214948	226517	231555	152024	342975	286584	1.71645	0.779432	0.00344687	1	0.752205
Com_2054_pos	L-Glutathione (reduced)	C10 H17 N3 O6 S	307.083	1.419	Full match	Full match	No results	233255	243772	239784	211552	188127	226848	2.66045e+07	8.85559e+06	1.67515e+07	2.18446e+07	6.66109e+06	1.1905e+07	0.0145034	-6.10747	4.72326e-06	1	5.41871
Com_2056_pos	L-glutamic acid dianion	C5 H7 N O4	145.037	0.554	Not the top hit	No results	No results	1200.29	499.514	2303.35	2381.01	1828.69	1899.58	2968.73	1889.23	2633.79	2405.02	3907.53	2301.35	0.627881	-0.671437	0.0735093	0.861111	0.731152
Com_2058_pos	L-Glutamic acid	C5 H9 N O4	147.053	1.198	Full match	Full match	No results	1.12669e+07	1.33342e+07	1.19736e+07	1.29685e+07	1.10159e+07	1.56838e+07	5.45081e+07	5.50216e+07	6.03856e+07	7.696e+07	7.22942e+07	7.0068e+07	0.195878	-2.35198	2.35254e-09	1	2.14155
Com_2059_pos	L-Fucono-1,5-lactone	C6 H10 O5	162.053	1.312	Full match	Invalid mass	No results	5.83585e+06	6.41991e+06	6.52825e+06	5.93933e+06	6.68989e+06	6.16557e+06	7.71632e+06	6.93585e+06	6.4312e+06	7.02555e+06	5.657e+06	5.41593e+06	0.959087	-0.0602667	0.573559	0.611111	0.0575598
Com_205_pos	Triisopropyl 5-methyl-2-(2-naphthyl)-3-(3-oxobutyl)-1,1,3-indanetricarboxylate	C36 H42 O7	586.296	11.464	Full match	No results	No results	26670.4	29208.2	51734	39459.6	36546.9	34091.9	18500.9	5875.29	28609.2	13244.9	9776.68	13822.9	2.42359	1.27715	0.00500367	0.972222	1.30894
Com_2060_pos	Lexibulin	C24 H30 N6 O2	434.242	14.264	Full match	No results	No results	79272	121121	75874.3	143110	87846.4	123351	205971	122560	37888.3	142529	136109	140558	0.802651	-0.317156	0.60961	0.694444	0.210578
Com_2061_pos	Levulinic acid	C5 H8 O3	116.047	1.318	Full match	Invalid mass	No results	3.56659e+06	4.52206e+06	4.8592e+06	3.70813e+06	3.26643e+06	3.81425e+06	4.27764e+06	3.58689e+06	4.20355e+06	3.7549e+06	5.68587e+06	2.98934e+06	0.968915	-0.0455582	0.846185	0.527778	0.0409432
Com_2064_pos	Levonorgestrel	C21 H28 O2	312.208	11.536	Full match	No results	No results	36007.7	35778	42678.4	48037.4	33027.1	27973.3	35222.6	28513.1	35145.7	31774.4	37044.1	29992.1	1.13056	0.177032	0.242029	0.694444	0.147212
Com_2065_pos	leu-lys	C12 H25 N3 O3	259.189	1.334	Full match	No results	No results	172516	127062	136975	173278	116334	119856	56984.2	36632.6	41345.5	39455.5	110273	50734.7	2.52223	1.3347	0.0010097	1	1.30606
Com_2067_pos	Leu-Leu	C12 H24 N2 O3	244.178	8.217	Full match	Invalid mass	No results	2.81636e+06	2.99365e+06	2.8667e+06	3.42479e+06	2.45292e+06	2.41583e+06	675993	465291	341104	556038	1.07018e+06	500409	4.70218	2.23333	6.30587e-05	1	2.11199
Com_2069_pos	Leukotriene E4	C23 H37 N O5 S	439.241	10.678	Full match	No results	No results	145370	287117	446483	342737	359822	274511	138057	171891	221250	136609	67546.7	178648	2.03068	1.02196	0.0110183	0.916667	0.969332
Com_2070_pos	Leukotriene B4	C20 H32 O4	336.228	13.667	Full match	No results	No results	8253.66	7707.85	969199	10618.7	16639.6	13437.3	15318.7	17372.7	14577.2	20412.9	34771.2	13015	8.88436	3.15127	0.772563	0.722222	0.452207
Com_2071_pos	Leucyl-leucyl-norleucine	C18 H35 N3 O4	357.262	9.722	Full match	No results	No results	494397	484614	472493	589718	434359	444426	41649.3	32822.5	28427.9	37887.7	87488.4	34406.6	11.1161	3.47458	8.96254e-06	1	3.26001
Com_2074_pos	leucoline	C9 H7 N	129.058	0.562	Full match	No results	No results	5059.81	2483.93	4540.92	2325.05	2384.41	4334.38	2227.74	4611	4272.72	3755.62	3704.94	3497.41	0.957365	-0.0628588	0.694183	0.472222	0.0982317
Com_207_pos	Triisopropyl 3-(4-fluorobenzyl)-6-methoxy-2-(4-methoxyphenyl)-1,1,3-indanetricarboxylate	C36 H41 F O8	620.279	12.496	Full match	No results	No results	33271	36042	37768.8	41662.1	38155.3	37200.6	38067.2	50549.1	44443.7	32538	40656.5	44840.9	0.892488	-0.164095	0.16678	0.75	0.141527
Com_2080_pos	L-Ethionine	C6 H13 N O2 S	163.066	1.669	Full match	Invalid mass	No results	251724	282636	179820	304212	210288	205734	279334	89351	324400	145053	603885	76651.1	0.944518	-0.0823503	0.599365	0.555556	0.295351
Com_2082_pos	Lercanidipine	C36 H41 N3 O6	611.298	11.467	Full match	No results	No results	5224.94	4547.6	5586.57	7341.6	9270.36	4913.89	7279	8551.89	7287.44	7658.89	5872.99	6588.91	0.853046	-0.229305	0.175955	0.722222	0.243457
Com_2083_pos	leonurusoleanolide E	C39 H56 O7	636.401	14.718	Full match	No results	No results	13868.1	12078.8	22648.2	20178.1	15477.6	8003.84	16424.1	26169.6	40003.1	20847.2	37146.4	23435.2	0.56244	-0.83023	0.0184809	0.916667	0.766365
Com_2084_pos	Lemmatoxin	C48 H78 O18	942.515	14.528	Full match	No results	No results	1.36275e+06	1.83619e+06	2.3332e+06	1.89094e+06	1.39071e+06	1.76475e+06	1.94059e+06	3.65674e+06	3.25548e+06	3.06183e+06	2.54102e+06	3.22735e+06	0.598232	-0.741224	0.00221863	0.972222	0.671255
Com_2085_pos	Leiokinine A	C14 H17 N O2	231.125	8.693	Full match	Not the top hit	No results	468922	584904	36759.2	257859	575474	49335.1	58884.2	90017.1	37520	91278.4	51796	122713	4.36359	2.12551	0.0930471	0.694444	1.41834
Com_2086_pos	Lecanoricacid	C16 H14 O7	318.073	7.295	Full match	No results	No results	16584.4	14021.6	21755.7	14693.4	21152	28817.1	36941.1	38022.9	34524	43994.9	16694.6	29046.9	0.5874	-0.767586	0.0165809	0.916667	0.695602
Com_2088_pos	L-Cysteinylglycine	C5 H10 N2 O3 S	178.041	1.424	Full match	No results	No results	28854.4	32772.9	33242.7	26254.6	30656.7	44367.6	464040	207659	366107	489044	153769	276534	0.100221	-3.31874	1.89039e-05	1	2.93438
Com_2089_pos	lawsone	C10 H6 O3	174.031	12.675	Full match	Invalid mass	No results	6.01285e+06	2.79207e+06	3.34367e+06	2.88647e+06	3.37174e+06	2.7999e+06	4.01251e+06	2.19667e+06	2.8479e+06	3.56965e+06	3.24464e+06	3.18768e+06	1.11268	0.154045	0.58248	0.5	0.110098
Com_208_pos	Triisopropyl 2-(3-fluorophenyl)-6-methyl-3-(3-methyl-2-buten-1-yl)-1,1,3-indanetricarboxylate	C33 H41 F O6	552.291	11.351	Full match	No results	No results	432814	279922	308900	383621	406540	527462	23671.5	20639.9	18917.7	20703.9	27063.3	16294.7	18.3773	4.19985	8.37404e-10	1	3.8138
Com_2094_pos	Laurophenone	C18 H28 O	260.213	13.838	Full match	Invalid mass	No results	9.46652e+06	1.02918e+07	1.16806e+07	1.31497e+07	9.42044e+06	1.02524e+07	1.3277e+06	1.82357e+06	1.07969e+06	1.16253e+06	3.62183e+06	1.60661e+06	6.04989	2.59691	6.59785e-05	1	2.4796
Com_2096_pos	Laurolactam	C12 H23 N O	197.178	14.613	Partial match	Full match	No results	3.27587e+06	2.94447e+06	3.05777e+06	2.84258e+06	2.55289e+06	3.33829e+06	2.97599e+06	2.71915e+06	2.05541e+06	3.1777e+06	4.0775e+06	2.69005e+06	1.01786	0.0255413	0.73888	0.583333	0.0849172
Com_2097_pos	Lauramide	C12 H25 N O	199.193	13.622	Full match	No results	No results	4.62371e+06	3.3138e+06	3.99283e+06	3.14148e+06	3.71474e+06	4.55573e+06	4.75418e+06	3.99589e+06	3.98722e+06	5.21979e+06	5.88919e+06	4.40242e+06	0.826314	-0.275237	0.0614877	0.805556	0.254777
Com_2098_pos	latrunculin B	C20 H29 N O5 S	395.178	8.196	Full match	No results	No results	211981	100667	62162.7	91834.3	168082	102341	562076	160979	202752	612370	214896	160620	0.385154	-1.37649	0.0198588	0.861111	1.14342
Com_2099_pos	Latrunculin A	C22 H31 N O5 S	421.194	6.923	Full match	No results	No results	7961.74	4998.86	5766.19	4096.86	3709.84	4167.32	4763.07	4144.92	4156.3	4561.37	4570.58	4205.29	1.16284	0.217656	0.361477	0.555556	0.154046
Com_20_pos	zinniol	C15 H22 O4	266.151	8.043	Full match	No results	No results	24587.9	22539.6	25021.9	32326.5	31471.7	23518.4	24510.6	14829.6	35321.7	33395.7	18151.2	17561.5	1.10917	0.149482	0.386627	0.611111	0.221283
Com_2100_pos	Latanoprost	C26 H40 O5	432.286	13.097	Full match	Invalid mass	No results	1.11574e+07	1.18698e+07	1.20309e+07	1.44414e+07	1.24173e+07	1.49172e+07	1.42149e+07	1.31262e+07	1.32024e+07	7.53781e+06	1.06147e+07	1.43727e+07	1.05153	0.0724927	0.562283	0.444444	0.089524
Com_2102_pos	L-Aspartic acid	C4 H7 N O4	133.037	1.186	Full match	Full match	No results	6.64143e+06	5.17277e+06	5.33305e+06	5.73534e+06	5.70711e+06	4.93824e+06	4.29964e+06	5.8939e+06	5.14022e+06	7.14178e+06	1.07235e+07	6.38253e+06	0.847059	-0.239466	0.37978	0.638889	0.203422
Com_2104_pos	laserpitin	C25 H38 O7	450.261	11.583	Full match	Invalid mass	No results	508004	504060	509190	472757	520937	580451	173241	500074	549617	384711	273428	290380	1.4255	0.511465	0.0595137	0.833333	0.560083
Com_2107_pos	L-Arginyl-L-arginyl-L-arginine	C18 H38 N12 O4	486.315	7.922	Full match	No results	No results	4113.51	4358.74	3025.36	3047.4	3823.54	3235.71	19898.9	19253.9	10950.2	24193.8	41638.8	31595.5	0.146439	-2.77163	7.3363e-05	1	2.43731
Com_2108_pos	LAPPAOL C	C30 H34 O10	554.214	8.713	Full match	No results	No results	33617.1	27295.1	39381.3	29507	29843.2	25723.6	44685	55061.1	45314.2	33565.7	25370.7	32148.3	0.784972	-0.349286	0.135387	0.722222	0.294932
Com_2109_pos	LAPPAOL B	C31 H34 O9	550.22	9.675	Full match	No results	No results	29361.9	30146.9	55240.2	157417	23548	48198.9	196879	31728.4	69996.5	52479	27446.7	26836.7	0.8484	-0.237183	0.79937	0.555556	0.199582
Com_210_pos	Trigonelline	C7 H7 N O2	137.047	1.263	Full match	Full match	Partial match	2.17831e+08	1.92882e+08	1.68688e+08	1.76716e+08	1.82062e+08	1.87101e+08	1.60838e+08	1.69019e+08	1.61415e+08	1.20464e+08	1.78786e+08	1.69134e+08	1.17259	0.229693	0.0406205	0.888889	0.219458
Com_2112_pos	Lansoprazole	C16 H14 F3 N3 O2 S	369.075	1.328	Full match	No results	No results	51623.3	55871.4	57885	53584	54908.5	48302.7	304108	181210	210063	204792	163847	124538	0.271063	-1.8833	8.94463e-05	1	1.66895
Com_2113_pos	Landomycin J	C43 H54 O17	842.34	11.907	Full match	No results	No results	13142.7	14506.4	18830.8	16129.4	23082	19512	9028.83	16357.3	25145.6	15513.8	15816.5	6632.1	1.18882	0.249527	0.289444	0.638889	0.320701
Com_2114_pos	L-Alanyl-N~5~-(diaminomethylene)-L-ornithine	C9 H19 N5 O3	245.149	12.361	Full match	No results	No results	218010	180433	237078	160358	196331	253963	225339	245983	226172	186954	168614	150247	1.03562	0.0504959	0.727382	0.555556	0.0598716
Com_2115_pos	L-Alanyl-3-{[(2E)-4-amino-4-oxo-2-butenoyl]amino}-L-alanine	C10 H16 N4 O5	272.113	5.641	Full match	Invalid mass	No results	5564.23	9291	31069	22978.8	10285	12794	207430	148940	207279	370844	205311	257534	0.0658267	-3.92518	1.75916e-05	1	3.73841
Com_2117_pos	Lacinilene C 7-methyl ether	C16 H20 O3	260.14	9.486	Full match	No results	No results	14821.6	14278.4	10163.6	9906.32	12236.6	8730.61	10854	8600.07	13255.7	17354.5	10473.8	9171.53	1.00613	0.00882118	0.907088	0.527778	0.0522569
Com_211_pos	Triflusal	C10 H7 F3 O4	248.029	1.189	Full match	No results	No results	3.90672e+06	3.46254e+06	4.29198e+06	3.90677e+06	3.43539e+06	2.71871e+06	6.59996e+06	4.72548e+06	4.15985e+06	6.83523e+06	3.58598e+06	3.10818e+06	0.74866	-0.417618	0.120364	0.75	0.342805
Com_2121_pos	Labetalol	C19 H24 N2 O3	328.178	8.16	Full match	No results	No results	156043	71528.7	51256.4	115301	85042.1	91293.1	12752.7	14998.3	8435.37	14035.7	23989.2	18174.2	6.17483	2.6264	7.11948e-06	1	2.38175
Com_2122_pos	L-3-hydroxykynurenine	C10 H12 N2 O4	224.079	7.443	Full match	Invalid mass	No results	69176.4	124164	115039	65626.5	156568	67857.3	24954.4	160209	50938.8	116272	31242.5	114375	1.20169	0.265063	0.351053	0.638889	0.482837
Com_2123_pos	L-3372	C19 H18 O3	294.125	7.558	Full match	No results	No results	182103	136046	79949.6	70386.9	179677	102700	89581.3	72045.2	78331.5	40284.3	126956	127694	1.40376	0.489299	0.18595	0.722222	0.460563
Com_2124_pos	L-(+)-Valine	C5 H11 N O2	117.079	1.075	Full match	No results	No results	7.67908e+07	8.00819e+07	8.00835e+07	7.57236e+07	7.92456e+07	8.76382e+07	6.1295e+07	7.30547e+07	6.10091e+07	6.36745e+07	5.28119e+07	6.4555e+07	1.27408	0.349455	0.00118257	1	0.324241
Com_2125_pos	L-(+)-Leucine	C6 H13 N O2	131.094	8.5	Full match	No results	No results	89174.1	110593	90079.4	89193.4	58749.2	72433.4	20148.1	19402.7	14005.3	18759.2	34135.6	22676.6	3.95131	1.98233	5.0716e-06	1	1.83001
Com_2127_pos	L-(+)-Alanine	C3 H7 N O2	89.0476	1.185	Full match	No results	No results	1.9624e+06	1.71603e+06	1.41886e+06	1.54365e+06	1.35869e+06	1.27916e+06	385181	423909	384175	470827	596950	581234	3.26456	1.70689	6.25713e-07	1	1.56204
Com_2128_pos	L-(-)-Serine	C3 H7 N O3	105.042	1.188	Full match	No results	No results	2.35461e+06	1.90016e+06	2.00235e+06	1.79366e+06	1.90745e+06	2.23635e+06	2.98111e+06	2.14682e+06	3.07431e+06	3.94672e+06	7.15847e+06	4.07179e+06	0.5216	-0.938985	0.0157359	0.944444	0.774855
Com_2130_pos	kulokekahilide-2	C44 H67 N5 O10	825.487	13.883	Full match	No results	No results	4127.7	3798.53	4108.73	3970.69	4127.65	4516.11	3891.69	3645.43	7366.61	3676.3	3497.42	4105.68	0.941423	-0.0870847	0.842827	0.75	0.0668886
Com_2131_pos	kulkenon	C34 H52 O6	556.375	14.522	Full match	No results	No results	39617.5	39507.6	45039.1	31546.8	51747	56119.7	39825.1	57258.6	65403.5	64770.7	32890.5	52634.2	0.842687	-0.246932	0.291747	0.75	0.230215
Com_2133_pos	k-Strophanthidin	C23 H32 O6	404.219	12.723	Full match	No results	No results	515475	189195	159652	184241	333008	199390	54851.4	87735.5	45499.7	39132.7	66723	42081.3	4.70491	2.23417	9.62461e-05	1	1.96817
Com_2136_pos	kresoxim-methyl	C18 H19 N O4	313.131	8.38	Full match	No results	No results	295648	122459	138006	318241	218801	536679	197816	231383	163002	238308	160364	168119	1.40625	0.491853	0.377332	0.611111	0.306615
Com_2138_pos	kopsiyunnanine-I	C24 H26 N2 O3	390.193	8.451	Full match	No results	No results	89747.8	112210	115361	107028	61568.7	117929	6483.24	8161.65	5477.29	6225.06	5732.62	5610.03	16.0214	4.00193	9.81902e-09	1	3.6285
Com_213_pos	Trifluoroacetyl-cumenol	C11 H11 F3 O2	232.071	8.367	Full match	No results	No results	5364.75	6267.79	4860.24	5232.06	4936.06	5706.31	94973.5	72630.9	65867.2	246481	70025	87263.8	0.0507927	-4.29924	1.99616e-05	1	3.75904
Com_2148_pos	klyxumine A	C24 H40 O8	456.272	14.715	Full match	No results	No results	30360.6	40348.8	36488	39895.1	40764.7	27860.9	25870.5	20899	30244.6	19661.7	19833.3	31262.2	1.45981	0.545781	0.00588567	0.916667	0.51398
Com_2149_pos	klysimplexin A	C26 H42 O7	466.293	11.521	Full match	No results	No results	126972	99077	155863	88211.9	88864.5	87879.6	93555	94976.9	85737.4	42640.3	33254.4	52619.3	1.606	0.683469	0.0361177	0.833333	0.707921
Com_214_pos	Trifluoperazine	C21 H24 F3 N3 S	407.165	7.864	Full match	No results	No results	31363.2	24741.5	29997.6	28583.7	29604.4	26601.7	39669.9	31423	31701.8	25939.7	19628.6	29068.7	0.963143	-0.0541779	0.863671	0.611111	0.0715255
Com_2151_pos	khelloside	C19 H20 O10	408.105	6.647	Full match	No results	No results	9005.23	7544.7	9447.62	10104.6	8032.33	10672.5	10959.9	4291.15	8969.65	10864.8	10498.8	10386.3	0.97921	-0.0303102	0.91429	0.666667	0.0390955
Com_2155_pos	Kebuzone	C19 H18 N2 O3	322.131	8.363	Full match	No results	No results	161527	88663.8	207870	135456	150127	97972.1	148795	109837	90937.8	97743.8	73723.7	66776.4	1.43177	0.517803	0.0724405	0.805556	0.472037
Com_2156_pos	KDM5-C49	C15 H24 N4 O3	308.184	6.11	Full match	No results	No results	30955.4	65882.1	114522	109042	71217.5	15541.8	545185	469743	1.5374e+06	1.27652e+06	125383	950353	0.0830165	-3.59046	0.000620037	1	3.21265
Com_2157_pos	Kaur-16-ene	C20 H32	272.25	12.556	Full match	No results	No results	2.21206e+06	3.16677e+06	3.10577e+06	2.56134e+06	3.09063e+06	1.9756e+06	1.49258e+06	2.97198e+06	1.65495e+06	917964	2.63917e+06	2.08671e+06	1.36969	0.453852	0.0963694	0.805556	0.492527
Com_215_pos	triflumizole	C15 H15 Cl F3 N3 O	345.087	6.38	Full match	No results	No results	8648.21	7485.17	8863.56	10678.1	12621	9382.15	76691.3	13671.3	19136.3	130912	19409.1	22790.3	0.204091	-2.29272	0.0200315	1	1.62275
Com_2160_pos	Karwinaphthol B	C17 H20 O4	288.136	9.042	Full match	Invalid mass	No results	27887	39501.5	22877.8	53525.8	28678.3	20470.9	11965.8	10642.7	10192.3	8971.75	18036.4	22898.9	2.33281	1.22207	0.0022398	0.944444	1.12013
Com_2162_pos	Kanokoside B	C21 H34 O12	478.203	14.118	Full match	No results	No results	187362	133303	113088	167002	140547	300163	22558.8	82016.3	97934.4	104044	67049.4	32930.3	2.56182	1.35717	0.00823086	1	1.3519
Com_2167_pos	kaempferol 3-O-beta-D-glucosyl-(1->2)-beta-D-glucosyl-(1->2)-beta-D-glucoside	C33 H40 O21	772.205	8.305	Full match	No results	No results	32695.4	56085.3	44871	57830.7	45105.1	42961.7	74019.5	23354	27567.1	15088.1	15041.6	40546.1	1.42907	0.515075	0.102228	0.805556	0.681786
Com_2168_pos	Kaempferol 3-O-[6-(4-coumaroyl)-beta-D-glucosyl-(1->2)-beta-D-glucosyl-(1->2)-beta-D-glucoside]	C42 H46 O23	918.241	11.24	Full match	No results	No results	1429.71	1325.73	1777.96	4171.41	1506.61	1564.89	9222.78	2612.97	2217.9	1401.23	1182.16	3318.11	0.590139	-0.760874	0.324102	0.611111	0.484756
Com_2169_pos	kabiramide K	C46 H66 N4 O12	866.465	14.117	Full match	No results	No results	50809.2	49295	35792.5	57997.7	54839.1	92986.8	18701.9	25504.9	45187.2	50999.6	71685.3	22200	1.4586	0.544588	0.109475	0.75	0.607985
Com_216_pos	triflubazam	C17 H13 F3 N2 O2	334.093	8.798	Full match	No results	No results	79258.9	132054	158204	184860	134695	148082	69180.9	55820.3	46701.4	43145.1	61800.2	68185.6	2.4277	1.27959	0.000192715	1	1.14521
Com_2170_pos	Juvenile hormone III bisepoxide	C16 H26 O4	282.182	15.907	Full match	No results	No results	7215.59	3176.24	4887.54	5850.96	6363.52	4032.75	1386.81	1433.01	1411.28	1393.36	1306.51	1260.28	3.84881	1.94441	0.000106819	1	1.72378
Com_2172_pos	Juvenile hormone III	C16 H26 O3	266.188	14.982	Full match	No results	No results	46752.6	52921.3	52561.5	40629	41618.6	38905.4	50195.7	45878	51626.6	32043.2	34358.1	36077	1.09277	0.127994	0.352545	0.694444	0.139272
Com_2174_pos	Joro spider toxin-4	C28 H48 N10 O7	636.371	14.309	Full match	No results	No results	375002	515153	617537	682034	442712	404000	65156.4	130190	78839.5	45624.4	121386	65814.5	5.9889	2.58229	1.01255e-05	1	2.40894
Com_2176_pos	jesaconitine	C35 H49 N O12	675.327	12.064	Full match	Invalid mass	No results	1.32154e+06	1.46671e+06	2.24466e+06	1.34302e+06	1.83271e+06	1.49555e+06	1.00762e+07	1.49346e+07	1.95298e+07	1.2294e+07	5.49982e+06	8.97228e+06	0.13609	-2.87736	2.26907e-05	1	2.54703
Com_2177_pos	jaspamide M	C35 H43 Br N4 O6	694.239	8.841	Full match	No results	No results	44097.1	50224.7	57625.3	47137.6	57688.3	47267.4	84978.7	79989.8	78291.3	14062.1	44409	70038.5	0.81782	-0.290145	0.846768	0.694444	0.0766386
Com_2179_pos	Jasmonic acid	C12 H18 O3	210.125	9.176	Full match	No results	No results	349762	328584	354326	350498	362415	477860	126383	124971	142703	147376	136287	118783	2.79151	1.48105	1.30923e-07	1	1.34335
Com_2186_pos	Jasmonal	C14 H18 O	202.136	10.071	Full match	No results	No results	105046	112455	123454	105593	85084.8	103813	106696	61752.6	99938.4	187355	77943.3	118199	0.974784	-0.0368459	0.859965	0.555556	0.129105
Com_2187_pos	jamaicamide A	C27 H36 Br Cl N2 O4	566.152	9.369	Full match	Invalid mass	No results	7.05091e+06	7.38505e+06	7.52512e+06	7.80495e+06	8.02978e+06	7.6655e+06	3.07865e+06	3.45461e+06	2.00891e+06	2.67185e+06	6.68555e+06	3.66772e+06	2.10788	1.07579	0.00399534	1	1.08025
Com_218_pos	Tricyclo[6.3.1.0~2,7~]dodeca-2,4,6-trien-10-one	C12 H12 O	172.089	10.079	Full match	Invalid mass	No results	9194.99	11553.6	12546.1	10648.8	10678.3	10028.9	9135.82	8157.55	10491.4	7342.81	10911.2	10207	1.14943	0.200925	0.0960555	0.777778	0.189836
Com_2191_pos	Jadomycin B	C30 H31 N O9	549.199	8.452	Full match	No results	No results	404428	353858	321802	287868	445620	384228	134732	402335	106114	177510	130394	200032	1.90928	0.933029	0.0104537	0.888889	0.973675
Com_2192_pos	J2I9Y46AHB	C22 H29 F O5	392.201	8.072	Full match	Not the top hit	No results	65262	89147.1	96434.7	63134.1	66462.8	86432.7	111928	65916.5	108079	125709	167350	99740.2	0.687871	-0.53979	0.0418602	0.888889	0.461611
Com_2194_pos	IY9RJD7JGI	C18 H20 Cl2 N2 O3	382.087	6.406	Full match	No results	No results	80848.3	94578.6	106076	154845	126432	108726	82228.9	114892	101635	66620.9	83498.7	90675.7	1.24456	0.315641	0.109134	0.75	0.27853
Com_2195_pos	Ixabepilone	C27 H42 N2 O5 S	506.283	11.279	Full match	No results	No results	28064.7	22415.4	9050.63	32989	23679.9	37797.6	7099.32	20956.2	15122	3493.32	8683.04	10010.1	2.35599	1.23634	0.0195051	0.916667	1.21619
Com_2196_pos	Ivabradine	C27 H36 N2 O5	468.263	9.043	Full match	No results	No results	4193.82	3868.34	4021.97	4131.95	3854.96	4073.39	4037.9	3645.69	5463.55	3922.86	3694.53	3574.55	0.992003	-0.011584	0.969425	0.694444	0.0292558
Com_2198_pos	Itaconic acid	C5 H6 O4	130.026	1.522	Full match	No results	No results	1.97482e+06	455820	1.89055e+06	2.47463e+06	833971	1.84297e+06	768284	660919	895010	867746	1.44424e+06	1.07761e+06	1.65787	0.729332	0.218313	0.722222	0.522576
Com_2200_pos	Istamycin B1	C18 H35 N5 O6	417.26	14.503	Full match	No results	No results	80354.5	59291.2	65190.1	89296.7	85485.5	81645	28954.4	26062.9	46277.1	24909.5	23734.3	21251.3	2.69446	1.43	4.6861e-05	1	1.33525
Com_2201_pos	Isovanillic acid	C8 H8 O4	168.042	6.24	Partial match	Full match	Full match	147129	132388	140081	157194	105439	166442	248162	165554	169102	219240	118284	123543	0.812996	-0.298681	0.227702	0.694444	0.243285
Com_2206_pos	Isotretinoin	C20 H28 O2	300.208	11.531	Full match	Full match	No results	2.49768e+06	2.39894e+06	2.92251e+06	2.38857e+06	2.38118e+06	2.90991e+06	3.58078e+06	2.09697e+06	2.35597e+06	2.1091e+06	1.59822e+06	1.57417e+06	1.16399	0.219081	0.196481	0.833333	0.260406
Com_2209_pos	Isorhapontigenin	C15 H14 O4	258.089	7.69	Partial match	Full match	No results	14165.9	12178	15859.6	10217.5	14339.6	14870.2	16326.8	14342.4	16388.5	14038	11957.6	17452.8	0.901936	-0.148903	0.250815	0.694444	0.154108
Com_2212_pos	isorhamnetin 3-glucoside	C22 H22 O12	478.11	9.54	Full match	Invalid mass	No results	3.05978e+06	3.62543e+06	3.67939e+06	4.18881e+06	2.94544e+06	3.60159e+06	3.62658e+06	4.05311e+06	3.46504e+06	2.84696e+06	3.92699e+06	3.83667e+06	0.969896	-0.0440981	0.686265	0.583333	0.0548926
Com_2215_pos	Isorhamnetin	C16 H12 O7	316.057	9.534	Full match	Full match	Full match	6.4681e+06	6.84403e+06	6.80352e+06	7.43944e+06	6.52214e+06	6.46314e+06	7.55077e+06	7.09059e+06	6.53367e+06	4.55684e+06	4.20272e+06	7.08192e+06	1.0952	0.131191	0.321468	0.527778	0.159287
Com_2218_pos	Isoquinoline	C9 H7 N	129.058	6.295	Full match	Full match	No results	1.39506e+06	1.08849e+06	959762	1.32393e+06	970267	1.05409e+06	1.24029e+06	1.58935e+06	1.59036e+06	1.23466e+06	173699	1.8457e+06	0.885008	-0.176238	0.841692	0.722222	0.299456
Com_221_pos	trichodermatide B	C16 H24 O4	280.167	12.551	Full match	Invalid mass	No results	2.75659e+06	3.49278e+06	3.5813e+06	3.89436e+06	4.25643e+06	2.15135e+06	1.7684e+06	3.62793e+06	1.55631e+06	1.08844e+06	2.35113e+06	2.35382e+06	1.57954	0.659501	0.0336056	0.833333	0.66429
Com_2221_pos	isoquercetin	C21 H20 O12	464.095	8.306	Full match	No results	No results	311541	304487	287686	398600	239388	230147	320645	172959	162148	101885	58081.8	222514	1.7066	0.771125	0.0442294	0.861111	0.875862
Com_2223_pos	ISOPROPYLIDENEDIPHENYL BISOXYHYDROXYPROPYL METHACRYLATE	C29 H36 O8	512.24	13.189	Full match	No results	No results	42684	40151.5	39909.4	41975.9	37263.6	42126.7	42447.2	42365.4	43726	39495.3	41755.6	43135.8	0.965151	-0.0511731	0.186679	0.722222	0.0482289
Com_2226_pos	Isopropyl unoprostone	C25 H44 O5	424.32	14.281	Full match	Invalid mass	No results	11114.2	10471	7419.62	9591.28	8697.54	8427.55	3897.27	11861.8	10865	9382.7	4137.97	4863.09	1.23803	0.30805	0.205049	0.611111	0.409527
Com_2228_pos	Isopropyl 2-{4-[4-(difluoromethyl)benzoyl]phenoxy}-2-methylpropanoate	C21 H22 F2 O4	376.148	10.411	Full match	No results	No results	6618.62	21631.3	4327.8	4560.02	7756.08	6477.49	5145.01	3263.47	4113.29	4782.45	3562.56	3323.56	2.12363	1.08653	0.0537314	0.888889	0.78883
Com_222_pos	TRICHODERMAKETONE A	C16 H24 O5	296.162	10.419	Full match	Invalid mass	No results	1.96226e+06	1.30709e+06	918417	1.16961e+06	1.16197e+06	1.31961e+06	467014	694189	582808	427529	482822	514577	2.47368	1.30666	5.40179e-05	1	1.17197
Com_2230_pos	Isopimpinellin	C13 H10 O5	246.054	9.001	Full match	No results	No results	12506.5	6839.82	11011.7	13722.5	10184	7974.2	26295.7	18759.9	15822.9	11862.5	13401.5	14817.4	0.616469	-0.697899	0.0131016	0.916667	0.627304
Com_2232_pos	Isophorone	C9 H14 O	138.104	14.892	Partial match	Full match	No results	3.1571e+06	3.56615e+06	3.11297e+06	2.86902e+06	3.45102e+06	3.47953e+06	3.48486e+06	2.65567e+06	3.10523e+06	3.50915e+06	4.48535e+06	3.10643e+06	0.965061	-0.0513078	0.759481	0.5	0.0466028
Com_2236_pos	isopentenyl diphosphate	C5 H12 O7 P2	246.007	1.024	Full match	No results	No results	1.09304e+07	9.64175e+06	9.23169e+06	6.78553e+06	1.10092e+07	1.13825e+07	8.32461e+06	1.00263e+07	8.38578e+06	1.20582e+07	7.54054e+06	1.20858e+07	1.00958	0.0137596	0.917271	0.5	0.0492743
Com_2237_pos	Isopelletierine	C8 H15 N O	141.115	14.612	Full match	Invalid mass	No results	1.36453e+06	1.53354e+06	1.26008e+06	1.21537e+06	1.33337e+06	1.47071e+06	1.27357e+06	1.17886e+06	1.12468e+06	1.42778e+06	1.86947e+06	1.17864e+06	1.01547	0.022152	0.752626	0.666667	0.0704182
Com_2238_pos	isomigrastatin	C27 H39 N O7	489.272	12.104	Full match	No results	No results	31599.6	127017	214001	42529.5	82367	21771.2	20744.4	452145	181196	112102	22758.8	234163	0.507556	-0.978362	0.486052	0.611111	0.690114
Com_2239_pos	ISOFENPHOS	C15 H24 N O4 P S	345.118	8.706	Full match	Invalid mass	No results	242604	273607	272089	363795	237020	319108	292110	279335	188510	385567	708341	329207	0.782486	-0.353863	0.405012	0.694444	0.276332
Com_223_pos	trichocladinol F	C11 H16 O5	228.099	12.681	Full match	Invalid mass	No results	483711	604107	646934	628499	623555	498721	348163	257198	404195	321199	249938	407376	1.75322	0.81001	0.000443372	1	0.76306
Com_2240_pos	iso-echinofuran	C15 H18 O	214.136	8.564	Full match	No results	No results	3872.96	3402.74	6977.79	5798.35	4423.9	4781.16	5641.95	5798.89	6379.72	5357.22	3841.47	4387.14	0.931558	-0.102282	0.534495	0.583333	0.140761
Com_2241_pos	Isocyanocyclohexane	C7 H11 N	109.089	8.212	Full match	No results	No results	9261.78	10211.9	9140.92	7907.44	8265.98	8986.97	10206.8	10010.6	9878.87	10716.9	7653.49	7874.99	0.954446	-0.0672648	0.563863	0.583333	0.0685489
Com_2242_pos	isobrucein A	C26 H34 O11	522.211	12.239	Full match	No results	No results	52070.5	51569.1	63261.9	59649.2	43266.6	54097.2	64758.6	32548.8	41886	83680.8	111543	56053.8	0.829547	-0.269604	0.582697	0.611111	0.158631
Com_2245_pos	irisflorentin	C20 H18 O8	386.102	10.555	Full match	No results	No results	157142	127140	113568	143832	113025	128723	42635.9	107938	69314.1	28227.5	32495.1	43247.6	2.41905	1.27444	0.00391687	1	1.29829
Com_2246_pos	Iriomoteolide 1a	C29 H46 O7	506.324	14.793	Full match	No results	No results	253797	246162	304583	220510	273144	270588	184561	80291.9	139595	152393	102950	125886	1.99673	0.99764	0.0011298	1	0.95877
Com_2247_pos	Irinotecan	C33 H38 N4 O6	586.278	11.781	Full match	No results	No results	21713.8	36907.1	24639.6	47305.1	21224.9	27465.5	108563	73281.9	64695.3	60472.5	41277.8	57684.2	0.441545	-1.17937	0.00121056	0.972222	1.07622
Com_2248_pos	Iridin	C24 H26 O13	522.136	11.153	Full match	No results	No results	13022.7	22319.9	33404.2	30112.6	26189.5	27271.2	25988.4	26826.6	18770	24743.5	14852.6	14351.9	1.21339	0.27904	0.328325	0.722222	0.261501
Com_2249_pos	ircinolin A	C21 H34 O6	382.234	11.515	Full match	No results	No results	29418.4	15082.5	12591.2	16995.2	16566.5	23406.4	5083.93	8440.34	12466.7	9795	7035.38	5686.67	2.35137	1.2335	0.000991152	1	1.13197
Com_224_pos	triacetic acid	C6 H8 O4	144.042	1.313	Full match	Invalid mass	No results	2.0926e+07	1.62701e+07	1.96506e+07	2.07696e+07	2.05707e+07	1.90311e+07	2.79952e+07	2.52681e+07	1.80976e+07	2.42962e+07	1.94538e+07	1.78753e+07	0.881431	-0.18208	0.228828	0.611111	0.150536
Com_2255_pos	iotrolan	C37 H48 I6 N6 O18	1625.73	13.545	Full match	No results	No results	26302.7	29179.4	32681.2	25241.8	17043.6	23708	46973.4	51285.5	39910.2	52963.3	43556.8	48743.2	0.543892	-0.878609	0.00040854	1	0.819981
Com_2257_pos	Iodixanol	C35 H44 I6 N6 O15	1549.71	12.8	Full match	No results	No results	68421.2	50459.6	92522.6	42464.6	32643	61486.7	62800.7	50205.5	53635.9	87128.6	58950.9	30896.8	1.01274	0.0182707	0.990874	0.472222	0.0471167
Com_2258_pos	inotilone	C12 H10 O4	218.058	8.201	Full match	Invalid mass	No results	128651	139860	125609	137391	112535	169010	96454.7	167858	102647	103760	123411	160536	1.07737	0.107513	0.441859	0.694444	0.130413
Com_2259_pos	Inokosterone	C27 H44 O7	480.308	12.351	Full match	No results	No results	40071.4	25566.6	49765	38510.3	24610.2	51151.7	58734.9	77248.5	59673.6	53917	40264.2	57388.9	0.661456	-0.596284	0.0212549	0.944444	0.572963
Com_2260_pos	ingliforib	C23 H24 Cl N3 O5	457.14	8.501	Full match	No results	No results	12442.8	14470.5	17718.2	20428.5	9518.42	24678.7	11677.6	15241.3	13225.7	8320.23	7355.79	8644.87	1.53969	0.622643	0.0475718	0.833333	0.551082
Com_2261_pos	Indoprofen	C17 H15 N O3	281.104	7.987	Full match	No results	No results	76400.7	47037.1	42948.4	52661.9	54734.1	78788.1	27018.9	34468.5	19835.5	28025.9	12690.1	31648.8	2.29407	1.19791	0.00123503	1	1.12557
Com_2262_pos	indometacin	C19 H16 Cl N O4	357.078	13.046	Full match	No results	No results	36142.2	23068.8	25588.7	32339	19739.6	38012.7	47593.5	34758.2	45244.5	27041.1	41560.6	40379.3	0.739255	-0.435856	0.0461052	0.861111	0.416956
Com_2263_pos	Indoline	C8 H9 N	119.073	7.043	Full match	No results	No results	84747.1	89353.3	82018.3	100640	78424.3	87636.1	112618	79535.4	90032.8	86445.4	93453.5	129851	0.883234	-0.179132	0.212342	0.722222	0.148421
Com_2265_pos	Indole-5,6-quinone	C8 H5 N O2	147.032	7.426	Full match	Invalid mass	No results	1.57603e+06	3.42548e+06	2.78963e+06	3.42178e+06	2.93648e+06	2.58126e+06	1.63619e+06	4.04497e+06	3.029e+06	1.07868e+06	2.20581e+06	2.02134e+06	1.19368	0.255422	0.323886	0.638889	0.308662
Com_2266_pos	Indole-3-butyric acid	C12 H13 N O2	203.094	8.707	Full match	No results	No results	137865	121919	185786	166476	97333.3	153808	139199	145740	115710	163038	254732	194829	0.851903	-0.231239	0.339116	0.638889	0.212404
Com_2267_pos	Indole-3-acetic acid	C10 H9 N O2	175.063	5.929	Full match	Invalid mass	No results	246462	192422	489976	118300	401653	158053	310453	117844	132258	331840	93767.1	106915	1.47004	0.555854	0.241008	0.75	0.592181
Com_2269_pos	Indole-3-acetaldehyde	C10 H9 N O	159.068	6.304	Full match	No results	No results	531714	409904	349114	479340	382002	375462	468338	514341	617492	600502	962179	712870	0.652145	-0.616735	0.0096774	0.916667	0.551859
Com_226_pos	Tri-2,5-cyclohexadien-1-ylsilane	C18 H22 Si	266.148	8.453	Full match	No results	No results	26435.2	20617.5	29237.6	25932	20932.5	20697.3	85804.5	24711.5	39472.2	60587.6	33145.1	35502	0.515188	-0.95683	0.0230019	0.916667	0.773481
Com_2270_pos	Indole	C8 H7 N	117.058	6.3	Full match	Full match	No results	4.38904e+06	3.58227e+06	3.19586e+06	3.7519e+06	3.04126e+06	3.17735e+06	3.77632e+06	4.41843e+06	5.16887e+06	4.85243e+06	8.6538e+06	5.56394e+06	0.651718	-0.61768	0.0159281	0.972222	0.54107
Com_2271_pos	indol-2-one	C8 H5 N O	131.037	6.522	Full match	Invalid mass	No results	676246	876377	892982	2.36617e+06	2.1298e+06	2.41661e+06	409176	1.05953e+06	806754	397379	1.11421e+06	778102	2.04992	1.03557	0.0539346	0.777778	0.883816
Com_2272_pos	Indicaxanthin	C14 H16 N2 O6	308.1	9.617	Full match	No results	No results	23170.9	15333	13211	19569.6	20226.3	33235.4	14986.4	25000.9	17455.8	14724	18458.2	30895.5	1.02654	0.037793	0.915202	0.555556	0.0880603
Com_2273_pos	Indican	C14 H17 N O6	295.105	6.497	Full match	No results	No results	23382.8	12747.2	19453.5	12760.2	19985.6	13897.5	9932.28	7898.7	6861.21	9130.4	6303.89	5868.11	2.22258	1.15224	0.000228536	1	1.03875
Com_2274_pos	Indene	C9 H8	116.062	11.537	Full match	No results	No results	199139	228657	279818	190900	218629	177405	219982	177233	195582	142017	109523	141465	1.31319	0.393078	0.0460664	0.833333	0.396394
Com_2276_pos	Inabenfide	C19 H15 Cl N2 O2	338.084	11.886	Full match	No results	No results	269259	339177	370543	433458	315003	310321	163176	209060	156613	103643	202089	124498	2.1247	1.08726	0.000315446	1	1.0159
Com_2279_pos	IN00260	C20 H20 O8	388.115	7.254	Full match	No results	No results	41099.6	22712.3	27836.1	21145.2	70228.6	23049.1	15766.2	13451.1	21084.4	17534	15744.9	16082.6	2.06767	1.04801	0.0193875	1	0.836217
Com_2282_pos	IN00216	C14 H13 N O4	259.084	7.395	Full match	No results	No results	39898.7	36680.5	45784.8	53411.5	46719	49432.9	49866	40049.2	45881.9	53625	49498.7	71387.1	0.876315	-0.190478	0.234236	0.75	0.163185
Com_2284_pos	Imperatorin	C16 H14 O4	270.089	9.011	Full match	No results	No results	122014	84389.9	96850.4	90859.8	97062.9	109871	138648	124892	135297	121601	92993	99849.3	0.842654	-0.246988	0.0805416	0.805556	0.222189
Com_2289_pos	Imazapyr	C13 H15 N3 O3	261.111	7.015	Full match	No results	No results	50614.1	47378.9	40989.4	50052.5	43293.8	45770.8	16859.1	20189.6	19186.9	17351.8	30142.9	21362.6	2.22314	1.1526	7.32767e-05	1	1.07416
Com_2290_pos	illicidione B	C29 H36 O8	512.24	11.514	Full match	Invalid mass	No results	31833.5	28175	35685.5	29360.4	28939.6	32792.3	42445.7	41085.5	37856.2	32589.5	28279.8	29015.3	0.884103	-0.177714	0.198376	0.694444	0.153346
Com_2293_pos	idremcinal	C39 H69 N O12	743.481	14.823	Full match	No results	No results	29956.8	17656.3	35345.8	30448.3	35869.6	30884.2	52806.7	92480.9	78105.9	66640.6	71569.7	63305.8	0.423998	-1.23787	9.10911e-05	1	1.14157
Com_2294_pos	Icosyl (2E)-3-(3,4-dihydroxyphenyl)acrylate	C29 H48 O4	460.354	11.28	Full match	No results	No results	30712.4	38952.9	37629.1	28048.3	29385.7	31313.2	24963.1	18709.5	22521.8	23369.4	15223.8	15862.1	1.62488	0.700335	0.00102017	1	0.660412
Com_2297_pos	Icosa-5,8,11,14-tetraenoic acid	C20 H32 O2	304.239	15.385	Full match	No results	No results	63581.9	45503.8	45086.3	61239	68736.2	56344.7	37839.5	38023.4	42316.9	18510.8	26357.3	19613.2	1.86406	0.898451	0.00457521	1	0.870002
Com_2300_pos	icomucret	C20 H32 O3	320.234	11.859	Full match	No results	No results	185550	150814	250816	263755	209365	181286	138486	161631	135168	94071	120394	130077	1.59213	0.670959	0.00243302	0.972222	0.604241
Com_2301_pos	Icilin	C16 H13 N3 O4	311.091	15.212	Full match	No results	No results	46958.9	60350.9	62742	53893.7	61507.7	49354.5	35402.6	38740.1	42113	40867.4	24391.5	50784.2	1.44128	0.527351	0.0103986	0.944444	0.518746
Com_2304_pos	Ibuprofen	C13 H18 O2	206.13	11.544	Full match	Full match	No results	139273	118249	90107.7	90267.8	103695	224204	104351	508956	124266	107396	86727	77388.9	0.758901	-0.398016	0.828815	0.555556	0.128589
Com_2307_pos	ibufenac	C12 H16 O2	192.115	0.599	Full match	No results	No results	252140	133704	200395	201968	182410	209619	209166	158703	149884	226543	210169	157014	1.06186	0.0865952	0.629952	0.527778	0.0791492
Com_2309_pos	Hypoxanthin	C5 H4 N4 O	136.038	1.87	Full match	No results	No results	875874	776287	603648	252491	910148	825959	107228	63041.5	90987.6	75732	179798	49779.7	7.49144	2.90524	2.20869e-05	1	2.65848
Com_2310_pos	hypaphorine	C14 H18 N2 O2	246.136	5.698	Full match	No results	No results	37422.3	54785.9	4625.32	37729.3	32789	4847.86	9002.37	8420.3	10204.9	8980.09	9932.11	19429.4	2.6103	1.38422	0.235786	0.666667	0.827916
Com_2312_pos	Hydroxyvernolide	C19 H22 O8	378.131	7.531	Full match	No results	No results	20321.6	18446.4	20902.6	21793.9	22105.9	34549.6	42124.2	32542.4	33618	48739	27600.2	35696.9	0.626904	-0.673683	0.00307505	0.916667	0.621144
Com_2316_pos	Hydroxypyruvic acid	C3 H4 O4	104.011	11.511	Full match	Invalid mass	No results	20967.6	24796.9	32305	22688.6	23514.3	19069.5	43929	31472.3	30386.5	26999.2	21079.3	32019.4	0.771129	-0.374955	0.0705858	0.777778	0.341911
Com_231_pos	Tretinoin	C20 H28 O2	300.208	9.552	Full match	No results	No results	4399.48	3706.7	4167.55	4127.67	4224.19	4950.38	3593.13	6062.2	6260.24	3246.55	3364.34	2917.2	1.0052	0.00748382	0.736441	0.666667	0.065855
Com_2321_pos	hydroxypyridone	C5 H5 N O2	111.033	14.339	Full match	No results	No results	12926.2	10717.9	14186.3	10389.2	13023.6	13692.8	11232.9	7924.83	4307.44	5072.4	15705.8	10524.2	1.36825	0.452336	0.104129	0.75	0.544424
Com_2322_pos	hydroxyprogesterone caproate	C27 H40 O4	428.291	12.555	Full match	Invalid mass	No results	436989	408088	463526	434658	459135	243713	277980	558927	292601	189944	390192	426141	1.1453	0.195723	0.3774	0.694444	0.235804
Com_2323_pos	Hydroxyprogesterone	C21 H30 O3	330.219	10.864	Full match	No results	No results	53879.5	43194.8	46084.6	32116.2	49512.4	31459.1	55708.9	43363.9	34841.1	34463.4	12011	24436.8	1.25105	0.32314	0.238875	0.638889	0.445404
Com_2328_pos	hydroxychloroquine	C18 H26 Cl N3 O	335.175	14.616	Full match	No results	No results	1.31097e+06	951149	1.1957e+06	997231	775062	1.32054e+06	1.46953e+06	1.28216e+06	913975	1.74387e+06	1.67669e+06	1.26109e+06	0.784761	-0.349674	0.0951611	0.75	0.318025
Com_2329_pos	hydroxyacetone phosphate	C3 H7 O5 P	154.003	1.588	Full match	No results	No results	5263.09	4471.55	8719.65	5238.18	4966.36	6746.71	3195.11	4932.57	3011.88	4101.31	4356.02	4178.54	1.48916	0.574504	0.0130653	0.972222	0.507926
Com_2331_pos	hydroprene	C17 H30 O2	266.224	13.843	Full match	No results	No results	27392.8	24650.1	27335.1	25406.7	22677.2	193126	17845.1	17584.5	19086.3	13159.7	16918.7	18850.7	3.09911	1.63185	0.0830016	1	0.96454
Com_2336_pos	Hydrocortisone Valerate	C26 H38 O6	446.266	12.746	Full match	Invalid mass	No results	7.74987e+06	6.2883e+06	7.41154e+06	5.06641e+06	7.65342e+06	5.5359e+06	7.62535e+06	1.10681e+07	1.07023e+07	8.59813e+06	7.0991e+06	9.72156e+06	0.724359	-0.465223	0.0116289	0.861111	0.425207
Com_2340_pos	Hydrocortisone caproate	C27 H40 O6	460.282	12.184	Full match	Invalid mass	No results	723352	755806	1.2137e+06	876911	1.36347e+06	1.23132e+06	397626	824157	1.03342e+06	654181	605554	674986	1.47128	0.557073	0.0448308	0.861111	0.52546
Com_2347_pos	Hydrocortisone butyrate (JP15/USP)	C25 H36 O6	432.25	11.669	Full match	Invalid mass	No results	399848	366477	450892	459600	404983	487726	118329	164686	284897	238569	217374	197409	2.10399	1.07313	0.00100509	1	1.02131
Com_2351_pos	hydrocortisone aceponate	C26 H36 O7	460.245	10.63	Full match	No results	No results	32593.3	32641.5	38899.3	27932.7	33583.6	24766.4	79155.8	40377	39063.1	43030.6	31874.2	31822.6	0.717678	-0.478591	0.0968121	0.777778	0.387641
Com_2355_pos	Hydroconiferyl Alcohol	C10 H14 O3	182.094	6.511	Full match	Invalid mass	No results	116848	92919.1	78326.8	74289.6	88231.5	87723.9	202354	129249	175421	214761	183315	159477	0.505683	-0.983695	4.61773e-05	1	0.892934
Com_2356_pos	hydrobenzoin	C14 H14 O2	214.099	12.322	Full match	No results	No results	44294.7	34463.6	40136.4	23273.8	33227.2	30927.6	20749.4	32493.9	19446.5	18128.8	17308.6	24143	1.55986	0.641418	0.0067731	0.916667	0.590597
Com_2358_pos	Hydantoin-5-propionic acid	C6 H8 N2 O4	172.048	1.473	Full match	No results	No results	301996	387562	501751	576109	362787	390106	324331	406862	389326	247096	167289	250189	1.41187	0.497602	0.0556648	0.777778	0.493455
Com_2359_pos	hyatelone A	C27 H40 O6	460.282	12.842	Full match	Invalid mass	No results	692706	1.09801e+06	1.24084e+06	750772	1.24612e+06	946761	1.50536e+06	1.65907e+06	1.62897e+06	1.07339e+06	1.4022e+06	1.42262e+06	0.687469	-0.540633	0.0115698	0.916667	0.514255
Com_2360_pos	Hopantenic acid	C10 H19 N O5	233.126	7.257	Full match	No results	No results	253534	357640	411157	352351	336127	338125	233242	290190	254370	186561	200822	318293	1.38117	0.465891	0.0120436	0.916667	0.438308
Com_2365_pos	Homovanillic acid	C9 H10 O4	182.058	6.804	Full match	No results	No results	188762	89343.2	94762	75668.5	89517.6	118560	72903.8	80471.4	69661.8	93633.3	94826.1	61365.7	1.38859	0.473625	0.0894993	0.777778	0.387715
Com_2366_pos	Homosalate	C16 H22 O3	262.156	10.074	Full match	No results	No results	227430	223013	230051	138847	198886	112335	181883	86834.3	97688.8	351893	123099	186650	1.09972	0.137132	0.488096	0.694444	0.273314
Com_2368_pos	Homoplantaginin	C22 H22 O11	462.115	8.09	Full match	Invalid mass	No results	168747	162820	254693	264005	204416	231169	298084	281824	381304	211035	174097	295239	0.783298	-0.352367	0.137889	0.805556	0.313901
Com_2369_pos	Homaline	C30 H42 N4 O2	490.329	14.429	Full match	No results	No results	478364	554462	689464	377534	711616	468440	142736	110408	143105	158827	170839	140863	3.78399	1.91991	2.72708e-06	1	1.73099
Com_2371_pos	His-Leu	C12 H20 N4 O3	268.153	1.794	Full match	Invalid mass	No results	208384	316319	256248	407981	234118	237401	22467.3	28906.2	12472.5	24046	48542	14889.3	10.9729	3.45587	6.8867e-06	1	3.24624
Com_2372_pos	hirsutellide A	C36 H48 N4 O8	664.348	11.665	Full match	No results	No results	17614.5	11602.2	11985.4	12544.9	14156.3	13536.5	8087.12	23862.3	33557.5	17732.6	11795.7	15814	0.73469	-0.444792	0.355439	0.666667	0.283892
Com_2373_pos	Hippuric acid	C9 H9 N O3	179.058	5.44	Full match	No results	No results	5069.93	4097.75	5238.32	2877.83	4914.28	5076.06	5309.84	3461.7	6410.46	6216.3	5498.28	4111.09	0.879594	-0.18509	0.382108	0.75	0.173367
Com_2376_pos	Hexylresorcinol	C12 H18 O2	194.13	12.494	Full match	Invalid mass	No results	246613	281300	311841	438221	322435	334117	220070	278147	258975	150802	246372	211635	1.4162	0.502022	0.0146615	0.944444	0.461981
Com_2379_pos	Hexose	C6 H12 O6	180.063	1.192	Full match	Invalid mass	No results	2.0704e+07	1.92975e+07	1.87064e+07	2.16412e+07	1.67515e+07	1.90483e+07	1.02555e+07	1.18755e+07	5.29439e+06	1.09182e+07	9.88165e+06	4.44847e+06	2.20506	1.14082	0.0035369	1	1.12164
Com_2381_pos	Hexitol	C6 H14 O6	182.079	1.229	Full match	No results	No results	136732	168525	185765	227907	138376	275004	175992	271642	258967	120781	106821	247770	0.957982	-0.0619291	0.958949	0.5	0.0580157
Com_238_pos	Trenbolone Acetate	C20 H24 O3	312.172	11.739	Full match	No results	No results	8.02035e+06	7.53903e+06	7.18313e+06	7.03562e+06	5.96614e+06	8.05633e+06	6.50008e+06	5.23118e+06	4.6334e+06	6.33441e+06	8.86574e+06	6.65729e+06	1.14595	0.196544	0.176426	0.75	0.210195
Com_2392_pos	Hexanal	C6 H12 O	100.089	6.81	Full match	Invalid mass	No results	152219	164087	190931	200333	172530	210280	155045	125548	158787	126289	79197.1	125660	1.41511	0.500917	0.0141137	0.944444	0.4927
Com_2395_pos	Hexakis{(Z)-[(2-methoxy-2-methylpropyl)imino]methyl}technetium	C36 H72 N6 O6 Tc	782.456	15.036	Full match	Invalid mass	No results	965983	1.01069e+06	1.05271e+06	959087	1.11289e+06	900537	640632	1.0772e+06	1.59109e+06	1.07792e+06	1.20411e+06	732124	0.949203	-0.0752109	0.950284	0.611111	0.0158338
Com_2396_pos	Hexahydrocurcumin	C21 H26 O6	374.173	14.374	Full match	Invalid mass	No results	89800.3	84495.8	109980	100329	92877.1	105711	134348	225891	228965	277280	250411	190673	0.446014	-1.16484	0.0002968	1	1.03445
Com_2397_pos	hexahydro-2-oxo-1h-thieno(3,4-d)imidazole-4-pentanoic acid	C10 H16 N2 O3 S	244.088	7.876	Full match	Invalid mass	No results	37096.9	43821	31867.5	35090.9	27717	34057.9	18503.4	27559.6	21315	17873.1	22886.5	33452.3	1.48069	0.566272	0.00738304	0.944444	0.536239
Com_2399_pos	Hexahydro-2H-cyclopenta[b]furan-2-one	C7 H10 O2	126.068	13.044	Full match	Invalid mass	No results	102360	81802.3	66738.1	74848.2	100298	90410.3	72135.7	49474.4	43528.5	71325.7	62358.6	69587	1.40186	0.487337	0.0118935	0.916667	0.452391
Com_2400_pos	Hexadecenal	C16 H30 O	238.229	14.312	Full match	Invalid mass	No results	448514	513420	537516	481745	462146	458774	188772	180501	196846	166684	252188	175594	2.50056	1.32225	1.74719e-06	1	1.21396
Com_2401_pos	hexadecanoylanthranilic acid	C23 H37 N O3	375.276	10.671	Full match	No results	No results	10639.5	8755.18	10159.1	12431.8	8657.48	12486.7	10713	19185.7	11183.8	11743	11381.7	11314	0.835921	-0.258561	0.165237	0.722222	0.227207
Com_2402_pos	HEXADECANOLACTONE	C16 H30 O2	254.224	13.657	Full match	Invalid mass	No results	124942	96985.1	121420	171064	114823	113907	142813	131457	149126	108600	146503	149999	0.896972	-0.156864	0.232244	0.722222	0.159251
Com_2403_pos	Hexadecanamide	C16 H33 N O	255.256	14.776	Full match	Full match	No results	1.15285e+08	2.07701e+08	9.5277e+07	1.12541e+08	1.14661e+08	1.11722e+08	1.51966e+08	1.18065e+08	1.19827e+08	1.19953e+08	1.67959e+08	1.08289e+08	0.963268	-0.053991	0.661815	0.722222	0.0976129
Com_2404_pos	Hex-3-yne	C6 H10	82.0781	14.896	Full match	No results	No results	447769	467671	371883	506296	433119	483438	418691	467214	410696	442208	617714	359259	0.997936	-0.00298128	0.931402	0.638889	0.0927313
Com_2405_pos	Hex-1-yne	C6 H10	82.0781	14.614	Full match	Invalid mass	No results	826318	646195	789750	706087	684567	865142	671993	592393	545813	724540	890946	595009	1.1237	0.168259	0.184635	0.722222	0.170527
Com_2407_pos	Hex-1-enylbenzene	C12 H16	160.125	11.533	Full match	Invalid mass	No results	475599	481782	630037	473258	540415	480428	597456	512204	493548	359170	258019	311848	1.21691	0.283225	0.146914	0.638889	0.325834
Com_2411_pos	hesperetin 7-O-beta-D-glucoside	C22 H24 O11	464.131	8.072	Full match	No results	No results	33299.1	33297.3	46771.8	37229	41189	62149.4	66152.9	43936.8	62617.7	41159.4	26998.4	44580.5	0.889611	-0.168754	0.557265	0.638889	0.180948
Com_2414_pos	Hesperetin	C16 H14 O6	302.078	10.545	Full match	No results	No results	721104	632185	806520	959459	932285	1.32319e+06	86026.1	89933.9	41508.4	68430.9	82157.2	40541.5	13.1541	3.71744	1.75304e-07	1	3.4163
Com_2416_pos	hernsubanine B	C28 H31 N O9	525.199	7.726	Full match	No results	No results	28107.4	19920.6	23786.1	22736.1	20943.4	38505.7	30934.1	30924.2	28298	25879	24766.9	26872.9	0.918438	-0.122745	0.346175	0.75	0.142248
Com_2417_pos	Herniarin	C10 H8 O3	176.047	10.645	Full match	Invalid mass	No results	258753	243079	253278	234674	225685	335164	286590	251626	270627	285155	381505	342971	0.852712	-0.22987	0.0963448	0.833333	0.212689
Com_2419_pos	hernanol	C22 H26 O7	402.167	9.133	Full match	No results	No results	16694.5	16572.2	11107.4	15328.9	10580.5	13637.2	19228.9	19949	14937.5	16884.8	15146.1	16078.8	0.820941	-0.28465	0.0603479	0.777778	0.275846
Com_241_pos	Tremetone	C13 H14 O2	202.099	14.087	Full match	No results	No results	12232.4	11979.7	14985.8	16102.5	18949.6	14131.2	14795.3	19966.2	30305.4	23372.3	18392.9	16101.3	0.718935	-0.476066	0.0379269	0.833333	0.412609
Com_2420_pos	Heptopyranosides	C13 H24 O7	292.153	6.59	Full match	No results	No results	5292.3	4418.49	4900.17	4902.24	4715.22	5377.86	10846.2	5263.7	7971.34	10736.5	13910.9	10989.8	0.495764	-1.01227	0.00448278	0.944444	0.869076
Com_2423_pos	Heptanophenone	C13 H18 O	190.135	9.938	Partial match	Full match	No results	7.29469e+06	7.03723e+06	8.93323e+06	9.1542e+06	7.43941e+06	5.38905e+06	1.11564e+07	1.21004e+06	7.08991e+06	1.02086e+07	3.02201e+06	4.64864e+06	1.21192	0.277297	0.284552	0.611111	0.616753
Com_2425_pos	Heptanal	C7 H14 O	114.104	0.139	Full match	No results	No results	294.452	10678	12006	923.339	16012	8315.26	340.164	3794.4	4461.95	127.454	4815.05	4062.38	2.74007	1.45421	0.327584	0.75	1.26558
Com_2426_pos	heptaminol	C8 H19 N O	145.146	6.236	Full match	Invalid mass	No results	116378	72768.9	103785	120936	81758.6	210217	147510	51751.4	116797	94553	78872.3	98543.5	1.20036	0.263465	0.43637	0.611111	0.23336
Com_2427_pos	Hemibrevetoxin B	C28 H42 O7	490.292	12.303	Full match	No results	No results	270373	231908	293314	214771	246675	246368	136222	259790	219578	86560.3	215515	222950	1.31807	0.398424	0.108466	0.805556	0.442333
Com_242_pos	treloxinate	C16 H12 Cl2 O4	338.011	1.301	Full match	No results	No results	78729.8	60091.1	97693.3	77268.1	57931.6	81572.2	126010	103249	110874	90519.4	89994.5	70498.8	0.766792	-0.383092	0.0440845	0.833333	0.348832
Com_2431_pos	Helminthosporoside A	C39 H64 O22	884.386	11.337	Full match	No results	No results	1085.3	919.009	1049.99	959.815	946.267	1092.95	1193.36	1053.02	1043.3	1108.51	963.918	897.232	0.967087	-0.048282	0.553124	0.611111	0.0438349
Com_2432_pos	Hellebrin	C36 H52 O15	724.329	14.046	Full match	Invalid mass	No results	80582.6	202556	130244	86962.6	108638	60533.4	65904	15749	29034.3	78621.7	49147.2	94410.6	2.01136	1.00817	0.0413386	0.861111	1.04553
Com_2433_pos	Heliotrine	C16 H27 N O5	313.188	7.089	Full match	No results	No results	16695.4	15395.2	6350.94	9729.61	22595.1	8146.66	6447.69	8201.01	5565.21	14240.2	6514.24	6655.97	1.65699	0.728562	0.086642	0.777778	0.608487
Com_2434_pos	Heliettin	C19 H22 O4	314.151	13.106	Full match	No results	No results	33335.7	31057.3	30731.6	36017.5	29591.6	33703.7	33530.7	32129.6	37449.7	31261.3	32749.1	33029.2	0.971461	-0.0417726	0.468019	0.611111	0.0394552
Com_2436_pos	Helenalin	C15 H18 O4	262.12	8.814	Full match	No results	No results	5998.12	6483.45	6069.86	3790.35	4708.26	4751.3	8128.09	5616.47	5179.64	8825.38	6281.76	7036.22	0.774367	-0.368911	0.0588421	0.805556	0.337206
Com_2437_pos	HC Blue No. 1	C11 H17 N3 O4	255.121	1.439	Full match	No results	No results	3.77025e+06	3.05514e+06	3.43825e+06	2.56443e+06	2.92422e+06	4.33814e+06	689630	884437	488939	1.1888e+06	1.1404e+06	1.01707e+06	3.71407	1.893	3.45262e-05	1	1.76309
Com_2438_pos	Haplopine	C13 H11 N O4	245.068	6.253	Full match	No results	No results	16944.8	22179.5	14563.6	25593.4	17486.7	17721.2	7273.32	7962.34	6762.01	7113.72	9967.18	7149.03	2.47664	1.30838	1.02406e-05	1	1.18129
Com_2439_pos	hantupeptin B	C41 H62 N4 O8	738.453	14.827	Full match	Invalid mass	No results	660112	516637	654022	594053	671559	759155	203078	389866	319951	287869	315868	373913	2.03938	1.02813	0.000176861	1	0.955416
Com_243_pos	trehalose 6-phosphate	C12 H23 O14 P	422.082	9.115	Full match	No results	No results	7000.92	198490	19254	12688.8	57299.2	10222.2	18039	6052.73	49965.6	42479.4	49235.8	62510.7	1.33586	0.41777	0.743178	0.555556	0.331154
Com_2442_pos	halisphingosine A	C18 H37 N O3	315.276	12.746	Full match	No results	No results	27922.6	18943.3	29122	18334.6	19726.1	19943.2	28150	26872.7	25426.8	25671.1	29490.4	28335.9	0.817288	-0.291083	0.0479397	0.777778	0.287386
Com_2446_pos	halioxepine	C26 H38 O4	414.276	12.555	Full match	Invalid mass	No results	4.35501e+06	6.12653e+06	7.11669e+06	7.19429e+06	6.32283e+06	3.22335e+06	3.49615e+06	8.62374e+06	4.46104e+06	2.31263e+06	6.22151e+06	5.77875e+06	1.11151	0.152517	0.526139	0.611111	0.216491
Com_2447_pos	hainangranatumin B	C32 H40 O10	584.262	11.389	Full match	No results	No results	4304.96	3822.8	4399.82	3928.23	3764.96	4232.17	11579.1	7768.5	10320.2	6465.39	6385.92	8584.85	0.478494	-1.06343	0.000533006	1	0.938992
Com_2449_pos	gypsogenin 3-O-rhamnosylglucosiduronic acid	C42 H64 O14	792.427	12.622	Full match	No results	No results	202038	212784	169313	234981	258696	196374	140753	182285	105632	142133	214313	155242	1.355	0.438295	0.0242247	0.861111	0.43046
Com_2450_pos	gymnocin-B	C62 H92 O20	1156.62	5.975	Full match	No results	No results	21996.4	18445	20679.4	23386.1	21941.3	15473.8	6391.96	4254.32	8155.14	3059.16	5259.61	4552.22	3.84947	1.94466	4.20854e-05	1	1.82315
Com_2451_pos	GW0742X	C21 H17 F4 N O3 S2	471.058	7.137	Full match	No results	No results	19217.9	16014.8	17927.8	16606.8	16422.6	18985.2	22356	18955.6	19440.5	20367.5	21219.4	19807.2	0.86106	-0.215814	0.00438155	0.944444	0.198302
Com_2453_pos	Gusperimus	C17 H37 N7 O3	387.298	11.67	Full match	No results	No results	83684.8	107734	114314	127547	87178.1	141700	16037.1	13810.8	10634.8	13469.6	31261.9	24759.6	6.02105	2.59001	1.5441e-05	1	2.43135
Com_2455_pos	gukulenin F	C42 H54 O10	718.374	11.832	Full match	No results	No results	54626.5	63952.8	61414.3	56884.3	45827.5	40298.1	99521.9	21813.6	245891	165443	101188	198157	0.388218	-1.36506	0.0970915	0.833333	0.97136
Com_245_pos	Travoprost	C26 H35 F3 O6	500.24	8.621	Full match	No results	No results	135437	105743	144130	140219	118374	115425	67648.6	107773	66436.7	68073.6	30387	42412.5	1.98397	0.98839	0.00721461	0.972222	0.999765
Com_2460_pos	Guanine	C5 H5 N5 O	151.049	7.033	Full match	No results	No results	7944.57	6884.19	8281.05	9901.06	9746.06	7195.33	20053.4	7955.82	6533.54	37888.2	14162	7827.84	0.529039	-0.918555	0.177988	0.638889	0.577051
Com_2466_pos	guaiazulene	C15 H18	198.141	10.08	Full match	No results	No results	30836.7	28541.6	25076.3	19186.1	21177.1	20917.7	27092.1	22911.4	25251.4	31745.2	21365.7	26520.9	0.940916	-0.0878618	0.495983	0.666667	0.102337
Com_2479_pos	granatumin N	C29 H36 O9	528.235	10.65	Full match	No results	No results	25630.2	25314.9	26686	25956.1	24359.4	26838.9	40406	35923.3	30946.9	35267	30264	30940.4	0.759692	-0.396513	0.0015008	1	0.354656
Com_247_pos	Traumatic Acid	C12 H20 O4	228.136	10.551	Full match	No results	No results	20610.8	20674.8	16560	19033.3	17925.1	23312.1	11339.9	10583.8	10752.6	11975.1	9942.97	12346	1.7645	0.819258	6.563e-06	1	0.742349
Com_2480_pos	Gracillin	C45 H72 O17	884.473	14.226	Full match	No results	No results	153513	118622	131989	100468	94160	88348.7	71976.8	76474.9	81921.5	151718	93211.5	65753.5	1.26993	0.344743	0.115852	0.833333	0.344353
Com_2481_pos	Gracilioether E	C17 H24 O5	308.161	13.69	Full match	Invalid mass	No results	3.89684e+06	5.81735e+06	4.49313e+06	3.28219e+06	3.45872e+06	1.95759e+06	1.78294e+06	3.32812e+06	3.0553e+06	4.15883e+06	2.31578e+06	5.89822e+06	1.11523	0.157335	0.577819	0.611111	0.198062
Com_2483_pos	Gossypol	C30 H30 O8	518.193	8.338	Full match	No results	No results	21541.7	21739.3	20629.5	15288.4	15517.4	22134.5	32563.1	29078.7	23451.3	26528.3	16364.2	10593.8	0.843204	-0.246046	0.552328	0.722222	0.158703
Com_2484_pos	Gonane	C17 H28	232.219	13.843	Full match	No results	No results	165255	177380	163419	212346	160298	166633	56179.1	51376.6	44924.8	46610.8	88699.7	61789.7	2.99025	1.58026	2.5639e-05	1	1.47062
Com_2485_pos	Gonan-3-ol	C17 H28 O	248.213	14.258	Full match	No results	No results	93369.7	72987.3	89470	59650.7	53096.5	96414.5	104076	81028.7	72786.6	92895.5	126640	77677.4	0.83766	-0.255564	0.197957	0.666667	0.249143
Com_2487_pos	Golotimod	C16 H19 N3 O5	333.131	7.332	Full match	No results	No results	9476.74	8016.08	6247.39	7436.45	7786.39	7096.97	4178.34	4719.39	5687.22	4682.97	7997.07	10471.2	1.22058	0.287565	0.161751	0.722222	0.33266
Com_2488_pos	Gnoscopine	C22 H23 N O7	413.147	8.401	Full match	No results	No results	32429.4	37256.5	51480.8	42999.6	43782.4	42097	23535.7	49108.6	36982.1	24473.9	27524.8	30098.4	1.3042	0.383164	0.0580082	0.833333	0.381396
Com_2489_pos	Glyphosate	C3 H8 N O5 P	169.014	1.169	Full match	No results	No results	71695.7	69889.9	64036.8	69134	71791.4	77344.6	106706	74578.5	78947.5	100816	82461.9	117387	0.75574	-0.404038	0.0145079	0.972222	0.351808
Com_2490_pos	Gly-l-pro	C7 H12 N2 O3	172.085	1.315	Full match	Invalid mass	No results	458268	562626	469486	695028	439669	569406	391405	439690	468856	381888	531037	508348	1.17391	0.231327	0.118315	0.75	0.209355
Com_2493_pos	Gly-Leu	C8 H16 N2 O3	188.116	1.94	Full match	No results	No results	186695	245366	220617	174963	262737	201095	52056.4	105339	63457.2	54136.5	114411	76409.6	2.77254	1.47121	0.00019701	1	1.39003
Com_2494_pos	GLYCYRRHIZOL A	C26 H28 O5	420.192	10.033	Full match	No results	No results	140739	99811.8	89343.6	87796.6	87198.2	109868	99705.6	157667	112401	124192	84548.1	86115.8	0.92496	-0.112537	0.588057	0.527778	0.0913432
Com_2495_pos	Glycyrrhizin	C42 H62 O16	822.406	14.079	Full match	No results	No results	268426	260142	261103	369381	331226	315786	151066	101881	295568	157135	91728.7	216093	1.78206	0.833542	0.0138208	0.916667	0.871125
Com_2496_pos	Glycyl-L-leucine	C8 H16 N2 O3	188.116	5.828	Full match	Full match	No results	451710	520497	413669	505891	446781	341449	117606	104820	189496	117623	110746	145405	3.41098	1.77019	1.46031e-06	1	1.6316
Com_2497_pos	Glycylglycylglycyl-N~6~-{[3-carboxy-4-(6-hydroxy-3-oxo-3H-xanthen-9-yl)phenyl]carbamothioyl}-L-lysinamide	C33 H35 N7 O9 S	705.225	8.828	Full match	No results	No results	36673.6	47874.8	50816.1	38740.5	28687.4	46485	45771.9	15958.3	23788.2	45582.3	26392.6	30220.7	1.32796	0.409216	0.116271	0.805556	0.449791
Com_2498_pos	glycyclamide	C14 H20 N2 O3 S	296.119	7.691	Full match	No results	No results	89630.8	95981.7	82495.4	105508	83108.9	85944	31395.4	25782.9	19137.1	30780	40130.7	22774	3.19217	1.67454	3.37388e-05	1	1.55829
Com_249_pos	trans-Piceatannol	C14 H12 O4	244.073	6.977	Full match	No results	No results	5935.02	4791.11	4326.45	4926.97	5379.48	5741.86	5346.72	4891.55	4832.03	6270.87	5201.13	4709.11	0.995184	-0.00696504	0.928	0.527778	0.0174447
Com_24_pos	Z-Gly-Pro	C15 H18 N2 O5	306.121	8.691	Full match	No results	No results	29820.3	21792.4	24264.6	21509	23991.8	22956.2	37400.8	15627.4	27629.8	23952.7	14317.2	26771.6	0.99063	-0.0135811	0.81434	0.527778	0.137814
Com_2500_pos	Glycol oleate	C20 H38 O3	326.281	15.272	Full match	No results	No results	148060	248093	159015	132065	188071	99107.1	85382	48848.2	62250.7	225805	73216.4	94382.9	1.65187	0.724097	0.0442594	0.861111	0.795793
Com_2501_pos	Glycerophosphoglycerol	C6 H15 O8 P	246.051	1.376	Full match	No results	No results	62870.3	58383.5	66020.7	41694.3	49028.9	48315	64734.7	74268	43127.3	68275.6	49530.6	54158.1	0.921542	-0.117879	0.507524	0.666667	0.104245
Com_2504_pos	glutethimide	C13 H15 N O2	217.11	6.877	Full match	No results	No results	37069	38464.8	45528	49968.6	65253.9	40102.3	29284.7	50850.9	38440.3	44423	48936.2	56899.9	1.02809	0.0399657	0.820917	0.5	0.0467103
Com_2506_pos	Glutaric anhydride	C5 H6 O3	114.032	1.318	Full match	Invalid mass	No results	1.81288e+07	1.86876e+07	1.53791e+07	1.39791e+07	1.40549e+07	1.64399e+07	2.29032e+07	1.63414e+07	1.71365e+07	2.20535e+07	1.49947e+07	1.48143e+07	0.893072	-0.163152	0.292494	0.638889	0.14141
Com_2509_pos	Glutaric acid	C5 H8 O4	132.042	1.336	Full match	Invalid mass	No results	1.09817e+06	1.3622e+06	1.5892e+06	2.13956e+06	1.75563e+06	1.92252e+06	1.96403e+06	1.584e+06	1.73436e+06	2.04708e+06	1.899e+06	1.86903e+06	0.889144	-0.169511	0.238843	0.638889	0.180911
Com_2513_pos	glutaral	C5 H8 O2	100.052	1.322	Full match	Invalid mass	No results	2.30555e+06	3.08754e+06	4.15712e+06	3.59079e+06	3.33865e+06	3.35425e+06	2.94088e+06	5.02659e+06	3.55751e+06	2.03855e+06	1.81535e+06	1.99083e+06	1.14187	0.191395	0.336639	0.694444	0.254673
Com_2519_pos	Glucozaluzanin C	C21 H28 O8	408.179	6.3	Full match	No results	No results	16446.4	14622.3	14821.7	4647.69	10469.4	7301.78	4958.9	11626.5	13726.5	17058.4	34750.8	7830.08	0.759404	-0.397061	0.613305	0.583333	0.264975
Com_2520_pos	glucosulfone	C24 H36 N2 O18 S3	736.114	9.197	Full match	No results	No results	85639.4	78844.3	94655.6	84975.6	78887.2	53078.9	176124	110587	93227.9	62100.6	46601	95256.8	0.815351	-0.294506	0.543586	0.666667	0.204745
Com_2521_pos	Glucose 1-phosphate	C6 H13 O9 P	260.029	1.315	Full match	Full match	No results	6.1245e+06	8.46073e+06	9.99695e+06	9.9584e+06	9.40482e+06	1.09984e+07	1.29178e+07	9.18633e+06	1.45244e+06	1.48213e+07	1.05038e+07	1.04982e+07	0.925293	-0.112018	0.778511	0.666667	0.157249
Com_2523_pos	Glucogallin	C13 H16 O10	332.073	12.265	Full match	Invalid mass	No results	72937.3	80890.9	105014	93973.1	79253.1	77462	294918	298848	337852	192496	126706	294553	0.329713	-1.60072	0.000499664	1	1.40333
Com_2524_pos	Gloriosine	C21 H23 N O6	385.151	9.542	Full match	No results	No results	99353.5	174178	224175	138872	140653	99163.9	757828	874794	1.33937e+06	650732	635891	968406	0.167666	-2.57634	1.29862e-06	1	2.35843
Com_2526_pos	Glipizide	C21 H27 N5 O4 S	467.155	8.601	No results	Invalid mass	No results	7.96192e+06	3.81081e+06	3.3828e+06	2.04323e+06	5.0115e+06	3.05192e+06	2.2638e+06	7.11965e+06	3.41869e+06	2.17944e+06	6.57479e+06	5.79408e+06	0.923648	-0.114586	0.841829	0.555556	0.194045
Com_2527_pos	glabruquinone A	C18 H24 O4	304.167	10.46	Full match	No results	No results	5008.81	6923.08	7240.44	7553.47	9052.54	12415.7	20499.6	4758.12	4625.21	5887.93	5118.63	5382.6	1.04154	0.0587138	0.519651	0.75	0.24751
Com_252_pos	trans-N-p-coumaroyl tyramine	C17 H17 N O3	283.12	8.236	Full match	No results	No results	135727	56491.4	42471	37899	62660.9	57063.1	33851.6	63642	47865.1	40286	84839.2	53340.7	1.2115	0.276789	0.54571	0.583333	0.251551
Com_2530_pos	Glabridin	C20 H20 O4	324.136	9.599	Full match	No results	No results	10974.6	7007.16	9477.39	9814.12	10247.9	9307.26	11369.1	13880.1	9988.17	13643.6	13378.1	14567.2	0.7397	-0.434987	0.00577278	0.944444	0.400221
Com_2532_pos	gitogenin	C27 H44 O4	432.323	11.893	Full match	No results	No results	872703	1.0624e+06	661301	433167	430603	310755	626652	391859	478574	343582	731035	394789	1.27117	0.346162	0.436388	0.638889	0.248469
Com_2534_pos	ginsenoside Rg3	C42 H72 O13	784.494	15.236	Full match	No results	No results	29577.6	27200.8	24192.8	31749.7	29344.9	36270.7	8554.4	7453.35	16110.5	11120.2	6954.33	7238.55	3.10521	1.63469	0.000105601	1	1.54656
Com_2535_pos	Ginsenoside Rg2	C42 H72 O13	806.477	14.687	No results	Invalid mass	No results	72042.3	68249.6	42032.6	68127.6	83020.2	130011	28377.5	51485.7	72502.3	52556.5	28987	47321.9	1.64805	0.720762	0.0401152	0.805556	0.656672
Com_2536_pos	Ginsenoside B2	C48 H82 O18	946.554	1.131	Full match	No results	No results	63497.6	59349.6	65866.2	67742	33109.9	61452.9	118068	71678.9	110025	110479	81203.4	50704.5	0.647445	-0.62717	0.0371661	0.861111	0.551374
Com_2537_pos	Ginkgoic acid	C22 H34 O3	346.249	14.17	Full match	No results	No results	8931.09	17928.3	17472.6	11975.4	15845.5	13953.2	11872.6	22918.8	14017.8	24760.5	9897.98	13279.8	0.890007	-0.168111	0.65303	0.472222	0.156086
Com_2539_pos	gibberellin A24	C20 H26 O5	346.177	12.833	Full match	No results	No results	52451.8	35527.3	35592.2	30286.1	42400.7	32440.5	54553.4	68714.3	47216.2	29795.8	26373.1	32308.5	0.883138	-0.179289	0.656632	0.5	0.109241
Com_2540_pos	g-Glutamylcysteine	C8 H14 N2 O5 S	250.062	1.536	Full match	No results	No results	17670	18415.4	18340	12008.5	13015.6	19489.2	336500	143070	291071	355356	213438	173428	0.0653984	-3.9346	3.93279e-07	1	3.53322
Com_2543_pos	geroquinol	C16 H22 O2	246.161	12.319	Full match	No results	No results	1.35316e+06	1.5702e+06	1.86926e+06	2.32803e+06	1.90736e+06	1.9902e+06	1.2416e+06	1.84073e+06	1.57224e+06	995475	1.21387e+06	1.83671e+06	1.26637	0.340697	0.0851232	0.833333	0.324741
Com_2545_pos	Geranyllinalool	C20 H34 O	290.26	14.372	Full match	No results	No results	58320.6	60800.8	46357.6	60141.2	42251.5	68932.9	48085	49368.1	26760.5	65963.9	63991.3	54929.7	1.08964	0.123845	0.488508	0.555556	0.171548
Com_2547_pos	Geranylacetone	C13 H22 O	194.168	14.38	Full match	No results	No results	3037.46	2719.62	7518.89	4229.63	3566.81	4001.9	4771.95	3385.09	4111.67	3479.89	3516.52	4391.04	1.05995	0.083995	0.959661	0.555556	0.09847
Com_2548_pos	geranyl quinone	C16 H20 O2	244.146	11.531	Full match	Invalid mass	No results	78445.1	58589.7	74430.3	59079.5	58066	70478.1	107010	53218.5	62203.8	54738.7	51534.2	48834.8	1.05708	0.0800798	0.523688	0.75	0.125837
Com_2550_pos	Gentamicin C1a	C19 H39 N5 O7	449.285	13.036	Full match	No results	No results	202794	83568.7	117262	111025	161806	125984	108954	133962	124462	125997	96915.2	120843	1.1284	0.174275	0.54454	0.444444	0.113761
Com_2551_pos	geniposidic acid	C16 H22 O10	374.122	13.69	Full match	No results	No results	118055	98910.3	86295.2	73507.9	83341.7	54674.5	50052.6	101520	73658.3	84007.1	89769	101642	1.02824	0.0401701	0.862836	0.527778	0.0544055
Com_2552_pos	Genipin	C11 H14 O5	226.084	12.926	Full match	Invalid mass	No results	44362.4	27921.6	37917.6	18585.1	24821.9	24406.5	23416.7	25996.3	25179.2	23392.5	23061.5	26238.2	1.20865	0.273396	0.307733	0.666667	0.198529
Com_2558_pos	Gemfibrozil	C15 H22 O3	250.156	8.518	Full match	No results	No results	93180.9	62337.4	42622	96931.2	65307.1	79357	81653.4	49948.1	68249.7	68187	27310.6	41577.3	1.30514	0.384204	0.190381	0.694444	0.391607
Com_255_pos	trans-Lachnophyllol	C10 H12 O	148.088	12.315	Full match	Invalid mass	No results	558525	592323	594890	661648	558648	589854	368780	504033	409099	309164	372765	397985	1.50557	0.590308	0.000743819	1	0.549726
Com_2560_pos	gemeprost	C23 H38 O5	394.27	14.006	Full match	Invalid mass	No results	135479	178023	230942	194485	202903	146749	155924	65007.7	92699.6	121951	62247.3	107151	1.79937	0.847488	0.0061542	0.944444	0.841044
Com_2561_pos	GCLH:7-Phenylacetamido-3-chloromethyl-3-Cephem-4-Carboxylic Acid Diphenyl Methyl Ester	C29 H25 Cl N2 O4 S	532.122	10.452	Full match	No results	No results	168182	307445	352658	252691	272056	221115	217357	222566	333468	166071	165420	189002	1.21661	0.282863	0.214517	0.75	0.285774
Com_2564_pos	Gastrin tetrapeptide	C37 H42 N6 O8 S	730.28	10.643	Full match	No results	No results	10994.6	10674.9	11459.8	10992.2	10461.3	11182.4	13290.8	13652.6	12688.2	13343.4	12629.2	13032	0.836322	-0.257869	1.91007e-06	1	0.234964
Com_2567_pos	Ganetespib	C20 H20 N4 O3	364.154	13.957	Full match	No results	No results	99050.1	92916.7	101950	73847.3	88497.2	84253.8	55510.5	100875	75380.2	75591	61645.4	127085	1.08956	0.123742	0.401766	0.638889	0.16436
Com_2569_pos	gamma-Mangostin	C23 H24 O6	396.156	9.179	Full match	No results	No results	128610	96767.4	131454	86559.5	96582.1	85322.1	109968	69117	68130.1	83257.7	51100.6	70454	1.38331	0.468127	0.028272	0.888889	0.45592
Com_2570_pos	Gamma-Linolenic acid	C18 H30 O2	278.224	14.711	Full match	Invalid mass	No results	479511	340024	273745	315700	285189	284397	140295	107981	118178	106537	193811	103451	2.56872	1.36105	2.94968e-05	1	1.25032
Com_2571_pos	gamma-glutamyltyramine	C13 H18 N2 O4	266.126	6.616	Full match	No results	No results	386251	397197	429542	491362	378882	342976	69121.1	78110.5	48358.1	47754.9	81032.7	62187.2	6.27633	2.64992	2.07133e-07	1	2.43374
Com_2574_pos	gamma-Glu-gln	C10 H17 N3 O6	275.111	1.322	Full match	No results	No results	561502	355765	218512	283262	497416	343605	418660	272984	359255	278278	133501	334916	1.25727	0.330296	0.302012	0.666667	0.330034
Com_2575_pos	gamma-Aminobutyric acid	C4 H9 N O2	103.063	1.189	Full match	Invalid mass	No results	6.92252e+07	5.9487e+07	5.49373e+07	5.09233e+07	5.68912e+07	5.8381e+07	1.56963e+07	1.35405e+07	1.18103e+07	1.9454e+07	3.60307e+07	1.41816e+07	3.15991	1.65988	0.000467325	1	1.60884
Com_2576_pos	Gallopamil	C28 H40 N2 O5	484.295	12.075	Full match	No results	No results	437936	503799	538828	635599	580570	445857	481412	501034	526169	224360	220179	371579	1.35181	0.434888	0.0856912	0.805556	0.474335
Com_2581_pos	Gallic acid	C7 H6 O5	170.021	0.551	Full match	Invalid mass	No results	14264.2	2245.75	12213.3	10186.6	13883.2	9159.76	16628.2	6852.67	26829	15662.9	15817.1	8486.01	0.686261	-0.543171	0.256975	0.722222	0.558049
Com_2582_pos	galegine	C6 H13 N3	127.111	1.129	Full match	No results	No results	141935	137739	126103	134661	142301	222675	143087	223646	195331	214515	719200	223153	0.526732	-0.92486	0.0795483	0.916667	0.70556
Com_2584_pos	gagunin H	C37 H58 O11	678.397	13.895	Full match	No results	No results	1.28342e+06	1.26113e+06	1.27982e+06	1.27693e+06	1.35654e+06	1.72379e+06	228581	472491	734495	637424	414638	388841	2.84433	1.50809	0.000821959	1	1.45429
Com_2586_pos	Gabexate	C16 H23 N3 O4	321.168	8.377	Full match	No results	No results	61489.8	46163.2	40095.5	61896.7	39790.1	50118.3	5505.75	4889.92	4964.27	5287.09	7234.12	4687.89	9.1975	3.20124	2.11233e-09	1	2.9089
Com_2587_pos	Gabapentin	C9 H17 N O2	171.126	13.675	Full match	No results	No results	267799	123107	188338	125321	159787	220868	154873	148083	155595	216501	243301	235670	0.94038	-0.0886849	0.626404	0.555556	0.113213
Com_2588_pos	G1	C21 H18 Br N O3	411.047	7.428	Full match	No results	No results	29637.1	68666.7	50437.8	56185.4	53627.5	56702.3	40517.4	96143.1	81328.4	31494.6	55321.1	40501.9	0.912977	-0.13135	0.853744	0.5	0.0661798
Com_258_pos	trans-geranic acid	C10 H16 O2	168.115	11.315	Full match	No results	No results	104502	211210	166569	142438	123484	169646	114645	65438.5	85916.7	89992.3	92502.7	81942.6	1.73036	0.791074	0.00211031	0.972222	0.707473
Com_2591_pos	fusarone	C14 H22 O3	238.156	12.517	Full match	Invalid mass	No results	24720.8	36674.4	36702.2	27187.4	23672.1	22696.2	22425	30425.7	31570.1	22153.7	26060.3	26651.3	1.07764	0.107875	0.566416	0.388889	0.0884303
Com_2592_pos	Fusarenone X	C17 H22 O8	354.131	11.349	Full match	No results	No results	56878.9	82006.8	136694	69581.5	56817.4	46082.8	15662.2	15140.2	16943	13224.4	14686.3	21848.9	4.59527	2.20015	6.15825e-05	1	1.93951
Com_2593_pos	Furmecyclox	C14 H21 N O3	251.152	9.587	Full match	No results	No results	162327	246178	201160	299943	325118	182727	22111.2	57640.6	32510.5	49030.1	62618.1	101165	4.36037	2.12445	0.000284657	1	2.04075
Com_259_pos	trans-Cinnamaldehyde	C9 H8 O	132.057	7.472	Partial match	Full match	No results	676736	618678	1.01443e+06	975833	770093	673178	1.82091e+06	877502	1.29289e+06	2.61378e+06	833734	992681	0.560868	-0.834268	0.0416642	0.861111	0.679267
Com_25_pos	zeta-carotene	C40 H60	540.468	13.491	Full match	No results	No results	13592.7	17056.6	27636.7	21527	28610.7	12572.7	34199	25410.1	45363.7	20664.3	11729	21386.3	0.762171	-0.391814	0.34661	0.611111	0.371074
Com_2604_pos	Furfuranol	C5 H6 O2	98.0366	11.516	Full match	No results	No results	276415	251500	251378	251547	255066	293283	390890	371436	378654	363373	307267	356347	0.728419	-0.45716	3.80695e-05	1	0.415106
Com_260_pos	trans-caffeic acid	C9 H8 O4	180.042	13.416	Full match	Invalid mass	No results	4.09512e+06	3.53961e+06	3.97211e+06	4.22447e+06	3.58547e+06	4.5101e+06	3.13542e+06	1.83343e+06	4.13278e+06	4.51129e+06	4.91585e+06	3.34596e+06	1.09381	0.129367	0.411558	0.555556	0.17577
Com_2611_pos	Furfural	C5 H4 O2	96.021	11.523	Full match	No results	No results	373401	344321	396198	362428	365369	410623	498677	399116	450613	406114	345113	368812	0.912454	-0.132176	0.196863	0.722222	0.119232
Com_2617_pos	Fumonisin B2	C34 H59 N O14	705.392	11.283	Full match	No results	No results	4546.58	4370.15	4458.45	5191.14	3856.06	5939.62	1409.84	6291.19	1141.65	2401.51	1458.66	979.913	2.07283	1.0516	0.0179318	0.833333	1.25247
Com_2619_pos	Fumonisin B1	C34 H59 N O15	721.387	11.701	Full match	No results	No results	91066.2	26612.5	81635	81221	67707.6	86843.4	35755.9	137652	59930	31553	53002.2	60119	1.15098	0.202868	0.513951	0.694444	0.271007
Com_2621_pos	fumiquinazoline C	C24 H21 N5 O4	443.157	8.77	Full match	Invalid mass	No results	6.85371e+06	4.70061e+06	4.81031e+06	5.29737e+06	6.4049e+06	5.97959e+06	4.90572e+06	5.61639e+06	5.31346e+06	4.85204e+06	6.60111e+06	6.09489e+06	1.01986	0.0283661	0.847377	0.472222	0.0653183
Com_2622_pos	Fumarylacetoacetic acid	C8 H8 O6	200.032	1.699	Full match	No results	No results	288377	288788	242166	322949	329110	331056	203579	198514	359176	281896	283281	334069	1.08547	0.118325	0.397213	0.611111	0.132863
Com_2623_pos	fructosylglycine	C8 H15 N O7	237.084	1.583	Full match	No results	No results	80656.8	117217	78428.9	101112	102874	143670	59503.3	119100	98339.9	77990.6	82295.7	91318	1.18052	0.239417	0.241625	0.694444	0.220988
Com_2625_pos	Fructoselysine	C12 H24 N2 O7	308.159	11.225	Full match	No results	No results	884477	407099	1.21288e+06	827916	930990	564626	36976.4	41219.8	30145.9	38357.2	42712.6	43922.6	20.6913	4.37095	1.57888e-06	1	3.91528
Com_2626_pos	fosmidomycin	C4 H10 N O5 P	183.03	1.195	Full match	Invalid mass	No results	3.93487e+06	3.98943e+06	3.22912e+06	3.04318e+06	3.47226e+06	4.0803e+06	2.65386e+06	2.30411e+06	2.07109e+06	1.92408e+06	1.33969e+06	2.30129e+06	1.72693	0.788208	0.00103529	1	0.742781
Com_2627_pos	fosfocreatinine	C4 H8 N3 O4 P	193.025	1.125	Full match	No results	No results	242603	226884	164587	221226	200937	189309	208557	144706	178529	125211	268273	149248	1.15916	0.213081	0.214121	0.722222	0.24701
Com_2632_pos	Fortimicin FU-10	C12 H24 N2 O9	340.149	8.817	Full match	Invalid mass	No results	212207	148415	174422	127678	144903	191545	160355	103951	164460	281011	98240.7	103425	1.09625	0.132579	0.436545	0.666667	0.235596
Com_2634_pos	Forskolin	C22 H34 O7	410.229	11.907	Full match	No results	No results	8102.09	6047.66	7791.57	5317.53	5422.23	4913.68	7372.04	4906.76	5157.68	5159.48	7070.04	4748.43	1.09241	0.127518	0.478336	0.722222	0.113462
Com_2635_pos	Formyl-L-methionine	C6 H11 N O3 S	177.045	6.084	Full match	No results	No results	9492.82	10604.1	11042.1	11820	8788.54	10112.3	11260.3	10227.9	10459.2	11984.8	11781.5	11914.9	0.914699	-0.128631	0.111591	0.777778	0.120807
Com_2637_pos	Formylcyclohexane	C7 H12 O	112.089	10.031	Full match	No results	No results	1.88412e+06	1.56837e+06	1.45818e+06	1.57756e+06	1.63685e+06	2.09355e+06	2.15868e+06	2.27173e+06	1.76279e+06	1.69571e+06	1.22589e+06	1.61103e+06	0.952712	-0.0698873	0.741215	0.638889	0.0523113
Com_2638_pos	formyl-CoA	C22 H36 N7 O17 P3 S	795.107	1.136	Full match	No results	No results	156366	64369.2	163318	138843	195227	179942	203484	174487	187748	235974	196008	218522	0.738406	-0.437514	0.0848209	0.916667	0.46634
Com_2639_pos	Formoterol	C19 H24 N2 O4	344.173	8.157	Full match	No results	No results	106559	81246.9	47706	103453	106048	95153.8	12169.1	19669.8	13353.1	23041.8	24463.7	17797.5	4.8886	2.28942	3.57824e-06	1	2.08366
Com_2640_pos	Formimidoyl-fortimicin A	C18 H36 N6 O6	432.27	12.484	Full match	Invalid mass	No results	1.694e+06	2.25744e+06	1.47834e+06	2.83913e+06	2.33001e+06	2.92486e+06	648761	1.09591e+06	1.06921e+06	1.13377e+06	993159	1.10967e+06	2.23516	1.16038	0.000290534	1	1.03963
Com_2641_pos	folinic acid	C20 H23 N7 O7	473.165	6.072	Full match	No results	No results	49489.9	53949.3	54169	61280.9	47929.4	58432.1	40871.5	42522.1	43993.7	47716.1	37033	42892.2	1.27535	0.350892	0.000846011	1	0.3204
Com_2643_pos	FMNH2	C17 H23 N4 O9 P	458.121	9.451	Full match	No results	No results	79198.5	81966.7	94386.3	94737.6	81257	61807.9	79971.1	87713.3	104684	106846	38785.2	71558.4	1.00775	0.011143	0.777139	0.527778	0.167481
Com_2645_pos	flutriafol	C16 H13 F2 N3 O	301.103	6.186	Full match	No results	No results	28613.8	27944.1	22567.8	23620.1	24972	24558.8	43760.6	18315.7	28971.4	39702.8	40111.8	22452.8	0.787712	-0.344261	0.248914	0.666667	0.253727
Com_2647_pos	Fluticasone propionate	C25 H31 F3 O5 S	500.183	9.132	Full match	No results	No results	725413	628401	640312	576109	526267	536348	1.56689e+06	818182	752781	875360	471816	495851	0.729358	-0.4553	0.249101	0.666667	0.323094
Com_2649_pos	Flusulfamide	C13 H7 Cl2 F3 N2 O4 S	413.946	1.026	Full match	No results	No results	1.05044e+06	692055	1.05988e+06	805888	782101	1.10247e+06	941231	694543	762622	1.02641e+06	389609	1.14608e+06	1.10732	0.147066	0.449366	0.611111	0.243317
Com_2650_pos	flurprimidol [ANSI]	C15 H15 F3 N2 O2	312.11	9.164	Full match	No results	No results	83719.3	60098.5	74893.2	67565.2	63779.5	75633.8	82256.9	80737.5	85846.6	77084.8	91404.2	88235.8	0.842006	-0.248097	0.0151819	0.916667	0.233692
Com_2653_pos	Fluridone	C19 H14 F3 N O	329.102	8.377	Full match	No results	No results	278780	193112	238883	310795	293842	317781	430555	277647	333843	492580	164078	216055	0.85295	-0.229467	0.594806	0.583333	0.176367
Com_2654_pos	FLURBIPROFEN AXETIL	C19 H19 F O4	330.128	7.669	Full match	No results	No results	70996.5	91706.4	119512	106729	82522.7	109147	99533.3	75042.1	93198.2	77513.7	53572.9	79860.2	1.21284	0.278395	0.131282	0.75	0.2817
Com_2657_pos	Flurazepam	C21 H23 Cl F N3 O	387.152	9.537	Full match	Invalid mass	No results	90026.3	114896	153525	109656	125461	103046	814869	779312	1.92677e+06	676519	848673	1.05015e+06	0.114268	-3.12951	3.7833e-06	1	2.78153
Com_2659_pos	fluphenazine enanthate	C29 H38 F3 N3 O2 S	549.265	11.315	Full match	No results	No results	10671.3	5417.99	5687.98	18442.8	5582.64	18682.1	8452.82	9388.21	3712.56	2358.71	2420.3	3139.58	2.18799	1.1296	0.0450638	0.833333	1.05021
Com_2660_pos	fluphenazine depot	C32 H44 F3 N3 O2 S	591.311	11.821	Full match	No results	No results	59496	17882.9	19606.3	19165.2	20797	8235.64	8367.2	17153.7	16207.5	5701.2	11814.8	11718.5	2.0459	1.03273	0.0835721	0.861111	0.795644
Com_2661_pos	Fluorescein	C20 H12 O5	332.067	6.413	Full match	No results	No results	17407.4	22381.5	30275.3	27188.5	24678.5	26278	37597.1	33210.7	29118.9	27488.6	22844.4	28288.9	0.830077	-0.268682	0.102556	0.805556	0.25507
Com_2662_pos	Fluocortolone caproate	C28 H39 F O5	474.28	10.952	Full match	No results	No results	97783.5	75267	79958.5	97427.4	85228	126148	29837.9	22782.6	28925.8	34475.6	23969.2	29892	3.30705	1.72555	3.73869e-07	1	1.56688
Com_2663_pos	FLUOCINONIDE	C26 H32 F2 O7	494.212	9.187	Full match	No results	No results	23175.9	13325.8	20304.8	18873.2	15751.5	14487.4	18926	10125.3	15488.9	20384.9	10427.1	16694.8	1.1507	0.20251	0.322074	0.611111	0.23504
Com_2665_pos	Fluocinolone Acetonide	C24 H30 F2 O6	452.201	10.085	Full match	No results	No results	82686.4	77068.8	81525.4	55185.3	77838.8	73391.6	57796.3	52353.1	56272.9	79891.7	62516.3	68199.8	1.18743	0.24784	0.075472	0.777778	0.231397
Com_2667_pos	Fluocinolone	C21 H26 F2 O6	412.168	11.958	Full match	No results	No results	143164	170270	168583	150368	125427	191444	368658	274280	294566	375471	314430	267811	0.50087	-0.997493	1.02617e-05	1	0.909078
Com_2670_pos	Flunisolide 21-acetate	C26 H33 F O7	476.223	11.628	Full match	Invalid mass	No results	71571.5	73156.1	68278.2	58218.4	59936.7	57876.5	14442.6	13373.2	11369.5	21877.9	26928.4	17017.2	3.70481	1.8894	6.17359e-05	1	1.77311
Com_2672_pos	FLUMEZAPINE	C17 H19 F N4 S	330.13	9.942	Full match	No results	No results	19685.2	22841.6	22435.2	21391.3	20568.6	19877.6	22384.9	111159	119726	92018.6	50000	87566.6	0.262604	-1.92904	0.00562556	0.944444	1.58034
Com_2676_pos	flumetasone	C22 H28 F2 O5	410.191	8.873	Full match	Full match	No results	882975	301461	444425	380151	416886	685944	1.04612e+06	270382	1.03372e+06	2.24102e+06	2.31069e+06	499719	0.420425	-1.25008	0.116141	0.777778	0.897357
Com_267_pos	trans-4-Hydroxy-L-proline	C5 H9 N O3	131.058	1.309	Not the top hit	Full match	No results	787104	820551	950958	870905	823741	811680	1.12795e+06	1.22742e+06	995961	1.14625e+06	1.17148e+06	1.29764e+06	0.72702	-0.459932	5.76322e-05	1	0.417383
Com_2680_pos	fludroxycortide	C24 H33 F O6	436.228	8.362	Full match	No results	No results	93439.2	106675	107915	101272	68538.2	97667	127569	101142	98108.1	115993	111062	119098	0.85517	-0.225717	0.0745358	0.833333	0.214586
Com_2681_pos	Fludarabine	C10 H12 F N5 O4	285.087	1.231	Full match	No results	No results	581096	449540	746271	545507	633304	466632	603103	810638	535591	443776	456720	394134	1.05499	0.0772308	0.618309	0.638889	0.0916105
Com_2682_pos	Flucloronide	C24 H29 Cl2 F O5	486.136	12.253	Full match	No results	No results	87140.3	120481	126917	111895	125136	153452	688935	674504	717610	477921	336039	632881	0.205511	-2.28271	2.90131e-06	1	2.05466
Com_2683_pos	flordipine	C26 H33 F3 N2 O5	510.233	11.766	Full match	No results	No results	22397.6	21958.9	28278.1	24683.9	22405.6	24384.1	10110.3	129916	202817	63812.3	31748.9	91885.9	0.271754	-1.87963	0.0890724	0.833333	1.22312
Com_2685_pos	Flindersiachromone	C17 H14 O2	250.099	9.128	Full match	No results	No results	38326.2	33736.6	36750.9	27721.9	30417.6	22037.8	63399.5	4692.44	34482.6	38166.4	24056.7	27026.2	0.985232	-0.0214643	0.599709	0.527778	0.342246
Com_2686_pos	Fleroxacin	C17 H18 F3 N3 O3	369.128	8.371	Full match	No results	No results	135904	97482.3	118907	237175	246547	258706	201667	201823	149199	262850	71274.8	114675	1.09309	0.128416	0.707347	0.555556	0.164442
Com_2688_pos	flavoxate	C24 H25 N O4	391.177	8.713	Full match	No results	No results	63614.5	49927.8	51145.7	57581.5	57502.8	61691.3	11705	5489.07	16145.2	8301.92	13782	11728	5.085	2.34625	7.5437e-05	1	2.20842
Com_268_pos	trans-4-Carboxymethylenebut-2-en-4-olide	C6 H4 O4	140.011	12.68	Full match	Invalid mass	No results	684925	858204	715459	1.67259e+06	740021	1.31539e+06	172437	337211	211556	180764	378207	248606	3.91593	1.96935	5.75172e-05	1	1.77681
Com_2691_pos	Flavin mononucleotide	C17 H21 N4 O9 P	456.103	9.542	Full match	No results	No results	176328	213222	277620	257213	268166	259272	279865	222200	305426	208837	187407	148422	1.07371	0.1026	0.515776	0.555556	0.134966
Com_2694_pos	flavanone 7-O-[alpha-L-rhamnosyl-(1->2)-beta-D-glucoside]	C27 H32 O12	548.189	9.592	Full match	Invalid mass	No results	617957	673508	704341	777523	718245	692907	630569	506993	642560	541491	447160	839302	1.15975	0.213819	0.1293	0.777778	0.230676
Com_2695_pos	fischeroside A	C28 H40 O11	552.259	14.041	Full match	No results	No results	800036	509237	519558	606488	828007	901381	175443	237799	97666.7	170786	547154	117962	3.09227	1.62867	0.0024022	0.944444	1.69342
Com_2696_pos	Firocoxib	C17 H20 O5 S	336.102	1.276	Full match	Not the top hit	No results	452395	266641	304678	204134	282094	260169	303889	281989	273427	321376	305705	205281	1.04637	0.0653931	0.843966	0.583333	0.0353785
Com_2697_pos	filibuvir	C29 H37 N5 O3	503.287	12.571	Full match	No results	No results	33928.6	106897	179510	40904.7	80859.2	34743.5	55472.6	386650	139279	138237	39739	232934	0.480538	-1.05728	0.175245	0.75	0.900254
Com_2698_pos	Filaminast	C15 H20 N2 O4	292.142	7.011	Full match	Invalid mass	No results	235275	205081	205815	206439	234285	272425	118893	107582	91066.8	87741.4	50398.2	90922.6	2.48684	1.31432	0.000264295	1	1.23923
Com_269_pos	trans-3-Indoleacrylic acid	C11 H9 N O2	187.063	6.3	Partial match	Full match	No results	5.90396e+07	5.08642e+07	4.28744e+07	5.29753e+07	4.33034e+07	4.34596e+07	5.2665e+07	6.29601e+07	7.40955e+07	7.05006e+07	1.11346e+08	7.66598e+07	0.652608	-0.615712	0.00831152	0.944444	0.546784
Com_2700_pos	Ferulic acid	C10 H10 O4	194.058	7.442	Full match	Full match	No results	395504	304859	420957	332234	427762	329681	714499	371236	501285	1.6787e+06	445922	389822	0.539075	-0.891441	0.103363	0.833333	0.622556
Com_2701_pos	feprazone	C20 H20 N2 O2	320.151	9.744	Full match	No results	No results	13010.4	8152.42	10613.6	9762.49	8716.77	7886.05	11561.1	13668.6	14112	11448.7	11318.1	13986.4	0.764068	-0.388226	0.0135872	0.916667	0.367322
Com_2703_pos	fentin	C18 H16 O Sn	368.021	1.315	Full match	No results	No results	913174	1.09175e+06	1.15018e+06	970412	884884	802033	1.80041e+06	1.54296e+06	1.50624e+06	1.63552e+06	1.41017e+06	902440	0.660673	-0.597992	0.00783482	0.888889	0.52587
Com_2704_pos	Fenpropimorph	C20 H33 N O	303.253	14.892	No results	Invalid mass	No results	2.41253e+08	1.49718e+08	1.77458e+08	1.60582e+08	1.76219e+08	1.55958e+08	2.95001e+08	2.55784e+08	2.22519e+08	1.83795e+08	4.18635e+08	2.06983e+08	0.670485	-0.576722	0.0276816	0.916667	0.508988
Com_2705_pos	fenpropathrin [ANSI]	C22 H23 N O3	349.167	7.828	Full match	No results	No results	57716.9	53624	49522.8	60220.2	43994.7	56388.7	12399.5	10937.2	8247.01	8111.53	20616.4	11928	4.45	2.15381	3.88673e-05	1	2.02476
Com_2707_pos	FENPICLONIL	C11 H6 Cl2 N2	235.99	1.625	Full match	No results	No results	287142	368382	293645	304036	278258	345164	135027	252899	222958	175125	149523	248749	1.58461	0.664129	0.00517123	1	0.637647
Com_2708_pos	Fenestrel	C16 H20 O2	244.145	13.895	Full match	No results	No results	12303.6	14957.8	10242.5	16513.5	13353.9	12845.1	23664.6	17098	21069.5	14018.5	12481.4	19472.3	0.744092	-0.426446	0.0448262	0.833333	0.371828
Com_2711_pos	fenamole	C7 H7 N5	161.07	6.073	Full match	Invalid mass	No results	29573.3	77158.5	62579.6	44172.8	40804.9	109196	97194.6	73866.4	108839	199133	135483	62156.3	0.537165	-0.896562	0.0330033	0.805556	0.841588
Com_2712_pos	FENAMIC ACID	C13 H11 N O2	213.078	5.834	Full match	No results	No results	19306.3	11926.5	16589.2	13545.4	11737.9	12510.5	22916.7	25966.7	16702.5	35831.5	27144.1	15150.1	0.595747	-0.747228	0.0120512	0.916667	0.650658
Com_2713_pos	Fedratinib	C27 H36 N6 O3 S	524.259	12.173	Full match	Invalid mass	No results	136118	147547	153317	183127	133036	138691	70618.5	94001.1	93277.7	151004	76201	70036.4	1.60651	0.683931	0.00609966	0.888889	0.66782
Com_2715_pos	Febrifugine	C16 H19 N3 O3	301.141	14.628	Full match	Invalid mass	No results	439534	324900	310180	296122	263550	314317	576953	406618	326197	549744	693429	404069	0.658977	-0.6017	0.0174516	0.916667	0.531201
Com_2716_pos	Favan-3-ol	C15 H14 O2	226.099	9.065	Full match	No results	No results	15959.4	12753.7	12665	11194.7	14418	12677.6	14086	15224.2	12508.8	15279.6	13117.3	10709.2	0.984471	-0.0225787	0.848816	0.527778	0.0208464
Com_2718_pos	Fasoracetam	C10 H16 N2 O2	196.121	11.035	Full match	No results	No results	3996.42	75199.5	106450	107814	3858.26	101347	4985.64	4670.27	58368.2	4379.47	4273.44	3870.2	4.94946	2.30727	0.0814921	0.694444	2.11407
Com_2719_pos	Fasiglifam	C29 H32 O7 S	524.186	7.895	Full match	No results	No results	47952.1	65481.8	56825	63444.7	43295	33157.8	56456.3	51823.7	57128.1	49985.6	37527.7	63296.9	0.98083	-0.0279252	0.802091	0.5	0.0843096
Com_2720_pos	farnesyl triphosphate	C15 H29 O10 P3	462.1	10.546	Full match	No results	No results	21157.6	27518.6	15963.9	21212.5	15939.5	21658.1	23243.8	73342.1	41956.9	21998	21031.6	27631.5	0.590096	-0.760979	0.0878402	0.833333	0.571235
Com_2722_pos	farnesoic acid	C15 H24 O2	236.177	9.985	Full match	Invalid mass	No results	347895	363230	381194	370180	429418	362294	295172	306455	380370	307276	209962	295028	1.25634	0.329231	0.0261449	0.888889	0.328369
Com_2723_pos	Fargesin	C21 H22 O6	370.141	7.756	Full match	Invalid mass	No results	80693.5	70471.6	78740.1	86546.1	69463.5	90676.8	101054	99780	81894.2	83618.7	62700.1	75994.9	0.943667	-0.0836501	0.574013	0.611111	0.069658
Com_2725_pos	Falcarinone	C17 H22 O	242.167	13.12	Full match	Invalid mass	No results	6.31187e+06	5.39624e+06	5.19382e+06	5.09693e+06	5.65827e+06	5.22723e+06	5.79462e+06	5.53854e+06	5.15342e+06	4.95826e+06	5.07333e+06	5.41689e+06	1.02973	0.0422599	0.504711	0.611111	0.0370475
Com_2729_pos	Falcarindiol	C17 H24 O2	260.177	12.312	Full match	No results	No results	62167.2	84937.8	91663.6	87295.2	71207.8	67846.7	48080.4	100015	55926.1	46851.2	67540.8	62746.5	1.22027	0.287201	0.126313	0.777778	0.296409
Com_272_pos	trans,trans-2,4-Heptadienal	C7 H10 O	110.073	14.893	Partial match	Full match	No results	2.47601e+06	2.54246e+06	2.55994e+06	2.39194e+06	2.20994e+06	2.63379e+06	2.67237e+06	2.85209e+06	2.82092e+06	2.63856e+06	3.3136e+06	2.16236e+06	0.900011	-0.151985	0.155567	0.833333	0.136827
Com_2730_pos	fagaramide	C14 H17 N O3	247.12	8.27	Full match	No results	No results	52378.3	60154	43028	57287.8	61987.9	46271.5	67936.2	77501.8	63353.7	61568.3	40409	59626.3	0.866931	-0.20601	0.249521	0.75	0.178412
Com_2733_pos	excavatoid A	C21 H34 O9	430.219	9.693	Full match	No results	No results	9793.86	9668.77	14540.7	10276.5	9460.68	12221.9	7640.7	8230.69	7467.32	11307.6	7099.06	7568.59	1.3376	0.419647	0.0141442	0.888889	0.389232
Com_2734_pos	exalamide	C13 H19 N O2	221.141	8.057	Full match	No results	No results	19627.5	20619.5	20911.8	27393.8	15824.1	20555.5	12667.6	7716.22	22467.7	25944.1	25676.8	14281.9	1.14876	0.200073	0.344932	0.583333	0.281108
Com_2737_pos	EUGENYL GLUCOSIDE	C16 H22 O7	326.136	8.193	Full match	No results	No results	8606.99	6187.63	8041.27	10345.9	7617.26	4124.87	32170.2	10016.5	19015.3	19856.4	11541.6	8204.74	0.445653	-1.16601	0.0165894	0.916667	0.970003
Com_2740_pos	Eugenol	C10 H12 O2	164.083	0.723	Full match	No results	No results	604450	315714	584614	594266	626192	744591	615981	616930	308203	694567	696681	561078	0.993241	-0.00978455	0.978854	0.527778	0.071387
Com_2742_pos	eudistomin Y7	C18 H9 Br3 N2 O2	521.822	1.079	Full match	No results	No results	80987.8	92629.6	83128.8	81392.1	66582.1	88693.9	60862.4	67693.8	75272.5	89581.3	47777.2	81779.3	1.16656	0.222256	0.143276	0.722222	0.237577
Com_2743_pos	Eucommin A	C27 H34 O12	550.203	7.884	Full match	No results	No results	24838.4	26164.9	21462.4	17362.8	30268.3	24358.1	16953	23468.9	10741.2	18855.2	9880.56	16448.3	1.49932	0.584305	0.0243304	0.916667	0.575993
Com_2747_pos	Eucalyptol	C10 H18 O	136.125	11.706	No match	Invalid mass	No results	1.8639e+06	2.92452e+06	3.00047e+06	4.40194e+06	3.39204e+06	4.45229e+06	2.06956e+06	3.74429e+06	3.12609e+06	1.15457e+06	1.03453e+06	1.85249e+06	1.54336	0.626073	0.0763891	0.777778	0.664354
Com_2749_pos	Etretinate	C23 H30 O3	354.219	11.219	Full match	No results	No results	60253.7	51993.2	55775.4	63785.1	65614.2	68898.8	54878.8	35013.2	43611.2	34055.7	22552	26334.3	1.69244	0.759103	0.00649399	0.972222	0.749712
Com_274_pos	tranexamic acid	C8 H15 N O2	157.11	1.238	Full match	Not the top hit	No results	1.55325e+06	1.28152e+06	433736	840437	975471	533518	421090	511226	424194	731824	414212	294583	2.00846	1.00609	0.0259354	0.916667	0.840724
Com_2750_pos	Etonogestrel	C22 H28 O2	324.208	11.231	Full match	No results	No results	70744.9	76854.3	71951	97268.1	88412.7	96886.2	43566.4	45300	67225.6	34112.1	17008.9	29416.9	2.12195	1.08539	0.0060427	1	1.10024
Com_2753_pos	Etoglucid	C12 H22 O6	262.141	8.611	Full match	No results	No results	92529	84290.5	79457.9	72173	77845.1	82345.3	72958.9	62335.9	60371.5	89014.8	77411.1	67906.2	1.13638	0.184443	0.0852854	0.805556	0.175819
Com_2754_pos	etnangien	C49 H76 O11	840.541	7.054	Full match	No results	No results	37774.1	35189.3	40406.4	28924.1	34582	30026.2	34024.4	24591.8	22802.2	39589.4	51729.3	35632.2	0.992959	-0.0101936	0.861224	0.527778	0.0514716
Com_2755_pos	Etizolam	C17 H15 Cl N4 S	342.071	8.721	Full match	Invalid mass	No results	13025.3	11407.7	14019.8	10062.8	12214.5	8314.43	17694.2	16799.6	15311.1	22521.7	19827.9	16020.2	0.63827	-0.647761	0.00106328	1	0.597377
Com_2756_pos	Etiproston	C24 H32 O7	432.214	11.21	Full match	No results	No results	19656.5	38991.1	55353.2	49263.2	17716.2	28975	91669.5	126654	550127	192235	36165.8	99146.3	0.191565	-2.38409	0.0111806	0.916667	1.84464
Com_2758_pos	ethylestrenol	C20 H32 O	288.245	13.175	Full match	Invalid mass	No results	1.00713e+08	1.0764e+08	1.40776e+08	7.35834e+07	1.06128e+08	1.1037e+08	6.88613e+07	7.9053e+07	1.5735e+08	1.13212e+08	6.35894e+07	7.23339e+07	1.15298	0.205363	0.310645	0.666667	0.279227
Com_2769_pos	Ethylbenzene	C8 H10	106.078	12.534	Full match	Invalid mass	No results	8.0238e+06	8.06437e+06	7.79283e+06	9.90373e+06	1.27246e+07	6.38308e+06	6.92332e+06	9.52159e+06	8.77461e+06	4.86815e+06	6.85247e+06	1.02098e+07	1.12179	0.165805	0.43545	0.583333	0.158201
Com_2775_pos	Ethyl oleate	C20 H38 O2	310.286	14.355	Full match	No results	No results	33847.8	31715.4	52983	44564.3	31353.5	45323.5	36861.2	31437.2	31803.2	32921.9	37085.3	39517.8	1.14388	0.193934	0.271349	0.611111	0.155631
Com_2779_pos	Ethyl methoxycinnamate	C12 H14 O3	206.094	6.885	Full match	No results	No results	78149	100782	50153.2	71091.9	66640.5	63873.8	87214.8	44584.3	75188.3	70290.5	55575.6	55463.1	1.10912	0.149417	0.459514	0.611111	0.143345
Com_2781_pos	Ethyl maltol	C7 H8 O3	140.047	12.258	Full match	No results	No results	361645	540845	592775	477717	587692	468161	1.6742e+06	1.84491e+06	2.07374e+06	1.30568e+06	991731	1.60708e+06	0.318914	-1.64876	1.33791e-05	1	1.48505
Com_2785_pos	Ethyl L-tyrosinate	C11 H15 N O3	209.105	5.64	Full match	Invalid mass	No results	1.41142e+06	4.67819e+06	1.47185e+07	9.30069e+06	7.4462e+06	5.00659e+06	6.98069e+07	6.1544e+07	7.25319e+07	1.19575e+08	7.02387e+07	8.25055e+07	0.0893771	-3.48395	0.000295185	1	3.43377
Com_2787_pos	Ethyl docosahexaenoate	C24 H36 O2	356.27	12.305	Full match	Invalid mass	No results	505120	626803	635887	830763	657519	511384	373150	1.29121e+06	682746	328236	398362	682318	1.00305	0.00439298	0.645576	0.555556	0.143082
Com_278_pos	trachelanthamidine	C8 H15 N O	141.115	8.73	Full match	Invalid mass	No results	78135.3	76685.9	82000.9	74882.2	66345.3	85784.4	139844	112301	106736	111177	115240	81106.7	0.696024	-0.522791	0.00277592	0.944444	0.464511
Com_2790_pos	Ethyl cinnamate	C11 H12 O2	176.083	11.541	Full match	No results	No results	51347.5	42510.5	50274.6	47361.5	54069	53305.2	63855.3	45081.5	62069.2	50511.3	48917.6	52158.2	0.926456	-0.110205	0.313725	0.611111	0.0998507
Com_2796_pos	Ethyl Butylacetylaminopropionate	C11 H21 N O3	215.152	6.856	Full match	No results	No results	123387	93814.7	74315.5	79294.6	71321.8	33911.1	36307.7	41215.6	39614.8	33319.9	13697.8	22936.7	2.54444	1.34735	0.003745	0.916667	1.23253
Com_279_pos	Trabectedin	C39 H43 N3 O11 S	761.262	13.959	Full match	No results	No results	58124.6	65216.7	72413.2	60100.7	49646.7	44055.8	55142	55386.1	62642.6	67047.8	62240.6	84763.6	0.902731	-0.147633	0.311117	0.638889	0.141879
Com_280_pos	Tos-Arg-CH2Cl	C13 H21 Cl N4 O2 S	332.107	8.826	Full match	No results	No results	3226.14	3067.73	2067.76	2871.3	2864.77	9673.32	3001.24	1366.41	2118.64	1675.06	2353.77	2053.37	1.89132	0.919392	0.0663691	0.861111	0.689164
Com_2816_pos	Ethyl acetate	C4 H8 O2	88.0524	13.16	Full match	No results	No results	97839.6	76388.7	66215.2	67754.3	64587.9	66656.6	83071.7	95804.3	67533.2	76561.9	96113.1	89431.4	0.864167	-0.210618	0.113341	0.777778	0.209561
Com_2818_pos	Ethyl 8-chloro-4-[(4-ethoxyphenyl)amino]-3-quinolinecarboxylate	C20 H19 Cl N2 O3	370.107	11.707	Full match	No results	No results	69169.2	88005.9	99657.3	152381	106217	145503	56201.3	82939.8	61606.7	23572.6	42567.6	52365.1	2.07025	1.0498	0.00609463	0.972222	0.996677
Com_2819_pos	Ethyl 5-cyano-3a-methoxy-3,3a,7,7a-tetrahydropyrano[3,2-b]pyrrole-1(2H)-carboxylate	C12 H16 N2 O4	252.11	6.221	Full match	Invalid mass	No results	572513	665750	608818	826352	578856	541630	129399	98181.5	123825	92037.1	212188	142164	4.75551	2.2496	4.97769e-06	1	2.0874
Com_281_pos	Torvoside H	C45 H74 O18	902.483	14.501	Full match	No results	No results	698145	794532	444243	683255	812594	1.14258e+06	93624.6	432298	370029	280104	194148	81439.4	3.15185	1.6562	0.00461003	1	1.70088
Com_2821_pos	Ethyl 4,4,4-trifluoro-2-(4-hydroxy-3,5-diisopropylbenzyl)-3-oxobutanoate	C19 H25 F3 O4	374.169	0.563	Full match	No results	No results	4875.21	3798.47	5005.7	5732.21	6323.77	4619.12	7511.59	3902.69	6233.3	6224.51	6559.17	3623.86	0.891334	-0.165962	0.533593	0.638889	0.121593
Com_2822_pos	Ethyl 3-oxohexanoate	C8 H14 O3	158.094	8.634	Full match	No results	No results	9359.24	6434.08	8668.23	11093.6	5878.24	8055.7	14252.8	9034.57	7345.01	10581.9	8667.41	8079.03	0.853838	-0.227966	0.278694	0.638889	0.205896
Com_2824_pos	Ethyl 3-[3-(cyclopentyloxy)-4-methoxyphenyl]-5-oxoprolinate	C19 H25 N O5	347.172	7.956	Full match	No results	No results	74996.6	1988.26	13338.7	58394	52157.7	10445.1	82555.1	34021.8	44277.6	57403.7	37726	53984.3	0.681748	-0.552689	0.176132	0.638889	1.19408
Com_2826_pos	Ethyl 2-(4-biphenylyl)-2-[(trifluoromethyl)sulfanyl]-4-pentenoate	C20 H19 F3 O2 S	380.107	7.285	Full match	No results	No results	39321.8	42531	42113.4	39758.4	48148.8	45137.7	98791.6	45359.6	52810.1	45267.8	22360.3	29366.6	0.874319	-0.193769	0.913321	0.611111	0.146074
Com_2828_pos	Ethyl 2-(2-naphthyl)-2-[(trifluoromethyl)sulfanyl]-4-pentenoate	C18 H17 F3 O2 S	354.092	5.548	Full match	Invalid mass	No results	112040	73702	104632	112246	109267	90386	99458.9	73212.2	101359	83507.1	78328.6	66152.1	1.1997	0.262679	0.0885281	0.833333	0.242728
Com_282_pos	tortuosene A	C23 H32 O7	420.213	10.719	Full match	No results	No results	18948.5	10081.5	16391.2	6488.03	11475.1	8949.9	7541.12	6066.11	5886.63	7084.9	6409.76	7283.24	1.79616	0.844912	0.0212963	0.916667	0.694841
Com_2830_pos	Ethyl 1H-imidazol-2-ylacetate	C7 H10 N2 O2	154.074	8.765	Full match	No results	No results	69941.4	50378.4	51381.8	45965.2	56017	40813.7	25642.5	33963.7	43333.3	28077.8	26710.9	42849.2	1.56796	0.64889	0.00408233	0.944444	0.605107
Com_2831_pos	Ethyl 1-(benzoylamino)-3-(2-furyl)-5-oxoprolinate	C18 H18 N2 O5	342.121	9.154	Full match	No results	No results	47820.5	38399.9	115074	200156	51219.7	74692.9	763452	38491.6	200629	79247.6	13962.2	34585	0.466542	-1.09992	0.933145	0.527778	0.439803
Com_2833_pos	Ethyl 1-(4-ethoxyphenyl)-4-hydroxy-1H-pyrazole-3-carboxylate	C14 H16 N2 O4	276.11	6.382	Full match	No results	No results	259861	294324	221664	286697	237238	208599	32121.3	26414.4	30741.6	26264.7	69762.2	26851.2	7.10981	2.82981	1.1469e-05	1	2.65988
Com_2836_pos	Ethyl 1-(2-(1H-indol-3-yl)ethyl)-5-oxo-5,10a-dihydro-1H-chromeno[2,3-b]pyridine-3-carboxylate	C25 H22 N2 O4	414.159	10.878	Full match	No results	No results	733827	884582	897536	468016	1.08008e+06	3.09268e+06	754741	1.46335e+06	780386	5.02283e+06	487284	1.12091e+06	0.743208	-0.428163	0.712969	0.583333	0.275312
Com_283_pos	Torcetrapib	C26 H25 F9 N2 O4	600.166	7.974	Full match	No results	No results	4991.38	9605.5	8602.3	14527.8	11680.5	4995.76	5431.93	5911.27	5099.93	6166.83	11981.5	16528.2	1.06423	0.0898121	0.735726	0.472222	0.136968
Com_2841_pos	Ethyl (6-{[dimethyl(2-methyl-2-propanyl)silyl]oxy}-1-phenyl-1,2,3,4-tetrahydro-1-naphthalenyl)acetate	C26 H36 O3 Si	424.243	11.219	Full match	No results	No results	11136.7	7758.62	10442.9	8408.57	11946	10292.1	4551.18	5907.45	6278.63	3716.81	4717.59	5480.74	1.95694	0.968598	7.98417e-05	1	0.887989
Com_2843_pos	Ethyl (4,5-diphenyl-2-thienyl)(oxo)acetate	C20 H16 O3 S	336.081	1.336	Full match	Invalid mass	No results	768661	684632	1.10991e+06	820625	877256	525543	851510	1.91108e+06	1.55789e+06	706513	550134	773606	0.753713	-0.407914	0.382854	0.611111	0.284114
Com_2847_pos	Ethyl (2E)-8-hydroxy-2-nonenoate	C11 H20 O3	200.141	11.56	Full match	Invalid mass	No results	70780.4	67605.2	88337.5	133508	56025.4	84383.8	24552.5	29396.5	23102.9	28153.2	39175.9	20861.5	3.02973	1.59919	4.52282e-05	1	1.43437
Com_2849_pos	Ethyl (2E)-[(4-chlorobenzoyl)hydrazono]acetate	C11 H11 Cl N2 O3	254.045	1.377	Full match	No results	No results	255068	234422	239872	288012	248994	222721	287020	124452	183461	115181	105958	94753.7	1.63488	0.709183	0.019752	0.861111	0.751447
Com_2850_pos	Ethyl (2,3,4-trimethoxy-6-octanoylphenyl)acetate	C21 H32 O6	380.219	14.082	Full match	No results	No results	102314	67092.3	155750	97514	131394	112045	52070.6	29203.9	73692.9	44485.4	80655	31072.6	2.14059	1.09801	0.00420988	0.944444	1.05433
Com_2852_pos	Ethosuximide	C7 H11 N O2	141.079	1.342	Full match	Invalid mass	No results	7.32969e+06	2.45095e+06	1.99808e+06	1.52953e+06	4.11228e+06	3.27776e+06	2.06868e+06	2.99107e+06	4.06992e+06	1.89158e+06	1.20426e+06	3.5745e+06	1.31002	0.389586	0.485182	0.611111	0.292182
Com_2853_pos	Ethinylestradiol sulfonate	C23 H30 O4 S	402.186	8.912	Full match	No results	No results	3710.04	4637.38	3717.31	3531.53	4505.8	4005.09	5362	3727.26	3026.98	4567.69	3362.96	3422.1	1.02719	0.0387052	0.686964	0.611111	0.0643784
Com_2854_pos	Ethinylestradiol	C20 H24 O2	296.177	12.94	Full match	Invalid mass	No results	797194	667784	677078	623292	756491	705878	900372	869366	668351	686402	798275	901223	0.876394	-0.190348	0.0858197	0.805556	0.169994
Com_2857_pos	Eterobarb	C16 H20 N2 O5	320.136	8.943	Full match	No results	No results	424490	282855	336231	299072	397677	524816	269625	135359	160900	544078	129109	123690	1.66217	0.733068	0.0413026	0.833333	0.866535
Com_2859_pos	etamiphylline	C13 H21 N5 O2	279.168	14.651	Full match	Invalid mass	No results	139173	141950	188188	133881	173908	178509	128609	44594.3	140239	206531	150662	125203	1.20076	0.263947	0.275841	0.694444	0.365161
Com_285_pos	Tonantzitlolone	C26 H40 O7	464.276	11.21	Full match	No results	No results	254745	257071	482839	368172	295205	377638	195057	158707	183596	113673	47976.6	87868.5	2.58702	1.37129	0.00364642	1	1.37173
Com_2862_pos	Etalocib	C33 H33 F O6	544.226	5.753	Full match	No results	No results	3581.24	3099.38	5890.54	7703.96	6916.74	4175.14	4280.62	3960.35	6072.08	8284.13	6381.05	12338.3	0.759187	-0.397473	0.293525	0.694444	0.338767
Com_2864_pos	etacelasil	C11 H25 Cl O6 Si	316.112	6.708	Full match	No results	No results	151111	166758	138638	127560	158065	190013	168434	129022	140030	133070	170203	161373	1.03327	0.0472135	0.694415	0.5	0.0449095
Com_2866_pos	Estriol	C18 H24 O3	288.172	13.154	Full match	Invalid mass	No results	176748	142472	121421	153408	144572	131648	168444	147312	160017	117529	162650	135768	0.975945	-0.0351282	0.760948	0.583333	0.0586092
Com_2867_pos	Estrane	C18 H30	246.234	14.897	Full match	Invalid mass	No results	1.61878e+07	1.9287e+07	1.46097e+07	1.64469e+07	1.74755e+07	1.79905e+07	2.00367e+07	1.58276e+07	1.6164e+07	1.63348e+07	2.16413e+07	1.48178e+07	0.973051	-0.0394128	0.772784	0.527778	0.0553276
Com_2868_pos	Estradiol valerate	C23 H32 O3	356.234	11.512	Full match	No results	No results	7278.7	7871.22	12408.9	7028.71	8140.52	7852.18	6981.92	7371.48	5546.94	4792.73	3837.37	5432.61	1.48927	0.574606	0.0114478	0.944444	0.540477
Com_2870_pos	Estradiol undecylate	C29 H44 O3	440.328	15.49	Full match	No results	No results	34745.9	33151.8	25750.3	51107.5	40491.5	41699.4	11777.4	9660.2	11390.5	11674	16187	10593.5	3.18376	1.67073	3.9945e-06	1	1.51066
Com_2874_pos	Estradiol cypionate	C26 H36 O3	396.265	14.288	Full match	No results	No results	22149.1	24597.9	26830	34847.6	28317.4	25863.7	28126.6	36236.9	39856.1	26314.4	21118.8	25198.2	0.91945	-0.121157	0.557489	0.583333	0.101696
Com_2876_pos	Estra-1,3,5(10)-trien-3-ol	C18 H24 O	256.182	13.152	Full match	No results	No results	855791	959904	1.01967e+06	994474	860912	875988	789326	861889	946310	813828	715588	719942	1.14852	0.199775	0.0284158	0.861111	0.188754
Com_2880_pos	esprocarb	C15 H23 N O S	265.15	7.616	Full match	No results	No results	150524	166564	173968	197381	151866	155955	50676.6	61111.2	45574.5	41273.7	72534.8	61791.8	2.9921	1.58116	6.40354e-06	1	1.45913
Com_2881_pos	Esonarimod	C14 H16 O4 S	280.077	8.716	Full match	No results	No results	6261.42	4316.2	4863.37	4449.25	5678.3	4663.65	5489.36	4794.53	5486.38	7754.32	5056.01	4476.35	0.914549	-0.128868	0.426688	0.638889	0.111113
Com_2882_pos	Esmolol	C16 H25 N O4	295.177	6.364	Full match	No results	No results	6794.46	5548.96	5833.43	6349.19	5954.11	6180.45	7203.48	7302.42	7395.95	8023.55	9479.89	7626.19	0.779491	-0.359396	0.000959476	1	0.328716
Com_2889_pos	Erythorbic acid	C6 H8 O6	176.032	1.329	Full match	Invalid mass	No results	574525	546549	602694	601011	570992	626970	4.27824e+07	3.35343e+07	3.4601e+07	3.16626e+07	3.01162e+07	3.62785e+07	0.0168572	-5.89049	7.19698e-11	1	5.36013
Com_288_pos	Tolycaine	C15 H22 N2 O3	278.162	8.787	Partial match	Full match	No results	2.72733e+06	3.02407e+06	3.17738e+06	3.59825e+06	2.70913e+06	2.73369e+06	1.49442e+06	1.12242e+06	927706	1.18074e+06	2.06853e+06	1.45862e+06	2.17752	1.12268	0.000407411	1	1.06028
Com_2890_pos	Erlotinib	C22 H23 N3 O4	393.168	10.657	Full match	No results	No results	39647.9	42648.8	42575.2	38207.3	38561.7	65022.2	22179.4	21550.9	19919.1	22190.8	21149.9	21587.9	2.07394	1.05237	0.000253323	1	0.935521
Com_2892_pos	Erisimin	C29 H42 O9	534.282	11.013	Full match	No results	No results	8552.78	8343.36	7854.62	7476.55	11606	9661.69	8729.69	7665.22	9068.83	8229.44	7428.23	7349.64	1.10365	0.14228	0.259528	0.694444	0.122967
Com_2894_pos	eriojaposide A	C24 H38 O11	502.241	12.719	Full match	No results	No results	44479.2	35523.2	34721.5	38605.2	38434	31125.6	42955.7	26396.2	40137.4	41177.5	23831.8	17111	1.16324	0.218154	0.25891	0.583333	0.272838
Com_2896_pos	Eriodictyol	C15 H12 O6	288.063	8.599	Full match	Full match	Full match	8.01105e+06	7.05997e+06	1.47301e+07	1.4907e+07	1.23638e+07	1.22095e+07	1.61054e+07	1.63385e+07	1.36628e+07	6.86734e+06	8.81926e+06	1.27408e+07	0.929525	-0.105434	0.740877	0.611111	0.0955257
Com_2905_pos	Eriocitrin	C27 H32 O15	596.173	9.153	Full match	No results	No results	317212	205758	299770	474089	243884	393604	127651	104115	66182.3	50262.2	126289	108893	3.31563	1.72928	0.000140697	1	1.59873
Com_2906_pos	Ergocristine	C35 H39 N5 O5	609.293	11.91	Full match	No results	No results	263609	288363	85338.2	67585.7	336957	273239	2.22095e+06	2.56284e+06	3.39676e+06	1.69093e+06	822626	2.09996e+06	0.102789	-3.28224	8.44215e-05	1	3.09947
Com_2907_pos	Ergocornine	C31 H39 N5 O5	561.297	10.022	Full match	No results	No results	139549	252213	302059	311403	178659	222141	1.44927e+06	687394	402916	1.40782e+06	1.31213e+06	839823	0.23052	-2.11703	0.000352257	1	1.85528
Com_2908_pos	epsilon-Rhodomycin T	C30 H35 N O11	585.22	8.236	Full match	No results	No results	32395.5	21342.3	12898.7	14404.2	14955.1	19090.4	24770.7	38910.8	19984.3	14157.8	13537.8	9461.1	0.952523	-0.0701738	0.974489	0.472222	0.0662784
Com_2909_pos	Eprosartan	C23 H24 N2 O4 S	424.147	1.336	Full match	Full match	No results	269919	164496	247404	312740	255819	322309	103569	180549	74515.3	145270	346900	152980	1.56676	0.647782	0.0531231	0.805556	0.744466
Com_2911_pos	Eplerenone	C24 H30 O6	414.203	12.327	Full match	No results	No results	70309.4	57586.5	71993.5	65517.9	60759.2	94602	60327.3	75447.1	71240.8	102831	63462.7	64739.6	0.960552	-0.0580638	0.736406	0.555556	0.0532391
Com_2912_pos	epigallocatechin-(4beta->8)-4'-O-methylgallocatechin	C31 H28 O14	624.148	8.905	Full match	No results	No results	20917.1	27184.6	22377.3	25620.5	22052.7	23350.1	10999.6	11194.9	6718.06	10991.3	17346.8	10878.9	2.07696	1.05447	0.000994355	1	1.00667
Com_2913_pos	epi-fiscalin C	C27 H29 N5 O4	487.22	7.276	Full match	Invalid mass	No results	159559	101761	90057.7	79349.7	116623	98830.2	77598.4	127716	100955	152898	114253	87012	0.978421	-0.0314734	0.88309	0.5	0.0485526
Com_2914_pos	epicatechin	C15 H14 O6	290.078	7	Full match	No results	No results	21188.5	18424.5	17636.2	17313.8	21750.3	23518	24368.3	18421.4	22996.2	24243.1	19416.9	18639.8	0.935554	-0.0961077	0.398347	0.694444	0.0897655
Com_2916_pos	Epelsiban	C30 H38 N4 O4	518.287	15.338	Full match	No results	No results	3013.02	3861.37	5104.46	3237.92	2934.6	2931.22	5540.85	13016.7	6577.27	3968.84	4331.92	4929.06	0.549532	-0.863724	0.029141	0.916667	0.698839
Com_2919_pos	enniatin B4	C34 H59 N3 O9	653.424	10.332	Full match	No results	No results	26901.8	43091.6	25682.6	47585.9	36620.3	27007.7	7006.3	10549.4	6666.84	6565.16	6297.09	10990.5	4.30346	2.1055	2.20129e-06	1	1.91497
Com_2920_pos	emodin-3-O-sulphate	C15 H10 O8 S	350.011	1.32	Full match	No results	No results	190884	154860	186194	140811	122513	150142	254332	200660	232926	253729	209328	144877	0.729563	-0.454896	0.0193093	0.888889	0.407332
Com_2921_pos	emiglitate	C17 H25 N O7	355.164	14.416	Full match	No results	No results	21789	14794	10306.6	16376.6	9444.14	14931.4	20377.1	18629.8	9793.25	18756.6	20674.6	14441.7	0.8536	-0.228368	0.357558	0.638889	0.258469
Com_2923_pos	Embelin	C17 H26 O4	294.182	11.597	Full match	No results	No results	13781.7	13915.9	16504.4	18676.1	17057.4	18392.1	13197.2	12795.9	11368.1	11900.7	12609.1	17966.1	1.2316	0.300538	0.0329985	0.888889	0.279726
Com_2925_pos	Eldecalcitol	C30 H50 O5	490.365	14.505	Full match	No results	No results	647529	544209	454654	848759	606616	818012	80471.3	229085	245032	153155	127897	140606	4.01515	2.00545	7.27012e-05	1	1.8833
Com_2926_pos	elansolid B1	C37 H50 O7	606.358	11.733	Full match	No results	No results	53929.4	57638.5	51715.8	31484.2	40155.4	40724.9	21070.2	23763.9	15418.5	37946.9	51382	24646.8	1.58211	0.66185	0.0331802	0.888889	0.684368
Com_2929_pos	Elaeokanine C	C12 H21 N O2	211.157	10.851	Full match	No results	No results	80949	43241.8	57089	44551	64647.8	63001.5	142064	96369.4	85672	99907.7	93365.8	136261	0.540787	-0.886868	0.000801182	1	0.813985
Com_2930_pos	elaeodendroside T	C32 H44 O10	588.293	12.859	Full match	No results	No results	749678	696638	777067	425156	686119	416069	741386	692416	722349	542324	470356	552838	1.00781	0.0112205	0.944586	0.527778	0.083602
Com_2931_pos	Elacytarabine	C27 H45 N3 O6	507.332	14.419	Full match	No results	No results	136742	157786	120292	163680	141729	155579	47258.1	80099.9	61345.2	72928.2	85264.9	60591.4	2.14929	1.10386	7.31055e-05	1	1.02497
Com_2933_pos	Eicosapentanoic acid	C20 H30 O2	302.224	14.837	Full match	No results	No results	65822.8	107962	87432.6	106011	85887.5	71567.2	93254.7	128636	149001	98401.8	85216.3	98922.9	0.802964	-0.316594	0.100467	0.722222	0.286574
Com_2936_pos	Eicosapentaenoic acid	C20 H30 O2	302.224	12.544	Full match	Full match	Partial match	6.11582e+07	7.94625e+07	9.9147e+07	1.31357e+08	1.0611e+08	8.14522e+07	6.85128e+07	1.11341e+08	9.01093e+07	7.22056e+07	7.76555e+07	6.43338e+07	1.15393	0.206561	0.358702	0.666667	0.173315
Com_2938_pos	Eglumetad	C8 H11 N O4	185.069	10.402	Full match	No results	No results	579022	453404	386223	520991	442457	508385	102222	189715	137200	78083.4	129564	114824	3.84573	1.94326	1.60097e-05	1	1.80836
Com_2941_pos	Efloxate	C19 H16 O5	324.099	9.617	Full match	No results	No results	6485.38	5858.29	9153.15	8192.96	8934.2	8268.91	8924.6	6544.76	6805.23	7475.66	6198.5	8965.87	1.04405	0.062184	0.69002	0.555556	0.0840641
Com_2944_pos	Edoxudine	C11 H16 N2 O5	256.105	1.942	Full match	No results	No results	260679	294512	345352	178677	265783	307725	166393	393116	205081	294010	221672	451909	0.954131	-0.0677403	0.986354	0.527778	0.0353962
Com_2945_pos	Edivoxetine	C18 H26 F N O4	339.186	14.903	Full match	No results	No results	997684	746217	617714	620512	616611	731998	1.08369e+06	807091	816703	885822	1.36896e+06	725755	0.761378	-0.393315	0.0576192	0.833333	0.362093
Com_2946_pos	Ectoine	C6 H10 N2 O2	142.074	1.325	Full match	No results	No results	350245	1.0981e+06	1.08111e+06	1.44296e+06	986490	1.20297e+06	838880	1.23833e+06	965470	436005	1.29787e+06	2.11467e+06	0.894163	-0.161391	0.775893	0.527778	0.126696
Com_2949_pos	Ectocarpene	C11 H16	148.125	9.703	Full match	Invalid mass	No results	303539	301323	349188	351052	272772	205161	553149	125356	332275	464282	170109	280764	0.925801	-0.111225	0.894408	0.5	0.207605
Com_2956_pos	Echinacoside	C35 H46 O20	786.26	13.739	Full match	No results	No results	754844	271181	398585	331386	646017	318714	450543	222001	281527	267529	146503	199629	1.73545	0.795314	0.0406178	0.861111	0.718688
Com_2957_pos	Echimidine	C20 H31 N O7	397.209	9.775	Full match	No results	No results	205322	184921	95220.2	107040	137785	149471	75885.2	201949	61653.9	79437.4	96428.1	83412.7	1.46929	0.555117	0.0681493	0.833333	0.577849
Com_2958_pos	Ebselen	C13 H9 N O Se	274.985	1.329	Full match	No results	No results	1.01147e+06	1.00474e+06	1.03193e+06	801566	918999	756857	1.06208e+06	779110	807783	988750	956238	659565	1.05178	0.0728344	0.548526	0.583333	0.0754147
Com_295_pos	Toluene	C7 H8	92.0624	14.897	Full match	Invalid mass	No results	1.16254e+06	1.34481e+06	1.12558e+06	1.02374e+06	1.01938e+06	1.20288e+06	1.15975e+06	1.05792e+06	1.13573e+06	1.23009e+06	1.63749e+06	982377	0.954963	-0.0664839	0.671043	0.527778	0.0706545
Com_2961_pos	dysoline	C16 H19 N O5	305.125	8.709	Full match	No results	No results	119562	114474	171360	181323	118776	151515	117553	124942	94545.5	154780	220901	179684	0.960336	-0.0583885	0.907178	0.527778	0.0789376
Com_2962_pos	dysideolide A	C13 H22 O3	226.157	8.346	Full match	Invalid mass	No results	671646	509019	526483	467182	473535	1.41163e+06	811156	2.61755e+06	486614	569752	315226	293351	0.796972	-0.327399	0.988871	0.472222	0.0356656
Com_2963_pos	dyclonine	C18 H27 N O2	289.203	11.306	Full match	No results	No results	36440.1	43141.7	29026.3	36572	36593.8	56999.2	12826.4	13672.8	15463.9	24446.7	47206.7	30418	1.65775	0.729226	0.035865	0.833333	0.798411
Com_2964_pos	D-Xylonolactone	C5 H8 O5	148.037	0.073	Full match	Invalid mass	No results	11461.3	11855.2	14234.4	32948.6	125267	66184.3	15705.5	22917.8	16698.3	81739.7	38315	98067	0.957973	-0.0619429	0.698182	0.638889	0.274601
Com_2965_pos	dTDP-beta-L-vancosamine	C17 H29 N3 O13 P2	545.12	8.265	Full match	No results	No results	33835	32650.2	18824.9	40554.9	25194.7	25468.1	20184.4	67320.4	17233.1	22612.2	28594.2	35025.7	0.924375	-0.113449	0.988621	0.555556	0.165135
Com_2966_pos	Droxidopa	C9 H11 N O5	213.063	1.54	Full match	No results	No results	11455.1	10167.1	12698.5	11807	9871.67	10395	8526.54	8390.42	10763.2	6942.98	15155.6	12664.2	1.06328	0.0885203	0.48611	0.611111	0.136632
Com_2972_pos	Drospirenone	C24 H30 O3	366.218	12.857	Full match	Full match	No results	2.73797e+06	2.44438e+06	1.7779e+06	1.51314e+06	1.66699e+06	1.72041e+06	3.10378e+06	3.11172e+06	2.50957e+06	2.19003e+06	2.48921e+06	3.81856e+06	0.688665	-0.538127	0.0137949	0.888889	0.499912
Com_2973_pos	Dronedarone	C31 H44 N2 O5 S	556.303	12.867	No match	Invalid mass	No results	7.89586e+06	5.48319e+06	4.67604e+06	4.31845e+06	5.97837e+06	4.93462e+06	8.01383e+06	8.87789e+06	6.95969e+06	5.86726e+06	6.78547e+06	8.0884e+06	0.746459	-0.421864	0.0199979	0.888889	0.400978
Com_2974_pos	Drofenine	C20 H31 N O2	317.232	13.602	No results	Invalid mass	No results	1.95068e+06	1.36831e+06	2.05895e+06	1.31002e+06	801594	1.71081e+06	3.95163e+06	2.82483e+06	2.11114e+06	4.10645e+06	3.51976e+06	2.69895e+06	0.478867	-1.0623	0.00192468	1	0.993828
Com_2976_pos	D-ribosylnicotinate	C11 H13 N O6	255.074	1.725	Full match	No results	No results	9546.82	8504.21	6571.15	9843.53	11616.5	6741.48	9011.49	7704.4	7445.43	9647.74	4669.91	6702.91	1.16913	0.225441	0.274388	0.666667	0.223711
Com_2977_pos	Drazoxolon	C10 H8 Cl N3 O2	237.03	1.331	Full match	No results	No results	174166	103307	92726.8	161714	150528	173346	146935	157392	157572	128141	168730	151429	0.940221	-0.0889276	0.487067	0.527778	0.148453
Com_2979_pos	D-Raffinose	C18 H32 O16	526.15	1.316	No match	Invalid mass	No results	699683	923586	1.51717e+06	1.03465e+06	753814	700559	1.14418e+06	1.18352e+06	1.10872e+06	1.09562e+06	1.113e+06	865630	0.864652	-0.209808	0.213354	0.777778	0.240829
Com_2980_pos	D-Phenylalanyl-L-valyl-D-valyl-L-tyrosine	C28 H38 N4 O6	526.278	6.461	Full match	No results	No results	15427.6	14873.1	15197.7	15332.7	17146.3	16795.2	21105.7	24235.1	33190.2	18614.9	17831.7	12402.4	0.744015	-0.426596	0.120514	0.833333	0.3316
Com_2981_pos	D-Phenylalanyl-L-leucyl-L-histidyl-D-alpha-glutamyl-N-[(3S)-2-oxo-3-azepanyl]-D-alloisoleucinamide	C38 H57 N9 O8	767.432	14.52	Full match	No results	No results	15285.9	13654.7	15579.3	13873.3	12963.7	15184.2	16777.3	27702.4	37214.4	28288.8	23316.1	15146.3	0.582983	-0.778474	0.0152598	0.916667	0.650166
Com_2984_pos	D-PANTOTHENIC ACID	C9 H17 N O5	219.11	1.401	Full match	No results	No results	593731	353236	332493	368726	391794	633682	444594	301357	406577	649557	413688	279062	1.07168	0.0998723	0.667727	0.5	0.0980305
Com_2985_pos	Doxorubicin	C27 H29 N O11	543.171	8.497	Full match	No results	No results	6853.37	9364.37	8855.06	4226.8	9241.01	7408.38	19284.9	45699.4	15276.4	15608.5	7071.69	13261.5	0.395422	-1.33853	0.0222963	0.888889	1.05196
Com_2986_pos	Doxaprost	C21 H36 O4	352.26	14.715	Full match	No results	No results	468539	501861	377153	341350	496160	167968	212708	108796	160504	383683	98596	393709	1.73272	0.793041	0.061863	0.805556	0.868419
Com_2987_pos	D-Ornaline	C10 H18 N2 O6	262.116	7.976	Full match	Invalid mass	No results	1.22582e+06	1.9384e+06	2.15678e+06	1.7855e+06	1.83049e+06	1.9684e+06	1.9481e+06	2.25782e+06	1.44021e+06	1.91364e+06	628700	1.64647e+06	1.10884	0.149053	0.45763	0.583333	0.277643
Com_2988_pos	Doretinel	C24 H30 O2	350.223	14.445	Full match	No results	No results	33709.9	35668.4	34327.5	51043.3	42547.4	36076.1	46071.1	67075.3	59875.8	57663.6	55901.7	47890.3	0.697722	-0.519275	0.00206492	0.944444	0.479198
Com_2990_pos	DOG	C19 H36 O5	344.256	11.648	Full match	No results	No results	147903	196945	196092	176057	126478	166908	40687.6	47735	43843.4	23045.2	59844.9	54821.4	3.74247	1.90399	3.69797e-05	1	1.77435
Com_2991_pos	Dodecyl 2,4-di-O-acetyl-6-deoxy-alpha-L-mannopyranosyl-(1->3)-4-O-acetyl-6-deoxy-alpha-L-mannopyranosyl-(1->4)-6-deoxy-alpha-L-mannopyranoside	C36 H62 O16	750.405	13.945	Full match	No results	No results	203548	111699	104724	90549.2	106731	212352	137156	220444	262616	211970	140615	203304	0.705381	-0.503526	0.0688314	0.805556	0.500931
Com_2994_pos	Dodecanedioic acid	C12 H22 O4	230.151	9.399	Full match	No results	No results	115040	135833	78891.1	105184	84554.2	96793	211023	98490	119340	146515	115267	121840	0.75854	-0.398703	0.0847199	0.833333	0.344084
Com_2998_pos	Docosahexaenoic acid	C22 H32 O2	340.26	14.802	No match	Invalid mass	No results	1.89382e+06	2.63076e+06	2.64075e+06	1.79992e+06	4.19851e+06	1.19231e+06	1.35049e+06	561346	765564	2.46752e+06	654870	1.61729e+06	1.93554	0.952737	0.0355294	0.861111	0.987298
Com_2999_pos	Docetaxel	C43 H53 N O14	807.35	13.451	Full match	No results	No results	77195	208118	187922	180187	166392	141974	205660	95611	150385	131902	115795	277725	0.98435	-0.0227566	0.985501	0.555556	0.137565
Com_29_pos	Zeranol	C18 H26 O5	322.177	12.313	Full match	No results	No results	210372	242379	214633	311001	221332	241431	149537	205411	151700	135872	227320	210795	1.33361	0.415341	0.021455	0.888889	0.400374
Com_3000_pos	DMACA Reagent	C11 H13 N O	175.099	6.066	Full match	No results	No results	105484	86423.2	85855.3	94810.3	285784	98851.1	63113.6	88217.1	86614.2	66445.9	52831.8	96580.1	1.66858	0.738623	0.0815996	0.805556	0.563197
Com_3001_pos	D-lysopine	C9 H18 N2 O4	218.126	5.973	Full match	No results	No results	25640.4	21623.9	16183.6	20977.2	17227.5	15140.2	7082.94	7186.4	8669.53	12232.6	14679.3	16094.3	1.77106	0.824614	0.00721159	0.972222	0.800773
Com_3003_pos	DL-TYROSINE	C9 H11 N O3	181.074	8.874	Full match	No results	No results	263507	163633	199969	163149	245725	409302	210610	120187	125129	386591	98942.6	111976	1.37198	0.456254	0.161151	0.777778	0.528885
Com_3004_pos	DL-Tryptophan	C11 H12 N2 O2	204.09	6.3	Full match	Full match	Full match	5.86481e+07	5.05553e+07	4.26269e+07	5.26581e+07	4.30699e+07	4.32407e+07	5.23512e+07	6.25328e+07	7.36594e+07	7.01323e+07	1.10765e+08	7.61437e+07	0.652623	-0.615678	0.00837112	0.944444	0.546587
Com_3007_pos	DL-Stachydrine	C7 H13 N O2	143.094	1.325	Not the top hit	Full match	No results	1.41846e+06	1.04546e+06	711721	1.03242e+06	1.12867e+06	1.66652e+06	646412	1.10333e+06	1.21714e+06	581613	819598	859217	1.33974	0.421957	0.112982	0.75	0.389428
Com_3009_pos	DL-Phenylalanine	C9 H11 N O2	165.079	10.72	Full match	No results	No results	128273	146219	167119	161495	97969.7	124860	87238.8	50242.4	46915.6	92293.5	137474	78902.7	1.6751	0.744245	0.0166327	0.916667	0.747114
Com_3010_pos	DL-Lysine	C6 H14 N2 O2	146.105	1.064	Full match	Full match	No results	1.16525e+06	942042	946540	1.00877e+06	991324	951523	381703	421333	327184	663752	873638	621841	1.82567	0.868427	0.0072087	1	0.869257
Com_3013_pos	DL-Histidine	C6 H9 N3 O2	155.069	1.177	Full match	Invalid mass	No results	133505	181040	142015	161466	134429	125263	107494	102504	125700	104421	135308	125437	1.25234	0.324622	0.0134144	0.861111	0.292666
Com_3015_pos	DL-Glutamine	C5 H10 N2 O3	146.069	7.949	Full match	Invalid mass	No results	2659.4	3016.63	2242.52	3144.63	2817.51	4477.81	6250.02	2520.44	3235.33	2617.96	3730.63	3210.11	0.85133	-0.232209	0.434496	0.638889	0.179944
Com_3017_pos	DL-Glutamic acid	C5 H9 N O4	147.053	1.293	Full match	Invalid mass	No results	1.55843e+06	2.03768e+06	1.57272e+06	1.70359e+06	1.58738e+06	2.00956e+06	7.05667e+06	5.53728e+06	6.00656e+06	8.68986e+06	7.2548e+06	8.59178e+06	0.242701	-2.04275	1.03472e-07	1	1.85175
Com_3018_pos	DL-dimyristoylphosphatidylglycerol	C34 H67 O10 P	666.45	9.454	Full match	Invalid mass	No results	16369.5	18528.2	27940.5	18753.6	32842.1	17369.5	35756.1	52931.7	37757.5	32904.6	20213.3	54180.3	0.56388	-0.82654	0.0149843	0.944444	0.741481
Com_3021_pos	DL-Cerulenin	C12 H17 N O3	223.12	6.36	Full match	No results	No results	126685	110290	95060.5	92014.7	93124.2	125457	97311.3	82919.4	85543.2	102099	67867.8	83276.9	1.23817	0.308208	0.0303038	0.833333	0.282818
Com_3022_pos	DL-Carbidopa	C10 H14 N2 O4	226.095	5.465	Full match	Invalid mass	No results	142893	199203	202048	380021	197523	228642	259880	178357	408371	180816	377454	336366	0.775496	-0.366808	0.240977	0.638889	0.32813
Com_3023_pos	DL-Arginine	C6 H14 N4 O2	174.111	1.173	Full match	No results	No results	1.47199e+06	1.37572e+06	1.17665e+06	1.22553e+06	1.30187e+06	1.40748e+06	435672	380586	369014	749498	1.33451e+06	557327	2.07997	1.05657	0.00818364	0.916667	1.11288
Com_3024_pos	DL-2,6-Diaminopimelic acid	C7 H14 N2 O4	190.095	1.32	Full match	No results	No results	140366	183361	274662	225086	130482	144172	61182	54678.9	48427.4	61143.4	79471.6	43283.6	3.15385	1.65711	3.28511e-05	1	1.48479
Com_3025_pos	Dixanthogen	C6 H10 O2 S4	241.956	0.984	Full match	No results	No results	191238	163439	135187	180056	144230	184524	209470	225788	195484	199575	200617	199936	0.811357	-0.301592	0.0115216	1	0.28844
Com_3026_pos	Disperse blue 7	C18 H18 N2 O6	358.123	9.704	No match	Invalid mass	No results	146767	160418	193511	244267	172812	254989	2.22729e+06	2.04927e+06	2.59653e+06	1.6883e+06	1.09766e+06	1.86346e+06	0.10178	-3.29647	7.96043e-08	1	2.98625
Com_3027_pos	dispacamide A	C11 H11 Br2 N5 O2	402.929	1.032	Full match	No results	No results	565445	629928	649361	520377	493292	484455	652743	414668	681621	707133	644122	685106	0.883094	-0.179361	0.263865	0.805556	0.159481
Com_3028_pos	Disopyramide	C21 H29 N3 O	339.233	8.844	Full match	No results	No results	285118	288439	289486	376821	248912	280485	58301.9	42590.9	32823	38284.6	104681	57760.6	5.29018	2.40332	6.26415e-05	1	2.28151
Com_3029_pos	Dipropyl phthalate	C14 H18 O4	250.12	12.623	Full match	No results	No results	139812	92982.6	120023	120776	126695	114516	164977	140712	127387	126754	155934	104106	0.871851	-0.197847	0.159855	0.805556	0.180786
Com_302_pos	Tolgabide	C18 H18 Cl2 N2 O2	364.076	8.101	Full match	Invalid mass	No results	125522	172240	292718	254782	179648	314241	454328	310147	463246	360542	496484	656443	0.48853	-1.03348	0.00261165	0.972222	0.971161
Com_3033_pos	Diprogulic Acid	C12 H18 O7	274.105	12.323	Full match	Invalid mass	No results	1.04102e+07	1.23381e+07	1.11745e+07	1.10049e+07	1.18292e+07	1.20977e+07	7.2494e+06	9.79485e+06	8.49539e+06	6.17702e+06	7.05477e+06	1.08995e+07	1.38621	0.47115	0.00976876	0.972222	0.452816
Com_3034_pos	Diphosphoric acid, mono[[2-[(3Z)-4,8-dimethyl-3,7-nonadien-1-yl]-2-methyl-3-[(1Z,5Z)-2,6,10-trimethyl-1,5,9-undecatrien-1-yl]cyclopropyl]methyl] ester, ion(3-)	C30 H49 O7 P2	583.298	12.38	Full match	Invalid mass	No results	514314	395453	703732	167287	581495	354076	1.16667e+07	1.1551e+07	1.08401e+07	1.07666e+07	5.70151e+06	1.09347e+07	0.0441966	-4.49992	1.2293e-06	1	4.1855
Com_3035_pos	Diphosphoric acid, mono[(2E,6Z,10Z)-3,7,11,15-tetramethyl-2,6,10,14-hexadecatetraen-1-yl] ester, ion(3-)	C20 H33 O7 P2	447.173	10.916	Full match	No results	No results	71467.9	33515.3	48365.7	60279.2	67707.9	67635.7	119868	64240.1	76881.8	119192	37066.3	46189.4	0.753007	-0.409265	0.363049	0.638889	0.310659
Com_3036_pos	Diphosphoric acid, mono[(2E,10E)-3,7,11,15-tetramethyl-2,10,14-hexadecatrien-1-yl] ester, ion(3-)	C20 H35 O7 P2	449.189	7.383	Full match	No results	No results	1.54558e+06	346776	599529	264243	1.83255e+06	386236	891315	197378	303356	510744	90693.7	45690.5	2.43967	1.28668	0.0927638	0.777778	1.40452
Com_3039_pos	Diphenyl 3-methyl-3-[(triisopropylsilyl)oxy]-4-vinyl-1,1-cyclopentanedicarboxylate	C31 H42 O5 Si	522.28	11.261	Full match	No results	No results	73345.6	53909.9	58840.4	50073.4	136201	68242.5	48620	39304.8	38410.5	42088.9	25456.5	33425.7	1.93841	0.954874	0.00683038	1	0.821402
Com_3042_pos	Diphenyl 3-[(triisopropylsilyl)oxy]-4-vinyl-1,1-cyclopentanedicarboxylate	C30 H40 O5 Si	508.267	11.486	Full match	No results	No results	290506	147579	106661	135941	172796	270619	37847.8	72409.6	158897	62790	39375	44460.6	2.7036	1.43488	0.00349708	0.916667	1.40532
Com_3043_pos	Diphenyl [(2S,3R,4S)-2,4-dihydroxy-3-methylhexyl]phosphonate	C19 H25 O5 P	364.145	7.414	Full match	No results	No results	155733	115710	137618	113603	131958	109643	96798.3	70894.7	81105.8	147523	54715	55844.5	1.50778	0.592427	0.0272491	0.861111	0.62343
Com_3044_pos	Diosmin	C28 H32 O15	608.173	8.822	Full match	No results	No results	2294.14	1994.95	2051.85	2316.01	2071.49	2195.19	2764.43	3818.55	7527.76	2662.13	3225.23	8188.07	0.45851	-1.12498	0.0211954	1	0.883703
Com_304_pos	Tofimilast	C18 H21 N5 S	339.152	8.199	Full match	No results	No results	73784.8	59906.4	69487.5	69120.3	73219	84133.9	184496	127069	160127	160339	58398.4	89283.8	0.551038	-0.859775	0.0305518	0.833333	0.707094
Com_3052_pos	Diosmetin	C16 H12 O6	300.062	9.81	Full match	Full match	Full match	1.70193e+07	2.26685e+07	2.21032e+07	1.20429e+07	1.77502e+07	1.59995e+07	2.35923e+07	3.31115e+07	2.0329e+07	1.77222e+07	2.30829e+07	2.11428e+07	0.77409	-0.369428	0.0718589	0.805556	0.339576
Com_3053_pos	Diosgenin	C27 H42 O3	414.312	14.815	Full match	No results	No results	55872.6	70292.1	79954.8	78266.1	70281.2	72423.6	81647	59114.7	73564.6	41393.6	55305.7	95494.3	1.0506	0.0712157	0.571027	0.527778	0.116326
Com_3055_pos	dioncophylline C	C23 H25 N O3	363.182	6.923	Full match	No results	No results	39805.4	32075.8	33509.8	29056.7	26838.8	24512.2	14662.5	5385.71	4398.9	12031.3	10336.8	6186.53	3.50551	1.80963	0.000608166	1	1.75832
Com_3056_pos	Dinoseb	C10 H12 N2 O5	240.074	1.317	Full match	Invalid mass	No results	220258	147824	236635	241065	194117	195590	198277	183629	213439	166229	105792	187047	1.17173	0.228644	0.213333	0.75	0.243019
Com_3058_pos	Dinocton 6	C16 H22 N2 O7	354.143	11.714	Full match	No results	No results	125887	144137	127361	213989	191341	229034	49972.4	126153	99095.2	65946.1	67569.7	92756.1	2.05736	1.04079	0.00197087	0.972222	0.97029
Com_305_pos	Tofacitinib	C16 H20 N6 O	312.169	11.109	Full match	No results	No results	103694	71872.2	61272	67826.5	68401.7	55413	5845.49	9411.11	16944.8	12407	10756	13609.9	6.21215	2.63509	4.74417e-06	1	2.44262
Com_3062_pos	Di-n-Amyl phthalate	C18 H26 O4	306.182	9.455	Full match	No results	No results	14943	18485.8	20757	20333.6	20005.2	13281.7	17586.2	13835.7	16572.7	20105.4	14781.7	17241.9	1.07673	0.106662	0.487374	0.666667	0.113915
Com_3063_pos	Dimetotiazine	C19 H25 N3 O2 S2	391.14	6.481	Full match	No results	No results	28990.4	18649.7	26401.9	26120.2	34366	28422	38121.7	45826.4	70078.5	52479.4	42051.7	76328.8	0.50156	-0.995504	0.00099306	1	0.884512
Com_3064_pos	Dimetofrine	C11 H17 N O4	227.115	8.557	Full match	No results	No results	6329.55	7100.94	7535.75	4725.99	5279.77	7289.64	9469.79	5890.78	7323.03	11397.7	6686.28	4549.13	0.844316	-0.244144	0.398011	0.611111	0.194605
Com_3065_pos	Dimethylthioacetamide	C4 H9 N S	103.045	1.555	Full match	No results	No results	192858	211217	166009	342536	213647	198068	82106.2	42188.3	102982	59913.3	165306	40816.5	2.68458	1.42469	0.00296426	1	1.4314
Com_3066_pos	Dimethylsulfoniopropionate	C5 H10 O2 S	134.041	1.285	Full match	No results	No results	18270.8	16293.8	21093.3	13327.3	25227.8	18536.3	12362.8	13651.7	17597.4	15010.5	22806.1	15085.5	1.16822	0.224308	0.240594	0.722222	0.205714
Com_3067_pos	Dimethyl[2-methyl-4-(phenylsulfonyl)butoxy](2-methyl-2-propanyl)silane	C17 H30 O3 S Si	342.167	12.855	Full match	No results	No results	182894	149783	174878	194428	207744	168806	142196	176101	112598	132861	97466.9	119274	1.38186	0.466607	0.00826901	0.916667	0.442379
Com_3068_pos	Dimethyl(2-methyl-2-propanyl)[(2-phenyl-3,4,5,6,7,8-hexahydro-2H-benzo[7,8]cycloocta[1,2-b]pyran-4-yl)oxy]silane	C27 H36 O2 Si	420.248	5.478	Full match	No results	No results	25662.7	29988.3	29057	37345.3	28959.5	27482.2	5599.61	7150	4741.74	5262.18	8375.69	4849.11	4.96118	2.31068	4.49592e-07	1	2.12556
Com_3070_pos	Dimethyl(2-methyl-2-propanyl)[(2-phenyl-2,3,4,5,6,7-hexahydrobenzo[6,7]cyclohepta[1,2-b]pyran-4-yl)oxy]silane	C26 H34 O2 Si	406.232	13.466	Full match	No results	No results	579211	979374	1.798e+06	2.02209e+06	728977	1.54549e+06	217150	601330	536054	66891.9	168335	194895	4.2883	2.10041	0.00309293	0.972222	2.10899
Com_3071_pos	Dimethyl(2-methyl-2-propanyl)[(2-phenyl-2,3,4,5,6,7,8,9-octahydrocyclohepta[b]pyran-4-yl)oxy]silane	C22 H34 O2 Si	358.235	13.661	Full match	No results	No results	296831	247235	286863	189568	159740	343277	82583	63287.9	47167.9	46649.5	47239.3	42073.8	4.63072	2.21124	2.46583e-06	1	2.00883
Com_3072_pos	Dimethyl phthalate	C10 H10 O4	194.058	13.472	Full match	Full match	No results	271144	219316	242082	248372	230531	290396	299595	246459	301059	303771	304033	262398	0.874529	-0.193422	0.0378761	0.861111	0.178154
Com_3073_pos	Dimethyl octanediimidate	C10 H20 N2 O2	200.152	8.391	Full match	No results	No results	14249	10417.9	12285.9	8948.06	8995.59	13748.7	23333.8	12576.1	15679	17973.8	8082.66	6388.31	0.816877	-0.29181	0.585149	0.611111	0.193457
Com_3074_pos	dimethyl itaconate	C7 H10 O4	158.058	1.323	Full match	No results	No results	365746	338608	434706	288436	276943	264235	362478	259716	292401	417973	254108	254937	1.06899	0.0962533	0.558309	0.666667	0.126537
Com_3075_pos	Dimethyl 7-[3-(3,5-dimethylphenoxy)-1-propyn-1-yl]-1,3-dimethyl-8,10-dihydroindeno[5,6-c]chromene-9,9(6H)-dicarboxylate	C33 H32 O6	524.222	9.473	Full match	No results	No results	728561	284290	317774	293031	499921	712000	502115	206960	343668	710131	129008	100188	1.42343	0.509375	0.199502	0.694444	0.688145
Com_3076_pos	Dimethyl 4-methyl-5-(3-methylbut-2-enyl)-2-oxocyclohex-3-ene-1,3-dicarboxylate	C16 H22 O5	294.146	13.408	Full match	No results	No results	6.07993e+06	6.70758e+06	7.53037e+06	4.96481e+06	5.45291e+06	3.71402e+06	3.9039e+06	6.84878e+06	5.02632e+06	2.94332e+06	3.71503e+06	8.86146e+06	1.10067	0.138379	0.484994	0.583333	0.194979
Com_3077_pos	Dimethyl 3-[(2-methyl-2-propanyl)oxy]-4-vinyl-1,1-cyclopentanedicarboxylate	C15 H24 O5	284.162	12.613	Full match	Invalid mass	No results	53713.1	55544.6	51135.3	48643.6	41364.7	50214.7	20025.2	39397.2	23301	20815.3	38729.2	24216.5	1.80567	0.852536	0.00288185	1	0.828879
Com_3078_pos	Dimethyl 3-(5-chloro-2-hydroxybenzoyl)-7,12-dihydroindolo[2,3-a]quinolizine-1,12b(6H)-dicarboxylate	C26 H21 Cl N2 O6	492.11	13.034	Full match	No results	No results	154814	163654	148076	211228	142232	112275	273887	357903	273872	350149	272264	342396	0.49842	-1.00457	7.37048e-05	1	0.928698
Com_3079_pos	Dimethyl 3-(2-hydroxybenzoyl)-9-methyl-7,12-dihydroindolo[2,3-a]quinolizine-1,12b(6H)-dicarboxylate	C27 H24 N2 O6	472.162	8.358	Full match	No results	No results	7712.79	6575.37	5950.32	7659.79	5147.54	5522.24	10055.7	5681.1	10571.8	8698.02	5290.99	5331.53	0.845251	-0.242549	0.395212	0.611111	0.191436
Com_307_pos	Toceranib	C22 H25 F N4 O2	396.197	14.308	Full match	No results	No results	38630.3	14934.2	21844.8	27711	19295.4	47380.1	12425.7	15655.4	16099.4	19129.6	10569.2	5615.6	2.13593	1.09487	0.0140458	0.916667	0.985032
Com_3080_pos	Dimethyl 2,6-dimethyl-4-(2-nitrophenyl)-3,5-pyridinedicarboxylate	C17 H16 N2 O6	344.099	8.5	Full match	Invalid mass	No results	899954	1.01228e+06	923191	885886	762982	638129	803088	498837	709902	568706	388617	498084	1.47738	0.563041	0.0115149	0.916667	0.54863
Com_3081_pos	Dimethyl 2,15-dibenzyl-4,13-dioxo-3,5,12,14-tetraazahexadecane-1,16-dioate (non-preferred name)	C28 H38 N4 O6	526.279	11.483	Full match	Invalid mass	No results	230776	114830	77976.4	111080	146574	267070	36830.1	50057.9	152938	48177.4	33690	38327.6	2.63404	1.39727	0.00613091	0.888889	1.36827
Com_3084_pos	Dimethyl 2-(cyclohexylcarbonyl)succinate	C13 H20 O5	256.13	14.126	Full match	No results	No results	137550	118068	82984	111565	117754	123330	45812.8	80109.8	87560.1	77896.8	61861.7	58418.2	1.67918	0.747757	0.00180248	0.972222	0.697334
Com_3085_pos	Dimethyl 11,11'-[(9-oxo-9H-thioxanthene-4,5-diyl)bis(oxy)]diundecanoate	C37 H52 O7 S	640.345	12.174	Full match	No results	No results	902745	761082	858082	846666	919530	1.19333e+06	180793	692567	597758	456795	428960	430302	1.96666	0.975749	0.0098274	1	0.977658
Com_3086_pos	Dimethyl 1,5-dimethyl-7-oxo-6-oxabicyclo[3.2.0]heptane-3,3-dicarboxylate	C12 H16 O6	256.094	12.314	Full match	Invalid mass	No results	1.58681e+07	1.65737e+07	1.68589e+07	1.84694e+07	1.79116e+07	1.66035e+07	9.39047e+06	1.61701e+07	1.40633e+07	8.17446e+06	1.19846e+07	1.34646e+07	1.39643	0.481744	0.0181997	0.972222	0.472879
Com_3087_pos	Dimethyl 1,4-cyclohexanedicarboxylate	C10 H16 O4	200.105	10.508	Full match	No results	No results	228723	157253	139087	174031	157690	158849	150367	137135	138690	158519	127020	120481	1.2204	0.28736	0.0448561	0.888889	0.250924
Com_308_pos	Tocainide	C11 H16 N2 O	192.126	6.066	Full match	No results	No results	77916.8	72808.7	70266.5	74683.9	237210	85547.1	49513.4	65860	65054	54987.7	44733.8	71318.3	1.75958	0.815228	0.0613434	0.972222	0.614214
Com_3090_pos	Dimethyl (2Z,2'E)-2,2'-{(3S,7R,8E,11S,12S,15R,17R,21R,23R,25S)-12,25-diacetoxy-1,11,21-trihydroxy-17-[(1R)-1-hydroxyethyl]-10,10,26,26-tetramethyl-19-oxo-18,27,28,29-tetraoxatetracyclo[21.3.1.1~3,7~.1~11,15~]nonacos-8-ene-5,13-diylidene}diacetate	C41 H60 O17	824.383	12.038	Full match	No results	No results	5978.83	6021.41	6503.94	6221.91	5372.15	6274.88	6465.04	6237.32	10554.7	5779.73	6573.44	6170.57	0.870571	-0.199967	0.253776	0.694444	0.156825
Com_3093_pos	Dimethyl (2-oxopropyl)malonate	C8 H12 O5	188.068	2.358	Full match	No results	No results	9955.17	6288.81	9703.81	10319	7769.84	12751.7	4965.44	7930	10546.9	8252.16	12254.6	7242.71	1.10933	0.149686	0.482523	0.583333	0.174863
Com_309_pos	TOBORINONE	C21 H24 N2 O5	384.169	10.652	Full match	No results	No results	15109.7	19096.9	9866.02	10632	9639.52	9892.01	14069.2	16335	12761.4	11614.4	11396.7	11371.4	0.957291	-0.0629709	0.60373	0.694444	0.0965967
Com_30_pos	zeaxanthin bis(beta-D-glucoside)	C52 H76 O12	892.532	13.133	Full match	No results	No results	6216.26	6114.1	5823.63	6354.93	5842.78	6187.32	6106.5	6422.13	6315.31	6521.3	6165.36	6204.42	0.968305	-0.0464665	0.100155	0.722222	0.043196
Com_3101_pos	Dimethyl (2-oxocyclopentyl)malonate	C10 H14 O5	214.084	13.175	Full match	No results	No results	16898.9	15881.7	16556.8	16361.1	15459.2	17476.7	17101.1	20806.3	17575.1	16586	16960.3	16440.5	0.935195	-0.0966613	0.148212	0.805556	0.0862264
Com_3102_pos	Dimethyl (2-methoxyphenyl)malonate	C12 H14 O5	238.083	13.199	Full match	No results	No results	191566	186677	175080	265469	185664	212511	204263	202563	230950	202075	185236	198150	0.994875	-0.00741335	0.854606	0.611111	0.0179126
Com_3104_pos	Dimethyl (2E,4Z,6E,8E,10E,12E,14E,16E,18E)-4,8,13,17-tetramethyl-2,4,6,8,10,12,14,16,18-icosanonaenedioate	C26 H32 O4	408.229	11.212	Full match	No results	No results	37862.9	36899.9	54270.1	39471.5	48962.9	46516.3	31440.4	48875.6	25694.8	22472.1	11868.5	18327.4	1.66364	0.734339	0.0279043	0.888889	0.791521
Com_3107_pos	Dimethoxymethyl-benzene	C9 H12 O2	152.083	9.193	Full match	No results	No results	372821	442296	258482	296992	289913	266438	249506	264284	321926	274276	209851	236573	1.23806	0.308086	0.0835158	0.805556	0.268939
Com_3108_pos	DIMEFURON	C15 H19 Cl N4 O3	338.115	7.76	Full match	Invalid mass	No results	58410.4	56039	60124.9	70319.6	61257.5	67935.4	81856.2	75204.4	68616.3	64455.8	52195.5	63429.4	0.921946	-0.117245	0.336701	0.694444	0.101464
Com_3109_pos	Dimedone	C8 H12 O2	140.084	7.606	Full match	No results	No results	191086	219891	190454	192006	252704	194736	154188	126181	187510	146608	109370	112270	1.48408	0.569565	0.0030986	1	0.541882
Com_310_pos	Tisocalcitate	C31 H48 O5	500.35	14.429	Full match	Invalid mass	No results	1.03044e+07	1.2552e+07	1.51505e+07	1.42027e+07	1.36493e+07	1.1953e+07	1.25344e+07	2.48087e+07	2.48231e+07	2.1549e+07	2.12837e+07	2.12677e+07	0.616251	-0.698411	0.00436734	0.888889	0.615203
Com_3110_pos	Diisononylphthalate	C26 H42 O4	418.307	12.761	Full match	No results	No results	1.58816e+06	1.6985e+06	1.66252e+06	1.58275e+06	1.23831e+06	1.54782e+06	737830	1.43737e+06	1.17303e+06	721458	1.0523e+06	1.07381e+06	1.50393	0.588738	0.0091084	0.972222	0.569358
Com_3112_pos	dihydrozeatin riboside	C15 H23 N5 O5	353.171	11.101	Full match	No results	No results	2993.2	2063.1	2260.03	2220.23	2433.84	2349.83	3964.14	3030.52	2977.77	2984.77	3034.6	3055.49	0.751825	-0.411532	0.00207405	0.944444	0.377148
Com_3113_pos	Dihydroxyindole	C8 H7 N O2	149.047	1.338	Full match	Invalid mass	No results	698109	874721	845955	1.17278e+06	726077	693039	443710	376230	425731	381286	599126	296753	1.98613	0.989961	0.000274041	1	0.909166
Com_3117_pos	DIHYDROSAMIDIN	C21 H24 O7	388.151	9.396	Full match	No results	No results	72308.5	45005.4	60012.2	47257.6	59767.6	45152.3	82218.1	57888.1	50435.5	80029.2	27266.7	38207.2	0.980534	-0.0283606	0.855063	0.5	0.143447
Com_3119_pos	Dihydrojasmone	C11 H18 O	166.136	12.708	Full match	No results	No results	63309.3	56394.7	60759.8	50327.2	61800.4	50221.7	62648.5	53201.4	56311.9	79630.7	79585.3	60237.2	0.875383	-0.192014	0.166853	0.666667	0.164701
Com_3126_pos	Dihydrofolic acid	C19 H21 N7 O6	443.157	7.351	Full match	No results	No results	96037	59058.4	47410.1	24065.1	88425.9	25793.1	45443.5	460492	25689.3	30685.2	206495	278645	0.325352	-1.61993	0.257123	0.638889	0.981272
Com_3127_pos	dihydroergocristine	C35 H41 N5 O5	611.314	12.865	Full match	No results	No results	344652	499492	343481	538161	484999	468015	165724	161437	322435	356687	137428	238714	1.93776	0.954386	0.00505651	0.944444	0.946482
Com_312_pos	Tipelukast	C29 H38 O7 S	530.233	10.514	Full match	No results	No results	16120.3	13321.7	14577.2	13321.1	14857	13233.5	20185.5	19238	17633.4	16247.7	12928.9	14391.5	0.849001	-0.236163	0.0852938	0.75	0.205302
Com_3130_pos	dihydroconiferyl alcohol glucoside	C16 H24 O8	344.146	12.785	Full match	No results	No results	810345	566026	639510	607154	823063	552074	351586	462287	413708	409013	254777	328865	1.80079	0.848627	0.000407776	1	0.783104
Com_3132_pos	Dihydroberberine	C20 H19 N O4	337.13	7.567	Full match	No results	No results	7373.41	8294.81	4587.47	5867.16	3772.17	7558.6	5527.1	5276.47	4835.63	11118.6	5671.84	8586.95	0.913132	-0.131105	0.67086	0.444444	0.106662
Com_3135_pos	Dihomo-gamma-linolenic acid	C20 H34 O2	306.255	12.356	Full match	No results	No results	675298	537912	667338	720500	596954	588992	318019	516034	363460	242453	316421	344746	1.80236	0.849884	0.00090804	1	0.802041
Com_3139_pos	Dihexyl phthalate	C20 H30 O4	334.213	14.132	Full match	No results	No results	4052.51	4348.2	2232.79	2201.4	2226.31	4643.44	2109.08	2014.67	4117.93	3628.88	1861.05	2329.64	1.22685	0.294953	0.356121	0.722222	0.267766
Com_3142_pos	digoxin	C41 H64 O14	780.426	12.722	Full match	No results	No results	144597	133007	147155	154450	149005	182582	76494	104029	114077	124370	126544	108320	1.39301	0.478202	0.00435351	1	0.446904
Com_3146_pos	Diginatin	C41 H64 O15	796.422	12.653	Full match	No results	No results	394181	246362	267237	181119	285039	288694	142543	204687	202878	228175	251822	193002	1.35935	0.442918	0.0477007	0.833333	0.389753
Com_3148_pos	Difluprednate	C27 H34 F2 O7	508.228	11.854	Full match	Invalid mass	No results	196415	365304	679143	115205	312198	396328	1.9862e+06	3.74191e+06	6.42737e+06	2.0319e+06	650898	1.91199e+06	0.123257	-3.02025	0.00061113	0.972222	2.657
Com_3149_pos	Difluoro(methyl 4-{2-[cyano(2-pyridinyl-kappaN)methylene]hydrazino-kappaN~1~}benzoatato)boron	C15 H11 B F2 N4 O2	328.093	8.531	Full match	No results	No results	6690.46	7822.54	6824.6	8872.74	7996.27	8656.49	11866.7	7891.9	8873.92	12713.8	6496.54	8041.24	0.838577	-0.253984	0.22531	0.694444	0.212669
Com_314_pos	timobesone acetate	C24 H31 F O5 S	450.185	6.231	Full match	No results	No results	27060.7	26400.4	26449.2	41390	25972.9	27515.9	21256.6	13395.5	10298	23570.7	32797.9	16530.5	1.48316	0.568673	0.0461244	0.861111	0.599877
Com_3150_pos	DIFLUCORTOLONE PIVALATE	C27 H36 F2 O5	478.254	10.931	Full match	Not the top hit	No results	435525	279193	270287	283909	298650	310519	356333	216838	228879	317476	180971	204558	1.24785	0.319445	0.101469	0.722222	0.317399
Com_3152_pos	Diflucortolone	C22 H28 F2 O4	394.195	9.653	Full match	No results	No results	42613.9	34177.6	33787.3	36893.2	41369.1	41049.5	46146.2	37176.2	41877.8	42513.9	44395.1	31763.2	0.942667	-0.0851792	0.446568	0.694444	0.0772513
Com_3153_pos	Diffutin	C23 H28 O10	464.166	9.121	Full match	No results	No results	15357.8	17278.1	15348.3	8124.11	12242.2	11920.9	16183.1	13807	11361.5	15821.5	5745.78	11108.1	1.08435	0.116836	0.595166	0.583333	0.215247
Com_3154_pos	Difeterol	C25 H29 N O2	375.218	8.735	Full match	No results	No results	1.80023e+06	1.14195e+06	1.45846e+06	1.31548e+06	892227	1.55833e+06	1.39659e+06	693079	539510	1.07712e+06	2.14969e+06	892511	1.21015	0.275184	0.268601	0.694444	0.379663
Com_3156_pos	Diethyl phthalate	C12 H14 O4	222.089	11.482	Full match	Invalid mass	No results	1.28442e+06	1.30875e+06	1.49939e+06	1.37365e+06	1.25381e+06	1.46936e+06	1.35418e+06	913136	1.27279e+06	1.44613e+06	1.49309e+06	1.33171e+06	1.04844	0.0682399	0.490337	0.444444	0.0766992
Com_315_pos	tilmacoxib	C16 H19 F N2 O3 S	338.11	8.503	Full match	Invalid mass	No results	639982	522481	401364	407683	656267	607796	634828	250029	355280	914562	167494	253424	1.25623	0.329103	0.212288	0.722222	0.5417
Com_3160_pos	Diethyl ethylidenemalonate	C9 H14 O4	186.089	7.622	Full match	No results	No results	255305	233058	186532	195154	268050	201599	159282	134841	199428	118595	118535	130616	1.55544	0.637325	0.00165105	0.944444	0.593571
Com_3162_pos	Diethyl ethoxymethylenemalonate	C10 H16 O5	216.099	0.556	Full match	No results	No results	16045.3	5104.47	11823.4	11391.5	15861.1	15753.2	16139.4	13879.7	15449.1	10933.3	16475.9	15019.2	0.864413	-0.210208	0.323667	0.611111	0.273034
Com_3167_pos	Diethyl diallylmalonate	C13 H20 O4	240.136	14.524	Full match	No results	No results	215543	226525	222541	247643	244556	175970	232832	435140	329425	418699	250832	316882	0.671828	-0.573837	0.0135705	0.944444	0.495429
Com_3170_pos	Diethyl 5-[(trimethylsilyl)ethynyl]isophthalate	C17 H22 O4 Si	318.128	7.325	Full match	Invalid mass	No results	367111	485784	475891	589388	738109	521837	527799	450275	586425	328384	486160	551191	1.0846	0.117158	0.568472	0.444444	0.0996251
Com_3174_pos	Diethyl 3-cyclopentene-1,1-dicarboxylate	C11 H16 O4	212.105	10.863	Full match	No results	No results	4020.27	2952.43	5765.44	3827.65	3076.24	3842.45	4898.58	5681.71	3888.34	4822.1	4301.65	3616.14	0.86313	-0.212351	0.20933	0.722222	0.211342
Com_3175_pos	Diethyl 2-butyrylsuccinate	C12 H20 O5	244.13	10.502	Full match	No results	No results	473047	210886	125341	235186	262756	284034	31542.2	44805.1	42695.1	40280.2	35497.9	28689.7	7.11936	2.83175	3.14026e-05	1	2.49531
Com_3176_pos	Diethyl 1-(4-pentenoyl)-2,3-piperidinedicarboxylate	C16 H25 N O5	311.172	10.684	Full match	No results	No results	40203.9	20506.8	30028.9	23740.3	19002.3	18345	8746.88	7808.94	8552.8	11651.9	9258.54	11085.8	2.65875	1.41075	0.000199977	1	1.2455
Com_3177_pos	Diethyl [(7-chloro-1H-indol-3-yl)methyl](formamido)malonate	C17 H19 Cl N2 O5	366.098	8.325	Full match	No results	No results	31843.2	25842.1	29960.3	35041.5	33321.7	28968.5	25062.1	19415.6	28193.8	19639.5	9930.77	20414.5	1.50809	0.592727	0.0264468	0.972222	0.615455
Com_3179_pos	Diethyl (1-ethoxy-2-oxopentyl)malonate	C14 H24 O6	288.157	11.038	Full match	No results	No results	105211	101640	101259	84154.6	99949.6	94177.2	65388.4	48707.7	44419.2	68396.2	63098.8	47139.9	1.73926	0.798471	0.000321044	1	0.743711
Com_3181_pos	Dicyclohexyl(9-methyl-9H-fluoren-9-yl)phosphine	C26 H33 P	376.231	5.816	Full match	No results	No results	51807.2	72365.5	33864.1	39297.5	75624	13586.5	46469.4	53853.1	141632	71237	19704.3	65645.8	0.718984	-0.475969	0.422238	0.611111	0.468914
Com_3183_pos	Dicyclohexyl phthalate	C20 H26 O4	330.182	11.543	Full match	No results	No results	47003.7	53911.7	37284.7	49140.7	45317	57595.5	20142.7	3353.66	39662.2	42025.9	45612.5	40153.2	1.52005	0.604115	0.1634	0.861111	0.895825
Com_3184_pos	Diclofop	C15 H12 Cl2 O4	326.011	1.319	Full match	Invalid mass	No results	87124	44187.7	88127.7	63195.4	80425.4	57585.4	131757	55360.3	93151.3	99237.8	130383	69853.9	0.725572	-0.462809	0.122944	0.777778	0.399133
Com_3189_pos	Dicirenone	C26 H36 O5	428.255	12.846	Full match	Invalid mass	No results	9.45866e+07	9.69578e+07	9.61849e+07	4.58655e+07	1.10518e+08	6.19382e+07	1.26756e+08	1.37764e+08	1.27566e+08	1.19624e+08	1.03607e+08	1.30531e+08	0.678491	-0.559598	0.0261572	0.972222	0.56467
Com_3190_pos	dichlorvos	C4 H7 Cl2 O4 P	219.946	10.072	Full match	No results	No results	9340.47	8548.05	7861.34	6337.41	6254.48	6746.21	9426.65	9100.28	8520.72	8224.83	10744.4	8673.7	0.824419	-0.27855	0.0339301	0.833333	0.267595
Com_319_pos	tiapride	C15 H24 N2 O4 S	328.147	9.732	Full match	No results	No results	2325.81	2173.45	2348.8	2628.67	2147.17	2255.43	2727.75	3820.29	2552.58	2526.4	3786.37	5449.84	0.665253	-0.588025	0.0302806	0.944444	0.491492
Com_3205_pos	Dibutyl sebacate	C18 H34 O4	314.244	14.837	Full match	No results	No results	21019.6	13571.9	14802.7	16679.3	53749.5	18326.8	25292.8	16914.3	24980.2	26693.7	26112.7	18278.2	0.999118	-0.00127273	0.627269	0.722222	0.147662
Com_3209_pos	Dibutyl phthalate	C16 H22 O4	278.151	13.462	Full match	Full match	No results	8.03887e+06	6.43106e+06	8.61397e+06	7.12734e+06	6.22545e+06	1.09802e+07	9.25731e+06	8.41184e+06	6.77857e+06	9.49194e+06	1.22143e+07	6.97337e+06	0.892514	-0.164053	0.385272	0.666667	0.164244
Com_320_pos	tiapamil	C26 H37 N O8 S2	555.198	7.911	Full match	No results	No results	118794	102923	86071.7	20924.2	110906	190071	36402.3	118535	64081	31982.6	22113.5	26553.7	2.10129	1.07127	0.0915138	0.75	0.989736
Com_3211_pos	Dibenzylmethane	C15 H16	196.125	12.31	Full match	No results	No results	520087	537210	566563	594144	552935	556885	374854	554243	462238	310032	461632	442812	1.27708	0.352847	0.0236963	0.916667	0.343157
Com_3214_pos	Dibenzofuran	C12 H8 O	168.057	7.597	Full match	No results	No results	78593.2	127038	132521	168541	153545	150974	115724	103236	125310	67392.3	86932	106223	1.34125	0.423578	0.0765524	0.861111	0.377894
Com_3216_pos	Dibenzo(h,rst)Pentaphene	C28 H16	352.126	6.734	Full match	No results	No results	15010.9	13649.9	10858.3	12650.1	15325.8	18575.4	14754.1	12376.5	9615.58	11686.8	11873.8	9496.89	1.23304	0.302215	0.067558	0.833333	0.274169
Com_3217_pos	Dibekacin	C18 H37 N5 O8	451.264	11.935	Full match	No results	No results	128503	111845	139536	117506	103246	119944	40387.5	46012.8	37958.1	42649.8	30720.5	27427.4	3.20035	1.67823	2.21952e-06	1	1.54579
Com_3218_pos	diazepinomicin	C28 H34 N2 O4	462.25	7.894	Full match	No results	No results	31623.8	21420.9	19037.5	25353.6	20109	23260.3	5539.23	4204.33	4075.7	4393.83	13585.9	4154.75	3.91629	1.96949	0.000273025	1	1.92851
Com_3219_pos	Diallyl disulfide	C6 H10 S2	146.023	1.04	Full match	No results	No results	793337	643942	988565	944106	667743	740483	820837	784529	860406	916692	664218	775120	0.990952	-0.0131125	0.843748	0.527778	0.0564254
Com_3220_pos	diadinoxanthin	C40 H54 O3	582.406	14.482	Full match	Invalid mass	No results	98820.1	66091.6	50782.1	69925.3	56572	90606.5	1.16506e+06	1.2881e+06	895933	927332	1.51571e+06	655242	0.0671277	-3.89695	1.65299e-08	1	3.54887
Com_3221_pos	Di-2,3-dihydro-1H-inden-2-ylsilane	C18 H20 Si	264.133	11.227	Full match	No results	No results	70478.1	115147	51363.9	60822.9	54460.9	65642	30092.4	20828.7	27009.7	19786.4	29253	28093.2	2.69512	1.43035	9.59829e-05	1	1.26961
Com_3223_pos	Dhurrin	C14 H17 N O7	311.099	6.527	Full match	No results	No results	14058.9	15990.9	18968.3	37256.5	39040	43644.9	12558.3	13371.6	14140.5	11256.2	21044.8	17632.5	1.87725	0.908618	0.0452868	0.833333	0.727538
Com_3225_pos	DEXAMETHASONE TEBUTATE	C28 H39 F O6	490.272	8.899	Full match	No results	No results	3413.13	4344.17	3265.05	4421	3968.2	3254.55	2893.59	2235.51	2391.09	2949.36	2750.45	2410.35	1.45013	0.536186	0.000647367	1	0.484668
Com_3227_pos	DEXAMETHASONE PHENYLPROPIONATE	C31 H37 F O6	524.259	10.705	Full match	No results	No results	159605	122774	115016	106373	171336	182954	22179.7	23216	24198.7	26301.3	26336.1	27020.5	5.74905	2.52332	1.62314e-06	1	2.27407
Com_3230_pos	Desthiobiotin	C10 H18 N2 O3	214.131	6.723	Full match	No results	No results	95549.9	64595.7	96348.3	74009	87347.6	91554.3	78153.6	46551.4	65232.9	89176.5	39432	47930.6	1.39	0.47509	0.0418241	0.833333	0.495405
Com_3231_pos	Desoxycorticosterone Pivalate	C26 H38 O4	414.276	11.691	Full match	Invalid mass	No results	1.72446e+06	2.39858e+06	2.829e+06	2.9275e+06	1.96659e+06	1.70737e+06	1.60541e+06	4.41394e+06	3.06248e+06	957661	1.67479e+06	2.49507e+06	0.953844	-0.068174	0.851918	0.555556	0.0618089
Com_3233_pos	Desoxycorticosterone acetate	C23 H32 O4	372.229	11.612	Full match	No results	No results	5598.65	3705.08	5108.38	4748.05	5600.66	6483.24	4949.86	5166.8	4009.42	4333.12	3754.61	4967.09	1.14949	0.200989	0.19694	0.722222	0.17388
Com_3236_pos	Desaminotyrosine	C9 H10 O3	166.063	12.318	Full match	No results	No results	1.13822e+06	1.02914e+06	1.47123e+06	1.49949e+06	1.00657e+06	1.3033e+06	808982	1.45694e+06	1.50675e+06	884754	1.0196e+06	1.08208e+06	1.10191	0.14001	0.399468	0.638889	0.1469
Com_3237_pos	D-Erythrose 4-phosphate	C4 H9 O7 P	200.008	1.116	Full match	No results	No results	558620	459426	501035	452659	478156	527514	677617	616506	487325	707638	634881	566780	0.806723	-0.309855	0.0109075	0.916667	0.277191
Com_323_pos	Tiamulin	C28 H47 N O4 S	493.325	10.852	Full match	Full match	No results	2.47824e+06	1.97817e+06	2.95605e+06	2.00436e+06	2.14035e+06	2.16708e+06	1.06983e+06	1.28469e+06	1.03146e+06	952152	944649	671089	2.3051	1.20483	2.48389e-05	1	1.10897
Com_3240_pos	Deoxyshikonin	C16 H16 O4	272.104	7.972	Full match	No results	No results	8512.54	5077.97	4377.96	6543.1	7127.99	6092.61	7066.09	7350.42	4799.2	7297.92	5503.57	3696.19	1.05653	0.0793302	0.686477	0.527778	0.0985517
Com_3241_pos	Deoxyloganin tetraacetate	C25 H34 O13	542.203	10.763	Full match	No results	No results	16171.7	16839	18584.6	18235.7	16139.4	16967.6	40602.3	58092.4	99250.2	33719.4	16234.7	54809.1	0.340057	-1.55615	0.0128337	0.888889	1.2412
Com_3242_pos	Deoxycorticosterone 21-glucoside	C27 H40 O8	492.272	11.397	No match	Full match	No results	724359	378059	289276	404470	461147	717660	155213	208750	276031	149712	106195	136722	2.88098	1.52656	0.000425386	1	1.38096
Com_3244_pos	Deoxycholic acid	C24 H40 O4	392.291	14.46	Full match	No results	No results	658872	767172	807456	1.03411e+06	806569	654078	299386	330445	470375	350391	252573	416835	2.23031	1.15724	4.93295e-05	1	1.07101
Com_3246_pos	Denopamine	C18 H23 N O4	317.162	8.218	Full match	No results	No results	9888.58	8529.07	8631.45	8921.36	8394.56	9595.17	10897.5	9418.71	9221.79	13859	7392.27	7782.9	0.92126	-0.118319	0.556143	0.555556	0.0926765
Com_3247_pos	dendrodolide A	C13 H20 O5	256.13	11.045	Full match	Invalid mass	No results	156772	182838	136280	145773	158320	181652	51753.3	44882.7	37455.1	59360.5	60234.3	42469.4	3.24707	1.69914	8.43474e-07	1	1.55997
Com_3248_pos	Demethylalangiside	C24 H29 N O10	491.179	8.666	Full match	No results	No results	283206	153945	185218	140617	297766	182338	211624	116151	182462	316874	154104	80569.8	1.17076	0.227441	0.394358	0.583333	0.283887
Com_324_pos	tiadenol	C14 H30 O2 S2	294.168	5.666	Full match	No results	No results	5999.46	13041.2	12456.5	14030	9423.88	6744.58	65605.7	58637.9	284489	163501	51310.8	88062.5	0.0866989	-3.52784	9.79457e-05	1	3.01409
Com_3251_pos	Deltorphin	C44 H62 N10 O10 S2	954.407	14.521	Full match	No results	No results	25750.6	38640.1	37292.8	38925.4	43680.7	38565.4	39600.5	65662.5	35216.4	36878.2	42039	53478.7	0.816692	-0.292136	0.157602	0.666667	0.250646
Com_3255_pos	deltoin	C19 H20 O5	328.13	6.951	Full match	Invalid mass	No results	71579.3	54450.9	60712.9	65943.3	66088	49686.1	71554.3	72261.6	56475.9	53803.2	40342.2	42216	1.09448	0.130246	0.378855	0.611111	0.146249
Com_3256_pos	delta-Valerolactone	C5 H8 O2	100.052	12.324	Full match	Invalid mass	No results	421580	448151	465000	568448	450507	466393	345253	342671	370143	244596	341238	334216	1.42564	0.511607	0.000842305	1	0.471068
Com_3257_pos	Delavirdine	C22 H28 N6 O3 S	456.197	9.076	Full match	No results	No results	10478.4	9571.34	8282.81	12466.3	6954.61	10371.1	11135.7	7152.01	7989.48	9413.48	5726.94	4798.13	1.25768	0.330765	0.132998	0.75	0.333233
Com_3258_pos	Delamanid	C25 H25 F3 N4 O6	534.173	8.923	Full match	No results	No results	17883.3	18221.2	27414.3	22816.1	20584.6	14820.6	18458.7	14046.7	10480.3	19083.7	10187.9	18811.5	1.33679	0.418776	0.0690183	0.75	0.418232
Com_3259_pos	Deidaclin	C12 H17 N O6	271.105	1.329	Full match	No results	No results	382671	181706	184970	221220	237564	185591	308432	190692	266479	212638	237374	161161	1.01231	0.0176488	0.986056	0.555556	0.0300719
Com_325_pos	Thymopentin	C30 H49 N9 O9	679.367	11.319	Full match	No results	No results	6304.49	4919.04	5962.61	4828.48	5541.05	7454.5	4466.31	5534.88	4727.24	3033.05	3208.9	1957.49	1.52697	0.610672	0.0283422	0.944444	0.614968
Com_3260_pos	dehypoxanthine futalosine	C14 H16 O7	296.089	10.554	Full match	No results	No results	30569	34008.6	32974.9	35403.6	33545.1	33598.6	39139.5	107259	57973.2	29041.9	32409.8	45265	0.643225	-0.636606	0.142818	0.694444	0.444293
Com_3265_pos	Dehydrovomifoliol	C13 H18 O3	222.125	7.034	Full match	No results	No results	76686.5	27740.3	54127.6	25573.6	46632	55252.8	120411	25438.7	50534.1	341596	109486	55428.5	0.406907	-1.29723	0.166922	0.722222	0.822588
Com_3266_pos	Dehydrosoyasaponin I	C48 H76 O18	940.499	14.27	Full match	No results	No results	699602	611906	455385	404071	696742	929117	283187	343811	347839	386347	338182	270402	1.92755	0.946767	0.00266466	1	0.821826
Com_3268_pos	Dehydrojuvabione	C16 H24 O3	264.172	12.256	Full match	No results	No results	889042	1.09991e+06	1.45369e+06	2.26783e+06	1.40856e+06	1.48341e+06	904489	1.89883e+06	1.60644e+06	1.0475e+06	1.238e+06	1.65343e+06	1.0304	0.0431982	0.904105	0.472222	0.0330339
Com_326_pos	Thymol	C10 H14 O	150.104	8.351	Full match	No results	No results	138391	105590	93050.3	93818.7	99379.6	91642.5	107022	92654	95822.6	105012	85180.2	77009.8	1.10516	0.144251	0.270258	0.638889	0.126
Com_3271_pos	Dehydroglycine	C2 H3 N O2	73.0161	1.18	Full match	No results	No results	640056	529013	648531	491623	574798	603690	736929	651691	654534	775604	2.37068e+06	1.15575e+06	0.549662	-0.863384	0.0661493	1	0.653502
Com_3273_pos	Dehydrofalcarinone	C17 H20 O	240.151	13.093	Full match	Invalid mass	No results	4.98166e+06	4.65589e+06	4.97847e+06	5.0726e+06	4.59725e+06	5.21625e+06	6.515e+06	5.20903e+06	5.45556e+06	4.64171e+06	4.83643e+06	4.95412e+06	0.933261	-0.0996469	0.273735	0.611111	0.0841628
Com_3277_pos	Dehydroepiandrosterone	C19 H28 O2	288.208	12.314	Full match	Invalid mass	No results	1.13387e+06	2.21553e+06	1.7903e+06	2.48768e+06	1.9425e+06	1.6706e+06	1.01533e+06	1.77693e+06	1.40031e+06	874342	1.0885e+06	1.3026e+06	1.50717	0.591841	0.0229954	0.888889	0.536754
Com_3281_pos	dehydro-D-arabinono-1,4-lactone	C5 H6 O5	146.021	1.646	Full match	Invalid mass	No results	8.97734e+06	1.60612e+07	1.13266e+07	9.41377e+06	8.72297e+06	1.31459e+07	3.70874e+06	5.80275e+06	6.34197e+06	3.0059e+06	2.98162e+06	3.87691e+06	2.63038	1.39527	0.000183914	1	1.29925
Com_3288_pos	DEHYDROASCORBIC ACID	C6 H6 O6	174.016	1.323	Full match	No results	No results	1.98078e+06	2.153e+06	1.85064e+06	2.15003e+06	1.89751e+06	1.8748e+06	864591	859083	821793	677915	1.51639e+06	890885	2.11463	1.0804	0.000613709	1	1.02861
Com_3289_pos	DEHA	C22 H42 O4	370.307	14.243	Full match	No results	No results	459326	352616	856794	953258	501725	1.20113e+06	1.49493e+06	224997	727774	208016	329228	1.25942e+06	1.01896	0.0270999	0.599817	0.583333	0.331211
Com_3290_pos	Degarelix	C82 H103 Cl N18 O16	1630.75	12.766	Full match	No results	No results	168126	105129	119018	54260.9	142728	110296	570253	192744	448742	558975	318430	279251	0.295372	-1.75939	0.000486149	1	1.58299
Com_3295_pos	DEET	C12 H17 N O	191.131	11.441	Full match	No results	No results	119482	105776	117244	83612.5	105941	123647	97372.7	81178.9	120700	100928	101527	154429	0.99934	-0.000952469	0.912758	0.611111	0.0481358
Com_3296_pos	Decursin	C19 H20 O5	328.13	8.602	Full match	Invalid mass	No results	2.62553e+06	2.5549e+06	2.44059e+06	2.15757e+06	2.37996e+06	2.01535e+06	4.27594e+06	2.86745e+06	3.47413e+06	3.31311e+06	1.88271e+06	2.05338e+06	0.793314	-0.334037	0.202648	0.694444	0.271645
Com_3297_pos	Decoquinate	C24 H35 N O5	417.251	12.629	Full match	No results	No results	8897.35	18361.3	5092.34	18239.4	10455	14108.3	7725	9498.36	14920.4	11207.1	15720.8	10653.6	1.07785	0.108161	0.952049	0.527778	0.130438
Com_3298_pos	Decanophenone	C16 H24 O	232.182	13.506	Partial match	Full match	No results	7.74355e+06	6.98466e+06	7.69131e+06	9.65834e+06	6.87413e+06	7.91675e+06	2.25311e+06	2.48027e+06	1.94425e+06	1.93978e+06	4.48629e+06	2.29636e+06	3.04341	1.60569	9.85162e-05	1	1.51749
Com_329_pos	THTC	C5 H8 O2 S	132.024	1.544	Full match	Invalid mass	No results	6.60067e+06	6.83716e+06	6.39081e+06	1.04785e+07	6.57452e+06	6.82714e+06	2.15306e+06	1.51002e+06	2.71031e+06	2.26273e+06	5.02936e+06	2.61109e+06	2.68538	1.42513	0.000599558	1	1.37063
Com_32_pos	Zeaxanthin	C40 H56 O2	568.427	12.559	Full match	No results	No results	50367.8	61257.5	87568.4	99811.2	76520.8	69521.5	69078.3	100412	98104.6	51656.6	54250.7	55576.5	1.03722	0.0527175	0.757437	0.555556	0.0777382
Com_3300_pos	Decanamide	C10 H21 N O	171.162	12.729	Partial match	Full match	No results	3.76594e+06	3.19083e+06	4.06222e+06	2.81853e+06	3.54561e+06	3.82625e+06	3.89259e+06	3.53806e+06	3.51781e+06	5.86687e+06	6.31688e+06	4.92739e+06	0.755869	-0.403792	0.0626006	0.75	0.342517
Com_3302_pos	deaminohydroxyblasticidin S	C17 H25 N7 O6	423.186	7.029	Full match	Invalid mass	No results	19362.7	12495.2	25633.4	11618	20695.3	12779.3	185087	164265	199453	192942	82205.7	133952	0.107092	-3.22308	3.8658e-07	1	2.94165
Com_3304_pos	dazopride	C15 H23 Cl N4 O2	326.151	9.201	Full match	No results	No results	7635.82	11228.5	7933.31	3848.28	4848.9	5251.26	6163.09	4862.03	4763.72	5313.01	4779.56	9477.87	1.15234	0.20457	0.582855	0.583333	0.165086
Com_330_pos	THREO-SPHINGOSINE, (-)-	C18 H37 N O2	299.282	13.916	Full match	Invalid mass	No results	2.34164e+06	2.00077e+06	1.89289e+06	1.70282e+06	1.67249e+06	2.28644e+06	3.99612e+06	3.30732e+06	2.49467e+06	3.15353e+06	4.94057e+06	2.66439e+06	0.578745	-0.789	0.00232059	1	0.702877
Com_3310_pos	Darapladib	C36 H38 F4 N4 O2 S	666.266	11.883	Full match	Invalid mass	No results	12907	20637.8	31941.9	34875.6	26336.1	31182.4	135562	56834.1	38793.6	47440.7	25905.9	31246.4	0.470188	-1.08869	0.0515463	0.833333	0.850737
Com_3312_pos	danegaptide	C14 H17 N3 O4	291.121	8.569	Full match	No results	No results	25118.7	21569.3	25169.8	29607.4	20514.3	20058.7	20984.1	25617.7	26940.3	18478.9	12436.6	20346.9	1.13808	0.186608	0.280067	0.638889	0.210573
Com_3313_pos	Daminozide	C6 H12 N2 O3	160.085	1.321	Full match	No results	No results	142296	143842	153358	107612	227575	138672	165260	202355	244459	101562	145778	120337	0.932233	-0.101237	0.760504	0.583333	0.0720663
Com_3317_pos	damaurone D	C20 H18 O4	322.12	9.135	Full match	Invalid mass	No results	370510	335044	293837	256144	274873	261354	642139	426099	345688	440806	262196	287520	0.745186	-0.424327	0.122425	0.777778	0.342225
Com_3318_pos	dalvastatin	C24 H31 F O3	386.227	11.627	Full match	No results	No results	187620	139124	119328	210216	191928	203944	139543	86845.5	79331.4	125952	204772	167820	1.30823	0.387614	0.124911	0.722222	0.413694
Com_3319_pos	Dalcotidine	C18 H29 N3 O2	319.227	14.905	Full match	No results	No results	637962	688906	548936	579047	482872	573192	1.04796e+06	858259	534712	1.17004e+06	940131	656243	0.674223	-0.568702	0.0278701	0.833333	0.483669
Com_331_pos	Thionazin	C8 H13 N2 O3 P S	248.038	1.064	Full match	No results	No results	1.3391e+06	1.02059e+06	1.12174e+06	1.05912e+06	1.19793e+06	1.18282e+06	1.5063e+06	1.65822e+06	1.42765e+06	1.3705e+06	1.30275e+06	1.09932e+06	0.827437	-0.273279	0.0258757	0.861111	0.244225
Com_3320_pos	Dalcetrapib	C23 H35 N O2 S	389.238	11.933	Full match	Invalid mass	No results	438413	562682	660159	786338	652581	613011	392219	477950	545953	317027	113061	325851	1.70952	0.773592	0.0402267	0.944444	0.852056
Com_3323_pos	Daidzin	C21 H20 O9	416.11	9.079	Full match	No results	No results	125419	125879	190499	143919	155282	160264	64772	50627.4	38854.8	22625.6	48362.5	55666.7	3.20838	1.68184	0.000189559	1	1.58504
Com_3325_pos	Daidzein	C15 H10 O4	254.057	10.333	Full match	No results	No results	114426	82538.7	72246.7	82554.6	93842.2	41091.3	14534.7	12609.3	12526.8	11690.8	25564.2	33164.5	4.42091	2.14434	6.9122e-05	1	2.00723
Com_3326_pos	Daclatasvir	C40 H50 N8 O6	738.386	11.465	Full match	No results	No results	8713.57	3652.01	5233.86	6602.41	5601.71	9810.87	3363.96	5227.12	9555.35	5727.5	4439.04	5222.93	1.18125	0.24032	0.433209	0.694444	0.218417
Com_3328_pos	D-4-PHOSPHOERYTHRONIC ACID	C4 H9 O8 P	216.004	1.113	Full match	No results	No results	11699.8	14404.5	17982	15247.4	24945.6	18222.9	20257.3	20286.1	16293.1	25133.9	17621.7	18490.1	0.868058	-0.204137	0.22463	0.75	0.215039
Com_3329_pos	D-1-Piperideine-2-carboxylic acid	C6 H9 N O2	127.063	1.222	Full match	Invalid mass	No results	9.83793e+06	9.22105e+06	9.74816e+06	8.99842e+06	1.03851e+07	1.03664e+07	6.90658e+06	7.3953e+06	8.1854e+06	7.21437e+06	6.14382e+06	7.40403e+06	1.35393	0.437158	0.000123463	1	0.403788
Com_332_pos	thiomarinol B	C30 H44 N2 O11 S2	672.242	11.021	Full match	No results	No results	40521.8	31592.8	30427.1	32790.6	23996.5	22338.8	48160.5	47458.2	31654.2	44884.9	29222	36649	0.763217	-0.389835	0.0559088	0.805556	0.356044
Com_3331_pos	D,L-Camphor	C10 H16 O	152.12	14.896	Not the top hit	Full match	No results	3.73987e+06	4.88247e+06	3.94427e+06	3.71615e+06	2.77149e+06	2.82586e+06	3.79496e+06	3.44133e+06	3.41719e+06	3.61251e+06	4.46191e+06	3.36056e+06	0.990567	-0.0136729	0.814696	0.527778	0.0415467
Com_3332_pos	D-(+)-Proline	C5 H9 N O2	115.063	1.304	Partial match	Full match	Full match	9.33206e+06	9.24232e+06	1.31103e+07	1.12818e+07	8.30013e+06	1.25711e+07	4.45385e+06	5.17925e+06	4.30411e+06	4.43452e+06	7.54818e+06	5.20277e+06	2.05116	1.03644	9.25296e-05	1	0.95225
Com_3335_pos	D-(+)-Maltose	C12 H22 O11	342.115	1.328	Not the top hit	Full match	No results	6.62299e+06	2.04809e+07	1.65886e+07	1.45847e+07	1.9294e+07	7.66102e+06	1.80988e+07	1.24712e+07	1.27019e+07	1.17564e+07	1.32852e+07	2.04495e+07	0.960221	-0.0585612	0.642107	0.527778	0.164564
Com_3338_pos	D-(-)-Salicin	C13 H18 O7	286.105	7.653	Full match	No results	No results	53424	36473.1	54820.5	76690	57626.5	47431.3	23887.2	25654.4	33894.8	28960.2	18777.6	21618.1	2.13666	1.09536	0.000204476	1	0.993187
Com_3339_pos	D-(-)-Quinic acid	C7 H12 O6	192.063	1.313	Full match	Full match	No results	1.63278e+06	3.00311e+06	3.93425e+06	5.40837e+06	3.16362e+06	4.68164e+06	3.21181e+06	2.87283e+06	2.14164e+06	2.20273e+06	2.23435e+06	2.05028e+06	1.48323	0.568746	0.114233	0.777778	0.44944
Com_3342_pos	D-(-)-Glutamine	C5 H10 N2 O3	146.069	1.188	Full match	Full match	No results	4.37333e+06	4.74542e+06	4.31233e+06	3.89121e+06	4.37275e+06	5.32186e+06	1.31773e+07	1.29982e+07	1.47386e+07	1.87575e+07	1.95571e+07	1.90622e+07	0.274867	-1.8632	7.17404e-07	1	1.68489
Com_3343_pos	CZC 24832	C15 H17 F N6 O2 S	364.113	7.743	Full match	No results	No results	51648.1	43750.1	69576.1	81374.1	70201.6	56257.5	135951	122307	114467	85833.4	95412.8	105018	0.565726	-0.821824	0.00071752	1	0.761785
Com_3346_pos	Cytosine	C4 H5 N3 O	111.043	1.318	Partial match	Full match	Full match	3.08196e+06	4.03774e+06	3.16714e+06	3.82584e+06	3.45527e+06	3.8322e+06	736051	796586	728281	502072	1.47313e+06	1.03804e+06	4.05754	2.02061	9.27588e-05	1	1.91004
Com_3348_pos	cytidine 5'-monophosphate	C9 H14 N3 O8 P	323.051	1.317	Full match	No results	No results	2.53759e+06	2.4516e+06	2.25079e+06	3.56534e+06	3.09009e+06	3.42609e+06	389058	485736	313766	442748	1.08774e+06	573014	5.26159	2.3955	4.49206e-05	1	2.27729
Com_3349_pos	cystine	C6 H12 N2 O4 S2	240.024	1.84	Full match	Invalid mass	No results	73513.6	73349.1	57541.3	83355.4	81127.7	65359.6	63729.4	44297.7	92655.2	74158	50449.8	69723.7	1.09932	0.136611	0.373721	0.638889	0.168998
Com_334_pos	Thiobenzamide	C7 H7 N S	137.03	1.033	Full match	No results	No results	954181	858632	1.14296e+06	898132	915100	844363	1.00156e+06	848721	651235	1.08299e+06	770133	998285	1.04865	0.0685386	0.544846	0.444444	0.0889869
Com_3354_pos	Cyprodenate	C13 H25 N O2	227.188	13.465	Full match	No results	No results	206254	137396	165929	153008	127058	201140	161288	156092	137140	189039	251822	176580	0.924273	-0.113609	0.531286	0.583333	0.131277
Com_3355_pos	Cyprazepam	C19 H18 Cl N3 O	339.113	6.756	Full match	No results	No results	24291.6	18369.7	20124.3	14845.9	15313.5	13650.3	56613	27257	40196.3	72165.2	16482.7	23034.8	0.452156	-1.14511	0.0293518	0.888889	0.916056
Com_3357_pos	Cypionic acid	C8 H14 O2	142.1	12.532	Full match	No results	No results	162531	238849	232620	267656	184493	308044	126187	175723	167135	92854.3	213771	186243	1.4494	0.535452	0.0360225	0.833333	0.509588
Com_3358_pos	Cynaroside	C21 H20 O11	448.1	8.979	Not the top hit	Full match	Full match	1.24787e+07	1.77624e+07	2.52146e+07	1.6802e+07	1.63606e+07	1.11789e+07	2.66123e+07	1.74397e+07	1.48147e+07	1.16487e+07	9.89154e+06	2.17639e+07	0.976768	-0.0339123	0.99735	0.5	0.135265
Com_3360_pos	CYM5442	C23 H27 N3 O4	409.199	9.45	Full match	No results	No results	242293	191401	195843	271229	242765	248373	13657.5	20730.7	16873.9	12352.4	32938.2	13654.6	12.6299	3.65877	1.91276e-06	1	3.40371
Com_3361_pos	cylindrocyclophane A4	C36 H52 Cl4 O6	720.249	13.81	Full match	No results	No results	384850	315354	307132	409893	410837	436114	335010	246707	409310	297265	327026	344417	1.15535	0.20833	0.139219	0.75	0.193345
Com_3362_pos	Cylcophellitol	C7 H12 O5	176.068	1.325	Full match	Invalid mass	No results	1.25055e+06	1.25914e+06	1.23556e+06	1.15197e+06	997918	1.21372e+06	1.12777e+06	1.67064e+06	2.12772e+06	1.7855e+06	1.31852e+06	1.15781e+06	0.773715	-0.370125	0.0796817	0.75	0.305601
Com_3363_pos	Cyhalofop-butyl	C20 H20 F N O4	357.138	8.897	Full match	No results	No results	67176.1	132620	159965	137413	68369.6	125576	129275	48638.4	72243.7	46394.3	29235.2	83038.6	1.6905	0.757451	0.0533835	0.805556	0.795725
Com_3364_pos	CYCLURON	C11 H22 N2 O	198.173	8.194	Full match	No results	No results	156387	180402	224687	249748	184310	175882	170215	146827	156060	137682	140936	193018	1.23994	0.310265	0.0403229	0.861111	0.278481
Com_3365_pos	Cyclopentolate	C17 H25 N O3	291.183	8.031	Full match	No results	No results	10061.6	8918.6	9498.9	9416.75	9394.88	10380	10809.2	9891.62	10291.8	11991.1	9865	10229.8	0.914268	-0.129311	0.0409559	0.833333	0.116925
Com_3367_pos	Cyclopentanone	C5 H8 O	84.0574	8.156	Full match	No results	No results	280526	241025	346816	240817	268492	261613	125585	99384.7	119510	111079	89039.8	100069	2.54285	1.34644	2.47259e-07	1	1.23013
Com_3377_pos	Cyclohexyl phenyl ketone	C13 H16 O	188.12	8.087	Partial match	Full match	No results	2.86385e+06	2.25094e+06	2.70351e+06	2.2737e+06	2.64875e+06	3.14192e+06	3.29514e+06	1.94375e+06	3.0537e+06	3.00061e+06	1.2979e+06	1.85253e+06	1.09963	0.13702	0.409276	0.555556	0.236438
Com_3381_pos	Cyclohexyl 4-(4-aminophenyl)-2,7,7-trimethyl-5-oxo-1,4,5,6,7,8-hexahydro-3-quinolinecarboxylate	C25 H32 N2 O3	408.24	9.578	Full match	Invalid mass	No results	9276.51	9423.57	10251.7	9627.29	9236.73	8939.95	11168.4	10457.1	12967.4	21665.5	9333.66	11041	0.740616	-0.433203	0.0869807	0.916667	0.350513
Com_3384_pos	Cycloheximide	C15 H23 N O4	281.162	6.736	Full match	No results	No results	4053.54	4294.43	4128.17	3862.85	5097.02	5684.84	4869.7	4075.77	3905.86	5056.18	4763.14	4556.52	0.996095	-0.00564509	0.903119	0.527778	0.0123142
Com_338_pos	Theogallin	C14 H16 O10	344.073	9.143	Full match	No results	No results	7973.86	6983.54	8802.15	7581.39	7992.08	7650.69	24662.4	15411.9	6778.39	12897.5	17527.9	40949.7	0.397399	-1.33134	0.0256356	0.833333	1.02089
Com_3391_pos	cyclohexenone	C6 H8 O	96.0574	12.316	Full match	No results	No results	1.45439e+06	1.96943e+06	1.83439e+06	2.20472e+06	1.67701e+06	1.43826e+06	1.2164e+06	1.97624e+06	1.44841e+06	1.0557e+06	1.13559e+06	1.43717e+06	1.27918	0.355221	0.052468	0.833333	0.33714
Com_339_pos	theaspirane	C13 H22 O	194.167	15.344	Full match	Invalid mass	No results	67270.9	148703	62622.2	71695.2	67533.5	61354.6	204584	133254	132795	104379	152495	67698.2	0.602586	-0.73076	0.0333338	0.861111	0.669388
Com_3402_pos	Cyclohexene	C6 H10	82.0781	6.808	Full match	No results	No results	119146	127994	140594	148966	133280	180846	113540	93109.9	122726	97462.6	60831.2	95638.3	1.45862	0.544607	0.00941577	0.972222	0.525816
Com_340_pos	Thalicarpine	C41 H48 N2 O8	696.338	13.632	Full match	No results	No results	158490	191981	242036	83722.7	117424	90786.4	110539	327632	135367	140964	140031	221582	0.821883	-0.282996	0.427477	0.611111	0.260542
Com_3410_pos	Cyclohexane-1,2-diaminetetraacetic acid	C14 H22 N2 O8	346.138	8.767	Full match	No results	No results	44928.3	42517.4	45735	50225.7	36204.4	20691.6	53548	23180.5	47594.9	32721.7	29574.1	26363	1.12828	0.174119	0.507998	0.583333	0.191251
Com_3416_pos	Cycloheptene	C7 H12	96.0937	14.894	Full match	Invalid mass	No results	181533	213974	240609	230051	196883	173646	213747	238619	181091	213181	232521	205393	0.962745	-0.0547748	0.552291	0.555556	0.0556629
Com_3417_pos	Cyclofenil diphenol	C19 H20 O2	280.145	12.359	Full match	No results	No results	28027.2	33117.7	36558.5	33927.9	34799.5	31690.7	25711.7	41042.4	34266.7	22498	20530.2	19701.9	1.20989	0.274881	0.125904	0.722222	0.29857
Com_3418_pos	Cyclododecyne	C12 H20	164.157	12.646	Full match	No results	No results	3558.61	148625	5337.01	5538.45	3110.73	2853.15	3137.98	9987.32	3320.23	2892.12	3259.27	4154.28	6.31833	2.65954	0.397105	0.583333	0.772712
Com_3419_pos	CYCLOATE	C11 H21 N O S	215.134	1.547	Full match	No results	No results	2618.78	2676.84	4873.37	3103.24	2866.87	3486.34	2346.62	3603.77	1784.63	1386.62	1914.77	2366.66	1.46425	0.550162	0.0351645	0.861111	0.528972
Com_341_pos	thalassospiramide A	C48 H75 N7 O13	957.538	1.13	Full match	No results	No results	2.46748e+06	1.80701e+06	1.88551e+06	2.08179e+06	2.151e+06	1.87955e+06	2.45548e+06	2.73486e+06	2.28734e+06	2.43443e+06	2.57104e+06	2.93078e+06	0.796186	-0.328822	0.00353921	0.916667	0.305009
Com_3420_pos	cycloartenol	C30 H50 O	426.385	15.218	Full match	No results	No results	16283.4	32112.8	22940.5	14725.6	11812.6	20488.3	50117.7	27273.4	11876.9	13895.4	10514.2	11665.9	0.944311	-0.0826655	0.81028	0.638889	0.122403
Com_3421_pos	Cyclo[(4R)-4-hydroxy-L-alloisoleucyl-L-phenylalanyl-L-isoleucyl-L-isoleucyl]	C27 H42 N4 O5	502.313	12.065	Full match	No results	No results	58385.7	117943	88807.4	99097.1	74040.9	62651.4	33994	58425.6	24813.4	20716.9	40797.3	34935.9	2.34424	1.22912	0.00103518	0.972222	1.15391
Com_3425_pos	Cyclo(L-alanyl-L-serylglycyl-L-leucyl-L-asparaginylglycyl-L-isoleucyl-L-phenylalanylglycyl)	C37 H56 N10 O11	816.41	12.034	Full match	No results	No results	281499	868496	1.09802e+06	1.13005e+06	1.10441e+06	605939	784666	2.52961e+06	1.36989e+06	646040	1.03056e+06	1.25384e+06	0.668244	-0.581552	0.205097	0.694444	0.528765
Com_342_pos	Tetraxetan	C16 H28 N4 O8	404.189	6.154	Full match	No results	No results	6471.51	6008.96	3175.77	5192.42	3820.01	3887.42	3358.96	3304.38	2441.98	3533.89	2696.52	2426.78	1.60766	0.684963	0.00964337	0.916667	0.596771
Com_3430_pos	Cyclo(D-isoleucyl-L-leucyl-L-prolyl-N-methyl-L-phenylalanyl-L-valyl)	C32 H49 N5 O5	583.371	10.763	Full match	No results	No results	104186	47963.4	47498.2	115796	122352	44659.5	186868	110319	114291	137615	31793.4	10878.5	0.815281	-0.294631	0.923472	0.555556	0.116309
Com_3431_pos	Cyclo(arginyltyrosylthreonylglycylvalyl-N-{1-[(1-carboxy-2-methylbutyl)amino]-3-methyl-1-oxo-2-pentanyl}asparaginylglycylphenylalanylglycylglutaminylhistidylseryl)	C69 H102 N20 O20	1530.75	13.614	Full match	No results	No results	564277	329993	370852	339597	440695	373064	319840	224309	252190	193859	128053	285378	1.72302	0.784936	0.00631664	1	0.754159
Com_3432_pos	Cyclo(alpha-aspartylprolylphenylalanylprolylphenylalanylprolylisoleucyltyrosyl)	C52 H64 N8 O11	976.473	10.767	Full match	No results	No results	1784.09	1490.81	1741.37	3655.03	1934.56	1658.65	2066.22	2057.3	1859.11	2352.98	1609.53	1754.34	1.04829	0.0680438	0.969377	0.638889	0.00744766
Com_3433_pos	Cyclic-3,20-bis(1,2-ethanediyl acetal)-11alpha-(acetyloxy)-5alpha,6alpha-epoxypregnane-3,20-dione	C27 H40 O7	476.276	11.538	Full match	Invalid mass	No results	372270	362897	324051	387399	369594	504880	113492	199837	190334	119158	125185	127254	2.65189	1.40702	2.83857e-05	1	1.30466
Com_3435_pos	Cyclamic acid	C6 H13 N O3 S	179.061	1.653	Full match	No results	No results	283703	302870	264084	189441	309377	283840	484570	423078	336264	464349	527970	346373	0.63243	-0.661023	0.00145203	1	0.602314
Com_3436_pos	cyasterone	C29 H44 O8	520.303	11.794	Full match	No results	No results	17245.1	20921.8	16992.7	18272.8	16295.2	21341.5	20995.4	19012.6	18460.2	18255.5	22106.7	19966.8	0.934948	-0.0970426	0.238819	0.722222	0.0982461
Com_3438_pos	cyanidin 3-O-rutinoside 5-O-beta-D-glucoside betaine	C33 H40 O20	756.21	7.954	Full match	No results	No results	138278	99308.5	100513	113339	103439	116176	76348.2	92797.9	45506.5	24305.6	52496.8	60678.5	1.90568	0.930307	0.0117612	1	0.948666
Com_343_pos	Tetraphenylphosphonium	C24 H20 P	339.131	7.469	Full match	No results	No results	19540.7	29565.2	22792.3	23614.9	23731.7	22311.9	17982.5	28285.8	23408.5	19589.9	26564.3	35053.2	0.938181	-0.0920621	0.697857	0.555556	0.0684836
Com_3443_pos	Curcumin	C21 H20 O6	368.125	9.06	Full match	No results	No results	1.63955e+06	1.26879e+06	2.29841e+06	2.23455e+06	2.69792e+06	2.35159e+06	3.31745e+06	2.16068e+06	2.13323e+06	3.83467e+06	1.59534e+06	1.89043e+06	0.836523	-0.257522	0.394639	0.472222	0.235543
Com_3445_pos	Curcumene	C15 H22	202.172	8.202	Full match	No results	No results	90968.6	79863.9	66318	54799.4	56078.7	74391.8	79405.6	50307.9	73366.1	6147.57	108116	95593.7	1.02297	0.0327578	0.534009	0.527778	0.431924
Com_3447_pos	Cuminaldehyde	C10 H12 O	148.089	12.57	Not the top hit	Full match	No results	4.42124e+06	4.85481e+06	5.40017e+06	4.84637e+06	4.11613e+06	5.55225e+06	1.98578e+06	4.86019e+06	4.62135e+06	3.5341e+06	3.96287e+06	4.19508e+06	1.26044	0.333926	0.108386	0.805556	0.348324
Com_3452_pos	Cucurbitacin S	C30 H42 O6	498.298	12.973	Full match	No results	No results	16235.1	15502.6	8593.24	14122.8	12593.2	15003.7	22892.6	25168.8	16103.1	14010.2	15298.5	22528.7	0.70732	-0.499564	0.0344992	0.805556	0.454388
Com_3453_pos	CUCURBITACIN P	C30 H48 O7	520.34	15.176	Full match	No results	No results	945019	683822	942830	785261	793823	715501	495263	252649	452910	339781	289450	341598	2.24081	1.16402	0.0001501	1	1.09288
Com_3456_pos	Cucurbitacin E	C32 H44 O8	556.303	11.238	Full match	No results	No results	11623.8	11985.1	15189.5	11183.3	10540.3	14856.5	12347.5	11345.8	8443.51	6732.58	4605.09	6413.26	1.51096	0.595468	0.0282851	0.833333	0.613513
Com_3457_pos	CUCURBITACIN C	C32 H48 O8	560.334	13.284	Full match	No results	No results	138523	135919	144522	165529	114075	155384	147767	177774	175856	146737	171625	153194	0.877691	-0.188215	0.0657722	0.833333	0.179559
Com_3460_pos	cucurbitacin B	C32 H46 O8	558.32	12.647	Full match	No results	No results	47113.8	64546.3	63090.4	63815.7	49339.3	65074.1	47480.9	47906.3	54476.4	39272.6	27626.5	35684.2	1.39823	0.483605	0.016958	0.888889	0.470076
Com_3461_pos	Cucurbitacin A	C32 H46 O9	574.313	11.25	Full match	No results	No results	119962	91037.8	136487	98798.2	113703	114964	131436	95848.9	101721	100905	68234.9	70090.1	1.1878	0.248297	0.1459	0.722222	0.264397
Com_3465_pos	Cuauhtemone	C15 H24 O3	252.172	9.603	Full match	No results	No results	87648	68916.1	80356	82888.6	85440	80141.8	103983	92591.2	84418.2	97029.5	75212.4	71941.4	0.924244	-0.113655	0.319199	0.666667	0.09732
Com_3466_pos	Cryptoxanthin	C40 H56 O	552.433	13.178	Full match	No results	No results	2.60716e+06	2.38758e+06	2.43546e+06	2.5057e+06	2.03129e+06	2.25475e+06	2.32793e+06	2.12748e+06	2.20428e+06	2.32642e+06	2.27209e+06	2.47623e+06	1.0355	0.0503207	0.456261	0.666667	0.0431258
Com_3467_pos	crufomate	C12 H19 Cl N O3 P	291.079	8.087	Full match	No results	No results	114194	110225	95505.6	146549	81357	139206	127125	198352	177063	155172	120225	114611	0.769748	-0.377542	0.0703998	0.833333	0.344425
Com_3469_pos	crucigasterin B	C14 H27 N O	225.209	15.345	Full match	Invalid mass	No results	57824.3	157648	62883.5	96598.6	75105.1	69561.5	225239	148954	133062	136535	175356	81307.6	0.577065	-0.793193	0.0198831	0.861111	0.748678
Com_3471_pos	crucigasterin A	C14 H25 N O	223.193	14.615	Full match	Invalid mass	No results	1.24291e+06	1.64304e+06	1.29296e+06	1.22887e+06	1.2043e+06	1.74046e+06	1.53072e+06	1.32639e+06	1.17507e+06	1.81097e+06	2.09655e+06	1.15781e+06	0.918113	-0.123257	0.557309	0.555556	0.112805
Com_3472_pos	crotonolide A	C20 H18 O6	354.109	9.673	Full match	No results	No results	291891	225899	308343	304373	323097	288608	410896	304594	259486	355860	222509	249238	0.966509	-0.0491453	0.875543	0.5	0.0606741
Com_3473_pos	Crotanecine	C8 H13 N O3	171.089	1.345	Full match	No results	No results	885889	787353	1.02434e+06	673093	1.2345e+06	949699	940584	1.02491e+06	586420	743867	757827	685558	1.17212	0.229122	0.21732	0.694444	0.207861
Com_3474_pos	crassumtocopherol A	C29 H50 O5	478.365	11.274	Full match	No results	No results	33364.1	36852.4	30826.1	22020.7	33542.7	28924.9	23293.5	17044.5	17902.4	17318.2	8901.03	15918.4	1.84832	0.886215	0.00276399	0.972222	0.854892
Com_3476_pos	coumatetralyl	C19 H16 O3	292.109	8.787	Full match	No results	No results	6231.23	3842.33	5265.36	3880.51	4463.6	3348.5	31740.5	4881.93	7676.22	5810.71	4083.53	3975.32	0.464713	-1.10559	0.22215	0.75	0.612303
Com_3482_pos	Coumarone	C8 H6 O	118.042	6.345	Full match	Invalid mass	No results	288444	379018	497318	759976	470447	453338	467510	685068	678073	905188	819661	605175	0.684634	-0.546595	0.0347511	0.833333	0.527904
Com_3486_pos	Coumarin	C9 H6 O2	146.037	6.343	Full match	Full match	Full match	1.3732e+06	1.59115e+06	2.38733e+06	3.29016e+06	2.04094e+06	2.27908e+06	2.12231e+06	3.00654e+06	2.80059e+06	4.2202e+06	3.66903e+06	2.79041e+06	0.696534	-0.521735	0.0412756	0.833333	0.498356
Com_3494_pos	Cortisone	C21 H28 O5	360.193	12.296	Full match	No results	No results	82929.8	75111	103447	72378.4	72562.9	99670.5	44000.7	73827.7	75546	46381.5	66164.1	71025.4	1.34263	0.425065	0.0301917	0.861111	0.403323
Com_3497_pos	Corticosterone	C21 H30 O4	346.213	12.383	Full match	No results	No results	20677.2	30472.1	37640.5	27707.8	19704.7	25413.4	16924.5	25217.7	21347.9	13724.8	24914.3	17709.3	1.34861	0.431476	0.0584129	0.833333	0.39183
Com_3499_pos	Correolide	C40 H52 O16	788.325	10.892	Full match	No results	No results	5.52844e+06	4.30139e+06	4.1867e+06	698482	5.51862e+06	2.63253e+06	3.74481e+06	4.08224e+06	4.79855e+06	5.55933e+06	5.63317e+06	7.80447e+06	0.723096	-0.467741	0.206792	0.722222	0.633293
Com_34_pos	Zeatin-7-N-glucoside	C16 H23 N5 O6	381.164	6.593	Full match	Full match	No results	549358	555191	529884	678238	595816	639883	631604	344089	526490	627806	506663	513885	1.12627	0.171559	0.216622	0.777778	0.179706
Com_3500_pos	Corphos	C21 H31 O8 P	442.177	8.657	Full match	Invalid mass	No results	359366	572615	839238	878981	624459	489378	624031	739338	610536	371439	408910	799128	1.05928	0.0830878	0.79178	0.444444	0.100472
Com_3502_pos	Convallatoxin	C29 H42 O10	550.277	12.254	Full match	No results	No results	414876	717432	971390	553710	789754	550836	2.03399e+06	2.97372e+06	3.52686e+06	2.4328e+06	1.41697e+06	3.67494e+06	0.248953	-2.00606	3.78976e-05	1	1.81403
Com_3505_pos	Coniferol	C10 H12 O3	180.078	8.533	Full match	Invalid mass	No results	450012	567930	621018	547063	622418	564911	796345	459971	502491	644514	440869	553510	0.992834	-0.0103756	0.933967	0.555556	0.0871864
Com_3506_pos	Compound II(R/S)	C21 H27 Cl N2 O3	390.171	7.492	Full match	No results	No results	31316.4	35838	53989	53739.5	46820.1	43306.4	65052.7	31123	75408	40802.2	31855.6	56856.2	0.880144	-0.184188	0.628893	0.583333	0.187323
Com_3507_pos	compound 30 [PMID: 16455256]	C26 H28 N4 O4 S	492.183	8.829	Full match	No results	No results	5085.71	4772.35	4330.08	3377.72	7454.46	5897.65	3803.87	3070.53	3037.23	3695.83	3116.12	2192.78	1.63446	0.70881	0.00661001	0.944444	0.626868
Com_3508_pos	Combretastatin A-4	C18 H20 O5	316.13	8.79	Full match	No results	No results	110346	102410	139305	94826.4	97025.8	103906	110189	84525.8	80674.2	58522.7	41020.9	53423.8	1.51234	0.596781	0.0247104	0.888889	0.615033
Com_3509_pos	Combretastatin A-1	C18 H20 O6	332.125	8.344	Full match	No results	No results	15335.9	10906	44048.4	49966.6	39983.9	39256.4	18494.5	17706.7	15768.1	18108.5	13752.5	11253.8	2.09811	1.06909	0.0650642	0.722222	0.812036
Com_350_pos	Tetrahydrothiophene	C4 H8 S	88.0343	0.56	Full match	No results	No results	11838.7	8392.32	11234.9	9088.99	8581.13	10649.1	15833	12715.9	12930.1	19086.2	18247.2	13230.4	0.649537	-0.622516	0.00130832	1	0.561725
Com_3511_pos	codeinone	C18 H19 N O3	297.136	11.08	Full match	No results	No results	118068	56926.1	53971.2	51459.1	53491.8	55211.2	7583.42	8931.39	6594.95	9785.28	12164.9	5462.27	7.7021	2.94525	4.65757e-07	1	2.66219
Com_3512_pos	Codeine-6-glucuronide	C24 H29 N O9	475.183	8.392	Full match	No results	No results	94505.1	41506.9	38965.6	42410.9	65948	68487.4	34508	31805.4	36525.1	55050.7	49610.6	47527.8	1.37955	0.4642	0.131382	0.75	0.3812
Com_3517_pos	Cloxazolam	C17 H14 Cl2 N2 O2	348.043	1.18	Full match	No results	No results	51132.7	20248.3	49655.8	43609.1	52722.8	44126.8	53942.7	45141.4	48179.8	60349	75643	49363	0.786172	-0.347084	0.145396	0.75	0.359432
Com_3519_pos	Clotrimazole	C22 H17 Cl N2	344.107	8.214	Full match	No results	No results	241563	158566	173768	193842	177538	221503	351920	322164	389839	434054	133472	201209	0.636659	-0.651406	0.0951478	0.777778	0.519857
Com_3522_pos	clofenamide	C6 H7 Cl N2 O4 S2	269.954	1.167	Full match	No results	No results	99986.9	118274	117866	146390	102499	131968	43863.2	62461.6	29035.3	51198.9	31684.3	32225.3	2.86257	1.51731	9.60959e-05	1	1.42374
Com_3525_pos	Clobenpropit	C14 H17 Cl N4 S	308.086	7.039	Full match	No results	No results	107361	44066.6	36592.4	20311.2	117462	39325.6	30828.1	25187.3	28163.5	27977	23046.5	20800.7	2.34046	1.22679	0.0600914	0.833333	0.88082
Com_3526_pos	clindamycin-2-phosphate	C18 H34 Cl N2 O8 P S	504.147	12.244	Full match	No results	No results	117690	175929	186943	155687	201945	193156	873616	802992	788446	611271	415873	776584	0.241603	-2.04929	2.9822e-06	1	1.85024
Com_352_pos	Tetrahydropapaveroline	C16 H17 N O4	287.115	8.708	Full match	No results	No results	11969.4	14010.1	16683.5	17802.4	15051.3	18999.1	25875.8	25450	11106.4	16784	18807.4	19136.5	0.806723	-0.309855	0.22962	0.75	0.251962
Com_3530_pos	Clavamycin F	C15 H24 N4 O7	372.163	5.948	Full match	No results	No results	5550.35	5745.77	5849.89	6737.15	7649.07	5128.77	1793.6	1740.79	1676.11	1756.34	1794.21	2230.02	3.33552	1.73791	4.89996e-08	1	1.57811
Com_3531_pos	Clavamycin B	C13 H22 N4 O8	362.143	1.324	Full match	No results	No results	55351.2	38790.7	37763.7	49320.1	35741.7	42890.2	21980	24005.2	20998.3	27299.8	21753.4	31711.4	1.75879	0.814581	0.000150246	1	0.740383
Com_3533_pos	clathridimine	C16 H16 N6 O3	340.129	6.42	Full match	Invalid mass	No results	108893	48790.6	50333.9	71000	68494	134452	85709.9	37749.9	53029.2	75182.2	157242	68995.3	1.00849	0.0121897	0.888342	0.527778	0.17448
Com_3534_pos	cladosin A	C14 H22 N2 O4	282.157	5.984	Full match	No results	No results	489420	231453	317367	298512	323251	281212	339422	177113	295641	320751	101966	111119	1.4422	0.528268	0.105237	0.694444	0.61832
Com_3535_pos	Citric acid	C6 H8 O7	192.027	1.666	Full match	Invalid mass	No results	2.15792e+07	2.4971e+07	2.3214e+07	3.25278e+07	3.01467e+07	4.55311e+07	9.55841e+06	2.29445e+07	2.21114e+07	9.92999e+06	1.01593e+07	1.22124e+07	2.0476	1.03394	0.00461511	0.944444	0.994105
Com_3536_pos	Citral	C10 H16 O	152.12	10.416	Not the top hit	Full match	No results	9.53303e+06	6.60519e+06	5.67102e+06	6.24464e+06	7.08922e+06	6.84723e+06	1.76875e+06	3.18315e+06	1.97061e+06	1.50262e+06	1.62629e+06	1.75618e+06	3.55621	1.83034	5.43664e-06	1	1.6928
Com_3539_pos	cis-trihomoaconitic acid	C9 H12 O6	216.063	12.575	Full match	Invalid mass	No results	24913.3	29336.5	29421.6	32476.6	26281.3	18311.3	26178.2	23386.1	14224.8	16638	26793.1	25987.8	1.20669	0.271053	0.178609	0.777778	0.267941
Com_3540_pos	cis-Stilbene	C14 H12	180.094	13.133	Full match	Invalid mass	No results	4.12531e+06	3.8658e+06	4.15432e+06	3.1605e+06	4.01375e+06	2.95501e+06	4.28347e+06	4.67926e+06	4.22524e+06	3.99424e+06	4.1862e+06	4.30578e+06	0.867591	-0.204913	0.0561395	0.916667	0.196852
Com_3541_pos	cis-Resveratrol	C14 H12 O3	228.078	8.31	Full match	Full match	No results	133381	170465	276120	230759	213245	142657	358579	350474	454138	242345	125950	243025	0.657436	-0.605078	0.120525	0.777778	0.525803
Com_3542_pos	cis-dihomoaconitic acid	C8 H10 O6	202.047	12.247	Full match	Invalid mass	No results	23154.4	25793.8	32964.2	38783.5	18255.8	34783.4	79512.2	103218	81993.9	78907.2	57762.6	106833	0.341846	-1.54858	3.30235e-05	1	1.42711
Com_3543_pos	cis-Cycothiamine	C13 H16 N4 O3 S	308.093	8.894	Full match	No results	No results	61502.3	29402.5	35850.6	21625.5	29339.6	39778.2	99668.5	21748.7	56198.8	142688	62331.7	76404.4	0.473812	-1.07761	0.0607087	0.833333	0.863816
Com_3544_pos	cis-Cyclooctene	C8 H14	110.109	14.574	Full match	No results	No results	27098	19537.5	20771.2	25091.5	22797.6	26388.1	21515.8	19726.8	20287.1	34843.9	40269.4	30567.2	0.847339	-0.238988	0.362633	0.611111	0.194657
Com_3547_pos	ciprocinonide	C28 H34 F2 O7	520.23	11.33	Full match	No results	No results	27770.1	13222.1	9831.17	15882.1	33296.5	20574	11596.5	9577.78	10090.6	9839.08	9307.39	9611.1	2.00885	1.00637	0.0215498	0.916667	0.807252
Com_3548_pos	cinromide	C11 H12 Br N O	253.011	1.178	Full match	No results	No results	21310.9	21036.5	22413.7	27680.9	19873.3	21265.6	26526.6	39578.2	23289.9	31435.6	29279	36799.2	0.714687	-0.484617	0.00847129	0.944444	0.430063
Com_3549_pos	Cinobufagin	C26 H34 O6	442.235	10.629	Full match	No results	No results	10590.5	11481.7	20294.2	9671.03	9203.92	10132.5	27872.8	15081.4	17283.8	15121.5	11111.3	11465.6	0.728776	-0.456452	0.122067	0.805556	0.421528
Com_354_pos	Tetrahydrofolic acid	C19 H23 N7 O6	445.173	7.579	Full match	No results	No results	246276	138904	128542	88392.7	151099	87165.7	90672.3	311841	123606	81786.7	385067	307117	0.6464	-0.629501	0.360138	0.611111	0.481782
Com_3555_pos	Cinnamyl alcohol	C9 H10 O	134.073	9.126	Full match	No results	No results	195296	156951	160440	153994	177976	155507	253512	158544	179966	222707	177509	162807	0.865911	-0.20771	0.160041	0.777778	0.176195
Com_3558_pos	Cinnamtannin B1	C45 H36 O18	864.191	8.836	Full match	No results	No results	32567.5	36460.8	48013.6	39183	31354.9	39073.7	50860.4	46867.4	55771.6	64438.5	75872.8	68303	0.625918	-0.675955	0.000864475	0.972222	0.610625
Com_3559_pos	cinnamodial	C17 H24 O5	308.161	13.154	Full match	No results	No results	40987.8	39044.9	34213	46588.9	51754.9	46799.2	42091.4	36431.8	40213.3	35106.8	38994.4	34644.8	1.14026	0.18936	0.110282	0.75	0.164813
Com_3567_pos	Cinalukast	C23 H28 N2 O3 S	412.184	5.949	Full match	No results	No results	5317.47	3591.49	12965.2	10308.3	7484.55	9058.08	5690.91	4396.27	4232.94	4441.9	5720.52	5664.38	1.61626	0.692656	0.0900506	0.75	0.533484
Com_3570_pos	cifostodine	C9 H12 N3 O7 P	305.04	1.317	Full match	No results	No results	2.33615e+06	2.25499e+06	2.09917e+06	3.33852e+06	2.90671e+06	3.21759e+06	329596	413987	278535	357677	931434	505179	5.73537	2.51989	3.04407e-05	1	2.38945
Com_3571_pos	Cicutoxin	C17 H22 O2	258.161	12.963	Full match	No results	No results	958682	366132	373340	352349	352306	890723	1.2054e+06	1.38025e+06	321264	388488	394142	464377	0.792874	-0.334837	0.632837	0.666667	0.234021
Com_3574_pos	Ciclopirox	C12 H17 N O2	207.126	7.778	Full match	No results	No results	604526	479358	250412	259175	362877	260363	74121.1	353272	31730.4	85153.4	163370	212350	2.40948	1.26872	0.0247802	0.916667	1.45712
Com_3576_pos	Ciclesonide	C32 H44 O7	540.308	13.101	Full match	Invalid mass	No results	2.26694e+07	2.18674e+07	1.68976e+07	2.74682e+07	2.13284e+07	2.81114e+07	2.50855e+07	2.44089e+07	3.10493e+07	2.50588e+07	1.6898e+07	2.12414e+07	0.962436	-0.055238	0.757311	0.555556	0.0538313
Com_3578_pos	Chorismic acid	C10 H10 O6	226.047	12.251	Full match	No results	No results	219623	267344	337604	259132	330328	259664	675338	886678	819945	675851	544264	812296	0.379147	-1.39917	2.0983e-06	1	1.2726
Com_3579_pos	Choline	C5 H13 N O	103.099	1.169	No results	Full match	No results	3.21542e+08	2.20138e+08	3.2655e+08	2.63506e+08	2.99436e+08	3.25301e+08	2.52484e+08	2.7371e+08	2.28336e+08	1.90008e+08	2.91687e+08	2.34753e+08	1.19408	0.255904	0.0755586	0.805556	0.235669
Com_3582_pos	cholesteryl beta-D-glucoside	C33 H56 O6	548.407	15.001	Full match	Invalid mass	No results	603331	632510	843898	974156	842959	772417	722481	1.08734e+06	930803	1.06457e+06	904721	1.0125e+06	0.815962	-0.293427	0.0585753	0.833333	0.273808
Com_3583_pos	Chlorphentermine	C10 H14 Cl N	183.082	6.579	Full match	No results	No results	106271	91716.3	95326.6	118611	101494	118974	87696	98277	93725.8	87270.5	102931	107618	1.09502	0.130954	0.148568	0.722222	0.122147
Com_3584_pos	chloropropylate	C17 H16 Cl2 O3	338.047	7.78	Full match	Invalid mass	No results	60695.3	73801.9	68730.4	81662.7	58713.8	57007.4	65844.8	50759	48926.9	53078.9	41583.6	66203.1	1.22738	0.295579	0.0507537	0.833333	0.281627
Com_3585_pos	CHLOROHYDROASPYRONE A	C9 H13 Cl O4	220.049	8.023	Full match	No results	No results	12548.2	11122.7	11846.5	11744	11716.7	12945.3	13480.6	12336.2	12835.3	13115.8	12698.7	12758	0.931353	-0.1026	0.0222284	0.861111	0.0945748
Com_3587_pos	Chlorogenic acid	C16 H18 O9	354.094	7.151	Full match	Full match	Full match	110763	93353.7	145133	109067	112204	111366	385166	200319	311266	1.55875e+06	339904	249050	0.223977	-2.15858	0.00838297	1	1.61134
Com_3589_pos	chlorocylindrocarpol	C23 H33 Cl O5	424.203	11.459	Full match	No results	No results	5072.71	5612.98	3355.59	4783.01	3885.15	2525.19	4193.5	3754.36	5718.19	1985.68	2207.05	2735.41	1.22533	0.293168	0.278009	0.666667	0.315477
Com_358_pos	Tetrahydrocortisone	C21 H32 O5	364.224	11.192	Full match	No results	No results	209103	260212	529841	362380	406351	302302	134739	120372	245458	145542	76898.5	99144.8	2.518	1.33228	0.00121567	0.972222	1.2641
Com_35_pos	Zearalenone	C18 H22 O5	318.146	10.56	Full match	No results	No results	58079.9	53660.6	56021.1	39284.1	57670.3	48529.3	75235.3	161912	81959.5	55341.7	49682.6	62300.4	0.643966	-0.634943	0.0922026	0.805556	0.479078
Com_3600_pos	Chlormequat	C5 H12 Cl N	121.065	9.942	No results	Invalid mass	No results	466220	427293	578335	530840	301845	262408	642432	151841	314784	498511	148695	253284	1.27737	0.35318	0.239209	0.666667	0.522127
Com_3601_pos	Chlorhexidine	C22 H30 Cl2 N10	504.204	11.557	Full match	No results	No results	8178.66	6194.65	5433.22	4073.6	6445.11	4880.77	5085.4	5676.15	5138.88	3884.49	6602.18	7081	1.05193	0.0730351	0.740332	0.527778	0.07778
Com_3603_pos	Chloramphenicol palmitate	C27 H42 Cl2 N2 O6	560.243	1.317	Full match	No results	No results	80217.1	98590.7	126220	110861	147156	133023	160061	149606	203351	163566	269473	259051	0.577597	-0.791864	0.00299377	1	0.711654
Com_3605_pos	chitobiose, di-N-acetyl	C16 H28 N2 O11	424.17	8.499	Full match	No results	No results	2.29236e+06	2.02369e+06	1.96514e+06	1.76426e+06	1.91663e+06	1.63731e+06	4.10789e+06	2.38154e+06	2.79541e+06	2.64073e+06	1.43184e+06	1.82162e+06	0.764172	-0.388032	0.209376	0.722222	0.305544
Com_3606_pos	chavicol	C9 H10 O	134.073	9.707	Full match	Invalid mass	No results	322018	281808	363797	413063	325743	257691	570141	163476	424792	549374	192671	259224	0.90945	-0.136934	0.971153	0.527778	0.18711
Com_3612_pos	Chaksine	C22 H38 N6 O4	450.297	14.718	Full match	No results	No results	63881.2	95134.9	107340	106406	106225	80098.9	170282	221520	168672	152009	91696.8	127156	0.600307	-0.736228	0.00951045	0.888889	0.650431
Com_3614_pos	chaetomugilin G	C24 H29 Cl O7	464.159	8.661	Full match	No results	No results	152078	247461	423106	387165	296503	263601	327104	330994	289293	173709	178582	346482	1.07518	0.104572	0.76924	0.472222	0.129555
Com_3616_pos	chaetominedione	C17 H12 N2 O4	308.081	1.435	Full match	Invalid mass	No results	15605.9	16570.9	17459.8	16672.8	19121.3	18791.1	111218	51387	82271.4	84345.3	49744	47482	0.244396	-2.03271	0.00015785	1	1.78568
Com_3617_pos	chabrolonaphthoquinone A	C27 H32 O4	420.231	14.2	Full match	No results	No results	13082.9	7123.82	16340.2	10076.1	8572.47	13695.1	8710.55	11782.2	15155.7	9746.96	10208	15985.7	0.962307	-0.0554302	0.752674	0.444444	0.0810555
Com_3618_pos	cGMP	C10 H12 N5 O7 P	345.047	1.806	Full match	Invalid mass	No results	510555	524041	452294	996229	622726	836107	17286.1	20933.3	12527.1	14604.3	98416.5	12743.2	22.3327	4.48108	3.62668e-05	1	4.48323
Com_3619_pos	cetoniacytone A	C9 H11 N O5	213.063	1.327	Full match	No results	No results	1.08251e+06	1.6709e+06	1.96544e+06	2.32198e+06	1.49199e+06	1.50453e+06	1.5337e+06	1.87864e+06	2.1295e+06	1.7249e+06	2.58918e+06	1.90163e+06	0.853694	-0.228209	0.217252	0.722222	0.229728
Com_361_pos	tetrahydrocortisol	C21 H34 O5	366.24	11.549	Full match	No results	No results	49822.3	48206.8	70522	63217.8	55450.4	60417.4	47704.1	40243.4	41866.6	28933.1	28623.6	44621.9	1.49848	0.583502	0.00427523	1	0.551412
Com_3620_pos	Cetiedil	C20 H31 N O2 S	349.209	10.571	Full match	No results	No results	1.05568e+06	822941	852851	897317	805819	907074	181730	249926	235882	115602	154889	156251	4.88146	2.28731	1.10109e-05	1	2.12349
Com_3621_pos	CERATODICTYOL A	C19 H36 O4	328.26	14.17	Full match	No results	No results	61294.2	88921.4	109460	229825	100052	118970	23154.5	40783	30456.3	22786.7	34933.6	36390.5	3.75865	1.91021	0.000276191	1	1.66031
Com_3623_pos	Cephaeline	C28 H38 N2 O4	466.284	12.075	Full match	No results	No results	219581	298585	383497	387871	356985	230916	310450	298431	334980	129139	140516	247094	1.28538	0.362191	0.181081	0.722222	0.400268
Com_3624_pos	Cephabacin F3	C32 H51 N11 O13 S	829.341	12.746	Full match	No results	No results	396563	469416	410044	416057	368293	214169	164964	108652	150846	131548	85416.5	326035	2.35104	1.2333	0.00272477	0.972222	1.22407
Com_3626_pos	Cenicriviroc	C41 H52 N4 O4 S	696.368	12.937	Full match	No results	No results	406037	333230	441781	366849	266188	703999	760432	892286	1.1627e+06	2.27034e+06	2.09796e+06	1.40801e+06	0.293082	-1.77062	0.000461622	1	1.57162
Com_3627_pos	Cefquinome	C23 H24 N6 O5 S2	528.126	8.108	Full match	No results	No results	7244.04	10703.9	7719.36	5997.01	7924.54	6686.24	8445.39	6396.68	7293.63	6792.09	6610.93	6435.04	1.10248	0.140749	0.377554	0.638889	0.12055
Com_3629_pos	Cefepime	C19 H24 N6 O5 S2	480.124	7.802	Full match	No results	No results	95189.4	56699	98270.8	108163	159707	95645.2	120458	62353.8	109286	100663	43644.4	118054	1.1068	0.146393	0.591456	0.555556	0.238082
Com_3630_pos	catunaregin	C16 H20 O5	292.13	12.86	Full match	Invalid mass	No results	378342	274519	264986	343993	381887	330241	216743	263740	184335	256034	181534	186830	1.53114	0.614605	0.00108209	1	0.562593
Com_3631_pos	Catheduline E2	C38 H40 N2 O11	700.26	10.77	Full match	No results	No results	35858.5	14843.6	9905.52	12253.9	19014.6	19503	7330.2	8240.03	8425.1	6993.57	6185.83	7222.39	2.5087	1.32694	0.00516127	1	1.09853
Com_3639_pos	catechol	C6 H6 O2	110.037	13.915	Full match	Invalid mass	No results	1.14711e+07	1.3781e+07	1.76523e+07	1.14545e+07	1.39852e+07	8.32045e+06	8.3102e+06	1.23319e+07	1.11744e+07	8.86711e+06	6.78871e+06	1.74395e+07	1.18106	0.240079	0.299414	0.722222	0.273949
Com_363_pos	tetrahydrobostrycin	C16 H20 O8	340.115	8.167	Full match	Invalid mass	No results	34408.5	18733.4	20526.9	21888.6	22117.5	29918.6	53661.8	37553.3	20872.9	48416.8	26756.4	16447.2	0.724533	-0.464876	0.270353	0.666667	0.339146
Com_3643_pos	casuarine	C8 H15 N O5	205.095	1.547	Full match	Invalid mass	No results	8.59788e+06	1.02054e+07	9.8476e+06	1.59429e+07	1.11531e+07	9.25159e+06	6.94923e+06	7.13997e+06	1.0299e+07	6.54606e+06	5.83155e+06	7.24933e+06	1.47673	0.562406	0.00898229	0.888889	0.508234
Com_3648_pos	Cassyfiline	C19 H19 N O5	341.126	8.752	Full match	No results	No results	66987.1	47614.6	44642.1	35585.9	57543.7	52882.6	59497.4	126231	41270.6	35685.7	34041.2	91488.6	0.786307	-0.346836	0.59068	0.527778	0.176474
Com_3649_pos	Cassaidine	C24 H41 N O4	407.303	14.462	Full match	No results	No results	62622.8	100603	103978	132574	77888.3	99053.5	16680.8	18301	18777.8	18789.5	19839.9	18157	5.21701	2.38322	1.1555e-05	1	2.13782
Com_364_pos	Tetracycline	C22 H24 N2 O8	444.153	8.108	Full match	No results	No results	67591.5	61906.2	71824.9	75953.6	69406.8	61061.7	43304.4	57208.3	29229.3	21524.6	37798.9	68803.3	1.58121	0.661029	0.0283548	0.916667	0.695361
Com_3650_pos	Casimiroin	C12 H11 N O4	233.068	8.224	Full match	No results	No results	16994.9	12834.9	15090.2	14897.9	16115.1	12123.8	27798.4	13521.8	17345.6	13130.9	6997.97	9816.15	0.993748	-0.00904816	0.699367	0.555556	0.174329
Com_3652_pos	caseanigrescen A	C30 H42 O10	562.277	11.516	Full match	No results	No results	12503.2	11842.9	14879.3	12861.3	10256.9	10791.3	18263.8	12700.5	13955.8	16774.4	8005.67	9720.24	0.920857	-0.118951	0.734276	0.583333	0.130527
Com_3653_pos	Carzelesin	C41 H37 Cl N6 O5	728.249	12.788	Full match	No results	No results	142736	139225	115907	43780.7	142309	48407.6	41984.8	50115.7	39269.2	80591	50527.6	64513.2	1.93383	0.951459	0.0559622	0.777778	0.76522
Com_3654_pos	Carteolol	C16 H24 N2 O3	292.179	12.271	Full match	No results	No results	17617.8	19833	38567.7	30380.5	29225.1	22015.2	12590	27990.8	27688.2	17820.4	16118.7	34517.7	1.15296	0.205341	0.425441	0.666667	0.236677
Com_3656_pos	cartazolate	C15 H22 N4 O2	290.174	7.362	Full match	Invalid mass	No results	6360.74	6612.85	5546.49	6097.98	6010.01	6148.03	6807	6096	6294.27	7097.89	10048.7	6211.2	0.864201	-0.210561	0.153139	0.777778	0.188502
Com_3657_pos	carolacton	C25 H40 O8	468.271	13.283	Full match	No results	No results	208872	237884	229070	288201	112932	238784	33379	65682.4	50248.1	36017.6	104696	37343.9	4.01916	2.0069	0.000109582	1	1.89894
Com_3659_pos	Carlinoside	C26 H28 O15	580.142	7.375	Full match	Invalid mass	No results	229425	294709	342745	420520	325935	285553	403741	431446	350091	203131	121309	460253	0.963917	-0.0530197	0.851105	0.611111	0.155723
Com_365_pos	Tetracenomycin C	C23 H20 O11	472.103	10.552	Full match	No results	No results	85859.2	97113.8	85996.3	80663.2	56883.7	68731.6	111173	342941	193696	88488.8	70765.1	105143	0.520987	-0.94068	0.0859394	0.861111	0.672077
Com_3661_pos	carijodienone	C21 H28 O	296.213	13.079	Full match	Invalid mass	No results	3.05202e+06	2.88847e+06	3.03527e+06	3.02171e+06	2.86217e+06	2.93728e+06	3.37033e+06	3.24341e+06	2.95642e+06	2.98262e+06	4.71545e+06	3.0449e+06	0.87613	-0.190783	0.162786	0.805556	0.17259
Com_3663_pos	Carfilzomib	C40 H57 N5 O7	719.429	14.419	Full match	No results	No results	307050	291989	242296	284777	274345	376372	140080	181867	199165	216473	189678	207197	1.56623	0.647298	0.000425247	1	0.590148
Com_3664_pos	CARDANOL TRIENE	C21 H30 O	298.229	14.481	Full match	No results	No results	15870.3	21403.8	31759.3	38282.3	32584.4	21753.8	29898.6	19895.1	28706.7	34916	22313.3	29161.8	0.980365	-0.0286094	0.776587	0.5	0.11987
Com_3665_pos	Carboxy-PTIO	C14 H18 N2 O4	278.126	5.817	Full match	No results	No results	63155.9	75314.3	60963.7	98528	47165.1	65293.2	47663.7	39714.4	45535.1	48938.7	57048.7	66903.3	1.3421	0.424495	0.0483393	0.805556	0.372995
Com_3666_pos	carbocromen	C20 H27 N O5	361.188	9.14	Full match	No results	No results	22003.1	70056.7	35040.9	14156.9	13292.8	7090.79	295109	11120.6	13480.5	27773.5	7828.98	10088.7	0.442367	-1.17669	0.940449	0.583333	0.346303
Com_3667_pos	carbinoxamine	C16 H19 Cl N2 O	290.118	8.701	Full match	No results	No results	1572.89	1624.64	1943.17	2208.42	1399.86	1780.19	1713.4	1753.43	2029.67	1234.48	1170.94	1421.11	1.12937	0.175521	0.268459	0.666667	0.176866
Com_3669_pos	Carapanaubine	C23 H28 N2 O6	428.194	7.463	Full match	No results	No results	7551.8	12695.4	7675.67	9347.15	10349.5	8823.2	10775.5	11285.7	8952.48	8397.47	9377.13	9236.68	0.972732	-0.0398864	0.68664	0.611111	0.0540699
Com_366_pos	tetraacetylchitotetraose	C32 H54 N4 O21	830.324	8.682	Full match	No results	No results	903.655	797.175	843.853	779.717	827.456	849.948	930.738	862.753	861.699	902.749	871.098	862.555	0.945236	-0.0812535	0.0503921	0.861111	0.0749479
Com_3671_pos	capsanthin	C40 H56 O3	584.422	12.926	Full match	No results	No results	378786	336581	444969	298061	445993	332987	472659	436980	402696	485513	400348	366039	0.872533	-0.196719	0.111427	0.75	0.191663
Com_3673_pos	capsaicin	C18 H27 N O3	305.198	12.42	Full match	No results	No results	48241.7	44746.1	49636.8	48146.1	46361.2	47418.9	87372.6	68425.6	66986.5	46337.1	300171	63746.3	0.4495	-1.15361	0.0847151	0.861111	0.799284
Com_3675_pos	Capryloylglycine	C10 H19 N O3	201.136	1.406	Partial match	Full match	No results	898577	619520	394439	121333	471349	787136	88773.7	2.78035e+06	65038.8	511677	140822	372137	0.831656	-0.265942	0.438964	0.694444	0.691679
Com_3677_pos	caprylic acid	C8 H16 O2	144.115	8.645	Full match	Invalid mass	No results	3.83334e+06	2.88416e+06	3.22826e+06	3.65574e+06	3.45604e+06	3.15056e+06	3.38496e+06	1.92472e+06	3.89747e+06	2.28008e+06	1.26871e+06	2.20923e+06	1.35034	0.433328	0.0803409	0.75	0.498438
Com_367_pos	testosterone ketolaurate	C31 H48 O4	484.355	14.834	Full match	No results	No results	15044.8	9673.13	18794.8	9133.67	19951	13996.8	6307.16	14845.2	10409.8	10910.1	9360.49	10821.9	1.38208	0.466846	0.107035	0.722222	0.411511
Com_3682_pos	Caprolactam	C6 H11 N O	113.084	14.896	Full match	Full match	No results	975067	1.54172e+06	897280	890815	941059	753724	1.04274e+06	651049	995675	1.09309e+06	1.2281e+06	817563	1.02942	0.0418263	0.868305	0.583333	0.0305551
Com_3690_pos	Capillone	C12 H12 O	172.089	13.11	Full match	Invalid mass	No results	7.60875e+06	8.33712e+06	7.84096e+06	7.77241e+06	6.97966e+06	7.56712e+06	7.79874e+06	7.99827e+06	7.30485e+06	7.04535e+06	7.76969e+06	7.17328e+06	1.02253	0.0321418	0.504139	0.583333	0.0315264
Com_3691_pos	capillene	C12 H10	154.078	13.093	Full match	Invalid mass	No results	9.2781e+06	8.91879e+06	7.76334e+06	9.2385e+06	8.67582e+06	9.12026e+06	9.35876e+06	9.82242e+06	9.31149e+06	8.76663e+06	9.29968e+06	9.23663e+06	0.949803	-0.0743001	0.129965	0.833333	0.0742363
Com_3693_pos	Canthaxanthin	C40 H52 O2	564.395	14.827	Full match	No results	No results	13725.3	9122.63	7488.47	7612.16	7931.19	8228.06	62573.2	55535.4	53145.7	53059.6	78255.3	38842.7	0.158482	-2.65761	7.04281e-08	1	2.42963
Com_3695_pos	Cannabioxepane	C21 H22 O2	306.161	6.74	Full match	No results	No results	1.10501e+06	833735	1.01759e+06	839461	1.02644e+06	1.07211e+06	1.0249e+06	638929	778601	999399	373532	535762	1.35467	0.437943	0.0758556	0.861111	0.493448
Com_3696_pos	Cannabinol monomethyl ether	C22 H28 O2	324.208	13.068	Partial match	Full match	No results	8.5611e+06	7.64518e+06	8.51219e+06	8.67356e+06	8.71117e+06	9.36121e+06	7.95798e+06	9.51509e+06	7.62106e+06	8.53085e+06	8.88627e+06	1.00157e+07	0.979772	-0.0294826	0.73315	0.555556	0.0317231
Com_3698_pos	Cannabinol	C21 H26 O2	310.192	13.109	Full match	No results	No results	4.87267e+06	4.30156e+06	4.20902e+06	4.2623e+06	4.16905e+06	4.30162e+06	4.07973e+06	4.18333e+06	4.42447e+06	3.88895e+06	4.34631e+06	4.16769e+06	1.04088	0.0578066	0.218168	0.694444	0.054024
Com_3699_pos	calyxamine A	C12 H21 N O	195.162	14.618	Full match	Invalid mass	No results	738010	802754	838160	890828	773109	1.04761e+06	856703	681167	691735	708740	1.14887e+06	728311	1.0571	0.0801066	0.507599	0.722222	0.109526
Com_369_pos	Testosterone glucuronide	C25 H36 O8	464.24	11.127	Full match	No results	No results	21114.5	10404.4	9835.78	13471.5	11460.8	15027.2	3264.06	3535.63	2030.76	2877.82	1615.33	1580.61	5.45579	2.44779	4.7495e-06	1	2.25185
Com_3700_pos	Calotropin	C29 H40 O9	532.267	12.503	Full match	No results	No results	215243	306099	331618	334752	311877	241581	894210	1.24376e+06	1.54747e+06	727726	508804	786560	0.305012	-1.71306	0.000369834	1	1.49379
Com_3703_pos	Calocarpin	C20 H20 O4	324.135	8.715	Partial match	Full match	No results	59468.4	51116.2	29306.7	21781.2	43139.1	1827.38	45700.2	62079.9	30635.7	84806.5	16753.2	20367.6	0.793717	-0.333303	0.45377	0.583333	0.63271
Com_3704_pos	callophycoic acid A	C27 H35 Br O3	486.176	10.751	Full match	No results	No results	55323.9	55000	62700.2	78497.8	54668.3	60735.2	14794.5	26638.4	10672.9	11066.8	12951.3	15314.3	4.01283	2.00462	3.4202e-05	1	1.88171
Com_3705_pos	Callichiline	C42 H48 N4 O5	688.363	12.252	Full match	No results	No results	5263.26	4096.76	4901.95	4460.43	4673.44	7602.37	7746.35	9632.73	9770.92	7468.19	6853.98	8832.72	0.616206	-0.698515	0.00128181	0.944444	0.652612
Com_3707_pos	Calenduloside E	C36 H56 O9	632.389	14.196	Full match	No results	No results	16975.2	15545.7	16501.8	21757.2	17332.5	16943.5	7961.04	11825.6	14611	14874.3	14202.4	11922.8	1.39337	0.478576	0.0135707	1	0.45653
Com_3708_pos	Caffeic acid phenethyl ester	C17 H16 O4	284.104	8.926	Full match	No results	No results	151089	179390	133103	138880	115557	117167	152716	196650	163989	178880	115872	125302	0.894771	-0.16041	0.349194	0.666667	0.141482
Com_3709_pos	Caffeic acid	C9 H8 O4	180.042	6.35	Full match	Full match	No results	285647	213198	282303	259266	254746	263677	1.02857e+06	297638	402733	1.81624e+06	573130	373884	0.34701	-1.52695	0.029766	1	1.1136
Com_3711_pos	Cafestol	C20 H28 O3	316.203	11.884	Full match	Full match	No results	4.16466e+06	1.96532e+06	2.37357e+06	1.22197e+06	2.21575e+06	1.86945e+06	3.74896e+06	2.65996e+06	1.62537e+06	2.55985e+06	3.73913e+06	2.85176e+06	0.803648	-0.315364	0.252681	0.722222	0.338064
Com_3714_pos	cadiolide I	C25 H12 Br6 O7	897.567	12.852	Full match	No results	No results	421343	250221	310646	185852	299831	180107	351473	420807	267725	437143	274392	439644	0.752105	-0.410994	0.0913717	0.777778	0.406612
Com_3720_pos	C-75	C14 H22 O4	254.152	14.518	Full match	No results	No results	46823.4	39506.2	48591.3	51042.8	40187.5	57693.8	42324.9	42436.9	51288.7	36030.7	33673.7	37970.9	1.16461	0.219845	0.101394	0.75	0.203628
Com_3721_pos	C1'-C9-Glycosylated UWM6	C25 H28 O9	472.175	11.189	Full match	No results	No results	28350.7	44570	111274	88324.4	105817	62950.3	21796.3	19247.3	24571.5	23464.2	11336.9	23974	3.5476	1.82684	0.00158906	1	1.58422
Com_3724_pos	Byakangelicin	C17 H18 O7	334.104	12.69	Full match	Invalid mass	No results	4.35496e+06	2.00464e+06	3.09535e+06	2.47859e+06	2.92927e+06	2.66272e+06	2.20187e+06	1.84526e+06	2.19289e+06	2.44056e+06	2.191e+06	3.33319e+06	1.23378	0.303082	0.168545	0.75	0.262466
Com_372_pos	Testosterone benzoate	C26 H32 O3	392.234	13.098	No results	Full match	No results	5.52212e+06	4.25105e+06	4.97915e+06	3.70799e+06	4.44852e+06	4.05863e+06	6.49319e+06	6.35412e+06	5.10101e+06	5.41021e+06	6.36514e+06	6.59023e+06	0.74262	-0.429303	0.00247719	0.944444	0.397027
Com_3733_pos	Butylphthalide	C12 H14 O2	190.099	14.749	Full match	No results	No results	12434.2	17519.3	11905.8	12213.4	20602.1	17924.2	15527	15071	20783.3	17455.6	17067.7	14278.4	0.924298	-0.11357	0.421903	0.583333	0.125212
Com_3736_pos	Butylparaben	C11 H14 O3	194.094	11.534	Full match	No results	No results	70657.8	58622.1	68693.4	64106.1	71796.6	73391.6	85537.4	66191	82997.2	76686.7	66809.2	70782.5	0.907047	-0.140751	0.124021	0.722222	0.129517
Com_3737_pos	Butylnaphthalene	C14 H16	184.125	13.11	Full match	Invalid mass	No results	7.60204e+06	1.17886e+07	1.24392e+07	1.18721e+07	1.24053e+07	1.40469e+07	1.26354e+07	1.22901e+07	1.19671e+07	1.19031e+07	1.32093e+07	1.23944e+07	0.942943	-0.0847577	0.429411	0.611111	0.0991485
Com_3738_pos	Butylbenzene	C10 H14	134.109	8.235	Full match	Invalid mass	No results	2.76105e+06	1.97039e+06	2.02749e+06	1.97622e+06	2.1417e+06	1.9861e+06	3.77048e+06	1.77193e+06	2.27547e+06	2.6324e+06	721062	1.08422e+06	1.04956	0.0697849	0.50413	0.444444	0.303847
Com_3741_pos	Butyl D-fructopyranoside	C10 H20 O6	236.125	7.294	Full match	No results	No results	3.91415e+06	2.76178e+06	2.80801e+06	2.99423e+06	3.16129e+06	3.98048e+06	3.25365e+06	2.00165e+06	2.45258e+06	2.55643e+06	2.5152e+06	2.31869e+06	1.29949	0.377944	0.0178595	0.888889	0.343703
Com_3742_pos	Butyl benzoate	C11 H14 O2	178.099	9.116	Partial match	Full match	No results	761851	691465	399610	637549	719711	741785	814281	616566	652769	593303	442081	548934	1.07744	0.107604	0.6004	0.666667	0.091914
Com_3746_pos	Butyl 2-{4-[4-(5,5-dimethyl-1,3,2-dioxaborinan-2-yl)-2-fluorophenoxy]phenoxy}propanoate	C24 H30 B F O6	444.212	12.199	Full match	Invalid mass	No results	1.08222e+06	165091	388582	269124	277633	309729	143374	88767.4	119023	99122.5	100388	26877.4	4.31541	2.1095	0.00295023	1	1.81468
Com_3747_pos	Butyl (3beta,7beta,12beta)-12-acetoxy-3,7-dihydroxy-4,4,14-trimethyl-11,15-dioxochol-8-en-24-oate	C33 H50 O8	574.349	12.8	Full match	Invalid mass	No results	57266.8	88835	93470.3	57820.7	92817.2	58971.9	82595	152061	93370.8	64875.6	72131.2	96257.3	0.800266	-0.321448	0.218902	0.722222	0.27732
Com_3751_pos	Butopyronoxyl	C12 H18 O4	226.12	8.588	Full match	No results	No results	73705	51645.6	54880.3	55917.1	71537.2	82931.6	154318	55584.7	123349	196570	74602.5	70830	0.578474	-0.789675	0.0755449	0.777778	0.61357
Com_3754_pos	butenylbenzene	C10 H12	132.094	13.105	Full match	Invalid mass	No results	1.90583e+07	1.73971e+07	1.75093e+07	1.76766e+07	1.67137e+07	1.51943e+07	1.76635e+07	1.8296e+07	1.65187e+07	1.75308e+07	2.04066e+07	1.88838e+07	0.947392	-0.0779659	0.231071	0.694444	0.0778362
Com_3768_pos	Bufotalin	C26 H36 O6	444.252	10.699	Full match	No results	No results	58115.9	90681.8	141504	72373.2	104514	107026	77525.4	72446.6	87142.7	44014.7	31350	67562.7	1.51092	0.59543	0.0638254	0.805556	0.600156
Com_376_pos	Testosterone	C19 H28 O2	288.21	13.203	Full match	No results	No results	15451.3	17893.8	15570.9	15065.9	14301.1	15278.7	15958.9	16128.2	16567.7	14277.4	23816.3	16108.3	0.90963	-0.136648	0.322129	0.722222	0.128572
Com_3770_pos	Buflomedil	C17 H25 N O4	307.177	9.395	Full match	No results	No results	38211.1	29960.3	25808.1	28674.2	24304.7	31344.2	17833.5	21773.1	14301.8	24997.7	25071.1	17209.8	1.4713	0.557093	0.00664519	0.944444	0.525314
Com_3771_pos	Bufalin	C24 H34 O4	386.244	13.601	Full match	Invalid mass	No results	13878.3	15596.4	13005.8	21085.8	16238.3	14614.4	12043.7	19230.2	24077.9	13456.1	10189.6	13877.6	1.01662	0.0237858	0.755794	0.638889	0.0730202
Com_3773_pos	Bufa-20,22-dienolide	C24 H34 O2	354.255	13.681	Full match	No results	No results	98327.4	61407.5	78233.9	37213.7	93920	78336.3	87227.5	94710.9	85117.6	106680	124032	112685	0.732961	-0.448192	0.0654405	0.861111	0.459138
Com_3774_pos	Budesonide	C25 H34 O6	430.235	11.425	Full match	No results	No results	116422	92957.4	113601	263533	107400	257382	76386.8	63656	108525	91340	70247.7	73851	1.96546	0.974868	0.0242062	0.944444	0.783973
Com_3775_pos	Buchananine	C12 H15 N O7	285.084	1.292	Full match	No results	No results	744844	450106	421942	461791	489658	325207	514927	323543	597943	305206	403440	407307	1.13367	0.181004	0.442326	0.666667	0.161007
Com_3776_pos	bryostatin 16	C42 H62 O14	790.417	12.411	Full match	No results	No results	854326	702022	477432	854650	654068	1.30241e+06	216407	105738	191803	238773	303241	140543	4.04922	2.01764	5.06378e-05	1	1.85086
Com_3777_pos	brusatol	C26 H32 O11	520.194	7.738	Full match	Invalid mass	No results	418474	439616	428482	488683	377243	284892	587471	364842	662224	323375	190528	496762	0.928458	-0.107092	0.969515	0.555556	0.161509
Com_3779_pos	BRUCEANTIN	C28 H36 O11	548.223	11.464	Full match	Invalid mass	No results	6186.25	4758.02	6170.58	5084.01	5722.09	5230.46	72706.5	26425.2	54341.2	27594.3	6144.74	42591.7	0.14426	-2.79326	0.00472282	0.944444	2.25313
Com_3781_pos	bromchlorenone	C7 H3 Br Cl N O2	246.905	1.162	Full match	No results	No results	987304	966662	900133	853591	875461	749686	716042	1.02298e+06	806072	938289	1.13546e+06	1.21348e+06	0.914357	-0.12917	0.429202	0.638889	0.112019
Com_3782_pos	Brodimoprim	C13 H15 Br N4 O2	338.039	5.532	Full match	No results	No results	7226.19	5189.31	6063.69	5603.48	13798.3	10742	36590.2	12496.8	23252.6	47072.7	12088.2	14397.5	0.333266	-1.58525	0.00624221	0.944444	1.35034
Com_3783_pos	Brivudine	C11 H13 Br N2 O5	332	5.306	Full match	No results	No results	133816	166199	205233	232341	205492	147781	162781	141282	155996	107194	87822.3	112188	1.42176	0.507676	0.0228397	0.861111	0.478541
Com_3784_pos	Brivaracetam	C11 H20 N2 O2	212.152	6.152	Full match	No results	No results	86027.5	94434.6	98193.9	171510	72088.6	81059.1	27046.7	26337.4	17069.9	15107.7	28088.5	22267.2	4.43883	2.15018	4.70449e-06	1	1.93823
Com_3785_pos	Brivanib	C19 H19 F N4 O3	370.144	8.182	Full match	No results	No results	9793	16027.1	10841.7	18741.4	14503.6	18120.4	17022.7	14150.7	16772.6	14006.1	9425.15	12534.7	1.04904	0.0690716	0.795505	0.611111	0.0732432
Com_3788_pos	Briarellin Q	C24 H38 O7	438.261	10.928	Full match	Invalid mass	No results	311423	299327	198252	202831	217598	251033	410578	182540	183328	263465	136152	173820	1.09674	0.133216	0.441165	0.722222	0.207198
Com_3789_pos	briaexcavatin J	C28 H38 O13	582.229	10.679	Full match	No results	No results	7641.85	8853.28	10909.9	6619.47	7282.47	7169.52	103224	10496.8	19663.9	46842.8	16066.1	20123.4	0.223996	-2.15846	0.0160978	0.972222	1.57468
Com_378_pos	testolic acid	C19 H28 O4	320.198	12.566	Full match	Invalid mass	No results	309168	411721	387276	304465	353180	254147	192157	408408	229586	140963	285666	281078	1.31349	0.393401	0.0990345	0.805556	0.416694
Com_3790_pos	briaexcavatin A	C28 H36 O14	596.21	9.113	Full match	No results	No results	5745.84	4622.93	5180.61	5303.06	5131.67	5285.08	5983.24	4967.63	4904.63	5175.93	4783.04	4839.17	1.02008	0.0286843	0.649816	0.666667	0.0283972
Com_3793_pos	Brevione A	C27 H36 O4	424.26	13.521	Full match	No results	No results	10608.3	13541.1	14389.1	15325.7	16519	15108.7	18658	15280.3	19136.4	15458.5	15245.9	18563.8	0.835348	-0.25955	0.0421926	0.861111	0.244778
Com_3794_pos	BQ-123	C31 H42 N6 O7	610.313	11.464	Full match	No results	No results	17302.7	10222.9	9020.5	10033.3	11816.2	14009.5	7622.1	8884.35	12397	7841.81	8416.76	14527.4	1.21303	0.278618	0.207031	0.75	0.260991
Com_3795_pos	bongkrek acid	C28 H38 O7	486.261	11.515	Full match	No results	No results	13954.4	12397.7	15556.6	13017.9	12638.1	13848.3	14358.3	13907.2	12957.1	12835.1	12366.1	13032.3	1.02463	0.0351017	0.592927	0.555556	0.0354512
Com_3796_pos	Boldione	C19 H24 O2	284.177	14.084	Full match	No results	No results	28157.7	29434.2	30224.6	34078.8	23186.9	24775.1	36117.9	31802	37375.6	29826.1	32060	39041.5	0.823658	-0.279883	0.0215832	0.888889	0.259429
Com_3798_pos	Bolandione	C18 H24 O2	272.177	11.534	Full match	Invalid mass	No results	67154.8	55685.3	73887.5	49277.7	53859.3	59821.3	36737.9	40900.9	99375.5	40958.5	30919	32243	1.27941	0.355475	0.12537	0.833333	0.450054
Com_3799_pos	Boceprevir	C27 H45 N5 O5	519.34	12.062	Full match	No results	No results	102198	115068	152811	193155	123505	110779	52388.2	100011	51130.2	28055.1	78039.9	37659.1	2.29644	1.1994	0.00347338	1	1.18034
Com_379_pos	Testolactone	C19 H24 O3	300.172	13.812	Full match	Invalid mass	No results	8990.44	11234.9	9202.51	9566.87	9591.96	9198.29	13115.3	8430.09	9544.45	11127.9	11742	17623.5	0.807242	-0.308927	0.138433	0.722222	0.247792
Com_3800_pos	Boc-D-Asn-OH	C9 H16 N2 O5	232.105	1.317	Full match	Invalid mass	No results	6.09933e+06	5.70794e+06	8.4199e+06	6.54998e+06	6.5606e+06	6.82152e+06	8.53918e+06	9.00282e+06	8.41012e+06	1.05637e+07	1.00977e+07	9.85737e+06	0.71115	-0.491775	0.000558998	0.972222	0.453004
Com_3804_pos	BML-190	C23 H23 Cl N2 O4	426.133	10.034	Full match	No results	No results	346365	280906	221167	237050	253656	373773	345052	335840	230923	212189	181377	173973	1.15788	0.211488	0.294931	0.75	0.217587
Com_3806_pos	BMK methyl glycidate	C11 H12 O3	192.078	7.344	Partial match	Full match	No results	1.30835e+06	988311	804738	1.13912e+06	1.7242e+06	1.2731e+06	2.73934e+06	1.07731e+06	2.87834e+06	3.22705e+06	947207	1.76761e+06	0.572755	-0.804011	0.0855747	0.75	0.647434
Com_3807_pos	blastmycin	C26 H36 N2 O9	520.241	8.766	Full match	No results	No results	40137.4	21729.6	33316.3	33089.9	29957.5	48874.9	24725	29248.3	37397.1	31339.9	55335.8	42109.5	0.940724	-0.0881569	0.735014	0.527778	0.121347
Com_3809_pos	BIX01294	C28 H38 N6 O2	490.307	12.547	Full match	No results	No results	397456	441239	484901	390945	392710	331659	253397	428237	314548	130834	439541	349291	1.27302	0.348253	0.160921	0.75	0.413982
Com_380_pos	Testate	C26 H40 O3	400.297	12.774	Full match	No results	No results	768498	839307	831989	966660	627307	727091	315933	579834	443117	310623	452350	411945	1.89389	0.921349	0.000371364	1	0.859064
Com_3814_pos	bistratamide H	C25 H32 N6 O4 S2	544.192	8.385	Full match	No results	No results	338643	269159	419109	303460	343736	217765	644700	424374	564796	1.5476e+06	338190	473026	0.473835	-1.07754	0.0324867	0.916667	0.845561
Com_3816_pos	bistratamide E	C25 H34 N6 O4 S2	546.207	9.079	Full match	No results	No results	13134.3	8533.17	11290.4	9162.86	8866.73	9446.61	9902.25	8583.29	8555.08	9213.83	10447.3	11395.1	1.04023	0.056901	0.70034	0.5	0.0443175
Com_3819_pos	bisphenol c	C17 H20 O2	256.146	13.914	Full match	Invalid mass	No results	29526.8	21983.3	29177.2	18944.3	20167	17188.6	18767.7	22066.1	21210.1	20952.1	18698.4	24671.1	1.08406	0.116438	0.55127	0.444444	0.0931079
Com_381_pos	tesaglitazar	C20 H24 O7 S	408.125	12.242	Full match	No results	No results	22997.9	35562.8	25375.8	35443.4	34538	36079.2	81293.7	115344	109791	134072	74589.7	131850	0.293686	-1.76766	3.87839e-06	1	1.59893
Com_3822_pos	Bisphenol B	C16 H18 O2	242.13	11.519	Full match	No results	No results	11922.2	9070.62	7634.6	9594.85	10752.2	8574.23	9869.1	9908.58	12350.3	13612.9	9414.32	11858.7	0.858758	-0.219676	0.11591	0.777778	0.202308
Com_3826_pos	bisphenol A	C15 H16 O2	228.115	10.333	Full match	No results	No results	261502	203906	135896	125053	240456	66188.1	261605	274815	372506	317042	268945	240588	0.595218	-0.748509	0.0334223	0.972222	0.797242
Com_3829_pos	Bisbentiamine	C38 H42 N8 O6 S2	770.264	9.676	Full match	No results	No results	25818.1	23587.3	23224.4	22068.5	19018.9	24053.4	43014.6	38489.3	32802.7	35772.4	20433.4	26233.7	0.700245	-0.514067	0.0303245	0.861111	0.438316
Com_3830_pos	Bisabolol oxide A	C15 H26 O2	238.193	11.585	Full match	Invalid mass	No results	9582.83	10710.9	13036.3	20420.2	11924.8	10774.4	14986.2	12748.2	7825.26	7292.9	17643.8	16283.2	0.9957	-0.00621662	0.922632	0.527778	0.110715
Com_3831_pos	Bis(trimethylsilyl)acetylene	C8 H18 Si2	170.095	11.776	Full match	No results	No results	5.59602e+06	5.03951e+06	6.17544e+06	4.99956e+06	3.66216e+06	7.83012e+06	7.45604e+06	6.28525e+06	6.51827e+06	8.73119e+06	6.6525e+06	6.75322e+06	0.785509	-0.3483	0.0551781	0.861111	0.343708
Com_3832_pos	Bis(pinacolato)diboron	C12 H24 B2 O4	254.187	10.738	Full match	No results	No results	25552.4	26723.4	33582.7	28855	27770.6	34401.2	39490.2	27394.3	34500.6	22130.1	17965.8	32056	1.01929	0.0275705	0.726824	0.5	0.120355
Com_3833_pos	Bis(methylbenzylidene)sorbitol	C22 H26 O6	386.172	11.955	Partial match	Full match	No results	4.95857e+07	4.47365e+07	5.95652e+07	5.1139e+07	3.31972e+07	6.87957e+07	6.97244e+07	5.46566e+07	6.14134e+07	7.48951e+07	5.90008e+07	6.06108e+07	0.807305	-0.308814	0.0763309	0.833333	0.307637
Com_3834_pos	Bis(glutathionyl)spermine	C30 H56 N10 O10 S2	780.359	10.699	Full match	No results	No results	5958.27	5940.44	7105.6	6466.37	5771.52	8430.7	41135.6	13257.5	16176.6	18686.2	10413.6	7396.79	0.370546	-1.43228	0.0154765	0.972222	1.11443
Com_3835_pos	Bis(4-hydroxyphenyl)methanol	C13 H12 O3	216.078	7.756	Full match	Invalid mass	No results	132734	85212.5	109066	111990	154443	116565	95335	90482.8	102804	127085	71846.3	94331.6	1.22019	0.287107	0.1076	0.777778	0.267775
Com_3836_pos	Bis(4-ethylbenzylidene)sorbitol	C24 H30 O6	414.203	12.569	Partial match	Full match	No results	1.44098e+07	9.86127e+06	1.39e+07	1.04957e+07	7.33191e+06	2.31643e+07	2.35221e+07	1.23747e+07	2.0444e+07	3.38705e+07	1.67662e+07	1.96456e+07	0.625186	-0.677644	0.0442257	0.833333	0.645828
Com_3837_pos	Bis(3-azidopropyl) malonate	C9 H14 N6 O4	270.107	7.777	Full match	Invalid mass	No results	449598	443366	507276	577041	570960	438984	495148	541270	542670	344901	204692	333373	1.21331	0.278944	0.190247	0.694444	0.338312
Com_3839_pos	Bis(2-methyl-2-propanyl) 2-allyl-4-[{[(4-methoxyphenyl)sulfonyl]amino}(phenyl)methyl]-2,3-pentadienedioate	C30 H37 N O7 S	555.231	6.962	Full match	No results	No results	74893.5	58162.9	72560.2	69134.4	59360.8	57789.2	69193.3	71791.8	56978.3	38639	36534	43694.3	1.23694	0.306777	0.10606	0.777778	0.321758
Com_383_pos	tert-Butyl Benzoate	C11 H14 O2	178.099	14.616	Full match	Invalid mass	No results	11103.6	6700.82	12599	10918.5	11578.2	10037.1	14708.5	6947.2	7472.88	12714.7	8278.16	9357.42	1.05815	0.081539	0.628546	0.555556	0.123883
Com_3842_pos	Bis(2-methyl-2-propanyl) 2-[{[(4-methoxyphenyl)sulfonyl]amino}(phenyl)methyl]-4-(3-methyl-2-buten-1-yl)-2,3-pentadienedioate	C32 H41 N O7 S	583.261	8.189	Full match	No results	No results	19893.6	15665.8	11496.5	22489.1	15863.3	24933.8	37647.1	22908.4	10043.1	27546	24451.9	8104.8	0.844232	-0.244288	0.816589	0.611111	0.161428
Com_3843_pos	Bis(2-methyl-2-propanyl) 2-(1-{[(4-methoxyphenyl)sulfonyl]amino}-2,2-dimethylpropyl)-4-methyl-2,3-pentadienedioate	C26 H39 N O7 S	509.246	10.862	Full match	No results	No results	12325.8	14081	14848.2	7473.57	14381.5	25578.9	30590.9	15862.5	16186.4	20091.9	7992.39	14045.6	0.846514	-0.240395	0.541182	0.666667	0.260799
Com_3844_pos	Bis(2-methyl-2-propanyl) {4-[(4-aminobutyl)carbamoyl]-1,2-phenylene}biscarbamate	C21 H34 N4 O5	422.252	6.709	Full match	No results	No results	39060.2	40850.1	39005.9	40991.5	39516.8	30840.1	4703.16	4316.35	4319.78	4682.4	6942.5	4321.71	7.86265	2.97501	1.00555e-08	1	2.72441
Com_3846_pos	Bis(2-methyl-2-propanyl) [7-(2,2-dimethyl-4,11-dioxo-3,12-dioxa-5,10-diazapentadecan-15-yl)-6-(fluoroacetyl)-5-(4-methylphenyl)-7H-pyrrolo[2,3-d]pyrimidin-4-yl]imidodicarbonate	C38 H53 F N6 O9	756.389	14.829	Full match	No results	No results	642737	532842	351893	545112	529209	489732	445923	296278	250609	471910	263737	605905	1.32436	0.40529	0.0953111	0.805556	0.422272
Com_3847_pos	Biocytin	C16 H28 N4 O4 S	372.182	6.337	Full match	Full match	No results	67245.8	67133.7	69094	63884.6	69824.6	71062.9	74034.4	62701.4	70757	88249.5	68480	59868.3	0.962638	-0.0549351	0.617198	0.555556	0.0476141
Com_3848_pos	Binodenoson	C17 H25 N7 O4	391.199	7.409	Full match	No results	No results	25095.4	27155	14799.3	17476.6	25572.1	27745.7	34199.2	29752.3	24158.4	29049.5	26105.9	14266.3	0.875025	-0.192604	0.463265	0.666667	0.173108
Com_3849_pos	Binapacryl	C15 H18 N2 O6	322.116	8.505	Full match	Invalid mass	No results	646214	678635	684086	702481	591142	481715	890732	567798	533253	604309	428245	517131	1.06856	0.0956686	0.483137	0.694444	0.130427
Com_384_pos	tert-Butyl 4-(4-(4-amino-3-(4-fluoro-3-nitrophenyl)-1H-pyrazolo[3,4-d]pyrimidin-1-yl)cyclohexyl)piperazine-1-carboxylate	C26 H33 F N8 O4	540.26	12.057	Full match	Invalid mass	No results	105359	153727	116789	179976	143364	133370	65207.9	111550	56843.7	40099.1	112132	62401.8	1.85748	0.893344	0.00750163	0.944444	0.892547
Com_3850_pos	bikaverin	C20 H14 O8	382.069	1.171	Full match	No results	No results	308006	226955	366599	332266	329881	234706	549227	319319	367265	382527	241455	278244	0.841152	-0.249562	0.309112	0.694444	0.222297
Com_3852_pos	bifenazate	C17 H20 N2 O3	300.146	8.913	Full match	No results	No results	267809	236259	243009	237441	214903	195064	24633.3	25109.5	17339.7	17083.1	42002.7	19444.9	9.57664	3.25952	3.75683e-06	1	3.03109
Com_3854_pos	bielschowskysin	C22 H26 O9	434.157	7.391	Full match	No results	No results	57830.1	53198	58280.6	72007.8	62106.3	109948	65782.9	52211.3	67091.8	55909.6	42997	56430.3	1.21429	0.280109	0.209293	0.722222	0.231855
Com_3855_pos	Bicyclomycin	C12 H18 N2 O7	302.112	9.074	Full match	Invalid mass	No results	242983	237421	249652	287973	245960	212063	215230	329579	217976	282628	295753	348900	0.873369	-0.195338	0.226934	0.694444	0.166931
Com_3857_pos	Bibenzyl	C14 H14	182.109	13.054	Full match	Invalid mass	No results	5.27068e+06	4.96357e+06	5.54655e+06	4.96093e+06	7.64537e+06	5.83943e+06	5.74523e+06	5.35451e+06	5.70865e+06	8.51287e+06	6.33229e+06	5.22317e+06	0.928133	-0.107596	0.484046	0.666667	0.0965404
Com_385_pos	tert-butyl 4-(2-methoxyphenyl)-6-methyl-2-thioxo-1,2,3,4-tetrahydropyrimidine-5-carboxylate	C17 H22 N2 O3 S	334.135	9.501	Full match	No results	No results	16245.7	14594.9	16567.8	16185.6	11895.9	11714	37776.9	15769.7	9368.17	25358	13626.2	23215.8	0.696991	-0.520788	0.252859	0.638889	0.359156
Com_3862_pos	Biacetyl	C4 H6 O2	86.0367	1.192	Full match	Invalid mass	No results	5.51955e+07	4.69458e+07	4.30063e+07	4.04002e+07	4.55145e+07	4.66247e+07	1.23982e+07	1.0859e+07	1.25884e+07	1.52009e+07	2.87961e+07	1.14027e+07	3.0433	1.60564	0.00030814	1	1.54124
Com_3865_pos	Bexarotene	C24 H28 O2	348.208	11.216	Full match	No results	No results	25232.7	25833.5	27784.6	30295.8	27182.2	30024.4	19677.3	15285	20460.6	18520.9	9247.07	10480.1	1.77593	0.828575	0.00597295	1	0.821357
Com_3867_pos	Bevenopran	C20 H26 N4 O4	386.194	11.053	Full match	No results	No results	18797.5	16585.8	14988.1	12209.9	17831.1	12196.9	14011.8	5675.11	8200.14	11260.4	11192.3	12832.1	1.46599	0.55188	0.0311636	0.888889	0.542334
Com_3868_pos	Betaxolol	C18 H29 N O3	307.214	12.821	Full match	No results	No results	28590.2	23913.6	24841.1	20095.3	24887.6	20373.4	67159.7	36207.6	33197.7	39380.8	213136	31387.2	0.339386	-1.559	0.0442422	1	1.08886
Com_3869_pos	beta-Syringin	C17 H24 O9	372.141	6.159	Full match	No results	No results	84399.9	66226.1	59985.3	57963.3	64184.6	58727.8	76726.7	50895.5	50979.5	55426.9	23937.6	35477.9	1.33411	0.415879	0.0951011	0.861111	0.467802
Com_386_pos	tert-Butyl 2-(methoxy(methyl)carbamoyl)pyrrolidine-1-carboxylate	C12 H22 N2 O4	258.159	12.794	Full match	No results	No results	24742.9	32072.9	22776.4	43065.1	21279	19623	29634.1	30272	26309.1	22879.5	23298.2	27025.2	1.02598	0.0369989	0.955652	0.611111	0.0249283
Com_3873_pos	beta-styrylacrylic acid	C11 H10 O2	174.068	13.231	Full match	Invalid mass	No results	28173.5	23594.3	31374.3	29273.2	23531.1	25310.5	24212.3	21093.6	24318.1	24028.4	15813.6	36505.5	1.10472	0.143674	0.336937	0.666667	0.189157
Com_3875_pos	Beta-Naphthoxyacetic Acid	C12 H10 O3	202.063	6.91	Full match	No results	No results	5915.73	5231.27	5822.96	5997.94	4604.27	7587.83	10047.7	4713.84	4653.24	35244.8	6156.58	5987.53	0.526318	-0.925994	0.338719	0.638889	0.45449
Com_3876_pos	Betamipron	C10 H11 N O3	193.074	6.208	Full match	No results	No results	5257.41	3962.7	4453.8	3598.36	4133.08	4152.26	3127.22	2235.18	21508.4	3522.89	4004.33	2236.14	0.697645	-0.519435	0.931447	0.777778	0.117972
Com_3877_pos	Betamethasone dipropionate	C28 H37 F O7	504.253	12.445	Full match	No results	No results	34441.8	34978.6	40809.6	38809.6	38980.5	36116.7	47418.3	62966.3	55361.1	39457.2	49243.1	55855.9	0.722319	-0.469293	0.00348532	0.972222	0.416252
Com_3878_pos	Betamethasone 17-valerate	C27 H37 F O6	476.259	11.764	Full match	No results	No results	7478.1	19416.5	39025.2	7923.76	17770.8	7985.9	7649.24	97061.9	21974.5	22295.7	7550.07	44808.5	0.494688	-1.01541	0.341182	0.666667	0.684917
Com_3881_pos	betamethasone 17-benzoate	C29 H33 F O6	496.228	8.954	Full match	Invalid mass	No results	45954.1	39325.1	43374.2	25426.4	44252.8	41733.7	38584.1	47945.6	45849.5	23612.4	27568.5	25650.8	1.14748	0.198475	0.330958	0.611111	0.212512
Com_3885_pos	beta-Ionone	C13 H20 O	192.151	10.031	Full match	Invalid mass	No results	2.20235e+07	1.60587e+07	1.57732e+07	1.67797e+07	1.90068e+07	2.44465e+07	2.46211e+07	2.74406e+07	1.70805e+07	1.86322e+07	1.109e+07	1.57479e+07	0.99543	-0.00660847	0.876125	0.5	0.047201
Com_3888_pos	beta-D-Xylp-(1->4)-beta-D-Xylp-(1->4)-beta-D-Xylp	C15 H26 O13	414.136	13.988	Full match	No results	No results	151583	107258	115465	90871.1	186550	108170	141727	67248.4	78858.2	111114	55819.5	58394.8	1.48081	0.566389	0.0493912	0.805556	0.569123
Com_3889_pos	beta-D-Xylopyranosyl-(1->3)-beta-D-xylopyranosyl-(1->4)-6-deoxy-alpha-L-mannopyranosyl-(1->2)-1-O-[(3beta)-3-{[alpha-L-arabinopyranosyl-(1->2)-[beta-D-xylopyranosyl-(1->3)]-beta-D-glucopyranuronosyl]oxy}-24,28-dioxoolean-12-en-28-yl]-6-deoxy-4-O-[(2E)-3-(4-methoxyphenyl)-2-propenoyl]-beta-D-galactopyranose	C78 H114 O36	1626.7	13.808	Full match	No results	No results	11681.7	10730.4	11528.9	11707.6	11756.5	12298.6	11375.7	10316.4	11915.4	10455.8	8955.64	12023.4	1.07167	0.0998541	0.180135	0.694444	0.104808
Com_388_pos	tert-Butyl (4-(1,3-dioxoisoindolin-2-yl)butyl)((tributylstannyl)methyl)carbamate	C30 H50 N2 O4 Sn	622.278	15.146	Full match	No results	No results	230938	78253.2	57454.5	314443	154967	265461	10505.3	9671.03	10177.8	9944.75	9470.13	9537.49	18.5733	4.21516	0.000190784	1	3.61117
Com_3890_pos	beta-D-glucosyl crocetin	C26 H34 O9	490.22	10.618	Full match	No results	No results	18993	18226.3	20239.3	20999.5	19367.5	20815.6	22692.7	23310.5	21663.9	24290.9	21563.2	22250.9	0.873827	-0.194581	0.00107366	1	0.17778
Com_3891_pos	beta-D-Glucopyranuronosyl-(1->2)-alpha-D-mannopyranosyl-(1->3)-beta-D-glucopyranosyl-(1->4)-1-O-{hydroxy[(hydroxy{[(2Z,6Z,10Z,14Z,18Z,22Z,26Z,30Z,34E,38E)-3,7,11,15,19,23,27,31,35,39,43-undecamethyl-2,6,10,14,18,22,26,30,34,38,42-tetratetracontaundecaen-1-yl]oxy}phosphoryl)oxy]phosphoryl}-alpha-D-glucopyranose	C79 H130 O28 P2	1588.82	13.191	Full match	No results	No results	517479	410828	491773	494457	489527	717037	133228	248400	178294	286390	528754	150617	2.04571	1.0326	0.00917479	0.861111	1.08413
Com_3892_pos	beta-D-Glcp-(1->4)-alpha-L-Rhap-(1->3)-beta-D-Glcp	C18 H32 O15	488.173	12.329	Full match	No results	No results	847727	771343	840416	924716	703867	783748	441935	546461	370117	235647	456901	344124	2.03401	1.02432	0.00102951	1	0.973562
Com_3894_pos	beta-D-Galactopyranosyl-(1->4)-3,6-anhydro-alpha-L-galactopyranosyl-(1->3)-beta-D-galactopyranose	C18 H30 O15	486.158	1.31	Full match	No results	No results	67135.2	63031.7	86237.7	60885.7	68552.2	70746.9	125280	66443	70923.6	71057.1	52227.2	50700.3	0.9541	-0.0677875	0.972693	0.5	0.0902186
Com_3895_pos	beta-Aspartylcysteine	C7 H12 N2 O5 S	236.047	10.408	Full match	No results	No results	15989.4	19765.1	12176.7	11366.7	14498.3	10317.3	17720	11545	13395.2	15104.1	9885.36	9644.23	1.08823	0.12198	0.558409	0.611111	0.128776
Com_3898_pos	beta,beta-Dimethylacrylshikonin	C21 H22 O6	370.141	9.682	Full match	No results	No results	98432.9	84617.6	111170	116210	82555.3	101271	167422	106407	88576	131379	66491.3	83867.6	0.922554	-0.116294	0.784934	0.472222	0.0975021
Com_3899_pos	Besonprodil	C21 H23 F N2 O3 S	402.142	7.795	Full match	No results	No results	24556.5	22039.5	33886.5	27385.1	15689	24882.8	46536.4	24058.1	41779.4	34888.8	14689.5	35469	0.751891	-0.411404	0.261676	0.722222	0.36832
Com_3900_pos	berythromycin	C37 H67 N O12	717.465	14.423	Full match	No results	No results	51791.6	61380.8	48102.3	51615.5	50052.4	70785.8	37445.1	38240.9	69867.1	39775.6	58934.1	28086.5	1.22537	0.293216	0.150198	0.75	0.318693
Com_3902_pos	Benzyl succinate	C18 H18 O4	298.12	8.252	Full match	No results	No results	234629	147568	119808	107666	147553	123000	72320.1	114744	75458.2	82334.2	115269	118884	1.52022	0.604279	0.0207048	0.916667	0.539773
Com_3905_pos	Benzyl formate	C8 H8 O2	136.052	12.818	Full match	No results	No results	191555	158954	173225	132605	181116	162067	261237	247583	178498	168252	442813	197902	0.668003	-0.582074	0.0604962	0.861111	0.485346
Com_3908_pos	Benzyl beta-D-xylopyranoside	C12 H16 O5	240.099	13.137	Full match	No results	No results	341230	267824	268066	189522	291658	237991	495519	341732	261274	432700	477680	403769	0.661627	-0.595911	0.00993971	0.888889	0.535741
Com_390_pos	tert-Butyl (3-aminopropyl)((tributylstannyl)methyl)carbamate	C21 H46 N2 O2 Sn	478.256	11.497	Full match	No results	No results	209322	117903	155909	72966.6	138974	101230	176989	178353	116337	129031	173012	131646	0.879537	-0.185185	0.349065	0.638889	0.222895
Com_3911_pos	Benzyl 6-O-beta-D-xylopyranosyl-beta-D-glucopyranoside	C18 H26 O10	402.152	12.318	Full match	No results	No results	902898	961675	1.03014e+06	1.06008e+06	907931	956660	566393	1.05011e+06	753543	566716	583946	746214	1.36384	0.44767	0.0186246	0.861111	0.439678
Com_3913_pos	Benzyl 2-methyloctanoate	C16 H24 O2	248.177	10.086	Full match	No results	No results	9872.83	6768.26	6874.68	6603.36	5532.23	7981.14	8748.8	7232.81	8648.2	9573.95	6540.99	7057.28	0.912775	-0.131668	0.352962	0.666667	0.131644
Com_3914_pos	Benzyl {5-[(benzyloxy){[(2-methyl-2-propanyl)oxy]carbonyl}amino]pentyl}carbamate	C25 H34 N2 O5	442.246	8.966	Full match	No results	No results	87176.3	65640.5	31794.8	66208.6	120189	62644	12185.9	10749.1	10555.8	11883.4	11042.1	10912.2	6.44086	2.68725	0.000151466	1	2.35059
Com_3915_pos	Benzoyl-y-tropeine	C15 H19 N O2	245.141	8.434	Full match	No results	No results	22709.7	58003.7	4844.32	30804.2	41226.2	5357.28	5997.42	5117.3	7956.41	5758.58	7169.08	12646.2	3.6498	1.86782	0.0752049	0.694444	1.27804
Com_3916_pos	Benzoyl cyanide	C8 H5 N O	131.037	1.976	Full match	No results	No results	137737	120181	147797	146225	144935	242519	70695.5	160621	91737.9	89765.2	69249.8	107368	1.59371	0.672391	0.0139653	0.861111	0.634349
Com_3919_pos	Benzophenone	C13 H10 O	182.073	11.574	Full match	No results	No results	17791	14248.9	17895.1	16309.5	19441.8	14451.7	24256.2	15179.2	19550.3	15313.3	14152.2	13161.7	0.985486	-0.0210929	0.985064	0.555556	0.053069
Com_391_pos	tert-Butyl (3-(1,3-dioxoisoindolin-2-yl)propyl)((tributylstannyl)methyl)carbamate	C29 H48 N2 O4 Sn	608.262	14.863	Full match	No results	No results	271132	121762	87826	293625	169287	238034	38582.3	35598.2	33776.5	37019.7	43366.1	30447.7	5.4009	2.4332	0.000295563	1	2.10977
Com_3920_pos	Benzoic acid	C7 H6 O2	122.037	10.463	Full match	Invalid mass	No results	124434	106829	125670	121335	112855	97660.5	118445	122523	119422	107744	98871.1	97028.4	1.03727	0.0527949	0.539407	0.638889	0.0524468
Com_3922_pos	benzofenap	C22 H20 Cl2 N2 O3	430.087	8.936	Full match	No results	No results	6555.92	5921.68	9424.22	6289.2	6123.57	5729.65	5641.52	4637.03	4746.32	5744.74	5157.67	4897.15	1.29911	0.37752	0.0187327	0.972222	0.333296
Com_3923_pos	Benzetimide	C23 H26 N2 O2	362.199	11.154	Full match	No results	No results	35866.4	27410.2	17237.4	31545.7	30390.4	30723.9	6993.43	19017.6	16172.1	16828.3	37425.8	13334.6	1.57758	0.657713	0.0577947	0.805556	0.758063
Com_3924_pos	Benzene, 3-hexenyl-	C12 H16	160.125	12.542	Full match	Invalid mass	No results	5.86679e+06	6.65329e+06	4.46438e+06	1.01293e+07	5.76863e+06	7.01284e+06	2.70437e+06	1.14332e+07	7.87699e+06	3.45403e+06	9.35168e+06	5.06989e+06	1.00013	0.000181245	0.719202	0.472222	0.24231
Com_3927_pos	Benzene, 1-nonenyl-	C15 H22	202.172	13.706	Full match	Invalid mass	No results	1.04758e+07	1.68651e+07	1.54458e+07	1.17068e+07	1.44297e+07	8.81463e+06	7.67733e+06	8.86032e+06	7.20383e+06	6.40646e+06	4.37069e+06	1.22843e+07	1.66096	0.732018	0.0133383	0.888889	0.711443
Com_392_pos	tert-Butyl (2-oxo-2-((6-(6-(pyridin-2-yl)-1,4-dihydro-1,2,4,5-tetrazin-3-yl)pyridin-3-yl)amino)ethyl)carbamate	C19 H22 N8 O3	410.181	8.874	Full match	Invalid mass	No results	73445.5	56934.7	55135.8	65745.7	41695.2	30575.8	63096.9	42299.9	55896.2	58705.5	45556.9	46374.9	1.0372	0.0526876	0.961983	0.527778	0.0339487
Com_3933_pos	Benzene	C6 H6	78.0468	12.305	Full match	Invalid mass	No results	846113	1.01717e+06	1.019e+06	720492	1.11341e+06	1.12189e+06	681558	846582	758682	613404	649425	802785	1.34134	0.42367	0.00933307	0.888889	0.38081
Com_393_pos	tert-Butyl (2-(6-(6-methyl-1,4-dihydro-1,2,4,5-tetrazin-3-yl)nicotinamido)ethyl)carbamate	C16 H23 N7 O3	361.188	8.432	Full match	No results	No results	210999	185535	37791.4	204065	188995	203692	307842	125943	86756.8	375735	48323.3	41367.2	1.04575	0.0645414	0.599392	0.555556	0.336647
Com_3940_pos	Benzamide	C7 H7 N O	121.052	1.332	Full match	No results	No results	213554	129362	162195	162870	140377	168236	206284	197761	145394	212160	164753	181876	0.881222	-0.182423	0.187989	0.722222	0.172051
Com_3949_pos	Benzaldehyde	C7 H6 O	106.042	9.952	Full match	Invalid mass	No results	331832	341541	421423	406939	327910	259957	444302	163950	333984	408223	192118	248454	1.1667	0.222437	0.287785	0.611111	0.318655
Com_3951_pos	bentiamine	C26 H26 N4 O4 S	490.166	8.211	Full match	No results	No results	56538.1	72869.3	76875.9	84778.8	55727.2	89302.4	104428	95937.4	120340	52202.2	40373.3	31925.5	0.979527	-0.0298421	0.740802	0.5	0.136908
Com_3953_pos	Bensulfuron-methyl [ANSI, WSSA]	C16 H18 N4 O7 S	410.088	7.476	Full match	No results	No results	10420	15228	18560	16132.8	14448.2	14907.9	24359.7	13462.1	29335.9	21117.9	17493.1	23015.9	0.696487	-0.521831	0.0315908	0.833333	0.466723
Com_3955_pos	Benserazide	C10 H15 N3 O5	257.102	1.197	Full match	Invalid mass	No results	73515.2	89361.2	152435	121943	104520	120646	1.44649e+06	2.38505e+06	5.21517e+06	1.65231e+06	1.7329e+06	3.6517e+06	0.041186	-4.6017	1.82505e-06	1	4.07836
Com_3957_pos	Benfotiamine	C19 H23 N4 O6 P S	466.108	8.072	Full match	No results	No results	60796.6	32703.2	37014.5	66987.3	45546.3	47150.1	61612	66452.5	51970.8	46111.6	58192.3	69415.7	0.820336	-0.285713	0.127568	0.75	0.301682
Com_3958_pos	Bemegride	C8 H13 N O2	155.094	5.93	Full match	Invalid mass	No results	69535.4	78652.7	81663.7	87199.4	95483.1	71237.8	67224.2	138281	91602	89054.8	97328.1	157753	0.754429	-0.406544	0.117781	0.777778	0.325409
Com_3959_pos	belfosdil	C27 H50 O7 P2	548.305	6.957	Full match	No results	No results	35143.9	28251.4	25703.2	35309	30539.1	49504	4986	8301.45	4425.23	6126.44	12388.2	4394.18	5.03306	2.33144	2.68856e-05	1	2.19712
Com_395_pos	Tepraloxydim	C17 H24 Cl N O4	341.138	8.704	Full match	No results	No results	7652.66	6637.5	7144.52	6625.32	6618.63	6906.64	8129.61	7333.78	7134.86	7603.89	7237.68	7068.43	0.934327	-0.0980005	0.057895	0.805556	0.0896351
Com_3960_pos	Befunolol	C16 H21 N O4	291.146	7.185	Full match	Invalid mass	No results	89929.2	67271.7	17747.9	47579.4	67847.6	20517.7	14852.1	40673.5	12915.2	13531	14097	21154.1	2.65216	1.40717	0.0239118	0.888889	1.19215
Com_3961_pos	Beclomethasone	C22 H29 Cl O5	408.178	11.497	No match	Invalid mass	No results	8893	8102.71	8287.4	7916.11	7420.69	8223.74	8364.48	8684.37	8597.69	8271.67	8564.27	7155.09	0.984006	-0.0232612	0.694268	0.666667	0.0242888
Com_3965_pos	Bayer E 39 Soluble	C16 H22 N2 O6	338.147	6.754	Full match	No results	No results	21297.7	11885.4	30046.3	37104.9	32150.1	47102	86038	13680.2	25704.7	90000.5	11544.8	10626.5	0.755852	-0.403825	0.92948	0.583333	0.257565
Com_3966_pos	Batimastat	C23 H31 N3 O4 S2	477.174	7.544	Full match	No results	No results	3865.84	3299.93	3659.84	3467.09	4011.67	3873.27	4430.85	3768.19	4109.64	4355.01	4263.07	3936.77	0.891976	-0.164924	0.0165175	0.888889	0.151139
Com_3967_pos	Bathophenanthroline	C24 H16 N2	332.131	10.265	Full match	No results	No results	174149	96444.7	124809	182684	104099	205672	72058.5	70143.8	87792.6	55416.7	79506.1	88254	1.95921	0.970271	0.00263458	1	0.846416
[truncated: 2,553 more rows]

## Sheet: cc6vscc0_DAMs
ID	Name_des	Formula	Molecular Weight	RT [min]	ChemSpider_Results	mzCloud_Results	TCM_Results	pos_DZL6_1	pos_DZL6_2	pos_DZL6_3	pos_DZL6_4	pos_DZL6_5	pos_DZL6_6	pos_DZ_1	pos_DZ_2	pos_DZ_3	pos_DZ_4	pos_DZ_5	pos_DZ_6	FC	log2FC	Pvalue	ROC	VIP
[truncated: 4,159 more rows]

[truncated: 2 more sheets: cp0vscc0_DAMs, cp6vscc6_DAMs]
