# Supplementary material for: Integrated Transcriptomic and Metabolomic Analyses of Cold-Tolerant and Cold-Sensitive Pepper Species Reveal Key Genes and Essential Metabolic Pathways Involved in Response to Cold Stress
Source: Int J Mol Sci. 2022 Jun 15;23(12):6683. doi: 10.3390/ijms23126683 (PMC9224482; doi:10.3390/ijms23126683)
Supplement: Supplementary file 1 [file ijms-23-06683-s001.zip › S5_KEGGenrich DAMs.xlsx]

## Sheet: cp6vscp0_KEGGenrich
MapID	MapTitle	Pvalue	AdjustedPv	x1	x2	n	N	EnrichDirect	MetaIDs	kegg_cpd_id
map00430	Taurine and hypotaurine metabolism	0.00495018	0.163356	2	2	22	306	Over	Com_2058_pos Com_4155_pos	cpd:C00025,cpd:C00026
map00471	D-Glutamine and D-glutamate metabolism	0.00495018	0.163356	2	2	22	306	Over	Com_2058_pos Com_4155_pos	cpd:C00025,cpd:C00026
map00220	Arginine biosynthesis	0.027157	0.204726	2	4	22	306	Over	Com_2058_pos Com_4155_pos	cpd:C00025,cpd:C00026
map00340	Histidine metabolism	0.027157	0.204726	2	4	22	306	Over	Com_2058_pos Com_4155_pos	cpd:C00025,cpd:C00026
map00365	Furfural degradation	0.027157	0.204726	2	4	22	306	Over	Com_4155_pos Com_5711_pos	cpd:C00026,cpd:C01546
map00630	Glyoxylate and dicarboxylate metabolism	0.027157	0.204726	2	4	22	306	Over	Com_2058_pos Com_4155_pos	cpd:C00025,cpd:C00026
map00650	Butanoate metabolism	0.027157	0.204726	2	4	22	306	Over	Com_2058_pos Com_4155_pos	cpd:C00025,cpd:C00026
map00660	C5-Branched dibasic acid metabolism	0.027157	0.204726	2	4	22	306	Over	Com_2058_pos Com_4155_pos	cpd:C00025,cpd:C00026
map01064	Biosynthesis of alkaloids derived from ornithine, lysine and nicotinic acid	0.0279172	0.204726	3	10	22	306	Over	Com_173_pos Com_2058_pos Com_4155_pos	cpd:C00729,cpd:C00025,cpd:C00026
map00250	Alanine, aspartate and glutamate metabolism	0.0432898	0.263617	2	5	22	306	Over	Com_2058_pos Com_4155_pos	cpd:C00025,cpd:C00026
map00480	Glutathione metabolism	0.062116	0.263617	2	6	22	306	Over	Com_2058_pos Com_2088_pos	cpd:C00025,cpd:C01419
map00860	Porphyrin and chlorophyll metabolism	0.062116	0.263617	2	6	22	306	Over	Com_2058_pos Com_985_pos	cpd:C00025,cpd:C18021
map00910	Nitrogen metabolism	0.0718954	0.263617	1	1	22	306	Over	Com_2058_pos	cpd:C00025
map01051	Biosynthesis of ansamycins	0.0718954	0.263617	1	1	22	306	Over	Com_667_pos	cpd:C12044
map04122	Sulfur relay system	0.0718954	0.263617	1	1	22	306	Over	Com_621_pos	cpd:C00019
map04730	Long-term depression	0.0718954	0.263617	1	1	22	306	Over	Com_3618_pos	cpd:C00942
map04744	Phototransduction	0.0718954	0.263617	1	1	22	306	Over	Com_3618_pos	cpd:C00942
map04921	Oxytocin signaling pathway	0.0718954	0.263617	1	1	22	306	Over	Com_3618_pos	cpd:C00942
map00330	Arginine and proline metabolism	0.106155	0.295596	2	8	22	306	Over	Com_2058_pos Com_621_pos	cpd:C00025,cpd:C00019
map00906	Carotenoid biosynthesis	0.130628	0.295596	2	9	22	306	Over	Com_3693_pos Com_81_pos	cpd:C08583,cpd:C08614
map00020	Citrate cycle (TCA cycle)	0.138841	0.295596	1	2	22	306	Over	Com_4155_pos	cpd:C00026
map00040	Pentose and glucuronate interconversions	0.138841	0.295596	1	2	22	306	Over	Com_4155_pos	cpd:C00026
map00053	Ascorbate and aldarate metabolism	0.138841	0.295596	1	2	22	306	Over	Com_4155_pos	cpd:C00026
map00640	Propanoate metabolism	0.138841	0.295596	1	2	22	306	Over	Com_839_pos	cpd:C00804
map04022	cGMP-PKG signaling pathway	0.138841	0.295596	1	2	22	306	Over	Com_3618_pos	cpd:C00942
map04270	Vascular smooth muscle contraction	0.138841	0.295596	1	2	22	306	Over	Com_3618_pos	cpd:C00942
map04540	Gap junction	0.138841	0.295596	1	2	22	306	Over	Com_3618_pos	cpd:C00942
map04611	Platelet activation	0.138841	0.295596	1	2	22	306	Over	Com_3618_pos	cpd:C00942
map04713	Circadian entrainment	0.138841	0.295596	1	2	22	306	Over	Com_3618_pos	cpd:C00942
map04740	Olfactory transduction	0.138841	0.295596	1	2	22	306	Over	Com_3618_pos	cpd:C00942
map04970	Salivary secretion	0.138841	0.295596	1	2	22	306	Over	Com_3618_pos	cpd:C00942
map00380	Tryptophan metabolism	0.156306	0.32238	2	10	22	306	Over	Com_4454_pos Com_4590_pos	cpd:C05643,cpd:C05635
map00332	Carbapenem biosynthesis	0.201161	0.340427	1	3	22	306	Over	Com_2058_pos	cpd:C00025
map00524	Neomycin, kanamycin and gentamicin biosynthesis	0.201161	0.340427	1	3	22	306	Over	Com_2058_pos	cpd:C00025
map00633	Nitrotoluene degradation	0.201161	0.340427	1	3	22	306	Over	Com_5981_pos	cpd:C16396
map00720	Carbon fixation pathways in prokaryotes	0.201161	0.340427	1	3	22	306	Over	Com_4155_pos	cpd:C00026
map04726	Serotonergic synapse	0.201161	0.340427	1	3	22	306	Over	Com_4590_pos	cpd:C05635
map04924	Renin secretion	0.201161	0.340427	1	3	22	306	Over	Com_3618_pos	cpd:C00942
map04925	Aldosterone synthesis and secretion	0.201161	0.340427	1	3	22	306	Over	Com_3618_pos	cpd:C00942
map00261	Monobactam biosynthesis	0.259163	0.363931	1	4	22	306	Over	Com_621_pos	cpd:C00019
map00270	Cysteine and methionine metabolism	0.259163	0.363931	1	4	22	306	Over	Com_621_pos	cpd:C00019
map00300	Lysine biosynthesis	0.259163	0.363931	1	4	22	306	Over	Com_4155_pos	cpd:C00026
map00592	alpha-Linolenic acid metabolism	0.259163	0.363931	1	4	22	306	Over	Com_4304_pos	cpd:C16322
map00908	Zeatin biosynthesis	0.259163	0.363931	1	4	22	306	Over	Com_621_pos	cpd:C00019
map00950	Isoquinoline alkaloid biosynthesis	0.259163	0.363931	1	4	22	306	Over	Com_3511_pos	cpd:C06171
map02060	Phosphotransferase system (PTS)	0.259163	0.363931	1	4	22	306	Over	Com_2625_pos	cpd:C16488
map04923	Regulation of lipolysis in adipocytes	0.259163	0.363931	1	4	22	306	Over	Com_3618_pos	cpd:C00942
map00140	Steroid hormone biosynthesis	0.265918	0.365637	2	14	22	306	Over	Com_369_pos Com_4108_pos	cpd:C11134,cpd:C11135
map01065	Biosynthesis of alkaloids derived from histidine and purine	0.313131	0.421769	1	5	22	306	Over	Com_4155_pos	cpd:C00026
map01063	Biosynthesis of alkaloids derived from shikimate pathway	0.322023	0.42507	2	16	22	306	Over	Com_3511_pos Com_4155_pos	cpd:C06171,cpd:C00026
map00410	beta-Alanine metabolism	0.363334	0.461155	1	6	22	306	Over	Com_839_pos	cpd:C00804
map00943	Isoflavonoid biosynthesis	0.363334	0.461155	1	6	22	306	Over	Com_3325_pos	cpd:C10208
map00230	Purine metabolism	0.410023	0.492028	1	7	22	306	Over	Com_3618_pos	cpd:C00942
map00970	Aminoacyl-tRNA biosynthesis	0.410023	0.492028	1	7	22	306	Over	Com_2058_pos	cpd:C00025
map01060	Biosynthesis of plant secondary metabolites	0.426118	0.50221	3	27	22	306	Over	Com_2058_pos Com_4155_pos Com_621_pos	cpd:C00025,cpd:C00026,cpd:C00019
map00960	Tropane, piperidine and pyridine alkaloid biosynthesis	0.493783	0.571749	1	9	22	306	Over	Com_173_pos	cpd:C00729
map01062	Biosynthesis of terpenoids and steroids	0.531281	0.604561	1	10	22	306	Over	Com_4155_pos	cpd:C00026
map01110	Biosynthesis of secondary metabolites	0.566233	0.633413	8	88	22	306	Over	Com_173_pos Com_2058_pos Com_3325_pos Com_3511_pos Com_4304_pos Com_621_pos Com_81_pos Com_985_pos	cpd:C00729,cpd:C00025,cpd:C10208,cpd:C06171,cpd:C16322,cpd:C00019,cpd:C08614,cpd:C18021
map04976	Bile secretion	0.598475	0.647531	1	12	22	306	Over	Com_3618_pos	cpd:C00942
map01061	Biosynthesis of phenylpropanoids	0.675466	0.719045	2	23	22	306	Over	Com_3325_pos Com_4155_pos	cpd:C10208,cpd:C00026

## Sheet: cc6vscc0_KEGGenrich
MapID	MapTitle	Pvalue	AdjustedPv	x1	x2	n	N	EnrichDirect	MetaIDs	kegg_cpd_id
map00330	Arginine and proline metabolism	0.00563061	0.202702	3	8	16	306	Over	Com_2575_pos Com_4208_pos Com_462_pos	cpd:C00334,cpd:C00179,cpd:C10497
map00650	Butanoate metabolism	0.014497	0.260945	2	4	16	306	Over	Com_2575_pos Com_3862_pos	cpd:C00334,cpd:C00741
map00525	Acarbose and validamycin biosynthesis	0.0522876	0.268908	1	1	16	306	Over	Com_111_pos	cpd:C12112
map04727	GABAergic synapse	0.0522876	0.268908	1	1	16	306	Over	Com_2575_pos	cpd:C00334
map04915	Estrogen signaling pathway	0.0522876	0.268908	1	1	16	306	Over	Com_2575_pos	cpd:C00334
map05032	Morphine addiction	0.0522876	0.268908	1	1	16	306	Over	Com_2575_pos	cpd:C00334
map05033	Nicotine addiction	0.0522876	0.268908	1	1	16	306	Over	Com_2575_pos	cpd:C00334
map00960	Tropane, piperidine and pyridine alkaloid biosynthesis	0.0745012	0.306011	2	9	16	306	Over	Com_172_pos Com_937_pos	cpd:C00783,cpd:C00408
map01064	Biosynthesis of alkaloids derived from ornithine, lysine and nicotinic acid	0.0903014	0.306011	2	10	16	306	Over	Com_172_pos Com_937_pos	cpd:C00783,cpd:C00408
map00740	Riboflavin metabolism	0.102004	0.306011	1	2	16	306	Over	Com_2643_pos	cpd:C01847
map04721	Synaptic vesicle cycle	0.102004	0.306011	1	2	16	306	Over	Com_2575_pos	cpd:C00334
map04723	Retrograde endocannabinoid signaling	0.102004	0.306011	1	2	16	306	Over	Com_2575_pos	cpd:C00334
map00404	Staurosporine biosynthesis	0.149267	0.35824	1	3	16	306	Over	Com_1627_pos	cpd:C21110
map02024	Quorum sensing	0.149267	0.35824	1	3	16	306	Over	Com_2575_pos	cpd:C00334
map04742	Taste transduction	0.149267	0.35824	1	3	16	306	Over	Com_2575_pos	cpd:C00334
map00220	Arginine biosynthesis	0.19419	0.38838	1	4	16	306	Over	Com_1379_pos	cpd:C00624
map00760	Nicotinate and nicotinamide metabolism	0.19419	0.38838	1	4	16	306	Over	Com_2575_pos	cpd:C00334
map04024	cAMP signaling pathway	0.19419	0.38838	1	4	16	306	Over	Com_2575_pos	cpd:C00334
map00250	Alanine, aspartate and glutamate metabolism	0.236882	0.448829	1	5	16	306	Over	Com_2575_pos	cpd:C00334
map00410	beta-Alanine metabolism	0.277446	0.494581	1	6	16	306	Over	Com_2575_pos	cpd:C00334
map00260	Glycine, serine and threonine metabolism	0.315982	0.494581	1	7	16	306	Over	Com_2946_pos	cpd:C06231
map01210	2-Oxocarboxylic acid metabolism	0.315982	0.494581	1	7	16	306	Over	Com_1379_pos	cpd:C00624
map04080	Neuroactive ligand-receptor interaction	0.315982	0.494581	1	7	16	306	Over	Com_2575_pos	cpd:C00334
map00310	Lysine degradation	0.352585	0.528878	1	8	16	306	Over	Com_937_pos	cpd:C00408
map00906	Carotenoid biosynthesis	0.387346	0.557778	1	9	16	306	Over	Com_81_pos	cpd:C08614
map00380	Tryptophan metabolism	0.420351	0.573949	1	10	16	306	Over	Com_4454_pos	cpd:C05643
map01100	Metabolic pathways	0.430462	0.573949	8	115	16	306	Over	Com_1379_pos Com_172_pos Com_2575_pos Com_2643_pos Com_2946_pos Com_4208_pos Com_81_pos Com_937_pos	cpd:C00624,cpd:C00783,cpd:C00334,cpd:C01847,cpd:C06231,cpd:C00179,cpd:C08614,cpd:C00408
map00944	Flavone and flavonol biosynthesis	0.451683	0.580736	1	11	16	306	Over	Com_743_pos	cpd:C01750
map01130	Biosynthesis of antibiotics	0.496708	0.616603	4	54	16	306	Over	Com_111_pos Com_1379_pos Com_1627_pos Com_5663_pos	cpd:C12112,cpd:C00624,cpd:C21110,cpd:C17361
map01057	Biosynthesis of type II polyketide products	0.536421	0.622941	1	14	16	306	Over	Com_2643_pos	cpd:C01847
map01230	Biosynthesis of amino acids	0.536421	0.622941	1	14	16	306	Over	Com_1379_pos	cpd:C00624

## Sheet: cp0vscc0_KEGGenrich
MapID	MapTitle	Pvalue	AdjustedPv	x1	x2	n	N	EnrichDirect	MetaIDs	kegg_cpd_id
map00680	Methane metabolism	0.012938	0.260582	2	3	21	306	Over	Com_2316_pos Com_354_pos	cpd:C00168,cpd:C00101
map00941	Flavonoid biosynthesis	0.0137148	0.260582	4	15	21	306	Over	Com_2896_pos Com_3587_pos Com_4614_pos Com_5414_pos	cpd:C05631,cpd:C00852,cpd:C16415,cpd:C01709
map01200	Carbon metabolism	0.024801	0.314146	2	4	21	306	Over	Com_2316_pos Com_354_pos	cpd:C00168,cpd:C00101
map00260	Glycine, serine and threonine metabolism	0.0764923	0.449879	2	7	21	306	Over	Com_2316_pos Com_354_pos	cpd:C00168,cpd:C00101
map00010	Glycolysis / Gluconeogenesis	0.132755	0.449879	1	2	21	306	Over	Com_4042_pos	cpd:C06186
map04611	Platelet activation	0.132755	0.449879	1	2	21	306	Over	Com_811_pos	cpd:C05956
map07034	Eicosanoids	0.132755	0.449879	1	2	21	306	Over	Com_811_pos	cpd:C05956
map00404	Staurosporine biosynthesis	0.192663	0.449879	1	3	21	306	Over	Com_1627_pos	cpd:C21110
map00590	Arachidonic acid metabolism	0.192663	0.449879	1	3	21	306	Over	Com_811_pos	cpd:C05956
map00670	One carbon pool by folate	0.192663	0.449879	1	3	21	306	Over	Com_354_pos	cpd:C00101
map00720	Carbon fixation pathways in prokaryotes	0.192663	0.449879	1	3	21	306	Over	Com_354_pos	cpd:C00101
map01040	Biosynthesis of unsaturated fatty acids	0.192663	0.449879	1	3	21	306	Over	Com_2998_pos	cpd:C06429
map04726	Serotonergic synapse	0.192663	0.449879	1	3	21	306	Over	Com_811_pos	cpd:C05956
map00140	Steroid hormone biosynthesis	0.248103	0.449879	2	14	21	306	Over	Com_3277_pos Com_361_pos	cpd:C01227,cpd:C05472
map00630	Glyoxylate and dicarboxylate metabolism	0.248617	0.449879	1	4	21	306	Over	Com_2316_pos	cpd:C00168
map00650	Butanoate metabolism	0.248617	0.449879	1	4	21	306	Over	Com_3862_pos	cpd:C00741
map00790	Folate biosynthesis	0.248617	0.449879	1	4	21	306	Over	Com_354_pos	cpd:C00101
map00984	Steroid degradation	0.248617	0.449879	1	4	21	306	Over	Com_3277_pos	cpd:C01227
map01523	Antifolate resistance	0.248617	0.449879	1	4	21	306	Over	Com_354_pos	cpd:C00101
map02060	Phosphotransferase system (PTS)	0.248617	0.449879	1	4	21	306	Over	Com_4042_pos	cpd:C06186
map04913	Ovarian steroidogenesis	0.248617	0.449879	1	4	21	306	Over	Com_3277_pos	cpd:C01227
map00945	Stilbenoid, diarylheptanoid and gingerol biosynthesis	0.300866	0.511016	1	5	21	306	Over	Com_3587_pos	cpd:C00852
map00350	Tyrosine metabolism	0.349642	0.511016	1	6	21	306	Over	Com_2265_pos	cpd:C05579
map00480	Glutathione metabolism	0.349642	0.511016	1	6	21	306	Over	Com_3834_pos	cpd:C16563
map05200	Pathways in cancer	0.349642	0.511016	1	6	21	306	Over	Com_3277_pos	cpd:C01227
map05215	Prostate cancer	0.349642	0.511016	1	6	21	306	Over	Com_3277_pos	cpd:C01227
map00230	Purine metabolism	0.395167	0.536299	1	7	21	306	Over	Com_131_pos	cpd:C00366
map00970	Aminoacyl-tRNA biosynthesis	0.395167	0.536299	1	7	21	306	Over	Com_354_pos	cpd:C00101
map00906	Carotenoid biosynthesis	0.477276	0.574735	1	9	21	306	Over	Com_4230_pos	cpd:C15968
map00960	Tropane, piperidine and pyridine alkaloid biosynthesis	0.477276	0.574735	1	9	21	306	Over	Com_173_pos	cpd:C00729
map00380	Tryptophan metabolism	0.514237	0.574735	1	10	21	306	Over	Com_164_pos	cpd:C00955
map00940	Phenylpropanoid biosynthesis	0.514237	0.574735	1	10	21	306	Over	Com_3587_pos	cpd:C00852
map01064	Biosynthesis of alkaloids derived from ornithine, lysine and nicotinic acid	0.514237	0.574735	1	10	21	306	Over	Com_173_pos	cpd:C00729
map04976	Bile secretion	0.580826	0.630611	1	12	21	306	Over	Com_131_pos	cpd:C00366
map01130	Biosynthesis of antibiotics	0.772745	0.815675	4	54	21	306	Over	Com_1627_pos Com_2316_pos Com_2640_pos Com_505_pos	cpd:C21110,cpd:C00168,cpd:C17979,cpd:C02078

## Sheet: cp6vscc6_KEGGenrich
MapID	MapTitle	Pvalue	AdjustedPv	x1	x2	n	N	EnrichDirect	MetaIDs	kegg_cpd_id
map00941	Flavonoid biosynthesis	3.17328e-05	0.00139624	7	15	24	306	Over	Com_1353_pos Com_2414_pos Com_2896_pos Com_3587_pos Com_4614_pos Com_5414_pos Com_799_pos	cpd:C00509,cpd:C01709,cpd:C05631,cpd:C00852,cpd:C16415,cpd:C01709,cpd:C09099
map00908	Zeatin biosynthesis	0.0321518	0.345098	2	4	24	306	Over	Com_4235_pos Com_4242_pos	cpd:C00020,cpd:C00147
map00480	Glutathione metabolism	0.0728849	0.345098	2	6	24	306	Over	Com_2088_pos Com_3834_pos	cpd:C01419,cpd:C16563
map00121	Secondary bile acid biosynthesis	0.0784314	0.345098	1	1	24	306	Over	Com_3244_pos	cpd:C04483
map00904	Diterpenoid biosynthesis	0.0784314	0.345098	1	1	24	306	Over	Com_4295_pos	cpd:C06087
map04068	FoxO signaling pathway	0.0784314	0.345098	1	1	24	306	Over	Com_4235_pos	cpd:C00020
map04150	mTOR signaling pathway	0.0784314	0.345098	1	1	24	306	Over	Com_4235_pos	cpd:C00020
map04151	PI3K-Akt signaling pathway	0.0784314	0.345098	1	1	24	306	Over	Com_4235_pos	cpd:C00020
map04211	Longevity regulating pathway	0.0784314	0.345098	1	1	24	306	Over	Com_4235_pos	cpd:C00020
map00230	Purine metabolism	0.0971969	0.388788	2	7	24	306	Over	Com_4235_pos Com_4242_pos	cpd:C00020,cpd:C00147
map00010	Glycolysis / Gluconeogenesis	0.150948	0.443777	1	2	24	306	Over	Com_4042_pos	cpd:C06186
map04022	cGMP-PKG signaling pathway	0.150948	0.443777	1	2	24	306	Over	Com_4235_pos	cpd:C00020
map04740	Olfactory transduction	0.150948	0.443777	1	2	24	306	Over	Com_4235_pos	cpd:C00020
map00960	Tropane, piperidine and pyridine alkaloid biosynthesis	0.151288	0.443777	2	9	24	306	Over	Com_172_pos Com_173_pos	cpd:C00783,cpd:C00729
map01064	Biosynthesis of alkaloids derived from ornithine, lysine and nicotinic acid	0.180261	0.473712	2	10	24	306	Over	Com_172_pos Com_173_pos	cpd:C00783,cpd:C00729
map01040	Biosynthesis of unsaturated fatty acids	0.217979	0.473712	1	3	24	306	Over	Com_2998_pos	cpd:C06429
map04152	AMPK signaling pathway	0.217979	0.473712	1	3	24	306	Over	Com_4235_pos	cpd:C00020
map04742	Taste transduction	0.217979	0.473712	1	3	24	306	Over	Com_4235_pos	cpd:C00020
map04924	Renin secretion	0.217979	0.473712	1	3	24	306	Over	Com_4235_pos	cpd:C00020
map00984	Steroid degradation	0.279921	0.473712	1	4	24	306	Over	Com_3277_pos	cpd:C01227
map01523	Antifolate resistance	0.279921	0.473712	1	4	24	306	Over	Com_4235_pos	cpd:C00020
map02060	Phosphotransferase system (PTS)	0.279921	0.473712	1	4	24	306	Over	Com_4042_pos	cpd:C06186
map04024	cAMP signaling pathway	0.279921	0.473712	1	4	24	306	Over	Com_4235_pos	cpd:C00020
map04913	Ovarian steroidogenesis	0.279921	0.473712	1	4	24	306	Over	Com_3277_pos	cpd:C01227
map04923	Regulation of lipolysis in adipocytes	0.279921	0.473712	1	4	24	306	Over	Com_4235_pos	cpd:C00020
map00945	Stilbenoid, diarylheptanoid and gingerol biosynthesis	0.337146	0.519997	1	5	24	306	Over	Com_3587_pos	cpd:C00852
map01065	Biosynthesis of alkaloids derived from histidine and purine	0.337146	0.519997	1	5	24	306	Over	Com_4235_pos	cpd:C00020
map00350	Tyrosine metabolism	0.389998	0.519997	1	6	24	306	Over	Com_2265_pos	cpd:C05579
map00860	Porphyrin and chlorophyll metabolism	0.389998	0.519997	1	6	24	306	Over	Com_985_pos	cpd:C18021
map00943	Isoflavonoid biosynthesis	0.389998	0.519997	1	6	24	306	Over	Com_1353_pos	cpd:C00509
map05200	Pathways in cancer	0.389998	0.519997	1	6	24	306	Over	Com_3277_pos	cpd:C01227
map05215	Prostate cancer	0.389998	0.519997	1	6	24	306	Over	Com_3277_pos	cpd:C01227
map00906	Carotenoid biosynthesis	0.525414	0.679948	1	9	24	306	Over	Com_4230_pos	cpd:C15968
map00380	Tryptophan metabolism	0.563764	0.689045	1	10	24	306	Over	Com_4454_pos	cpd:C05643
map00940	Phenylpropanoid biosynthesis	0.563764	0.689045	1	10	24	306	Over	Com_3587_pos	cpd:C00852
map01110	Biosynthesis of secondary metabolites	0.778757	0.879541	8	88	24	306	Over	Com_1353_pos Com_172_pos Com_173_pos Com_2896_pos Com_3587_pos Com_4235_pos Com_4295_pos Com_985_pos	cpd:C00509,cpd:C00783,cpd:C00729,cpd:C05631,cpd:C00852,cpd:C00020,cpd:C06087,cpd:C18021
map04976	Bile secretion	1	1	1	12	24	306	Over	Com_3244_pos	cpd:C04483
